# Supplementary material for: The termination of UHRF1-dependent PAF15 ubiquitin signaling is regulated by USP7 and ATAD5
Source: eLife journal article supplement (doi:10.7554/elife.79013), 2023-02-03
Supplement: fig2-figsupp1-data1 [file Figure 2-figure supplement 1A_Source data.xlsx]

## Sheet: Sheet1
WT_4				WT_5				WT_6
22071304Fit_X	22071304Fit_Y	22071304_X	22071304_Y	22071305Fit_X	22071305Fit_Y	22071305_X	22071305_Y	22071306Fit_X	22071306Fit_Y	22071306_X	22071306_Y		Y_Ave	Y_Ave_Fit	Y_SD
0.116166	-2.4829	0.700395	-2.17711	0.116166	-1.84827	0.700395	-1.62788	0.116166	-1.97567	0.700395	-1.68317		-1.82939	-2.10228	0.246912
0.700395	-2.19367	1.29024	-1.79995	0.700395	-1.64091	1.29024	-1.37109	0.700395	-1.68083	1.29024	-1.27036		-1.48046	-1.83847	0.229624
1.29024	-1.76164	1.88569	-1.42424	1.29024	-1.33661	1.88569	-1.07407	1.29024	-1.27252	1.88569	-0.967082		-1.15513	-1.45692	0.195236
1.88569	-1.41259	2.48676	-1.09309	1.88569	-1.09256	2.48676	-0.912221	1.88569	-0.979014	2.48676	-0.778388		-0.927899	-1.16139	0.128953
2.48676	-1.14566	3.09343	-0.920017	2.48676	-0.904288	3.09343	-0.74511	2.48676	-0.777874	3.09343	-0.659041		-0.774723	-0.942608	0.108581
3.09343	-0.946982	3.70572	-0.840121	3.09343	-0.761643	3.70572	-0.62064	3.09343	-0.641062	3.70572	-0.587199		-0.682653	-0.783229	0.11218
3.70572	-0.800172	4.32363	-0.676681	3.70572	-0.653971	4.32363	-0.609447	3.70572	-0.546744	4.32363	-0.439727		-0.575285	-0.666962	0.0997065
4.32363	-0.691173	4.94714	-0.640684	4.32363	-0.572289	4.94714	-0.490701	4.32363	-0.48027	4.94714	-0.450923		-0.527436	-0.581244	0.0817084
4.94714	-0.609343	5.57627	-0.536885	4.94714	-0.509714	5.57627	-0.466296	4.94714	-0.432267	5.57627	-0.363832		-0.455671	-0.517108	0.0710469
5.57627	-0.547047	6.21101	-0.49298	5.57627	-0.461197	6.21101	-0.418057	5.57627	-0.396772	6.21101	-0.375146		-0.428728	-0.468339	0.0486937
6.21101	-0.498912	6.85137	-0.471365	6.21101	-0.423096	6.85137	-0.398124	6.21101	-0.369944	6.85137	-0.311797		-0.393762	-0.430651	0.0652163
6.85137	-0.461172	7.49733	-0.410098	6.85137	-0.392793	7.49733	-0.425768	6.85137	-0.349263	7.49733	-0.341506		-0.392457	-0.401076	0.0365916
7.49733	-0.431168	8.14891	-0.465482	7.49733	-0.368397	8.14891	-0.369659	7.49733	-0.333034	8.14891	-0.352851		-0.395997	-0.377533	0.0496099
8.14891	-0.407001	8.8061	-0.393022	8.14891	-0.34853	8.8061	-0.298503	8.14891	-0.320096	8.8061	-0.303568		-0.331698	-0.358542	0.0434121
8.8061	-0.387301	9.4689	-0.391593	8.8061	-0.332177	9.4689	-0.297931	8.8061	-0.309635	9.4689	-0.285657		-0.32506	-0.343038	0.0473118
9.4689	-0.371064	10.1373	-0.33451	9.4689	-0.318583	10.1373	-0.340353	9.4689	-0.301068	10.1373	-0.267918		-0.31426	-0.330238	0.0328557
10.1373	-0.357547	10.8113	-0.331987	10.1373	-0.30718	10.8113	-0.301185	10.1373	-0.293973	10.8113	-0.264337		-0.29917	-0.319567	0.0276547
10.8113	-0.346188	11.491	-0.305371	10.8113	-0.297532	11.491	-0.243746	10.8113	-0.288035	11.491	-0.352913		-0.300677	-0.310585	0.0446907
11.491	-0.336561			11.491	-0.289306			11.491	-0.28302					-0.302962
K9396A_3				K9396A_7				K9396A_8
22071303Fit_X	22071303Fit_Y	22071303_X	22071303_Y	22071307Fit_X	22071307Fit_Y	22071307_X	22071307_Y	22071308Fit_X	22071308Fit_Y	22071308_X	22071308_Y		Y_Ave	Y_Ave_Fit	Y_SD
		0.700395	-0.032911			0.700395	-0.608402			0.700395	-0.43928		-0.360198	#DIV/0!	0.241506
		1.29024	-0.021151			1.29024	-0.596455			1.29024	-0.396045		-0.337884		0.23844
		1.88569	-0.051089			1.88569	-0.495848			1.88569	-0.354734		-0.300557		0.185569
		2.48676	-0.043915			2.48676	-0.426466			2.48676	-0.342301		-0.270894		0.164135
		3.09343	-0.010736			3.09343	-0.375695			3.09343	-0.367282		-0.251238		0.170095
		3.70572	-0.025495			3.70572	-0.378099			3.70572	-0.349731		-0.251108		0.159953
		4.32363	-0.020938			4.32363	-0.386333			4.32363	-0.354579		-0.25395		0.165274
		4.94714	-0.084665			4.94714	-0.378165			4.94714	-0.301424		-0.254751		0.124283
		5.57627	0.006932			5.57627	-0.340005			5.57627	-0.315115		-0.216063		0.158008
		6.21101	-0.014585			6.21101	-0.328109			6.21101	-0.344847		-0.22918		0.151896
		6.85137	-0.09885			6.85137	-0.324093			6.85137	-0.272549		-0.231831		0.0963573
		7.49733	-0.060558			7.49733	-0.335801			7.49733	-0.253862		-0.21674		0.115393
		8.14891	-0.01307			8.14891	-0.245438			8.14891	-0.233576		-0.164028		0.106853
		8.8061	-0.012186			8.8061	-0.323935			8.8061	-0.26331		-0.19981		0.134959
		9.4689	-0.053353			9.4689	-0.272963			9.4689	-0.278333		-0.20155		0.104814
		10.1373	-0.0574			10.1373	-0.299243			10.1373	-0.262854		-0.206499		0.10647
		10.8113	0.003011			10.8113	-0.241534			10.8113	-0.230522		-0.156348		0.112774
		11.491	-0.035495			11.491	-0.267717			11.491	-0.220714		-0.174642		0.100245
K93A_1
22072101Fit_X	22072101Fit_Y	22072101_X	22072101_Y
		0.700395	-0.438542
		1.29024	-0.414715
		1.88569	-0.300611
		2.48676	-0.362063
		3.09343	-0.348399
		3.70572	-0.322442
		4.32363	-0.291288
		4.94714	-0.293586
		5.57627	-0.254744
		6.21101	-0.247064
		6.85137	-0.219685
		7.49733	-0.19833
		8.14891	-0.257735
		8.8061	-0.236521
		9.4689	-0.223601
		10.1373	-0.194921
		10.8113	-0.204442
		11.491	-0.239929
