# Supplementary material for: The termination of UHRF1-dependent PAF15 ubiquitin signaling is regulated by USP7 and ATAD5
Source: eLife journal article supplement (doi:10.7554/elife.79013), 2023-02-03
Supplement: fig7-data1 [file Figure 7-Source data 1.xlsx]

## Sheet: Sheet1
Incorporation of 3H-SAM (DPM)
	replicate1							replicate2							replicate3
		60 min	90 min	120 min	150 min	180 min			60 min	90 min	120 min	150 min	180 min			60 min	90 min	120 min	150 min	180 min
	ΔMock	200.98	760.94	1145.71	1280.3	1306.51		ΔMock	232.48	936.5	1677.38	1576.75	2082.67		ΔMock	226.37	902.87	1696.17	1652.22	2088.23
	ΔUSP7	129.98	880.33	1066.29	1108.24	1343.42		ΔUSP7	121.74	682.82	1485.18	1444.96	1778.85		ΔUSP7	143.06	693.63	1470.21	1650.5	1990.15
	replicate1								replicate2						replicate3
		60 min	90 min	120 min	150 min	180 min			60 min	90 min	120 min	150 min	180 min			60 min	90 min	120 min	150 min	180 min
	ΔMock	124.69	618.28	1147.91	1507.05	2078.83		ΔMock	143.36	1125.18	1375.18	1662.02	1808.83		ΔMock	194.71	790.54	1380.52	1535.03	1757.19
	ΔATAD5	191.46	796.94	1231.44	1641.06	1986		ΔATAD5	199.39	1052.81	1670.84	2131.38	2329.05		ΔATAD5	220.29	1133.57	1758.79	1957.61	2315
	replicate1								replicate2								replicate3
			60 min	90 min	120 min	150 min	180 min				60 min	90 min	120 min	150 min	180 min				60 min	90 min	120 min	150 min	180 min
		ΔMock	69.22	459.24	971.13	1403.35	2018.7			ΔMock	61.6	419.52	750.2	1106.55	1227.72			ΔMock	97.88	444.54	686.68	1033.82	1126.29
	ΔUSP7/ATAD5		90.9	733.51	1416.78	1702.94	2324.26		ΔUSP7/ATAD5		71.49	521.86	1180.99	1414.46	1718.44		ΔUSP7/ATAD5		69.93	664.87	1157.43	1601.42	1726.62
