# Supplementary material for: The termination of UHRF1-dependent PAF15 ubiquitin signaling is regulated by USP7 and ATAD5
Source: eLife journal article supplement (doi:10.7554/elife.79013), 2023-02-03
Supplement: fig7-figsupp1-data1 [file Figure 7-figure supplment 1B source data 1.xlsx]

## Sheet: Sheet1
		Time (min)	Mock-depleted (#1)	Mock-depleted (#2)	Mock-depleted (#3)	USP7-depleted (#1)	USP7-depleted (#2)	USP7-depleted (#3)	ATAD5-depleted (#1)	ATAD5-depleted (#2)	ATAD5-depleted (#3)	USP7/ATAD5-depleted (#1)	USP7/ATAD5-depleted (#2)	USP7/ATAD5-depleted (#3)
		0	0	0	0	0	0	0	0	0	0	0	0	0
		30	4.22	4.26	4.78	5.64	2.2	4.36	5.81	1.98	3.56	2.65	0.49	0.91
		60	51.82	53.3	52.9	52.2	40.46	54.16	67.85	65.46	62.19	56.67	44.06	45.88
		90	84.5	83.27	75.39	75.08	81.18	80.07	94.19	96.49	90.4	85.4	78.34	81.89
		120	96.05	92.49	85.66	89.35	89.41	89.22	101.95	104.58	104.99	99.32	88.5	93.98
