# Supplementary material for: The termination of UHRF1-dependent PAF15 ubiquitin signaling is regulated by USP7 and ATAD5
Source: eLife journal article supplement (doi:10.7554/elife.79013), 2023-02-03
Supplement: fig7-figsupp1-data1 [file Figure 7-figure supplment 1C source data 1.xlsx]

## Sheet: Sheet1
DNA methylation (A.U)
	replicate1			replicate2			replicate3
		120 min			120 min			120 min
	ΔMock	100		ΔMock	100		ΔMock	100
	ΔATAD5	95.6		ΔATAD5	99.8		ΔATAD5	108
	ΔUSP7/ATAD5	114		ΔUSP7/ATAD5	120		ΔUSP7/ATAD5	115
