# Supplementary material for: The termination of UHRF1-dependent PAF15 ubiquitin signaling is regulated by USP7 and ATAD5
Source: eLife journal article supplement (doi:10.7554/elife.79013), 2023-02-03
Supplement: fig8-data1 [file Figure 8C-Source Data_revised.xlsx]

## Sheet: Sheet1
	condition	5mC, %
wt	naïve	24.1
wt	naïve	24.7
wt	naïve	23.9
wt	naïve	23.5
wt	naïve	24.2
wt	naïve	23.8
PAF15 SAKA	naïve	25.9
PAF15 SAKA	naïve	25.8
PAF15 SAKA	naïve	25.5
PAF15 SAKA	naïve	25.8
PAF15 SAKA	naïve	26.1
PAF15 SAKA	naïve	25.6
wt	epiblast	39.7
wt	epiblast	39.6
wt	epiblast	39.3
wt	epiblast	40.1
wt	epiblast	40.3
wt	epiblast	40
PAF15 SAKA	epiblast	43.6
PAF15 SAKA	epiblast	44.8
PAF15 SAKA	epiblast	45
PAF15 SAKA	epiblast	44.2
PAF15 SAKA	epiblast	45.5
PAF15 SAKA	epiblast	44.4
