# Supplementary material for: The termination of UHRF1-dependent PAF15 ubiquitin signaling is regulated by USP7 and ATAD5
Source: eLife. 2023 Feb 3;12:e79013. doi: 10.7554/eLife.79013 (PMC9943068; doi:10.7554/eLife.79013)
Supplement: Supplementary file 1. [file elife-79013-supp1.xlsx]

## Sheet: Sheet1
Supplementary Table 1: MS-based quantification of GST interacting proteins
Accession	Description	Score	Coverage	# Proteins	# Unique Peptides	# Peptides	# PSMs	# AAs	MW [kDa]	calc. pI
NP_001008435.1	40S ribosomal protein S12 [Xenopus tropicalis]	7169.25	62.12	7	1	6	102	132	14.5055	7.23975
	Confidence Level	Sequence	PSM Ambiguity	# Proteins	# Protein Groups	Protein Group Accessions	Modifications	Activation Type	ΔScore	ΔCn	Rank	Search Engine Rank	IonScore	Exp Value	# Missed Cleavages	Isolation Interference [%]	Ion Inject Time [ms]	Charge	m/z [Da]	MH+ [Da]	ΔM [ppm]	RT [min]	First Scan	Last Scan	MS Order	Ions Matched	Spectrum File
	High	aEEGISAGGVMDVNTALQEVLK	Unambiguous	3	1	NP_001008435.1	N-Term(Acetyl)	CID	0.5294	0	1	1	152.59	8.17949e-15	0	21.425	6	2	1137.07	2273.14	1.51153	120.086	13978	13978	MS2	15/218	170306_chiba_GST_02.raw
	High	aEEGISAGGVMDVNTALQEVLK	Unambiguous	3	1	NP_001008435.1	N-Term(Acetyl)	CID	0.5695	0	1	1	150.93	1.20278e-14	0	27.1596	21	2	1137.07	2273.14	1.08192	141.778	16753	16753	MS2	24/218	170306_chiba_GST_02.raw
	High	aEEGISAGGVMDVNTALQEVLK	Unambiguous	3	1	NP_001008435.1	N-Term(Acetyl)	CID	0.5338	0	1	1	147.94	2.40238e-14	0	31.2937	7	2	1137.07	2273.14	1.18932	120.702	14060	14060	MS2	28/218	170306_chiba_GST_02.raw
	High	aEEGISAGGVMDVNTALQEVLK	Unambiguous	3	1	NP_001008435.1	N-Term(Acetyl)	CID	0.5594	0	1	1	143.3	7.03941e-14	0	13.8649	15	2	1137.07	2273.13	0.222697	129.842	15254	15254	MS2	25/218	170306_chiba_GST_02.raw
	High	aEEGISAGGVMDVNTALQEVLK	Unambiguous	3	1	NP_001008435.1	N-Term(Acetyl)	CID	0.5175	0	1	1	142.99	7.56026e-14	0	43.0893	16	2	1137.07	2273.13	0.222697	137.46	16213	16213	MS2	16/218	170306_chiba_GST_02.raw
	High	aEEGISAGGVMDVNTALQEVLK	Unambiguous	3	1	NP_001008435.1	N-Term(Acetyl)	CID	0.5149	0	1	1	133.78	6.30284e-13	0	29.8242	16	2	1137.07	2273.13	0.222697	131.043	15406	15406	MS2	24/218	170306_chiba_GST_02.raw
	High	aEEGISAGGVMDVNTALQEVLK	Unambiguous	3	1	NP_001008435.1	N-Term(Acetyl)	CID	0.5149	0	1	1	133.63	6.39429e-13	0	30.7028	7	2	1137.07	2273.13	0.544905	123.109	14375	14375	MS2	24/218	170306_chiba_GST_02.raw
	High	aEEGISAGGVMDVNTALQEVLK	Unambiguous	3	1	NP_001008435.1	N-Term(Acetyl)	CID	0.5564	0	1	1	133.16	7.07681e-13	0	38.0556	17	2	1137.07	2273.13	0.3301	134.548	15847	15847	MS2	27/218	170306_chiba_GST_02.raw
	High	aEEGISAGGVMDVNTALQEVLK	Unambiguous	3	1	NP_001008435.1	N-Term(Acetyl)	CID	0.5725	0	1	1	130.87	1.2277e-12	0	14.2389	6	2	1137.07	2273.13	0.115295	118.29	13741	13741	MS2	22/218	170306_chiba_GST_02.raw
	High	aEEGISAGGVMDVNTALQEVLK	Unambiguous	3	1	NP_001008435.1	N-Term(Acetyl)	CID	0.5154	0	1	1	130.34	1.38242e-12	0	26.5058	29	2	1137.07	2273.13	0.437503	138.221	16307	16307	MS2	27/218	170306_chiba_GST_02.raw
	High	aEEGISAGGVMDVNTALQEVLK	Unambiguous	3	1	NP_001008435.1	N-Term(Acetyl)	CID	0.5692	0	1	1	129.72	1.5679e-12	0	24.8982	100	2	1137.07	2273.13	0.652308	149.393	17555	17555	MS2	27/218	170306_chiba_GST_02.raw
	High	aEEGISAGGVMDVNTALQEVLK	Unambiguous	3	1	NP_001008435.1	N-Term(Acetyl)	CID	0.4961	0	1	1	129.2	1.8034e-12	0	0	21	2	1137.07	2273.13	0.115295	138.389	16328	16328	MS2	16/218	170306_chiba_GST_02.raw
	High	aEEGISAGGVMDVNTALQEVLK	Unambiguous	3	1	NP_001008435.1	N-Term(Acetyl)	CID	0.5938	0	1	1	127.51	2.64354e-12	0	21.5342	100	2	1137.07	2273.14	1.08192	146.337	17277	17277	MS2	28/218	170306_chiba_GST_02.raw
	High	aEEGISAGGVMDVNTALQEVLK	Unambiguous	3	1	NP_001008435.1	N-Term(Acetyl)	CID	0.5433	0	1	1	127.26	2.77199e-12	0	25.7364	7	2	1137.07	2273.13	0.544905	121.459	14159	14159	MS2	27/218	170306_chiba_GST_02.raw
	High	aEEGISAGGVMDVNTALQEVLK	Unambiguous	3	1	NP_001008435.1	N-Term(Acetyl)	CID	0.5161	0	1	1	123.89	6.10437e-12	0	22.5241	17	2	1137.07	2273.13	0.437503	132.692	15613	15613	MS2	26/218	170306_chiba_GST_02.raw
	High	aEEGISAGGVMDVNTALQEVLK	Unambiguous	3	1	NP_001008435.1	N-Term(Acetyl)	CID	0.5798	0	1	1	119.03	1.79412e-11	0	17.2561	12	2	1137.07	2273.13	0.75971	119.109	13849	13849	MS2	16/218	170306_chiba_GST_02.raw
	High	aEEGISAGGVMDVNTALQEVLK	Unambiguous	3	1	NP_001008435.1	N-Term(Acetyl)	CID	0.513	0	1	1	115.33	4.20583e-11	0	7.57861	29	2	1137.07	2273.13	0.75971	132.541	15594	15594	MS2	26/218	170306_chiba_GST_02.raw
	High	aEEGISAGGVMDVNTALQEVLK	Unambiguous	3	1	NP_001008435.1	N-Term(Acetyl)	CID	0.5391	0	1	1	115.25	4.493e-11	0	24.8581	24	2	1137.07	2273.13	0.222697	127.098	14898	14898	MS2	16/218	170306_chiba_GST_02.raw
	High	aEEGISAGGVMDVNTALQEVLK	Unambiguous	3	1	NP_001008435.1	N-Term(Acetyl)	CID	0.5652	0	1	1	115.21	4.41405e-11	0	27.0695	13	2	1137.07	2273.13	0.3301	128.516	15082	15082	MS2	16/218	170306_chiba_GST_02.raw
	High	aEEGISAGGVMDVNTALQEVLK	Unambiguous	3	1	NP_001008435.1	N-Term(Acetyl)	CID	0.5652	0	1	1	115.07	4.54311e-11	0	13.2236	54	2	1137.07	2273.14	0.974515	146.643	17305	17305	MS2	24/218	170306_chiba_GST_02.raw
	High	aEEGISAGGVMDVNTALQEVLK	Unambiguous	3	1	NP_001008435.1	N-Term(Acetyl)	CID	0.5826	0	1	1	114.9	4.82155e-11	0	45.3787	10	2	1137.07	2273.14	1.08192	125.194	14649	14649	MS2	16/218	170306_chiba_GST_02.raw
	High	aEEGISAGGVMDVNTALQEVLK	Unambiguous	3	1	NP_001008435.1	N-Term(Acetyl)	CID	0.4956	0	1	1	112.54	8.21849e-11	0	10.2042	5	2	1137.07	2273.13	0.544905	115.569	13384	13384	MS2	26/218	170306_chiba_GST_02.raw
	High	aEEGISAGGVMDVNTALQEVLK	Unambiguous	3	1	NP_001008435.1	N-Term(Acetyl)	CID	0.5	0	1	1	112.04	9.34633e-11	0	25.143	12	2	1137.07	2273.13	0.437503	119.425	13891	13891	MS2	15/218	170306_chiba_GST_02.raw
	High	aEEGISAGGVMDVNTALQEVLK	Unambiguous	3	1	NP_001008435.1	N-Term(Acetyl)	CID	0.5273	0	1	1	110.49	1.28189e-10	0	11.0837	10	2	1137.07	2273.13	0.75971	122.932	14352	14352	MS2	26/218	170306_chiba_GST_02.raw
	High	aEEGISAGGVMDVNTALQEVLK	Unambiguous	3	1	NP_001008435.1	N-Term(Acetyl)	CID	0.5182	0	1	1	109.9	1.52982e-10	0	19.4682	16	2	1137.07	2273.14	1.18932	130.166	15296	15296	MS2	16/218	170306_chiba_GST_02.raw
	High	aEEGISAGGVMDVNTALQEVLK	Unambiguous	3	1	NP_001008435.1	N-Term(Acetyl)	CID	0.5273	0	1	1	109.54	1.63425e-10	0	16.6618	8	2	1137.07	2273.13	0.652308	119.553	13908	13908	MS2	25/218	170306_chiba_GST_02.raw
	High	aEEGISAGGVMDVNTALQEVLK	Unambiguous	3	1	NP_001008435.1	N-Term(Acetyl)	CID	0.5688	0	1	1	109.22	1.80708e-10	0	44.1461	9	2	1137.07	2273.14	1.40413	124.833	14602	14602	MS2	16/218	170306_chiba_GST_02.raw
	High	aEEGISAGGVMDVNTALQEVLK	Unambiguous	3	1	NP_001008435.1	N-Term(Acetyl)	CID	0.4771	0	1	1	109.13	1.8327e-10	0	23.812	1	2	1137.07	2273.13	0.115295	113.626	13126	13126	MS2	25/218	170306_chiba_GST_02.raw
	High	aEEGISAGGVMDVNTALQEVLK	Unambiguous	3	1	NP_001008435.1	N-Term(Acetyl)	CID	0.5185	0	1	1	107.95	2.47701e-10	0	17.7872	28	2	1137.07	2273.13	0.00789192	136.892	16143	16143	MS2	28/218	170306_chiba_GST_02.raw
	High	aEEGISAGGVMDVNTALQEVLK	Unambiguous	3	1	NP_001008435.1	N-Term(Acetyl)	CID	0.4815	0	1	1	107.63	2.58013e-10	0	17.4433	18	2	1137.07	2273.13	0.437503	124.248	14525	14525	MS2	22/218	170306_chiba_GST_02.raw
	High	aEEGISAGGVMDVNTALQEVLK	Unambiguous	3	1	NP_001008435.1	N-Term(Acetyl)	CID	0.5327	0	1	1	107.29	2.79024e-10	0	19.684	7	2	1137.07	2273.13	0.437503	118.802	13808	13808	MS2	25/218	170306_chiba_GST_02.raw
	High	aEEGISAGGVMDVNTALQEVLK	Unambiguous	3	1	NP_001008435.1	N-Term(Acetyl)	CID	0.5701	0	1	1	107.03	2.99211e-10	0	33.25	6	2	1137.07	2273.14	0.867113	117.934	13695	13695	MS2	16/218	170306_chiba_GST_02.raw
	High	aEEGISAGGVMDVNTALQEVLK	Unambiguous	3	1	NP_001008435.1	N-Term(Acetyl)	CID	0.486	0	1	1	106.52	3.33151e-10	0	33.945	26	2	1137.07	2273.13	0.437503	139.415	16457	16457	MS2	14/218	170306_chiba_GST_02.raw
	High	aEEGISAGGVMDVNTALQEVLK	Unambiguous	3	1	NP_001008435.1	N-Term(Acetyl)	CID	0.5755	0	1	1	106.27	3.48171e-10	0	13.1838	21	2	1137.07	2273.13	0.544905	142.002	16782	16782	MS2	28/218	170306_chiba_GST_02.raw
	High	aEEGISAGGVMDVNTALQEVLK	Unambiguous	3	1	NP_001008435.1	N-Term(Acetyl)	CID	0.5472	0	1	1	106	3.70503e-10	0	16.4844	1	2	1137.07	2273.13	0.544905	112.81	13019	13019	MS2	26/218	170306_chiba_GST_02.raw
	High	aEEGISAGGVMDVNTALQEVLK	Unambiguous	3	1	NP_001008435.1	N-Term(Acetyl)	CID	0.5377	0	1	1	105.54	4.20278e-10	0	35.1412	32	2	1137.07	2273.13	0.222697	141.095	16667	16667	MS2	24/218	170306_chiba_GST_02.raw
	High	aEEGISAGGVMDVNTALQEVLK	Unambiguous	3	1	NP_001008435.1	N-Term(Acetyl)	CID	0.5429	0	1	1	105.13	4.74164e-10	0	0	22	2	1137.07	2273.13	0.00789192	138.899	16392	16392	MS2	29/218	170306_chiba_GST_02.raw
	High	aEEGISAGGVMDVNTALQEVLK	Unambiguous	3	1	NP_001008435.1	N-Term(Acetyl)	CID	0.5238	0	1	1	104.82	4.99359e-10	0	0	33	2	1137.07	2273.13	-0.421719	143.724	17002	17002	MS2	14/218	170306_chiba_GST_02.raw
	High	aEEGISAGGVMDVNTALQEVLK	Unambiguous	3	1	NP_001008435.1	N-Term(Acetyl)	CID	0.5143	0	1	1	104.67	4.89612e-10	0	5.86114	9	2	1137.07	2273.13	0.75971	119.765	13936	13936	MS2	14/218	170306_chiba_GST_02.raw
	High	aEEGISAGGVMDVNTALQEVLK	Unambiguous	3	1	NP_001008435.1	N-Term(Acetyl)	CID	0.5048	0	1	1	104.63	5.32021e-10	0	7.13748	18	2	1137.07	2273.13	0.00789192	131.644	15481	15481	MS2	14/218	170306_chiba_GST_02.raw
	High	aEEGISAGGVMDVNTALQEVLK	Unambiguous	3	1	NP_001008435.1	N-Term(Acetyl)	CID	0.5238	0	1	1	104.52	5.19179e-10	0	25.9988	17	2	1137.07	2273.13	0.652308	133.072	15661	15661	MS2	14/218	170306_chiba_GST_02.raw
	High	aEEGISAGGVMDVNTALQEVLK	Unambiguous	3	1	NP_001008435.1	N-Term(Acetyl)	CID	0.5481	0	1	1	103.61	6.5109e-10	0	13.4026	17	2	1137.07	2273.13	0.437503	122.799	14335	14335	MS2	15/218	170306_chiba_GST_02.raw
	High	aEEGISAGGVMDVNTALQEVLK	Unambiguous	3	1	NP_001008435.1	N-Term(Acetyl)	CID	0.5	0	1	1	102.49	8.45456e-10	0	27.9751	33	2	1137.07	2273.13	0.115295	134.167	15800	15800	MS2	14/218	170306_chiba_GST_02.raw
	High	aEEGISAGGVMDVNTALQEVLK	Unambiguous	3	1	NP_001008435.1	N-Term(Acetyl)	CID	0.5149	0	1	1	101.33	1.10063e-09	0	4.63852	0	2	1137.07	2273.13	0.437503	111.223	12808	12808	MS2	27/218	170306_chiba_GST_02.raw
	High	aEEGISAGGVMDVNTALQEVLK	Unambiguous	3	1	NP_001008435.1	N-Term(Acetyl)	CID	0.54	0	1	1	100.41	1.33302e-09	0	38.3256	18	2	1137.07	2273.13	0.3301	137.823	16258	16258	MS2	25/218	170306_chiba_GST_02.raw
	High	aEEGISAGGVMDVNTALQEVLK	Unambiguous	3	1	NP_001008435.1	N-Term(Acetyl)	CID	0.5	0	1	1	99.78	1.62528e-09	0	18.6365	13	2	1137.07	2273.13	-0.0995108	129.089	15155	15155	MS2	16/218	170306_chiba_GST_02.raw
	High	aEEGISAGGVMDVNTALQEVLK	Unambiguous	3	1	NP_001008435.1	N-Term(Acetyl)	CID	0.4747	0	1	1	99.1	1.81465e-09	0	9.05268	13	2	1137.07	2273.13	0.544905	128.011	15017	15017	MS2	28/218	170306_chiba_GST_02.raw
	High	aEEGISAGGVMDVNTALQEVLK	Unambiguous	3	1	NP_001008435.1	N-Term(Acetyl)	CID	0.4848	0	1	1	98.69	2.08895e-09	0	27.9423	18	2	1137.07	2273.13	0.00789192	132.007	15526	15526	MS2	24/218	170306_chiba_GST_02.raw
	High	aEEGISAGGVMDVNTALQEVLK	Unambiguous	3	1	NP_001008435.1	N-Term(Acetyl)	CID	0.596	0	1	1	98.54	2.09938e-09	0	27.428	12	2	1137.07	2273.13	0.115295	126.647	14840	14840	MS2	16/218	170306_chiba_GST_02.raw
	High	aEEGISAGGVMDVNTALQEVLK	Unambiguous	3	1	NP_001008435.1	N-Term(Acetyl)	CID	0.4184	0	1	1	98.07	2.29254e-09	0	20.9518	11	2	1137.07	2273.13	0.652308	118.982	13832	13832	MS2	27/218	170306_chiba_GST_02.raw
	High	aEEGISAGGVMDVNTALQEVLK	Unambiguous	3	1	NP_001008435.1	N-Term(Acetyl)	CID	0.5474	0	1	1	95.27	4.38321e-09	0	9.58863	1	2	1137.07	2273.13	0.544905	114.568	13251	13251	MS2	25/218	170306_chiba_GST_02.raw
	High	aEEGISAGGVMDVNTALQEVLK	Unambiguous	3	1	NP_001008435.1	N-Term(Acetyl)	CID	0.5	0	1	1	94.38	5.45307e-09	0	17.8809	17	2	1137.07	2273.13	0.437503	133.359	15698	15698	MS2	24/218	170306_chiba_GST_02.raw
	High	aEEGISAGGVMDVNTALQEVLK	Unambiguous	3	1	NP_001008435.1	N-Term(Acetyl)	CID	0.4894	0	1	1	93.78	6.17721e-09	0	24.91	14	2	1137.07	2273.13	0.544905	128.774	15114	15114	MS2	24/218	170306_chiba_GST_02.raw
	High	aEEGISAGGVMDVNTALQEVLK	Unambiguous	3	1	NP_001008435.1	N-Term(Acetyl)	CID	0.5638	0	1	1	93.69	6.39207e-09	0	27.7225	3	2	1137.07	2273.13	0.437503	116.157	13461	13461	MS2	25/218	170306_chiba_GST_02.raw
	High	aEEGISAGGVMDVNTALQEVLK	Unambiguous	3	1	NP_001008435.1	N-Term(Acetyl)	CID	0.5213	0	1	1	93.65	6.66697e-09	0	29.8559	39	2	1137.07	2273.13	0.00789192	144.726	17120	17120	MS2	16/218	170306_chiba_GST_02.raw
	High	aEEGISAGGVMDVNTALQEVLK	Unambiguous	3	1	NP_001008435.1	N-Term(Acetyl)	CID	0.6596	0	1	1	93.6	6.264e-09	0	31.3015	6	2	1137.07	2273.13	0.75971	117.19	13598	13598	MS2	16/218	170306_chiba_GST_02.raw
	High	aEEGISAGGVMDVNTALQEVLK	Unambiguous	3	1	NP_001008435.1	N-Term(Acetyl)	CID	0.4946	0	1	1	93.44	6.68024e-09	0	6.60425	8	2	1137.07	2273.13	0.544905	122.006	14230	14230	MS2	26/218	170306_chiba_GST_02.raw
	High	aEEGISAGGVMDVNTALQEVLK	Unambiguous	3	1	NP_001008435.1	N-Term(Acetyl)	CID	0.5435	0	1	1	92.01	9.25374e-09	0	21.6421	8	2	1137.07	2273.13	0.652308	123.235	14391	14391	MS2	29/218	170306_chiba_GST_02.raw
	High	aEEGISAGGVMDVNTALQEVLK	Unambiguous	3	1	NP_001008435.1	N-Term(Acetyl)	CID	0.413	0	1	1	91.9	9.74938e-09	0	32.572	3	2	1137.07	2273.14	0.867113	115.417	13364	13364	MS2	24/218	170306_chiba_GST_02.raw
	High	aEEGISAGGVMDVNTALQEVLK	Unambiguous	3	1	NP_001008435.1	N-Term(Acetyl)	CID	0.5652	0	1	1	91.72	1.0061e-08	0	13.5773	12	2	1137.07	2273.13	0.437503	125.981	14753	14753	MS2	26/218	170306_chiba_GST_02.raw
	High	aEEGISAGGVMDVNTALQEVLK	Unambiguous	3	1	NP_001008435.1	N-Term(Acetyl)	CID	0.4505	0	1	1	91.45	1.08138e-08	0	22.1102	9	2	1137.07	2273.13	-0.314316	125.676	14713	14713	MS2	23/218	170306_chiba_GST_02.raw
	High	LVEALCAEHQINLIK	Unambiguous	7	2	NP_001008435.1;XP_018096946.1		CID	1	0	1	1	90.74	1.04995e-08	0	5.5177	0	2	847.47	1693.93	0.840137	75.0784	7752	7752	MS2	22/132	170306_chiba_GST_02.raw
	High	aEEGISAGGVMDVNTALQEVLK	Unambiguous	3	1	NP_001008435.1	N-Term(Acetyl)	CID	0.5169	0	1	1	89.3	1.72122e-08	0	8.62753	0	2	1137.07	2273.13	0.3301	112.026	12914	12914	MS2	23/218	170306_chiba_GST_02.raw
	High	aEEGISAGGVMDVNTALQEVLK	Unambiguous	3	1	NP_001008435.1	N-Term(Acetyl)	CID	0.5862	0	1	1	87.16	2.91348e-08	0	18.7066	93	2	1137.07	2273.13	-0.529122	147.641	17407	17407	MS2	27/218	170306_chiba_GST_02.raw
	High	aEEGISAGGVMDVNTALQEVLK	Unambiguous	3	1	NP_001008435.1	N-Term(Acetyl)	CID	0.5747	0	1	1	87.06	2.94199e-08	0	12.078	5	2	1137.07	2273.13	0.437503	122.385	14280	14280	MS2	27/218	170306_chiba_GST_02.raw
	High	aEEGISAGGVMDVNTALQEVLK	Unambiguous	3	1	NP_001008435.1	N-Term(Acetyl)	CID	0.4828	0	1	1	86.7	3.22832e-08	0	35.9464	7	2	1137.07	2273.14	1.40413	120.252	14000	14000	MS2	28/218	170306_chiba_GST_02.raw
	High	aEEGISAGGVMDVNTALQEVLK	Unambiguous	3	1	NP_001008435.1	N-Term(Acetyl)	CID	0.4767	0	1	1	85.57	4.07678e-08	0	20.0046	16	2	1137.07	2273.13	0.652308	128.906	15131	15131	MS2	22/218	170306_chiba_GST_02.raw
	High	aEEGISAGGVMDVNTALQEVLK	Unambiguous	3	1	NP_001008435.1	N-Term(Acetyl)	CID	0.6386	0	1	1	83.44	6.65759e-08	0	19.2311	5	2	1137.07	2273.13	0.652308	116.506	13507	13507	MS2	26/218	170306_chiba_GST_02.raw
	High	aEEGISAGGVMDVNTALQEVLK	Unambiguous	3	1	NP_001008435.1	N-Term(Acetyl)	CID	0.5663	0	1	1	83.13	7.32043e-08	0	23.6368	11	2	1137.07	2273.13	0.222697	125.803	14730	14730	MS2	24/218	170306_chiba_GST_02.raw
	High	aEEGISAGGVMDVNTALQEVLK	Unambiguous	3	1	NP_001008435.1	N-Term(Acetyl)	CID	1	0	1	1	80.06	1.41531e-07	0	28.5956	6	2	1137.07	2273.13	0.75971	117.036	13578	13578	MS2	15/218	170306_chiba_GST_02.raw
	High	aEEGISAGGVMDVNTALQEVLK	Unambiguous	3	1	NP_001008435.1	N-Term(Acetyl)	CID	0.5	0	1	1	79.71	1.53409e-07	0	17.1517	100	2	1137.07	2273.13	0.75971	148.464	17479	17479	MS2	24/218	170306_chiba_GST_02.raw
	High	aEEGISAGGVMDVNTALQEVLK	Unambiguous	3	1	NP_001008435.1	N-Term(Acetyl)	CID	0.6	0	1	1	79.52	1.64179e-07	0	22.5682	4	2	1137.07	2273.13	0.652308	117.503	13639	13639	MS2	13/218	170306_chiba_GST_02.raw
	High	aEEGISAGGVMDVNTALQEVLK	Unambiguous	3	1	NP_001008435.1	N-Term(Acetyl)	CID	0.4744	0	1	1	77.72	2.52721e-07	0	25.0393	12	2	1137.07	2273.14	1.18932	124.569	14567	14567	MS2	14/218	170306_chiba_GST_02.raw
	High	aEEGISAGGVMDVNTALQEVLK	Unambiguous	3	1	NP_001008435.1	N-Term(Acetyl)	CID	0.36	0	1	1	74.9	4.83773e-07	0	2.33561	0	3	758.383	2273.13	0.431587	111.216	12807	12807	MS2	20/218	170306_chiba_GST_02.raw
	High	QAHLCVLASNCDEPMYVK	Unambiguous	7	2	NP_001008435.1;XP_018096946.1		CID	0.3467	0	1	1	74.64	3.16073e-07	0	0	1	2	1010.97	2020.93	1.20874	71.6157	7233	7233	MS2	11/178	170306_chiba_GST_02.raw
	High	LVEALCAEHQINLIK	Unambiguous	7	2	NP_001008435.1;XP_018096946.1		CID	1	0	1	1	73.71	5.02206e-07	0	6.7762	1	2	847.469	1693.93	0.551884	75.9975	7887	7887	MS2	11/132	170306_chiba_GST_02.raw
	High	aEEGISAGGVMDVNTALQEVLK	Unambiguous	3	1	NP_001008435.1	N-Term(Acetyl)	CID	0.3971	0	1	1	68.43	2.1317e-06	0	2.66511	0	3	758.383	2273.13	0.270483	110.43	12703	12703	MS2	23/218	170306_chiba_GST_02.raw
	High	aEEGISAGGVMDVNTALQEVLK	Unambiguous	3	1	NP_001008435.1	N-Term(Acetyl)	CID	0.5294	0	1	1	68.15	2.24304e-06	0	2.30138	0	2	1137.07	2273.13	0.3301	110.437	12704	12704	MS2	28/218	170306_chiba_GST_02.raw
	High	aEEGISAGGVMDVNTALQEVLK	Unambiguous	3	1	NP_001008435.1	N-Term(Acetyl)	CID	0.3846	0	1	1	65.01	4.73251e-06	0	16.6426	0	3	758.383	2273.13	0.189931	112.803	13018	13018	MS2	17/218	170306_chiba_GST_02.raw
	High	aEEGISAGGVMDVNTALQEVLK	Unambiguous	3	1	NP_001008435.1	N-Term(Acetyl)	CID	0.3175	0	1	1	62.77	7.84741e-06	0	17.5385	0	3	758.383	2273.13	0.270483	112.019	12913	12913	MS2	19/218	170306_chiba_GST_02.raw
	High	aEEGISAGGVMDVNTALQEVLK	Unambiguous	3	1	NP_001008435.1	N-Term(Acetyl)	CID	0.1786	0	1	1	56.04	3.67106e-05	0	38.1925	1	3	758.383	2273.13	0.592691	115.19	13334	13334	MS2	20/218	170306_chiba_GST_02.raw
	High	aEEGISAGGVMDVNTALQEVLK	Unambiguous	3	1	NP_001008435.1	N-Term(Acetyl)	CID	0.2182	0	1	1	54.54	5.41403e-05	0	18.88	1	3	758.382	2273.13	-0.132277	113.619	13125	13125	MS2	21/218	170306_chiba_GST_02.raw
	High	aEEGISAGGVMDVNTALQEVLK	Unambiguous	3	1	NP_001008435.1	N-Term(Acetyl)	CID	1	0	1	1	51.41	0.000109138	0	12.8171	54	2	1137.07	2273.13	-0.314316	140.748	16625	16625	MS2	23/218	170306_chiba_GST_02.raw
	High	LGEWVGLCK	Unambiguous	8	2	NP_001008435.1;XP_018096946.1		CID	1	0	1	1	50.43	0.000171183	0	2.77613	0	2	502.766	1004.52	0.306553	77.0393	8041	8041	MS2	5/64	170306_chiba_GST_02.raw
	High	aEEGISAGGVMDVNTALQEVLK	Unambiguous	3	1	NP_001008435.1	N-Term(Acetyl)	CID	1	0	1	1	46.84	0.000304311	0	33.0052	49	2	1137.07	2273.13	0.652308	136.179	16056	16056	MS2	19/218	170306_chiba_GST_02.raw
	High	aEEGISAGGVMDVNTALQEVLK	Unambiguous	3	1	NP_001008435.1	N-Term(Acetyl)	CID	1	0	1	1	46.43	0.000342402	0	30.0088	30	2	1137.07	2273.13	0.222697	131.346	15444	15444	MS2	24/218	170306_chiba_GST_02.raw
	High	aEEGISAGGVMDVNTALQEVLK	Unambiguous	3	1	NP_001008435.1	N-Term(Acetyl)	CID	1	0	1	1	45.62	0.000412607	0	23.6481	1	3	758.382	2273.13	-0.212829	115.859	13422	13422	MS2	19/218	170306_chiba_GST_02.raw
	High	aEEGISAGGVMDVNTALQEVLK	Unambiguous	3	1	NP_001008435.1	N-Term(Acetyl)	CID	0.1136	0	1	1	43.76	0.000616365	0	23.7455	1	3	758.383	2273.14	0.995451	114.418	13231	13231	MS2	17/218	170306_chiba_GST_02.raw
	High	DVIEEYFK	Unambiguous	6	2	NP_001008435.1;XP_018096946.1		CID	1	0	1	1	43.3	0.000348463	0	5.33895	0	2	521.758	1042.51	0.128193	78.3189	8230	8230	MS2	6/64	170306_chiba_GST_02.raw
	High	aEEGISAGGVMDVNTALQEVLK	Unambiguous	3	1	NP_001008435.1	N-Term(Acetyl)	CID	1	0	1	1	40.55	0.00132157	0	42.8098	5	3	758.383	2273.13	0.189931	129.656	15229	15229	MS2	20/218	170306_chiba_GST_02.raw
	High	LVEALCAEHQINLIK	Unambiguous	7	2	NP_001008435.1;XP_018096946.1		CID	1	0	1	1	40.49	0.00111217	0	13.1007	0	3	565.316	1693.93	0.86823	75.0389	7746	7746	MS2	19/132	170306_chiba_GST_02.raw
	High	aEEGISAGGVMDVNTALQEVLK	Unambiguous	3	1	NP_001008435.1	N-Term(Acetyl)	CID	1	0	1	1	39.26	0.00177865	0	34.8047	2	3	758.383	2273.13	0.109379	116.321	13483	13483	MS2	20/218	170306_chiba_GST_02.raw
	High	TALIHDGLAR	Unambiguous	7	2	NP_001008435.1;XP_018096946.1		CID	1	0	1	1	37.67	0.00125686	0	2.02042	0	2	533.804	1066.6	0.656776	47.3752	3439	3439	MS2	7/82	170306_chiba_GST_02.raw
	High	aEEGISAGGVMDVNTALQEVLK	Unambiguous	3	1	NP_001008435.1	N-Term(Acetyl)	CID	1	0	1	1	34.62	0.00509087	0	41.0547	5	3	758.383	2273.13	0.512139	142.145	16800	16800	MS2	18/218	170306_chiba_GST_02.raw
	High	aEEGISAGGVMDVNTALQEVLK	Unambiguous	3	1	NP_001008435.1	N-Term(Acetyl)	CID	1	0	1	1	33.85	0.00618146	0	51.2995	6	3	758.383	2273.13	0.109379	135.782	16005	16005	MS2	19/218	170306_chiba_GST_02.raw
	High	aEEGISAGGVMDVNTALQEVLK	Unambiguous	3	1	NP_001008435.1	N-Term(Acetyl)	CID	1	0	1	1	33.73	0.00599455	0	51.952	5	3	758.383	2273.13	0.351035	120.811	14074	14074	MS2	19/218	170306_chiba_GST_02.raw
	High	aEEGISAGGVMDVNTALQEVLK	Unambiguous	3	1	NP_001008435.1	N-Term(Acetyl)	CID	1	0	1	1	33.04	0.00747371	0	39.4662	81	3	758.382	2273.13	-0.212829	148.282	17464	17464	MS2	20/218	170306_chiba_GST_02.raw
	High	DVIEEYFK	Unambiguous	6	2	NP_001008435.1;XP_018096946.1		CID	1	0	1	1	32.55	0.00344661	0	9.30107	0	2	521.759	1042.51	0.596564	79.2481	8364	8364	MS2	8/64	170306_chiba_GST_02.raw
	High	aEEGISAGGVMDVNTALQEVLK	Unambiguous	3	1	NP_001008435.1	N-Term(Acetyl)	CID	1	0	1	1	32.19	0.00890824	0	37.1662	51	3	758.383	2273.13	0.512139	147.751	17418	17418	MS2	19/218	170306_chiba_GST_02.raw
	High	aEEGISAGGVMDVNTALQEVLK	Unambiguous	3	1	NP_001008435.1	N-Term(Acetyl)	CID	0.0938	0	1	1	31.54	0.0103465	0	40.649	2	3	758.383	2273.13	0.592691	117.912	13692	13692	MS2	18/218	170306_chiba_GST_02.raw
	High	aEEGISAGGVMDVNTALQEVLK	Unambiguous	3	1	NP_001008435.1	N-Term(Acetyl)	CID	1	0	1	1	30.62	0.0129611	0	40.2131	16	3	758.383	2273.14	1.23711	145.798	17226	17226	MS2	16/218	170306_chiba_GST_02.raw
	High	aEEGISAGGVMDVNTALQEVLK	Unambiguous	3	1	NP_001008435.1	N-Term(Acetyl)	CID	1	0	1	1	28.69	0.0202811	0	31.2498	5	3	758.383	2273.13	0.189931	131.969	15521	15521	MS2	20/218	170306_chiba_GST_02.raw
NP_001085921.1	ribosomal protein L23 L homeolog [Xenopus laevis]	6276.42	57.14	2	6	6	104	140	14.842	10.5063
	Confidence Level	Sequence	PSM Ambiguity	# Proteins	# Protein Groups	Protein Group Accessions	Modifications	Activation Type	ΔScore	ΔCn	Rank	Search Engine Rank	IonScore	Exp Value	# Missed Cleavages	Isolation Interference [%]	Ion Inject Time [ms]	Charge	m/z [Da]	MH+ [Da]	ΔM [ppm]	RT [min]	First Scan	Last Scan	MS Order	Ions Matched	Spectrum File
	High	DGVFLYFEDNAGVIVNNK	Unambiguous	2	1	NP_001085921.1		CID	1	0	1	1	133.57	7.80186e-13	0	0	11	2	1007.5	2013.99	0.376337	133.608	15730	15730	MS2	14/168	170306_chiba_GST_02.raw
	High	DGVFLYFEDNAGVIVNNK	Unambiguous	2	1	NP_001085921.1		CID	1	0	1	1	133	9.54762e-13	0	27.3174	10	2	1007.5	2013.99	0.740003	136.076	16043	16043	MS2	25/168	170306_chiba_GST_02.raw
	High	DGVFLYFEDNAGVIVNNK	Unambiguous	2	1	NP_001085921.1		CID	1	0	1	1	123.82	7.90487e-12	0	13.0105	7	2	1007.5	2013.99	0.740003	128.324	15057	15057	MS2	24/168	170306_chiba_GST_02.raw
	High	DGVFLYFEDNAGVIVNNK	Unambiguous	2	1	NP_001085921.1		CID	1	0	1	1	117.41	3.45856e-11	0	12.6727	4	2	1007.5	2013.99	0.800614	116.142	13459	13459	MS2	14/168	170306_chiba_GST_02.raw
	High	DGVFLYFEDNAGVIVNNK	Unambiguous	2	1	NP_001085921.1		CID	1	0	1	1	114.21	6.63801e-11	0	30.6445	11	2	1007.5	2013.99	0.0126701	132.805	15627	15627	MS2	23/168	170306_chiba_GST_02.raw
	High	DGVFLYFEDNAGVIVNNK	Unambiguous	2	1	NP_001085921.1		CID	1	0	1	1	112.41	1.01906e-10	0	20.409	4	2	1007.5	2013.99	0.497559	114.621	13258	13258	MS2	14/168	170306_chiba_GST_02.raw
	High	DGVFLYFEDNAGVIVNNK	Unambiguous	2	1	NP_001085921.1		CID	1	0	1	1	108.54	2.48427e-10	0	34.5079	9	2	1007.5	2013.99	0.376337	142.153	16801	16801	MS2	22/168	170306_chiba_GST_02.raw
	High	DGVFLYFEDNAGVIVNNK	Unambiguous	2	1	NP_001085921.1		CID	1	0	1	1	107.22	3.31924e-10	0	44.0587	1	2	1007.5	2013.99	-0.108552	102.134	11578	11578	MS2	14/168	170306_chiba_GST_02.raw
	High	DGVFLYFEDNAGVIVNNK	Unambiguous	2	1	NP_001085921.1		CID	1	0	1	1	106.2	4.12599e-10	0	11.6878	2	2	1007.5	2013.99	0.255115	101.358	11473	11473	MS2	24/168	170306_chiba_GST_02.raw
	High	DGVFLYFEDNAGVIVNNK	Unambiguous	2	1	NP_001085921.1		CID	1	0	1	1	105.19	5.76627e-10	0	25.0057	18	2	1007.5	2013.99	0.800614	138.145	16298	16298	MS2	22/168	170306_chiba_GST_02.raw
	High	ISLGLPVGAVINCADNTGGK	Unambiguous	1	1	NP_001085921.1		CID	1	0	1	1	105.11	3.34526e-10	0	10.1017	2	2	950.004	1899	0.0024118	90.0108	9903	9903	MS2	24/198	170306_chiba_GST_02.raw
	High	ISLGLPVGAVINCADNTGGK	Unambiguous	1	1	NP_001085921.1		CID	1	0	1	1	104.36	3.97585e-10	0	2.14657	0	2	950.004	1899	-0.126151	90.6659	9993	9993	MS2	23/198	170306_chiba_GST_02.raw
	High	DGVFLYFEDNAGVIVNNK	Unambiguous	2	1	NP_001085921.1		CID	1	0	1	1	99.94	1.84532e-09	0	21.3844	59	2	1007.5	2013.99	1.34611	146.68	17308	17308	MS2	23/168	170306_chiba_GST_02.raw
	High	DGVFLYFEDNAGVIVNNK	Unambiguous	2	1	NP_001085921.1		CID	1	0	1	1	97.45	3.14802e-09	0	39.1999	22	2	1007.5	2013.99	0.0126701	143.804	17011	17011	MS2	12/168	170306_chiba_GST_02.raw
	High	DGVFLYFEDNAGVIVNNK	Unambiguous	2	1	NP_001085921.1		CID	1	0	1	1	96.61	4.1581e-09	0	58.9924	14	2	1007.5	2013.99	0.800614	142.57	16855	16855	MS2	21/168	170306_chiba_GST_02.raw
	High	DGVFLYFEDNAGVIVNNK	Unambiguous	2	1	NP_001085921.1		CID	1	0	1	1	95.67	5.16292e-09	0	50.0016	2	2	1007.5	2013.99	0.800614	112.84	13023	13023	MS2	21/168	170306_chiba_GST_02.raw
	High	LPAAGVGDMVMATVK	Unambiguous	2	1	NP_001085921.1		CID	1	0	1	1	94.4	9.0588e-09	0	29.0159	1	2	730.386	1459.77	0.485851	83.1698	8935	8935	MS2	13/122	170306_chiba_GST_02.raw
	High	DGVFLYFEDNAGVIVNNK	Unambiguous	2	1	NP_001085921.1		CID	1	0	1	1	94.4	6.04525e-09	0	27.73	18	2	1007.5	2013.99	-0.169163	141.155	16675	16675	MS2	27/168	170306_chiba_GST_02.raw
	High	LPAAGVGDMVMATVK	Unambiguous	2	1	NP_001085921.1		CID	1	0	1	1	93.74	1.00595e-08	0	0	0	2	730.386	1459.76	-0.0995118	81.3775	8674	8674	MS2	11/122	170306_chiba_GST_02.raw
	High	DGVFLYFEDNAGVIVNNK	Unambiguous	2	1	NP_001085921.1		CID	1	0	1	1	93.54	7.30271e-09	0	41.4878	23	2	1007.5	2013.99	1.40672	142.381	16830	16830	MS2	16/168	170306_chiba_GST_02.raw
	High	DGVFLYFEDNAGVIVNNK	Unambiguous	2	1	NP_001085921.1		CID	1	0	1	1	93.4	8.70753e-09	0	21.9102	6	2	1007.5	2013.99	0.740003	134.436	15833	15833	MS2	16/168	170306_chiba_GST_02.raw
	High	DGVFLYFEDNAGVIVNNK	Unambiguous	2	1	NP_001085921.1		CID	1	0	1	1	93.28	8.95148e-09	0	17.4424	11	2	1007.5	2013.99	0.740003	140.4	16581	16581	MS2	16/168	170306_chiba_GST_02.raw
	High	DGVFLYFEDNAGVIVNNK	Unambiguous	2	1	NP_001085921.1		CID	1	0	1	1	93.27	8.97212e-09	0	26.8736	8	2	1007.5	2013.99	0.921836	139.789	16505	16505	MS2	16/168	170306_chiba_GST_02.raw
	High	DGVFLYFEDNAGVIVNNK	Unambiguous	2	1	NP_001085921.1		CID	1	0	1	1	93.04	9.48491e-09	0	20.254	4	2	1007.5	2013.99	0.679392	118.583	13778	13778	MS2	14/168	170306_chiba_GST_02.raw
	High	DGVFLYFEDNAGVIVNNK	Unambiguous	2	1	NP_001085921.1		CID	1	0	1	1	92.25	1.04241e-08	0	15.4653	2	2	1007.5	2013.99	0.0126701	110.382	12697	12697	MS2	14/168	170306_chiba_GST_02.raw
	High	DGVFLYFEDNAGVIVNNK	Unambiguous	2	1	NP_001085921.1		CID	1	0	1	1	92.19	1.07201e-08	0	10.3708	6	2	1007.5	2013.99	0.436948	130.76	15371	15371	MS2	14/168	170306_chiba_GST_02.raw
	High	DGVFLYFEDNAGVIVNNK	Unambiguous	2	1	NP_001085921.1		CID	1	0	1	1	90.37	1.63004e-08	0	20.9869	3	2	1007.5	2013.99	0.376337	113.837	13154	13154	MS2	14/168	170306_chiba_GST_02.raw
	High	DGVFLYFEDNAGVIVNNK	Unambiguous	2	1	NP_001085921.1		CID	1	0	1	1	90.37	1.74024e-08	0	50.9235	6	2	1007.5	2013.99	0.55817	125.901	14743	14743	MS2	13/168	170306_chiba_GST_02.raw
	High	DGVFLYFEDNAGVIVNNK	Unambiguous	2	1	NP_001085921.1		CID	1	0	1	1	89.87	1.83924e-08	0	23.3093	1	2	1007.5	2013.99	0.315726	97.5256	10948	10948	MS2	24/168	170306_chiba_GST_02.raw
	High	DGVFLYFEDNAGVIVNNK	Unambiguous	2	1	NP_001085921.1		CID	1	0	1	1	89.25	2.27004e-08	0	27.5623	16	2	1007.5	2013.99	0.679392	140.221	16558	16558	MS2	10/168	170306_chiba_GST_02.raw
	High	DGVFLYFEDNAGVIVNNK	Unambiguous	2	1	NP_001085921.1		CID	1	0	1	1	89.08	2.35448e-08	0	25.6817	3	2	1007.5	2013.99	0.921836	117.747	13670	13670	MS2	10/168	170306_chiba_GST_02.raw
	High	DGVFLYFEDNAGVIVNNK	Unambiguous	2	1	NP_001085921.1		CID	1	0	1	1	88.88	2.46544e-08	0	27.2089	2	2	1007.5	2013.99	0.740003	109.704	12606	12606	MS2	16/168	170306_chiba_GST_02.raw
	High	DGVFLYFEDNAGVIVNNK	Unambiguous	2	1	NP_001085921.1		CID	1	0	1	1	88.36	2.50916e-08	0	22.7877	2	2	1007.5	2013.99	0.194503	110.022	12649	12649	MS2	14/168	170306_chiba_GST_02.raw
	High	DGVFLYFEDNAGVIVNNK	Unambiguous	2	1	NP_001085921.1		CID	1	0	1	1	88.07	2.69023e-08	0	29.3577	9	2	1007.5	2013.99	0.0732812	141.314	16695	16695	MS2	16/168	170306_chiba_GST_02.raw
	High	DGVFLYFEDNAGVIVNNK	Unambiguous	2	1	NP_001085921.1		CID	1	0	1	1	87.93	3.06828e-08	0	29.3432	10	2	1007.5	2013.99	0.800614	135.75	16001	16001	MS2	13/168	170306_chiba_GST_02.raw
	High	DGVFLYFEDNAGVIVNNK	Unambiguous	2	1	NP_001085921.1		CID	1	0	1	1	87.92	2.7767e-08	0	14.3487	4	2	1007.5	2013.99	0.255115	126.713	14848	14848	MS2	13/168	170306_chiba_GST_02.raw
	High	DGVFLYFEDNAGVIVNNK	Unambiguous	2	1	NP_001085921.1		CID	1	0	1	1	87.88	2.80239e-08	0	37.312	10	2	1007.5	2013.99	0.255115	132.955	15646	15646	MS2	13/168	170306_chiba_GST_02.raw
	High	DGVFLYFEDNAGVIVNNK	Unambiguous	2	1	NP_001085921.1		CID	1	0	1	1	87.25	3.36231e-08	0	30.795	3	2	1007.5	2013.99	0.315726	116.839	13552	13552	MS2	14/168	170306_chiba_GST_02.raw
	High	DGVFLYFEDNAGVIVNNK	Unambiguous	2	1	NP_001085921.1		CID	1	0	1	1	85.91	4.88534e-08	0	19.5682	4	2	1007.5	2013.99	0.921836	124.764	14593	14593	MS2	14/168	170306_chiba_GST_02.raw
	High	LPAAGVGDMVMATVK	Unambiguous	2	1	NP_001085921.1		CID	1	0	1	1	84.44	9.24556e-08	0	14.0512	0	2	730.386	1459.77	0.151358	82.2571	8803	8803	MS2	12/122	170306_chiba_GST_02.raw
	High	DGVFLYFEDNAGVIVNNK	Unambiguous	2	1	NP_001085921.1		CID	1	0	1	1	83.83	7.88669e-08	0	16.7942	15	2	1007.5	2013.99	0.861225	134.96	15900	15900	MS2	26/168	170306_chiba_GST_02.raw
	High	DGVFLYFEDNAGVIVNNK	Unambiguous	2	1	NP_001085921.1		CID	1	0	1	1	83.6	7.50807e-08	0	20.7762	6	2	1007.5	2013.99	0.194503	129.953	15268	15268	MS2	23/168	170306_chiba_GST_02.raw
	High	DGVFLYFEDNAGVIVNNK	Unambiguous	2	1	NP_001085921.1		CID	1	0	1	1	83.48	7.71842e-08	0	33.7578	21	2	1007.5	2013.99	0.194503	138.493	16341	16341	MS2	16/168	170306_chiba_GST_02.raw
	High	DGVFLYFEDNAGVIVNNK	Unambiguous	2	1	NP_001085921.1		CID	1	0	1	1	83.34	8.66646e-08	0	23.1986	3	2	1007.5	2013.99	1.2855	116.99	13572	13572	MS2	16/168	170306_chiba_GST_02.raw
	High	DGVFLYFEDNAGVIVNNK	Unambiguous	2	1	NP_001085921.1		CID	1	0	1	1	83.33	8.80256e-08	0	15.0226	3	2	1007.5	2013.99	0.982447	121.579	14174	14174	MS2	16/168	170306_chiba_GST_02.raw
	High	DGVFLYFEDNAGVIVNNK	Unambiguous	2	1	NP_001085921.1		CID	1	0	1	1	83.29	8.88401e-08	0	19.0949	5	2	1007.5	2013.99	0.618781	127.5	14950	14950	MS2	13/168	170306_chiba_GST_02.raw
	High	DGVFLYFEDNAGVIVNNK	Unambiguous	2	1	NP_001085921.1		CID	1	0	1	1	80.33	1.75634e-07	0	23.5091	8	2	1007.5	2013.99	0.55817	135.289	15941	15941	MS2	26/168	170306_chiba_GST_02.raw
	High	DGVFLYFEDNAGVIVNNK	Unambiguous	2	1	NP_001085921.1		CID	1	0	1	1	80.29	1.66035e-07	0	43.4574	2	2	1007.5	2013.99	0.376337	96.0316	10740	10740	MS2	13/168	170306_chiba_GST_02.raw
	High	DGVFLYFEDNAGVIVNNK	Unambiguous	2	1	NP_001085921.1		CID	1	0	1	1	79.96	1.92767e-07	0	26.6817	4	2	1007.5	2013.99	0.679392	118.787	13806	13806	MS2	14/168	170306_chiba_GST_02.raw
	High	DGVFLYFEDNAGVIVNNK	Unambiguous	2	1	NP_001085921.1		CID	1	0	1	1	79.96	1.88226e-07	0	12.8232	3	2	1007.5	2013.99	1.10367	110.872	12762	12762	MS2	21/168	170306_chiba_GST_02.raw
	High	DGVFLYFEDNAGVIVNNK	Unambiguous	2	1	NP_001085921.1		CID	1	0	1	1	79.84	1.78455e-07	0	27.7585	44	2	1007.5	2013.99	0.255115	143.995	17035	17035	MS2	14/168	170306_chiba_GST_02.raw
	High	DGVFLYFEDNAGVIVNNK	Unambiguous	2	1	NP_001085921.1		CID	1	0	1	1	79.7	2.04124e-07	0	40.1391	3	2	1007.5	2013.99	0.861225	109.218	12540	12540	MS2	23/168	170306_chiba_GST_02.raw
	High	DGVFLYFEDNAGVIVNNK	Unambiguous	2	1	NP_001085921.1		CID	1	0	1	1	79.66	2.04932e-07	0	32.944	7	2	1007.5	2013.99	0.55817	132.447	15582	15582	MS2	23/168	170306_chiba_GST_02.raw
	High	DGVFLYFEDNAGVIVNNK	Unambiguous	2	1	NP_001085921.1		CID	1	0	1	1	79.35	2.20095e-07	0	4.45545	7	2	1007.5	2013.99	0.55817	131.612	15477	15477	MS2	22/168	170306_chiba_GST_02.raw
	High	DGVFLYFEDNAGVIVNNK	Unambiguous	2	1	NP_001085921.1		CID	1	0	1	1	79.18	2.07744e-07	0	19.6371	5	2	1007.5	2013.99	0.194503	124.015	14494	14494	MS2	25/168	170306_chiba_GST_02.raw
	High	DGVFLYFEDNAGVIVNNK	Unambiguous	2	1	NP_001085921.1		CID	1	0	1	1	79.14	2.32218e-07	0	16.5586	4	2	1007.5	2013.99	0.861225	122.377	14279	14279	MS2	13/168	170306_chiba_GST_02.raw
	High	DGVFLYFEDNAGVIVNNK	Unambiguous	2	1	NP_001085921.1		CID	1	0	1	1	79.13	2.31531e-07	0	12.6998	4	2	1007.5	2013.99	0.618781	123.182	14384	14384	MS2	15/168	170306_chiba_GST_02.raw
	High	DGVFLYFEDNAGVIVNNK	Unambiguous	2	1	NP_001085921.1		CID	1	0	1	1	79.06	2.36535e-07	0	15.9946	5	2	1007.5	2013.99	0.921836	129.143	15162	15162	MS2	15/168	170306_chiba_GST_02.raw
	High	DGVFLYFEDNAGVIVNNK	Unambiguous	2	1	NP_001085921.1		CID	1	0	1	1	77.46	3.40102e-07	0	33.4365	4	2	1007.5	2013.99	0.55817	121.101	14112	14112	MS2	25/168	170306_chiba_GST_02.raw
	High	LPAAGVGDMVMATVK	Unambiguous	2	1	NP_001085921.1		CID	1	0	1	1	77.22	4.87453e-07	0	24.9741	1	2	730.386	1459.77	0.234981	80.6154	8563	8563	MS2	12/122	170306_chiba_GST_02.raw
	High	DGVFLYFEDNAGVIVNNK	Unambiguous	2	1	NP_001085921.1		CID	1	0	1	1	77.18	3.34995e-07	0	43.0012	4	2	1007.5	2013.99	-0.108552	125.567	14699	14699	MS2	14/168	170306_chiba_GST_02.raw
	High	DGVFLYFEDNAGVIVNNK	Unambiguous	2	1	NP_001085921.1		CID	1	0	1	1	77.07	3.48496e-07	0	13.53	7	2	1007.5	2013.99	0.497559	137.815	16257	16257	MS2	20/168	170306_chiba_GST_02.raw
	High	DGVFLYFEDNAGVIVNNK	Unambiguous	2	1	NP_001085921.1		CID	1	0	1	1	76.72	4.03282e-07	0	28.5754	2	2	1007.5	2013.99	0.618781	108.134	12395	12395	MS2	9/168	170306_chiba_GST_02.raw
	High	DGVFLYFEDNAGVIVNNK	Unambiguous	2	1	NP_001085921.1		CID	1	0	1	1	76.64	3.73929e-07	0	41.6179	25	2	1007.5	2013.99	0.133892	139.645	16487	16487	MS2	14/168	170306_chiba_GST_02.raw
	High	LPAAGVGDMVmATVK	Unambiguous	2	1	NP_001085921.1	M11(Oxidation)	CID	0.3117	0	1	1	76.57	5.00064e-07	0	24.6767	2	2	738.384	1475.76	0.534874	71.5209	7219	7219	MS2	12/122	170306_chiba_GST_02.raw
	High	DGVFLYFEDNAGVIVNNK	Unambiguous	2	1	NP_001085921.1		CID	1	0	1	1	75.33	5.05579e-07	0	25.2312	9	2	1007.5	2013.99	0.0732812	136.963	16152	16152	MS2	14/168	170306_chiba_GST_02.raw
	High	DGVFLYFEDNAGVIVNNK	Unambiguous	2	1	NP_001085921.1		CID	1	0	1	1	75.13	5.8158e-07	0	25.7868	100	2	1007.5	2013.99	0.55817	146.444	17286	17286	MS2	14/168	170306_chiba_GST_02.raw
	High	DGVFLYFEDNAGVIVNNK	Unambiguous	2	1	NP_001085921.1		CID	1	0	1	1	74.93	5.67211e-07	0	40.9772	15	2	1007.5	2013.99	-0.290386	138.826	16383	16383	MS2	13/168	170306_chiba_GST_02.raw
	High	DGVFLYFEDNAGVIVNNK	Unambiguous	2	1	NP_001085921.1		CID	1	0	1	1	74.54	6.2402e-07	0	42.7028	1	2	1007.5	2013.99	0.436948	107.367	12289	12289	MS2	15/168	170306_chiba_GST_02.raw
	High	DGVFLYFEDNAGVIVNNK	Unambiguous	2	1	NP_001085921.1		CID	1	0	1	1	73.01	1.08007e-06	0	18.1827	6	2	1007.5	2013.99	-0.654053	142.712	16874	16874	MS2	23/168	170306_chiba_GST_02.raw
	High	DGVFLYFEDNAGVIVNNK	Unambiguous	2	1	NP_001085921.1		CID	1	0	1	1	71.6	1.3214e-06	0	6.81694	3	2	1007.5	2013.99	0.679392	115.402	13362	13362	MS2	14/168	170306_chiba_GST_02.raw
	High	LPAAGVGDMVmATVK	Unambiguous	2	1	NP_001085921.1	M11(Oxidation)	CID	0.2958	0	1	1	71.06	1.6452e-06	0	13.5036	1	2	738.384	1475.76	0.783024	71.1745	7167	7167	MS2	12/122	170306_chiba_GST_02.raw
	High	DGVFLYFEDNAGVIVNNK	Unambiguous	2	1	NP_001085921.1		CID	1	0	1	1	69.43	2.02394e-06	0	43.9436	1	2	1007.5	2013.99	0.376337	105.356	12014	12014	MS2	14/168	170306_chiba_GST_02.raw
	High	DGVFLYFEDNAGVIVNNK	Unambiguous	2	1	NP_001085921.1		CID	1	0	1	1	68.83	2.29107e-06	0	42.2734	2	2	1007.5	2013.99	0.0126701	108.921	12500	12500	MS2	20/168	170306_chiba_GST_02.raw
	High	DGVFLYFEDNAGVIVNNK	Unambiguous	2	1	NP_001085921.1		CID	1	0	1	1	67	3.43185e-06	0	19.2132	8	2	1007.5	2013.99	0.255115	138.961	16400	16400	MS2	14/168	170306_chiba_GST_02.raw
	High	DGVFLYFEDNAGVIVNNK	Unambiguous	2	1	NP_001085921.1		CID	1	0	1	1	66.07	4.25137e-06	0	24.4039	100	2	1007.5	2013.99	0.255115	148.235	17460	17460	MS2	14/168	170306_chiba_GST_02.raw
	High	DGVFLYFEDNAGVIVNNK	Unambiguous	2	1	NP_001085921.1		CID	1	0	1	1	65.84	4.93866e-06	0	38.4078	100	2	1007.5	2013.99	0.55817	149.89	17596	17596	MS2	13/168	170306_chiba_GST_02.raw
	High	LPAAGVGDMVMATVK	Unambiguous	2	1	NP_001085921.1		CID	1	0	1	1	64.31	9.52649e-06	0	34.6738	1	2	730.386	1459.76	0.0677348	85.1165	9212	9212	MS2	24/122	170306_chiba_GST_02.raw
	High	ISLGLPVGAVINCADNTGGK	Unambiguous	1	1	NP_001085921.1		CID	1	0	1	1	63.99	4.32942e-06	0	10.3287	1	3	633.672	1899	-0.197513	90.8511	10019	10019	MS2	22/198	170306_chiba_GST_02.raw
	High	LPAAGVGDMVmATVK	Unambiguous	2	1	NP_001085921.1	M11(Oxidation)	CID	0.3333	0	1	1	63.04	1.12478e-05	0	44.5691	1	2	738.384	1475.76	0.286723	71.6308	7235	7235	MS2	13/122	170306_chiba_GST_02.raw
	High	DGVFLYFEDNAGVIVNNK	Unambiguous	2	1	NP_001085921.1		CID	1	0	1	1	63	8.94619e-06	0	17.6127	1	2	1007.5	2013.99	0.315726	106.186	12127	12127	MS2	22/168	170306_chiba_GST_02.raw
	High	ISLGLPVGAVINCADNTGGK	Unambiguous	1	1	NP_001085921.1		CID	1	0	1	1	57.89	1.96691e-05	0	11.698	0	3	633.672	1899	0.477441	90.0664	9910	9910	MS2	20/198	170306_chiba_GST_02.raw
	High	GSAITGPVAK	Unambiguous	2	1	NP_001085921.1		CID	1	0	1	1	56.25	4.11433e-05	0	6.18178	0	2	450.761	900.515	0.0443213	44.8336	3019	3019	MS2	11/78	170306_chiba_GST_02.raw
	High	LPAAGVGDMVMATVK	Unambiguous	2	1	NP_001085921.1		CID	1	0	1	1	56.09	6.32314e-05	0	30.0236	1	2	730.386	1459.77	0.318605	83.9523	9046	9046	MS2	10/122	170306_chiba_GST_02.raw
	High	DGVFLYFEDNAGVIVNNK	Unambiguous	2	1	NP_001085921.1		CID	1	0	1	1	54.74	5.53967e-05	0	52.3314	1	2	1007.5	2013.99	1.46734	105.179	11989	11989	MS2	20/168	170306_chiba_GST_02.raw
	High	LPAAGVGDMVMATVK	Unambiguous	2	1	NP_001085921.1		CID	1	0	1	1	52.58	0.00011566	0	31.9228	100	2	730.387	1459.77	1.7402	147.83	17424	17424	MS2	12/122	170306_chiba_GST_02.raw
	High	DGVFLYFEDNAGVIVNNK	Unambiguous	2	1	NP_001085921.1		CID	1	0	1	1	48.7	0.000239441	0	6.96657	3	2	1007.5	2013.99	0.436948	110.972	12775	12775	MS2	26/168	170306_chiba_GST_02.raw
	High	LPAAGVGDMVMATVK	Unambiguous	2	1	NP_001085921.1		CID	1	0	1	1	47.55	0.000451786	0	9.96765	0	3	487.26	1459.76	-0.00419401	80.658	8569	8569	MS2	8/122	170306_chiba_GST_02.raw
	High	DGVFLYFEDNAGVIVNNK	Unambiguous	2	1	NP_001085921.1		CID	1	0	1	1	44.45	0.000653238	0	22.1616	7	2	1007.5	2013.99	1.34611	114.446	13235	13235	MS2	13/168	170306_chiba_GST_02.raw
	High	DGVFLYFEDNAGVIVNNK	Unambiguous	2	1	NP_001085921.1		CID	1	0	1	1	43	0.000917173	0	45.9579	10	3	672.002	2013.99	0.521188	126.462	14816	14816	MS2	11/168	170306_chiba_GST_02.raw
	High	DGVFLYFEDNAGVIVNNK	Unambiguous	2	1	NP_001085921.1		CID	1	0	1	1	40.1	0.00178834	0	45.0551	16	3	672.002	2013.99	0.521188	134.474	15838	15838	MS2	15/168	170306_chiba_GST_02.raw
	High	NLYIISVK	Unambiguous	2	1	NP_001085921.1		CID	1	0	1	1	39.74	0.000950218	0	8.69836	0	2	475.29	949.572	0.623358	72.8108	7415	7415	MS2	6/70	170306_chiba_GST_02.raw
	High	DGVFLYFEDNAGVIVNNK	Unambiguous	2	1	NP_001085921.1		CID	1	0	1	1	39.68	0.00205605	0	37.5793	5	3	672.003	2013.99	0.703021	115.773	13411	13411	MS2	15/168	170306_chiba_GST_02.raw
	High	DGVFLYFEDNAGVIVNNK	Unambiguous	2	1	NP_001085921.1		CID	1	0	1	1	38.08	0.00294855	0	26.224	5	2	1007.5	2013.99	0.982447	95.9225	10725	10725	MS2	20/168	170306_chiba_GST_02.raw
	High	DGVFLYFEDNAGVIVNNK	Unambiguous	2	1	NP_001085921.1		CID	1	0	1	1	36.42	0.00435545	0	31.2048	5	3	672.003	2013.99	0.703021	114.673	13265	13265	MS2	17/168	170306_chiba_GST_02.raw
	High	DGVFLYFEDNAGVIVNNK	Unambiguous	2	1	NP_001085921.1		CID	1	0	1	1	35.53	0.00534605	0	35.261	8	3	672.003	2013.99	0.703021	127.891	15001	15001	MS2	16/168	170306_chiba_GST_02.raw
	High	DGVFLYFEDNAGVIVNNK	Unambiguous	2	1	NP_001085921.1		CID	1	0	1	1	34.49	0.00634802	0	34.3278	8	3	672.002	2013.99	0.339355	125.956	14750	14750	MS2	14/168	170306_chiba_GST_02.raw
	High	DGVFLYFEDNAGVIVNNK	Unambiguous	2	1	NP_001085921.1		CID	1	0	1	1	33.2	0.00871107	0	45.4277	12	3	672.002	2013.99	-0.297062	126.82	14862	14862	MS2	21/168	170306_chiba_GST_02.raw
	High	DGVFLYFEDNAGVIVNNK	Unambiguous	2	1	NP_001085921.1		CID	1	0	1	1	31.56	0.0133362	0	60.5077	4	3	672.003	2013.99	0.703021	118.613	13782	13782	MS2	19/168	170306_chiba_GST_02.raw
	High	DGVFLYFEDNAGVIVNNK	Unambiguous	2	1	NP_001085921.1		CID	1	0	1	1	30.25	0.0168515	0	34.3688	12	3	672.002	2013.99	0.339355	134.805	15880	15880	MS2	9/168	170306_chiba_GST_02.raw
	High	DGVFLYFEDNAGVIVNNK	Unambiguous	2	1	NP_001085921.1		CID	1	0	1	1	30.21	0.0181984	0	44.859	9	3	672.003	2013.99	0.703021	123.893	14479	14479	MS2	15/168	170306_chiba_GST_02.raw
	High	DGVFLYFEDNAGVIVNNK	Unambiguous	2	1	NP_001085921.1		CID	1	0	1	1	29.69	0.0202447	0	32.362	7	3	672.003	2013.99	1.24852	121.328	14142	14142	MS2	21/168	170306_chiba_GST_02.raw
	High	KVHPAVVIR	Unambiguous	2	1	NP_001085921.1		CID	1	0	1	1	28.61	0.00206581	1	31.4423	1	2	509.83	1018.65	0.0843351	43.5387	2804	2804	MS2	8/82	170306_chiba_GST_02.raw
	High	DGVFLYFEDNAGVIVNNK	Unambiguous	2	1	NP_001085921.1		CID	1	0	1	1	28.52	0.0250979	0	28.1321	18	3	672.002	2013.99	0.339355	135.497	15968	15968	MS2	15/168	170306_chiba_GST_02.raw
OCT63864.1	hypothetical protein XELAEV_18044959mg [Xenopus laevis]	5551.15	70.48	2	1	14	94	227	25.1316	4.7417
	Confidence Level	Sequence	PSM Ambiguity	# Proteins	# Protein Groups	Protein Group Accessions	Modifications	Activation Type	ΔScore	ΔCn	Rank	Search Engine Rank	IonScore	Exp Value	# Missed Cleavages	Isolation Interference [%]	Ion Inject Time [ms]	Charge	m/z [Da]	MH+ [Da]	ΔM [ppm]	RT [min]	First Scan	Last Scan	MS Order	Ions Matched	Spectrum File
	High	ITAFEDFVQSMDVAAFNK	Unambiguous	3	2	OCT63864.1;AAI06341.1		CID	1	0	1	1	125	3.92122e-12	0	28.8311	8	2	1016.99	2032.97	0.656641	123.149	14380	14380	MS2	24/174	170306_chiba_GST_02.raw
	High	ITAFEDFVQSMDVAAFNK	Unambiguous	3	2	OCT63864.1;AAI06341.1		CID	1	0	1	1	123.37	6.60468e-12	0	41.1833	9	2	1016.99	2032.97	1.91759	120.411	14021	14021	MS2	14/174	170306_chiba_GST_02.raw
	High	ITAFEDFVQSMDVAAFNK	Unambiguous	3	2	OCT63864.1;AAI06341.1		CID	1	0	1	1	119.84	1.28654e-11	0	35.6044	17	2	1016.99	2032.97	0.656641	133.326	15694	15694	MS2	14/174	170306_chiba_GST_02.raw
	High	ITAFEDFVQSMDVAAFNK	Unambiguous	3	2	OCT63864.1;AAI06341.1		CID	1	0	1	1	119.05	1.27563e-11	0	31.3142	24	2	1016.99	2032.97	0.356415	137.347	16199	16199	MS2	26/174	170306_chiba_GST_02.raw
	High	ITAFEDFVQSMDVAAFNK	Unambiguous	3	2	OCT63864.1;AAI06341.1		CID	1	0	1	1	116.53	2.26778e-11	0	21.8019	25	2	1016.99	2032.97	-0.0639027	136.381	16080	16080	MS2	14/174	170306_chiba_GST_02.raw
	High	ITAFEDFVQSMDVAAFNK	Unambiguous	3	2	OCT63864.1;AAI06341.1		CID	1	0	1	1	113.95	4.24866e-11	0	18.0162	15	2	1016.99	2032.97	1.137	131.307	15439	15439	MS2	14/174	170306_chiba_GST_02.raw
	High	ITAFEDFVQSMDVAAFNK	Unambiguous	3	2	OCT63864.1;AAI06341.1		CID	1	0	1	1	113.34	4.75033e-11	0	24.2113	18	2	1016.99	2032.97	0.356415	124.224	14522	14522	MS2	11/174	170306_chiba_GST_02.raw
	High	ITAFEDFVQSMDVAAFNK	Unambiguous	3	2	OCT63864.1;AAI06341.1		CID	1	0	1	1	111.91	6.79599e-11	0	43.882	5	2	1016.99	2032.97	1.01691	117.044	13579	13579	MS2	22/174	170306_chiba_GST_02.raw
	High	ITAFEDFVQSMDVAAFNK	Unambiguous	3	2	OCT63864.1;AAI06341.1		CID	1	0	1	1	110.13	9.75363e-11	0	20.5771	16	2	1016.99	2032.97	0.176279	128.583	15090	15090	MS2	15/174	170306_chiba_GST_02.raw
	High	ITAFEDFVQSMDVAAFNK	Unambiguous	3	2	OCT63864.1;AAI06341.1		CID	1	0	1	1	109.28	1.51671e-10	0	32.3785	10	2	1016.99	2032.97	0.896822	121.352	14145	14145	MS2	24/174	170306_chiba_GST_02.raw
	High	ITAFEDFVQSMDVAAFNK	Unambiguous	3	2	OCT63864.1;AAI06341.1		CID	1	0	1	1	106.84	2.08049e-10	0	4.74411	0	2	1016.99	2032.97	0.176279	112.325	12954	12954	MS2	14/174	170306_chiba_GST_02.raw
	High	ITAFEDFVQSMDVAAFNK	Unambiguous	3	2	OCT63864.1;AAI06341.1		CID	1	0	1	1	105.99	2.58062e-10	0	22.6286	15	2	1016.99	2032.97	0.296369	129.393	15195	15195	MS2	13/174	170306_chiba_GST_02.raw
	High	ITAFEDFVQSMDVAAFNK	Unambiguous	3	2	OCT63864.1;AAI06341.1		CID	1	0	1	1	105.86	2.62012e-10	0	30.8223	30	2	1016.99	2032.97	-0.244039	130.349	15319	15319	MS2	13/174	170306_chiba_GST_02.raw
	High	ITAFEDFVQSMDVAAFNK	Unambiguous	3	2	OCT63864.1;AAI06341.1		CID	1	0	1	1	104.6	3.72742e-10	0	0	19	2	1016.99	2032.97	1.19705	135.398	15955	15955	MS2	22/174	170306_chiba_GST_02.raw
	High	ITAFEDFVQSMDVAAFNKI	Unambiguous	3	2	OCT63864.1;AAI06341.1		CID	1	0	1	1	104.39	4.63992e-10	1	7.5598	1	2	1073.53	2146.05	0.297735	123.332	14403	14403	MS2	13/182	170306_chiba_GST_02.raw
	High	ITAFEDFVQSMDVAAFNK	Unambiguous	3	2	OCT63864.1;AAI06341.1		CID	1	0	1	1	104.29	3.7984e-10	0	25.7913	48	2	1016.99	2032.97	0.236324	140.927	16646	16646	MS2	13/174	170306_chiba_GST_02.raw
	High	ITAFEDFVQSMDVAAFNK	Unambiguous	3	2	OCT63864.1;AAI06341.1		CID	1	0	1	1	103.8	5.16918e-10	0	25.4726	21	2	1016.99	2032.97	0.656641	128.858	15125	15125	MS2	13/174	170306_chiba_GST_02.raw
	High	ITAFEDFVQSMDVAAFNK	Unambiguous	3	2	OCT63864.1;AAI06341.1		CID	1	0	1	1	103.74	6.06529e-10	0	37.4422	19	2	1016.99	2032.97	2.21782	132.046	15531	15531	MS2	15/174	170306_chiba_GST_02.raw
	High	ITAFEDFVQSMDVAAFNK	Unambiguous	3	2	OCT63864.1;AAI06341.1		CID	1	0	1	1	102.9	6.38512e-10	0	56.1924	19	2	1016.99	2032.97	0.716686	134.563	15849	15849	MS2	12/174	170306_chiba_GST_02.raw
	High	ITAFEDFVQSMDVAAFNK	Unambiguous	3	2	OCT63864.1;AAI06341.1		CID	1	0	1	1	101.58	7.33251e-10	0	28.0905	41	2	1016.99	2032.97	1.07696	136.867	16140	16140	MS2	22/174	170306_chiba_GST_02.raw
	High	ITAFEDFVQSMDVAAFNK	Unambiguous	3	2	OCT63864.1;AAI06341.1		CID	1	0	1	1	101.39	9.04002e-10	0	44.887	18	2	1016.99	2032.97	0.776732	142.081	16792	16792	MS2	11/174	170306_chiba_GST_02.raw
	High	ITAFEDFVQSMDVAAFNK	Unambiguous	3	2	OCT63864.1;AAI06341.1		CID	1	0	1	1	100.87	8.38926e-10	0	3.32842	0	2	1016.99	2032.97	0.296369	113.115	13059	13059	MS2	13/174	170306_chiba_GST_02.raw
	High	ITAFEDFVQSMDVAAFNK	Unambiguous	3	2	OCT63864.1;AAI06341.1		CID	1	0	1	1	100.39	1.13807e-09	0	52.6722	7	2	1016.99	2032.97	0.776732	117.973	13700	13700	MS2	10/174	170306_chiba_GST_02.raw
	High	ITAFEDFVQSMDVAAFNK	Unambiguous	3	2	OCT63864.1;AAI06341.1		CID	1	0	1	1	100.12	1.02625e-09	0	37.958	3	2	1016.99	2032.97	1.01691	116.648	13526	13526	MS2	10/174	170306_chiba_GST_02.raw
	High	ITAFEDFVQSMDVAAFNK	Unambiguous	3	2	OCT63864.1;AAI06341.1		CID	1	0	1	1	97.54	2.18485e-09	0	48.0638	15	2	1016.99	2032.97	0.596596	141.072	16664	16664	MS2	24/174	170306_chiba_GST_02.raw
	High	ITAFEDFVQSMDVAAFNK	Unambiguous	3	2	OCT63864.1;AAI06341.1		CID	1	0	1	1	97.45	1.84384e-09	0	16.0824	15	2	1016.99	2032.97	0.356415	120.997	14099	14099	MS2	24/174	170306_chiba_GST_02.raw
	High	ITAFEDFVQSMDVAAFNK	Unambiguous	3	2	OCT63864.1;AAI06341.1		CID	1	0	1	1	97.04	1.98685e-09	0	2.71302	0	2	1016.99	2032.97	0.176279	113.914	13164	13164	MS2	24/174	170306_chiba_GST_02.raw
	High	ITAFEDFVQSMDVAAFNKI	Unambiguous	3	2	OCT63864.1;AAI06341.1		CID	1	0	1	1	96.7	3.01453e-09	1	11.0542	1	2	1073.53	2146.05	0.639023	122.521	14298	14298	MS2	14/182	170306_chiba_GST_02.raw
	High	ITAFEDFVQSMDVAAFNK	Unambiguous	3	2	OCT63864.1;AAI06341.1		CID	1	0	1	1	95.68	2.85268e-09	0	35.0301	18	2	1016.99	2032.97	1.01691	122.94	14353	14353	MS2	22/174	170306_chiba_GST_02.raw
	High	ITAFEDFVQSMDVAAFNK	Unambiguous	3	2	OCT63864.1;AAI06341.1		CID	1	0	1	1	94.65	4.26746e-09	0	32.0536	21	2	1016.99	2032.97	0.776732	127.27	14920	14920	MS2	26/174	170306_chiba_GST_02.raw
	High	ITAFEDFVQSMDVAAFNK	Unambiguous	3	2	OCT63864.1;AAI06341.1		CID	1	0	1	1	94.56	4.4968e-09	0	30.8626	37	2	1016.99	2032.97	0.896822	131.212	15427	15427	MS2	25/174	170306_chiba_GST_02.raw
	High	ITAFEDFVQSMDVAAFNK	Unambiguous	3	2	OCT63864.1;AAI06341.1		CID	1	0	1	1	94.44	3.61548e-09	0	20.3183	10	2	1016.99	2032.97	0.176279	122.657	14316	14316	MS2	25/174	170306_chiba_GST_02.raw
	High	SSILLDVKPWDDETDMGK	Unambiguous	3	2	OCT63864.1;AAI06341.1		CID	1	0	1	1	94.05	5.60809e-09	0	6.85039	0	2	1025	2048.98	0.027057	81.4115	8679	8679	MS2	10/184	170306_chiba_GST_02.raw
	High	ITAFEDFVQSMDVAAFNK	Unambiguous	3	2	OCT63864.1;AAI06341.1		CID	1	0	1	1	92.75	6.84841e-09	0	15.655	1	2	1016.99	2032.97	0.836777	115.015	13311	13311	MS2	21/174	170306_chiba_GST_02.raw
	High	ITAFEDFVQSMDVAAFNKI	Unambiguous	3	2	OCT63864.1;AAI06341.1		CID	1	0	1	1	90.98	9.01734e-09	1	10.8607	7	2	1073.53	2146.05	0.183972	124.741	14590	14590	MS2	24/182	170306_chiba_GST_02.raw
	High	ITAFEDFVQSMDVAAFNK	Unambiguous	3	2	OCT63864.1;AAI06341.1		CID	1	0	1	1	90.19	1.18692e-08	0	24.2167	10	2	1016.99	2032.97	0.596596	121.815	14205	14205	MS2	24/174	170306_chiba_GST_02.raw
	High	LQIQCVVEDDKVGTDVLEEK	Unambiguous	3	2	OCT63864.1;AAI06341.1		CID	1	0	1	1	90.16	1.16141e-08	1	24.6634	0	2	1130.57	2260.14	1.04552	77.8055	8155	8155	MS2	10/210	170306_chiba_GST_02.raw
	High	ITAFEDFVQSMDVAAFNK	Unambiguous	3	2	OCT63864.1;AAI06341.1		CID	1	0	1	1	90.05	1.06764e-08	0	15.79	23	2	1016.99	2032.97	1.31714	137.731	16246	16246	MS2	21/174	170306_chiba_GST_02.raw
	High	ITAFEDFVQSMDVAAFNKI	Unambiguous	3	2	OCT63864.1;AAI06341.1		CID	1	0	1	1	90.03	1.39533e-08	1	8.45615	2	2	1073.53	2146.05	0.411497	124.127	14509	14509	MS2	15/182	170306_chiba_GST_02.raw
	High	ITAFEDFVQSMDVAAFNK	Unambiguous	3	2	OCT63864.1;AAI06341.1		CID	1	0	1	1	87.14	1.99959e-08	0	51.9309	17	2	1016.99	2032.97	0.476505	126.889	14871	14871	MS2	12/174	170306_chiba_GST_02.raw
	High	ALGNYGPVNIEDTTGSAAK	Unambiguous	3	2	OCT63864.1;AAI06341.1		CID	1	0	1	1	86.95	2.95691e-08	0	18.1776	0	3	626.646	1877.92	-0.0250023	65.7605	6343	6343	MS2	12/184	170306_chiba_GST_02.raw
	High	ITAFEDFVQSMDVAAFNK	Unambiguous	3	2	OCT63864.1;AAI06341.1		CID	1	0	1	1	86.47	2.27678e-08	0	19.4859	40	2	1016.99	2032.97	0.056188	135.046	15910	15910	MS2	24/174	170306_chiba_GST_02.raw
	High	ITAFEDFVQSMDVAAFNK	Unambiguous	3	2	OCT63864.1;AAI06341.1		CID	1	0	1	1	86.05	3.0915e-08	0	9.86465	8	2	1016.99	2032.97	0.716686	122.268	14264	14264	MS2	24/174	170306_chiba_GST_02.raw
	High	ITAFEDFVQSMDVAAFNK	Unambiguous	3	2	OCT63864.1;AAI06341.1		CID	1	0	1	1	84.51	4.56657e-08	0	5.55695	19	2	1016.99	2032.97	0.836777	134.177	15801	15801	MS2	24/174	170306_chiba_GST_02.raw
	High	SSILLDVKPWDDETDMGKLEECVR	Unambiguous	2	2	AAI06341.1;OCT63864.1		CID	1	0	1	1	84.51	3.53997e-08	1	2.62983	0	3	926.783	2778.33	0.484532	87.9796	9617	9617	MS2	18/256	170306_chiba_GST_02.raw
	High	SIQMDGLLWGSSK	Unambiguous	3	2	OCT63864.1;AAI06341.1		CID	1	0	1	1	84.15	6.44191e-08	0	10.5793	1	2	711.359	1421.71	0.59884	85.782	9306	9306	MS2	11/138	170306_chiba_GST_02.raw
	High	ITAFEDFVQSMDVAAFNK	Unambiguous	3	2	OCT63864.1;AAI06341.1		CID	1	0	1	1	83.1	5.33859e-08	0	21.971	18	2	1016.99	2032.97	-0.36413	130.223	15303	15303	MS2	13/174	170306_chiba_GST_02.raw
	High	ALGNYGPVNIEDTTGSAAK	Unambiguous	3	2	OCT63864.1;AAI06341.1		CID	1	0	1	1	80.85	1.20459e-07	0	1.39936	0	2	939.466	1877.92	-0.0828448	66.2944	6425	6425	MS2	13/184	170306_chiba_GST_02.raw
	High	SIQMDGLLWGSSK	Unambiguous	3	2	OCT63864.1;AAI06341.1		CID	1	0	1	1	79.99	1.68387e-07	0	8.17481	0	2	711.359	1421.71	0.684701	84.4244	9113	9113	MS2	20/138	170306_chiba_GST_02.raw
	High	KALGNYGPVNIEDTTGSAAK	Unambiguous	3	2	OCT63864.1;AAI06341.1		CID	1	0	1	1	78.14	2.32494e-07	1	1.0165	0	2	1003.51	2006.02	0.166204	52.5878	4284	4284	MS2	29/200	170306_chiba_GST_02.raw
	High	LQIQCVVEDDKVGTDVLEEK	Unambiguous	3	2	OCT63864.1;AAI06341.1		CID	1	0	1	1	78.04	2.00221e-07	1	20.8948	2	2	1130.57	2260.14	0.181357	77.9606	8178	8178	MS2	9/210	170306_chiba_GST_02.raw
	High	SIQMDGLLWGSSK	Unambiguous	3	2	OCT63864.1;AAI06341.1		CID	1	0	1	1	77.45	4.44321e-07	0	6.34393	0	2	711.358	1421.71	0.0836704	84.8574	9175	9175	MS2	10/138	170306_chiba_GST_02.raw
	High	KLQIQCVVEDDKVGTDVLEEK	Unambiguous	3	2	OCT63864.1;AAI06341.1		CID	1	0	1	1	76.62	2.54792e-07	2	8.83147	0	3	796.749	2388.23	0.268521	73.2509	7482	7482	MS2	27/222	170306_chiba_GST_02.raw
	High	ALGNYGPVNIEDTTGSAAK	Unambiguous	3	2	OCT63864.1;AAI06341.1		CID	1	0	1	1	75.67	4.05174e-07	0	3.0581	0	2	939.466	1877.92	0.372175	65.476	6300	6300	MS2	13/184	170306_chiba_GST_02.raw
	High	ITAFEDFVQSMDVAAFNKI	Unambiguous	3	2	OCT63864.1;AAI06341.1		CID	1	0	1	1	75	4.3007e-07	1	7.93184	1	3	716.023	2146.05	0.348351	123.339	14404	14404	MS2	15/182	170306_chiba_GST_02.raw
	High	ITAFEDFVQSMDVAAFNK	Unambiguous	3	2	OCT63864.1;AAI06341.1		CID	1	0	1	1	70.44	9.26241e-07	0	3.88523	0	3	678.328	2032.97	0.259732	112.333	12955	12955	MS2	13/174	170306_chiba_GST_02.raw
	High	ITAFEDFVQSMDVAAFNK	Unambiguous	3	2	OCT63864.1;AAI06341.1		CID	1	0	1	1	68.64	1.37457e-06	0	16.6718	2	3	678.328	2032.97	0.169665	115.866	13423	13423	MS2	12/174	170306_chiba_GST_02.raw
	High	KALGNYGPVNIEDTTGSAAK	Unambiguous	3	2	OCT63864.1;AAI06341.1		CID	1	0	1	1	64.56	5.30167e-06	1	7.8528	0	3	669.345	2006.02	0.311631	52.5523	4278	4278	MS2	22/200	170306_chiba_GST_02.raw
	High	SYIEGYVPSQADVAVFDALSAAPPADLFHALR	Unambiguous	2	1	OCT63864.1		CID	1	0	1	1	62.44	5.9012e-06	0	2.5658	0	3	1130.91	3390.7	0.727524	117.085	13584	13584	MS2	21/342	170306_chiba_GST_02.raw
	High	ITAFEDFVQSMDVAAFNK	Unambiguous	3	2	OCT63864.1;AAI06341.1		CID	1	0	1	1	62.38	5.83877e-06	0	8.22635	0	3	678.328	2032.97	-0.0104715	113.921	13165	13165	MS2	17/174	170306_chiba_GST_02.raw
	High	ITAFEDFVQSMDVAAFNKI	Unambiguous	3	2	OCT63864.1;AAI06341.1		CID	1	0	1	1	60.92	1.1651e-05	1	7.61368	0	3	716.023	2146.05	0.689638	122.536	14300	14300	MS2	15/182	170306_chiba_GST_02.raw
	High	ITAFEDFVQSMDVAAFNK	Unambiguous	3	2	OCT63864.1;AAI06341.1		CID	1	0	1	1	59.29	1.18349e-05	0	2.76492	0	3	678.328	2032.97	0.169665	113.123	13060	13060	MS2	12/174	170306_chiba_GST_02.raw
	High	VLNEFLADK	Unambiguous	2	2	AAI06341.1;OCT63864.1		CID	1	0	1	1	59.2	1.95969e-05	0	16.3596	0	2	524.787	1048.57	-0.0791166	65.2031	6259	6259	MS2	7/84	170306_chiba_GST_02.raw
	High	SYIEGYVPSQADVAVFDALSAAPPADLFHALR	Unambiguous	2	1	OCT63864.1		CID	1	0	1	1	57.67	2.00072e-05	0	2.5845	0	3	1130.91	3390.7	0.403511	117.889	13689	13689	MS2	25/342	170306_chiba_GST_02.raw
	High	VLNEFLADK	Unambiguous	2	2	AAI06341.1;OCT63864.1		CID	1	0	1	1	55.93	5.92227e-05	0	12.9583	0	2	524.787	1048.57	0.153716	65.8831	6361	6361	MS2	7/84	170306_chiba_GST_02.raw
	High	VLNEFLADK	Unambiguous	2	2	AAI06341.1;OCT63864.1		CID	1	0	1	1	54.43	5.87743e-05	0	58.8217	17	2	524.787	1048.57	-0.0791166	134.369	15824	15824	MS2	7/84	170306_chiba_GST_02.raw
	High	ITAFEDFVQSMDVAAFNK	Unambiguous	3	2	OCT63864.1;AAI06341.1		CID	1	0	1	1	53.83	4.1607e-05	0	18.5344	1	3	678.328	2032.97	0.169665	114.728	13272	13272	MS2	12/174	170306_chiba_GST_02.raw
	High	SYIEGYVPSQADVAVFDALSAAPPADLFHALR	Unambiguous	2	1	OCT63864.1		CID	1	0	1	1	52.59	6.14151e-05	0	4.13879	0	3	1130.91	3390.7	0.511515	116.293	13479	13479	MS2	23/342	170306_chiba_GST_02.raw
	High	VLNEFLADK	Unambiguous	2	2	AAI06341.1;OCT63864.1		CID	1	0	1	1	51.47	0.000142571	0	43.6019	14	2	524.788	1048.57	0.502965	130.564	15346	15346	MS2	7/84	170306_chiba_GST_02.raw
	High	ALGNYGPVNIEDTTGSAAK	Unambiguous	3	2	OCT63864.1;AAI06341.1		CID	1	0	1	1	51.33	0.000110063	0	30.532	3	2	939.466	1877.92	0.50218	67.3429	6586	6586	MS2	12/184	170306_chiba_GST_02.raw
	High	ITAFEDFVQSMDVAAFNK	Unambiguous	3	2	OCT63864.1;AAI06341.1		CID	1	0	1	1	50.74	8.34901e-05	0	23.5832	1	3	678.328	2032.97	0.0795965	115.546	13381	13381	MS2	14/174	170306_chiba_GST_02.raw
	High	VLNEFLADK	Unambiguous	2	2	AAI06341.1;OCT63864.1		CID	1	0	1	1	50.68	0.000171013	0	61.4595	13	2	524.788	1048.57	0.502965	136.691	16118	16118	MS2	6/84	170306_chiba_GST_02.raw
	High	ITAFEDFVQSMDVAAFNK	Unambiguous	3	2	OCT63864.1;AAI06341.1		CID	1	0	1	1	50.34	9.57063e-05	0	37.3859	4	3	678.328	2032.97	0.439868	116.373	13490	13490	MS2	24/174	170306_chiba_GST_02.raw
	High	VLNEFLADK	Unambiguous	2	2	AAI06341.1;OCT63864.1		CID	1	0	1	1	47.31	0.000377134	0	59.0729	17	2	524.788	1048.57	0.386548	141.429	16709	16709	MS2	6/84	170306_chiba_GST_02.raw
	High	ITAFEDFVQSMDVAAFNK	Unambiguous	3	2	OCT63864.1;AAI06341.1		CID	1	0	1	1	43.53	0.000570037	0	49.6662	4	3	678.328	2032.97	0.890208	118.834	13812	13812	MS2	17/174	170306_chiba_GST_02.raw
	High	ITAFEDFVQSMDVAAFNKI	Unambiguous	3	2	OCT63864.1;AAI06341.1		CID	1	0	1	1	43	0.000664073	1	27.4895	12	2	1073.53	2146.05	-3.00139	128.524	15083	15083	MS2	13/182	170306_chiba_GST_02.raw
	High	ITAFEDFVQSMDVAAFNK	Unambiguous	3	2	OCT63864.1;AAI06341.1		CID	1	0	1	1	42.21	0.000748461	0	55.2123	5	3	678.328	2032.97	0.710072	117.174	13596	13596	MS2	10/174	170306_chiba_GST_02.raw
	High	LQIQCVVEDDKVGTDVLEEK	Unambiguous	3	2	OCT63864.1;AAI06341.1		CID	1	0	1	1	41.31	0.000850546	1	26.2495	0	3	754.051	2260.14	0.553478	77.6348	8129	8129	MS2	19/210	170306_chiba_GST_02.raw
	High	LAQYEAK	Unambiguous	3	2	OCT63864.1;AAI06341.1		CID	1	0	1	1	39.85	0.00172351	0	12.3045	0	2	411.721	822.436	-0.0326181	43.3646	2774	2774	MS2	6/56	170306_chiba_GST_02.raw
	High	ITAFEDFVQSMDVAAFNK	Unambiguous	3	2	OCT63864.1;AAI06341.1		CID	1	0	1	1	39.05	0.00127563	0	41.5081	4	3	678.328	2032.97	0.259732	118.591	13779	13779	MS2	21/174	170306_chiba_GST_02.raw
	High	VLNEFLADK	Unambiguous	2	2	AAI06341.1;OCT63864.1		CID	1	0	1	1	38.53	0.00280563	0	60.2359	14	2	524.788	1048.57	0.502965	142.201	16807	16807	MS2	10/84	170306_chiba_GST_02.raw
	High	ITAFEDFVQSMDVAAFNK	Unambiguous	3	2	OCT63864.1;AAI06341.1		CID	1	0	1	1	36.97	0.00249128	0	48.917	3	3	678.328	2032.97	0.529936	116.685	13531	13531	MS2	21/174	170306_chiba_GST_02.raw
	High	LVPVGYGIK	Unambiguous	21	4	OCT63864.1;AAI06341.1;AAH72139.1;NP_001084375.1		CID	1	0	1	1	36.37	0.00114184	0	3.89385	0	2	473.292	945.576	-0.442821	56.9592	4971	4971	MS2	4/66	170306_chiba_GST_02.raw
	High	SSILLDVKPWDDETDMGK	Unambiguous	3	2	OCT63864.1;AAI06341.1		CID	1	0	1	1	36.18	0.00351846	0	6.30359	0	3	683.667	2048.99	0.52689	81.7857	8733	8733	MS2	22/184	170306_chiba_GST_02.raw
	High	ITAFEDFVQSMDVAAFNK	Unambiguous	3	2	OCT63864.1;AAI06341.1		CID	1	0	1	1	35.33	0.00298951	0	52.3953	15	3	678.328	2032.97	-0.190608	132.206	15551	15551	MS2	10/174	170306_chiba_GST_02.raw
	High	SSILLDVKPWDDETDMGK	Unambiguous	3	2	OCT63864.1;AAI06341.1		CID	1	0	1	1	34.68	0.00462955	0	10.1797	0	3	683.667	2048.99	0.258798	81.3647	8672	8672	MS2	15/184	170306_chiba_GST_02.raw
	High	ITAFEDFVQSMDVAAFNK	Unambiguous	3	2	OCT63864.1;AAI06341.1		CID	1	0	1	1	34.29	0.00381701	0	55.2231	9	3	678.328	2032.97	0.3498	131.854	15507	15507	MS2	17/174	170306_chiba_GST_02.raw
	High	ITAFEDFVQSMDVAAFNK	Unambiguous	3	2	OCT63864.1;AAI06341.1		CID	1	0	1	1	33.03	0.00502714	0	26.8733	3	3	678.328	2032.97	-0.0104715	116.832	13551	13551	MS2	10/174	170306_chiba_GST_02.raw
	High	ITAFEDFVQSMDVAAFNK	Unambiguous	3	2	OCT63864.1;AAI06341.1		CID	1	0	1	1	32.56	0.00557399	0	35.4175	4	3	678.328	2032.97	0.169665	117.345	13618	13618	MS2	11/174	170306_chiba_GST_02.raw
	High	VLNEFLADK	Unambiguous	2	2	AAI06341.1;OCT63864.1		CID	1	0	1	1	32.32	0.0117228	0	68.0139	100	2	524.788	1048.57	0.502965	148.406	17474	17474	MS2	5/84	170306_chiba_GST_02.raw
	High	ITAFEDFVQSMDVAAFNK	Unambiguous	3	2	OCT63864.1;AAI06341.1		CID	1	0	1	1	29.7	0.0115724	0	44.9272	7	3	678.328	2032.97	-0.280676	135.958	16028	16028	MS2	11/174	170306_chiba_GST_02.raw
	High	ITAFEDFVQSMDVAAFNK	Unambiguous	3	2	OCT63864.1;AAI06341.1		CID	1	0	1	1	29.62	0.0108053	0	54.2122	6	3	678.328	2032.97	0.0795965	118.497	13767	13767	MS2	21/174	170306_chiba_GST_02.raw
	High	WYNHIK	Unambiguous	3	2	OCT63864.1;AAI06341.1		CID	1	0	1	1	29.44	0.00608631	0	50.3695	0	2	430.724	860.442	0.249429	45.038	3053	3053	MS2	4/48	170306_chiba_GST_02.raw
	High	SIQMDGLLWGSSK	Unambiguous	3	2	OCT63864.1;AAI06341.1		CID	1	0	1	1	29.33	0.0231612	0	74.9319	2	2	711.358	1421.71	-0.689085	94.5524	10532	10532	MS2	10/138	170306_chiba_GST_02.raw
AAI06341.1	Wu:fj06d02 protein [Xenopus laevis]	5442.74	70.48	1	1	14	92	227	25.1306	4.77979
	Confidence Level	Sequence	PSM Ambiguity	# Proteins	# Protein Groups	Protein Group Accessions	Modifications	Activation Type	ΔScore	ΔCn	Rank	Search Engine Rank	IonScore	Exp Value	# Missed Cleavages	Isolation Interference [%]	Ion Inject Time [ms]	Charge	m/z [Da]	MH+ [Da]	ΔM [ppm]	RT [min]	First Scan	Last Scan	MS Order	Ions Matched	Spectrum File
	High	ITAFEDFVQSMDVAAFNK	Unambiguous	3	2	OCT63864.1;AAI06341.1		CID	1	0	1	1	125	3.92122e-12	0	28.8311	8	2	1016.99	2032.97	0.656641	123.149	14380	14380	MS2	24/174	170306_chiba_GST_02.raw
	High	ITAFEDFVQSMDVAAFNK	Unambiguous	3	2	OCT63864.1;AAI06341.1		CID	1	0	1	1	123.37	6.60468e-12	0	41.1833	9	2	1016.99	2032.97	1.91759	120.411	14021	14021	MS2	14/174	170306_chiba_GST_02.raw
	High	ITAFEDFVQSMDVAAFNK	Unambiguous	3	2	OCT63864.1;AAI06341.1		CID	1	0	1	1	119.84	1.28654e-11	0	35.6044	17	2	1016.99	2032.97	0.656641	133.326	15694	15694	MS2	14/174	170306_chiba_GST_02.raw
	High	ITAFEDFVQSMDVAAFNK	Unambiguous	3	2	OCT63864.1;AAI06341.1		CID	1	0	1	1	119.05	1.27563e-11	0	31.3142	24	2	1016.99	2032.97	0.356415	137.347	16199	16199	MS2	26/174	170306_chiba_GST_02.raw
	High	ITAFEDFVQSMDVAAFNK	Unambiguous	3	2	OCT63864.1;AAI06341.1		CID	1	0	1	1	116.53	2.26778e-11	0	21.8019	25	2	1016.99	2032.97	-0.0639027	136.381	16080	16080	MS2	14/174	170306_chiba_GST_02.raw
	High	ITAFEDFVQSMDVAAFNK	Unambiguous	3	2	OCT63864.1;AAI06341.1		CID	1	0	1	1	113.95	4.24866e-11	0	18.0162	15	2	1016.99	2032.97	1.137	131.307	15439	15439	MS2	14/174	170306_chiba_GST_02.raw
	High	ITAFEDFVQSMDVAAFNK	Unambiguous	3	2	OCT63864.1;AAI06341.1		CID	1	0	1	1	113.34	4.75033e-11	0	24.2113	18	2	1016.99	2032.97	0.356415	124.224	14522	14522	MS2	11/174	170306_chiba_GST_02.raw
	High	ITAFEDFVQSMDVAAFNK	Unambiguous	3	2	OCT63864.1;AAI06341.1		CID	1	0	1	1	111.91	6.79599e-11	0	43.882	5	2	1016.99	2032.97	1.01691	117.044	13579	13579	MS2	22/174	170306_chiba_GST_02.raw
	High	ITAFEDFVQSMDVAAFNK	Unambiguous	3	2	OCT63864.1;AAI06341.1		CID	1	0	1	1	110.13	9.75363e-11	0	20.5771	16	2	1016.99	2032.97	0.176279	128.583	15090	15090	MS2	15/174	170306_chiba_GST_02.raw
	High	ITAFEDFVQSMDVAAFNK	Unambiguous	3	2	OCT63864.1;AAI06341.1		CID	1	0	1	1	109.28	1.51671e-10	0	32.3785	10	2	1016.99	2032.97	0.896822	121.352	14145	14145	MS2	24/174	170306_chiba_GST_02.raw
	High	ITAFEDFVQSMDVAAFNK	Unambiguous	3	2	OCT63864.1;AAI06341.1		CID	1	0	1	1	106.84	2.08049e-10	0	4.74411	0	2	1016.99	2032.97	0.176279	112.325	12954	12954	MS2	14/174	170306_chiba_GST_02.raw
	High	ITAFEDFVQSMDVAAFNK	Unambiguous	3	2	OCT63864.1;AAI06341.1		CID	1	0	1	1	105.99	2.58062e-10	0	22.6286	15	2	1016.99	2032.97	0.296369	129.393	15195	15195	MS2	13/174	170306_chiba_GST_02.raw
	High	ITAFEDFVQSMDVAAFNK	Unambiguous	3	2	OCT63864.1;AAI06341.1		CID	1	0	1	1	105.86	2.62012e-10	0	30.8223	30	2	1016.99	2032.97	-0.244039	130.349	15319	15319	MS2	13/174	170306_chiba_GST_02.raw
	High	ITAFEDFVQSMDVAAFNK	Unambiguous	3	2	OCT63864.1;AAI06341.1		CID	1	0	1	1	104.6	3.72742e-10	0	0	19	2	1016.99	2032.97	1.19705	135.398	15955	15955	MS2	22/174	170306_chiba_GST_02.raw
	High	ITAFEDFVQSMDVAAFNKI	Unambiguous	3	2	OCT63864.1;AAI06341.1		CID	1	0	1	1	104.39	4.63992e-10	1	7.5598	1	2	1073.53	2146.05	0.297735	123.332	14403	14403	MS2	13/182	170306_chiba_GST_02.raw
	High	ITAFEDFVQSMDVAAFNK	Unambiguous	3	2	OCT63864.1;AAI06341.1		CID	1	0	1	1	104.29	3.7984e-10	0	25.7913	48	2	1016.99	2032.97	0.236324	140.927	16646	16646	MS2	13/174	170306_chiba_GST_02.raw
	High	ITAFEDFVQSMDVAAFNK	Unambiguous	3	2	OCT63864.1;AAI06341.1		CID	1	0	1	1	103.8	5.16918e-10	0	25.4726	21	2	1016.99	2032.97	0.656641	128.858	15125	15125	MS2	13/174	170306_chiba_GST_02.raw
	High	ITAFEDFVQSMDVAAFNK	Unambiguous	3	2	OCT63864.1;AAI06341.1		CID	1	0	1	1	103.74	6.06529e-10	0	37.4422	19	2	1016.99	2032.97	2.21782	132.046	15531	15531	MS2	15/174	170306_chiba_GST_02.raw
	High	ITAFEDFVQSMDVAAFNK	Unambiguous	3	2	OCT63864.1;AAI06341.1		CID	1	0	1	1	102.9	6.38512e-10	0	56.1924	19	2	1016.99	2032.97	0.716686	134.563	15849	15849	MS2	12/174	170306_chiba_GST_02.raw
	High	ITAFEDFVQSMDVAAFNK	Unambiguous	3	2	OCT63864.1;AAI06341.1		CID	1	0	1	1	101.58	7.33251e-10	0	28.0905	41	2	1016.99	2032.97	1.07696	136.867	16140	16140	MS2	22/174	170306_chiba_GST_02.raw
	High	ITAFEDFVQSMDVAAFNK	Unambiguous	3	2	OCT63864.1;AAI06341.1		CID	1	0	1	1	101.39	9.04002e-10	0	44.887	18	2	1016.99	2032.97	0.776732	142.081	16792	16792	MS2	11/174	170306_chiba_GST_02.raw
	High	ITAFEDFVQSMDVAAFNK	Unambiguous	3	2	OCT63864.1;AAI06341.1		CID	1	0	1	1	100.87	8.38926e-10	0	3.32842	0	2	1016.99	2032.97	0.296369	113.115	13059	13059	MS2	13/174	170306_chiba_GST_02.raw
	High	ITAFEDFVQSMDVAAFNK	Unambiguous	3	2	OCT63864.1;AAI06341.1		CID	1	0	1	1	100.39	1.13807e-09	0	52.6722	7	2	1016.99	2032.97	0.776732	117.973	13700	13700	MS2	10/174	170306_chiba_GST_02.raw
	High	ITAFEDFVQSMDVAAFNK	Unambiguous	3	2	OCT63864.1;AAI06341.1		CID	1	0	1	1	100.12	1.02625e-09	0	37.958	3	2	1016.99	2032.97	1.01691	116.648	13526	13526	MS2	10/174	170306_chiba_GST_02.raw
	High	ITAFEDFVQSMDVAAFNK	Unambiguous	3	2	OCT63864.1;AAI06341.1		CID	1	0	1	1	97.54	2.18485e-09	0	48.0638	15	2	1016.99	2032.97	0.596596	141.072	16664	16664	MS2	24/174	170306_chiba_GST_02.raw
	High	ITAFEDFVQSMDVAAFNK	Unambiguous	3	2	OCT63864.1;AAI06341.1		CID	1	0	1	1	97.45	1.84384e-09	0	16.0824	15	2	1016.99	2032.97	0.356415	120.997	14099	14099	MS2	24/174	170306_chiba_GST_02.raw
	High	ITAFEDFVQSMDVAAFNK	Unambiguous	3	2	OCT63864.1;AAI06341.1		CID	1	0	1	1	97.04	1.98685e-09	0	2.71302	0	2	1016.99	2032.97	0.176279	113.914	13164	13164	MS2	24/174	170306_chiba_GST_02.raw
	High	ITAFEDFVQSMDVAAFNKI	Unambiguous	3	2	OCT63864.1;AAI06341.1		CID	1	0	1	1	96.7	3.01453e-09	1	11.0542	1	2	1073.53	2146.05	0.639023	122.521	14298	14298	MS2	14/182	170306_chiba_GST_02.raw
	High	ITAFEDFVQSMDVAAFNK	Unambiguous	3	2	OCT63864.1;AAI06341.1		CID	1	0	1	1	95.68	2.85268e-09	0	35.0301	18	2	1016.99	2032.97	1.01691	122.94	14353	14353	MS2	22/174	170306_chiba_GST_02.raw
	High	ITAFEDFVQSMDVAAFNK	Unambiguous	3	2	OCT63864.1;AAI06341.1		CID	1	0	1	1	94.65	4.26746e-09	0	32.0536	21	2	1016.99	2032.97	0.776732	127.27	14920	14920	MS2	26/174	170306_chiba_GST_02.raw
	High	ITAFEDFVQSMDVAAFNK	Unambiguous	3	2	OCT63864.1;AAI06341.1		CID	1	0	1	1	94.56	4.4968e-09	0	30.8626	37	2	1016.99	2032.97	0.896822	131.212	15427	15427	MS2	25/174	170306_chiba_GST_02.raw
	High	ITAFEDFVQSMDVAAFNK	Unambiguous	3	2	OCT63864.1;AAI06341.1		CID	1	0	1	1	94.44	3.61548e-09	0	20.3183	10	2	1016.99	2032.97	0.176279	122.657	14316	14316	MS2	25/174	170306_chiba_GST_02.raw
	High	SSILLDVKPWDDETDMGK	Unambiguous	3	2	OCT63864.1;AAI06341.1		CID	1	0	1	1	94.05	5.60809e-09	0	6.85039	0	2	1025	2048.98	0.027057	81.4115	8679	8679	MS2	10/184	170306_chiba_GST_02.raw
	High	ITAFEDFVQSMDVAAFNK	Unambiguous	3	2	OCT63864.1;AAI06341.1		CID	1	0	1	1	92.75	6.84841e-09	0	15.655	1	2	1016.99	2032.97	0.836777	115.015	13311	13311	MS2	21/174	170306_chiba_GST_02.raw
	High	ITAFEDFVQSMDVAAFNKI	Unambiguous	3	2	OCT63864.1;AAI06341.1		CID	1	0	1	1	90.98	9.01734e-09	1	10.8607	7	2	1073.53	2146.05	0.183972	124.741	14590	14590	MS2	24/182	170306_chiba_GST_02.raw
	High	ITAFEDFVQSMDVAAFNK	Unambiguous	3	2	OCT63864.1;AAI06341.1		CID	1	0	1	1	90.19	1.18692e-08	0	24.2167	10	2	1016.99	2032.97	0.596596	121.815	14205	14205	MS2	24/174	170306_chiba_GST_02.raw
	High	LQIQCVVEDDKVGTDVLEEK	Unambiguous	3	2	OCT63864.1;AAI06341.1		CID	1	0	1	1	90.16	1.16141e-08	1	24.6634	0	2	1130.57	2260.14	1.04552	77.8055	8155	8155	MS2	10/210	170306_chiba_GST_02.raw
	High	ITAFEDFVQSMDVAAFNK	Unambiguous	3	2	OCT63864.1;AAI06341.1		CID	1	0	1	1	90.05	1.06764e-08	0	15.79	23	2	1016.99	2032.97	1.31714	137.731	16246	16246	MS2	21/174	170306_chiba_GST_02.raw
	High	ITAFEDFVQSMDVAAFNKI	Unambiguous	3	2	OCT63864.1;AAI06341.1		CID	1	0	1	1	90.03	1.39533e-08	1	8.45615	2	2	1073.53	2146.05	0.411497	124.127	14509	14509	MS2	15/182	170306_chiba_GST_02.raw
	High	ITAFEDFVQSMDVAAFNK	Unambiguous	3	2	OCT63864.1;AAI06341.1		CID	1	0	1	1	87.14	1.99959e-08	0	51.9309	17	2	1016.99	2032.97	0.476505	126.889	14871	14871	MS2	12/174	170306_chiba_GST_02.raw
	High	ALGNYGPVNIEDTTGSAAK	Unambiguous	3	2	OCT63864.1;AAI06341.1		CID	1	0	1	1	86.95	2.95691e-08	0	18.1776	0	3	626.646	1877.92	-0.0250023	65.7605	6343	6343	MS2	12/184	170306_chiba_GST_02.raw
	High	ITAFEDFVQSMDVAAFNK	Unambiguous	3	2	OCT63864.1;AAI06341.1		CID	1	0	1	1	86.47	2.27678e-08	0	19.4859	40	2	1016.99	2032.97	0.056188	135.046	15910	15910	MS2	24/174	170306_chiba_GST_02.raw
	High	ITAFEDFVQSMDVAAFNK	Unambiguous	3	2	OCT63864.1;AAI06341.1		CID	1	0	1	1	86.05	3.0915e-08	0	9.86465	8	2	1016.99	2032.97	0.716686	122.268	14264	14264	MS2	24/174	170306_chiba_GST_02.raw
	High	ITAFEDFVQSMDVAAFNK	Unambiguous	3	2	OCT63864.1;AAI06341.1		CID	1	0	1	1	84.51	4.56657e-08	0	5.55695	19	2	1016.99	2032.97	0.836777	134.177	15801	15801	MS2	24/174	170306_chiba_GST_02.raw
	High	SSILLDVKPWDDETDMGKLEECVR	Unambiguous	2	2	AAI06341.1;OCT63864.1		CID	1	0	1	1	84.51	3.53997e-08	1	2.62983	0	3	926.783	2778.33	0.484532	87.9796	9617	9617	MS2	18/256	170306_chiba_GST_02.raw
	High	SIQMDGLLWGSSK	Unambiguous	3	2	OCT63864.1;AAI06341.1		CID	1	0	1	1	84.15	6.44191e-08	0	10.5793	1	2	711.359	1421.71	0.59884	85.782	9306	9306	MS2	11/138	170306_chiba_GST_02.raw
	High	ITAFEDFVQSMDVAAFNK	Unambiguous	3	2	OCT63864.1;AAI06341.1		CID	1	0	1	1	83.1	5.33859e-08	0	21.971	18	2	1016.99	2032.97	-0.36413	130.223	15303	15303	MS2	13/174	170306_chiba_GST_02.raw
	High	ALGNYGPVNIEDTTGSAAK	Unambiguous	3	2	OCT63864.1;AAI06341.1		CID	1	0	1	1	80.85	1.20459e-07	0	1.39936	0	2	939.466	1877.92	-0.0828448	66.2944	6425	6425	MS2	13/184	170306_chiba_GST_02.raw
	High	SIQMDGLLWGSSK	Unambiguous	3	2	OCT63864.1;AAI06341.1		CID	1	0	1	1	79.99	1.68387e-07	0	8.17481	0	2	711.359	1421.71	0.684701	84.4244	9113	9113	MS2	20/138	170306_chiba_GST_02.raw
	High	KALGNYGPVNIEDTTGSAAK	Unambiguous	3	2	OCT63864.1;AAI06341.1		CID	1	0	1	1	78.14	2.32494e-07	1	1.0165	0	2	1003.51	2006.02	0.166204	52.5878	4284	4284	MS2	29/200	170306_chiba_GST_02.raw
	High	LQIQCVVEDDKVGTDVLEEK	Unambiguous	3	2	OCT63864.1;AAI06341.1		CID	1	0	1	1	78.04	2.00221e-07	1	20.8948	2	2	1130.57	2260.14	0.181357	77.9606	8178	8178	MS2	9/210	170306_chiba_GST_02.raw
	High	SIQMDGLLWGSSK	Unambiguous	3	2	OCT63864.1;AAI06341.1		CID	1	0	1	1	77.45	4.44321e-07	0	6.34393	0	2	711.358	1421.71	0.0836704	84.8574	9175	9175	MS2	10/138	170306_chiba_GST_02.raw
	High	KLQIQCVVEDDKVGTDVLEEK	Unambiguous	3	2	OCT63864.1;AAI06341.1		CID	1	0	1	1	76.62	2.54792e-07	2	8.83147	0	3	796.749	2388.23	0.268521	73.2509	7482	7482	MS2	27/222	170306_chiba_GST_02.raw
	High	ALGNYGPVNIEDTTGSAAK	Unambiguous	3	2	OCT63864.1;AAI06341.1		CID	1	0	1	1	75.67	4.05174e-07	0	3.0581	0	2	939.466	1877.92	0.372175	65.476	6300	6300	MS2	13/184	170306_chiba_GST_02.raw
	High	ITAFEDFVQSMDVAAFNKI	Unambiguous	3	2	OCT63864.1;AAI06341.1		CID	1	0	1	1	75	4.3007e-07	1	7.93184	1	3	716.023	2146.05	0.348351	123.339	14404	14404	MS2	15/182	170306_chiba_GST_02.raw
	High	ITAFEDFVQSMDVAAFNK	Unambiguous	3	2	OCT63864.1;AAI06341.1		CID	1	0	1	1	70.44	9.26241e-07	0	3.88523	0	3	678.328	2032.97	0.259732	112.333	12955	12955	MS2	13/174	170306_chiba_GST_02.raw
	High	ITAFEDFVQSMDVAAFNK	Unambiguous	3	2	OCT63864.1;AAI06341.1		CID	1	0	1	1	68.64	1.37457e-06	0	16.6718	2	3	678.328	2032.97	0.169665	115.866	13423	13423	MS2	12/174	170306_chiba_GST_02.raw
	High	KALGNYGPVNIEDTTGSAAK	Unambiguous	3	2	OCT63864.1;AAI06341.1		CID	1	0	1	1	64.56	5.30167e-06	1	7.8528	0	3	669.345	2006.02	0.311631	52.5523	4278	4278	MS2	22/200	170306_chiba_GST_02.raw
	High	ITAFEDFVQSMDVAAFNK	Unambiguous	3	2	OCT63864.1;AAI06341.1		CID	1	0	1	1	62.38	5.83877e-06	0	8.22635	0	3	678.328	2032.97	-0.0104715	113.921	13165	13165	MS2	17/174	170306_chiba_GST_02.raw
	High	ITAFEDFVQSMDVAAFNKI	Unambiguous	3	2	OCT63864.1;AAI06341.1		CID	1	0	1	1	60.92	1.1651e-05	1	7.61368	0	3	716.023	2146.05	0.689638	122.536	14300	14300	MS2	15/182	170306_chiba_GST_02.raw
	High	ITAFEDFVQSMDVAAFNK	Unambiguous	3	2	OCT63864.1;AAI06341.1		CID	1	0	1	1	59.29	1.18349e-05	0	2.76492	0	3	678.328	2032.97	0.169665	113.123	13060	13060	MS2	12/174	170306_chiba_GST_02.raw
	High	VLNEFLADK	Unambiguous	2	2	AAI06341.1;OCT63864.1		CID	1	0	1	1	59.2	1.95969e-05	0	16.3596	0	2	524.787	1048.57	-0.0791166	65.2031	6259	6259	MS2	7/84	170306_chiba_GST_02.raw
	High	VLNEFLADK	Unambiguous	2	2	AAI06341.1;OCT63864.1		CID	1	0	1	1	55.93	5.92227e-05	0	12.9583	0	2	524.787	1048.57	0.153716	65.8831	6361	6361	MS2	7/84	170306_chiba_GST_02.raw
	High	VLNEFLADK	Unambiguous	2	2	AAI06341.1;OCT63864.1		CID	1	0	1	1	54.43	5.87743e-05	0	58.8217	17	2	524.787	1048.57	-0.0791166	134.369	15824	15824	MS2	7/84	170306_chiba_GST_02.raw
	High	ITAFEDFVQSMDVAAFNK	Unambiguous	3	2	OCT63864.1;AAI06341.1		CID	1	0	1	1	53.83	4.1607e-05	0	18.5344	1	3	678.328	2032.97	0.169665	114.728	13272	13272	MS2	12/174	170306_chiba_GST_02.raw
	High	VLNEFLADK	Unambiguous	2	2	AAI06341.1;OCT63864.1		CID	1	0	1	1	51.47	0.000142571	0	43.6019	14	2	524.788	1048.57	0.502965	130.564	15346	15346	MS2	7/84	170306_chiba_GST_02.raw
	High	ALGNYGPVNIEDTTGSAAK	Unambiguous	3	2	OCT63864.1;AAI06341.1		CID	1	0	1	1	51.33	0.000110063	0	30.532	3	2	939.466	1877.92	0.50218	67.3429	6586	6586	MS2	12/184	170306_chiba_GST_02.raw
	High	ITAFEDFVQSMDVAAFNK	Unambiguous	3	2	OCT63864.1;AAI06341.1		CID	1	0	1	1	50.74	8.34901e-05	0	23.5832	1	3	678.328	2032.97	0.0795965	115.546	13381	13381	MS2	14/174	170306_chiba_GST_02.raw
	High	VLNEFLADK	Unambiguous	2	2	AAI06341.1;OCT63864.1		CID	1	0	1	1	50.68	0.000171013	0	61.4595	13	2	524.788	1048.57	0.502965	136.691	16118	16118	MS2	6/84	170306_chiba_GST_02.raw
	High	ITAFEDFVQSMDVAAFNK	Unambiguous	3	2	OCT63864.1;AAI06341.1		CID	1	0	1	1	50.34	9.57063e-05	0	37.3859	4	3	678.328	2032.97	0.439868	116.373	13490	13490	MS2	24/174	170306_chiba_GST_02.raw
	High	VLNEFLADK	Unambiguous	2	2	AAI06341.1;OCT63864.1		CID	1	0	1	1	47.31	0.000377134	0	59.0729	17	2	524.788	1048.57	0.386548	141.429	16709	16709	MS2	6/84	170306_chiba_GST_02.raw
	High	ITAFEDFVQSMDVAAFNK	Unambiguous	3	2	OCT63864.1;AAI06341.1		CID	1	0	1	1	43.53	0.000570037	0	49.6662	4	3	678.328	2032.97	0.890208	118.834	13812	13812	MS2	17/174	170306_chiba_GST_02.raw
	High	ITAFEDFVQSMDVAAFNKI	Unambiguous	3	2	OCT63864.1;AAI06341.1		CID	1	0	1	1	43	0.000664073	1	27.4895	12	2	1073.53	2146.05	-3.00139	128.524	15083	15083	MS2	13/182	170306_chiba_GST_02.raw
	High	ITAFEDFVQSMDVAAFNK	Unambiguous	3	2	OCT63864.1;AAI06341.1		CID	1	0	1	1	42.21	0.000748461	0	55.2123	5	3	678.328	2032.97	0.710072	117.174	13596	13596	MS2	10/174	170306_chiba_GST_02.raw
	High	LQIQCVVEDDKVGTDVLEEK	Unambiguous	3	2	OCT63864.1;AAI06341.1		CID	1	0	1	1	41.31	0.000850546	1	26.2495	0	3	754.051	2260.14	0.553478	77.6348	8129	8129	MS2	19/210	170306_chiba_GST_02.raw
	High	LAQYEAK	Unambiguous	3	2	OCT63864.1;AAI06341.1		CID	1	0	1	1	39.85	0.00172351	0	12.3045	0	2	411.721	822.436	-0.0326181	43.3646	2774	2774	MS2	6/56	170306_chiba_GST_02.raw
	High	ITAFEDFVQSMDVAAFNK	Unambiguous	3	2	OCT63864.1;AAI06341.1		CID	1	0	1	1	39.05	0.00127563	0	41.5081	4	3	678.328	2032.97	0.259732	118.591	13779	13779	MS2	21/174	170306_chiba_GST_02.raw
	High	VLNEFLADK	Unambiguous	2	2	AAI06341.1;OCT63864.1		CID	1	0	1	1	38.53	0.00280563	0	60.2359	14	2	524.788	1048.57	0.502965	142.201	16807	16807	MS2	10/84	170306_chiba_GST_02.raw
	High	ITAFEDFVQSMDVAAFNK	Unambiguous	3	2	OCT63864.1;AAI06341.1		CID	1	0	1	1	36.97	0.00249128	0	48.917	3	3	678.328	2032.97	0.529936	116.685	13531	13531	MS2	21/174	170306_chiba_GST_02.raw
	High	LVPVGYGIK	Unambiguous	21	4	OCT63864.1;AAI06341.1;AAH72139.1;NP_001084375.1		CID	1	0	1	1	36.37	0.00114184	0	3.89385	0	2	473.292	945.576	-0.442821	56.9592	4971	4971	MS2	4/66	170306_chiba_GST_02.raw
	High	SSILLDVKPWDDETDMGK	Unambiguous	3	2	OCT63864.1;AAI06341.1		CID	1	0	1	1	36.18	0.00351846	0	6.30359	0	3	683.667	2048.99	0.52689	81.7857	8733	8733	MS2	22/184	170306_chiba_GST_02.raw
	High	ITAFEDFVQSMDVAAFNK	Unambiguous	3	2	OCT63864.1;AAI06341.1		CID	1	0	1	1	35.33	0.00298951	0	52.3953	15	3	678.328	2032.97	-0.190608	132.206	15551	15551	MS2	10/174	170306_chiba_GST_02.raw
	High	SSILLDVKPWDDETDMGK	Unambiguous	3	2	OCT63864.1;AAI06341.1		CID	1	0	1	1	34.68	0.00462955	0	10.1797	0	3	683.667	2048.99	0.258798	81.3647	8672	8672	MS2	15/184	170306_chiba_GST_02.raw
	High	ITAFEDFVQSMDVAAFNK	Unambiguous	3	2	OCT63864.1;AAI06341.1		CID	1	0	1	1	34.29	0.00381701	0	55.2231	9	3	678.328	2032.97	0.3498	131.854	15507	15507	MS2	17/174	170306_chiba_GST_02.raw
	High	ITAFEDFVQSMDVAAFNK	Unambiguous	3	2	OCT63864.1;AAI06341.1		CID	1	0	1	1	33.03	0.00502714	0	26.8733	3	3	678.328	2032.97	-0.0104715	116.832	13551	13551	MS2	10/174	170306_chiba_GST_02.raw
	High	ITAFEDFVQSMDVAAFNK	Unambiguous	3	2	OCT63864.1;AAI06341.1		CID	1	0	1	1	32.56	0.00557399	0	35.4175	4	3	678.328	2032.97	0.169665	117.345	13618	13618	MS2	11/174	170306_chiba_GST_02.raw
	High	VLNEFLADK	Unambiguous	2	2	AAI06341.1;OCT63864.1		CID	1	0	1	1	32.32	0.0117228	0	68.0139	100	2	524.788	1048.57	0.502965	148.406	17474	17474	MS2	5/84	170306_chiba_GST_02.raw
	High	SYIEGYVPSQADVAVFNALSAAPPADLFHALR	Unambiguous	1	1	AAI06341.1		CID	1	0	1	1	31.84	0.00726646	0	11.4223	1	3	1130.58	3389.72	1.05515	114.395	13228	13228	MS2	20/342	170306_chiba_GST_02.raw
	High	ITAFEDFVQSMDVAAFNK	Unambiguous	3	2	OCT63864.1;AAI06341.1		CID	1	0	1	1	29.7	0.0115724	0	44.9272	7	3	678.328	2032.97	-0.280676	135.958	16028	16028	MS2	11/174	170306_chiba_GST_02.raw
	High	ITAFEDFVQSMDVAAFNK	Unambiguous	3	2	OCT63864.1;AAI06341.1		CID	1	0	1	1	29.62	0.0108053	0	54.2122	6	3	678.328	2032.97	0.0795965	118.497	13767	13767	MS2	21/174	170306_chiba_GST_02.raw
	High	WYNHIK	Unambiguous	3	2	OCT63864.1;AAI06341.1		CID	1	0	1	1	29.44	0.00608631	0	50.3695	0	2	430.724	860.442	0.249429	45.038	3053	3053	MS2	4/48	170306_chiba_GST_02.raw
	High	SIQMDGLLWGSSK	Unambiguous	3	2	OCT63864.1;AAI06341.1		CID	1	0	1	1	29.33	0.0231612	0	74.9319	2	2	711.358	1421.71	-0.689085	94.5524	10532	10532	MS2	10/138	170306_chiba_GST_02.raw
NP_001080656.1	eukaryotic translation elongation factor 2, gene 1 L homeolog [Xenopus laevis]	4748.5	51.52	4	10	38	104	858	95.3659	6.93213
	Confidence Level	Sequence	PSM Ambiguity	# Proteins	# Protein Groups	Protein Group Accessions	Modifications	Activation Type	ΔScore	ΔCn	Rank	Search Engine Rank	IonScore	Exp Value	# Missed Cleavages	Isolation Interference [%]	Ion Inject Time [ms]	Charge	m/z [Da]	MH+ [Da]	ΔM [ppm]	RT [min]	First Scan	Last Scan	MS Order	Ions Matched	Spectrum File
	High	IWCFGPDGSGPNILTDVTK	Unambiguous	3	2	NP_001080656.1;XP_018099006.1		CID	1	0	1	1	110.12	1.56126e-10	0	23.5288	1	2	1010.5	2019.99	0.545549	101.148	11444	11444	MS2	13/180	170306_chiba_GST_02.raw
	High	AYLPVNESFGFTADLR	Unambiguous	7	2	NP_001080656.1;XP_018099006.1		CID	1	0	1	1	100.43	1.24991e-09	0	3.68072	0	2	900.452	1799.9	0.303842	89.4567	9826	9826	MS2	13/154	170306_chiba_GST_02.raw
	High	STAISLFYELSENDLAFIK	Unambiguous	3	2	NP_001080656.1;XP_018099006.1		CID	1	0	1	1	99.01	1.69564e-09	0	25.2294	14	2	1081.06	2161.11	0.376674	126.013	14757	14757	MS2	11/182	170306_chiba_GST_02.raw
	High	TFCQLILDPIFK	Unambiguous	4	2	NP_001080656.1;XP_018099006.1		CID	1	0	1	1	98.33	1.60847e-09	0	56.8792	3	2	719.394	1437.78	0.221431	110.86	12760	12760	MS2	18/118	170306_chiba_GST_02.raw
	High	ALLELQLEPEALYQTFQR	Unambiguous	1	1	NP_001080656.1		CID	1	0	1	1	93.73	4.68125e-09	0	15.5789	2	2	1081.58	2162.15	-0.0294981	105.862	12083	12083	MS2	14/182	170306_chiba_GST_02.raw
	High	ALLELQLEPEALYQTFQR	Unambiguous	1	1	NP_001080656.1		CID	1	0	1	1	93.57	5.29648e-09	0	20.0483	2	2	1081.58	2162.15	0.422165	106.932	12230	12230	MS2	25/182	170306_chiba_GST_02.raw
	High	ALLELQLEPEALYQTFQR	Unambiguous	1	1	NP_001080656.1		CID	1	0	1	1	93.42	5.45986e-09	0	2.90846	0	2	1081.58	2162.15	0.647996	105.94	12093	12093	MS2	13/182	170306_chiba_GST_02.raw
	High	YVEPIEDVPCGNIVGLVGVDQYLVK	Unambiguous	1	1	NP_001080656.1		CID	1	0	1	1	91.75	1.00586e-08	0	15.1147	2	2	1359.71	2718.41	0.378428	108.286	12415	12415	MS2	15/252	170306_chiba_GST_02.raw
	High	GHVFEESQVAGTPMFVVK	Unambiguous	5	1	NP_001080656.1		CID	1	0	1	1	90.63	1.22393e-08	0	22.829	0	2	981.494	1961.98	0.430533	74.4933	7665	7665	MS2	24/170	170306_chiba_GST_02.raw
	High	STAISLFYELSENDLAFIK	Unambiguous	3	2	NP_001080656.1;XP_018099006.1		CID	1	0	1	1	86.01	3.58374e-08	0	11.7425	0	2	1081.06	2161.11	0.828554	121.897	14215	14215	MS2	11/182	170306_chiba_GST_02.raw
	High	STAISLFYELSENDLAFIK	Unambiguous	3	2	NP_001080656.1;XP_018099006.1		CID	1	0	1	1	85.56	3.09938e-08	0	7.29751	0	2	1081.06	2161.11	0.263704	122.69	14320	14320	MS2	11/182	170306_chiba_GST_02.raw
	High	STAISLFYELSENDLAFIK	Unambiguous	3	2	NP_001080656.1;XP_018099006.1		CID	1	0	1	1	83.91	5.48698e-08	0	21.7644	11	2	1081.06	2161.11	0.489644	126.279	14792	14792	MS2	11/182	170306_chiba_GST_02.raw
	High	STAISLFYELSENDLAFIK	Unambiguous	3	2	NP_001080656.1;XP_018099006.1		CID	1	0	1	1	82.46	8.11589e-08	0	35.6748	11	2	1081.06	2161.11	0.828554	125.498	14690	14690	MS2	10/182	170306_chiba_GST_02.raw
	High	ETVSEESSQMCLSK	Unambiguous	1	1	NP_001080656.1		CID	1	0	1	1	82.33	1.87133e-08	0	6.36214	0	2	779.342	1557.68	0.000206838	50.1028	3884	3884	MS2	11/138	170306_chiba_GST_02.raw
	High	STAISLFYELSENDLAFIK	Unambiguous	3	2	NP_001080656.1;XP_018099006.1		CID	1	0	1	1	82.11	8.79703e-08	0	20.1792	10	2	1081.06	2161.11	0.715584	125.684	14714	14714	MS2	10/182	170306_chiba_GST_02.raw
	High	STAISLFYELSENDLAFIK	Unambiguous	3	2	NP_001080656.1;XP_018099006.1		CID	1	0	1	1	82.06	8.02767e-08	0	36.5438	28	2	1081.06	2161.11	-0.188177	141.886	16767	16767	MS2	12/182	170306_chiba_GST_02.raw
	High	STAISLFYELSENDLAFIK	Unambiguous	3	2	NP_001080656.1;XP_018099006.1		CID	1	0	1	1	81.85	8.81726e-08	0	23.8337	4	2	1081.06	2161.11	0.489644	125.126	14640	14640	MS2	10/182	170306_chiba_GST_02.raw
	High	ALLELQLEPEALYQTFQR	Unambiguous	1	1	NP_001080656.1		CID	1	0	1	1	81.74	8.07211e-08	0	24.8862	1	2	1081.58	2162.15	0.422165	106.743	12204	12204	MS2	23/182	170306_chiba_GST_02.raw
	High	EGVSALDNFLDKL	Unambiguous	1	1	NP_001080656.1		CID	1	0	1	1	81.53	8.57748e-08	1	5.47128	0	2	710.87	1420.73	0.135115	107.165	12261	12261	MS2	9/124	170306_chiba_GST_02.raw
	High	ARPFPDGLAEDIDKGDVSAR	Unambiguous	3	2	NP_001080656.1;XP_018099006.1		CID	1	0	1	1	80.45	1.17204e-07	1	0	2	2	1065.03	2129.06	-0.113657	67.2238	6568	6568	MS2	15/212	170306_chiba_GST_02.raw
	High	ARPFPDGLAEDIDKGDVSAR	Unambiguous	3	2	NP_001080656.1;XP_018099006.1		CID	1	0	1	1	80.26	1.22446e-07	1	1.31309	0	3	710.359	2129.06	-0.0913049	67.9608	6678	6678	MS2	14/212	170306_chiba_GST_02.raw
	High	AYLPVNESFGFTADLR	Unambiguous	7	2	NP_001080656.1;XP_018099006.1		CID	1	0	1	1	79.49	1.55195e-07	0	40.7048	1	2	900.452	1799.9	0.236022	91.1754	10064	10064	MS2	13/154	170306_chiba_GST_02.raw
	High	STAISLFYELSENDLAFIK	Unambiguous	3	2	NP_001080656.1;XP_018099006.1		CID	1	0	1	1	78.26	1.87346e-07	0	17.0545	18	2	1081.06	2161.11	-0.301147	126.454	14815	14815	MS2	14/182	170306_chiba_GST_02.raw
	High	STAISLFYELSENDLAFIK	Unambiguous	3	2	NP_001080656.1;XP_018099006.1		CID	1	0	1	1	78.05	2.33446e-07	0	15.9989	11	2	1081.06	2161.11	2.07122	126.131	14773	14773	MS2	10/182	170306_chiba_GST_02.raw
	High	TGTISTFEHAHNMR	Unambiguous	1	1	NP_001080656.1		CID	1	0	1	1	77.64	1.61856e-07	0	0	0	2	801.379	1601.75	1.66893	46.0481	3223	3223	MS2	9/122	170306_chiba_GST_02.raw
	High	YVEPIEDVPCGNIVGLVGVDQYLVK	Unambiguous	1	1	NP_001080656.1		CID	1	0	1	1	77.13	2.74004e-07	0	7.90534	1	2	1359.71	2718.41	0.737668	109.21	12539	12539	MS2	14/252	170306_chiba_GST_02.raw
	High	ARPFPDGLAEDIDKGDVSAR	Unambiguous	3	2	NP_001080656.1;XP_018099006.1		CID	1	0	1	1	76.94	2.93338e-07	1	7.00373	1	2	1065.04	2129.06	0.918377	67.3031	6580	6580	MS2	24/212	170306_chiba_GST_02.raw
	High	STAISLFYELSENDLAFIK	Unambiguous	3	2	NP_001080656.1;XP_018099006.1		CID	1	0	1	1	76.71	2.85828e-07	0	25.145	4	2	1081.06	2161.11	0.602614	124.313	14533	14533	MS2	13/182	170306_chiba_GST_02.raw
	High	EGVSALDNFLDKL	Unambiguous	1	1	NP_001080656.1		CID	1	0	1	1	75.78	3.22374e-07	1	9.17837	0	2	710.87	1420.73	0.135115	107.925	12366	12366	MS2	11/124	170306_chiba_GST_02.raw
	High	WLPAGEALLQMITIHLPSPVTAQK	Unambiguous	1	1	NP_001080656.1		CID	1	0	1	1	74.18	2.11979e-07	0	1.43548	0	3	872.153	2614.45	0.976606	129.121	15159	15159	MS2	25/242	170306_chiba_GST_02.raw
	High	DSVVAGFQWATK	Unambiguous	7	2	NP_001080656.1;XP_018099006.1		CID	1	0	1	1	73.68	7.13533e-07	0	11.1194	0	2	654.833	1308.66	0.0240659	79.4768	8397	8397	MS2	18/116	170306_chiba_GST_02.raw
	High	ARPFPDGLAEDIDKGDVSAR	Unambiguous	3	2	NP_001080656.1;XP_018099006.1		CID	1	0	1	1	73.54	5.75365e-07	1	9.56792	0	3	710.359	2129.06	-0.0913049	66.3317	6431	6431	MS2	13/212	170306_chiba_GST_02.raw
	High	LMEPIYLVEIQCPEQVVGGIYGVLNR	Unambiguous	7	2	NP_001080656.1;XP_018099006.1		CID	1	0	1	1	73.37	5.77622e-07	0	21.8608	3	3	978.182	2932.53	0.33022	127.356	14931	14931	MS2	18/252	170306_chiba_GST_02.raw
	High	ARPFPDGLAEDIDKGDVSAR	Unambiguous	3	2	NP_001080656.1;XP_018099006.1		CID	1	0	1	1	73.34	5.56136e-07	1	4.72081	0	3	710.359	2129.06	0.0807009	67.1128	6550	6550	MS2	19/212	170306_chiba_GST_02.raw
	High	NMSVIAHVDHGK	Unambiguous	9	2	NP_001080656.1;XP_018099006.1		CID	1	0	1	1	72.56	8.84628e-07	0	22.7558	0	2	654.33	1307.65	0.352081	45.0211	3050	3050	MS2	13/122	170306_chiba_GST_02.raw
	High	YVEPIEDVPCGNIVGLVGVDQYLVK	Unambiguous	1	1	NP_001080656.1		CID	1	0	1	1	72.42	8.62058e-07	0	8.47211	0	2	1359.71	2718.41	0.378428	108.395	12429	12429	MS2	12/252	170306_chiba_GST_02.raw
	High	DLEEDHACIPIKK	Unambiguous	8	2	NP_001080656.1;XP_018099006.1		CID	1	0	1	1	72.05	1.11337e-06	1	5.31699	0	2	755.882	1510.76	0.353901	48.1609	3569	3569	MS2	11/106	170306_chiba_GST_02.raw
	High	STAISLFYELSENDLAFIK	Unambiguous	3	2	NP_001080656.1;XP_018099006.1		CID	1	0	1	1	70.71	1.14639e-06	0	10.1617	1	2	1081.06	2161.11	0.376674	123.511	14427	14427	MS2	10/182	170306_chiba_GST_02.raw
	High	EGVSALDNFLDKL	Unambiguous	1	1	NP_001080656.1		CID	1	0	1	1	68.31	2.42754e-06	1	35.9091	1	2	710.87	1420.73	-0.122647	108.9	12497	12497	MS2	9/124	170306_chiba_GST_02.raw
	High	VNFTVDQIR	Unambiguous	5	2	NP_001080656.1;XP_018099006.1		CID	1	0	1	1	66.03	3.79178e-06	0	9.53739	0	2	546.296	1091.58	-0.0303369	62.6595	5862	5862	MS2	8/82	170306_chiba_GST_02.raw
	High	LMEPIYLVEIQCPEQVVGGIYGVLNR	Unambiguous	7	2	NP_001080656.1;XP_018099006.1		CID	1	0	1	1	65.48	3.36936e-06	0	3.71089	6	2	1466.77	2932.53	0.855133	126.721	14849	14849	MS2	9/252	170306_chiba_GST_02.raw
	High	TFCQLILDPIFK	Unambiguous	4	2	NP_001080656.1;XP_018099006.1		CID	1	0	1	1	65	3.46269e-06	0	45.7959	3	2	719.395	1437.78	0.476136	112.434	12969	12969	MS2	9/118	170306_chiba_GST_02.raw
	High	ARPFPDGLAEDIDK	Unambiguous	7	2	NP_001080656.1;XP_018099006.1		CID	1	0	1	1	64.76	4.91267e-06	0	58.7469	3	2	772.392	1543.78	0.397166	67.5078	6610	6610	MS2	9/142	170306_chiba_GST_02.raw
	High	TFCQLILDPIFK	Unambiguous	4	2	NP_001080656.1;XP_018099006.1		CID	1	0	1	1	64.67	3.73606e-06	0	29.5859	1	2	719.394	1437.78	0.306333	111.566	12853	12853	MS2	9/118	170306_chiba_GST_02.raw
	High	VNFTVDQIR	Unambiguous	5	2	NP_001080656.1;XP_018099006.1		CID	1	0	1	1	64.5	9.43804e-06	0	6.75897	0	2	546.296	1091.58	0.305149	61.8687	5738	5738	MS2	8/82	170306_chiba_GST_02.raw
	High	YVEPIEDVPCGNIVGLVGVDQYLVK	Unambiguous	1	1	NP_001080656.1		CID	1	0	1	1	64.28	5.63608e-06	0	6.8207	0	3	906.807	2718.41	0.171408	108.25	12410	12410	MS2	28/252	170306_chiba_GST_02.raw
	High	TFCQLILDPIFK	Unambiguous	4	2	NP_001080656.1;XP_018099006.1		CID	1	0	1	1	63.37	6.65071e-06	0	56.089	10	2	719.394	1437.78	-0.203079	112.762	13013	13013	MS2	15/118	170306_chiba_GST_02.raw
	High	GPLMMYISK	Unambiguous	7	2	NP_001080656.1;XP_018099006.1		CID	1	0	1	1	63.23	6.08429e-06	0	19.4789	0	2	520.27	1039.53	0.822419	73.4859	7517	7517	MS2	6/64	170306_chiba_GST_02.raw
	High	LMEPIYLVEIQCPEQVVGGIYGVLNR	Unambiguous	7	2	NP_001080656.1;XP_018099006.1		CID	1	0	1	1	62.99	5.92764e-06	0	15.4062	2	3	978.182	2932.53	0.517538	126.357	14802	14802	MS2	20/252	170306_chiba_GST_02.raw
	High	STAISLFYELSENDLAFIK	Unambiguous	3	2	NP_001080656.1;XP_018099006.1		CID	1	0	1	1	62.51	6.56426e-06	0	44.4812	6	3	721.04	2161.11	0.200997	121.786	14201	14201	MS2	13/182	170306_chiba_GST_02.raw
	High	LMEPIYLVEIQCPEQVVGGIYGVLNR	Unambiguous	7	2	NP_001080656.1;XP_018099006.1		CID	1	0	1	1	61.91	7.6012e-06	0	40.0007	4	3	978.182	2932.53	0.579977	127.492	14949	14949	MS2	20/252	170306_chiba_GST_02.raw
	High	VLYACVLTAQPR	Unambiguous	1	1	NP_001080656.1		CID	1	0	1	1	61.76	9.03523e-06	0	13.0519	0	2	667.369	1333.73	0.321533	76.0828	7899	7899	MS2	10/92	170306_chiba_GST_02.raw
	High	ARPFPDGLAEDIDKGDVSAR	Unambiguous	3	2	NP_001080656.1;XP_018099006.1		CID	1	0	1	1	61.76	8.20172e-06	1	13.1585	1	3	710.359	2129.06	-0.005302	68.8355	6814	6814	MS2	22/212	170306_chiba_GST_02.raw
	High	DLEEDHACIPIK	Unambiguous	8	2	NP_001080656.1;XP_018099006.1		CID	1	0	1	1	61.06	1.20648e-05	0	3.025	0	2	691.834	1382.66	-0.320113	55.5189	4745	4745	MS2	8/96	170306_chiba_GST_02.raw
	High	STLTDSLVCK	Unambiguous	9	2	NP_001080656.1;XP_018099006.1		CID	1	0	1	1	60.53	1.51355e-05	0	48.327	1	2	533.776	1066.54	-0.078662	58.0755	5146	5146	MS2	8/82	170306_chiba_GST_02.raw
	High	STAISLFYELSENDLAFIK	Unambiguous	3	2	NP_001080656.1;XP_018099006.1		CID	1	0	1	1	60.26	1.10201e-05	0	7.38969	0	3	721.04	2161.11	0.116269	122.683	14319	14319	MS2	18/182	170306_chiba_GST_02.raw
	High	EGVSALDNFLDKL	Unambiguous	1	1	NP_001080656.1		CID	1	0	1	1	60.19	1.47886e-05	1	28.708	2	2	710.87	1420.73	0.908401	109.204	12538	12538	MS2	8/124	170306_chiba_GST_02.raw
	High	STAISLFYELSENDLAFIK	Unambiguous	3	2	NP_001080656.1;XP_018099006.1		CID	1	0	1	1	60.09	1.40067e-05	0	2.46029	0	3	721.041	2161.11	0.79409	121.89	14214	14214	MS2	20/182	170306_chiba_GST_02.raw
	High	YVEPIEDVPCGNIVGLVGVDQYLVK	Unambiguous	1	1	NP_001080656.1		CID	1	0	1	1	58.8	1.99057e-05	0	5.75055	0	3	906.807	2718.41	0.171408	109.034	12515	12515	MS2	17/252	170306_chiba_GST_02.raw
	High	ARPFPDGLAEDIDK	Unambiguous	7	2	NP_001080656.1;XP_018099006.1		CID	1	0	1	1	56.87	3.61837e-05	0	56.7646	2	2	772.391	1543.78	0.239021	67.3501	6587	6587	MS2	9/142	170306_chiba_GST_02.raw
	High	EGVSALDNFLDKL	Unambiguous	1	1	NP_001080656.1		CID	1	0	1	1	55.83	4.03579e-05	1	62.1847	18	2	710.87	1420.73	0.822481	122.498	14295	14295	MS2	10/124	170306_chiba_GST_02.raw
	High	ARPFPDGLAEDIDK	Unambiguous	7	2	NP_001080656.1;XP_018099006.1		CID	1	0	1	1	54.51	5.78786e-05	0	40.7087	4	2	772.391	1543.78	0.318093	68.4592	6755	6755	MS2	9/142	170306_chiba_GST_02.raw
	High	ARPFPDGLAEDIDK	Unambiguous	7	2	NP_001080656.1;XP_018099006.1		CID	1	0	1	1	54.01	6.29549e-05	0	27.216	1	2	772.391	1543.77	-0.314488	67.7362	6644	6644	MS2	9/142	170306_chiba_GST_02.raw
	High	EGVLCEENLR	Unambiguous	5	2	NP_001080656.1;XP_018099006.1		CID	1	0	1	1	53.98	3.05958e-05	0	19.3929	0	2	581.282	1161.56	0.123227	54.6953	4616	4616	MS2	8/88	170306_chiba_GST_02.raw
	High	YEWDVTEAR	Unambiguous	3	2	NP_001080656.1;XP_018099006.1		CID	1	0	1	1	52.14	2.6576e-05	0	7.41293	0	2	584.767	1168.53	-0.0583919	59.762	5409	5409	MS2	6/74	170306_chiba_GST_02.raw
	High	GVQYLNEIK	Unambiguous	8	2	NP_001080656.1;XP_018099006.1		CID	1	0	1	1	51.66	0.000122139	0	31.5438	0	2	532.293	1063.58	-0.322348	55.7896	4788	4788	MS2	7/76	170306_chiba_GST_02.raw
	High	IMGPNFTPGK	Unambiguous	3	2	NP_001080656.1;XP_018099006.1		CID	1	0	1	1	51.29	0.000112939	0	3.81318	0	2	531.276	1061.54	-0.156345	53.366	4406	4406	MS2	8/82	170306_chiba_GST_02.raw
	High	VFSGVVSTGLK	Unambiguous	2	1	NP_001080656.1		CID	1	0	1	1	51.27	7.09126e-05	0	36.6362	0	2	547.316	1093.63	0.157741	58.1556	5158	5158	MS2	8/90	170306_chiba_GST_02.raw
	High	WLPAGEALLQMITIHLPSPVTAQK	Unambiguous	1	1	NP_001080656.1		CID	1	0	1	1	48.93	7.29247e-05	0	8.83213	2	3	872.153	2614.44	0.346281	128.301	15054	15054	MS2	20/242	170306_chiba_GST_02.raw
	High	STAISLFYELSENDLAFIK	Unambiguous	3	2	NP_001080656.1;XP_018099006.1		CID	1	0	1	1	47.25	0.000224154	0	32.3797	19	2	1081.06	2161.11	-0.0752066	131.888	15511	15511	MS2	12/182	170306_chiba_GST_02.raw
	High	WLPAGEALLQMITIHLPSPVTAQK	Unambiguous	1	1	NP_001080656.1		CID	1	0	1	1	46.9	0.000116379	0	7.314	2	3	872.153	2614.44	0.206209	129.93	15265	15265	MS2	14/242	170306_chiba_GST_02.raw
	High	STAISLFYELSENDLAFIK	Unambiguous	3	2	NP_001080656.1;XP_018099006.1		CID	1	0	1	1	46.73	0.000286638	0	35.5046	3	3	721.041	2161.11	0.370452	124.321	14534	14534	MS2	11/182	170306_chiba_GST_02.raw
	High	KEDLYIKPIQR	Unambiguous	7	2	NP_001080656.1;XP_018099006.1		CID	1	0	1	1	46.13	0.000192587	1	12.6111	0	3	468.273	1402.81	0.239803	47.0667	3390	3390	MS2	14/102	170306_chiba_GST_02.raw
	High	DSVVAGFQWATK	Unambiguous	7	2	NP_001080656.1;XP_018099006.1		CID	1	0	1	1	46	0.000418229	0	40.8706	1	2	654.833	1308.66	0.0240659	80.3202	8520	8520	MS2	16/116	170306_chiba_GST_02.raw
	High	SDPVVSYR	Unambiguous	7	2	NP_001080656.1;XP_018099006.1		CID	1	0	1	1	45.98	0.00065232	0	10.9914	0	2	461.735	922.463	0.635516	46.2542	3258	3258	MS2	7/66	170306_chiba_GST_02.raw
	High	STAISLFYELSENDLAFIK	Unambiguous	3	2	NP_001080656.1;XP_018099006.1		CID	1	0	1	1	45.4	0.000412417	0	50.8235	19	2	1081.06	2161.11	0.715584	131.373	15447	15447	MS2	12/182	170306_chiba_GST_02.raw
	High	GEGQLAPSER	Unambiguous	1	1	NP_001080656.1		CID	1	0	1	1	44.78	0.000277771	0	12.3821	0	2	522.26	1043.51	0.559006	43.7143	2833	2833	MS2	7/98	170306_chiba_GST_02.raw
	High	STAISLFYELSENDLAFIK	Unambiguous	3	2	NP_001080656.1;XP_018099006.1		CID	1	0	1	1	44.57	0.000471339	0	17.4935	1	3	721.041	2161.11	0.370452	123.497	14425	14425	MS2	20/182	170306_chiba_GST_02.raw
	High	IMGPNFTPGK	Unambiguous	3	2	NP_001080656.1;XP_018099006.1		CID	1	0	1	1	44.1	0.000591349	0	14.2282	0	2	531.276	1061.54	0.0736415	54.2111	4539	4539	MS2	14/82	170306_chiba_GST_02.raw
	High	ARPFPDGLAEDIDK	Unambiguous	7	2	NP_001080656.1;XP_018099006.1		CID	1	0	1	1	44	0.000573274	0	42.783	2	2	772.392	1543.78	0.476238	68.2949	6730	6730	MS2	10/142	170306_chiba_GST_02.raw
	High	AYLPVNESFGFTADLR	Unambiguous	7	2	NP_001080656.1;XP_018099006.1		CID	1	0	1	1	43.93	0.000536063	0	64.5193	2	2	900.452	1799.9	0.10038	91.8081	10152	10152	MS2	10/154	170306_chiba_GST_02.raw
	High	KEDLYIKPIQR	Unambiguous	7	2	NP_001080656.1;XP_018099006.1		CID	1	0	1	1	43.65	0.0003409	1	27.1818	1	2	701.906	1402.81	0.184125	47.2128	3414	3414	MS2	6/102	170306_chiba_GST_02.raw
	High	KVEDMMK	Unambiguous	8	2	NP_001080656.1;XP_018099006.1		CID	1	0	1	1	43.58	0.000482384	1	6.11358	0	2	440.717	880.427	0.200109	44.0641	2892	2892	MS2	6/62	170306_chiba_GST_02.raw
	High	ALLELQLEPEALYQTFQR	Unambiguous	1	1	NP_001080656.1		CID	1	0	1	1	43.03	0.000552488	0	10.8315	1	3	721.388	2162.15	0.0771986	106.75	12205	12205	MS2	11/182	170306_chiba_GST_02.raw
	High	STAISLFYELSENDLAFIK	Unambiguous	3	2	NP_001080656.1;XP_018099006.1		CID	1	0	1	1	42.77	0.000713401	0	39.4695	3	3	721.041	2161.11	0.45518	124.785	14596	14596	MS2	32/182	170306_chiba_GST_02.raw
	High	VFDAIMNFK	Unambiguous	7	2	NP_001080656.1;XP_018099006.1		CID	1	0	1	1	42.35	0.000474414	0	4.45405	0	2	542.779	1084.55	0.419646	82.0715	8775	8775	MS2	6/68	170306_chiba_GST_02.raw
	High	TGTISTFEHAHNMR	Unambiguous	1	1	NP_001080656.1		CID	1	0	1	1	42.14	0.000507082	0	10.5814	0	3	534.588	1601.75	1.12706	45.9805	3211	3211	MS2	12/122	170306_chiba_GST_02.raw
	High	GPLMmYISK	Unambiguous	7	2	NP_001080656.1;XP_018099006.1	M5(Oxidation)	CID	1	0	1	1	40.79	0.000908712	0	62.8569	1	2	528.267	1055.53	-0.617574	63.0904	5930	5930	MS2	6/64	170306_chiba_GST_02.raw
	High	KEDLYIKPIQR	Unambiguous	7	2	NP_001080656.1;XP_018099006.1		CID	1	0	1	1	40.74	0.000691535	1	6.34309	0	3	468.273	1402.81	0.370331	47.6516	3484	3484	MS2	12/102	170306_chiba_GST_02.raw
	High	GPLmMYISK	Unambiguous	7	2	NP_001080656.1;XP_018099006.1	M4(Oxidation)	CID	1	0	1	2	40.62	0.000944988	0	62.8569	1	2	528.267	1055.53	-0.617574	63.0904	5930	5930	MS2	6/64	170306_chiba_GST_02.raw
	High	GVQYLNEIK	Unambiguous	8	2	NP_001080656.1;XP_018099006.1		CID	1	0	1	1	40.15	0.00212531	0	16.2623	0	2	532.293	1063.58	0.136745	56.5681	4910	4910	MS2	7/76	170306_chiba_GST_02.raw
	High	EGVSALDNFLDKL	Unambiguous	1	1	NP_001080656.1		CID	1	0	1	1	38.17	0.00220988	1	88.1107	30	2	710.871	1420.74	2.36905	131.204	15426	15426	MS2	10/124	170306_chiba_GST_02.raw
	High	VNFTVDQIR	Unambiguous	5	2	NP_001080656.1;XP_018099006.1		CID	1	0	1	1	37.44	0.00479603	0	61.4545	13	2	546.296	1091.58	0.19332	131.324	15441	15441	MS2	7/82	170306_chiba_GST_02.raw
	High	YFDPSNGK	Unambiguous	3	2	NP_001080656.1;XP_018099006.1		CID	1	0	1	1	36.7	0.000288625	0	43.2275	0	2	464.214	927.421	-0.0651695	45.528	3135	3135	MS2	7/64	170306_chiba_GST_02.raw
	High	GGGQIIPTAR	Unambiguous	9	3	NP_001080656.1;XP_018099006.1;NP_001079536.1		CID	1	0	1	1	36.47	0.00162305	0	4.15133	0	2	485.278	969.548	0.811901	47.7574	3501	3501	MS2	7/84	170306_chiba_GST_02.raw
	High	ARPFPDGLAEDIDK	Unambiguous	7	2	NP_001080656.1;XP_018099006.1		CID	1	0	1	1	35.73	0.00423672	0	18.5816	0	3	515.263	1543.77	-0.125516	67.5484	6616	6616	MS2	9/142	170306_chiba_GST_02.raw
	High	TILMMGR	Unambiguous	7	2	NP_001080656.1;XP_018099006.1		CID	1	0	1	1	35.66	0.00300167	0	32.7937	0	2	411.222	821.437	-0.382321	59.7969	5415	5415	MS2	5/48	170306_chiba_GST_02.raw
	High	FSVSPVVR	Unambiguous	8	2	NP_001080656.1;XP_018099006.1		CID	1	0	1	1	34.7	0.00540456	0	9.48139	0	2	445.758	890.509	-0.438511	54.1585	4530	4530	MS2	7/60	170306_chiba_GST_02.raw
	High	IMGPNFTPGKK	Unambiguous	3	2	NP_001080656.1;XP_018099006.1		CID	1	0	1	1	32.17	0.0104055	1	15.5109	0	3	397.218	1189.64	0.542403	47.9911	3541	3541	MS2	6/92	170306_chiba_GST_02.raw
	High	NMSVIAHVDHGK	Unambiguous	9	2	NP_001080656.1;XP_018099006.1		CID	1	0	1	1	31.26	0.00923989	0	18.6733	0	3	436.556	1307.65	0.481825	44.9735	3042	3042	MS2	13/122	170306_chiba_GST_02.raw
	High	GVQYLNEIKDSVVAGFQWATK	Unambiguous	7	2	NP_001080656.1;XP_018099006.1		CID	1	0	1	1	30.97	0.009638	1	36.755	2	3	785.078	2353.22	-0.0982859	105.87	12084	12084	MS2	17/222	170306_chiba_GST_02.raw
	High	STAISLFYELSENDLAFIK	Unambiguous	3	2	NP_001080656.1;XP_018099006.1		CID	1	0	1	1	30.31	0.0133148	0	42.0083	6	3	721.041	2161.11	0.79409	125.307	14664	14664	MS2	27/182	170306_chiba_GST_02.raw
	High	ImGPNFTPGK	Unambiguous	3	2	NP_001080656.1;XP_018099006.1	M2(Oxidation)	CID	1	0	1	1	30.22	0.0132134	0	43.821	0	2	539.274	1077.54	0.260186	49.4979	3785	3785	MS2	12/82	170306_chiba_GST_02.raw
	High	STAISLFYELSENDLAFIK	Unambiguous	3	2	NP_001080656.1;XP_018099006.1		CID	1	0	1	1	28.6	0.0186352	0	53.5421	8	3	721.041	2161.11	0.539907	125.46	14685	14685	MS2	21/182	170306_chiba_GST_02.raw
XP_018099006.1	PREDICTED: elongation factor 2 [Xenopus laevis]	4736.69	55.71	4	12	40	104	858	95.4619	6.82959
	Confidence Level	Sequence	PSM Ambiguity	# Proteins	# Protein Groups	Protein Group Accessions	Modifications	Activation Type	ΔScore	ΔCn	Rank	Search Engine Rank	IonScore	Exp Value	# Missed Cleavages	Isolation Interference [%]	Ion Inject Time [ms]	Charge	m/z [Da]	MH+ [Da]	ΔM [ppm]	RT [min]	First Scan	Last Scan	MS Order	Ions Matched	Spectrum File
	High	IWCFGPDGSGPNILTDVTK	Unambiguous	3	2	NP_001080656.1;XP_018099006.1		CID	1	0	1	1	110.12	1.56126e-10	0	23.5288	1	2	1010.5	2019.99	0.545549	101.148	11444	11444	MS2	13/180	170306_chiba_GST_02.raw
	High	AYLPVNESFGFTADLR	Unambiguous	7	2	NP_001080656.1;XP_018099006.1		CID	1	0	1	1	100.43	1.24991e-09	0	3.68072	0	2	900.452	1799.9	0.303842	89.4567	9826	9826	MS2	13/154	170306_chiba_GST_02.raw
	High	STAISLFYELSENDLAFIK	Unambiguous	3	2	NP_001080656.1;XP_018099006.1		CID	1	0	1	1	99.01	1.69564e-09	0	25.2294	14	2	1081.06	2161.11	0.376674	126.013	14757	14757	MS2	11/182	170306_chiba_GST_02.raw
	High	TFCQLILDPIFK	Unambiguous	4	2	NP_001080656.1;XP_018099006.1		CID	1	0	1	1	98.33	1.60847e-09	0	56.8792	3	2	719.394	1437.78	0.221431	110.86	12760	12760	MS2	18/118	170306_chiba_GST_02.raw
	High	GHVFEESQVAGTPMFIVK	Unambiguous	2	1	XP_018099006.1		CID	1	0	1	1	95.71	4.122e-09	0	1.85016	0	2	988.502	1976	0.970816	76.7773	8002	8002	MS2	25/170	170306_chiba_GST_02.raw
	High	ETVSEESNQMCLSK	Unambiguous	2	1	XP_018099006.1		CID	1	0	1	1	93.27	1.86036e-09	0	9.92777	0	2	792.848	1584.69	0.362804	48.9755	3701	3701	MS2	11/140	170306_chiba_GST_02.raw
	High	DGSGFLINLIDSPGHVDFSSEVTAALR	Unambiguous	3	1	XP_018099006.1		CID	1	0	1	1	91.43	1.08997e-08	0	7.75939	1	3	939.807	2817.41	0.472835	111.559	12852	12852	MS2	28/290	170306_chiba_GST_02.raw
	High	STAISLFYELSENDLAFIK	Unambiguous	3	2	NP_001080656.1;XP_018099006.1		CID	1	0	1	1	86.01	3.58374e-08	0	11.7425	0	2	1081.06	2161.11	0.828554	121.897	14215	14215	MS2	11/182	170306_chiba_GST_02.raw
	High	STAISLFYELSENDLAFIK	Unambiguous	3	2	NP_001080656.1;XP_018099006.1		CID	1	0	1	1	85.56	3.09938e-08	0	7.29751	0	2	1081.06	2161.11	0.263704	122.69	14320	14320	MS2	11/182	170306_chiba_GST_02.raw
	High	YVEPIEDVPCGNIVGLVGVDQFLVK	Unambiguous	5	1	XP_018099006.1		CID	1	0	1	1	85.2	4.56013e-08	0	3.80163	0	3	901.476	2702.41	0.476007	114.548	13248	13248	MS2	14/252	170306_chiba_GST_02.raw
	High	STAISLFYELSENDLAFIK	Unambiguous	3	2	NP_001080656.1;XP_018099006.1		CID	1	0	1	1	83.91	5.48698e-08	0	21.7644	11	2	1081.06	2161.11	0.489644	126.279	14792	14792	MS2	11/182	170306_chiba_GST_02.raw
	High	STAISLFYELSENDLAFIK	Unambiguous	3	2	NP_001080656.1;XP_018099006.1		CID	1	0	1	1	82.46	8.11589e-08	0	35.6748	11	2	1081.06	2161.11	0.828554	125.498	14690	14690	MS2	10/182	170306_chiba_GST_02.raw
	High	STAISLFYELSENDLAFIK	Unambiguous	3	2	NP_001080656.1;XP_018099006.1		CID	1	0	1	1	82.11	8.79703e-08	0	20.1792	10	2	1081.06	2161.11	0.715584	125.684	14714	14714	MS2	10/182	170306_chiba_GST_02.raw
	High	STAISLFYELSENDLAFIK	Unambiguous	3	2	NP_001080656.1;XP_018099006.1		CID	1	0	1	1	82.06	8.02767e-08	0	36.5438	28	2	1081.06	2161.11	-0.188177	141.886	16767	16767	MS2	12/182	170306_chiba_GST_02.raw
	High	STAISLFYELSENDLAFIK	Unambiguous	3	2	NP_001080656.1;XP_018099006.1		CID	1	0	1	1	81.85	8.81726e-08	0	23.8337	4	2	1081.06	2161.11	0.489644	125.126	14640	14640	MS2	10/182	170306_chiba_GST_02.raw
	High	EGVPALDNFLDKL	Unambiguous	2	1	XP_018099006.1		CID	1	0	1	1	81.45	1.23893e-07	1	26.8941	0	2	715.88	1430.75	0.483799	109.486	12576	12576	MS2	11/124	170306_chiba_GST_02.raw
	High	ARPFPDGLAEDIDKGDVSAR	Unambiguous	3	2	NP_001080656.1;XP_018099006.1		CID	1	0	1	1	80.45	1.17204e-07	1	0	2	2	1065.03	2129.06	-0.113657	67.2238	6568	6568	MS2	15/212	170306_chiba_GST_02.raw
	High	ARPFPDGLAEDIDKGDVSAR	Unambiguous	3	2	NP_001080656.1;XP_018099006.1		CID	1	0	1	1	80.26	1.22446e-07	1	1.31309	0	3	710.359	2129.06	-0.0913049	67.9608	6678	6678	MS2	14/212	170306_chiba_GST_02.raw
	High	AYLPVNESFGFTADLR	Unambiguous	7	2	NP_001080656.1;XP_018099006.1		CID	1	0	1	1	79.49	1.55195e-07	0	40.7048	1	2	900.452	1799.9	0.236022	91.1754	10064	10064	MS2	13/154	170306_chiba_GST_02.raw
	High	STAISLFYELSENDLAFIK	Unambiguous	3	2	NP_001080656.1;XP_018099006.1		CID	1	0	1	1	78.26	1.87346e-07	0	17.0545	18	2	1081.06	2161.11	-0.301147	126.454	14815	14815	MS2	14/182	170306_chiba_GST_02.raw
	High	STAISLFYELSENDLAFIK	Unambiguous	3	2	NP_001080656.1;XP_018099006.1		CID	1	0	1	1	78.05	2.33446e-07	0	15.9989	11	2	1081.06	2161.11	2.07122	126.131	14773	14773	MS2	10/182	170306_chiba_GST_02.raw
	High	ARPFPDGLAEDIDKGDVSAR	Unambiguous	3	2	NP_001080656.1;XP_018099006.1		CID	1	0	1	1	76.94	2.93338e-07	1	7.00373	1	2	1065.04	2129.06	0.918377	67.3031	6580	6580	MS2	24/212	170306_chiba_GST_02.raw
	High	STAISLFYELSENDLAFIK	Unambiguous	3	2	NP_001080656.1;XP_018099006.1		CID	1	0	1	1	76.71	2.85828e-07	0	25.145	4	2	1081.06	2161.11	0.602614	124.313	14533	14533	MS2	13/182	170306_chiba_GST_02.raw
	High	WLQAGEALLQMITIHLPSPVTAQK	Unambiguous	2	1	XP_018099006.1		CID	1	0	1	1	76.4	1.01944e-07	0	18.539	6	3	882.488	2645.45	0.614676	127.052	14892	14892	MS2	24/256	170306_chiba_GST_02.raw
	High	WLQAGEALLQMITIHLPSPVTAQK	Unambiguous	2	1	XP_018099006.1		CID	1	0	1	1	76.02	1.10015e-07	0	3.09286	1	3	882.488	2645.45	0.822321	125.254	14657	14657	MS2	22/256	170306_chiba_GST_02.raw
	High	ALLELQLEPEELYQTFQR	Unambiguous	3	1	XP_018099006.1		CID	1	0	1	1	74.59	5.33468e-07	0	12.7587	0	2	1110.58	2220.16	0.582012	105.481	12031	12031	MS2	12/182	170306_chiba_GST_02.raw
	High	YVEPIEDVPCGNIVGLVGVDQFLVK	Unambiguous	5	1	XP_018099006.1		CID	1	0	1	1	74.36	5.80804e-07	0	2.5497	0	2	1351.71	2702.41	0.209958	114.713	13270	13270	MS2	13/252	170306_chiba_GST_02.raw
	High	ALLELQLEPEELYQTFQR	Unambiguous	3	1	XP_018099006.1		CID	1	0	1	1	74.07	6.56168e-07	0	47.1279	2	3	740.723	2220.15	-0.193803	105.45	12027	12027	MS2	11/182	170306_chiba_GST_02.raw
	High	TGTITTFEHSHNMR	Unambiguous	2	1	XP_018099006.1		CID	0.5811	0	1	1	73.9	3.40163e-07	0	2.89005	0	2	816.384	1631.76	0.478137	45.7334	3170	3170	MS2	8/126	170306_chiba_GST_02.raw
	High	DSVVAGFQWATK	Unambiguous	7	2	NP_001080656.1;XP_018099006.1		CID	1	0	1	1	73.68	7.13533e-07	0	11.1194	0	2	654.833	1308.66	0.0240659	79.4768	8397	8397	MS2	18/116	170306_chiba_GST_02.raw
	High	ARPFPDGLAEDIDKGDVSAR	Unambiguous	3	2	NP_001080656.1;XP_018099006.1		CID	1	0	1	1	73.54	5.75365e-07	1	9.56792	0	3	710.359	2129.06	-0.0913049	66.3317	6431	6431	MS2	13/212	170306_chiba_GST_02.raw
	High	LMEPIYLVEIQCPEQVVGGIYGVLNR	Unambiguous	7	2	NP_001080656.1;XP_018099006.1		CID	1	0	1	1	73.37	5.77622e-07	0	21.8608	3	3	978.182	2932.53	0.33022	127.356	14931	14931	MS2	18/252	170306_chiba_GST_02.raw
	High	ARPFPDGLAEDIDKGDVSAR	Unambiguous	3	2	NP_001080656.1;XP_018099006.1		CID	1	0	1	1	73.34	5.56136e-07	1	4.72081	0	3	710.359	2129.06	0.0807009	67.1128	6550	6550	MS2	19/212	170306_chiba_GST_02.raw
	High	VLYACALTAQPR	Unambiguous	2	1	XP_018099006.1		CID	1	0	1	1	72.56	7.73703e-07	0	21.3471	0	2	653.353	1305.7	0.460219	68.6509	6785	6785	MS2	9/92	170306_chiba_GST_02.raw
	High	NMSVIAHVDHGK	Unambiguous	9	2	NP_001080656.1;XP_018099006.1		CID	1	0	1	1	72.56	8.84628e-07	0	22.7558	0	2	654.33	1307.65	0.352081	45.0211	3050	3050	MS2	13/122	170306_chiba_GST_02.raw
	High	DLEEDHACIPIKK	Unambiguous	8	2	NP_001080656.1;XP_018099006.1		CID	1	0	1	1	72.05	1.11337e-06	1	5.31699	0	2	755.882	1510.76	0.353901	48.1609	3569	3569	MS2	11/106	170306_chiba_GST_02.raw
	High	STAISLFYELSENDLAFIK	Unambiguous	3	2	NP_001080656.1;XP_018099006.1		CID	1	0	1	1	70.71	1.14639e-06	0	10.1617	1	2	1081.06	2161.11	0.376674	123.511	14427	14427	MS2	10/182	170306_chiba_GST_02.raw
	High	EGVPALDNFLDKL	Unambiguous	2	1	XP_018099006.1		CID	1	0	1	1	68.81	2.27534e-06	1	4.84025	0	2	715.88	1430.75	0.313161	108.705	12471	12471	MS2	9/124	170306_chiba_GST_02.raw
	High	DGSGFLINLIDSPGHVDFSSEVTAALR	Unambiguous	3	1	XP_018099006.1		CID	1	0	1	1	66.54	3.78202e-06	0	24.3619	2	3	939.805	2817.4	-1.54188	112.426	12968	12968	MS2	20/290	170306_chiba_GST_02.raw
	High	VNFTVDQIR	Unambiguous	5	2	NP_001080656.1;XP_018099006.1		CID	1	0	1	1	66.03	3.79178e-06	0	9.53739	0	2	546.296	1091.58	-0.0303369	62.6595	5862	5862	MS2	8/82	170306_chiba_GST_02.raw
	High	WLQAGEALLQMITIHLPSPVTAQK	Unambiguous	2	1	XP_018099006.1		CID	1	0	1	1	65.84	1.15974e-06	0	0.554122	1	3	882.488	2645.45	0.683891	126.037	14760	14760	MS2	22/256	170306_chiba_GST_02.raw
	High	LMEPIYLVEIQCPEQVVGGIYGVLNR	Unambiguous	7	2	NP_001080656.1;XP_018099006.1		CID	1	0	1	1	65.48	3.36936e-06	0	3.71089	6	2	1466.77	2932.53	0.855133	126.721	14849	14849	MS2	9/252	170306_chiba_GST_02.raw
	High	YVEPIEDVPCGNIVGLVGVDQFLVK	Unambiguous	5	1	XP_018099006.1		CID	1	0	1	1	65.28	4.63996e-06	0	11.6393	0	3	901.476	2702.41	0.340495	115.341	13353	13353	MS2	13/252	170306_chiba_GST_02.raw
	High	TFCQLILDPIFK	Unambiguous	4	2	NP_001080656.1;XP_018099006.1		CID	1	0	1	1	65	3.46269e-06	0	45.7959	3	2	719.395	1437.78	0.476136	112.434	12969	12969	MS2	9/118	170306_chiba_GST_02.raw
	High	ARPFPDGLAEDIDK	Unambiguous	7	2	NP_001080656.1;XP_018099006.1		CID	1	0	1	1	64.76	4.91267e-06	0	58.7469	3	2	772.392	1543.78	0.397166	67.5078	6610	6610	MS2	9/142	170306_chiba_GST_02.raw
	High	TFCQLILDPIFK	Unambiguous	4	2	NP_001080656.1;XP_018099006.1		CID	1	0	1	1	64.67	3.73606e-06	0	29.5859	1	2	719.394	1437.78	0.306333	111.566	12853	12853	MS2	9/118	170306_chiba_GST_02.raw
	High	VNFTVDQIR	Unambiguous	5	2	NP_001080656.1;XP_018099006.1		CID	1	0	1	1	64.5	9.43804e-06	0	6.75897	0	2	546.296	1091.58	0.305149	61.8687	5738	5738	MS2	8/82	170306_chiba_GST_02.raw
	High	TFCQLILDPIFK	Unambiguous	4	2	NP_001080656.1;XP_018099006.1		CID	1	0	1	1	63.37	6.65071e-06	0	56.089	10	2	719.394	1437.78	-0.203079	112.762	13013	13013	MS2	15/118	170306_chiba_GST_02.raw
	High	GPLMMYISK	Unambiguous	7	2	NP_001080656.1;XP_018099006.1		CID	1	0	1	1	63.23	6.08429e-06	0	19.4789	0	2	520.27	1039.53	0.822419	73.4859	7517	7517	MS2	6/64	170306_chiba_GST_02.raw
	High	WLQAGEALLQMITIHLPSPVTAQK	Unambiguous	2	1	XP_018099006.1		CID	1	0	1	1	63.14	2.62056e-06	0	28.7222	5	3	882.488	2645.45	0.060954	126.881	14870	14870	MS2	15/256	170306_chiba_GST_02.raw
	High	LMEPIYLVEIQCPEQVVGGIYGVLNR	Unambiguous	7	2	NP_001080656.1;XP_018099006.1		CID	1	0	1	1	62.99	5.92764e-06	0	15.4062	2	3	978.182	2932.53	0.517538	126.357	14802	14802	MS2	20/252	170306_chiba_GST_02.raw
	High	STAISLFYELSENDLAFIK	Unambiguous	3	2	NP_001080656.1;XP_018099006.1		CID	1	0	1	1	62.51	6.56426e-06	0	44.4812	6	3	721.04	2161.11	0.200997	121.786	14201	14201	MS2	13/182	170306_chiba_GST_02.raw
	High	LMEPIYLVEIQCPEQVVGGIYGVLNR	Unambiguous	7	2	NP_001080656.1;XP_018099006.1		CID	1	0	1	1	61.91	7.6012e-06	0	40.0007	4	3	978.182	2932.53	0.579977	127.492	14949	14949	MS2	20/252	170306_chiba_GST_02.raw
	High	ARPFPDGLAEDIDKGDVSAR	Unambiguous	3	2	NP_001080656.1;XP_018099006.1		CID	1	0	1	1	61.76	8.20172e-06	1	13.1585	1	3	710.359	2129.06	-0.005302	68.8355	6814	6814	MS2	22/212	170306_chiba_GST_02.raw
	High	YVEPIEDVPCGNIVGLVGVDQFLVK	Unambiguous	5	1	XP_018099006.1		CID	1	0	1	1	61.58	1.08771e-05	0	3.51889	3	2	1351.71	2702.41	0.390641	115.561	13383	13383	MS2	12/252	170306_chiba_GST_02.raw
	High	QFAEMYVTK	Unambiguous	2	1	XP_018099006.1		CID	1	0	1	1	61.36	5.41043e-06	0	10.2656	0	2	558.773	1116.54	-0.633576	55.1213	4683	4683	MS2	7/88	170306_chiba_GST_02.raw
	High	DLEEDHACIPIK	Unambiguous	8	2	NP_001080656.1;XP_018099006.1		CID	1	0	1	1	61.06	1.20648e-05	0	3.025	0	2	691.834	1382.66	-0.320113	55.5189	4745	4745	MS2	8/96	170306_chiba_GST_02.raw
	High	STLTDSLVCK	Unambiguous	9	2	NP_001080656.1;XP_018099006.1		CID	1	0	1	1	60.53	1.51355e-05	0	48.327	1	2	533.776	1066.54	-0.078662	58.0755	5146	5146	MS2	8/82	170306_chiba_GST_02.raw
	High	STAISLFYELSENDLAFIK	Unambiguous	3	2	NP_001080656.1;XP_018099006.1		CID	1	0	1	1	60.26	1.10201e-05	0	7.38969	0	3	721.04	2161.11	0.116269	122.683	14319	14319	MS2	18/182	170306_chiba_GST_02.raw
	High	STAISLFYELSENDLAFIK	Unambiguous	3	2	NP_001080656.1;XP_018099006.1		CID	1	0	1	1	60.09	1.40067e-05	0	2.46029	0	3	721.041	2161.11	0.79409	121.89	14214	14214	MS2	20/182	170306_chiba_GST_02.raw
	High	VFSGCVSTGLK	Unambiguous	2	1	XP_018099006.1		CID	1	0	1	1	58.9	1.91949e-05	0	15.3753	0	2	549.286	1097.57	-0.375325	53.8988	4490	4490	MS2	11/90	170306_chiba_GST_02.raw
	High	ARPFPDGLAEDIDK	Unambiguous	7	2	NP_001080656.1;XP_018099006.1		CID	1	0	1	1	56.87	3.61837e-05	0	56.7646	2	2	772.391	1543.78	0.239021	67.3501	6587	6587	MS2	9/142	170306_chiba_GST_02.raw
	High	ARPFPDGLAEDIDK	Unambiguous	7	2	NP_001080656.1;XP_018099006.1		CID	1	0	1	1	54.51	5.78786e-05	0	40.7087	4	2	772.391	1543.78	0.318093	68.4592	6755	6755	MS2	9/142	170306_chiba_GST_02.raw
	High	ARPFPDGLAEDIDK	Unambiguous	7	2	NP_001080656.1;XP_018099006.1		CID	1	0	1	1	54.01	6.29549e-05	0	27.216	1	2	772.391	1543.77	-0.314488	67.7362	6644	6644	MS2	9/142	170306_chiba_GST_02.raw
	High	EGVLCEENLR	Unambiguous	5	2	NP_001080656.1;XP_018099006.1		CID	1	0	1	1	53.98	3.05958e-05	0	19.3929	0	2	581.282	1161.56	0.123227	54.6953	4616	4616	MS2	8/88	170306_chiba_GST_02.raw
	High	YEWDVTEAR	Unambiguous	3	2	NP_001080656.1;XP_018099006.1		CID	1	0	1	1	52.14	2.6576e-05	0	7.41293	0	2	584.767	1168.53	-0.0583919	59.762	5409	5409	MS2	6/74	170306_chiba_GST_02.raw
	High	GVQYLNEIK	Unambiguous	8	2	NP_001080656.1;XP_018099006.1		CID	1	0	1	1	51.66	0.000122139	0	31.5438	0	2	532.293	1063.58	-0.322348	55.7896	4788	4788	MS2	7/76	170306_chiba_GST_02.raw
	High	IMGPNFTPGK	Unambiguous	3	2	NP_001080656.1;XP_018099006.1		CID	1	0	1	1	51.29	0.000112939	0	3.81318	0	2	531.276	1061.54	-0.156345	53.366	4406	4406	MS2	8/82	170306_chiba_GST_02.raw
	High	GHVFEESQVAGTPMFIVK	Unambiguous	2	1	XP_018099006.1		CID	1	0	1	1	49.55	0.000163603	0	6.25354	0	3	659.337	1976	0.747794	76.7498	7998	7998	MS2	20/170	170306_chiba_GST_02.raw
	High	TGTITTFEHSHNMR	Unambiguous	2	1	XP_018099006.1		CID	0.1837	0	1	1	48.63	0.000116525	0	3.8832	0	3	544.591	1631.76	0.133256	45.7066	3165	3165	MS2	15/126	170306_chiba_GST_02.raw
	High	STAISLFYELSENDLAFIK	Unambiguous	3	2	NP_001080656.1;XP_018099006.1		CID	1	0	1	1	47.25	0.000224154	0	32.3797	19	2	1081.06	2161.11	-0.0752066	131.888	15511	15511	MS2	12/182	170306_chiba_GST_02.raw
	High	EGVPALDNFLDKL	Unambiguous	2	1	XP_018099006.1		CID	1	0	1	1	46.82	0.000446095	1	29.6405	2	2	715.88	1430.75	-0.198752	107.998	12376	12376	MS2	8/124	170306_chiba_GST_02.raw
	High	STAISLFYELSENDLAFIK	Unambiguous	3	2	NP_001080656.1;XP_018099006.1		CID	1	0	1	1	46.73	0.000286638	0	35.5046	3	3	721.041	2161.11	0.370452	124.321	14534	14534	MS2	11/182	170306_chiba_GST_02.raw
	High	KEDLYLKPIQR	Unambiguous	7	2	NP_001080656.1;XP_018099006.1		CID	1	0	1	2	46.13	0.000192587	1	12.6111	0	3	468.273	1402.81	0.239803	47.0667	3390	3390	MS2	14/102	170306_chiba_GST_02.raw
	High	DSVVAGFQWATK	Unambiguous	7	2	NP_001080656.1;XP_018099006.1		CID	1	0	1	1	46	0.000418229	0	40.8706	1	2	654.833	1308.66	0.0240659	80.3202	8520	8520	MS2	16/116	170306_chiba_GST_02.raw
	High	SDPVVSYR	Unambiguous	7	2	NP_001080656.1;XP_018099006.1		CID	1	0	1	1	45.98	0.00065232	0	10.9914	0	2	461.735	922.463	0.635516	46.2542	3258	3258	MS2	7/66	170306_chiba_GST_02.raw
	High	STAISLFYELSENDLAFIK	Unambiguous	3	2	NP_001080656.1;XP_018099006.1		CID	1	0	1	1	45.4	0.000412417	0	50.8235	19	2	1081.06	2161.11	0.715584	131.373	15447	15447	MS2	12/182	170306_chiba_GST_02.raw
	High	STAISLFYELSENDLAFIK	Unambiguous	3	2	NP_001080656.1;XP_018099006.1		CID	1	0	1	1	44.57	0.000471339	0	17.4935	1	3	721.041	2161.11	0.370452	123.497	14425	14425	MS2	20/182	170306_chiba_GST_02.raw
	High	GEGQLAPAER	Unambiguous	2	1	XP_018099006.1		CID	1	0	1	1	44.3	0.000289797	0	10.1512	0	2	514.262	1027.52	0.128467	44.0857	2896	2896	MS2	8/98	170306_chiba_GST_02.raw
	High	IMGPNFTPGK	Unambiguous	3	2	NP_001080656.1;XP_018099006.1		CID	1	0	1	1	44.1	0.000591349	0	14.2282	0	2	531.276	1061.54	0.0736415	54.2111	4539	4539	MS2	14/82	170306_chiba_GST_02.raw
	High	ARPFPDGLAEDIDK	Unambiguous	7	2	NP_001080656.1;XP_018099006.1		CID	1	0	1	1	44	0.000573274	0	42.783	2	2	772.392	1543.78	0.476238	68.2949	6730	6730	MS2	10/142	170306_chiba_GST_02.raw
	High	AYLPVNESFGFTADLR	Unambiguous	7	2	NP_001080656.1;XP_018099006.1		CID	1	0	1	1	43.93	0.000536063	0	64.5193	2	2	900.452	1799.9	0.10038	91.8081	10152	10152	MS2	10/154	170306_chiba_GST_02.raw
	High	KEDLYLKPIQR	Unambiguous	7	2	NP_001080656.1;XP_018099006.1		CID	1	0	1	2	43.65	0.0003409	1	27.1818	1	2	701.906	1402.81	0.184125	47.2128	3414	3414	MS2	6/102	170306_chiba_GST_02.raw
	High	QFAEMYVTK	Unambiguous	2	1	XP_018099006.1		CID	1	0	1	1	43.59	0.000315016	0	35.9047	1	2	558.773	1116.54	-0.305588	55.9498	4814	4814	MS2	6/88	170306_chiba_GST_02.raw
	High	KVEDMMK	Unambiguous	8	2	NP_001080656.1;XP_018099006.1		CID	1	0	1	1	43.58	0.000482384	1	6.11358	0	2	440.717	880.427	0.200109	44.0641	2892	2892	MS2	6/62	170306_chiba_GST_02.raw
	High	STAISLFYELSENDLAFIK	Unambiguous	3	2	NP_001080656.1;XP_018099006.1		CID	1	0	1	1	42.77	0.000713401	0	39.4695	3	3	721.041	2161.11	0.45518	124.785	14596	14596	MS2	32/182	170306_chiba_GST_02.raw
	High	VFDAIMNFK	Unambiguous	7	2	NP_001080656.1;XP_018099006.1		CID	1	0	1	1	42.35	0.000474414	0	4.45405	0	2	542.779	1084.55	0.419646	82.0715	8775	8775	MS2	6/68	170306_chiba_GST_02.raw
	High	EGVPALDNFLDKL	Unambiguous	2	1	XP_018099006.1		CID	1	0	1	1	40.82	0.00177594	1	53.2682	1	2	715.88	1430.75	0.0572046	110.272	12682	12682	MS2	9/124	170306_chiba_GST_02.raw
	High	GPLMmYISK	Unambiguous	7	2	NP_001080656.1;XP_018099006.1	M5(Oxidation)	CID	1	0	1	1	40.79	0.000908712	0	62.8569	1	2	528.267	1055.53	-0.617574	63.0904	5930	5930	MS2	6/64	170306_chiba_GST_02.raw
	High	KEDLYLKPIQR	Unambiguous	7	2	NP_001080656.1;XP_018099006.1		CID	1	0	1	2	40.74	0.000691535	1	6.34309	0	3	468.273	1402.81	0.370331	47.6516	3484	3484	MS2	12/102	170306_chiba_GST_02.raw
	High	GPLmMYISK	Unambiguous	7	2	NP_001080656.1;XP_018099006.1	M4(Oxidation)	CID	1	0	1	2	40.62	0.000944988	0	62.8569	1	2	528.267	1055.53	-0.617574	63.0904	5930	5930	MS2	6/64	170306_chiba_GST_02.raw
	High	GVQYLNEIK	Unambiguous	8	2	NP_001080656.1;XP_018099006.1		CID	1	0	1	1	40.15	0.00212531	0	16.2623	0	2	532.293	1063.58	0.136745	56.5681	4910	4910	MS2	7/76	170306_chiba_GST_02.raw
	High	VNFTVDQIR	Unambiguous	5	2	NP_001080656.1;XP_018099006.1		CID	1	0	1	1	37.44	0.00479603	0	61.4545	13	2	546.296	1091.58	0.19332	131.324	15441	15441	MS2	7/82	170306_chiba_GST_02.raw
	High	YFDPSNGK	Unambiguous	3	2	NP_001080656.1;XP_018099006.1		CID	1	0	1	1	36.7	0.000288625	0	43.2275	0	2	464.214	927.421	-0.0651695	45.528	3135	3135	MS2	7/64	170306_chiba_GST_02.raw
	High	GGGQIIPTAR	Unambiguous	9	3	NP_001080656.1;XP_018099006.1;NP_001079536.1		CID	1	0	1	1	36.47	0.00162305	0	4.15133	0	2	485.278	969.548	0.811901	47.7574	3501	3501	MS2	7/84	170306_chiba_GST_02.raw
	High	ARPFPDGLAEDIDK	Unambiguous	7	2	NP_001080656.1;XP_018099006.1		CID	1	0	1	1	35.73	0.00423672	0	18.5816	0	3	515.263	1543.77	-0.125516	67.5484	6616	6616	MS2	9/142	170306_chiba_GST_02.raw
	High	TILMMGR	Unambiguous	7	2	NP_001080656.1;XP_018099006.1		CID	1	0	1	1	35.66	0.00300167	0	32.7937	0	2	411.222	821.437	-0.382321	59.7969	5415	5415	MS2	5/48	170306_chiba_GST_02.raw
	High	FSVSPVVR	Unambiguous	8	2	NP_001080656.1;XP_018099006.1		CID	1	0	1	1	34.7	0.00540456	0	9.48139	0	2	445.758	890.509	-0.438511	54.1585	4530	4530	MS2	7/60	170306_chiba_GST_02.raw
	High	IMGPNFTPGKK	Unambiguous	3	2	NP_001080656.1;XP_018099006.1		CID	1	0	1	1	32.17	0.0104055	1	15.5109	0	3	397.218	1189.64	0.542403	47.9911	3541	3541	MS2	6/92	170306_chiba_GST_02.raw
	High	NMSVIAHVDHGK	Unambiguous	9	2	NP_001080656.1;XP_018099006.1		CID	1	0	1	1	31.26	0.00923989	0	18.6733	0	3	436.556	1307.65	0.481825	44.9735	3042	3042	MS2	13/122	170306_chiba_GST_02.raw
	High	GVQYLNEIKDSVVAGFQWATK	Unambiguous	7	2	NP_001080656.1;XP_018099006.1		CID	1	0	1	1	30.97	0.009638	1	36.755	2	3	785.078	2353.22	-0.0982859	105.87	12084	12084	MS2	17/222	170306_chiba_GST_02.raw
	High	STAISLFYELSENDLAFIK	Unambiguous	3	2	NP_001080656.1;XP_018099006.1		CID	1	0	1	1	30.31	0.0133148	0	42.0083	6	3	721.041	2161.11	0.79409	125.307	14664	14664	MS2	27/182	170306_chiba_GST_02.raw
	High	ImGPNFTPGK	Unambiguous	3	2	NP_001080656.1;XP_018099006.1	M2(Oxidation)	CID	1	0	1	1	30.22	0.0132134	0	43.821	0	2	539.274	1077.54	0.260186	49.4979	3785	3785	MS2	12/82	170306_chiba_GST_02.raw
	High	STAISLFYELSENDLAFIK	Unambiguous	3	2	NP_001080656.1;XP_018099006.1		CID	1	0	1	1	28.6	0.0186352	0	53.5421	8	3	721.041	2161.11	0.539907	125.46	14685	14685	MS2	21/182	170306_chiba_GST_02.raw
NP_001085830.1	ErbB3-binding protein 1 [Xenopus laevis]	4411.92	58.97	1	4	19	120	390	43.4431	6.80029
	Confidence Level	Sequence	PSM Ambiguity	# Proteins	# Protein Groups	Protein Group Accessions	Modifications	Activation Type	ΔScore	ΔCn	Rank	Search Engine Rank	IonScore	Exp Value	# Missed Cleavages	Isolation Interference [%]	Ion Inject Time [ms]	Charge	m/z [Da]	MH+ [Da]	ΔM [ppm]	RT [min]	First Scan	Last Scan	MS Order	Ions Matched	Spectrum File
	High	AEFEVHEVYAVDVLISTGEGK	Unambiguous	3	2	NP_001083993.1;NP_001085830.1		CID	1	0	1	1	125.9	4.80664e-12	0	49.1769	13	2	1146.57	2292.14	-0.456328	114.047	13182	13182	MS2	26/194	170306_chiba_GST_02.raw
	High	TLLDTATAGASLLNLCEK	Unambiguous	1	1	NP_001085830.1		CID	1	0	1	1	115.62	3.52292e-11	0	5.69064	0	2	917.485	1833.96	0.379072	100.981	11421	11421	MS2	12/176	170306_chiba_GST_02.raw
	High	AEFEVHEVYAVDVLISTGEGK	Unambiguous	3	2	NP_001083993.1;NP_001085830.1		CID	1	0	1	1	108.63	2.68007e-10	0	37.4681	31	2	1146.57	2292.14	1.14135	144.014	17037	17037	MS2	24/194	170306_chiba_GST_02.raw
	High	TLLDTATAGASLLNLCEK	Unambiguous	1	1	NP_001085830.1		CID	1	0	1	1	100.51	1.18708e-09	0	3.32426	0	2	917.485	1833.96	-0.0868541	100.218	11316	11316	MS2	13/176	170306_chiba_GST_02.raw
	High	IDLGVHVDGFIANVAHSFVVGASK	Unambiguous	3	2	NP_001083993.1;NP_001085830.1		CID	1	0	1	1	97.19	2.17723e-09	0	19.2118	2	2	1226.65	2452.3	0.87404	107.591	12320	12320	MS2	15/248	170306_chiba_GST_02.raw
	High	HELLQPFNVLYEK	Unambiguous	3	2	NP_001083993.1;NP_001085830.1		CID	1	0	1	1	87.57	2.85225e-08	0	22.4228	1	2	815.436	1629.86	0.749996	81.5959	8706	8706	MS2	22/132	170306_chiba_GST_02.raw
	High	IDLGVHVDGFIANVAHSFVVGASK	Unambiguous	3	2	NP_001083993.1;NP_001085830.1		CID	1	0	1	1	84.97	3.64591e-08	0	9.21189	1	2	1226.65	2452.3	0.973595	107.389	12292	12292	MS2	15/248	170306_chiba_GST_02.raw
	High	TLLDTATAGASLLNLCEK	Unambiguous	1	1	NP_001085830.1		CID	1	0	1	1	84.02	5.09217e-08	0	16.7484	0	3	611.993	1833.96	0.30518	100.988	11422	11422	MS2	13/176	170306_chiba_GST_02.raw
	High	ITSGPFEPDLYK	Unambiguous	3	2	NP_001083993.1;NP_001085830.1		CID	1	0	1	1	79	2.07093e-07	0	10.5	0	2	683.848	1366.69	0.305375	72.3837	7350	7350	MS2	9/102	170306_chiba_GST_02.raw
	High	GDAMIMEETGK	Unambiguous	3	2	NP_001083993.1;NP_001085830.1		CID	1	0	1	1	78.28	4.82929e-08	0	6.8451	0	2	591.262	1181.52	-0.226528	49.9566	3859	3859	MS2	9/94	170306_chiba_GST_02.raw
	High	SELEVQDSELK	Unambiguous	3	2	NP_001083993.1;NP_001085830.1		CID	1	0	1	1	74.43	3.51564e-07	0	8.32551	0	2	638.817	1276.63	-0.0036948	50.5937	3964	3964	MS2	9/106	170306_chiba_GST_02.raw
	High	HELLQPFNVLYEK	Unambiguous	3	2	NP_001083993.1;NP_001085830.1		CID	1	0	1	1	70.94	9.18131e-07	0	25.7516	1	2	815.436	1629.86	0.525308	82.4293	8829	8829	MS2	9/132	170306_chiba_GST_02.raw
	High	LVKPGNQNTQVTEAWNK	Unambiguous	1	1	NP_001085830.1		CID	1	0	1	1	69.83	1.61708e-06	0	0	0	2	964.006	1927	0.729096	47.6861	3490	3490	MS2	13/164	170306_chiba_GST_02.raw
	High	IDLGVHVDGFIANVAHSFVVGASK	Unambiguous	3	2	NP_001083993.1;NP_001085830.1		CID	1	0	1	1	69.77	1.22309e-06	0	3.80558	0	3	818.105	2452.3	0.569889	107.171	12262	12262	MS2	14/248	170306_chiba_GST_02.raw
	High	AEFEVHEVYAVDVLISTGEGK	Unambiguous	3	2	NP_001083993.1;NP_001085830.1		CID	1	0	1	1	67.2	3.44888e-06	0	8.44219	3	3	764.718	2292.14	0.469787	136.061	16041	16041	MS2	15/194	170306_chiba_GST_02.raw
	High	ITSGPFEPDLYKSELEVQDSELK	Unambiguous	3	2	NP_001083993.1;NP_001085830.1		CID	1	0	1	1	66.81	3.13716e-06	1	35.6587	1	3	875.437	2624.3	-0.0448331	80.7113	8577	8577	MS2	18/236	170306_chiba_GST_02.raw
	High	TIIQNPTDQQK	Unambiguous	3	2	NP_001083993.1;NP_001085830.1		CID	1	0	1	1	66.39	2.76686e-06	0	3.4635	0	2	643.342	1285.68	1.44669	46.0316	3220	3220	MS2	9/108	170306_chiba_GST_02.raw
	High	FTVLLMPNGPMR	Unambiguous	3	2	NP_001083993.1;NP_001085830.1		CID	1	0	1	1	65.84	4.03954e-06	0	29.1275	1	2	688.365	1375.72	-0.340042	87.1335	9496	9496	MS2	10/96	170306_chiba_GST_02.raw
	High	AEFEVHEVYAVDVLISTGEGK	Unambiguous	3	2	NP_001083993.1;NP_001085830.1		CID	1	0	1	1	65.4	5.66712e-06	0	8.14572	1	3	764.718	2292.14	0.549671	127.837	14994	14994	MS2	15/194	170306_chiba_GST_02.raw
	High	TLLDTATAGASLLNLCEK	Unambiguous	1	1	NP_001085830.1		CID	1	0	1	1	64.21	5.86042e-06	0	21.393	0	3	611.992	1833.96	-0.39371	100.232	11318	11318	MS2	11/176	170306_chiba_GST_02.raw
	High	MGGDIANR	Unambiguous	3	2	NP_001083993.1;NP_001085830.1		CID	1	0	1	1	64.04	2.09062e-06	0	16.9535	0	2	417.201	833.394	0.303646	43.7093	2832	2832	MS2	7/58	170306_chiba_GST_02.raw
	High	AEFEVHEVYAVDVLISTGEGK	Unambiguous	3	2	NP_001083993.1;NP_001085830.1		CID	1	0	1	1	63.72	8.34377e-06	0	8.2247	2	3	764.719	2292.14	0.629555	127.022	14888	14888	MS2	15/194	170306_chiba_GST_02.raw
	High	AEFEVHEVYAVDVLISTGEGK	Unambiguous	3	2	NP_001083993.1;NP_001085830.1		CID	1	0	1	1	63.1	9.47722e-06	0	31.1596	2	3	764.719	2292.14	0.869207	129.135	15161	15161	MS2	18/194	170306_chiba_GST_02.raw
	High	AEFEVHEVYAVDVLISTGEGK	Unambiguous	3	2	NP_001083993.1;NP_001085830.1		CID	1	0	1	1	62.5	1.01784e-05	0	7.47645	2	3	764.718	2292.14	0.469787	134.085	15789	15789	MS2	18/194	170306_chiba_GST_02.raw
	High	AEFEVHEVYAVDVLISTGEGK	Unambiguous	3	2	NP_001083993.1;NP_001085830.1		CID	1	0	1	1	61.58	1.36572e-05	0	11.9601	2	3	764.718	2292.14	0.549671	141.96	16776	16776	MS2	20/194	170306_chiba_GST_02.raw
	High	ITSGPFEPDLYK	Unambiguous	3	2	NP_001083993.1;NP_001085830.1		CID	1	0	1	1	61.37	1.19996e-05	0	13.5001	0	2	683.848	1366.69	0.305375	71.5387	7221	7221	MS2	8/102	170306_chiba_GST_02.raw
	High	AEFEVHEVYAVDVLISTGEGK	Unambiguous	3	2	NP_001083993.1;NP_001085830.1		CID	1	0	1	1	61.01	1.43443e-05	0	8.90927	2	3	764.718	2292.14	0.469787	132.433	15580	15580	MS2	15/194	170306_chiba_GST_02.raw
	High	IDLGVHVDGFIANVAHSFVVGASK	Unambiguous	3	2	NP_001083993.1;NP_001085830.1		CID	1	0	1	1	60.36	1.07232e-05	0	13.8723	0	3	818.104	2452.3	-0.102112	107.932	12367	12367	MS2	16/248	170306_chiba_GST_02.raw
	High	SDQDYLLK	Unambiguous	3	2	NP_001083993.1;NP_001085830.1		CID	1	0	1	1	60.06	2.8109e-05	0	14.9415	0	2	491.248	981.489	0.347437	52.4276	4258	4258	MS2	11/72	170306_chiba_GST_02.raw
	High	SGDEEQQEQTIAEDLVVTK	Unambiguous	2	2	NP_001085830.1;NP_001083993.1		CID	1	0	1	1	59.12	1.21849e-05	0	14.5061	1	2	1060.01	2119.01	1.1042	76.1454	7909	7909	MS2	13/204	170306_chiba_GST_02.raw
	High	AEFEVHEVYAVDVLISTGEGK	Unambiguous	3	2	NP_001083993.1;NP_001085830.1		CID	1	0	1	1	57.33	3.37492e-05	0	6.63998	2	3	764.718	2292.14	0.150251	130.745	15369	15369	MS2	21/194	170306_chiba_GST_02.raw
	High	AEFEVHEVYAVDVLISTGEGK	Unambiguous	3	2	NP_001083993.1;NP_001085830.1		CID	1	0	1	1	57.17	3.47279e-05	0	19.1802	2	3	764.718	2292.14	0.469787	114.583	13253	13253	MS2	10/194	170306_chiba_GST_02.raw
	High	AEFEVHEVYAVDVLISTGEGK	Unambiguous	3	2	NP_001083993.1;NP_001085830.1		CID	1	0	1	1	56.94	3.91454e-05	0	13.2637	34	3	764.718	2292.14	-0.00951758	148.15	17453	17453	MS2	14/194	170306_chiba_GST_02.raw
	High	AEFEVHEVYAVDVLISTGEGK	Unambiguous	3	2	NP_001083993.1;NP_001085830.1		CID	1	0	1	1	56.89	3.92917e-05	0	9.03605	2	3	764.718	2292.14	0.0703665	133.249	15684	15684	MS2	19/194	170306_chiba_GST_02.raw
	High	AEFEVHEVYAVDVLISTGEGK	Unambiguous	3	2	NP_001083993.1;NP_001085830.1		CID	1	0	1	1	55.99	4.72064e-05	0	20.3056	1	3	764.718	2292.14	-0.408938	98.3368	11060	11060	MS2	7/194	170306_chiba_GST_02.raw
	High	AFFSEVER	Unambiguous	3	2	NP_001083993.1;NP_001085830.1		CID	1	0	1	1	55.78	3.42192e-05	0	27.0019	1	2	492.743	984.479	0.549773	61.226	5637	5637	MS2	7/62	170306_chiba_GST_02.raw
	High	AFFSEVER	Unambiguous	3	2	NP_001083993.1;NP_001085830.1		CID	1	0	1	1	55.43	1.56098e-05	0	2.51674	0	2	492.743	984.478	-0.752173	61.9974	5758	5758	MS2	7/62	170306_chiba_GST_02.raw
	High	AEFEVHEVYAVDVLISTGEGK	Unambiguous	3	2	NP_001083993.1;NP_001085830.1		CID	1	0	1	1	54.41	6.5566e-05	0	18.0642	2	3	764.718	2292.14	0.469787	141.147	16674	16674	MS2	19/194	170306_chiba_GST_02.raw
	High	AEFEVHEVYAVDVLISTGEGK	Unambiguous	3	2	NP_001083993.1;NP_001085830.1		CID	1	0	1	1	53.87	8.06051e-05	0	20.2188	1	3	764.719	2292.14	0.629555	108.113	12392	12392	MS2	13/194	170306_chiba_GST_02.raw
	High	AEFEVHEVYAVDVLISTGEGK	Unambiguous	3	2	NP_001083993.1;NP_001085830.1		CID	1	0	1	1	52.84	9.51593e-05	0	5.26969	3	3	764.718	2292.14	0.310019	136.917	16146	16146	MS2	19/194	170306_chiba_GST_02.raw
	High	AEFEVHEVYAVDVLISTGEGK	Unambiguous	3	2	NP_001083993.1;NP_001085830.1		CID	1	0	1	1	52.16	0.000117674	0	16.8096	1	3	764.719	2292.14	0.869207	115.03	13313	13313	MS2	17/194	170306_chiba_GST_02.raw
	High	AEFEVHEVYAVDVLISTGEGK	Unambiguous	3	2	NP_001083993.1;NP_001085830.1		CID	1	0	1	1	51.92	0.000120504	0	14.0312	2	3	764.718	2292.14	-0.648591	112.656	12999	12999	MS2	12/194	170306_chiba_GST_02.raw
	High	AEFEVHEVYAVDVLISTGEGK	Unambiguous	3	2	NP_001083993.1;NP_001085830.1		CID	1	0	1	1	51.84	0.000119798	0	12.2806	1	3	764.718	2292.14	0.389903	98.7775	11120	11120	MS2	14/194	170306_chiba_GST_02.raw
	High	AEFEVHEVYAVDVLISTGEGK	Unambiguous	3	2	NP_001083993.1;NP_001085830.1		CID	1	0	1	1	50.95	0.000146644	0	9.66193	3	3	764.718	2292.14	0.150251	140.292	16567	16567	MS2	13/194	170306_chiba_GST_02.raw
	High	AEFEVHEVYAVDVLISTGEGK	Unambiguous	3	2	NP_001083993.1;NP_001085830.1		CID	1	0	1	1	50.68	0.000156905	0	9.49305	14	3	764.719	2292.14	1.26863	146.148	17259	17259	MS2	12/194	170306_chiba_GST_02.raw
	High	AEFEVHEVYAVDVLISTGEGK	Unambiguous	3	2	NP_001083993.1;NP_001085830.1		CID	1	0	1	1	50.35	0.000177134	0	10.4488	3	3	764.718	2292.14	0.0703665	138.628	16358	16358	MS2	23/194	170306_chiba_GST_02.raw
	High	AEFEVHEVYAVDVLISTGEGK	Unambiguous	3	2	NP_001083993.1;NP_001085830.1		CID	1	0	1	1	50.26	0.000171895	0	10.4414	1	3	764.718	2292.14	0.150251	106.606	12185	12185	MS2	13/194	170306_chiba_GST_02.raw
	High	AEFEVHEVYAVDVLISTGEGK	Unambiguous	3	2	NP_001083993.1;NP_001085830.1		CID	1	0	1	1	49.77	0.000199806	0	14.1089	1	3	764.719	2292.14	0.709439	117.256	13606	13606	MS2	11/194	170306_chiba_GST_02.raw
	High	AEFEVHEVYAVDVLISTGEGK	Unambiguous	3	2	NP_001083993.1;NP_001085830.1		CID	1	0	1	1	49.74	0.000205438	0	27.4533	1	3	764.719	2292.14	1.02897	116.945	13566	13566	MS2	10/194	170306_chiba_GST_02.raw
	High	AEFEVHEVYAVDVLISTGEGK	Unambiguous	3	2	NP_001083993.1;NP_001085830.1		CID	1	0	1	1	49.69	0.00019654	0	42.0355	2	3	764.718	2292.14	0.230135	103.215	11724	11724	MS2	10/194	170306_chiba_GST_02.raw
	High	AEFEVHEVYAVDVLISTGEGK	Unambiguous	3	2	NP_001083993.1;NP_001085830.1		CID	1	0	1	1	49.41	0.000209629	0	13.1748	1	3	764.718	2292.14	0.310019	107.402	12294	12294	MS2	19/194	170306_chiba_GST_02.raw
	High	AEFEVHEVYAVDVLISTGEGK	Unambiguous	3	2	NP_001083993.1;NP_001085830.1		CID	1	0	1	1	49.12	0.000224105	0	23.5531	2	3	764.718	2292.14	0.310019	125.407	14678	14678	MS2	26/194	170306_chiba_GST_02.raw
	High	AEFEVHEVYAVDVLISTGEGK	Unambiguous	3	2	NP_001083993.1;NP_001085830.1		CID	1	0	1	1	49.08	0.00022556	0	18.3275	3	3	764.718	2292.14	0.150251	137.787	16253	16253	MS2	19/194	170306_chiba_GST_02.raw
	High	AEFEVHEVYAVDVLISTGEGK	Unambiguous	3	2	NP_001083993.1;NP_001085830.1		CID	1	0	1	1	48.89	0.000233711	0	19.0382	1	3	764.718	2292.14	0.469787	123.525	14429	14429	MS2	17/194	170306_chiba_GST_02.raw
	High	AEFEVHEVYAVDVLISTGEGK	Unambiguous	3	2	NP_001083993.1;NP_001085830.1		CID	1	0	1	1	48.85	0.000252163	0	9.87481	2	3	764.719	2292.14	0.789323	126.211	14783	14783	MS2	20/194	170306_chiba_GST_02.raw
	High	AEFEVHEVYAVDVLISTGEGK	Unambiguous	3	2	NP_001083993.1;NP_001085830.1		CID	1	0	1	1	48.54	0.000253325	0	35.81	1	3	764.718	2292.14	0.469787	101.491	11491	11491	MS2	19/194	170306_chiba_GST_02.raw
	High	HELLQPFNVLYEK	Unambiguous	3	2	NP_001083993.1;NP_001085830.1		CID	1	0	1	1	48.42	0.000225172	0	42.4682	1	3	543.96	1629.87	1.30347	81.623	8710	8710	MS2	16/132	170306_chiba_GST_02.raw
	High	AEFEVHEVYAVDVLISTGEGK	Unambiguous	3	2	NP_001083993.1;NP_001085830.1		CID	1	0	1	1	48.29	0.000291315	0	10.7814	1	3	764.719	2292.14	0.629555	116.134	13458	13458	MS2	17/194	170306_chiba_GST_02.raw
	High	AEFEVHEVYAVDVLISTGEGK	Unambiguous	3	2	NP_001083993.1;NP_001085830.1		CID	1	0	1	1	48.03	0.000284891	0	9.17601	2	3	764.718	2292.14	0.469787	135.259	15937	15937	MS2	16/194	170306_chiba_GST_02.raw
	High	AEFEVHEVYAVDVLISTGEGK	Unambiguous	3	2	NP_001083993.1;NP_001085830.1		CID	1	0	1	1	47.79	0.000326861	0	12.8243	50	3	764.718	2292.14	0.549671	144.935	17137	17137	MS2	16/194	170306_chiba_GST_02.raw
	High	AEFEVHEVYAVDVLISTGEGK	Unambiguous	3	2	NP_001083993.1;NP_001085830.1		CID	1	0	1	1	47.29	0.000340614	0	11.7264	2	3	764.718	2292.14	0.150251	129.923	15264	15264	MS2	16/194	170306_chiba_GST_02.raw
	High	IDLGVHVDGFIANVAHSFVVGASK	Unambiguous	3	2	NP_001083993.1;NP_001085830.1		CID	1	0	1	1	47.19	0.000216768	0	51.2509	6	3	818.105	2452.3	0.345889	108.98	12508	12508	MS2	26/248	170306_chiba_GST_02.raw
	High	AEFEVHEVYAVDVLISTGEGK	Unambiguous	3	2	NP_001083993.1;NP_001085830.1		CID	1	0	1	1	46.84	0.000400572	0	9.87467	1	3	764.719	2292.14	0.789323	121.255	14132	14132	MS2	13/194	170306_chiba_GST_02.raw
	High	FDAMPFTLR	Unambiguous	3	2	NP_001083993.1;NP_001085830.1		CID	1	0	1	1	46.38	0.000323353	0	8.25382	0	2	549.276	1097.55	0.627332	82.391	8823	8823	MS2	8/74	170306_chiba_GST_02.raw
	High	AEFEVHEVYAVDVLISTGEGK	Unambiguous	3	2	NP_001083993.1;NP_001085830.1		CID	1	0	1	1	45.98	0.000495864	0	14.3261	2	3	764.718	2292.14	0.549671	102.301	11601	11601	MS2	13/194	170306_chiba_GST_02.raw
	High	AEFEVHEVYAVDVLISTGEGK	Unambiguous	3	2	NP_001083993.1;NP_001085830.1		CID	1	0	1	1	45.93	0.000493948	0	0	37	3	764.719	2292.14	0.949091	145.156	17157	17157	MS2	14/194	170306_chiba_GST_02.raw
	High	AEFEVHEVYAVDVLISTGEGK	Unambiguous	3	2	NP_001083993.1;NP_001085830.1		CID	1	0	1	1	45.86	0.000498082	0	17.5028	15	3	764.718	2292.14	-0.329054	145.4	17182	17182	MS2	10/194	170306_chiba_GST_02.raw
	High	AEFEVHEVYAVDVLISTGEGK	Unambiguous	3	2	NP_001083993.1;NP_001085830.1		CID	1	0	1	1	45.84	0.000493866	0	7.07369	6	3	764.719	2292.14	0.709439	144.429	17085	17085	MS2	17/194	170306_chiba_GST_02.raw
	High	AEFEVHEVYAVDVLISTGEGK	Unambiguous	3	2	NP_001083993.1;NP_001085830.1		CID	1	0	1	1	45.66	0.00049575	0	13.6414	1	3	764.718	2292.14	0.150251	108.914	12499	12499	MS2	13/194	170306_chiba_GST_02.raw
	High	AEFEVHEVYAVDVLISTGEGK	Unambiguous	3	2	NP_001083993.1;NP_001085830.1		CID	1	0	1	1	45.47	0.000557651	0	23.4709	1	3	764.718	2292.14	0.549671	101.949	11553	11553	MS2	19/194	170306_chiba_GST_02.raw
	High	AEFEVHEVYAVDVLISTGEGK	Unambiguous	3	2	NP_001083993.1;NP_001085830.1		CID	1	0	1	1	45.34	0.000574596	0	14.2575	1	3	764.718	2292.14	0.549671	101.825	11536	11536	MS2	13/194	170306_chiba_GST_02.raw
	High	AEFEVHEVYAVDVLISTGEGK	Unambiguous	3	2	NP_001083993.1;NP_001085830.1		CID	1	0	1	1	45.19	0.000594788	0	12.015	3	3	764.718	2292.14	0.549671	139.447	16461	16461	MS2	20/194	170306_chiba_GST_02.raw
	High	AEFEVHEVYAVDVLISTGEGK	Unambiguous	3	2	NP_001083993.1;NP_001085830.1		CID	1	0	1	1	45.1	0.000559343	0	24.1107	2	3	764.718	2292.14	0.469787	118.058	13710	13710	MS2	16/194	170306_chiba_GST_02.raw
	High	AEFEVHEVYAVDVLISTGEGK	Unambiguous	3	2	NP_001083993.1;NP_001085830.1		CID	1	0	1	1	45.04	0.000615691	0	0	1	3	764.718	2292.14	0.549671	118.865	13816	13816	MS2	9/194	170306_chiba_GST_02.raw
	High	AEFEVHEVYAVDVLISTGEGK	Unambiguous	3	2	NP_001083993.1;NP_001085830.1		CID	1	0	1	1	44.81	0.000617791	0	31.6148	1	3	764.718	2292.14	-0.169286	100.493	11354	11354	MS2	13/194	170306_chiba_GST_02.raw
	High	AEFEVHEVYAVDVLISTGEGK	Unambiguous	3	2	NP_001083993.1;NP_001085830.1		CID	1	0	1	1	44.26	0.000719948	0	10.3255	2	3	764.718	2292.14	0.0703665	100.125	11304	11304	MS2	9/194	170306_chiba_GST_02.raw
	High	AEFEVHEVYAVDVLISTGEGK	Unambiguous	3	2	NP_001083993.1;NP_001085830.1		CID	1	0	1	1	44.19	0.000737362	0	46.5485	54	3	764.719	2292.14	0.789323	151.714	17758	17758	MS2	21/194	170306_chiba_GST_02.raw
	High	AEFEVHEVYAVDVLISTGEGK	Unambiguous	3	2	NP_001083993.1;NP_001085830.1		CID	1	0	1	1	43.88	0.000748947	0	4.72018	1	3	764.718	2292.14	0.230135	120.478	14030	14030	MS2	13/194	170306_chiba_GST_02.raw
	High	AEFEVHEVYAVDVLISTGEGK	Unambiguous	3	2	NP_001083993.1;NP_001085830.1		CID	1	0	1	1	43.6	0.000844658	0	2.89447	34	3	764.719	2292.14	0.789323	148.98	17522	17522	MS2	13/194	170306_chiba_GST_02.raw
	High	AEFEVHEVYAVDVLISTGEGK	Unambiguous	3	2	NP_001083993.1;NP_001085830.1		CID	1	0	1	1	43.52	0.000807006	0	22.1438	1	3	764.72	2292.15	2.46688	111.884	12895	12895	MS2	19/194	170306_chiba_GST_02.raw
	High	AEFEVHEVYAVDVLISTGEGK	Unambiguous	3	2	NP_001083993.1;NP_001085830.1		CID	1	0	1	1	43.38	0.000757677	0	19.0632	24	3	764.717	2292.14	-1.1279	145.7	17215	17215	MS2	9/194	170306_chiba_GST_02.raw
	High	AEFEVHEVYAVDVLISTGEGK	Unambiguous	3	2	NP_001083993.1;NP_001085830.1		CID	1	0	1	1	42.53	0.00107226	0	7.72454	2	3	764.718	2292.14	-0.0894017	131.589	15474	15474	MS2	10/194	170306_chiba_GST_02.raw
	High	AEFEVHEVYAVDVLISTGEGK	Unambiguous	3	2	NP_001083993.1;NP_001085830.1		CID	1	0	1	1	42.31	0.000969357	0	29.6249	62	3	764.717	2292.14	-1.1279	146.991	17341	17341	MS2	18/194	170306_chiba_GST_02.raw
	High	AEFEVHEVYAVDVLISTGEGK	Unambiguous	3	2	NP_001083993.1;NP_001085830.1		CID	1	0	1	1	42.01	0.00114885	0	33.1995	2	3	764.718	2292.14	0.150251	124.605	14572	14572	MS2	25/194	170306_chiba_GST_02.raw
	High	FTVLLMPNGPMR	Unambiguous	3	2	NP_001083993.1;NP_001085830.1		CID	1	0	1	1	41.95	0.000989308	0	55.4899	1	2	688.365	1375.72	-0.428774	88.1949	9647	9647	MS2	6/96	170306_chiba_GST_02.raw
	High	AEFEVHEVYAVDVLISTGEGK	Unambiguous	3	2	NP_001083993.1;NP_001085830.1		CID	1	0	1	1	41.44	0.00141047	0	21.0148	1	3	764.719	2292.14	0.629555	105.538	12039	12039	MS2	12/194	170306_chiba_GST_02.raw
	High	FDAMPFTLR	Unambiguous	3	2	NP_001083993.1;NP_001085830.1		CID	1	0	1	1	40.56	0.00119547	0	8.39593	0	2	549.276	1097.55	0.516111	84.2656	9090	9090	MS2	6/74	170306_chiba_GST_02.raw
	High	AEFEVHEVYAVDVLISTGEGK	Unambiguous	3	2	NP_001083993.1;NP_001085830.1		CID	1	0	1	1	40.52	0.00171221	0	36.7878	2	3	764.718	2292.14	-0.24917	106.215	12131	12131	MS2	19/194	170306_chiba_GST_02.raw
	High	EGEFVAQFK	Unambiguous	1	1	NP_001085830.1		CID	1	0	1	1	40.45	0.00104131	0	46.9995	0	2	527.764	1054.52	0.223971	60.0615	5456	5456	MS2	6/72	170306_chiba_GST_02.raw
	High	AEFEVHEVYAVDVLISTGEGK	Unambiguous	3	2	NP_001083993.1;NP_001085830.1		CID	1	0	1	1	40.43	0.00163938	0	14.176	2	3	764.718	2292.14	0.469787	128.633	15096	15096	MS2	14/194	170306_chiba_GST_02.raw
	High	AEFEVHEVYAVDVLISTGEGK	Unambiguous	3	2	NP_001083993.1;NP_001085830.1		CID	1	0	1	1	40.42	0.00169762	0	40.617	2	3	764.718	2292.14	-0.169286	96.4707	10802	10802	MS2	15/194	170306_chiba_GST_02.raw
	High	AEFEVHEVYAVDVLISTGEGK	Unambiguous	3	2	NP_001083993.1;NP_001085830.1		CID	1	0	1	1	39.96	0.00198318	0	25.2546	1	3	764.718	2292.14	0.549671	104.598	11909	11909	MS2	7/194	170306_chiba_GST_02.raw
	High	AEFEVHEVYAVDVLISTGEGK	Unambiguous	3	2	NP_001083993.1;NP_001085830.1		CID	1	0	1	1	39.87	0.00170529	0	32.6356	2	3	764.719	2292.14	1.82781	111.482	12842	12842	MS2	9/194	170306_chiba_GST_02.raw
	High	AEFEVHEVYAVDVLISTGEGK	Unambiguous	3	2	NP_001083993.1;NP_001085830.1		CID	1	0	1	1	39.66	0.00197902	0	35.2601	2	3	764.718	2292.14	0.310019	105.885	12086	12086	MS2	13/194	170306_chiba_GST_02.raw
	High	IDLGVHVDGFIANVAHSFVVGASK	Unambiguous	3	2	NP_001083993.1;NP_001085830.1		CID	1	0	1	1	39.17	0.00140429	0	36.807	1	3	818.105	2452.3	0.569889	108.749	12477	12477	MS2	29/248	170306_chiba_GST_02.raw
	High	AEFEVHEVYAVDVLISTGEGK	Unambiguous	3	2	NP_001083993.1;NP_001085830.1		CID	1	0	1	1	38.98	0.00230814	0	15.877	1	3	764.718	2292.14	0.150251	115.851	13421	13421	MS2	12/194	170306_chiba_GST_02.raw
	High	AEFEVHEVYAVDVLISTGEGK	Unambiguous	3	2	NP_001083993.1;NP_001085830.1		CID	1	0	1	1	37.36	0.00332413	0	22.3954	2	3	764.718	2292.14	0.469787	113.648	13129	13129	MS2	15/194	170306_chiba_GST_02.raw
	High	AEFEVHEVYAVDVLISTGEGK	Unambiguous	3	2	NP_001083993.1;NP_001085830.1		CID	1	0	1	1	37.23	0.00371846	0	28.9276	2	3	764.718	2292.14	0.549671	96.6738	10830	10830	MS2	18/194	170306_chiba_GST_02.raw
	High	AEFEVHEVYAVDVLISTGEGK	Unambiguous	3	2	NP_001083993.1;NP_001085830.1		CID	1	0	1	1	36.43	0.00440231	0	11.5344	4	3	764.719	2292.14	0.869207	143.596	16986	16986	MS2	12/194	170306_chiba_GST_02.raw
	High	AEFEVHEVYAVDVLISTGEGK	Unambiguous	3	2	NP_001083993.1;NP_001085830.1		CID	1	0	1	1	36.29	0.00454654	0	25.6065	1	3	764.719	2292.14	0.789323	105.717	12063	12063	MS2	15/194	170306_chiba_GST_02.raw
	High	AEFEVHEVYAVDVLISTGEGK	Unambiguous	3	2	NP_001083993.1;NP_001085830.1		CID	1	0	1	1	35.15	0.00559051	0	36.8865	1	3	764.718	2292.14	0.230135	113.462	13105	13105	MS2	15/194	170306_chiba_GST_02.raw
	High	AEFEVHEVYAVDVLISTGEGK	Unambiguous	3	2	NP_001083993.1;NP_001085830.1		CID	1	0	1	1	34.59	0.00682909	0	24.3661	2	3	764.719	2292.14	0.629555	94.8692	10575	10575	MS2	14/194	170306_chiba_GST_02.raw
	High	AEFEVHEVYAVDVLISTGEGK	Unambiguous	3	2	NP_001083993.1;NP_001085830.1		CID	1	0	1	1	34.09	0.00715544	0	30.0028	2	3	764.719	2292.14	1.26863	101.232	11456	11456	MS2	19/194	170306_chiba_GST_02.raw
	High	AEFEVHEVYAVDVLISTGEGK	Unambiguous	3	2	NP_001083993.1;NP_001085830.1		CID	1	0	1	1	33.89	0.00739058	0	30.0726	2	3	764.718	2292.14	0.469787	111.128	12796	12796	MS2	23/194	170306_chiba_GST_02.raw
	High	AEFEVHEVYAVDVLISTGEGK	Unambiguous	3	2	NP_001083993.1;NP_001085830.1		CID	1	0	1	1	33.85	0.00754138	0	0	62	3	764.718	2292.14	0.310019	149.516	17565	17565	MS2	14/194	170306_chiba_GST_02.raw
	High	AEFEVHEVYAVDVLISTGEGK	Unambiguous	3	2	NP_001083993.1;NP_001085830.1		CID	1	0	1	1	33.41	0.00834548	0	12.9415	38	3	764.718	2292.14	0.310019	147.698	17413	17413	MS2	14/194	170306_chiba_GST_02.raw
	High	AEFEVHEVYAVDVLISTGEGK	Unambiguous	3	2	NP_001083993.1;NP_001085830.1		CID	1	0	1	1	33.16	0.00881582	0	28.2777	77	3	764.718	2292.14	0.150251	150.389	17639	17639	MS2	16/194	170306_chiba_GST_02.raw
	High	IDLGVHVDGFIANVAHSFVVGASK	Unambiguous	3	2	NP_001083993.1;NP_001085830.1		CID	1	0	1	1	33.14	0.0057264	0	49.0485	7	3	818.104	2452.3	-0.475447	109.078	12521	12521	MS2	22/248	170306_chiba_GST_02.raw
	High	AEFEVHEVYAVDVLISTGEGK	Unambiguous	3	2	NP_001083993.1;NP_001085830.1		CID	1	0	1	1	32.73	0.01024	0	40.1322	1	3	764.718	2292.14	-0.0894017	97.5625	10953	10953	MS2	18/194	170306_chiba_GST_02.raw
	High	AEFEVHEVYAVDVLISTGEGK	Unambiguous	3	2	NP_001083993.1;NP_001085830.1		CID	1	0	1	1	31.85	0.0121482	0	23.2352	4	3	764.717	2292.14	-0.728475	142.817	16888	16888	MS2	19/194	170306_chiba_GST_02.raw
	High	AEFEVHEVYAVDVLISTGEGK	Unambiguous	3	2	NP_001083993.1;NP_001085830.1		CID	1	0	1	1	31.73	0.0128914	0	35.2848	1	3	764.718	2292.14	0.0703665	96.0035	10736	10736	MS2	15/194	170306_chiba_GST_02.raw
	High	AAHLCGEAALR	Unambiguous	1	1	NP_001085830.1		CID	1	0	1	1	31.38	0.00549474	0	33.241	0	2	556.288	1111.57	0.480046	45.9023	3198	3198	MS2	8/80	170306_chiba_GST_02.raw
	High	LVKPGNQNTQVTEAWNK	Unambiguous	1	1	NP_001085830.1		CID	1	0	1	1	31.23	0.011225	0	1.94352	0	3	643.006	1927	0.532076	47.6393	3482	3482	MS2	15/164	170306_chiba_GST_02.raw
	High	AEFEVHEVYAVDVLISTGEGK	Unambiguous	3	2	NP_001083993.1;NP_001085830.1		CID	1	0	1	1	31.23	0.0144644	0	25.1639	36	3	764.718	2292.14	-0.0894017	151.8	17766	17766	MS2	9/194	170306_chiba_GST_02.raw
	High	AEFEVHEVYAVDVLISTGEGK	Unambiguous	3	2	NP_001083993.1;NP_001085830.1		CID	1	0	1	1	30.93	0.014732	0	82.0681	2	3	764.718	2292.14	0.150251	96.3635	10787	10787	MS2	12/194	170306_chiba_GST_02.raw
	High	AEFEVHEVYAVDVLISTGEGK	Unambiguous	3	2	NP_001083993.1;NP_001085830.1		CID	1	0	1	1	30.77	0.0152849	0	23.0068	1	3	764.718	2292.14	0.150251	96.9652	10870	10870	MS2	14/194	170306_chiba_GST_02.raw
	High	LVKPGNQNTQVTEAWNK	Unambiguous	1	1	NP_001085830.1		CID	1	0	1	1	30.67	0.0128984	0	18.7095	1	3	643.006	1927	-0.22809	48.4896	3622	3622	MS2	12/164	170306_chiba_GST_02.raw
	High	QHVIDGEK	Unambiguous	3	2	NP_001083993.1;NP_001085830.1		CID	1	0	1	1	29.55	0.0121455	0	11.3099	0	2	463.241	925.474	0.122372	41.8595	2520	2520	MS2	4/74	170306_chiba_GST_02.raw
	High	AEFEVHEVYAVDVLISTGEGK	Unambiguous	3	2	NP_001083993.1;NP_001085830.1		CID	1	0	1	1	29.11	0.0237509	0	73.3068	1	3	764.719	2292.14	0.949091	93.1051	10332	10332	MS2	10/194	170306_chiba_GST_02.raw
	High	AEFEVHEVYAVDVLISTGEGK	Unambiguous	3	2	NP_001083993.1;NP_001085830.1		CID	1	0	1	1	28.63	0.0265266	0	20.3434	2	3	764.719	2292.14	0.949091	100.606	11369	11369	MS2	15/194	170306_chiba_GST_02.raw
NP_001083993.1	proliferation-associated 2G4, 38kD [Xenopus laevis]	4267.19	53.85	2	2	17	116	390	43.4581	6.99072
	Confidence Level	Sequence	PSM Ambiguity	# Proteins	# Protein Groups	Protein Group Accessions	Modifications	Activation Type	ΔScore	ΔCn	Rank	Search Engine Rank	IonScore	Exp Value	# Missed Cleavages	Isolation Interference [%]	Ion Inject Time [ms]	Charge	m/z [Da]	MH+ [Da]	ΔM [ppm]	RT [min]	First Scan	Last Scan	MS Order	Ions Matched	Spectrum File
	High	ALVDTATAGASLLNLCEK	Unambiguous	2	1	NP_001083993.1		CID	1	0	1	1	139.65	1.53376e-13	0	5.74479	0	2	895.472	1789.94	0.368777	92.0414	10184	10184	MS2	14/170	170306_chiba_GST_02.raw
	High	AEFEVHEVYAVDVLISTGEGK	Unambiguous	3	2	NP_001083993.1;NP_001085830.1		CID	1	0	1	1	125.9	4.80664e-12	0	49.1769	13	2	1146.57	2292.14	-0.456328	114.047	13182	13182	MS2	26/194	170306_chiba_GST_02.raw
	High	AEFEVHEVYAVDVLISTGEGK	Unambiguous	3	2	NP_001083993.1;NP_001085830.1		CID	1	0	1	1	108.63	2.68007e-10	0	37.4681	31	2	1146.57	2292.14	1.14135	144.014	17037	17037	MS2	24/194	170306_chiba_GST_02.raw
	High	IDLGVHVDGFIANVAHSFVVGASK	Unambiguous	3	2	NP_001083993.1;NP_001085830.1		CID	1	0	1	1	97.19	2.17723e-09	0	19.2118	2	2	1226.65	2452.3	0.87404	107.591	12320	12320	MS2	15/248	170306_chiba_GST_02.raw
	High	HELLQPFNVLYEK	Unambiguous	3	2	NP_001083993.1;NP_001085830.1		CID	1	0	1	1	87.57	2.85225e-08	0	22.4228	1	2	815.436	1629.86	0.749996	81.5959	8706	8706	MS2	22/132	170306_chiba_GST_02.raw
	High	IDLGVHVDGFIANVAHSFVVGASK	Unambiguous	3	2	NP_001083993.1;NP_001085830.1		CID	1	0	1	1	84.97	3.64591e-08	0	9.21189	1	2	1226.65	2452.3	0.973595	107.389	12292	12292	MS2	15/248	170306_chiba_GST_02.raw
	High	ITSGPFEPDLYK	Unambiguous	3	2	NP_001083993.1;NP_001085830.1		CID	1	0	1	1	79	2.07093e-07	0	10.5	0	2	683.848	1366.69	0.305375	72.3837	7350	7350	MS2	9/102	170306_chiba_GST_02.raw
	High	GDAMIMEETGK	Unambiguous	3	2	NP_001083993.1;NP_001085830.1		CID	1	0	1	1	78.28	4.82929e-08	0	6.8451	0	2	591.262	1181.52	-0.226528	49.9566	3859	3859	MS2	9/94	170306_chiba_GST_02.raw
	High	ALVDTATAGASLLNLCEK	Unambiguous	2	1	NP_001083993.1		CID	1	0	1	1	74.84	4.70817e-07	0	11.5588	0	3	597.317	1789.94	0.599958	92.0559	10186	10186	MS2	22/170	170306_chiba_GST_02.raw
	High	SELEVQDSELK	Unambiguous	3	2	NP_001083993.1;NP_001085830.1		CID	1	0	1	1	74.43	3.51564e-07	0	8.32551	0	2	638.817	1276.63	-0.0036948	50.5937	3964	3964	MS2	9/106	170306_chiba_GST_02.raw
	High	HELLQPFNVLYEK	Unambiguous	3	2	NP_001083993.1;NP_001085830.1		CID	1	0	1	1	70.94	9.18131e-07	0	25.7516	1	2	815.436	1629.86	0.525308	82.4293	8829	8829	MS2	9/132	170306_chiba_GST_02.raw
	High	IDLGVHVDGFIANVAHSFVVGASK	Unambiguous	3	2	NP_001083993.1;NP_001085830.1		CID	1	0	1	1	69.77	1.22309e-06	0	3.80558	0	3	818.105	2452.3	0.569889	107.171	12262	12262	MS2	14/248	170306_chiba_GST_02.raw
	High	AEFEVHEVYAVDVLISTGEGK	Unambiguous	3	2	NP_001083993.1;NP_001085830.1		CID	1	0	1	1	67.2	3.44888e-06	0	8.44219	3	3	764.718	2292.14	0.469787	136.061	16041	16041	MS2	15/194	170306_chiba_GST_02.raw
	High	ITSGPFEPDLYKSELEVQDSELK	Unambiguous	3	2	NP_001083993.1;NP_001085830.1		CID	1	0	1	1	66.81	3.13716e-06	1	35.6587	1	3	875.437	2624.3	-0.0448331	80.7113	8577	8577	MS2	18/236	170306_chiba_GST_02.raw
	High	TIIQNPTDQQK	Unambiguous	3	2	NP_001083993.1;NP_001085830.1		CID	1	0	1	1	66.39	2.76686e-06	0	3.4635	0	2	643.342	1285.68	1.44669	46.0316	3220	3220	MS2	9/108	170306_chiba_GST_02.raw
	High	FTVLLMPNGPMR	Unambiguous	3	2	NP_001083993.1;NP_001085830.1		CID	1	0	1	1	65.84	4.03954e-06	0	29.1275	1	2	688.365	1375.72	-0.340042	87.1335	9496	9496	MS2	10/96	170306_chiba_GST_02.raw
	High	AEFEVHEVYAVDVLISTGEGK	Unambiguous	3	2	NP_001083993.1;NP_001085830.1		CID	1	0	1	1	65.4	5.66712e-06	0	8.14572	1	3	764.718	2292.14	0.549671	127.837	14994	14994	MS2	15/194	170306_chiba_GST_02.raw
	High	MGGDIANR	Unambiguous	3	2	NP_001083993.1;NP_001085830.1		CID	1	0	1	1	64.04	2.09062e-06	0	16.9535	0	2	417.201	833.394	0.303646	43.7093	2832	2832	MS2	7/58	170306_chiba_GST_02.raw
	High	AEFEVHEVYAVDVLISTGEGK	Unambiguous	3	2	NP_001083993.1;NP_001085830.1		CID	1	0	1	1	63.72	8.34377e-06	0	8.2247	2	3	764.719	2292.14	0.629555	127.022	14888	14888	MS2	15/194	170306_chiba_GST_02.raw
	High	AEFEVHEVYAVDVLISTGEGK	Unambiguous	3	2	NP_001083993.1;NP_001085830.1		CID	1	0	1	1	63.1	9.47722e-06	0	31.1596	2	3	764.719	2292.14	0.869207	129.135	15161	15161	MS2	18/194	170306_chiba_GST_02.raw
	High	LVKPGNQNSQVTEAWNK	Unambiguous	2	1	NP_001083993.1		CID	1	0	1	1	62.62	9.70953e-06	0	2.90195	0	2	956.998	1912.99	0.747506	47.3223	3431	3431	MS2	8/164	170306_chiba_GST_02.raw
	High	AEFEVHEVYAVDVLISTGEGK	Unambiguous	3	2	NP_001083993.1;NP_001085830.1		CID	1	0	1	1	62.5	1.01784e-05	0	7.47645	2	3	764.718	2292.14	0.469787	134.085	15789	15789	MS2	18/194	170306_chiba_GST_02.raw
	High	AEFEVHEVYAVDVLISTGEGK	Unambiguous	3	2	NP_001083993.1;NP_001085830.1		CID	1	0	1	1	61.58	1.36572e-05	0	11.9601	2	3	764.718	2292.14	0.549671	141.96	16776	16776	MS2	20/194	170306_chiba_GST_02.raw
	High	ITSGPFEPDLYK	Unambiguous	3	2	NP_001083993.1;NP_001085830.1		CID	1	0	1	1	61.37	1.19996e-05	0	13.5001	0	2	683.848	1366.69	0.305375	71.5387	7221	7221	MS2	8/102	170306_chiba_GST_02.raw
	High	AEFEVHEVYAVDVLISTGEGK	Unambiguous	3	2	NP_001083993.1;NP_001085830.1		CID	1	0	1	1	61.01	1.43443e-05	0	8.90927	2	3	764.718	2292.14	0.469787	132.433	15580	15580	MS2	15/194	170306_chiba_GST_02.raw
	High	IDLGVHVDGFIANVAHSFVVGASK	Unambiguous	3	2	NP_001083993.1;NP_001085830.1		CID	1	0	1	1	60.36	1.07232e-05	0	13.8723	0	3	818.104	2452.3	-0.102112	107.932	12367	12367	MS2	16/248	170306_chiba_GST_02.raw
	High	SDQDYLLK	Unambiguous	3	2	NP_001083993.1;NP_001085830.1		CID	1	0	1	1	60.06	2.8109e-05	0	14.9415	0	2	491.248	981.489	0.347437	52.4276	4258	4258	MS2	11/72	170306_chiba_GST_02.raw
	High	SGDEEQQEQTIAEDLVVTK	Unambiguous	2	2	NP_001085830.1;NP_001083993.1		CID	1	0	1	1	59.12	1.21849e-05	0	14.5061	1	2	1060.01	2119.01	1.1042	76.1454	7909	7909	MS2	13/204	170306_chiba_GST_02.raw
	High	AEFEVHEVYAVDVLISTGEGK	Unambiguous	3	2	NP_001083993.1;NP_001085830.1		CID	1	0	1	1	57.33	3.37492e-05	0	6.63998	2	3	764.718	2292.14	0.150251	130.745	15369	15369	MS2	21/194	170306_chiba_GST_02.raw
	High	AEFEVHEVYAVDVLISTGEGK	Unambiguous	3	2	NP_001083993.1;NP_001085830.1		CID	1	0	1	1	57.17	3.47279e-05	0	19.1802	2	3	764.718	2292.14	0.469787	114.583	13253	13253	MS2	10/194	170306_chiba_GST_02.raw
	High	AEFEVHEVYAVDVLISTGEGK	Unambiguous	3	2	NP_001083993.1;NP_001085830.1		CID	1	0	1	1	56.94	3.91454e-05	0	13.2637	34	3	764.718	2292.14	-0.00951758	148.15	17453	17453	MS2	14/194	170306_chiba_GST_02.raw
	High	AEFEVHEVYAVDVLISTGEGK	Unambiguous	3	2	NP_001083993.1;NP_001085830.1		CID	1	0	1	1	56.89	3.92917e-05	0	9.03605	2	3	764.718	2292.14	0.0703665	133.249	15684	15684	MS2	19/194	170306_chiba_GST_02.raw
	High	AEFEVHEVYAVDVLISTGEGK	Unambiguous	3	2	NP_001083993.1;NP_001085830.1		CID	1	0	1	1	55.99	4.72064e-05	0	20.3056	1	3	764.718	2292.14	-0.408938	98.3368	11060	11060	MS2	7/194	170306_chiba_GST_02.raw
	High	AFFSEVER	Unambiguous	3	2	NP_001083993.1;NP_001085830.1		CID	1	0	1	1	55.78	3.42192e-05	0	27.0019	1	2	492.743	984.479	0.549773	61.226	5637	5637	MS2	7/62	170306_chiba_GST_02.raw
	High	AFFSEVER	Unambiguous	3	2	NP_001083993.1;NP_001085830.1		CID	1	0	1	1	55.43	1.56098e-05	0	2.51674	0	2	492.743	984.478	-0.752173	61.9974	5758	5758	MS2	7/62	170306_chiba_GST_02.raw
	High	AEFEVHEVYAVDVLISTGEGK	Unambiguous	3	2	NP_001083993.1;NP_001085830.1		CID	1	0	1	1	54.41	6.5566e-05	0	18.0642	2	3	764.718	2292.14	0.469787	141.147	16674	16674	MS2	19/194	170306_chiba_GST_02.raw
	High	AEFEVHEVYAVDVLISTGEGK	Unambiguous	3	2	NP_001083993.1;NP_001085830.1		CID	1	0	1	1	53.87	8.06051e-05	0	20.2188	1	3	764.719	2292.14	0.629555	108.113	12392	12392	MS2	13/194	170306_chiba_GST_02.raw
	High	AEFEVHEVYAVDVLISTGEGK	Unambiguous	3	2	NP_001083993.1;NP_001085830.1		CID	1	0	1	1	52.84	9.51593e-05	0	5.26969	3	3	764.718	2292.14	0.310019	136.917	16146	16146	MS2	19/194	170306_chiba_GST_02.raw
	High	AEFEVHEVYAVDVLISTGEGK	Unambiguous	3	2	NP_001083993.1;NP_001085830.1		CID	1	0	1	1	52.16	0.000117674	0	16.8096	1	3	764.719	2292.14	0.869207	115.03	13313	13313	MS2	17/194	170306_chiba_GST_02.raw
	High	AEFEVHEVYAVDVLISTGEGK	Unambiguous	3	2	NP_001083993.1;NP_001085830.1		CID	1	0	1	1	51.92	0.000120504	0	14.0312	2	3	764.718	2292.14	-0.648591	112.656	12999	12999	MS2	12/194	170306_chiba_GST_02.raw
	High	AEFEVHEVYAVDVLISTGEGK	Unambiguous	3	2	NP_001083993.1;NP_001085830.1		CID	1	0	1	1	51.84	0.000119798	0	12.2806	1	3	764.718	2292.14	0.389903	98.7775	11120	11120	MS2	14/194	170306_chiba_GST_02.raw
	High	AEFEVHEVYAVDVLISTGEGK	Unambiguous	3	2	NP_001083993.1;NP_001085830.1		CID	1	0	1	1	50.95	0.000146644	0	9.66193	3	3	764.718	2292.14	0.150251	140.292	16567	16567	MS2	13/194	170306_chiba_GST_02.raw
	High	AEFEVHEVYAVDVLISTGEGK	Unambiguous	3	2	NP_001083993.1;NP_001085830.1		CID	1	0	1	1	50.68	0.000156905	0	9.49305	14	3	764.719	2292.14	1.26863	146.148	17259	17259	MS2	12/194	170306_chiba_GST_02.raw
	High	AEFEVHEVYAVDVLISTGEGK	Unambiguous	3	2	NP_001083993.1;NP_001085830.1		CID	1	0	1	1	50.35	0.000177134	0	10.4488	3	3	764.718	2292.14	0.0703665	138.628	16358	16358	MS2	23/194	170306_chiba_GST_02.raw
	High	AEFEVHEVYAVDVLISTGEGK	Unambiguous	3	2	NP_001083993.1;NP_001085830.1		CID	1	0	1	1	50.26	0.000171895	0	10.4414	1	3	764.718	2292.14	0.150251	106.606	12185	12185	MS2	13/194	170306_chiba_GST_02.raw
	High	AEFEVHEVYAVDVLISTGEGK	Unambiguous	3	2	NP_001083993.1;NP_001085830.1		CID	1	0	1	1	49.77	0.000199806	0	14.1089	1	3	764.719	2292.14	0.709439	117.256	13606	13606	MS2	11/194	170306_chiba_GST_02.raw
	High	AEFEVHEVYAVDVLISTGEGK	Unambiguous	3	2	NP_001083993.1;NP_001085830.1		CID	1	0	1	1	49.74	0.000205438	0	27.4533	1	3	764.719	2292.14	1.02897	116.945	13566	13566	MS2	10/194	170306_chiba_GST_02.raw
	High	AEFEVHEVYAVDVLISTGEGK	Unambiguous	3	2	NP_001083993.1;NP_001085830.1		CID	1	0	1	1	49.69	0.00019654	0	42.0355	2	3	764.718	2292.14	0.230135	103.215	11724	11724	MS2	10/194	170306_chiba_GST_02.raw
	High	AEFEVHEVYAVDVLISTGEGK	Unambiguous	3	2	NP_001083993.1;NP_001085830.1		CID	1	0	1	1	49.41	0.000209629	0	13.1748	1	3	764.718	2292.14	0.310019	107.402	12294	12294	MS2	19/194	170306_chiba_GST_02.raw
	High	AEFEVHEVYAVDVLISTGEGK	Unambiguous	3	2	NP_001083993.1;NP_001085830.1		CID	1	0	1	1	49.12	0.000224105	0	23.5531	2	3	764.718	2292.14	0.310019	125.407	14678	14678	MS2	26/194	170306_chiba_GST_02.raw
	High	AEFEVHEVYAVDVLISTGEGK	Unambiguous	3	2	NP_001083993.1;NP_001085830.1		CID	1	0	1	1	49.08	0.00022556	0	18.3275	3	3	764.718	2292.14	0.150251	137.787	16253	16253	MS2	19/194	170306_chiba_GST_02.raw
	High	AEFEVHEVYAVDVLISTGEGK	Unambiguous	3	2	NP_001083993.1;NP_001085830.1		CID	1	0	1	1	48.89	0.000233711	0	19.0382	1	3	764.718	2292.14	0.469787	123.525	14429	14429	MS2	17/194	170306_chiba_GST_02.raw
	High	AEFEVHEVYAVDVLISTGEGK	Unambiguous	3	2	NP_001083993.1;NP_001085830.1		CID	1	0	1	1	48.85	0.000252163	0	9.87481	2	3	764.719	2292.14	0.789323	126.211	14783	14783	MS2	20/194	170306_chiba_GST_02.raw
	High	AEFEVHEVYAVDVLISTGEGK	Unambiguous	3	2	NP_001083993.1;NP_001085830.1		CID	1	0	1	1	48.54	0.000253325	0	35.81	1	3	764.718	2292.14	0.469787	101.491	11491	11491	MS2	19/194	170306_chiba_GST_02.raw
	High	HELLQPFNVLYEK	Unambiguous	3	2	NP_001083993.1;NP_001085830.1		CID	1	0	1	1	48.42	0.000225172	0	42.4682	1	3	543.96	1629.87	1.30347	81.623	8710	8710	MS2	16/132	170306_chiba_GST_02.raw
	High	AEFEVHEVYAVDVLISTGEGK	Unambiguous	3	2	NP_001083993.1;NP_001085830.1		CID	1	0	1	1	48.29	0.000291315	0	10.7814	1	3	764.719	2292.14	0.629555	116.134	13458	13458	MS2	17/194	170306_chiba_GST_02.raw
	High	AEFEVHEVYAVDVLISTGEGK	Unambiguous	3	2	NP_001083993.1;NP_001085830.1		CID	1	0	1	1	48.03	0.000284891	0	9.17601	2	3	764.718	2292.14	0.469787	135.259	15937	15937	MS2	16/194	170306_chiba_GST_02.raw
	High	AEFEVHEVYAVDVLISTGEGK	Unambiguous	3	2	NP_001083993.1;NP_001085830.1		CID	1	0	1	1	47.79	0.000326861	0	12.8243	50	3	764.718	2292.14	0.549671	144.935	17137	17137	MS2	16/194	170306_chiba_GST_02.raw
	High	AEFEVHEVYAVDVLISTGEGK	Unambiguous	3	2	NP_001083993.1;NP_001085830.1		CID	1	0	1	1	47.29	0.000340614	0	11.7264	2	3	764.718	2292.14	0.150251	129.923	15264	15264	MS2	16/194	170306_chiba_GST_02.raw
	High	IDLGVHVDGFIANVAHSFVVGASK	Unambiguous	3	2	NP_001083993.1;NP_001085830.1		CID	1	0	1	1	47.19	0.000216768	0	51.2509	6	3	818.105	2452.3	0.345889	108.98	12508	12508	MS2	26/248	170306_chiba_GST_02.raw
	High	AEFEVHEVYAVDVLISTGEGK	Unambiguous	3	2	NP_001083993.1;NP_001085830.1		CID	1	0	1	1	46.84	0.000400572	0	9.87467	1	3	764.719	2292.14	0.789323	121.255	14132	14132	MS2	13/194	170306_chiba_GST_02.raw
	High	FDAMPFTLR	Unambiguous	3	2	NP_001083993.1;NP_001085830.1		CID	1	0	1	1	46.38	0.000323353	0	8.25382	0	2	549.276	1097.55	0.627332	82.391	8823	8823	MS2	8/74	170306_chiba_GST_02.raw
	High	AEFEVHEVYAVDVLISTGEGK	Unambiguous	3	2	NP_001083993.1;NP_001085830.1		CID	1	0	1	1	45.98	0.000495864	0	14.3261	2	3	764.718	2292.14	0.549671	102.301	11601	11601	MS2	13/194	170306_chiba_GST_02.raw
	High	AEFEVHEVYAVDVLISTGEGK	Unambiguous	3	2	NP_001083993.1;NP_001085830.1		CID	1	0	1	1	45.93	0.000493948	0	0	37	3	764.719	2292.14	0.949091	145.156	17157	17157	MS2	14/194	170306_chiba_GST_02.raw
	High	AEFEVHEVYAVDVLISTGEGK	Unambiguous	3	2	NP_001083993.1;NP_001085830.1		CID	1	0	1	1	45.86	0.000498082	0	17.5028	15	3	764.718	2292.14	-0.329054	145.4	17182	17182	MS2	10/194	170306_chiba_GST_02.raw
	High	AEFEVHEVYAVDVLISTGEGK	Unambiguous	3	2	NP_001083993.1;NP_001085830.1		CID	1	0	1	1	45.84	0.000493866	0	7.07369	6	3	764.719	2292.14	0.709439	144.429	17085	17085	MS2	17/194	170306_chiba_GST_02.raw
	High	AEFEVHEVYAVDVLISTGEGK	Unambiguous	3	2	NP_001083993.1;NP_001085830.1		CID	1	0	1	1	45.66	0.00049575	0	13.6414	1	3	764.718	2292.14	0.150251	108.914	12499	12499	MS2	13/194	170306_chiba_GST_02.raw
	High	AEFEVHEVYAVDVLISTGEGK	Unambiguous	3	2	NP_001083993.1;NP_001085830.1		CID	1	0	1	1	45.47	0.000557651	0	23.4709	1	3	764.718	2292.14	0.549671	101.949	11553	11553	MS2	19/194	170306_chiba_GST_02.raw
	High	AEFEVHEVYAVDVLISTGEGK	Unambiguous	3	2	NP_001083993.1;NP_001085830.1		CID	1	0	1	1	45.34	0.000574596	0	14.2575	1	3	764.718	2292.14	0.549671	101.825	11536	11536	MS2	13/194	170306_chiba_GST_02.raw
	High	AEFEVHEVYAVDVLISTGEGK	Unambiguous	3	2	NP_001083993.1;NP_001085830.1		CID	1	0	1	1	45.19	0.000594788	0	12.015	3	3	764.718	2292.14	0.549671	139.447	16461	16461	MS2	20/194	170306_chiba_GST_02.raw
	High	AEFEVHEVYAVDVLISTGEGK	Unambiguous	3	2	NP_001083993.1;NP_001085830.1		CID	1	0	1	1	45.1	0.000559343	0	24.1107	2	3	764.718	2292.14	0.469787	118.058	13710	13710	MS2	16/194	170306_chiba_GST_02.raw
	High	AEFEVHEVYAVDVLISTGEGK	Unambiguous	3	2	NP_001083993.1;NP_001085830.1		CID	1	0	1	1	45.04	0.000615691	0	0	1	3	764.718	2292.14	0.549671	118.865	13816	13816	MS2	9/194	170306_chiba_GST_02.raw
	High	AEFEVHEVYAVDVLISTGEGK	Unambiguous	3	2	NP_001083993.1;NP_001085830.1		CID	1	0	1	1	44.81	0.000617791	0	31.6148	1	3	764.718	2292.14	-0.169286	100.493	11354	11354	MS2	13/194	170306_chiba_GST_02.raw
	High	LVKPGNQNSQVTEAWNK	Unambiguous	2	1	NP_001083993.1		CID	1	0	1	1	44.66	0.000600174	0	1.35145	0	3	638.334	1912.99	0.261892	47.2459	3419	3419	MS2	9/164	170306_chiba_GST_02.raw
	High	ALVDTATAGASLLNLCEK	Unambiguous	2	1	NP_001083993.1		CID	1	0	1	1	44.34	0.000463843	0	10.2406	0	3	597.317	1789.94	-0.116122	92.5081	10250	10250	MS2	19/170	170306_chiba_GST_02.raw
	High	AEFEVHEVYAVDVLISTGEGK	Unambiguous	3	2	NP_001083993.1;NP_001085830.1		CID	1	0	1	1	44.26	0.000719948	0	10.3255	2	3	764.718	2292.14	0.0703665	100.125	11304	11304	MS2	9/194	170306_chiba_GST_02.raw
	High	AEFEVHEVYAVDVLISTGEGK	Unambiguous	3	2	NP_001083993.1;NP_001085830.1		CID	1	0	1	1	44.19	0.000737362	0	46.5485	54	3	764.719	2292.14	0.789323	151.714	17758	17758	MS2	21/194	170306_chiba_GST_02.raw
	High	AEFEVHEVYAVDVLISTGEGK	Unambiguous	3	2	NP_001083993.1;NP_001085830.1		CID	1	0	1	1	43.88	0.000748947	0	4.72018	1	3	764.718	2292.14	0.230135	120.478	14030	14030	MS2	13/194	170306_chiba_GST_02.raw
	High	AEFEVHEVYAVDVLISTGEGK	Unambiguous	3	2	NP_001083993.1;NP_001085830.1		CID	1	0	1	1	43.6	0.000844658	0	2.89447	34	3	764.719	2292.14	0.789323	148.98	17522	17522	MS2	13/194	170306_chiba_GST_02.raw
	High	AEFEVHEVYAVDVLISTGEGK	Unambiguous	3	2	NP_001083993.1;NP_001085830.1		CID	1	0	1	1	43.52	0.000807006	0	22.1438	1	3	764.72	2292.15	2.46688	111.884	12895	12895	MS2	19/194	170306_chiba_GST_02.raw
	High	AEFEVHEVYAVDVLISTGEGK	Unambiguous	3	2	NP_001083993.1;NP_001085830.1		CID	1	0	1	1	43.38	0.000757677	0	19.0632	24	3	764.717	2292.14	-1.1279	145.7	17215	17215	MS2	9/194	170306_chiba_GST_02.raw
	High	AEFEVHEVYAVDVLISTGEGK	Unambiguous	3	2	NP_001083993.1;NP_001085830.1		CID	1	0	1	1	42.53	0.00107226	0	7.72454	2	3	764.718	2292.14	-0.0894017	131.589	15474	15474	MS2	10/194	170306_chiba_GST_02.raw
	High	AEFEVHEVYAVDVLISTGEGK	Unambiguous	3	2	NP_001083993.1;NP_001085830.1		CID	1	0	1	1	42.31	0.000969357	0	29.6249	62	3	764.717	2292.14	-1.1279	146.991	17341	17341	MS2	18/194	170306_chiba_GST_02.raw
	High	AEFEVHEVYAVDVLISTGEGK	Unambiguous	3	2	NP_001083993.1;NP_001085830.1		CID	1	0	1	1	42.01	0.00114885	0	33.1995	2	3	764.718	2292.14	0.150251	124.605	14572	14572	MS2	25/194	170306_chiba_GST_02.raw
	High	FTVLLMPNGPMR	Unambiguous	3	2	NP_001083993.1;NP_001085830.1		CID	1	0	1	1	41.95	0.000989308	0	55.4899	1	2	688.365	1375.72	-0.428774	88.1949	9647	9647	MS2	6/96	170306_chiba_GST_02.raw
	High	AEFEVHEVYAVDVLISTGEGK	Unambiguous	3	2	NP_001083993.1;NP_001085830.1		CID	1	0	1	1	41.44	0.00141047	0	21.0148	1	3	764.719	2292.14	0.629555	105.538	12039	12039	MS2	12/194	170306_chiba_GST_02.raw
	High	FDAMPFTLR	Unambiguous	3	2	NP_001083993.1;NP_001085830.1		CID	1	0	1	1	40.56	0.00119547	0	8.39593	0	2	549.276	1097.55	0.516111	84.2656	9090	9090	MS2	6/74	170306_chiba_GST_02.raw
	High	AEFEVHEVYAVDVLISTGEGK	Unambiguous	3	2	NP_001083993.1;NP_001085830.1		CID	1	0	1	1	40.52	0.00171221	0	36.7878	2	3	764.718	2292.14	-0.24917	106.215	12131	12131	MS2	19/194	170306_chiba_GST_02.raw
	High	AEFEVHEVYAVDVLISTGEGK	Unambiguous	3	2	NP_001083993.1;NP_001085830.1		CID	1	0	1	1	40.43	0.00163938	0	14.176	2	3	764.718	2292.14	0.469787	128.633	15096	15096	MS2	14/194	170306_chiba_GST_02.raw
	High	AEFEVHEVYAVDVLISTGEGK	Unambiguous	3	2	NP_001083993.1;NP_001085830.1		CID	1	0	1	1	40.42	0.00169762	0	40.617	2	3	764.718	2292.14	-0.169286	96.4707	10802	10802	MS2	15/194	170306_chiba_GST_02.raw
	High	AEFEVHEVYAVDVLISTGEGK	Unambiguous	3	2	NP_001083993.1;NP_001085830.1		CID	1	0	1	1	39.96	0.00198318	0	25.2546	1	3	764.718	2292.14	0.549671	104.598	11909	11909	MS2	7/194	170306_chiba_GST_02.raw
	High	AEFEVHEVYAVDVLISTGEGK	Unambiguous	3	2	NP_001083993.1;NP_001085830.1		CID	1	0	1	1	39.87	0.00170529	0	32.6356	2	3	764.719	2292.14	1.82781	111.482	12842	12842	MS2	9/194	170306_chiba_GST_02.raw
	High	AEFEVHEVYAVDVLISTGEGK	Unambiguous	3	2	NP_001083993.1;NP_001085830.1		CID	1	0	1	1	39.66	0.00197902	0	35.2601	2	3	764.718	2292.14	0.310019	105.885	12086	12086	MS2	13/194	170306_chiba_GST_02.raw
	High	IDLGVHVDGFIANVAHSFVVGASK	Unambiguous	3	2	NP_001083993.1;NP_001085830.1		CID	1	0	1	1	39.17	0.00140429	0	36.807	1	3	818.105	2452.3	0.569889	108.749	12477	12477	MS2	29/248	170306_chiba_GST_02.raw
	High	AEFEVHEVYAVDVLISTGEGK	Unambiguous	3	2	NP_001083993.1;NP_001085830.1		CID	1	0	1	1	38.98	0.00230814	0	15.877	1	3	764.718	2292.14	0.150251	115.851	13421	13421	MS2	12/194	170306_chiba_GST_02.raw
	High	AEFEVHEVYAVDVLISTGEGK	Unambiguous	3	2	NP_001083993.1;NP_001085830.1		CID	1	0	1	1	37.36	0.00332413	0	22.3954	2	3	764.718	2292.14	0.469787	113.648	13129	13129	MS2	15/194	170306_chiba_GST_02.raw
	High	AEFEVHEVYAVDVLISTGEGK	Unambiguous	3	2	NP_001083993.1;NP_001085830.1		CID	1	0	1	1	37.23	0.00371846	0	28.9276	2	3	764.718	2292.14	0.549671	96.6738	10830	10830	MS2	18/194	170306_chiba_GST_02.raw
	High	AEFEVHEVYAVDVLISTGEGK	Unambiguous	3	2	NP_001083993.1;NP_001085830.1		CID	1	0	1	1	36.43	0.00440231	0	11.5344	4	3	764.719	2292.14	0.869207	143.596	16986	16986	MS2	12/194	170306_chiba_GST_02.raw
	High	AEFEVHEVYAVDVLISTGEGK	Unambiguous	3	2	NP_001083993.1;NP_001085830.1		CID	1	0	1	1	36.29	0.00454654	0	25.6065	1	3	764.719	2292.14	0.789323	105.717	12063	12063	MS2	15/194	170306_chiba_GST_02.raw
	High	AEFEVHEVYAVDVLISTGEGK	Unambiguous	3	2	NP_001083993.1;NP_001085830.1		CID	1	0	1	1	35.15	0.00559051	0	36.8865	1	3	764.718	2292.14	0.230135	113.462	13105	13105	MS2	15/194	170306_chiba_GST_02.raw
	High	AEFEVHEVYAVDVLISTGEGK	Unambiguous	3	2	NP_001083993.1;NP_001085830.1		CID	1	0	1	1	34.59	0.00682909	0	24.3661	2	3	764.719	2292.14	0.629555	94.8692	10575	10575	MS2	14/194	170306_chiba_GST_02.raw
	High	AEFEVHEVYAVDVLISTGEGK	Unambiguous	3	2	NP_001083993.1;NP_001085830.1		CID	1	0	1	1	34.09	0.00715544	0	30.0028	2	3	764.719	2292.14	1.26863	101.232	11456	11456	MS2	19/194	170306_chiba_GST_02.raw
	High	AEFEVHEVYAVDVLISTGEGK	Unambiguous	3	2	NP_001083993.1;NP_001085830.1		CID	1	0	1	1	33.89	0.00739058	0	30.0726	2	3	764.718	2292.14	0.469787	111.128	12796	12796	MS2	23/194	170306_chiba_GST_02.raw
	High	AEFEVHEVYAVDVLISTGEGK	Unambiguous	3	2	NP_001083993.1;NP_001085830.1		CID	1	0	1	1	33.85	0.00754138	0	0	62	3	764.718	2292.14	0.310019	149.516	17565	17565	MS2	14/194	170306_chiba_GST_02.raw
	High	AEFEVHEVYAVDVLISTGEGK	Unambiguous	3	2	NP_001083993.1;NP_001085830.1		CID	1	0	1	1	33.41	0.00834548	0	12.9415	38	3	764.718	2292.14	0.310019	147.698	17413	17413	MS2	14/194	170306_chiba_GST_02.raw
	High	AEFEVHEVYAVDVLISTGEGK	Unambiguous	3	2	NP_001083993.1;NP_001085830.1		CID	1	0	1	1	33.16	0.00881582	0	28.2777	77	3	764.718	2292.14	0.150251	150.389	17639	17639	MS2	16/194	170306_chiba_GST_02.raw
	High	IDLGVHVDGFIANVAHSFVVGASK	Unambiguous	3	2	NP_001083993.1;NP_001085830.1		CID	1	0	1	1	33.14	0.0057264	0	49.0485	7	3	818.104	2452.3	-0.475447	109.078	12521	12521	MS2	22/248	170306_chiba_GST_02.raw
	High	AEFEVHEVYAVDVLISTGEGK	Unambiguous	3	2	NP_001083993.1;NP_001085830.1		CID	1	0	1	1	32.73	0.01024	0	40.1322	1	3	764.718	2292.14	-0.0894017	97.5625	10953	10953	MS2	18/194	170306_chiba_GST_02.raw
	High	AEFEVHEVYAVDVLISTGEGK	Unambiguous	3	2	NP_001083993.1;NP_001085830.1		CID	1	0	1	1	31.85	0.0121482	0	23.2352	4	3	764.717	2292.14	-0.728475	142.817	16888	16888	MS2	19/194	170306_chiba_GST_02.raw
	High	AEFEVHEVYAVDVLISTGEGK	Unambiguous	3	2	NP_001083993.1;NP_001085830.1		CID	1	0	1	1	31.73	0.0128914	0	35.2848	1	3	764.718	2292.14	0.0703665	96.0035	10736	10736	MS2	15/194	170306_chiba_GST_02.raw
	High	AEFEVHEVYAVDVLISTGEGK	Unambiguous	3	2	NP_001083993.1;NP_001085830.1		CID	1	0	1	1	31.23	0.0144644	0	25.1639	36	3	764.718	2292.14	-0.0894017	151.8	17766	17766	MS2	9/194	170306_chiba_GST_02.raw
	High	AEFEVHEVYAVDVLISTGEGK	Unambiguous	3	2	NP_001083993.1;NP_001085830.1		CID	1	0	1	1	30.93	0.014732	0	82.0681	2	3	764.718	2292.14	0.150251	96.3635	10787	10787	MS2	12/194	170306_chiba_GST_02.raw
	High	AEFEVHEVYAVDVLISTGEGK	Unambiguous	3	2	NP_001083993.1;NP_001085830.1		CID	1	0	1	1	30.77	0.0152849	0	23.0068	1	3	764.718	2292.14	0.150251	96.9652	10870	10870	MS2	14/194	170306_chiba_GST_02.raw
	High	QHVIDGEK	Unambiguous	3	2	NP_001083993.1;NP_001085830.1		CID	1	0	1	1	29.55	0.0121455	0	11.3099	0	2	463.241	925.474	0.122372	41.8595	2520	2520	MS2	4/74	170306_chiba_GST_02.raw
	High	AEFEVHEVYAVDVLISTGEGK	Unambiguous	3	2	NP_001083993.1;NP_001085830.1		CID	1	0	1	1	29.11	0.0237509	0	73.3068	1	3	764.719	2292.14	0.949091	93.1051	10332	10332	MS2	10/194	170306_chiba_GST_02.raw
	High	AEFEVHEVYAVDVLISTGEGK	Unambiguous	3	2	NP_001083993.1;NP_001085830.1		CID	1	0	1	1	28.63	0.0265266	0	20.3434	2	3	764.719	2292.14	0.949091	100.606	11369	11369	MS2	15/194	170306_chiba_GST_02.raw
NP_001079602.1	elongation factor 1-alpha, oocyte form [Xenopus laevis]	3953.73	43.38	14	3	13	100	461	50.1923	9.15869
	Confidence Level	Sequence	PSM Ambiguity	# Proteins	# Protein Groups	Protein Group Accessions	Modifications	Activation Type	ΔScore	ΔCn	Rank	Search Engine Rank	IonScore	Exp Value	# Missed Cleavages	Isolation Interference [%]	Ion Inject Time [ms]	Charge	m/z [Da]	MH+ [Da]	ΔM [ppm]	RT [min]	First Scan	Last Scan	MS Order	Ions Matched	Spectrum File
	High	NMITGTSQADCAVLIVAGGVGEFEAGISK	Unambiguous	4	2	NP_001079602.1;NP_001081521.1		CID	1	0	1	1	112.43	9.08651e-11	0	6.22932	5	2	1419.71	2838.41	1.90761	117.182	13597	13597	MS2	13/328	170306_chiba_GST_02.raw
	High	NMITGTSQADCAVLIVAGGVGEFEAGISK	Unambiguous	4	2	NP_001079602.1;NP_001081521.1		CID	1	0	1	1	109.8	1.66493e-10	0	17.9411	9	2	1419.71	2838.41	1.90761	117.864	13686	13686	MS2	16/328	170306_chiba_GST_02.raw
	High	NMITGTSQADCAVLIVAGGVGEFEAGISK	Unambiguous	4	2	NP_001079602.1;NP_001081521.1		CID	1	0	1	1	99.76	1.41614e-09	0	5.76732	1	3	946.806	2838.4	0.50516	118.218	13731	13731	MS2	21/328	170306_chiba_GST_02.raw
	High	NMITGTSQADCAVLIVAGGVGEFEAGISK	Unambiguous	4	2	NP_001079602.1;NP_001081521.1		CID	1	0	1	1	91.44	1.08028e-08	0	0	5	2	1419.71	2838.41	2.25166	118.314	13744	13744	MS2	14/328	170306_chiba_GST_02.raw
	High	NMITGTSQADCAVLIVAGGVGEFEAGISK	Unambiguous	4	2	NP_001079602.1;NP_001081521.1		CID	1	0	1	1	85.84	3.64861e-08	0	4.8518	1	3	946.806	2838.4	0.69869	119.814	13942	13942	MS2	23/328	170306_chiba_GST_02.raw
	High	NMITGTSQADCAVLIVAGGVGEFEAGISK	Unambiguous	4	2	NP_001079602.1;NP_001081521.1		CID	1	0	1	1	83.09	6.70089e-08	0	5.52546	1	3	946.805	2838.4	0.0535901	123.007	14361	14361	MS2	19/328	170306_chiba_GST_02.raw
	High	NMITGTSQADCAVLIVAGGVGEFEAGISK	Unambiguous	4	2	NP_001079602.1;NP_001081521.1		CID	1	0	1	1	82.41	8.35339e-08	0	7.50983	1	3	946.806	2838.4	0.95673	116.634	13524	13524	MS2	22/328	170306_chiba_GST_02.raw
	High	NMITGTSQADCAVLIVAGGVGEFEAGISK	Unambiguous	4	2	NP_001079602.1;NP_001081521.1		CID	1	0	1	1	75.86	3.59294e-07	0	7.44571	2	3	946.806	2838.4	0.31163	126.052	14762	14762	MS2	20/328	170306_chiba_GST_02.raw
	High	NMITGTSQADCAVLIVAGGVGEFEAGISK	Unambiguous	4	2	NP_001079602.1;NP_001081521.1		CID	1	0	1	1	74.52	4.99754e-07	0	9.93228	2	3	946.806	2838.4	0.63418	125.415	14679	14679	MS2	18/328	170306_chiba_GST_02.raw
	High	EHALLAFTLGVK	Unambiguous	3	2	NP_001079602.1;NP_001081521.1		CID	1	0	1	1	73.57	2.52736e-07	0	8.59688	0	2	649.877	1298.75	0.18059	81.1139	8635	8635	MS2	10/102	170306_chiba_GST_02.raw
	High	NMITGTSQADCAVLIVAGGVGEFEAGISK	Unambiguous	4	2	NP_001079602.1;NP_001081521.1		CID	1	0	1	1	71.59	9.25723e-07	0	5.03801	2	3	946.806	2838.4	0.44065	131.082	15411	15411	MS2	17/328	170306_chiba_GST_02.raw
	High	NMITGTSQADCAVLIVAGGVGEFEAGISK	Unambiguous	4	2	NP_001079602.1;NP_001081521.1		CID	1	0	1	1	71.47	1.00869e-06	0	3.04666	1	3	946.806	2838.4	0.63418	122.21	14256	14256	MS2	17/328	170306_chiba_GST_02.raw
	High	NMITGTSQADCAVLIVAGGVGEFEAGISK	Unambiguous	4	2	NP_001079602.1;NP_001081521.1		CID	1	0	1	1	71.31	1.07613e-06	0	3.23181	0	3	946.806	2838.4	0.95673	117.409	13626	13626	MS2	21/328	170306_chiba_GST_02.raw
	High	NMITGTSQADCAVLIVAGGVGEFEAGISK	Unambiguous	4	2	NP_001079602.1;NP_001081521.1		CID	1	0	1	1	70.38	1.21857e-06	0	6.51826	2	3	946.806	2838.4	0.37614	129.443	15201	15201	MS2	18/328	170306_chiba_GST_02.raw
	High	NMITGTSQADCAVLIVAGGVGEFEAGISK	Unambiguous	4	2	NP_001079602.1;NP_001081521.1		CID	1	0	1	1	69.95	1.3454e-06	0	7.37471	2	3	946.806	2838.4	0.37614	134.422	15831	15831	MS2	21/328	170306_chiba_GST_02.raw
	High	NMITGTSQADCAVLIVAGGVGEFEAGISK	Unambiguous	4	2	NP_001079602.1;NP_001081521.1		CID	1	0	1	1	69.7	1.41976e-06	0	9.96556	4	3	946.806	2838.4	0.56967	136.069	16042	16042	MS2	20/328	170306_chiba_GST_02.raw
	High	IGGIGTVPVGR	Unambiguous	14	3	NP_001079602.1;NP_001081521.1;NP_001080911.1		CID	1	0	1	1	69.01	1.16183e-06	0	4.45426	0	2	513.307	1025.61	-2.85089	53.2252	4383	4383	MS2	8/80	170306_chiba_GST_02.raw
	High	NMITGTSQADCAVLIVAGGVGEFEAGISK	Unambiguous	4	2	NP_001079602.1;NP_001081521.1		CID	1	0	1	1	68.05	2.16212e-06	0	10.7233	1	3	946.806	2838.4	0.24712	119.023	13837	13837	MS2	20/328	170306_chiba_GST_02.raw
	High	NMITGTSQADCAVLIVAGGVGEFEAGISK	Unambiguous	4	2	NP_001079602.1;NP_001081521.1		CID	1	0	1	1	67.93	2.22269e-06	0	74.477	3	3	946.806	2838.4	0.24712	135.274	15939	15939	MS2	18/328	170306_chiba_GST_02.raw
	High	NMITGTSQADCAVLIVAGGVGEFEAGISK	Unambiguous	4	2	NP_001079602.1;NP_001081521.1		CID	1	0	1	1	67.82	2.46142e-06	0	12.3523	11	2	1419.71	2838.4	1.21951	117.534	13643	13643	MS2	15/328	170306_chiba_GST_02.raw
	High	NMITGTSQADCAVLIVAGGVGEFEAGISK	Unambiguous	4	2	NP_001079602.1;NP_001081521.1		CID	1	0	1	1	67.22	2.589e-06	0	13.0791	2	3	946.805	2838.4	0.0535901	127.67	14972	14972	MS2	22/328	170306_chiba_GST_02.raw
	High	SGDAAIVEMIPGKPMCVETFSDYPPLGR	Unambiguous	3	1	NP_001079602.1		CID	1	0	1	1	66.52	2.89697e-06	0	20.6281	1	2	1490.72	2980.43	0.0346958	92.2762	10217	10217	MS2	9/288	170306_chiba_GST_02.raw
	High	NMITGTSQADCAVLIVAGGVGEFEAGISK	Unambiguous	4	2	NP_001079602.1;NP_001081521.1		CID	1	0	1	1	64.93	4.38665e-06	0	10.3714	1	3	946.805	2838.4	0.1181	123.797	14466	14466	MS2	17/328	170306_chiba_GST_02.raw
	High	NMITGTSQADCAVLIVAGGVGEFEAGISK	Unambiguous	4	2	NP_001079602.1;NP_001081521.1		CID	1	0	1	1	64.42	4.7164e-06	0	62.7317	25	3	946.805	2838.4	-0.0754301	145.199	17162	17162	MS2	23/328	170306_chiba_GST_02.raw
	High	NMITGTSQADCAVLIVAGGVGEFEAGISK	Unambiguous	4	2	NP_001079602.1;NP_001081521.1		CID	1	0	1	1	63.96	5.84606e-06	0	18.1369	4	3	946.806	2838.4	0.95673	136.924	16147	16147	MS2	19/328	170306_chiba_GST_02.raw
	High	NMITGTSQADCAVLIVAGGVGEFEAGISK	Unambiguous	4	2	NP_001079602.1;NP_001081521.1		CID	1	0	1	1	63.9	5.31631e-06	0	15.223	98	3	946.805	2838.4	-0.20445	150.006	17606	17606	MS2	17/328	170306_chiba_GST_02.raw
	High	NMITGTSQADCAVLIVAGGVGEFEAGISK	Unambiguous	4	2	NP_001079602.1;NP_001081521.1		CID	1	0	1	1	63.84	5.39027e-06	0	46.0662	6	3	946.805	2838.4	-0.20445	142.682	16870	16870	MS2	24/328	170306_chiba_GST_02.raw
	High	NMITGTSQADCAVLIVAGGVGEFEAGISK	Unambiguous	4	2	NP_001079602.1;NP_001081521.1		CID	1	0	1	1	63.49	6.33514e-06	0	0	45	3	946.806	2838.4	0.63418	148.711	17500	17500	MS2	16/328	170306_chiba_GST_02.raw
	High	NMITGTSQADCAVLIVAGGVGEFEAGISK	Unambiguous	4	2	NP_001079602.1;NP_001081521.1		CID	1	0	1	1	62.59	7.38082e-06	0	14.844	72	3	946.805	2838.4	-0.33347	149.201	17540	17540	MS2	22/328	170306_chiba_GST_02.raw
	High	NMITGTSQADCAVLIVAGGVGEFEAGISK	Unambiguous	4	2	NP_001079602.1;NP_001081521.1		CID	1	0	1	1	62.39	7.87286e-06	0	8.34129	2	3	946.805	2838.4	0.1181	130.246	15306	15306	MS2	21/328	170306_chiba_GST_02.raw
	High	NMITGTSQADCAVLIVAGGVGEFEAGISK	Unambiguous	4	2	NP_001079602.1;NP_001081521.1		CID	1	0	1	1	61.99	9.5178e-06	0	19.5281	15	3	946.807	2838.41	1.73085	144.46	17089	17089	MS2	16/328	170306_chiba_GST_02.raw
	High	YYITIIDAPGHR	Unambiguous	5	1	NP_001079602.1		CID	1	0	1	1	61.28	1.65703e-05	0	4.84409	0	3	473.586	1418.74	-0.00096311	69.3086	6885	6885	MS2	21/94	170306_chiba_GST_02.raw
	High	IGGIGTVPVGR	Unambiguous	14	3	NP_001079602.1;NP_001081521.1;NP_001080911.1		CID	1	0	1	1	60.05	9.04526e-06	0	61.8274	11	2	513.309	1025.61	-0.113376	130.145	15293	15293	MS2	9/80	170306_chiba_GST_02.raw
	High	NMITGTSQADCAVLIVAGGVGEFEAGISK	Unambiguous	4	2	NP_001079602.1;NP_001081521.1		CID	1	0	1	1	60.04	1.38716e-05	0	5.97221	1	3	946.806	2838.4	0.69869	120.619	14049	14049	MS2	18/328	170306_chiba_GST_02.raw
	High	EGNASGITLLEALDCIIPPQRPTNKPLR	Unambiguous	3	1	NP_001079602.1		CID	1	0	1	1	59.46	7.41722e-06	0	26.7265	1	3	1006.21	3016.63	0.931316	107.193	12265	12265	MS2	15/310	170306_chiba_GST_02.raw
	High	NMITGTSQADCAVLIVAGGVGEFEAGISK	Unambiguous	4	2	NP_001079602.1;NP_001081521.1		CID	1	0	1	1	58.23	2.11191e-05	0	19.0214	2	3	946.806	2838.4	0.7632	124.634	14576	14576	MS2	23/328	170306_chiba_GST_02.raw
	High	QTVAVGVIK	Unambiguous	13	3	NP_001079602.1;NP_001081521.1;NP_001080911.1		CID	1	0	1	1	57.88	2.51726e-05	0	5.76417	0	2	457.787	914.567	0.27992	49.3055	3754	3754	MS2	7/80	170306_chiba_GST_02.raw
	High	NMITGTSQADCAVLIVAGGVGEFEAGISK	Unambiguous	4	2	NP_001079602.1;NP_001081521.1		CID	1	0	1	1	57.3	2.63485e-05	0	80.3413	55	3	946.806	2838.4	0.63418	149.711	17581	17581	MS2	31/328	170306_chiba_GST_02.raw
	High	NMITGTSQADCAVLIVAGGVGEFEAGISK	Unambiguous	4	2	NP_001079602.1;NP_001081521.1		CID	1	0	1	1	57.07	2.60145e-05	0	4.25176	1	3	946.806	2838.4	0.56967	121.418	14153	14153	MS2	15/328	170306_chiba_GST_02.raw
	High	YYITIIDAPGHR	Unambiguous	5	1	NP_001079602.1		CID	1	0	1	1	56.88	4.56384e-05	0	24.7279	0	2	709.875	1418.74	0.00851458	69.3148	6886	6886	MS2	7/94	170306_chiba_GST_02.raw
	High	NMITGTSQADCAVLIVAGGVGEFEAGISK	Unambiguous	4	2	NP_001079602.1;NP_001081521.1		CID	1	0	1	1	56.75	2.61016e-05	0	10.4755	2	3	946.803	2838.39	-2.65584	128.64	15097	15097	MS2	16/328	170306_chiba_GST_02.raw
	High	IGGIGTVPVGR	Unambiguous	14	3	NP_001079602.1;NP_001081521.1;NP_001080911.1		CID	1	0	1	1	55.44	2.6147e-05	0	61.6297	1	2	513.309	1025.61	-0.113376	57.5244	5060	5060	MS2	8/80	170306_chiba_GST_02.raw
	High	NMITGTSQADCAVLIVAGGVGEFEAGISK	Unambiguous	4	2	NP_001079602.1;NP_001081521.1		CID	1	0	1	1	54.49	4.8188e-05	0	7.18763	4	3	946.805	2838.4	-0.397981	140.3	16568	16568	MS2	17/328	170306_chiba_GST_02.raw
	High	VETGVLKPGMIVTFAPSNVTTEVK	Unambiguous	5	2	NP_001079602.1;NP_001081521.1		CID	1	0	1	1	54.14	2.00449e-05	0	9.58555	1	2	1259.19	2517.37	0.739135	81.7005	8721	8721	MS2	13/258	170306_chiba_GST_02.raw
	High	NMITGTSQADCAVLIVAGGVGEFEAGISK	Unambiguous	4	2	NP_001079602.1;NP_001081521.1		CID	1	0	1	1	53.41	6.38452e-05	0	0	6	3	946.806	2838.4	0.69869	143.516	16976	16976	MS2	19/328	170306_chiba_GST_02.raw
	High	IGGIGTVPVGR	Unambiguous	14	3	NP_001079602.1;NP_001081521.1;NP_001080911.1		CID	1	0	1	1	53.12	4.46089e-05	0	75.1221	13	2	513.309	1025.61	0.243691	134.304	15816	15816	MS2	9/80	170306_chiba_GST_02.raw
	High	NMITGTSQADCAVLIVAGGVGEFEAGISK	Unambiguous	4	2	NP_001079602.1;NP_001081521.1		CID	1	0	1	1	52.87	7.10073e-05	0	28.8232	19	3	946.805	2838.4	0.18261	143.415	16964	16964	MS2	24/328	170306_chiba_GST_02.raw
	High	NMITGTSQADCAVLIVAGGVGEFEAGISK	Unambiguous	4	2	NP_001079602.1;NP_001081521.1		CID	1	0	1	1	52.51	7.88272e-05	0	3.29149	21	3	946.806	2838.4	0.7632	146.165	17261	17261	MS2	19/328	170306_chiba_GST_02.raw
	High	NMITGTSQADCAVLIVAGGVGEFEAGISK	Unambiguous	4	2	NP_001079602.1;NP_001081521.1		CID	1	0	1	1	52.04	8.62738e-05	0	73.6709	38	3	946.806	2838.4	0.24712	147.874	17429	17429	MS2	17/328	170306_chiba_GST_02.raw
	High	IGGIGTVPVGR	Unambiguous	14	3	NP_001079602.1;NP_001081521.1;NP_001080911.1		CID	1	0	1	1	50.57	8.02456e-05	0	81.8069	13	2	513.309	1025.61	0.243691	139.506	16469	16469	MS2	8/80	170306_chiba_GST_02.raw
	High	NMITGTSQADCAVLIVAGGVGEFEAGISK	Unambiguous	4	2	NP_001079602.1;NP_001081521.1		CID	1	0	1	1	50.54	0.000122307	0	8.43971	2	3	946.806	2838.4	0.31163	141.794	16755	16755	MS2	15/328	170306_chiba_GST_02.raw
	High	LPLQDVYK	Unambiguous	17	3	NP_001079602.1;NP_001081521.1;NP_001080911.1		CID	1	0	1	1	50.44	0.000107986	0	10.7042	0	2	488.279	975.551	-0.291652	57.8803	5114	5114	MS2	7/64	170306_chiba_GST_02.raw
	High	SGDAAIVEMIPGKPMCVETFSDYPPLGR	Unambiguous	3	1	NP_001079602.1		CID	1	0	1	1	50.21	0.00012434	0	25.2403	0	3	994.147	2980.43	0.173535	92.7749	10287	10287	MS2	22/288	170306_chiba_GST_02.raw
	High	NMITGTSQADCAVLIVAGGVGEFEAGISK	Unambiguous	4	2	NP_001079602.1;NP_001081521.1		CID	1	0	1	1	49.91	0.000143442	0	10.4617	3	2	1419.71	2838.4	0.789441	116.877	13557	13557	MS2	16/328	170306_chiba_GST_02.raw
	High	SGDAAIVEMIPGKPMCVETFSDYPPLGR	Unambiguous	3	1	NP_001079602.1		CID	1	0	1	1	49.33	0.000149935	0	4.90844	0	3	994.147	2980.43	0.234971	91.8789	10161	10161	MS2	16/288	170306_chiba_GST_02.raw
	High	NMITGTSQADCAVLIVAGGVGEFEAGISK	Unambiguous	4	2	NP_001079602.1;NP_001081521.1		CID	1	0	1	1	49.14	0.000170049	0	51.9211	100	3	946.806	2838.4	0.89222	150.582	17656	17656	MS2	22/328	170306_chiba_GST_02.raw
	High	IGGIGTVPVGR	Unambiguous	14	3	NP_001079602.1;NP_001081521.1;NP_001080911.1		CID	1	0	1	1	48.93	0.000117063	0	38.9978	10	2	513.309	1025.61	-0.232398	129.716	15237	15237	MS2	8/80	170306_chiba_GST_02.raw
	High	NMITGTSQADCAVLIVAGGVGEFEAGISK	Unambiguous	4	2	NP_001079602.1;NP_001081521.1		CID	1	0	1	1	48.81	0.000182159	0	14.7877	3	3	946.806	2838.4	0.31163	131.946	15518	15518	MS2	21/328	170306_chiba_GST_02.raw
	High	IGGIGTVPVGR	Unambiguous	14	3	NP_001079602.1;NP_001081521.1;NP_001080911.1		CID	1	0	1	1	48.77	0.000120793	0	45.1856	18	2	513.309	1025.61	0.481735	137.75	16248	16248	MS2	8/80	170306_chiba_GST_02.raw
	High	NMITGTSQADCAVLIVAGGVGEFEAGISK	Unambiguous	4	2	NP_001079602.1;NP_001081521.1		CID	1	0	1	1	48.5	0.00019493	0	13.6598	4	3	946.806	2838.4	0.24712	139.462	16463	16463	MS2	19/328	170306_chiba_GST_02.raw
	High	IGGIGTVPVGR	Unambiguous	14	3	NP_001079602.1;NP_001081521.1;NP_001080911.1		CID	1	0	1	1	48.34	0.000134098	0	86.9104	12	2	513.309	1025.61	-0.113376	141.105	16668	16668	MS2	9/80	170306_chiba_GST_02.raw
	High	NMITGTSQADCAVLIVAGGVGEFEAGISK	Unambiguous	4	2	NP_001079602.1;NP_001081521.1		CID	1	0	1	1	47.91	0.000220868	0	10.6458	5	3	946.805	2838.4	0.1181	140.621	16609	16609	MS2	15/328	170306_chiba_GST_02.raw
	High	STTTGHLIYK	Unambiguous	15	3	NP_001079602.1;NP_001081521.1;NP_001080911.1		CID	1	0	1	1	47.02	0.00044985	0	31.8333	0	2	560.804	1120.6	0.378329	44.8602	3024	3024	MS2	10/78	170306_chiba_GST_02.raw
	High	VETGVLKPGmIVTFAPSNVTTEVK	Unambiguous	5	2	NP_001079602.1;NP_001081521.1	M10(Oxidation)	CID	1	0	1	1	46.27	0.000165233	0	4.98596	0	3	845.125	2533.36	0.688508	77.3289	8084	8084	MS2	25/258	170306_chiba_GST_02.raw
	High	YYITIIDAPGHR	Unambiguous	5	1	NP_001079602.1		CID	1	0	1	1	45.76	0.00059065	0	32.9097	1	2	709.875	1418.74	-0.0775266	70.0867	7005	7005	MS2	7/94	170306_chiba_GST_02.raw
	High	IGGIGTVPVGR	Unambiguous	14	3	NP_001079602.1;NP_001081521.1;NP_001080911.1		CID	1	0	1	1	45.75	0.000242126	0	57.9885	12	2	513.309	1025.61	0.600757	135.698	15994	15994	MS2	9/80	170306_chiba_GST_02.raw
	High	NMITGTSQADCAVLIVAGGVGEFEAGISK	Unambiguous	4	2	NP_001079602.1;NP_001081521.1		CID	1	0	1	1	45.73	0.000388922	0	0	84	3	946.805	2838.4	-0.591511	149.925	17599	17599	MS2	31/328	170306_chiba_GST_02.raw
	High	IGGIGTVPVGR	Unambiguous	14	3	NP_001079602.1;NP_001081521.1;NP_001080911.1		CID	1	0	1	1	45.52	0.000255294	0	63.2897	10	2	513.309	1025.61	0.719779	134.821	15882	15882	MS2	8/80	170306_chiba_GST_02.raw
	High	VETGVLKPGMIVTFAPSNVTTEVK	Unambiguous	5	2	NP_001079602.1;NP_001081521.1		CID	1	0	1	1	45.35	0.000164835	0	1.7948	0	3	839.793	2517.36	0.515583	81.6412	8712	8712	MS2	22/258	170306_chiba_GST_02.raw
	High	EHALLAFTLGVK	Unambiguous	3	2	NP_001079602.1;NP_001081521.1		CID	1	0	1	1	44.87	0.000187356	0	5.62108	0	3	433.587	1298.75	0.0527483	81.1259	8637	8637	MS2	17/102	170306_chiba_GST_02.raw
	High	IGGIGTVPVGR	Unambiguous	14	3	NP_001079602.1;NP_001081521.1;NP_001080911.1		CID	1	0	1	1	44.49	0.000325403	0	59.4389	14	2	513.309	1025.61	0.243691	128.768	15113	15113	MS2	7/80	170306_chiba_GST_02.raw
	High	IGGIGTVPVGR	Unambiguous	14	3	NP_001079602.1;NP_001081521.1;NP_001080911.1		CID	1	0	1	1	44.46	0.000327658	0	65.4692	15	2	513.309	1025.61	0.00564633	139.837	16511	16511	MS2	7/80	170306_chiba_GST_02.raw
	High	IGGIGTVPVGR	Unambiguous	14	3	NP_001079602.1;NP_001081521.1;NP_001080911.1		CID	1	0	1	1	43.6	0.000397229	0	57.1654	14	2	513.309	1025.61	0.481735	141.763	16751	16751	MS2	9/80	170306_chiba_GST_02.raw
	High	IGGIGTVPVGR	Unambiguous	14	3	NP_001079602.1;NP_001081521.1;NP_001080911.1		CID	1	0	1	1	43.17	0.000440982	0	67.3362	13	2	513.309	1025.61	-0.113376	136.015	16035	16035	MS2	8/80	170306_chiba_GST_02.raw
	High	NMITGTSQADCAVLIVAGGVGEFEAGISK	Unambiguous	4	2	NP_001079602.1;NP_001081521.1		CID	1	0	1	1	42.39	0.000764216	0	66.3063	3	3	946.806	2838.4	0.56967	132.766	15622	15622	MS2	19/328	170306_chiba_GST_02.raw
	High	IGGIGTVPVGR	Unambiguous	14	3	NP_001079602.1;NP_001081521.1;NP_001080911.1		CID	1	0	1	1	42.09	0.000562395	0	44.2642	84	2	513.309	1025.61	0.600757	147.925	17434	17434	MS2	8/80	170306_chiba_GST_02.raw
	High	QLIIGVNK	Unambiguous	5	2	NP_001079602.1;NP_001081521.1		CID	0.3095	0	1	1	41.59	0.000842512	0	5.61938	0	2	442.782	884.556	-0.45725	53.3609	4405	4405	MS2	7/72	170306_chiba_GST_02.raw
	High	NMITGTSQADCAVLIVAGGVGEFEAGISK	Unambiguous	4	2	NP_001079602.1;NP_001081521.1		CID	1	0	1	1	40.39	0.00127519	0	70.3873	3	3	946.806	2838.4	0.89222	133.578	15726	15726	MS2	31/328	170306_chiba_GST_02.raw
	High	IGGIGTVPVGR	Unambiguous	14	3	NP_001079602.1;NP_001081521.1;NP_001080911.1		CID	1	0	1	1	39.76	0.000961704	0	59.5958	12	2	513.309	1025.61	0.481735	135.313	15944	15944	MS2	8/80	170306_chiba_GST_02.raw
	High	NMITGTSQADCAVLIVAGGVGEFEAGISK	Unambiguous	4	2	NP_001079602.1;NP_001081521.1		CID	1	0	1	1	39.32	0.00174255	0	10.7198	2	3	946.806	2838.4	1.21477	126.859	14867	14867	MS2	30/328	170306_chiba_GST_02.raw
	High	IHINIVVIGHVDSGK	Unambiguous	3	2	NP_001079602.1;NP_001081521.1		CID	1	0	1	1	38.97	0.000868342	0	41.8374	1	3	534.31	1600.92	-0.187478	70.8967	7126	7126	MS2	17/136	170306_chiba_GST_02.raw
	High	IGGIGTVPVGR	Unambiguous	14	3	NP_001079602.1;NP_001081521.1;NP_001080911.1		CID	1	0	1	1	38.78	0.00121177	0	72.814	36	2	513.308	1025.61	-0.708487	145.577	17201	17201	MS2	8/80	170306_chiba_GST_02.raw
	High	IHINIVVIGHVDSGK	Unambiguous	3	2	NP_001079602.1;NP_001081521.1		CID	1	0	1	1	38.67	0.00069274	0	26.2096	1	3	534.311	1600.92	0.61315	71.4882	7214	7214	MS2	9/136	170306_chiba_GST_02.raw
	High	FEEITK	Unambiguous	7	2	NP_001079602.1;NP_001081521.1		CID	0.1053	0	1	1	38.31	0.00110678	0	14.8242	0	2	383.703	766.398	0.157481	45.6411	3154	3154	MS2	5/46	170306_chiba_GST_02.raw
	High	IGGIGTVPVGR	Unambiguous	14	3	NP_001079602.1;NP_001081521.1;NP_001080911.1		CID	1	0	1	1	38.15	0.00141626	0	68.051	13	2	513.308	1025.61	-1.18458	143.328	16953	16953	MS2	9/80	170306_chiba_GST_02.raw
	High	NMITGTSQADCAVLIVAGGVGEFEAGISK	Unambiguous	4	2	NP_001079602.1;NP_001081521.1		CID	1	0	1	1	37.71	0.00253304	0	36.418	3	2	1419.71	2838.41	1.64957	117.021	13576	13576	MS2	26/328	170306_chiba_GST_02.raw
	High	IGGIGTVPVGR	Unambiguous	14	3	NP_001079602.1;NP_001081521.1;NP_001080911.1		CID	1	0	1	1	37.6	0.0015814	0	60.6096	10	2	513.309	1025.61	0.362713	127.107	14899	14899	MS2	8/80	170306_chiba_GST_02.raw
	High	IGGIGTVPVGR	Unambiguous	14	3	NP_001079602.1;NP_001081521.1;NP_001080911.1		CID	1	0	1	1	37.19	0.00174752	0	60.4915	10	2	513.309	1025.61	0.00564633	133.303	15691	15691	MS2	9/80	170306_chiba_GST_02.raw
	High	NMITGTSQADCAVLIVAGGVGEFEAGISK	Unambiguous	4	2	NP_001079602.1;NP_001081521.1		CID	1	0	1	1	37.1	0.00261279	0	1.80242	3	3	946.806	2838.4	0.50516	140.976	16652	16652	MS2	30/328	170306_chiba_GST_02.raw
	High	IGGIGTVPVGR	Unambiguous	14	3	NP_001079602.1;NP_001081521.1;NP_001080911.1		CID	1	0	1	1	36.3	0.00216841	0	73.4075	1	2	513.308	1025.61	-1.18458	56.714	4934	4934	MS2	7/80	170306_chiba_GST_02.raw
	High	IGGIGTVPVGR	Unambiguous	14	3	NP_001079602.1;NP_001081521.1;NP_001080911.1		CID	1	0	1	1	36.17	0.00221015	0	64.8254	13	2	513.309	1025.61	-0.470442	128.411	15068	15068	MS2	7/80	170306_chiba_GST_02.raw
	High	NMITGTSQADCAVLIVAGGVGEFEAGISK	Unambiguous	4	2	NP_001079602.1;NP_001081521.1		CID	1	0	1	1	36.17	0.0035628	0	8.26286	85	3	946.805	2838.4	-0.720531	151.077	17701	17701	MS2	27/328	170306_chiba_GST_02.raw
	High	NMITGTSQADCAVLIVAGGVGEFEAGISK	Unambiguous	4	2	NP_001079602.1;NP_001081521.1		CID	1	0	1	1	35.85	0.00367923	0	12.9057	4	3	946.806	2838.4	0.63418	137.794	16254	16254	MS2	13/328	170306_chiba_GST_02.raw
	High	IGGIGTVPVGR	Unambiguous	14	3	NP_001079602.1;NP_001081521.1;NP_001080911.1		CID	1	0	1	1	34.53	0.00320657	0	53.4333	10	2	513.309	1025.61	0.600757	132.346	15569	15569	MS2	8/80	170306_chiba_GST_02.raw
	High	IGGIGTVPVGR	Unambiguous	14	3	NP_001079602.1;NP_001081521.1;NP_001080911.1		CID	1	0	1	1	33.62	0.00397577	0	52.3116	15	2	513.309	1025.61	-0.232398	143.123	16927	16927	MS2	8/80	170306_chiba_GST_02.raw
	High	VETGVLKPGMIVTFAPSNVTTEVK	Unambiguous	5	2	NP_001079602.1;NP_001081521.1		CID	1	0	1	1	33.28	0.00206753	0	1.25218	0	3	839.793	2517.36	0.00642444	82.4966	8838	8838	MS2	19/258	170306_chiba_GST_02.raw
	High	NMITGTSQADCAVLIVAGGVGEFEAGISK	Unambiguous	4	2	NP_001079602.1;NP_001081521.1		CID	1	0	1	1	33.14	0.00662419	0	12.6363	21	2	1419.7	2838.4	0.0153207	118.037	13708	13708	MS2	14/328	170306_chiba_GST_02.raw
	High	IGGIGTVPVGR	Unambiguous	14	3	NP_001079602.1;NP_001081521.1;NP_001080911.1		CID	1	0	1	1	31.22	0.00690909	0	37.5866	69	2	513.309	1025.61	0.243691	148.735	17502	17502	MS2	8/80	170306_chiba_GST_02.raw
	High	SGDAAIVEMIPGKPMCVETFSDYPPLGR	Unambiguous	3	1	NP_001079602.1		CID	1	0	1	1	30.43	0.0118651	0	21.5711	1	2	1490.72	2980.43	0.198525	92.3962	10234	10234	MS2	26/288	170306_chiba_GST_02.raw
	High	IGGIGTVPVGR	Unambiguous	14	3	NP_001079602.1;NP_001081521.1;NP_001080911.1		CID	1	0	1	1	30.35	0.0083954	0	40.952	100	2	513.309	1025.61	0.481735	149.805	17589	17589	MS2	8/80	170306_chiba_GST_02.raw
NP_001081521.1	elongation factor 1-alpha, oocyte form [Xenopus laevis]	3843.64	37.31	11	2	12	99	461	50.0913	9.17334
	Confidence Level	Sequence	PSM Ambiguity	# Proteins	# Protein Groups	Protein Group Accessions	Modifications	Activation Type	ΔScore	ΔCn	Rank	Search Engine Rank	IonScore	Exp Value	# Missed Cleavages	Isolation Interference [%]	Ion Inject Time [ms]	Charge	m/z [Da]	MH+ [Da]	ΔM [ppm]	RT [min]	First Scan	Last Scan	MS Order	Ions Matched	Spectrum File
	High	NMITGTSQADCAVLIVAGGVGEFEAGISK	Unambiguous	4	2	NP_001079602.1;NP_001081521.1		CID	1	0	1	1	112.43	9.08651e-11	0	6.22932	5	2	1419.71	2838.41	1.90761	117.182	13597	13597	MS2	13/328	170306_chiba_GST_02.raw
	High	NMITGTSQADCAVLIVAGGVGEFEAGISK	Unambiguous	4	2	NP_001079602.1;NP_001081521.1		CID	1	0	1	1	109.8	1.66493e-10	0	17.9411	9	2	1419.71	2838.41	1.90761	117.864	13686	13686	MS2	16/328	170306_chiba_GST_02.raw
	High	NMITGTSQADCAVLIVAGGVGEFEAGISK	Unambiguous	4	2	NP_001079602.1;NP_001081521.1		CID	1	0	1	1	99.76	1.41614e-09	0	5.76732	1	3	946.806	2838.4	0.50516	118.218	13731	13731	MS2	21/328	170306_chiba_GST_02.raw
	High	NMITGTSQADCAVLIVAGGVGEFEAGISK	Unambiguous	4	2	NP_001079602.1;NP_001081521.1		CID	1	0	1	1	91.44	1.08028e-08	0	0	5	2	1419.71	2838.41	2.25166	118.314	13744	13744	MS2	14/328	170306_chiba_GST_02.raw
	High	NMITGTSQADCAVLIVAGGVGEFEAGISK	Unambiguous	4	2	NP_001079602.1;NP_001081521.1		CID	1	0	1	1	85.84	3.64861e-08	0	4.8518	1	3	946.806	2838.4	0.69869	119.814	13942	13942	MS2	23/328	170306_chiba_GST_02.raw
	High	NMITGTSQADCAVLIVAGGVGEFEAGISK	Unambiguous	4	2	NP_001079602.1;NP_001081521.1		CID	1	0	1	1	83.09	6.70089e-08	0	5.52546	1	3	946.805	2838.4	0.0535901	123.007	14361	14361	MS2	19/328	170306_chiba_GST_02.raw
	High	NMITGTSQADCAVLIVAGGVGEFEAGISK	Unambiguous	4	2	NP_001079602.1;NP_001081521.1		CID	1	0	1	1	82.41	8.35339e-08	0	7.50983	1	3	946.806	2838.4	0.95673	116.634	13524	13524	MS2	22/328	170306_chiba_GST_02.raw
	High	NMITGTSQADCAVLIVAGGVGEFEAGISK	Unambiguous	4	2	NP_001079602.1;NP_001081521.1		CID	1	0	1	1	75.86	3.59294e-07	0	7.44571	2	3	946.806	2838.4	0.31163	126.052	14762	14762	MS2	20/328	170306_chiba_GST_02.raw
	High	NMITGTSQADCAVLIVAGGVGEFEAGISK	Unambiguous	4	2	NP_001079602.1;NP_001081521.1		CID	1	0	1	1	74.52	4.99754e-07	0	9.93228	2	3	946.806	2838.4	0.63418	125.415	14679	14679	MS2	18/328	170306_chiba_GST_02.raw
	High	EHALLAFTLGVK	Unambiguous	3	2	NP_001079602.1;NP_001081521.1		CID	1	0	1	1	73.57	2.52736e-07	0	8.59688	0	2	649.877	1298.75	0.18059	81.1139	8635	8635	MS2	10/102	170306_chiba_GST_02.raw
	High	NMITGTSQADCAVLIVAGGVGEFEAGISK	Unambiguous	4	2	NP_001079602.1;NP_001081521.1		CID	1	0	1	1	71.59	9.25723e-07	0	5.03801	2	3	946.806	2838.4	0.44065	131.082	15411	15411	MS2	17/328	170306_chiba_GST_02.raw
	High	NMITGTSQADCAVLIVAGGVGEFEAGISK	Unambiguous	4	2	NP_001079602.1;NP_001081521.1		CID	1	0	1	1	71.47	1.00869e-06	0	3.04666	1	3	946.806	2838.4	0.63418	122.21	14256	14256	MS2	17/328	170306_chiba_GST_02.raw
	High	NMITGTSQADCAVLIVAGGVGEFEAGISK	Unambiguous	4	2	NP_001079602.1;NP_001081521.1		CID	1	0	1	1	71.31	1.07613e-06	0	3.23181	0	3	946.806	2838.4	0.95673	117.409	13626	13626	MS2	21/328	170306_chiba_GST_02.raw
	High	NMITGTSQADCAVLIVAGGVGEFEAGISK	Unambiguous	4	2	NP_001079602.1;NP_001081521.1		CID	1	0	1	1	70.38	1.21857e-06	0	6.51826	2	3	946.806	2838.4	0.37614	129.443	15201	15201	MS2	18/328	170306_chiba_GST_02.raw
	High	NMITGTSQADCAVLIVAGGVGEFEAGISK	Unambiguous	4	2	NP_001079602.1;NP_001081521.1		CID	1	0	1	1	69.95	1.3454e-06	0	7.37471	2	3	946.806	2838.4	0.37614	134.422	15831	15831	MS2	21/328	170306_chiba_GST_02.raw
	High	NMITGTSQADCAVLIVAGGVGEFEAGISK	Unambiguous	4	2	NP_001079602.1;NP_001081521.1		CID	1	0	1	1	69.7	1.41976e-06	0	9.96556	4	3	946.806	2838.4	0.56967	136.069	16042	16042	MS2	20/328	170306_chiba_GST_02.raw
	High	IGGIGTVPVGR	Unambiguous	14	3	NP_001079602.1;NP_001081521.1;NP_001080911.1		CID	1	0	1	1	69.01	1.16183e-06	0	4.45426	0	2	513.307	1025.61	-2.85089	53.2252	4383	4383	MS2	8/80	170306_chiba_GST_02.raw
	High	NMITGTSQADCAVLIVAGGVGEFEAGISK	Unambiguous	4	2	NP_001079602.1;NP_001081521.1		CID	1	0	1	1	68.05	2.16212e-06	0	10.7233	1	3	946.806	2838.4	0.24712	119.023	13837	13837	MS2	20/328	170306_chiba_GST_02.raw
	High	NMITGTSQADCAVLIVAGGVGEFEAGISK	Unambiguous	4	2	NP_001079602.1;NP_001081521.1		CID	1	0	1	1	67.93	2.22269e-06	0	74.477	3	3	946.806	2838.4	0.24712	135.274	15939	15939	MS2	18/328	170306_chiba_GST_02.raw
	High	NMITGTSQADCAVLIVAGGVGEFEAGISK	Unambiguous	4	2	NP_001079602.1;NP_001081521.1		CID	1	0	1	1	67.82	2.46142e-06	0	12.3523	11	2	1419.71	2838.4	1.21951	117.534	13643	13643	MS2	15/328	170306_chiba_GST_02.raw
	High	NMITGTSQADCAVLIVAGGVGEFEAGISK	Unambiguous	4	2	NP_001079602.1;NP_001081521.1		CID	1	0	1	1	67.22	2.589e-06	0	13.0791	2	3	946.805	2838.4	0.0535901	127.67	14972	14972	MS2	22/328	170306_chiba_GST_02.raw
	High	NMITGTSQADCAVLIVAGGVGEFEAGISK	Unambiguous	4	2	NP_001079602.1;NP_001081521.1		CID	1	0	1	1	64.93	4.38665e-06	0	10.3714	1	3	946.805	2838.4	0.1181	123.797	14466	14466	MS2	17/328	170306_chiba_GST_02.raw
	High	NMITGTSQADCAVLIVAGGVGEFEAGISK	Unambiguous	4	2	NP_001079602.1;NP_001081521.1		CID	1	0	1	1	64.42	4.7164e-06	0	62.7317	25	3	946.805	2838.4	-0.0754301	145.199	17162	17162	MS2	23/328	170306_chiba_GST_02.raw
	High	NMITGTSQADCAVLIVAGGVGEFEAGISK	Unambiguous	4	2	NP_001079602.1;NP_001081521.1		CID	1	0	1	1	63.96	5.84606e-06	0	18.1369	4	3	946.806	2838.4	0.95673	136.924	16147	16147	MS2	19/328	170306_chiba_GST_02.raw
	High	NMITGTSQADCAVLIVAGGVGEFEAGISK	Unambiguous	4	2	NP_001079602.1;NP_001081521.1		CID	1	0	1	1	63.9	5.31631e-06	0	15.223	98	3	946.805	2838.4	-0.20445	150.006	17606	17606	MS2	17/328	170306_chiba_GST_02.raw
	High	NMITGTSQADCAVLIVAGGVGEFEAGISK	Unambiguous	4	2	NP_001079602.1;NP_001081521.1		CID	1	0	1	1	63.84	5.39027e-06	0	46.0662	6	3	946.805	2838.4	-0.20445	142.682	16870	16870	MS2	24/328	170306_chiba_GST_02.raw
	High	NMITGTSQADCAVLIVAGGVGEFEAGISK	Unambiguous	4	2	NP_001079602.1;NP_001081521.1		CID	1	0	1	1	63.49	6.33514e-06	0	0	45	3	946.806	2838.4	0.63418	148.711	17500	17500	MS2	16/328	170306_chiba_GST_02.raw
	High	NMITGTSQADCAVLIVAGGVGEFEAGISK	Unambiguous	4	2	NP_001079602.1;NP_001081521.1		CID	1	0	1	1	62.59	7.38082e-06	0	14.844	72	3	946.805	2838.4	-0.33347	149.201	17540	17540	MS2	22/328	170306_chiba_GST_02.raw
	High	NMITGTSQADCAVLIVAGGVGEFEAGISK	Unambiguous	4	2	NP_001079602.1;NP_001081521.1		CID	1	0	1	1	62.39	7.87286e-06	0	8.34129	2	3	946.805	2838.4	0.1181	130.246	15306	15306	MS2	21/328	170306_chiba_GST_02.raw
	High	NMITGTSQADCAVLIVAGGVGEFEAGISK	Unambiguous	4	2	NP_001079602.1;NP_001081521.1		CID	1	0	1	1	61.99	9.5178e-06	0	19.5281	15	3	946.807	2838.41	1.73085	144.46	17089	17089	MS2	16/328	170306_chiba_GST_02.raw
	High	IGGIGTVPVGR	Unambiguous	14	3	NP_001079602.1;NP_001081521.1;NP_001080911.1		CID	1	0	1	1	60.05	9.04526e-06	0	61.8274	11	2	513.309	1025.61	-0.113376	130.145	15293	15293	MS2	9/80	170306_chiba_GST_02.raw
	High	NMITGTSQADCAVLIVAGGVGEFEAGISK	Unambiguous	4	2	NP_001079602.1;NP_001081521.1		CID	1	0	1	1	60.04	1.38716e-05	0	5.97221	1	3	946.806	2838.4	0.69869	120.619	14049	14049	MS2	18/328	170306_chiba_GST_02.raw
	High	NMITGTSQADCAVLIVAGGVGEFEAGISK	Unambiguous	4	2	NP_001079602.1;NP_001081521.1		CID	1	0	1	1	58.23	2.11191e-05	0	19.0214	2	3	946.806	2838.4	0.7632	124.634	14576	14576	MS2	23/328	170306_chiba_GST_02.raw
	High	QTVAVGVIK	Unambiguous	13	3	NP_001079602.1;NP_001081521.1;NP_001080911.1		CID	1	0	1	1	57.88	2.51726e-05	0	5.76417	0	2	457.787	914.567	0.27992	49.3055	3754	3754	MS2	7/80	170306_chiba_GST_02.raw
	High	NMITGTSQADCAVLIVAGGVGEFEAGISK	Unambiguous	4	2	NP_001079602.1;NP_001081521.1		CID	1	0	1	1	57.3	2.63485e-05	0	80.3413	55	3	946.806	2838.4	0.63418	149.711	17581	17581	MS2	31/328	170306_chiba_GST_02.raw
	High	NMITGTSQADCAVLIVAGGVGEFEAGISK	Unambiguous	4	2	NP_001079602.1;NP_001081521.1		CID	1	0	1	1	57.07	2.60145e-05	0	4.25176	1	3	946.806	2838.4	0.56967	121.418	14153	14153	MS2	15/328	170306_chiba_GST_02.raw
	High	NMITGTSQADCAVLIVAGGVGEFEAGISK	Unambiguous	4	2	NP_001079602.1;NP_001081521.1		CID	1	0	1	1	56.75	2.61016e-05	0	10.4755	2	3	946.803	2838.39	-2.65584	128.64	15097	15097	MS2	16/328	170306_chiba_GST_02.raw
	High	IGGIGTVPVGR	Unambiguous	14	3	NP_001079602.1;NP_001081521.1;NP_001080911.1		CID	1	0	1	1	55.44	2.6147e-05	0	61.6297	1	2	513.309	1025.61	-0.113376	57.5244	5060	5060	MS2	8/80	170306_chiba_GST_02.raw
	High	NMITGTSQADCAVLIVAGGVGEFEAGISK	Unambiguous	4	2	NP_001079602.1;NP_001081521.1		CID	1	0	1	1	54.49	4.8188e-05	0	7.18763	4	3	946.805	2838.4	-0.397981	140.3	16568	16568	MS2	17/328	170306_chiba_GST_02.raw
	High	VETGVLKPGMIVTFAPSNVTTEVK	Unambiguous	5	2	NP_001079602.1;NP_001081521.1		CID	1	0	1	1	54.14	2.00449e-05	0	9.58555	1	2	1259.19	2517.37	0.739135	81.7005	8721	8721	MS2	13/258	170306_chiba_GST_02.raw
	High	FYITIIDAPGHR	Unambiguous	1	1	NP_001081521.1		CID	1	0	1	1	53.87	5.29163e-05	0	5.22029	0	3	468.254	1402.75	0.257552	77.0447	8042	8042	MS2	15/94	170306_chiba_GST_02.raw
	High	FYITIIDAPGHR	Unambiguous	1	1	NP_001081521.1		CID	1	0	1	1	53.45	5.94191e-05	0	7.47346	0	2	701.878	1402.75	0.462937	77.0508	8043	8043	MS2	7/94	170306_chiba_GST_02.raw
	High	NMITGTSQADCAVLIVAGGVGEFEAGISK	Unambiguous	4	2	NP_001079602.1;NP_001081521.1		CID	1	0	1	1	53.41	6.38452e-05	0	0	6	3	946.806	2838.4	0.69869	143.516	16976	16976	MS2	19/328	170306_chiba_GST_02.raw
	High	IGGIGTVPVGR	Unambiguous	14	3	NP_001079602.1;NP_001081521.1;NP_001080911.1		CID	1	0	1	1	53.12	4.46089e-05	0	75.1221	13	2	513.309	1025.61	0.243691	134.304	15816	15816	MS2	9/80	170306_chiba_GST_02.raw
	High	NMITGTSQADCAVLIVAGGVGEFEAGISK	Unambiguous	4	2	NP_001079602.1;NP_001081521.1		CID	1	0	1	1	52.87	7.10073e-05	0	28.8232	19	3	946.805	2838.4	0.18261	143.415	16964	16964	MS2	24/328	170306_chiba_GST_02.raw
	High	NMITGTSQADCAVLIVAGGVGEFEAGISK	Unambiguous	4	2	NP_001079602.1;NP_001081521.1		CID	1	0	1	1	52.51	7.88272e-05	0	3.29149	21	3	946.806	2838.4	0.7632	146.165	17261	17261	MS2	19/328	170306_chiba_GST_02.raw
	High	NMITGTSQADCAVLIVAGGVGEFEAGISK	Unambiguous	4	2	NP_001079602.1;NP_001081521.1		CID	1	0	1	1	52.04	8.62738e-05	0	73.6709	38	3	946.806	2838.4	0.24712	147.874	17429	17429	MS2	17/328	170306_chiba_GST_02.raw
	High	IGGIGTVPVGR	Unambiguous	14	3	NP_001079602.1;NP_001081521.1;NP_001080911.1		CID	1	0	1	1	50.57	8.02456e-05	0	81.8069	13	2	513.309	1025.61	0.243691	139.506	16469	16469	MS2	8/80	170306_chiba_GST_02.raw
	High	NMITGTSQADCAVLIVAGGVGEFEAGISK	Unambiguous	4	2	NP_001079602.1;NP_001081521.1		CID	1	0	1	1	50.54	0.000122307	0	8.43971	2	3	946.806	2838.4	0.31163	141.794	16755	16755	MS2	15/328	170306_chiba_GST_02.raw
	High	LPLQDVYK	Unambiguous	17	3	NP_001079602.1;NP_001081521.1;NP_001080911.1		CID	1	0	1	1	50.44	0.000107986	0	10.7042	0	2	488.279	975.551	-0.291652	57.8803	5114	5114	MS2	7/64	170306_chiba_GST_02.raw
	High	NMITGTSQADCAVLIVAGGVGEFEAGISK	Unambiguous	4	2	NP_001079602.1;NP_001081521.1		CID	1	0	1	1	49.91	0.000143442	0	10.4617	3	2	1419.71	2838.4	0.789441	116.877	13557	13557	MS2	16/328	170306_chiba_GST_02.raw
	High	NMITGTSQADCAVLIVAGGVGEFEAGISK	Unambiguous	4	2	NP_001079602.1;NP_001081521.1		CID	1	0	1	1	49.14	0.000170049	0	51.9211	100	3	946.806	2838.4	0.89222	150.582	17656	17656	MS2	22/328	170306_chiba_GST_02.raw
	High	IGGIGTVPVGR	Unambiguous	14	3	NP_001079602.1;NP_001081521.1;NP_001080911.1		CID	1	0	1	1	48.93	0.000117063	0	38.9978	10	2	513.309	1025.61	-0.232398	129.716	15237	15237	MS2	8/80	170306_chiba_GST_02.raw
	High	NMITGTSQADCAVLIVAGGVGEFEAGISK	Unambiguous	4	2	NP_001079602.1;NP_001081521.1		CID	1	0	1	1	48.81	0.000182159	0	14.7877	3	3	946.806	2838.4	0.31163	131.946	15518	15518	MS2	21/328	170306_chiba_GST_02.raw
	High	IGGIGTVPVGR	Unambiguous	14	3	NP_001079602.1;NP_001081521.1;NP_001080911.1		CID	1	0	1	1	48.77	0.000120793	0	45.1856	18	2	513.309	1025.61	0.481735	137.75	16248	16248	MS2	8/80	170306_chiba_GST_02.raw
	High	NMITGTSQADCAVLIVAGGVGEFEAGISK	Unambiguous	4	2	NP_001079602.1;NP_001081521.1		CID	1	0	1	1	48.5	0.00019493	0	13.6598	4	3	946.806	2838.4	0.24712	139.462	16463	16463	MS2	19/328	170306_chiba_GST_02.raw
	High	IGGIGTVPVGR	Unambiguous	14	3	NP_001079602.1;NP_001081521.1;NP_001080911.1		CID	1	0	1	1	48.34	0.000134098	0	86.9104	12	2	513.309	1025.61	-0.113376	141.105	16668	16668	MS2	9/80	170306_chiba_GST_02.raw
	High	NMITGTSQADCAVLIVAGGVGEFEAGISK	Unambiguous	4	2	NP_001079602.1;NP_001081521.1		CID	1	0	1	1	47.91	0.000220868	0	10.6458	5	3	946.805	2838.4	0.1181	140.621	16609	16609	MS2	15/328	170306_chiba_GST_02.raw
	High	STTTGHLIYK	Unambiguous	15	3	NP_001079602.1;NP_001081521.1;NP_001080911.1		CID	1	0	1	1	47.02	0.00044985	0	31.8333	0	2	560.804	1120.6	0.378329	44.8602	3024	3024	MS2	10/78	170306_chiba_GST_02.raw
	High	VETGVLKPGmIVTFAPSNVTTEVK	Unambiguous	5	2	NP_001079602.1;NP_001081521.1	M10(Oxidation)	CID	1	0	1	1	46.27	0.000165233	0	4.98596	0	3	845.125	2533.36	0.688508	77.3289	8084	8084	MS2	25/258	170306_chiba_GST_02.raw
	High	IGGIGTVPVGR	Unambiguous	14	3	NP_001079602.1;NP_001081521.1;NP_001080911.1		CID	1	0	1	1	45.75	0.000242126	0	57.9885	12	2	513.309	1025.61	0.600757	135.698	15994	15994	MS2	9/80	170306_chiba_GST_02.raw
	High	NMITGTSQADCAVLIVAGGVGEFEAGISK	Unambiguous	4	2	NP_001079602.1;NP_001081521.1		CID	1	0	1	1	45.73	0.000388922	0	0	84	3	946.805	2838.4	-0.591511	149.925	17599	17599	MS2	31/328	170306_chiba_GST_02.raw
	High	IGGIGTVPVGR	Unambiguous	14	3	NP_001079602.1;NP_001081521.1;NP_001080911.1		CID	1	0	1	1	45.52	0.000255294	0	63.2897	10	2	513.309	1025.61	0.719779	134.821	15882	15882	MS2	8/80	170306_chiba_GST_02.raw
	High	VETGVLKPGMIVTFAPSNVTTEVK	Unambiguous	5	2	NP_001079602.1;NP_001081521.1		CID	1	0	1	1	45.35	0.000164835	0	1.7948	0	3	839.793	2517.36	0.515583	81.6412	8712	8712	MS2	22/258	170306_chiba_GST_02.raw
	High	EHALLAFTLGVK	Unambiguous	3	2	NP_001079602.1;NP_001081521.1		CID	1	0	1	1	44.87	0.000187356	0	5.62108	0	3	433.587	1298.75	0.0527483	81.1259	8637	8637	MS2	17/102	170306_chiba_GST_02.raw
	High	IGGIGTVPVGR	Unambiguous	14	3	NP_001079602.1;NP_001081521.1;NP_001080911.1		CID	1	0	1	1	44.49	0.000325403	0	59.4389	14	2	513.309	1025.61	0.243691	128.768	15113	15113	MS2	7/80	170306_chiba_GST_02.raw
	High	IGGIGTVPVGR	Unambiguous	14	3	NP_001079602.1;NP_001081521.1;NP_001080911.1		CID	1	0	1	1	44.46	0.000327658	0	65.4692	15	2	513.309	1025.61	0.00564633	139.837	16511	16511	MS2	7/80	170306_chiba_GST_02.raw
	High	IGGIGTVPVGR	Unambiguous	14	3	NP_001079602.1;NP_001081521.1;NP_001080911.1		CID	1	0	1	1	43.6	0.000397229	0	57.1654	14	2	513.309	1025.61	0.481735	141.763	16751	16751	MS2	9/80	170306_chiba_GST_02.raw
	High	IGGIGTVPVGR	Unambiguous	14	3	NP_001079602.1;NP_001081521.1;NP_001080911.1		CID	1	0	1	1	43.17	0.000440982	0	67.3362	13	2	513.309	1025.61	-0.113376	136.015	16035	16035	MS2	8/80	170306_chiba_GST_02.raw
	High	SGDAAIVEMIPGKPMCVESFSDYPPLGR	Unambiguous	2	1	NP_001081521.1		CID	1	0	1	1	42.5	0.000598894	0	9.40194	0	3	989.475	2966.41	0.614866	91.2899	10080	10080	MS2	20/288	170306_chiba_GST_02.raw
	High	NMITGTSQADCAVLIVAGGVGEFEAGISK	Unambiguous	4	2	NP_001079602.1;NP_001081521.1		CID	1	0	1	1	42.39	0.000764216	0	66.3063	3	3	946.806	2838.4	0.56967	132.766	15622	15622	MS2	19/328	170306_chiba_GST_02.raw
	High	IGGIGTVPVGR	Unambiguous	14	3	NP_001079602.1;NP_001081521.1;NP_001080911.1		CID	1	0	1	1	42.09	0.000562395	0	44.2642	84	2	513.309	1025.61	0.600757	147.925	17434	17434	MS2	8/80	170306_chiba_GST_02.raw
	High	QLIIGVNK	Unambiguous	5	2	NP_001079602.1;NP_001081521.1		CID	0.3095	0	1	1	41.59	0.000842512	0	5.61938	0	2	442.782	884.556	-0.45725	53.3609	4405	4405	MS2	7/72	170306_chiba_GST_02.raw
	High	NMITGTSQADCAVLIVAGGVGEFEAGISK	Unambiguous	4	2	NP_001079602.1;NP_001081521.1		CID	1	0	1	1	40.39	0.00127519	0	70.3873	3	3	946.806	2838.4	0.89222	133.578	15726	15726	MS2	31/328	170306_chiba_GST_02.raw
	High	IGGIGTVPVGR	Unambiguous	14	3	NP_001079602.1;NP_001081521.1;NP_001080911.1		CID	1	0	1	1	39.76	0.000961704	0	59.5958	12	2	513.309	1025.61	0.481735	135.313	15944	15944	MS2	8/80	170306_chiba_GST_02.raw
	High	NMITGTSQADCAVLIVAGGVGEFEAGISK	Unambiguous	4	2	NP_001079602.1;NP_001081521.1		CID	1	0	1	1	39.32	0.00174255	0	10.7198	2	3	946.806	2838.4	1.21477	126.859	14867	14867	MS2	30/328	170306_chiba_GST_02.raw
	High	IHINIVVIGHVDSGK	Unambiguous	3	2	NP_001079602.1;NP_001081521.1		CID	1	0	1	1	38.97	0.000868342	0	41.8374	1	3	534.31	1600.92	-0.187478	70.8967	7126	7126	MS2	17/136	170306_chiba_GST_02.raw
	High	SGDAAIVEMIPGKPMCVESFSDYPPLGR	Unambiguous	2	1	NP_001081521.1		CID	1	0	1	1	38.86	0.00138468	0	15.0846	1	3	989.475	2966.41	0.491414	92.568	10259	10259	MS2	18/288	170306_chiba_GST_02.raw
	High	IGGIGTVPVGR	Unambiguous	14	3	NP_001079602.1;NP_001081521.1;NP_001080911.1		CID	1	0	1	1	38.78	0.00121177	0	72.814	36	2	513.308	1025.61	-0.708487	145.577	17201	17201	MS2	8/80	170306_chiba_GST_02.raw
	High	IHINIVVIGHVDSGK	Unambiguous	3	2	NP_001079602.1;NP_001081521.1		CID	1	0	1	1	38.67	0.00069274	0	26.2096	1	3	534.311	1600.92	0.61315	71.4882	7214	7214	MS2	9/136	170306_chiba_GST_02.raw
	High	FEEITK	Unambiguous	7	2	NP_001079602.1;NP_001081521.1		CID	0.1053	0	1	1	38.31	0.00110678	0	14.8242	0	2	383.703	766.398	0.157481	45.6411	3154	3154	MS2	5/46	170306_chiba_GST_02.raw
	High	IGGIGTVPVGR	Unambiguous	14	3	NP_001079602.1;NP_001081521.1;NP_001080911.1		CID	1	0	1	1	38.15	0.00141626	0	68.051	13	2	513.308	1025.61	-1.18458	143.328	16953	16953	MS2	9/80	170306_chiba_GST_02.raw
	High	NMITGTSQADCAVLIVAGGVGEFEAGISK	Unambiguous	4	2	NP_001079602.1;NP_001081521.1		CID	1	0	1	1	37.71	0.00253304	0	36.418	3	2	1419.71	2838.41	1.64957	117.021	13576	13576	MS2	26/328	170306_chiba_GST_02.raw
	High	IGGIGTVPVGR	Unambiguous	14	3	NP_001079602.1;NP_001081521.1;NP_001080911.1		CID	1	0	1	1	37.6	0.0015814	0	60.6096	10	2	513.309	1025.61	0.362713	127.107	14899	14899	MS2	8/80	170306_chiba_GST_02.raw
	High	SGDAAIVEMIPGKPMCVESFSDYPPLGR	Unambiguous	2	1	NP_001081521.1		CID	1	0	1	1	37.23	0.00201535	0	7.83686	0	3	989.475	2966.41	0.614866	92.0485	10185	10185	MS2	19/288	170306_chiba_GST_02.raw
	High	IGGIGTVPVGR	Unambiguous	14	3	NP_001079602.1;NP_001081521.1;NP_001080911.1		CID	1	0	1	1	37.19	0.00174752	0	60.4915	10	2	513.309	1025.61	0.00564633	133.303	15691	15691	MS2	9/80	170306_chiba_GST_02.raw
	High	NMITGTSQADCAVLIVAGGVGEFEAGISK	Unambiguous	4	2	NP_001079602.1;NP_001081521.1		CID	1	0	1	1	37.1	0.00261279	0	1.80242	3	3	946.806	2838.4	0.50516	140.976	16652	16652	MS2	30/328	170306_chiba_GST_02.raw
	High	IGGIGTVPVGR	Unambiguous	14	3	NP_001079602.1;NP_001081521.1;NP_001080911.1		CID	1	0	1	1	36.3	0.00216841	0	73.4075	1	2	513.308	1025.61	-1.18458	56.714	4934	4934	MS2	7/80	170306_chiba_GST_02.raw
	High	IGGIGTVPVGR	Unambiguous	14	3	NP_001079602.1;NP_001081521.1;NP_001080911.1		CID	1	0	1	1	36.17	0.00221015	0	64.8254	13	2	513.309	1025.61	-0.470442	128.411	15068	15068	MS2	7/80	170306_chiba_GST_02.raw
	High	NMITGTSQADCAVLIVAGGVGEFEAGISK	Unambiguous	4	2	NP_001079602.1;NP_001081521.1		CID	1	0	1	1	36.17	0.0035628	0	8.26286	85	3	946.805	2838.4	-0.720531	151.077	17701	17701	MS2	27/328	170306_chiba_GST_02.raw
	High	NMITGTSQADCAVLIVAGGVGEFEAGISK	Unambiguous	4	2	NP_001079602.1;NP_001081521.1		CID	1	0	1	1	35.85	0.00367923	0	12.9057	4	3	946.806	2838.4	0.63418	137.794	16254	16254	MS2	13/328	170306_chiba_GST_02.raw
	High	IGGIGTVPVGR	Unambiguous	14	3	NP_001079602.1;NP_001081521.1;NP_001080911.1		CID	1	0	1	1	34.53	0.00320657	0	53.4333	10	2	513.309	1025.61	0.600757	132.346	15569	15569	MS2	8/80	170306_chiba_GST_02.raw
	High	IGGIGTVPVGR	Unambiguous	14	3	NP_001079602.1;NP_001081521.1;NP_001080911.1		CID	1	0	1	1	33.62	0.00397577	0	52.3116	15	2	513.309	1025.61	-0.232398	143.123	16927	16927	MS2	8/80	170306_chiba_GST_02.raw
	High	SGDAAIVEMIPGKPMCVESFSDYPPLGR	Unambiguous	2	1	NP_001081521.1		CID	1	0	1	1	33.3	0.00481767	0	5.78131	1	2	1483.71	2966.41	0.290192	91.8004	10151	10151	MS2	20/288	170306_chiba_GST_02.raw
	High	VETGVLKPGMIVTFAPSNVTTEVK	Unambiguous	5	2	NP_001079602.1;NP_001081521.1		CID	1	0	1	1	33.28	0.00206753	0	1.25218	0	3	839.793	2517.36	0.00642444	82.4966	8838	8838	MS2	19/258	170306_chiba_GST_02.raw
	High	NMITGTSQADCAVLIVAGGVGEFEAGISK	Unambiguous	4	2	NP_001079602.1;NP_001081521.1		CID	1	0	1	1	33.14	0.00662419	0	12.6363	21	2	1419.7	2838.4	0.0153207	118.037	13708	13708	MS2	14/328	170306_chiba_GST_02.raw
	High	IGGIGTVPVGR	Unambiguous	14	3	NP_001079602.1;NP_001081521.1;NP_001080911.1		CID	1	0	1	1	31.22	0.00690909	0	37.5866	69	2	513.309	1025.61	0.243691	148.735	17502	17502	MS2	8/80	170306_chiba_GST_02.raw
	High	IGGIGTVPVGR	Unambiguous	14	3	NP_001079602.1;NP_001081521.1;NP_001080911.1		CID	1	0	1	1	30.35	0.0083954	0	40.952	100	2	513.309	1025.61	0.481735	149.805	17589	17589	MS2	8/80	170306_chiba_GST_02.raw
	High	SGDAAIVEMIPGKPMCVESFSDYPPLGR	Unambiguous	2	1	NP_001081521.1		CID	1	0	1	1	29.71	0.0134166	0	6.94396	1	2	1483.71	2966.41	1.68932	91.9958	10178	10178	MS2	28/288	170306_chiba_GST_02.raw
NP_001080325.1	40S ribosomal protein S3a-A [Xenopus laevis]	3742.88	57.58	1	3	17	67	264	29.9218	9.71533
	Confidence Level	Sequence	PSM Ambiguity	# Proteins	# Protein Groups	Protein Group Accessions	Modifications	Activation Type	ΔScore	ΔCn	Rank	Search Engine Rank	IonScore	Exp Value	# Missed Cleavages	Isolation Interference [%]	Ion Inject Time [ms]	Charge	m/z [Da]	MH+ [Da]	ΔM [ppm]	RT [min]	First Scan	Last Scan	MS Order	Ions Matched	Spectrum File
	High	VFEVSLADLQNDEVAFR	Unambiguous	2	2	NP_001080325.1;NP_001104210.1		CID	1	0	1	1	130.04	1.67451e-12	0	2.67602	1	2	976.492	1951.98	0.646125	96.8568	10855	10855	MS2	24/162	170306_chiba_GST_02.raw
	High	VFEVSLADLQNDEVAFR	Unambiguous	2	2	NP_001080325.1;NP_001104210.1		CID	1	0	1	1	108.83	1.98341e-10	0	39.8085	27	2	976.492	1951.98	0.458514	136.17	16055	16055	MS2	13/162	170306_chiba_GST_02.raw
	High	VFEVSLADLQNDEVAFR	Unambiguous	2	2	NP_001080325.1;NP_001104210.1		CID	1	0	1	1	104.78	4.92336e-10	0	4.92023	0	2	976.492	1951.98	0.208367	95.061	10602	10602	MS2	21/162	170306_chiba_GST_02.raw
	High	VFEVSLADLQNDEVAFR	Unambiguous	2	2	NP_001080325.1;NP_001104210.1		CID	1	0	1	1	102.95	7.52881e-10	0	39.7783	30	2	976.492	1951.98	0.0207572	133.514	15718	15718	MS2	11/162	170306_chiba_GST_02.raw
	High	LMELHGEGGGTGKPAGDETGAK	Unambiguous	1	1	NP_001080325.1		CID	0.4747	0	1	1	99.22	1.63953e-09	0	0.856046	0	2	1056.51	2112	0.920912	44.5971	2981	2981	MS2	19/218	170306_chiba_GST_02.raw
	High	VFEVSLADLQNDEVAFR	Unambiguous	2	2	NP_001080325.1;NP_001104210.1		CID	1	0	1	1	98.35	2.16402e-09	0	29.8677	3	2	976.492	1951.98	0.270904	102.345	11607	11607	MS2	12/162	170306_chiba_GST_02.raw
	High	VFEVSLADLQNDEVAFR	Unambiguous	2	2	NP_001080325.1;NP_001104210.1		CID	1	0	1	1	96.6	3.23789e-09	0	8.78394	0	2	976.492	1951.98	0.208367	95.9547	10729	10729	MS2	10/162	170306_chiba_GST_02.raw
	High	VFEVSLADLQNDEVAFR	Unambiguous	2	2	NP_001080325.1;NP_001104210.1		CID	1	0	1	1	93.4	6.74205e-09	0	35.4926	19	2	976.492	1951.98	0.333441	141.724	16746	16746	MS2	12/162	170306_chiba_GST_02.raw
	High	VFEVSLADLQNDEVAFR	Unambiguous	2	2	NP_001080325.1;NP_001104210.1		CID	1	0	1	1	90.62	1.28744e-08	0	27.8184	14	2	976.492	1951.98	-0.0417796	130.519	15340	15340	MS2	12/162	170306_chiba_GST_02.raw
	High	VFEVSLADLQNDEVAFR	Unambiguous	2	2	NP_001080325.1;NP_001104210.1		CID	1	0	1	1	90.32	1.37487e-08	0	13.0438	1	2	976.492	1951.98	0.208367	97.6478	10965	10965	MS2	19/162	170306_chiba_GST_02.raw
	High	VFEVSLADLQNDEVAFR	Unambiguous	2	2	NP_001080325.1;NP_001104210.1		CID	1	0	1	1	90.19	1.45015e-08	0	55.5906	34	2	976.492	1951.98	0.521051	142.214	16809	16809	MS2	10/162	170306_chiba_GST_02.raw
	High	VFEVSLADLQNDEVAFR	Unambiguous	2	2	NP_001080325.1;NP_001104210.1		CID	1	0	1	1	90.13	1.47032e-08	0	27.4782	15	2	976.492	1951.98	0.521051	129.575	15218	15218	MS2	10/162	170306_chiba_GST_02.raw
	High	VFEVSLADLQNDEVAFR	Unambiguous	2	2	NP_001080325.1;NP_001104210.1		CID	1	0	1	1	90.06	1.45969e-08	0	0	44	2	976.491	1951.98	-0.354464	136.355	16077	16077	MS2	10/162	170306_chiba_GST_02.raw
	High	VFEVSLADLQNDEVAFR	Unambiguous	2	2	NP_001080325.1;NP_001104210.1		CID	1	0	1	1	89.67	1.6346e-08	0	31.0804	18	2	976.492	1951.98	0.458514	121.214	14127	14127	MS2	10/162	170306_chiba_GST_02.raw
	High	ACQSIYPLHDVYVR	Unambiguous	1	1	NP_001080325.1		CID	1	0	1	1	88.33	2.18136e-08	0	5.70412	0	2	832.417	1663.83	0.346463	68.4886	6759	6759	MS2	9/138	170306_chiba_GST_02.raw
	High	VFEVSLADLQNDEVAFR	Unambiguous	2	2	NP_001080325.1;NP_001104210.1		CID	1	0	1	1	86.75	3.13853e-08	0	21.9777	58	2	976.491	1951.98	-0.22939	144.184	17057	17057	MS2	19/162	170306_chiba_GST_02.raw
	High	VFEVSLADLQNDEVAFR	Unambiguous	2	2	NP_001080325.1;NP_001104210.1		CID	1	0	1	1	86.73	3.16363e-08	0	39.4825	11	2	976.492	1951.98	0.395978	125.028	14627	14627	MS2	19/162	170306_chiba_GST_02.raw
	High	VFEVSLADLQNDEVAFR	Unambiguous	2	2	NP_001080325.1;NP_001104210.1		CID	1	0	1	1	86.72	3.22413e-08	0	7.04342	13	2	976.492	1951.98	0.521051	135.536	15973	15973	MS2	11/162	170306_chiba_GST_02.raw
	High	VFEVSLADLQNDEVAFR	Unambiguous	2	2	NP_001080325.1;NP_001104210.1		CID	1	0	1	1	86.24	3.51772e-08	0	6.21267	0	2	976.492	1951.98	0.208367	94.2986	10497	10497	MS2	11/162	170306_chiba_GST_02.raw
	High	VFEVSLADLQNDEVAFR	Unambiguous	2	2	NP_001080325.1;NP_001104210.1		CID	1	0	1	1	85.73	3.98278e-08	0	27.0313	2	2	976.492	1951.98	0.395978	102.027	11564	11564	MS2	10/162	170306_chiba_GST_02.raw
	High	VFEVSLADLQNDEVAFR	Unambiguous	2	2	NP_001080325.1;NP_001104210.1		CID	1	0	1	1	85.65	4.05682e-08	0	15.7613	1	2	976.492	1951.98	0.395978	99.4962	11218	11218	MS2	10/162	170306_chiba_GST_02.raw
	High	VFEVSLADLQNDEVAFR	Unambiguous	2	2	NP_001080325.1;NP_001104210.1		CID	1	0	1	1	83.2	7.08373e-08	0	4.56982	0	3	651.33	1951.98	0.17021	95.0682	10603	10603	MS2	13/162	170306_chiba_GST_02.raw
	High	VFEVSLADLQNDEVAFR	Unambiguous	2	2	NP_001080325.1;NP_001104210.1		CID	1	0	1	1	82.14	9.74453e-08	0	14.2502	2	2	976.493	1951.98	0.958808	101.86	11541	11541	MS2	19/162	170306_chiba_GST_02.raw
	High	VFEVSLADLQNDEVAFR	Unambiguous	2	2	NP_001080325.1;NP_001104210.1		CID	1	0	1	1	82.04	9.28381e-08	0	30.5628	100	2	976.492	1951.98	-0.104316	148.805	17508	17508	MS2	9/162	170306_chiba_GST_02.raw
	High	VFEVSLADLQNDEVAFR	Unambiguous	2	2	NP_001080325.1;NP_001104210.1		CID	1	0	1	1	81.46	1.17535e-07	0	70.8268	20	2	976.491	1951.98	-0.417001	138.08	16290	16290	MS2	11/162	170306_chiba_GST_02.raw
	High	VFEVSLADLQNDEVAFR	Unambiguous	2	2	NP_001080325.1;NP_001104210.1		CID	1	0	1	1	80.66	1.31859e-07	0	17.2829	100	2	976.491	1951.97	-1.04237	150.439	17643	17643	MS2	11/162	170306_chiba_GST_02.raw
	High	VFEVSLADLQNDEVAFR	Unambiguous	2	2	NP_001080325.1;NP_001104210.1		CID	1	0	1	1	79.6	1.62827e-07	0	28.0721	26	2	976.492	1951.98	0.0207572	141.42	16708	16708	MS2	19/162	170306_chiba_GST_02.raw
	High	VFEVSLADLQNDEVAFR	Unambiguous	2	2	NP_001080325.1;NP_001104210.1		CID	1	0	1	1	79.6	1.62279e-07	0	44.353	24	2	976.492	1951.98	0.145831	135.676	15991	15991	MS2	19/162	170306_chiba_GST_02.raw
	High	VFEVSLADLQNDEVAFR	Unambiguous	2	2	NP_001080325.1;NP_001104210.1		CID	1	0	1	1	79.48	1.67952e-07	0	24.5219	46	2	976.492	1951.98	0.395978	139.257	16437	16437	MS2	19/162	170306_chiba_GST_02.raw
	High	VFEVSLADLQNDEVAFR	Unambiguous	2	2	NP_001080325.1;NP_001104210.1		CID	1	0	1	1	78.94	1.88913e-07	0	36.0749	3	2	976.492	1951.98	0.145831	101.388	11477	11477	MS2	11/162	170306_chiba_GST_02.raw
	High	VFEVSLADLQNDEVAFR	Unambiguous	2	2	NP_001080325.1;NP_001104210.1		CID	1	0	1	1	77.59	2.86527e-07	0	16.1438	44	2	976.491	1951.98	-0.479537	140.577	16604	16604	MS2	9/162	170306_chiba_GST_02.raw
	High	VFEVSLADLQNDEVAFR	Unambiguous	2	2	NP_001080325.1;NP_001104210.1		CID	1	0	1	1	77.44	3.02907e-07	0	18.0118	3	2	976.492	1951.98	0.708661	102.446	11621	11621	MS2	12/162	170306_chiba_GST_02.raw
	High	VFEVSLADLQNDEVAFR	Unambiguous	2	2	NP_001080325.1;NP_001104210.1		CID	1	0	1	1	77.35	2.73355e-07	0	44.6389	11	2	976.492	1951.98	-0.104316	118.664	13789	13789	MS2	9/162	170306_chiba_GST_02.raw
	High	VFEVSLADLQNDEVAFR	Unambiguous	2	2	NP_001080325.1;NP_001104210.1		CID	1	0	1	1	76.9	3.04219e-07	0	24.3817	1	2	976.492	1951.98	0.395978	101.025	11427	11427	MS2	12/162	170306_chiba_GST_02.raw
	High	VFEVSLADLQNDEVAFR	Unambiguous	2	2	NP_001080325.1;NP_001104210.1		CID	1	0	1	1	76.74	3.82364e-07	0	14.317	5	2	976.493	1951.98	1.14642	101.267	11461	11461	MS2	11/162	170306_chiba_GST_02.raw
	High	NCLTNFHGMDLTR	Unambiguous	2	2	NP_001080325.1;NP_001104210.1		CID	1	0	1	1	76.63	1.49916e-07	0	21.1114	1	2	761.351	1521.69	0.40891	70.0801	7004	7004	MS2	11/136	170306_chiba_GST_02.raw
	High	VFEVSLADLQNDEVAFR	Unambiguous	2	2	NP_001080325.1;NP_001104210.1		CID	1	0	1	1	74.89	4.91375e-07	0	37.2411	1	2	976.492	1951.98	0.521051	98.6994	11109	11109	MS2	12/162	170306_chiba_GST_02.raw
	High	VFEVSLADLQNDEVAFR	Unambiguous	2	2	NP_001080325.1;NP_001104210.1		CID	1	0	1	1	73.85	6.09904e-07	0	6.09219	0	3	651.33	1951.98	0.0764053	94.3126	10499	10499	MS2	12/162	170306_chiba_GST_02.raw
	High	KTSYAQHQQVR	Unambiguous	2	2	NP_001080325.1;NP_001104210.1		CID	1	0	1	1	71.34	1.52779e-06	1	2.35	5	2	673.352	1345.7	-0.514654	41.1668	2407	2407	MS2	9/102	170306_chiba_GST_02.raw
	High	LITEDVQGK	Unambiguous	2	2	NP_001080325.1;NP_001104210.1		CID	1	0	1	1	69.2	2.95757e-06	0	5.1103	0	2	501.777	1002.55	0.63589	46.2056	3249	3249	MS2	13/72	170306_chiba_GST_02.raw
	High	VFEVSLADLQNDEVAFR	Unambiguous	2	2	NP_001080325.1;NP_001104210.1		CID	1	0	1	1	68.98	1.88446e-06	0	15.2655	9	2	976.492	1951.98	0.395978	128.182	15039	15039	MS2	21/162	170306_chiba_GST_02.raw
	High	VFEVSLADLQNDEVAFR	Unambiguous	2	2	NP_001080325.1;NP_001104210.1		CID	1	0	1	1	66.02	3.70051e-06	0	8.70675	1	3	651.33	1951.98	0.0764053	95.9621	10730	10730	MS2	10/162	170306_chiba_GST_02.raw
	High	VFEVSLADLQNDEVAFR	Unambiguous	2	2	NP_001080325.1;NP_001104210.1		CID	1	0	1	1	65.55	4.22097e-06	0	65.6294	4	2	976.492	1951.98	0.458514	104.845	11943	11943	MS2	10/162	170306_chiba_GST_02.raw
	High	VFEVSLADLQNDEVAFR	Unambiguous	2	2	NP_001080325.1;NP_001104210.1		CID	1	0	1	1	64.51	5.22146e-06	0	33.9059	1	2	976.492	1951.98	0.333441	100.274	11324	11324	MS2	11/162	170306_chiba_GST_02.raw
	High	TSYAQHQQVR	Unambiguous	2	2	NP_001080325.1;NP_001104210.1		CID	1	0	1	1	62.55	6.86542e-06	0	1.63023	0	2	609.305	1217.6	0.132408	41.8537	2519	2519	MS2	8/84	170306_chiba_GST_02.raw
	High	TTDGYLLR	Unambiguous	2	2	NP_001080325.1;NP_001104210.1		CID	1	0	1	1	62.06	9.77011e-06	0	9.50725	0	2	469.751	938.494	0.311243	52.4463	4261	4261	MS2	7/60	170306_chiba_GST_02.raw
	High	LmELHGEGGGTGKPAGDETGAK	Unambiguous	1	1	NP_001080325.1	M2(Oxidation)	CID	0.459	0	1	1	60.55	7.75323e-06	0	3.27603	0	3	710.004	2128	0.19959	42.9893	2712	2712	MS2	20/218	170306_chiba_GST_02.raw
	High	VFEVSLADLQNDEVAFR	Unambiguous	2	2	NP_001080325.1;NP_001104210.1		CID	1	0	1	1	57.71	2.50762e-05	0	81.6586	1	3	651.33	1951.98	0.264016	99.6709	11243	11243	MS2	13/162	170306_chiba_GST_02.raw
	High	KTSYAQHQQVR	Unambiguous	2	2	NP_001080325.1;NP_001104210.1		CID	1	0	1	1	57.36	4.00365e-05	1	5.77371	0	3	449.237	1345.7	0.0196233	41.0772	2391	2391	MS2	9/102	170306_chiba_GST_02.raw
	High	VFEVSLADLQNDEVAFR	Unambiguous	2	2	NP_001080325.1;NP_001104210.1		CID	1	0	1	1	54	5.89199e-05	0	42.1268	1	3	651.33	1951.98	0.17021	97.1159	10891	10891	MS2	21/162	170306_chiba_GST_02.raw
	High	VFEVSLADLQNDEVAFR	Unambiguous	2	2	NP_001080325.1;NP_001104210.1		CID	1	0	1	1	53.2	8.08885e-05	0	66.9653	2	3	651.331	1951.98	0.639236	99.5439	11225	11225	MS2	12/162	170306_chiba_GST_02.raw
	High	LMELHGEGGGTGKPAGDETGAK	Unambiguous	1	1	NP_001080325.1		CID	0.1961	0	1	1	51.05	0.000108755	0	1.30495	0	3	704.673	2112	0.683352	44.5797	2978	2978	MS2	22/218	170306_chiba_GST_02.raw
	High	APAMFNIR	Unambiguous	2	2	NP_001080325.1;NP_001104210.1		CID	1	0	1	1	48.98	0.000464158	0	5.70581	0	2	460.245	919.482	-0.101376	66.0196	6382	6382	MS2	7/62	170306_chiba_GST_02.raw
	High	APAMFNIR	Unambiguous	2	2	NP_001080325.1;NP_001104210.1		CID	1	0	1	1	45.8	0.000965308	0	18.1893	0	2	460.245	919.482	-0.101376	66.8531	6510	6510	MS2	7/62	170306_chiba_GST_02.raw
	High	MFEIMTR	Unambiguous	1	1	NP_001080325.1		CID	1	0	1	1	45.2	0.000170627	0	7.83351	0	2	464.225	927.443	0.267863	70.6961	7095	7095	MS2	6/54	170306_chiba_GST_02.raw
	High	LFCVGFTK	Unambiguous	2	2	NP_001080325.1;NP_001104210.1		CID	1	0	1	1	44.12	0.000212992	0	5.13739	0	2	457.744	914.481	0.505527	77.4875	8107	8107	MS2	7/56	170306_chiba_GST_02.raw
	High	WQTMIEAHVDVK	Unambiguous	2	2	NP_001080325.1;NP_001104210.1		CID	1	0	1	1	43.67	0.00070444	0	41.1928	2	2	728.866	1456.73	-0.0782403	62.7376	5875	5875	MS2	8/122	170306_chiba_GST_02.raw
	High	VFEVSLADLQNDEVAFR	Unambiguous	2	2	NP_001080325.1;NP_001104210.1		CID	1	0	1	1	43.3	0.000696925	0	52.6101	9	2	976.492	1951.98	0.395978	122.596	14308	14308	MS2	21/162	170306_chiba_GST_02.raw
	High	ACQSIYPLHDVYVR	Unambiguous	1	1	NP_001080325.1		CID	1	0	1	1	42.1	0.000770744	0	5.88858	0	3	555.281	1663.83	0.741901	68.6206	6780	6780	MS2	7/138	170306_chiba_GST_02.raw
	High	IVDPFSK	Unambiguous	2	2	NP_001080325.1;NP_001104210.1		CID	1	0	1	1	41.17	0.000733282	0	6.24454	0	2	403.226	805.445	-0.592731	60.7983	5569	5569	MS2	6/54	170306_chiba_GST_02.raw
	High	EVQTNDLK	Unambiguous	2	2	NP_001080325.1;NP_001104210.1		CID	1	0	1	1	40.28	0.00220796	0	25.1033	0	2	473.746	946.484	0.273886	43.5731	2809	2809	MS2	7/76	170306_chiba_GST_02.raw
	High	KWQTMIEAHVDVK	Unambiguous	2	2	NP_001080325.1;NP_001104210.1		CID	1	0	1	1	34.16	0.00514168	1	40.7387	0	3	528.945	1584.82	0.189629	55.2293	4699	4699	MS2	9/134	170306_chiba_GST_02.raw
	High	IVDPFSK	Unambiguous	2	2	NP_001080325.1;NP_001104210.1		CID	1	0	1	1	33.16	0.00381616	0	5.48524	0	2	403.226	805.445	-0.138062	60.0325	5451	5451	MS2	5/54	170306_chiba_GST_02.raw
	High	KIVDPFSK	Unambiguous	2	2	NP_001080325.1;NP_001104210.1		CID	1	0	1	1	31.91	0.00444477	1	17.4598	0	2	467.274	933.541	0.208537	51.2617	4071	4071	MS2	5/76	170306_chiba_GST_02.raw
	High	MFEIMTR	Unambiguous	1	1	NP_001080325.1		CID	1	0	1	1	31.39	0.0041025	0	30.3604	0	2	464.225	927.443	0.136243	69.8619	6970	6970	MS2	6/54	170306_chiba_GST_02.raw
	High	VFEVSLADLQNDEVAFR	Unambiguous	2	2	NP_001080325.1;NP_001104210.1		CID	1	0	1	1	31.13	0.0114094	0	49.1547	85	3	651.33	1951.98	0.17021	146.351	17278	17278	MS2	16/162	170306_chiba_GST_02.raw
	High	DWYDVK	Unambiguous	2	2	NP_001080325.1;NP_001104210.1		CID	1	0	1	1	29.41	0.00458205	0	15.197	0	2	413.193	825.378	0.249566	60.6913	5554	5554	MS2	4/46	170306_chiba_GST_02.raw
OCT98942.1	hypothetical protein XELAEV_18011173mg [Xenopus laevis]	3683.27	56.4	7	4	34	70	805	89.1236	5.30029
	Confidence Level	Sequence	PSM Ambiguity	# Proteins	# Protein Groups	Protein Group Accessions	Modifications	Activation Type	ΔScore	ΔCn	Rank	Search Engine Rank	IonScore	Exp Value	# Missed Cleavages	Isolation Interference [%]	Ion Inject Time [ms]	Charge	m/z [Da]	MH+ [Da]	ΔM [ppm]	RT [min]	First Scan	Last Scan	MS Order	Ions Matched	Spectrum File
	High	LIVDESINEDNSVVSLSQAK	Unambiguous	3	2	OCT98942.1;XP_018122930.1		CID	1	0	1	1	118.44	2.08383e-11	0	0.324897	0	2	1080.56	2160.1	0.539023	76.0432	7893	7893	MS2	16/202	170306_chiba_GST_02.raw
	High	KYEMFAQTLQQSR	Unambiguous	5	2	OCT98942.1;XP_018122930.1		CID	1	0	1	1	107.4	2.76595e-10	1	7.56527	1	2	815.406	1629.81	-0.0404034	56.3271	4874	4874	MS2	10/138	170306_chiba_GST_02.raw
	High	EDEEESLNEVGYDDIGGCR	Unambiguous	5	2	OCT98942.1;XP_018122930.1		CID	1	0	1	1	105.2	3.0128e-11	0	15.1776	2	2	1064.93	2128.86	-0.400279	70.6487	7089	7089	MS2	12/192	170306_chiba_GST_02.raw
	High	LSDDVDLEQVANETHGHVGADLAALCSEAALQAIR	Unambiguous	5	2	OCT98942.1;XP_018122930.1		CID	1	0	1	1	105.13	3.39127e-10	0	6.34694	0	3	1211.26	3631.77	0.196428	105.038	11969	11969	MS2	47/376	170306_chiba_GST_02.raw
	High	AIANECQANFISIK	Unambiguous	5	2	OCT98942.1;XP_018122930.1		CID	1	0	1	1	103.42	9.69125e-10	0	29.1133	0	2	761.39	1521.77	0.358706	74.2391	7628	7628	MS2	11/138	170306_chiba_GST_02.raw
	High	MTNGFSGADLTEICQR	Unambiguous	5	2	OCT98942.1;XP_018122930.1		CID	1	0	1	1	98.9	7.66508e-10	0	9.51214	0	2	871.896	1742.78	0.570505	79.2535	8365	8365	MS2	13/166	170306_chiba_GST_02.raw
	High	ETVVEVPQVTWEDIGGLEDVKR	Unambiguous	5	2	OCT98942.1;XP_018122930.1		CID	1	0	1	1	96.72	2.91555e-09	1	9.55368	0	2	1249.64	2498.28	0.66407	88.4934	9689	9689	MS2	14/232	170306_chiba_GST_02.raw
	High	VINQILTEMDGMSIK	Unambiguous	3	1	OCT98942.1		CID	1	0	1	1	95.11	5.48807e-09	0	22.4554	0	2	846.439	1691.87	0.0862407	88.6168	9706	9706	MS2	12/148	170306_chiba_GST_02.raw
	High	QTNPSAMEVEEDDPVPEIR	Unambiguous	5	2	OCT98942.1;XP_018122930.1		CID	1	0	1	1	93.99	3.13235e-09	0	2.8851	1	2	1078.5	2155.98	1.21198	71.9081	7277	7277	MS2	14/210	170306_chiba_GST_02.raw
	High	AVANETGAFFFLINGPEIMSK	Unambiguous	5	2	OCT98942.1;XP_018122930.1		CID	1	0	1	1	93.3	6.92248e-09	0	22.5848	1	2	1128.57	2256.14	0.0945554	113.784	13147	13147	MS2	11/224	170306_chiba_GST_02.raw
	High	IVSQLLTLMDGLK	Unambiguous	5	2	OCT98942.1;XP_018122930.1		CID	1	0	1	1	92.1	4.13119e-09	0	18.8998	1	2	715.919	1430.83	0.676679	105.962	12096	12096	MS2	10/128	170306_chiba_GST_02.raw
	High	IVSQLLTLMDGLK	Unambiguous	5	2	OCT98942.1;XP_018122930.1		CID	1	0	1	1	89.75	9.21551e-09	0	13.7781	1	2	715.918	1430.83	0.164793	106.723	12201	12201	MS2	10/128	170306_chiba_GST_02.raw
	High	KMDLIDLEDETIDAEVMNSLAVTMDDFR	Unambiguous	5	2	OCT98942.1;XP_018122930.1		CID	1	0	1	1	88.5	1.09472e-08	1	31.8082	10	3	1077.17	3229.5	0.0343939	132.384	15574	15574	MS2	11/316	170306_chiba_GST_02.raw
	High	QAAPCVLFFDELDSIAK	Unambiguous	5	2	OCT98942.1;XP_018122930.1		CID	1	0	1	1	88.03	2.28228e-08	0	6.28439	1	2	933.97	1866.93	0.719434	122.529	14299	14299	MS2	13/168	170306_chiba_GST_02.raw
	High	QAAPCVLFFDELDSIAK	Unambiguous	5	2	OCT98942.1;XP_018122930.1		CID	1	0	1	1	84.56	5.16169e-08	0	27.747	9	2	933.97	1866.93	0.850205	124.366	14540	14540	MS2	12/168	170306_chiba_GST_02.raw
	High	LSDDVDLEQVANETHGHVGADLAALCSEAALQAIR	Unambiguous	5	2	OCT98942.1;XP_018122930.1		CID	1	0	1	1	83.72	4.90436e-08	0	11.2665	1	3	1211.26	3631.77	0.80144	105.496	12033	12033	MS2	27/376	170306_chiba_GST_02.raw
	High	YEMFAQTLQQSR	Unambiguous	5	2	OCT98942.1;XP_018122930.1		CID	1	0	1	1	83.46	4.44054e-08	0	15.5059	1	2	751.359	1501.71	0.687269	69.4063	6901	6901	MS2	17/118	170306_chiba_GST_02.raw
	High	AVANETGAFFFLINGPEIMSK	Unambiguous	5	2	OCT98942.1;XP_018122930.1		CID	1	0	1	1	83.44	8.10687e-08	0	25.679	3	2	1128.57	2256.14	0.527402	113.052	13051	13051	MS2	13/224	170306_chiba_GST_02.raw
	High	NAPAIIFIDELDAIAPK	Unambiguous	5	2	OCT98942.1;XP_018122930.1		CID	1	0	1	1	83.26	5.87718e-08	0	11.0735	2	2	906.002	1811	0.680354	119.216	13863	13863	MS2	13/166	170306_chiba_GST_02.raw
	High	NAPAIIFIDELDAIAPK	Unambiguous	5	2	OCT98942.1;XP_018122930.1		CID	1	0	1	1	82.98	5.31193e-08	0	2.30028	0	2	906.002	1811	0.949974	119.968	13962	13962	MS2	21/166	170306_chiba_GST_02.raw
	High	QAAPCVLFFDELDSIAK	Unambiguous	5	2	OCT98942.1;XP_018122930.1		CID	1	0	1	1	81.43	1.02521e-07	0	9.96743	1	3	622.982	1866.93	0.483383	122.543	14301	14301	MS2	10/168	170306_chiba_GST_02.raw
	High	QAAPCVLFFDELDSIAK	Unambiguous	5	2	OCT98942.1;XP_018122930.1		CID	1	0	1	1	78.55	1.98982e-07	0	5.83725	1	2	933.969	1866.93	0.457892	123.346	14405	14405	MS2	12/168	170306_chiba_GST_02.raw
	High	WALSQSNPSALR	Unambiguous	4	2	OCT98942.1;XP_018122930.1		CID	1	0	1	1	77.19	3.18945e-07	0	4.87358	0	2	665.349	1329.69	-0.600256	62.5366	5843	5843	MS2	10/112	170306_chiba_GST_02.raw
	High	QAAPCVLFFDELDSIAK	Unambiguous	5	2	OCT98942.1;XP_018122930.1		CID	1	0	1	1	76.87	2.98104e-07	0	17.3948	4	2	933.97	1866.93	0.654049	123.977	14489	14489	MS2	13/168	170306_chiba_GST_02.raw
	High	NAPAIIFIDELDAIAPK	Unambiguous	5	2	OCT98942.1;XP_018122930.1		CID	1	0	1	1	76.44	2.39471e-07	0	5.46858	1	2	906.002	1811	1.01738	121.564	14172	14172	MS2	22/166	170306_chiba_GST_02.raw
	High	NAPAIIFIDELDAIAPK	Unambiguous	5	2	OCT98942.1;XP_018122930.1		CID	1	0	1	1	75.51	3.03685e-07	0	49.7483	26	2	906.002	1811	1.15219	138.001	16280	16280	MS2	22/166	170306_chiba_GST_02.raw
	High	NAPAIIFIDELDAIAPK	Unambiguous	5	2	OCT98942.1;XP_018122930.1		CID	1	0	1	1	75.34	3.64057e-07	0	57.5961	16	2	906.002	1811	0.612949	141.861	16764	16764	MS2	19/166	170306_chiba_GST_02.raw
	High	LGDVISIQPCPDVK	Unambiguous	5	2	OCT98942.1;XP_018122930.1		CID	1	0	1	1	75.23	5.50346e-07	0	13.636	0	2	742.395	1483.78	0.540169	74.8016	7711	7711	MS2	18/134	170306_chiba_GST_02.raw
	High	LDQLIYIPLPDEK	Unambiguous	5	2	OCT98942.1;XP_018122930.1		CID	1	0	1	1	74.05	3.9355e-07	0	34.679	2	2	778.932	1556.86	-0.0771474	90.3808	9955	9955	MS2	10/136	170306_chiba_GST_02.raw
	High	GPELLTmWFGESEANVR	Unambiguous	5	2	OCT98942.1;XP_018122930.1	M7(Oxidation)	CID	1	0	1	1	74.05	4.48647e-07	0	11.2578	0	2	976.465	1951.92	0.738319	103.152	11715	11715	MS2	21/152	170306_chiba_GST_02.raw
	High	ELQELVQYPVEHPDK	Unambiguous	5	2	OCT98942.1;XP_018122930.1		CID	1	0	1	1	72.96	9.15543e-07	0	0	1	2	912.462	1823.92	-0.370441	62.9524	5909	5909	MS2	21/162	170306_chiba_GST_02.raw
	High	VINQILTEMDGMSIK	Unambiguous	3	1	OCT98942.1		CID	1	0	1	1	71.95	1.15845e-06	0	14.0405	0	3	564.629	1691.87	0.727652	88.7397	9724	9724	MS2	16/148	170306_chiba_GST_02.raw
	High	LIVDESINEDNSVVSLSQAK	Unambiguous	3	2	OCT98942.1;XP_018122930.1		CID	1	0	1	1	71.86	8.47117e-07	0	12.153	0	3	720.706	2160.1	0.561054	76.0623	7896	7896	MS2	19/202	170306_chiba_GST_02.raw
	High	LDQLIYIPLPDEK	Unambiguous	5	2	OCT98942.1;XP_018122930.1		CID	1	0	1	1	71.23	6.96854e-07	0	8.73732	0	2	778.932	1556.86	-0.233964	91.1428	10059	10059	MS2	9/136	170306_chiba_GST_02.raw
	High	MDELQLFR	Unambiguous	5	2	OCT98942.1;XP_018122930.1		CID	1	0	1	1	68.86	1.65122e-06	0	5.00984	0	2	526.266	1051.52	0.179065	80.7796	8586	8586	MS2	7/64	170306_chiba_GST_02.raw
	High	NAPAIIFIDELDAIAPK	Unambiguous	5	2	OCT98942.1;XP_018122930.1		CID	1	0	1	1	66.89	2.54782e-06	0	3.5358	0	2	906.001	1811	0.343329	120.761	14067	14067	MS2	13/166	170306_chiba_GST_02.raw
	High	WALSQSNPSALR	Unambiguous	4	2	OCT98942.1;XP_018122930.1		CID	1	0	1	1	66.54	3.70439e-06	0	12.8137	1	2	665.349	1329.69	-0.600256	63.3505	5971	5971	MS2	9/112	170306_chiba_GST_02.raw
	High	LAGESESNLR	Unambiguous	5	2	OCT98942.1;XP_018122930.1		CID	1	0	1	1	65.9	4.92231e-06	0	15.8495	0	2	538.273	1075.54	0.348018	44.4452	2956	2956	MS2	9/82	170306_chiba_GST_02.raw
	High	NAPAIIFIDELDAIAPK	Unambiguous	5	2	OCT98942.1;XP_018122930.1		CID	1	0	1	1	65.3	2.64133e-06	0	19.4478	7	2	906.002	1811	0.882569	122.416	14284	14284	MS2	12/166	170306_chiba_GST_02.raw
	High	GGNIGDGGGAADR	Unambiguous	5	2	OCT98942.1;XP_018122930.1		CID	1	0	1	1	64.19	1.35278e-06	0	27.2866	0	2	558.755	1116.5	0.159477	42.6135	2649	2649	MS2	10/128	170306_chiba_GST_02.raw
	High	QAAPCVLFFDELDSIAK	Unambiguous	5	2	OCT98942.1;XP_018122930.1		CID	1	0	1	1	63.65	6.21387e-06	0	22.8824	2	3	622.982	1866.93	-0.105087	123.354	14406	14406	MS2	9/168	170306_chiba_GST_02.raw
	High	ETVVEVPQVTWEDIGGLEDVK	Unambiguous	5	2	OCT98942.1;XP_018122930.1		CID	1	0	1	1	62.83	7.14037e-06	0	21.8934	1	2	1171.59	2342.18	1.45753	96.8935	10860	10860	MS2	8/222	170306_chiba_GST_02.raw
	High	NAPAIIFIDELDAIAPK	Unambiguous	5	2	OCT98942.1;XP_018122930.1		CID	1	0	1	1	62.59	4.92973e-06	0	45.3239	11	2	906.002	1811	0.882569	122.635	14313	14313	MS2	23/166	170306_chiba_GST_02.raw
	High	SDDLSTAILK	Unambiguous	4	2	OCT98942.1;XP_018122930.1		CID	1	0	1	1	60.45	1.57324e-05	0	9.03504	0	2	531.787	1062.57	-0.100462	63.8228	6046	6046	MS2	12/82	170306_chiba_GST_02.raw
	High	AVANETGAFFFLINGPEIMSK	Unambiguous	5	2	OCT98942.1;XP_018122930.1		CID	1	0	1	1	58.75	1.98028e-05	0	35.8497	1	3	752.717	2256.14	0.0344896	113.769	13145	13145	MS2	23/224	170306_chiba_GST_02.raw
	High	AVANETGAFFFLINGPEIMSK	Unambiguous	5	2	OCT98942.1;XP_018122930.1		CID	1	0	1	1	57.3	2.89555e-05	0	23.3031	3	3	752.717	2256.14	-0.0466692	113.008	13045	13045	MS2	22/224	170306_chiba_GST_02.raw
	High	qAAPCVLFFDELDSIAK	Unambiguous	5	2	OCT98942.1;XP_018122930.1	N-Term(Gln->pyro-Glu)	CID	1	0	1	1	56.79	2.9527e-05	0	20.2918	5	2	925.456	1849.91	0.494401	140.308	16569	16569	MS2	13/168	170306_chiba_GST_02.raw
	High	NAPAIIFIDELDAIAPK	Unambiguous	5	2	OCT98942.1;XP_018122930.1		CID	1	0	1	1	56.14	3.04026e-05	0	36.8703	28	2	906.001	1811	0.0737088	140.71	16620	16620	MS2	18/166	170306_chiba_GST_02.raw
	High	NAPAIIFIDELDAIAPK	Unambiguous	5	2	OCT98942.1;XP_018122930.1		CID	1	0	1	1	55.37	3.61551e-05	0	14.7171	1	3	604.337	1811	0.538119	121.241	14130	14130	MS2	18/166	170306_chiba_GST_02.raw
	High	ETVVEVPQVTWEDIGGLEDVK	Unambiguous	5	2	OCT98942.1;XP_018122930.1		CID	1	0	1	1	53.31	6.27657e-05	0	12.4715	0	2	1171.59	2342.18	0.727876	96.5662	10815	10815	MS2	11/222	170306_chiba_GST_02.raw
	High	DVDVDFLAK	Unambiguous	3	1	OCT98942.1		CID	1	0	1	1	52.76	8.15682e-05	0	6.68142	0	2	511.264	1021.52	0.434755	76.3871	7945	7945	MS2	7/72	170306_chiba_GST_02.raw
	High	NAPAIIFIDELDAIAPK	Unambiguous	5	2	OCT98942.1;XP_018122930.1		CID	1	0	1	1	52.27	6.40359e-05	0	14.1688	0	3	604.337	1811	1.04366	119.648	13920	13920	MS2	20/166	170306_chiba_GST_02.raw
	High	GILLYGPPGTGK	Unambiguous	9	2	OCT98942.1;XP_018122930.1		CID	1	0	1	1	52.17	5.15726e-05	0	30.2656	0	2	586.837	1172.67	0.178088	70.2707	7032	7032	MS2	10/88	170306_chiba_GST_02.raw
	High	NAPAIIFIDELDAIAPK	Unambiguous	5	2	OCT98942.1;XP_018122930.1		CID	1	0	1	1	50.65	0.000107194	0	6.65641	0	3	604.337	1811	0.437012	120.445	14025	14025	MS2	17/166	170306_chiba_GST_02.raw
	High	SDDLSTAILK	Unambiguous	4	2	OCT98942.1;XP_018122930.1		CID	1	0	1	1	50.19	0.00016703	0	7.47518	0	2	531.788	1062.57	0.01442	63.2974	5962	5962	MS2	8/82	170306_chiba_GST_02.raw
	High	LEILQIHTK	Unambiguous	5	2	OCT98942.1;XP_018122930.1		CID	1	0	1	1	46.98	0.000115257	0	30.1059	0	2	547.832	1094.66	-0.403443	58.9447	5282	5282	MS2	7/84	170306_chiba_GST_02.raw
	High	GPELLTmWFGESEANVR	Unambiguous	5	2	OCT98942.1;XP_018122930.1	M7(Oxidation)	CID	1	0	1	1	46.86	0.000215336	0	18.6551	0	3	651.313	1951.92	0.606354	103.166	11717	11717	MS2	10/152	170306_chiba_GST_02.raw
	High	AVANETGAFFFLINGPEIMSK	Unambiguous	5	2	OCT98942.1;XP_018122930.1		CID	1	0	1	1	44.06	0.000681239	0	44.8792	1	3	752.718	2256.14	0.602601	114.235	13207	13207	MS2	32/224	170306_chiba_GST_02.raw
	High	KGDIFLVR	Unambiguous	3	1	OCT98942.1		CID	1	0	1	1	42.86	0.000354561	1	28.6897	0	2	474.287	947.567	-0.153054	54.7011	4617	4617	MS2	7/70	170306_chiba_GST_02.raw
	High	IVSQLLTLMDGLK	Unambiguous	5	2	OCT98942.1;XP_018122930.1		CID	1	0	1	1	42.47	0.000396368	0	7.94626	1	3	477.614	1430.83	-0.463134	106.18	12126	12126	MS2	12/128	170306_chiba_GST_02.raw
	High	GPELLTmWFGESEANVR	Unambiguous	5	2	OCT98942.1;XP_018122930.1	M7(Oxidation)	CID	1	0	1	1	41.88	0.000719984	0	46.6943	1	2	976.465	1951.92	0.675781	104.418	11885	11885	MS2	16/152	170306_chiba_GST_02.raw
	High	QTNPSAMEVEEDDPVPEIR	Unambiguous	5	2	OCT98942.1;XP_018122930.1		CID	1	0	1	1	41.25	0.000502429	0	12.513	0	3	719.332	2155.98	0.1866	72.0296	7296	7296	MS2	15/210	170306_chiba_GST_02.raw
	High	KYEMFAQTLQQSR	Unambiguous	5	2	OCT98942.1;XP_018122930.1		CID	1	0	1	1	37.6	0.0025285	1	16.203	0	3	543.94	1629.81	0.138593	56.4236	4888	4888	MS2	9/138	170306_chiba_GST_02.raw
	High	GVLFYGPPGCGK	Unambiguous	5	2	OCT98942.1;XP_018122930.1		CID	1	0	1	1	36.35	0.00422925	0	40.1044	0	2	597.803	1194.6	0.6571	72.9747	7440	7440	MS2	6/90	170306_chiba_GST_02.raw
	High	AVANETGAFFFLINGPEIMSK	Unambiguous	5	2	OCT98942.1;XP_018122930.1		CID	1	0	1	1	36.25	0.00372306	0	51.9562	4	3	752.719	2256.14	1.81998	114.945	13302	13302	MS2	12/224	170306_chiba_GST_02.raw
	High	KAFEEAEK	Unambiguous	5	2	OCT98942.1;XP_018122930.1		CID	1	0	1	1	32.75	0.0109893	1	36.3351	0	2	476.243	951.478	-0.49558	42.2714	2591	2591	MS2	6/76	170306_chiba_GST_02.raw
	High	FGMTPSK	Unambiguous	5	2	OCT98942.1;XP_018122930.1		CID	1	0	1	1	32.31	0.0042593	0	31.7468	0	2	384.192	767.376	0.367259	46.3845	3280	3280	MS2	6/52	170306_chiba_GST_02.raw
	High	SDDLSTAILK	Unambiguous	4	2	OCT98942.1;XP_018122930.1		CID	1	0	1	1	31.91	0.0112408	0	45.0765	1	2	531.788	1062.57	0.244185	64.2635	6115	6115	MS2	8/82	170306_chiba_GST_02.raw
	High	EMVELPLR	Unambiguous	5	2	OCT98942.1;XP_018122930.1		CID	1	0	1	1	31.44	0.00344541	0	24.1888	0	2	493.771	986.534	0.362944	72.7821	7410	7410	MS2	6/62	170306_chiba_GST_02.raw
	High	GDIFLVR	Unambiguous	3	1	OCT98942.1		CID	1	0	1	1	29.11	0.0118448	0	34.605	1	2	410.24	819.472	-0.252318	71.7813	7258	7258	MS2	5/48	170306_chiba_GST_02.raw
XP_018122930.1	PREDICTED: transitional endoplasmic reticulum ATPase-like [Xenopus laevis]	3592.52	54.29	6	1	31	67	805	89.1445	5.23682
	Confidence Level	Sequence	PSM Ambiguity	# Proteins	# Protein Groups	Protein Group Accessions	Modifications	Activation Type	ΔScore	ΔCn	Rank	Search Engine Rank	IonScore	Exp Value	# Missed Cleavages	Isolation Interference [%]	Ion Inject Time [ms]	Charge	m/z [Da]	MH+ [Da]	ΔM [ppm]	RT [min]	First Scan	Last Scan	MS Order	Ions Matched	Spectrum File
	High	LIVDESINEDNSVVSLSQAK	Unambiguous	3	2	OCT98942.1;XP_018122930.1		CID	1	0	1	1	118.44	2.08383e-11	0	0.324897	0	2	1080.56	2160.1	0.539023	76.0432	7893	7893	MS2	16/202	170306_chiba_GST_02.raw
	High	KYEMFAQTLQQSR	Unambiguous	5	2	OCT98942.1;XP_018122930.1		CID	1	0	1	1	107.4	2.76595e-10	1	7.56527	1	2	815.406	1629.81	-0.0404034	56.3271	4874	4874	MS2	10/138	170306_chiba_GST_02.raw
	High	EDEEESLNEVGYDDIGGCR	Unambiguous	5	2	OCT98942.1;XP_018122930.1		CID	1	0	1	1	105.2	3.0128e-11	0	15.1776	2	2	1064.93	2128.86	-0.400279	70.6487	7089	7089	MS2	12/192	170306_chiba_GST_02.raw
	High	LSDDVDLEQVANETHGHVGADLAALCSEAALQAIR	Unambiguous	5	2	OCT98942.1;XP_018122930.1		CID	1	0	1	1	105.13	3.39127e-10	0	6.34694	0	3	1211.26	3631.77	0.196428	105.038	11969	11969	MS2	47/376	170306_chiba_GST_02.raw
	High	AIANECQANFISIK	Unambiguous	5	2	OCT98942.1;XP_018122930.1		CID	1	0	1	1	103.42	9.69125e-10	0	29.1133	0	2	761.39	1521.77	0.358706	74.2391	7628	7628	MS2	11/138	170306_chiba_GST_02.raw
	High	MTNGFSGADLTEICQR	Unambiguous	5	2	OCT98942.1;XP_018122930.1		CID	1	0	1	1	98.9	7.66508e-10	0	9.51214	0	2	871.896	1742.78	0.570505	79.2535	8365	8365	MS2	13/166	170306_chiba_GST_02.raw
	High	ETVVEVPQVTWEDIGGLEDVKR	Unambiguous	5	2	OCT98942.1;XP_018122930.1		CID	1	0	1	1	96.72	2.91555e-09	1	9.55368	0	2	1249.64	2498.28	0.66407	88.4934	9689	9689	MS2	14/232	170306_chiba_GST_02.raw
	High	QTNPSAMEVEEDDPVPEIR	Unambiguous	5	2	OCT98942.1;XP_018122930.1		CID	1	0	1	1	93.99	3.13235e-09	0	2.8851	1	2	1078.5	2155.98	1.21198	71.9081	7277	7277	MS2	14/210	170306_chiba_GST_02.raw
	High	AVANETGAFFFLINGPEIMSK	Unambiguous	5	2	OCT98942.1;XP_018122930.1		CID	1	0	1	1	93.3	6.92248e-09	0	22.5848	1	2	1128.57	2256.14	0.0945554	113.784	13147	13147	MS2	11/224	170306_chiba_GST_02.raw
	High	IVSQLLTLMDGLK	Unambiguous	5	2	OCT98942.1;XP_018122930.1		CID	1	0	1	1	92.1	4.13119e-09	0	18.8998	1	2	715.919	1430.83	0.676679	105.962	12096	12096	MS2	10/128	170306_chiba_GST_02.raw
	High	IVSQLLTLMDGLK	Unambiguous	5	2	OCT98942.1;XP_018122930.1		CID	1	0	1	1	89.75	9.21551e-09	0	13.7781	1	2	715.918	1430.83	0.164793	106.723	12201	12201	MS2	10/128	170306_chiba_GST_02.raw
	High	VINQILTEMDGMSTK	Unambiguous	2	1	XP_018122930.1		CID	1	0	1	1	89.57	1.7058e-08	0	25.8436	0	2	840.421	1679.83	0.312629	83.2555	8947	8947	MS2	10/150	170306_chiba_GST_02.raw
	High	KMDLIDLEDETIDAEVMNSLAVTMDDFR	Unambiguous	5	2	OCT98942.1;XP_018122930.1		CID	1	0	1	1	88.5	1.09472e-08	1	31.8082	10	3	1077.17	3229.5	0.0343939	132.384	15574	15574	MS2	11/316	170306_chiba_GST_02.raw
	High	QAAPCVLFFDELDSIAK	Unambiguous	5	2	OCT98942.1;XP_018122930.1		CID	1	0	1	1	88.03	2.28228e-08	0	6.28439	1	2	933.97	1866.93	0.719434	122.529	14299	14299	MS2	13/168	170306_chiba_GST_02.raw
	High	QAAPCVLFFDELDSIAK	Unambiguous	5	2	OCT98942.1;XP_018122930.1		CID	1	0	1	1	84.56	5.16169e-08	0	27.747	9	2	933.97	1866.93	0.850205	124.366	14540	14540	MS2	12/168	170306_chiba_GST_02.raw
	High	LSDDVDLEQVANETHGHVGADLAALCSEAALQAIR	Unambiguous	5	2	OCT98942.1;XP_018122930.1		CID	1	0	1	1	83.72	4.90436e-08	0	11.2665	1	3	1211.26	3631.77	0.80144	105.496	12033	12033	MS2	27/376	170306_chiba_GST_02.raw
	High	YEMFAQTLQQSR	Unambiguous	5	2	OCT98942.1;XP_018122930.1		CID	1	0	1	1	83.46	4.44054e-08	0	15.5059	1	2	751.359	1501.71	0.687269	69.4063	6901	6901	MS2	17/118	170306_chiba_GST_02.raw
	High	AVANETGAFFFLINGPEIMSK	Unambiguous	5	2	OCT98942.1;XP_018122930.1		CID	1	0	1	1	83.44	8.10687e-08	0	25.679	3	2	1128.57	2256.14	0.527402	113.052	13051	13051	MS2	13/224	170306_chiba_GST_02.raw
	High	NAPAIIFIDELDAIAPK	Unambiguous	5	2	OCT98942.1;XP_018122930.1		CID	1	0	1	1	83.26	5.87718e-08	0	11.0735	2	2	906.002	1811	0.680354	119.216	13863	13863	MS2	13/166	170306_chiba_GST_02.raw
	High	NAPAIIFIDELDAIAPK	Unambiguous	5	2	OCT98942.1;XP_018122930.1		CID	1	0	1	1	82.98	5.31193e-08	0	2.30028	0	2	906.002	1811	0.949974	119.968	13962	13962	MS2	21/166	170306_chiba_GST_02.raw
	High	QAAPCVLFFDELDSIAK	Unambiguous	5	2	OCT98942.1;XP_018122930.1		CID	1	0	1	1	81.43	1.02521e-07	0	9.96743	1	3	622.982	1866.93	0.483383	122.543	14301	14301	MS2	10/168	170306_chiba_GST_02.raw
	High	QAAPCVLFFDELDSIAK	Unambiguous	5	2	OCT98942.1;XP_018122930.1		CID	1	0	1	1	78.55	1.98982e-07	0	5.83725	1	2	933.969	1866.93	0.457892	123.346	14405	14405	MS2	12/168	170306_chiba_GST_02.raw
	High	WALSQSNPSALR	Unambiguous	4	2	OCT98942.1;XP_018122930.1		CID	1	0	1	1	77.19	3.18945e-07	0	4.87358	0	2	665.349	1329.69	-0.600256	62.5366	5843	5843	MS2	10/112	170306_chiba_GST_02.raw
	High	QAAPCVLFFDELDSIAK	Unambiguous	5	2	OCT98942.1;XP_018122930.1		CID	1	0	1	1	76.87	2.98104e-07	0	17.3948	4	2	933.97	1866.93	0.654049	123.977	14489	14489	MS2	13/168	170306_chiba_GST_02.raw
	High	NAPAIIFIDELDAIAPK	Unambiguous	5	2	OCT98942.1;XP_018122930.1		CID	1	0	1	1	76.44	2.39471e-07	0	5.46858	1	2	906.002	1811	1.01738	121.564	14172	14172	MS2	22/166	170306_chiba_GST_02.raw
	High	NAPAIIFIDELDAIAPK	Unambiguous	5	2	OCT98942.1;XP_018122930.1		CID	1	0	1	1	75.51	3.03685e-07	0	49.7483	26	2	906.002	1811	1.15219	138.001	16280	16280	MS2	22/166	170306_chiba_GST_02.raw
	High	NAPAIIFIDELDAIAPK	Unambiguous	5	2	OCT98942.1;XP_018122930.1		CID	1	0	1	1	75.34	3.64057e-07	0	57.5961	16	2	906.002	1811	0.612949	141.861	16764	16764	MS2	19/166	170306_chiba_GST_02.raw
	High	LGDVISIQPCPDVK	Unambiguous	5	2	OCT98942.1;XP_018122930.1		CID	1	0	1	1	75.23	5.50346e-07	0	13.636	0	2	742.395	1483.78	0.540169	74.8016	7711	7711	MS2	18/134	170306_chiba_GST_02.raw
	High	LDQLIYIPLPDEK	Unambiguous	5	2	OCT98942.1;XP_018122930.1		CID	1	0	1	1	74.05	3.9355e-07	0	34.679	2	2	778.932	1556.86	-0.0771474	90.3808	9955	9955	MS2	10/136	170306_chiba_GST_02.raw
	High	GPELLTmWFGESEANVR	Unambiguous	5	2	OCT98942.1;XP_018122930.1	M7(Oxidation)	CID	1	0	1	1	74.05	4.48647e-07	0	11.2578	0	2	976.465	1951.92	0.738319	103.152	11715	11715	MS2	21/152	170306_chiba_GST_02.raw
	High	ELQELVQYPVEHPDK	Unambiguous	5	2	OCT98942.1;XP_018122930.1		CID	1	0	1	1	72.96	9.15543e-07	0	0	1	2	912.462	1823.92	-0.370441	62.9524	5909	5909	MS2	21/162	170306_chiba_GST_02.raw
	High	LIVDESINEDNSVVSLSQAK	Unambiguous	3	2	OCT98942.1;XP_018122930.1		CID	1	0	1	1	71.86	8.47117e-07	0	12.153	0	3	720.706	2160.1	0.561054	76.0623	7896	7896	MS2	19/202	170306_chiba_GST_02.raw
	High	LDQLIYIPLPDEK	Unambiguous	5	2	OCT98942.1;XP_018122930.1		CID	1	0	1	1	71.23	6.96854e-07	0	8.73732	0	2	778.932	1556.86	-0.233964	91.1428	10059	10059	MS2	9/136	170306_chiba_GST_02.raw
	High	MDELQLFR	Unambiguous	5	2	OCT98942.1;XP_018122930.1		CID	1	0	1	1	68.86	1.65122e-06	0	5.00984	0	2	526.266	1051.52	0.179065	80.7796	8586	8586	MS2	7/64	170306_chiba_GST_02.raw
	High	NAPAIIFIDELDAIAPK	Unambiguous	5	2	OCT98942.1;XP_018122930.1		CID	1	0	1	1	66.89	2.54782e-06	0	3.5358	0	2	906.001	1811	0.343329	120.761	14067	14067	MS2	13/166	170306_chiba_GST_02.raw
	High	WALSQSNPSALR	Unambiguous	4	2	OCT98942.1;XP_018122930.1		CID	1	0	1	1	66.54	3.70439e-06	0	12.8137	1	2	665.349	1329.69	-0.600256	63.3505	5971	5971	MS2	9/112	170306_chiba_GST_02.raw
	High	LAGESESNLR	Unambiguous	5	2	OCT98942.1;XP_018122930.1		CID	1	0	1	1	65.9	4.92231e-06	0	15.8495	0	2	538.273	1075.54	0.348018	44.4452	2956	2956	MS2	9/82	170306_chiba_GST_02.raw
	High	NAPAIIFIDELDAIAPK	Unambiguous	5	2	OCT98942.1;XP_018122930.1		CID	1	0	1	1	65.3	2.64133e-06	0	19.4478	7	2	906.002	1811	0.882569	122.416	14284	14284	MS2	12/166	170306_chiba_GST_02.raw
	High	GGNIGDGGGAADR	Unambiguous	5	2	OCT98942.1;XP_018122930.1		CID	1	0	1	1	64.19	1.35278e-06	0	27.2866	0	2	558.755	1116.5	0.159477	42.6135	2649	2649	MS2	10/128	170306_chiba_GST_02.raw
	High	QAAPCVLFFDELDSIAK	Unambiguous	5	2	OCT98942.1;XP_018122930.1		CID	1	0	1	1	63.65	6.21387e-06	0	22.8824	2	3	622.982	1866.93	-0.105087	123.354	14406	14406	MS2	9/168	170306_chiba_GST_02.raw
	High	ETVVEVPQVTWEDIGGLEDVK	Unambiguous	5	2	OCT98942.1;XP_018122930.1		CID	1	0	1	1	62.83	7.14037e-06	0	21.8934	1	2	1171.59	2342.18	1.45753	96.8935	10860	10860	MS2	8/222	170306_chiba_GST_02.raw
	High	NAPAIIFIDELDAIAPK	Unambiguous	5	2	OCT98942.1;XP_018122930.1		CID	1	0	1	1	62.59	4.92973e-06	0	45.3239	11	2	906.002	1811	0.882569	122.635	14313	14313	MS2	23/166	170306_chiba_GST_02.raw
	High	VINQILTEMDGMSTK	Unambiguous	2	1	XP_018122930.1		CID	1	0	1	1	61.86	1.00677e-05	0	14.2933	0	3	560.617	1679.84	0.595297	83.1503	8932	8932	MS2	13/150	170306_chiba_GST_02.raw
	High	SDDLSTAILK	Unambiguous	4	2	OCT98942.1;XP_018122930.1		CID	1	0	1	1	60.45	1.57324e-05	0	9.03504	0	2	531.787	1062.57	-0.100462	63.8228	6046	6046	MS2	12/82	170306_chiba_GST_02.raw
	High	AVANETGAFFFLINGPEIMSK	Unambiguous	5	2	OCT98942.1;XP_018122930.1		CID	1	0	1	1	58.75	1.98028e-05	0	35.8497	1	3	752.717	2256.14	0.0344896	113.769	13145	13145	MS2	23/224	170306_chiba_GST_02.raw
	High	AVANETGAFFFLINGPEIMSK	Unambiguous	5	2	OCT98942.1;XP_018122930.1		CID	1	0	1	1	57.3	2.89555e-05	0	23.3031	3	3	752.717	2256.14	-0.0466692	113.008	13045	13045	MS2	22/224	170306_chiba_GST_02.raw
	High	qAAPCVLFFDELDSIAK	Unambiguous	5	2	OCT98942.1;XP_018122930.1	N-Term(Gln->pyro-Glu)	CID	1	0	1	1	56.79	2.9527e-05	0	20.2918	5	2	925.456	1849.91	0.494401	140.308	16569	16569	MS2	13/168	170306_chiba_GST_02.raw
	High	NAPAIIFIDELDAIAPK	Unambiguous	5	2	OCT98942.1;XP_018122930.1		CID	1	0	1	1	56.14	3.04026e-05	0	36.8703	28	2	906.001	1811	0.0737088	140.71	16620	16620	MS2	18/166	170306_chiba_GST_02.raw
	High	NAPAIIFIDELDAIAPK	Unambiguous	5	2	OCT98942.1;XP_018122930.1		CID	1	0	1	1	55.37	3.61551e-05	0	14.7171	1	3	604.337	1811	0.538119	121.241	14130	14130	MS2	18/166	170306_chiba_GST_02.raw
	High	ETVVEVPQVTWEDIGGLEDVK	Unambiguous	5	2	OCT98942.1;XP_018122930.1		CID	1	0	1	1	53.31	6.27657e-05	0	12.4715	0	2	1171.59	2342.18	0.727876	96.5662	10815	10815	MS2	11/222	170306_chiba_GST_02.raw
	High	NAPAIIFIDELDAIAPK	Unambiguous	5	2	OCT98942.1;XP_018122930.1		CID	1	0	1	1	52.27	6.40359e-05	0	14.1688	0	3	604.337	1811	1.04366	119.648	13920	13920	MS2	20/166	170306_chiba_GST_02.raw
	High	GILLYGPPGTGK	Unambiguous	9	2	OCT98942.1;XP_018122930.1		CID	1	0	1	1	52.17	5.15726e-05	0	30.2656	0	2	586.837	1172.67	0.178088	70.2707	7032	7032	MS2	10/88	170306_chiba_GST_02.raw
	High	NAPAIIFIDELDAIAPK	Unambiguous	5	2	OCT98942.1;XP_018122930.1		CID	1	0	1	1	50.65	0.000107194	0	6.65641	0	3	604.337	1811	0.437012	120.445	14025	14025	MS2	17/166	170306_chiba_GST_02.raw
	High	SDDLSTAILK	Unambiguous	4	2	OCT98942.1;XP_018122930.1		CID	1	0	1	1	50.19	0.00016703	0	7.47518	0	2	531.788	1062.57	0.01442	63.2974	5962	5962	MS2	8/82	170306_chiba_GST_02.raw
	High	LEILQIHTK	Unambiguous	5	2	OCT98942.1;XP_018122930.1		CID	1	0	1	1	46.98	0.000115257	0	30.1059	0	2	547.832	1094.66	-0.403443	58.9447	5282	5282	MS2	7/84	170306_chiba_GST_02.raw
	High	GPELLTmWFGESEANVR	Unambiguous	5	2	OCT98942.1;XP_018122930.1	M7(Oxidation)	CID	1	0	1	1	46.86	0.000215336	0	18.6551	0	3	651.313	1951.92	0.606354	103.166	11717	11717	MS2	10/152	170306_chiba_GST_02.raw
	High	AVANETGAFFFLINGPEIMSK	Unambiguous	5	2	OCT98942.1;XP_018122930.1		CID	1	0	1	1	44.06	0.000681239	0	44.8792	1	3	752.718	2256.14	0.602601	114.235	13207	13207	MS2	32/224	170306_chiba_GST_02.raw
	High	IVSQLLTLMDGLK	Unambiguous	5	2	OCT98942.1;XP_018122930.1		CID	1	0	1	1	42.47	0.000396368	0	7.94626	1	3	477.614	1430.83	-0.463134	106.18	12126	12126	MS2	12/128	170306_chiba_GST_02.raw
	High	GPELLTmWFGESEANVR	Unambiguous	5	2	OCT98942.1;XP_018122930.1	M7(Oxidation)	CID	1	0	1	1	41.88	0.000719984	0	46.6943	1	2	976.465	1951.92	0.675781	104.418	11885	11885	MS2	16/152	170306_chiba_GST_02.raw
	High	QTNPSAMEVEEDDPVPEIR	Unambiguous	5	2	OCT98942.1;XP_018122930.1		CID	1	0	1	1	41.25	0.000502429	0	12.513	0	3	719.332	2155.98	0.1866	72.0296	7296	7296	MS2	15/210	170306_chiba_GST_02.raw
	High	KYEMFAQTLQQSR	Unambiguous	5	2	OCT98942.1;XP_018122930.1		CID	1	0	1	1	37.6	0.0025285	1	16.203	0	3	543.94	1629.81	0.138593	56.4236	4888	4888	MS2	9/138	170306_chiba_GST_02.raw
	High	GVLFYGPPGCGK	Unambiguous	5	2	OCT98942.1;XP_018122930.1		CID	1	0	1	1	36.35	0.00422925	0	40.1044	0	2	597.803	1194.6	0.6571	72.9747	7440	7440	MS2	6/90	170306_chiba_GST_02.raw
	High	AVANETGAFFFLINGPEIMSK	Unambiguous	5	2	OCT98942.1;XP_018122930.1		CID	1	0	1	1	36.25	0.00372306	0	51.9562	4	3	752.719	2256.14	1.81998	114.945	13302	13302	MS2	12/224	170306_chiba_GST_02.raw
	High	KAFEEAEK	Unambiguous	5	2	OCT98942.1;XP_018122930.1		CID	1	0	1	1	32.75	0.0109893	1	36.3351	0	2	476.243	951.478	-0.49558	42.2714	2591	2591	MS2	6/76	170306_chiba_GST_02.raw
	High	FGMTPSK	Unambiguous	5	2	OCT98942.1;XP_018122930.1		CID	1	0	1	1	32.31	0.0042593	0	31.7468	0	2	384.192	767.376	0.367259	46.3845	3280	3280	MS2	6/52	170306_chiba_GST_02.raw
	High	SDDLSTAILK	Unambiguous	4	2	OCT98942.1;XP_018122930.1		CID	1	0	1	1	31.91	0.0112408	0	45.0765	1	2	531.788	1062.57	0.244185	64.2635	6115	6115	MS2	8/82	170306_chiba_GST_02.raw
	High	EMVELPLR	Unambiguous	5	2	OCT98942.1;XP_018122930.1		CID	1	0	1	1	31.44	0.00344541	0	24.1888	0	2	493.771	986.534	0.362944	72.7821	7410	7410	MS2	6/62	170306_chiba_GST_02.raw
XP_018091381.1	PREDICTED: hyaluronan binding protein 4 S homeolog isoform X2 [Xenopus laevis]	3571.31	44.77	4	10	10	58	373	42.0198	6.7417
	Confidence Level	Sequence	PSM Ambiguity	# Proteins	# Protein Groups	Protein Group Accessions	Modifications	Activation Type	ΔScore	ΔCn	Rank	Search Engine Rank	IonScore	Exp Value	# Missed Cleavages	Isolation Interference [%]	Ion Inject Time [ms]	Charge	m/z [Da]	MH+ [Da]	ΔM [ppm]	RT [min]	First Scan	Last Scan	MS Order	Ions Matched	Spectrum File
	High	VSEETNDDGFSQEMSLDEWK	Unambiguous	4	1	XP_018091381.1		CID	1	0	1	1	134.85	4.58277e-14	0	1.87871	0	2	1173.49	2345.97	0.183347	80.6857	8573	8573	MS2	14/212	170306_chiba_GST_02.raw
	High	VSEETNDDGFSQEMSLDEWK	Unambiguous	4	1	XP_018091381.1		CID	1	0	1	1	109.16	1.51674e-11	0	14.6747	1	2	1173.49	2345.97	1.01589	80.4737	8542	8542	MS2	11/212	170306_chiba_GST_02.raw
	High	FQQLLDDESDPLDFLYQSAVEVTHR	Unambiguous	4	1	XP_018091381.1		CID	1	0	1	1	101.51	1.06654e-09	0	21.8975	11	3	989.144	2965.42	-0.898324	132.963	15647	15647	MS2	21/272	170306_chiba_GST_02.raw
	High	FQQLLDDESDPLDFLYQSAVEVTHR	Unambiguous	4	1	XP_018091381.1		CID	1	0	1	1	100.66	1.34865e-09	0	19.5487	10	3	989.147	2965.43	1.20107	139.475	16465	16465	MS2	20/272	170306_chiba_GST_02.raw
	High	REEAFPHDVINVLADAPNPDDPEDFPALA	Unambiguous	4	1	XP_018091381.1		CID	1	0	1	1	99.86	9.13994e-10	1	27.5667	1	3	1058.84	3174.5	0.480593	97.54	10950	10950	MS2	16/302	170306_chiba_GST_02.raw
	High	NNISENEEESQYCFR	Unambiguous	4	1	XP_018091381.1		CID	1	0	1	1	97.21	1.89657e-10	0	2.00874	0	2	931.387	1861.77	0.0673766	55.2471	4702	4702	MS2	10/152	170306_chiba_GST_02.raw
	High	FQQLLDDESDPLDFLYQSAVEVTHR	Unambiguous	4	1	XP_018091381.1		CID	1	0	1	1	95.26	4.45288e-09	0	6.69962	6	3	989.146	2965.42	0.830589	137.429	16209	16209	MS2	19/272	170306_chiba_GST_02.raw
	High	FQQLLDDESDPLDFLYQSAVEVTHR	Unambiguous	4	1	XP_018091381.1		CID	1	0	1	1	93.81	6.42582e-09	0	3.08285	0	3	989.146	2965.42	0.274868	119.016	13836	13836	MS2	26/272	170306_chiba_GST_02.raw
	High	FQQLLDDESDPLDFLYQSAVEVTHR	Unambiguous	4	1	XP_018091381.1		CID	1	0	1	1	90.6	1.25419e-08	0	23.6095	5	3	989.145	2965.42	-0.219107	131.44	15456	15456	MS2	22/272	170306_chiba_GST_02.raw
	High	FQQLLDDESDPLDFLYQSAVEVTHR	Unambiguous	4	1	XP_018091381.1		CID	1	0	1	1	89.59	1.6595e-08	0	13.9035	9	3	989.145	2965.42	-0.77483	133.295	15690	15690	MS2	21/272	170306_chiba_GST_02.raw
	High	FQQLLDDESDPLDFLYQSAVEVTHR	Unambiguous	4	1	XP_018091381.1		CID	1	0	1	1	88.99	2.00631e-08	0	4.34476	1	2	1483.22	2965.42	0.71163	119.201	13861	13861	MS2	19/272	170306_chiba_GST_02.raw
	High	FQQLLDDESDPLDFLYQSAVEVTHR	Unambiguous	4	1	XP_018091381.1		CID	1	0	1	1	88.73	2.00952e-08	0	10.2965	20	3	989.145	2965.42	-0.651336	132.636	15606	15606	MS2	22/272	170306_chiba_GST_02.raw
	High	FQQLLDDESDPLDFLYQSAVEVTHR	Unambiguous	4	1	XP_018091381.1		CID	1	0	1	1	88.45	2.12905e-08	0	21.3573	8	3	989.144	2965.42	-1.82453	140.991	16654	16654	MS2	18/272	170306_chiba_GST_02.raw
	High	FQQLLDDESDPLDFLYQSAVEVTHR	Unambiguous	4	1	XP_018091381.1		CID	1	0	1	1	87.94	2.48272e-08	0	31.7114	4	2	1483.22	2965.42	1.04095	120.021	13969	13969	MS2	26/272	170306_chiba_GST_02.raw
	High	FQQLLDDESDPLDFLYQSAVEVTHR	Unambiguous	4	1	XP_018091381.1		CID	1	0	1	1	86.99	3.19978e-08	0	19.586	11	3	989.146	2965.42	0.336614	138.817	16382	16382	MS2	20/272	170306_chiba_GST_02.raw
	High	FQQLLDDESDPLDFLYQSAVEVTHR	Unambiguous	4	1	XP_018091381.1		CID	1	0	1	1	86.22	3.47427e-08	0	26.5152	7	3	989.145	2965.42	-0.280854	123.243	14392	14392	MS2	18/272	170306_chiba_GST_02.raw
	High	REEAFPHDVINVLADAPNPDDPEDFPALA	Unambiguous	4	1	XP_018091381.1		CID	1	0	1	1	85.49	2.50002e-08	1	3.88775	0	3	1058.84	3174.5	0.480593	98.6864	11107	11107	MS2	13/302	170306_chiba_GST_02.raw
	High	FQQLLDDESDPLDFLYQSAVEVTHR	Unambiguous	4	1	XP_018091381.1		CID	1	0	1	1	84.4	5.60956e-08	0	14.5713	20	3	989.147	2965.43	1.6333	126.655	14841	14841	MS2	23/272	170306_chiba_GST_02.raw
	High	REEAFPHDVINVLADAPNPDDPEDFPALA	Unambiguous	4	1	XP_018091381.1		CID	1	0	1	1	84.05	3.56163e-08	1	2.96002	0	3	1058.84	3174.5	0.134513	99.4672	11214	11214	MS2	15/302	170306_chiba_GST_02.raw
	High	FQQLLDDESDPLDFLYQSAVEVTHR	Unambiguous	4	1	XP_018091381.1		CID	1	0	1	1	83.51	7.06365e-08	0	33.9238	11	3	989.147	2965.43	1.94203	135.942	16026	16026	MS2	18/272	170306_chiba_GST_02.raw
	High	FQQLLDDESDPLDFLYQSAVEVTHR	Unambiguous	4	1	XP_018091381.1		CID	1	0	1	1	83.33	7.33934e-08	0	40.6031	13	3	989.146	2965.42	0.151374	128.867	15126	15126	MS2	18/272	170306_chiba_GST_02.raw
	High	FQQLLDDESDPLDFLYQSAVEVTHR	Unambiguous	4	1	XP_018091381.1		CID	1	0	1	1	80.83	1.30101e-07	0	15.0234	8	3	989.145	2965.42	0.0896271	140.636	16611	16611	MS2	17/272	170306_chiba_GST_02.raw
	High	FQQLLDDESDPLDFLYQSAVEVTHR	Unambiguous	4	1	XP_018091381.1		CID	1	0	1	1	80.82	1.24191e-07	0	38.978	11	3	989.146	2965.42	0.954082	126.302	14795	14795	MS2	21/272	170306_chiba_GST_02.raw
	High	AVVVGGSTDVK	Unambiguous	4	1	XP_018091381.1		CID	1	0	1	1	79.63	2.99456e-07	0	11.9695	0	2	516.29	1031.57	0.431086	45.1156	3065	3065	MS2	10/84	170306_chiba_GST_02.raw
	High	FQQLLDDESDPLDFLYQSAVEVTHR	Unambiguous	4	1	XP_018091381.1		CID	1	0	1	1	78.18	2.18959e-07	0	22.4889	13	3	989.145	2965.42	-0.219107	136.653	16113	16113	MS2	17/272	170306_chiba_GST_02.raw
	High	REEAFPHDVINVLADAPNPDDPEDFPALA	Unambiguous	4	1	XP_018091381.1		CID	1	0	1	1	78.15	1.32439e-07	1	9.54707	1	3	1058.84	3174.5	-1.01909	99.7828	11258	11258	MS2	18/302	170306_chiba_GST_02.raw
	High	FQQLLDDESDPLDFLYQSAVEVTHR	Unambiguous	4	1	XP_018091381.1		CID	1	0	1	1	76.95	2.97709e-07	0	39.3793	13	3	989.145	2965.42	-0.0956135	143.71	17000	17000	MS2	24/272	170306_chiba_GST_02.raw
	High	FQQLLDDESDPLDFLYQSAVEVTHR	Unambiguous	4	1	XP_018091381.1		CID	1	0	1	1	76.62	3.42989e-07	0	37.8358	21	3	989.146	2965.42	0.583602	129.511	15210	15210	MS2	20/272	170306_chiba_GST_02.raw
	High	FQQLLDDESDPLDFLYQSAVEVTHR	Unambiguous	4	1	XP_018091381.1		CID	1	0	1	1	74.89	5.01105e-07	0	9.63786	5	3	989.146	2965.42	0.274868	141.809	16757	16757	MS2	16/272	170306_chiba_GST_02.raw
	High	FQQLLDDESDPLDFLYQSAVEVTHR	Unambiguous	4	1	XP_018091381.1		CID	1	0	1	1	74.77	4.95138e-07	0	30.2057	16	3	989.144	2965.42	-1.33055	144.266	17067	17067	MS2	18/272	170306_chiba_GST_02.raw
	High	FQQLLDDESDPLDFLYQSAVEVTHR	Unambiguous	4	1	XP_018091381.1		CID	1	0	1	1	74.17	5.76151e-07	0	0	7	3	989.145	2965.42	-0.404348	132.837	15631	15631	MS2	16/272	170306_chiba_GST_02.raw
	High	FQQLLDDESDPLDFLYQSAVEVTHR	Unambiguous	4	1	XP_018091381.1		CID	1	0	1	1	74.17	5.51268e-07	0	26.2766	30	3	989.145	2965.42	-0.219107	132.55	15595	15595	MS2	20/272	170306_chiba_GST_02.raw
	High	FQQLLDDESDPLDFLYQSAVEVTHR	Unambiguous	4	1	XP_018091381.1		CID	1	0	1	1	73.84	6.17506e-07	0	73.0653	8	3	989.146	2965.42	0.830589	137.642	16235	16235	MS2	19/272	170306_chiba_GST_02.raw
	High	FQQLLDDESDPLDFLYQSAVEVTHR	Unambiguous	4	1	XP_018091381.1		CID	1	0	1	1	73.57	6.59312e-07	0	30.4876	10	3	989.145	2965.42	-0.651336	128.557	15087	15087	MS2	24/272	170306_chiba_GST_02.raw
	High	FQQLLDDESDPLDFLYQSAVEVTHR	Unambiguous	4	1	XP_018091381.1		CID	1	0	1	1	73.17	7.25331e-07	0	28.4977	12	3	989.145	2965.42	-0.466095	135.835	16012	16012	MS2	25/272	170306_chiba_GST_02.raw
	High	FQQLLDDESDPLDFLYQSAVEVTHR	Unambiguous	4	1	XP_018091381.1		CID	1	0	1	1	73.08	7.4544e-07	0	1.63964	0	3	989.146	2965.42	0.768842	120.598	14046	14046	MS2	23/272	170306_chiba_GST_02.raw
	High	FQQLLDDESDPLDFLYQSAVEVTHR	Unambiguous	4	1	XP_018091381.1		CID	1	0	1	1	72.69	8.07405e-07	0	2.44782	0	3	989.146	2965.42	0.954082	119.807	13941	13941	MS2	19/272	170306_chiba_GST_02.raw
	High	REEAFPHDVINVLADAPNPDDPEDFPALA	Unambiguous	4	1	XP_018091381.1		CID	1	0	1	1	72.69	4.76369e-07	1	2.80717	0	3	1058.84	3174.5	0.365233	97.9086	11001	11001	MS2	17/302	170306_chiba_GST_02.raw
	High	FQQLLDDESDPLDFLYQSAVEVTHR	Unambiguous	4	1	XP_018091381.1		CID	1	0	1	1	72.47	8.55021e-07	0	32.9656	6	3	989.144	2965.42	-0.96007	142.502	16846	16846	MS2	16/272	170306_chiba_GST_02.raw
	High	FQQLLDDESDPLDFLYQSAVEVTHR	Unambiguous	4	1	XP_018091381.1		CID	1	0	1	1	72.09	9.36295e-07	0	29.9021	6	3	989.144	2965.42	-1.51579	123.134	14378	14378	MS2	19/272	170306_chiba_GST_02.raw
	High	FQQLLDDESDPLDFLYQSAVEVTHR	Unambiguous	4	1	XP_018091381.1		CID	1	0	1	1	71.94	1.00119e-06	0	21.665	14	3	989.147	2965.43	1.32456	126.812	14861	14861	MS2	21/272	170306_chiba_GST_02.raw
	High	FQQLLDDESDPLDFLYQSAVEVTHR	Unambiguous	4	1	XP_018091381.1		CID	1	0	1	1	71.93	9.97081e-07	0	8.62755	12	3	989.147	2965.43	1.44806	137.276	16190	16190	MS2	21/272	170306_chiba_GST_02.raw
	High	FQQLLDDESDPLDFLYQSAVEVTHR	Unambiguous	4	1	XP_018091381.1		CID	1	0	1	1	70.48	1.33857e-06	0	6.72801	1	3	989.146	2965.42	0.830589	121.41	14152	14152	MS2	24/272	170306_chiba_GST_02.raw
	High	FQQLLDDESDPLDFLYQSAVEVTHR	Unambiguous	4	1	XP_018091381.1		CID	1	0	1	1	70.14	1.53472e-06	0	26.1334	4	3	989.146	2965.42	0.213121	121.991	14228	14228	MS2	28/272	170306_chiba_GST_02.raw
	High	FQQLLDDESDPLDFLYQSAVEVTHR	Unambiguous	4	1	XP_018091381.1		CID	1	0	1	1	69.61	1.61359e-06	0	0	51	3	989.145	2965.42	-0.0956135	145.846	17231	17231	MS2	25/272	170306_chiba_GST_02.raw
	High	FQQLLDDESDPLDFLYQSAVEVTHR	Unambiguous	4	1	XP_018091381.1		CID	1	0	1	1	68.47	2.24017e-06	0	20.4012	11	3	989.147	2965.43	1.26282	127.279	14921	14921	MS2	18/272	170306_chiba_GST_02.raw
	High	FQQLLDDESDPLDFLYQSAVEVTHR	Unambiguous	4	1	XP_018091381.1		CID	1	0	1	1	65.39	4.42274e-06	0	13.0299	3	3	989.145	2965.42	-0.836577	123.863	14475	14475	MS2	21/272	170306_chiba_GST_02.raw
	High	VTQNENVDSQVK	Unambiguous	4	1	XP_018091381.1		CID	1	0	1	1	63.35	9.2245e-06	0	4.5188	0	2	680.839	1360.67	0.43709	43.1526	2740	2740	MS2	8/120	170306_chiba_GST_02.raw
	High	FQQLLDDESDPLDFLYQSAVEVTHR	Unambiguous	4	1	XP_018091381.1		CID	1	0	1	1	62.35	8.73155e-06	0	15.5686	8	3	989.145	2965.42	-0.651336	134.767	15875	15875	MS2	25/272	170306_chiba_GST_02.raw
	High	SAEYSIEKPMEIMDQDK	Unambiguous	4	1	XP_018091381.1		CID	1	0	1	1	60.11	7.01993e-06	0	9.07933	0	2	1007.46	2013.92	0.608622	71.8242	7264	7264	MS2	11/176	170306_chiba_GST_02.raw
	High	KPETSVPSK	Unambiguous	4	1	XP_018091381.1		CID	0.4828	0	1	1	58.17	4.01588e-05	0	5.68027	0	2	486.772	972.536	-0.0236074	41.4671	2455	2455	MS2	8/90	170306_chiba_GST_02.raw
	High	KAVVVGGSTDVK	Unambiguous	4	1	XP_018091381.1		CID	1	0	1	1	55.37	4.13823e-05	1	3.64721	0	2	580.338	1159.67	0.0682862	43.3365	2769	2769	MS2	10/114	170306_chiba_GST_02.raw
	High	AVVVGGSTDVK	Unambiguous	4	1	XP_018091381.1		CID	1	0	1	1	54.79	8.84499e-05	0	8.20012	0	2	516.291	1031.57	0.54942	45.3668	3108	3108	MS2	9/84	170306_chiba_GST_02.raw
	High	SAEYSIEKPMEIMDQDK	Unambiguous	4	1	XP_018091381.1		CID	1	0	1	1	53.87	3.09704e-05	0	13.574	0	3	671.977	2013.92	0.783785	71.8169	7263	7263	MS2	16/176	170306_chiba_GST_02.raw
	High	EAFSEIEAVPVEEQVETTETEATEEHGK	Unambiguous	4	1	XP_018091381.1		CID	1	0	1	1	53.67	3.13562e-05	0	3.08172	0	3	1040.15	3118.42	0.448926	79.4827	8398	8398	MS2	21/292	170306_chiba_GST_02.raw
	High	FQQLLDDESDPLDFLYQSAVEVTHR	Unambiguous	4	1	XP_018091381.1		CID	1	0	1	1	44.05	0.000590325	0	18.448	5	3	989.145	2965.42	-0.651336	124.801	14598	14598	MS2	21/272	170306_chiba_GST_02.raw
	High	SAEYSIEKPMEIMDQDK	Unambiguous	4	1	XP_018091381.1		CID	1	0	1	1	40.17	0.000692361	0	10.1163	2	2	1007.46	2013.92	0.608622	72.6134	7386	7386	MS2	7/176	170306_chiba_GST_02.raw
	High	VSEETNDDGFSQEMSLDEWK	Unambiguous	4	1	XP_018091381.1		CID	1	0	1	1	36.68	0.000289957	0	33.5159	0	3	782.663	2345.97	0.802023	80.8429	8596	8596	MS2	14/212	170306_chiba_GST_02.raw
NP_001104210.1	40S ribosomal protein S3a-B [Xenopus laevis]	3551.68	49.24	1	2	16	63	264	29.8637	9.71533
	Confidence Level	Sequence	PSM Ambiguity	# Proteins	# Protein Groups	Protein Group Accessions	Modifications	Activation Type	ΔScore	ΔCn	Rank	Search Engine Rank	IonScore	Exp Value	# Missed Cleavages	Isolation Interference [%]	Ion Inject Time [ms]	Charge	m/z [Da]	MH+ [Da]	ΔM [ppm]	RT [min]	First Scan	Last Scan	MS Order	Ions Matched	Spectrum File
	High	VFEVSLADLQNDEVAFR	Unambiguous	2	2	NP_001080325.1;NP_001104210.1		CID	1	0	1	1	130.04	1.67451e-12	0	2.67602	1	2	976.492	1951.98	0.646125	96.8568	10855	10855	MS2	24/162	170306_chiba_GST_02.raw
	High	VFEVSLADLQNDEVAFR	Unambiguous	2	2	NP_001080325.1;NP_001104210.1		CID	1	0	1	1	108.83	1.98341e-10	0	39.8085	27	2	976.492	1951.98	0.458514	136.17	16055	16055	MS2	13/162	170306_chiba_GST_02.raw
	High	VFEVSLADLQNDEVAFR	Unambiguous	2	2	NP_001080325.1;NP_001104210.1		CID	1	0	1	1	104.78	4.92336e-10	0	4.92023	0	2	976.492	1951.98	0.208367	95.061	10602	10602	MS2	21/162	170306_chiba_GST_02.raw
	High	VFEVSLADLQNDEVAFR	Unambiguous	2	2	NP_001080325.1;NP_001104210.1		CID	1	0	1	1	102.95	7.52881e-10	0	39.7783	30	2	976.492	1951.98	0.0207572	133.514	15718	15718	MS2	11/162	170306_chiba_GST_02.raw
	High	VFEVSLADLQNDEVAFR	Unambiguous	2	2	NP_001080325.1;NP_001104210.1		CID	1	0	1	1	98.35	2.16402e-09	0	29.8677	3	2	976.492	1951.98	0.270904	102.345	11607	11607	MS2	12/162	170306_chiba_GST_02.raw
	High	VFEVSLADLQNDEVAFR	Unambiguous	2	2	NP_001080325.1;NP_001104210.1		CID	1	0	1	1	96.6	3.23789e-09	0	8.78394	0	2	976.492	1951.98	0.208367	95.9547	10729	10729	MS2	10/162	170306_chiba_GST_02.raw
	High	VFEVSLADLQNDEVAFR	Unambiguous	2	2	NP_001080325.1;NP_001104210.1		CID	1	0	1	1	93.4	6.74205e-09	0	35.4926	19	2	976.492	1951.98	0.333441	141.724	16746	16746	MS2	12/162	170306_chiba_GST_02.raw
	High	VFEVSLADLQNDEVAFR	Unambiguous	2	2	NP_001080325.1;NP_001104210.1		CID	1	0	1	1	90.62	1.28744e-08	0	27.8184	14	2	976.492	1951.98	-0.0417796	130.519	15340	15340	MS2	12/162	170306_chiba_GST_02.raw
	High	VFEVSLADLQNDEVAFR	Unambiguous	2	2	NP_001080325.1;NP_001104210.1		CID	1	0	1	1	90.32	1.37487e-08	0	13.0438	1	2	976.492	1951.98	0.208367	97.6478	10965	10965	MS2	19/162	170306_chiba_GST_02.raw
	High	VFEVSLADLQNDEVAFR	Unambiguous	2	2	NP_001080325.1;NP_001104210.1		CID	1	0	1	1	90.19	1.45015e-08	0	55.5906	34	2	976.492	1951.98	0.521051	142.214	16809	16809	MS2	10/162	170306_chiba_GST_02.raw
	High	VFEVSLADLQNDEVAFR	Unambiguous	2	2	NP_001080325.1;NP_001104210.1		CID	1	0	1	1	90.13	1.47032e-08	0	27.4782	15	2	976.492	1951.98	0.521051	129.575	15218	15218	MS2	10/162	170306_chiba_GST_02.raw
	High	VFEVSLADLQNDEVAFR	Unambiguous	2	2	NP_001080325.1;NP_001104210.1		CID	1	0	1	1	90.06	1.45969e-08	0	0	44	2	976.491	1951.98	-0.354464	136.355	16077	16077	MS2	10/162	170306_chiba_GST_02.raw
	High	VFEVSLADLQNDEVAFR	Unambiguous	2	2	NP_001080325.1;NP_001104210.1		CID	1	0	1	1	89.67	1.6346e-08	0	31.0804	18	2	976.492	1951.98	0.458514	121.214	14127	14127	MS2	10/162	170306_chiba_GST_02.raw
	High	ACQSIYPLHDVYAR	Unambiguous	1	1	NP_001104210.1		CID	1	0	1	1	87.41	2.14231e-08	0	6.90576	1	2	818.401	1635.8	0.233718	63.2137	5949	5949	MS2	20/138	170306_chiba_GST_02.raw
	High	VFEVSLADLQNDEVAFR	Unambiguous	2	2	NP_001080325.1;NP_001104210.1		CID	1	0	1	1	86.75	3.13853e-08	0	21.9777	58	2	976.491	1951.98	-0.22939	144.184	17057	17057	MS2	19/162	170306_chiba_GST_02.raw
	High	VFEVSLADLQNDEVAFR	Unambiguous	2	2	NP_001080325.1;NP_001104210.1		CID	1	0	1	1	86.73	3.16363e-08	0	39.4825	11	2	976.492	1951.98	0.395978	125.028	14627	14627	MS2	19/162	170306_chiba_GST_02.raw
	High	VFEVSLADLQNDEVAFR	Unambiguous	2	2	NP_001080325.1;NP_001104210.1		CID	1	0	1	1	86.72	3.22413e-08	0	7.04342	13	2	976.492	1951.98	0.521051	135.536	15973	15973	MS2	11/162	170306_chiba_GST_02.raw
	High	VFEVSLADLQNDEVAFR	Unambiguous	2	2	NP_001080325.1;NP_001104210.1		CID	1	0	1	1	86.24	3.51772e-08	0	6.21267	0	2	976.492	1951.98	0.208367	94.2986	10497	10497	MS2	11/162	170306_chiba_GST_02.raw
	High	VFEVSLADLQNDEVAFR	Unambiguous	2	2	NP_001080325.1;NP_001104210.1		CID	1	0	1	1	85.73	3.98278e-08	0	27.0313	2	2	976.492	1951.98	0.395978	102.027	11564	11564	MS2	10/162	170306_chiba_GST_02.raw
	High	VFEVSLADLQNDEVAFR	Unambiguous	2	2	NP_001080325.1;NP_001104210.1		CID	1	0	1	1	85.65	4.05682e-08	0	15.7613	1	2	976.492	1951.98	0.395978	99.4962	11218	11218	MS2	10/162	170306_chiba_GST_02.raw
	High	VFEVSLADLQNDEVAFR	Unambiguous	2	2	NP_001080325.1;NP_001104210.1		CID	1	0	1	1	83.2	7.08373e-08	0	4.56982	0	3	651.33	1951.98	0.17021	95.0682	10603	10603	MS2	13/162	170306_chiba_GST_02.raw
	High	VFEVSLADLQNDEVAFR	Unambiguous	2	2	NP_001080325.1;NP_001104210.1		CID	1	0	1	1	82.14	9.74453e-08	0	14.2502	2	2	976.493	1951.98	0.958808	101.86	11541	11541	MS2	19/162	170306_chiba_GST_02.raw
	High	VFEVSLADLQNDEVAFR	Unambiguous	2	2	NP_001080325.1;NP_001104210.1		CID	1	0	1	1	82.04	9.28381e-08	0	30.5628	100	2	976.492	1951.98	-0.104316	148.805	17508	17508	MS2	9/162	170306_chiba_GST_02.raw
	High	VFEVSLADLQNDEVAFR	Unambiguous	2	2	NP_001080325.1;NP_001104210.1		CID	1	0	1	1	81.46	1.17535e-07	0	70.8268	20	2	976.491	1951.98	-0.417001	138.08	16290	16290	MS2	11/162	170306_chiba_GST_02.raw
	High	VFEVSLADLQNDEVAFR	Unambiguous	2	2	NP_001080325.1;NP_001104210.1		CID	1	0	1	1	80.66	1.31859e-07	0	17.2829	100	2	976.491	1951.97	-1.04237	150.439	17643	17643	MS2	11/162	170306_chiba_GST_02.raw
	High	VFEVSLADLQNDEVAFR	Unambiguous	2	2	NP_001080325.1;NP_001104210.1		CID	1	0	1	1	79.6	1.62827e-07	0	28.0721	26	2	976.492	1951.98	0.0207572	141.42	16708	16708	MS2	19/162	170306_chiba_GST_02.raw
	High	VFEVSLADLQNDEVAFR	Unambiguous	2	2	NP_001080325.1;NP_001104210.1		CID	1	0	1	1	79.6	1.62279e-07	0	44.353	24	2	976.492	1951.98	0.145831	135.676	15991	15991	MS2	19/162	170306_chiba_GST_02.raw
	High	VFEVSLADLQNDEVAFR	Unambiguous	2	2	NP_001080325.1;NP_001104210.1		CID	1	0	1	1	79.48	1.67952e-07	0	24.5219	46	2	976.492	1951.98	0.395978	139.257	16437	16437	MS2	19/162	170306_chiba_GST_02.raw
	High	VFEVSLADLQNDEVAFR	Unambiguous	2	2	NP_001080325.1;NP_001104210.1		CID	1	0	1	1	78.94	1.88913e-07	0	36.0749	3	2	976.492	1951.98	0.145831	101.388	11477	11477	MS2	11/162	170306_chiba_GST_02.raw
	High	VFEVSLADLQNDEVAFR	Unambiguous	2	2	NP_001080325.1;NP_001104210.1		CID	1	0	1	1	77.59	2.86527e-07	0	16.1438	44	2	976.491	1951.98	-0.479537	140.577	16604	16604	MS2	9/162	170306_chiba_GST_02.raw
	High	VFEVSLADLQNDEVAFR	Unambiguous	2	2	NP_001080325.1;NP_001104210.1		CID	1	0	1	1	77.44	3.02907e-07	0	18.0118	3	2	976.492	1951.98	0.708661	102.446	11621	11621	MS2	12/162	170306_chiba_GST_02.raw
	High	VFEVSLADLQNDEVAFR	Unambiguous	2	2	NP_001080325.1;NP_001104210.1		CID	1	0	1	1	77.35	2.73355e-07	0	44.6389	11	2	976.492	1951.98	-0.104316	118.664	13789	13789	MS2	9/162	170306_chiba_GST_02.raw
	High	VFEVSLADLQNDEVAFR	Unambiguous	2	2	NP_001080325.1;NP_001104210.1		CID	1	0	1	1	76.9	3.04219e-07	0	24.3817	1	2	976.492	1951.98	0.395978	101.025	11427	11427	MS2	12/162	170306_chiba_GST_02.raw
	High	VFEVSLADLQNDEVAFR	Unambiguous	2	2	NP_001080325.1;NP_001104210.1		CID	1	0	1	1	76.74	3.82364e-07	0	14.317	5	2	976.493	1951.98	1.14642	101.267	11461	11461	MS2	11/162	170306_chiba_GST_02.raw
	High	NCLTNFHGMDLTR	Unambiguous	2	2	NP_001080325.1;NP_001104210.1		CID	1	0	1	1	76.63	1.49916e-07	0	21.1114	1	2	761.351	1521.69	0.40891	70.0801	7004	7004	MS2	11/136	170306_chiba_GST_02.raw
	High	VFEVSLADLQNDEVAFR	Unambiguous	2	2	NP_001080325.1;NP_001104210.1		CID	1	0	1	1	74.89	4.91375e-07	0	37.2411	1	2	976.492	1951.98	0.521051	98.6994	11109	11109	MS2	12/162	170306_chiba_GST_02.raw
	High	VFEVSLADLQNDEVAFR	Unambiguous	2	2	NP_001080325.1;NP_001104210.1		CID	1	0	1	1	73.85	6.09904e-07	0	6.09219	0	3	651.33	1951.98	0.0764053	94.3126	10499	10499	MS2	12/162	170306_chiba_GST_02.raw
	High	KTSYAQHQQVR	Unambiguous	2	2	NP_001080325.1;NP_001104210.1		CID	1	0	1	1	71.34	1.52779e-06	1	2.35	5	2	673.352	1345.7	-0.514654	41.1668	2407	2407	MS2	9/102	170306_chiba_GST_02.raw
	High	LITEDVQGK	Unambiguous	2	2	NP_001080325.1;NP_001104210.1		CID	1	0	1	1	69.2	2.95757e-06	0	5.1103	0	2	501.777	1002.55	0.63589	46.2056	3249	3249	MS2	13/72	170306_chiba_GST_02.raw
	High	VFEVSLADLQNDEVAFR	Unambiguous	2	2	NP_001080325.1;NP_001104210.1		CID	1	0	1	1	68.98	1.88446e-06	0	15.2655	9	2	976.492	1951.98	0.395978	128.182	15039	15039	MS2	21/162	170306_chiba_GST_02.raw
	High	VFEVSLADLQNDEVAFR	Unambiguous	2	2	NP_001080325.1;NP_001104210.1		CID	1	0	1	1	66.02	3.70051e-06	0	8.70675	1	3	651.33	1951.98	0.0764053	95.9621	10730	10730	MS2	10/162	170306_chiba_GST_02.raw
	High	VFEVSLADLQNDEVAFR	Unambiguous	2	2	NP_001080325.1;NP_001104210.1		CID	1	0	1	1	65.55	4.22097e-06	0	65.6294	4	2	976.492	1951.98	0.458514	104.845	11943	11943	MS2	10/162	170306_chiba_GST_02.raw
	High	VFEVSLADLQNDEVAFR	Unambiguous	2	2	NP_001080325.1;NP_001104210.1		CID	1	0	1	1	64.51	5.22146e-06	0	33.9059	1	2	976.492	1951.98	0.333441	100.274	11324	11324	MS2	11/162	170306_chiba_GST_02.raw
	High	TSYAQHQQVR	Unambiguous	2	2	NP_001080325.1;NP_001104210.1		CID	1	0	1	1	62.55	6.86542e-06	0	1.63023	0	2	609.305	1217.6	0.132408	41.8537	2519	2519	MS2	8/84	170306_chiba_GST_02.raw
	High	TTDGYLLR	Unambiguous	2	2	NP_001080325.1;NP_001104210.1		CID	1	0	1	1	62.06	9.77011e-06	0	9.50725	0	2	469.751	938.494	0.311243	52.4463	4261	4261	MS2	7/60	170306_chiba_GST_02.raw
	High	VFEVSLADLQNDEVAFR	Unambiguous	2	2	NP_001080325.1;NP_001104210.1		CID	1	0	1	1	57.71	2.50762e-05	0	81.6586	1	3	651.33	1951.98	0.264016	99.6709	11243	11243	MS2	13/162	170306_chiba_GST_02.raw
	High	KTSYAQHQQVR	Unambiguous	2	2	NP_001080325.1;NP_001104210.1		CID	1	0	1	1	57.36	4.00365e-05	1	5.77371	0	3	449.237	1345.7	0.0196233	41.0772	2391	2391	MS2	9/102	170306_chiba_GST_02.raw
	High	VFEVSLADLQNDEVAFR	Unambiguous	2	2	NP_001080325.1;NP_001104210.1		CID	1	0	1	1	54	5.89199e-05	0	42.1268	1	3	651.33	1951.98	0.17021	97.1159	10891	10891	MS2	21/162	170306_chiba_GST_02.raw
	High	VFEVSLADLQNDEVAFR	Unambiguous	2	2	NP_001080325.1;NP_001104210.1		CID	1	0	1	1	53.2	8.08885e-05	0	66.9653	2	3	651.331	1951.98	0.639236	99.5439	11225	11225	MS2	12/162	170306_chiba_GST_02.raw
	High	APAMFNIR	Unambiguous	2	2	NP_001080325.1;NP_001104210.1		CID	1	0	1	1	48.98	0.000464158	0	5.70581	0	2	460.245	919.482	-0.101376	66.0196	6382	6382	MS2	7/62	170306_chiba_GST_02.raw
	High	APAMFNIR	Unambiguous	2	2	NP_001080325.1;NP_001104210.1		CID	1	0	1	1	45.8	0.000965308	0	18.1893	0	2	460.245	919.482	-0.101376	66.8531	6510	6510	MS2	7/62	170306_chiba_GST_02.raw
	High	LFCVGFTK	Unambiguous	2	2	NP_001080325.1;NP_001104210.1		CID	1	0	1	1	44.12	0.000212992	0	5.13739	0	2	457.744	914.481	0.505527	77.4875	8107	8107	MS2	7/56	170306_chiba_GST_02.raw
	High	WQTMIEAHVDVK	Unambiguous	2	2	NP_001080325.1;NP_001104210.1		CID	1	0	1	1	43.67	0.00070444	0	41.1928	2	2	728.866	1456.73	-0.0782403	62.7376	5875	5875	MS2	8/122	170306_chiba_GST_02.raw
	High	VFEVSLADLQNDEVAFR	Unambiguous	2	2	NP_001080325.1;NP_001104210.1		CID	1	0	1	1	43.3	0.000696925	0	52.6101	9	2	976.492	1951.98	0.395978	122.596	14308	14308	MS2	21/162	170306_chiba_GST_02.raw
	High	IVDPFSK	Unambiguous	2	2	NP_001080325.1;NP_001104210.1		CID	1	0	1	1	41.17	0.000733282	0	6.24454	0	2	403.226	805.445	-0.592731	60.7983	5569	5569	MS2	6/54	170306_chiba_GST_02.raw
	High	EVQTNDLK	Unambiguous	2	2	NP_001080325.1;NP_001104210.1		CID	1	0	1	1	40.28	0.00220796	0	25.1033	0	2	473.746	946.484	0.273886	43.5731	2809	2809	MS2	7/76	170306_chiba_GST_02.raw
	High	ACQSIYPLHDVYAR	Unambiguous	1	1	NP_001104210.1		CID	1	0	1	1	37.12	0.00247463	0	21.0066	0	3	545.937	1635.8	0.561307	63.1821	5944	5944	MS2	15/138	170306_chiba_GST_02.raw
	High	KWQTMIEAHVDVK	Unambiguous	2	2	NP_001080325.1;NP_001104210.1		CID	1	0	1	1	34.16	0.00514168	1	40.7387	0	3	528.945	1584.82	0.189629	55.2293	4699	4699	MS2	9/134	170306_chiba_GST_02.raw
	High	IVDPFSK	Unambiguous	2	2	NP_001080325.1;NP_001104210.1		CID	1	0	1	1	33.16	0.00381616	0	5.48524	0	2	403.226	805.445	-0.138062	60.0325	5451	5451	MS2	5/54	170306_chiba_GST_02.raw
	High	KIVDPFSK	Unambiguous	2	2	NP_001080325.1;NP_001104210.1		CID	1	0	1	1	31.91	0.00444477	1	17.4598	0	2	467.274	933.541	0.208537	51.2617	4071	4071	MS2	5/76	170306_chiba_GST_02.raw
	High	MMEIMSR	Unambiguous	1	1	NP_001104210.1		CID	1	0	1	1	31.24	0.00202938	0	13.4521	0	2	449.203	897.399	-0.209405	53.3837	4409	4409	MS2	5/54	170306_chiba_GST_02.raw
	High	VFEVSLADLQNDEVAFR	Unambiguous	2	2	NP_001080325.1;NP_001104210.1		CID	1	0	1	1	31.13	0.0114094	0	49.1547	85	3	651.33	1951.98	0.17021	146.351	17278	17278	MS2	16/162	170306_chiba_GST_02.raw
	High	DWYDVK	Unambiguous	2	2	NP_001080325.1;NP_001104210.1		CID	1	0	1	1	29.41	0.00458205	0	15.197	0	2	413.193	825.378	0.249566	60.6913	5554	5554	MS2	4/46	170306_chiba_GST_02.raw
NP_001080341.1	ribosomal protein L3 L homeolog [Xenopus laevis]	3436.51	50.87	2	4	18	80	403	46.0118	10.1694
	Confidence Level	Sequence	PSM Ambiguity	# Proteins	# Protein Groups	Protein Group Accessions	Modifications	Activation Type	ΔScore	ΔCn	Rank	Search Engine Rank	IonScore	Exp Value	# Missed Cleavages	Isolation Interference [%]	Ion Inject Time [ms]	Charge	m/z [Da]	MH+ [Da]	ΔM [ppm]	RT [min]	First Scan	Last Scan	MS Order	Ions Matched	Spectrum File
	High	LEQQVVIGGVFGQDEMIDVIGVTK	Unambiguous	1	1	NP_001080341.1		CID	1	0	1	1	117.52	2.00907e-11	0	9.13456	2	2	1287.68	2574.34	-1.73619	102.192	11586	11586	MS2	15/268	170306_chiba_GST_02.raw
	High	LEQQVVIGGVFGQDEMIDVIGVTK	Unambiguous	1	1	NP_001080341.1		CID	1	0	1	1	114.97	3.66183e-11	0	11.9405	4	2	1287.68	2574.35	0.729542	101.844	11539	11539	MS2	16/268	170306_chiba_GST_02.raw
	High	EKLEQQVVIGGVFGQDEMIDVIGVTK	Unambiguous	1	1	NP_001080341.1		CID	1	0	1	1	94.76	2.95763e-09	1	9.92662	2	2	1416.25	2831.49	1.31111	94.5014	10525	10525	MS2	14/296	170306_chiba_GST_02.raw
	High	EKLEQQVVIGGVFGQDEMIDVIGVTK	Unambiguous	1	1	NP_001080341.1		CID	1	0	1	1	94.21	3.31901e-09	1	2.98205	0	3	944.501	2831.49	1.13391	95.8048	10708	10708	MS2	12/296	170306_chiba_GST_02.raw
	High	SHLMEIQVNGGTIAEK	Unambiguous	2	2	NP_001080341.1;XP_018116701.1		CID	1	0	1	1	91.36	1.02725e-08	0	1.97235	0	2	863.943	1726.88	0.0641794	56.5861	4913	4913	MS2	19/166	170306_chiba_GST_02.raw
	High	LEQQVVIGGVFGQDEMIDVIGVTK	Unambiguous	1	1	NP_001080341.1		CID	1	0	1	1	89.13	1.4906e-08	0	22.1224	3	2	1287.68	2574.35	0.53987	101.425	11482	11482	MS2	13/268	170306_chiba_GST_02.raw
	High	EKLEQQVVIGGVFGQDEMIDVIGVTK	Unambiguous	1	1	NP_001080341.1		CID	1	0	1	1	88.66	1.19807e-08	1	15.927	1	3	944.501	2831.49	0.422571	99.7754	11257	11257	MS2	15/296	170306_chiba_GST_02.raw
	High	VACIGAWHPAR	Unambiguous	7	2	NP_001080341.1;XP_018116701.1		CID	1	0	1	1	86.3	3.657e-08	0	24.4388	0	2	590.806	1180.6	0.264802	51.4423	4100	4100	MS2	9/82	170306_chiba_GST_02.raw
	High	SHLMEIQVNGGTIAEK	Unambiguous	2	2	NP_001080341.1;XP_018116701.1		CID	1	0	1	1	84.34	5.02496e-08	0	17.7444	2	2	863.944	1726.88	0.558998	57.771	5098	5098	MS2	18/166	170306_chiba_GST_02.raw
	High	EKLEQQVVIGGVFGQDEMIDVIGVTK	Unambiguous	1	1	NP_001080341.1		CID	1	0	1	1	84.27	3.31088e-08	1	35.9242	2	3	944.501	2831.49	1.19858	101.992	11559	11559	MS2	15/296	170306_chiba_GST_02.raw
	High	SHLMEIQVNGGTIAEK	Unambiguous	2	2	NP_001080341.1;XP_018116701.1		CID	1	0	1	1	83.16	6.30392e-08	0	27.7691	1	2	863.943	1726.88	-0.00650903	57.3938	5040	5040	MS2	12/166	170306_chiba_GST_02.raw
	High	EKLEQQVVIGGVFGQDEMIDVIGVTK	Unambiguous	1	1	NP_001080341.1		CID	1	0	1	1	82.85	4.56544e-08	1	6.36067	1	3	944.501	2831.49	0.422571	97.4701	10940	10940	MS2	17/296	170306_chiba_GST_02.raw
	High	SHLMEIQVNGGTIAEK	Unambiguous	2	2	NP_001080341.1;XP_018116701.1		CID	1	0	1	1	82.65	7.06225e-08	0	19.7226	1	2	863.943	1726.88	-0.0771974	57.7142	5090	5090	MS2	24/166	170306_chiba_GST_02.raw
	High	SINPLGGFVHYGEVK	Unambiguous	2	2	NP_001080341.1;XP_018116701.1		CID	1	0	1	1	82.34	7.73065e-08	0	16.4726	0	2	808.926	1616.84	0.68317	77.8897	8167	8167	MS2	10/160	170306_chiba_GST_02.raw
	High	EKLEQQVVIGGVFGQDEMIDVIGVTK	Unambiguous	1	1	NP_001080341.1		CID	1	0	1	1	81.7	6.01714e-08	1	6.11325	0	3	944.5	2831.49	0.163901	96.7188	10836	10836	MS2	13/296	170306_chiba_GST_02.raw
	High	EKLEQQVVIGGVFGQDEMIDVIGVTK	Unambiguous	1	1	NP_001080341.1		CID	1	0	1	1	79.03	1.11273e-07	1	3.36376	0	3	944.5	2831.49	0.163901	94.1761	10480	10480	MS2	11/296	170306_chiba_GST_02.raw
	High	SINPLGGFVHYGEVK	Unambiguous	2	2	NP_001080341.1;XP_018116701.1		CID	1	0	1	1	77.16	2.75002e-07	0	10.7199	0	2	808.925	1616.84	0.154677	78.7997	8300	8300	MS2	10/160	170306_chiba_GST_02.raw
	High	EKLEQQVVIGGVFGQDEMIDVIGVTK	Unambiguous	1	1	NP_001080341.1		CID	1	0	1	1	76.18	2.15687e-07	1	26.5211	0	3	944.501	2831.49	0.745909	98.9929	11149	11149	MS2	14/296	170306_chiba_GST_02.raw
	High	EKLEQQVVIGGVFGQDEMIDVIGVTK	Unambiguous	1	1	NP_001080341.1		CID	1	0	1	1	75.65	2.4232e-07	1	17.8097	1	3	944.5	2831.49	0.163901	97.7777	10983	10983	MS2	23/296	170306_chiba_GST_02.raw
	High	LEQQVVIGGVFGQDEMIDVIGVTK	Unambiguous	1	1	NP_001080341.1		CID	1	0	1	1	74.16	4.41263e-07	0	22.263	1	3	858.788	2574.35	-0.0343682	101.328	11469	11469	MS2	24/268	170306_chiba_GST_02.raw
	High	EKLEQQVVIGGVFGQDEMIDVIGVTK	Unambiguous	1	1	NP_001080341.1		CID	1	0	1	1	72.25	5.30139e-07	1	2.76638	0	3	944.5	2831.49	0.163901	94.9163	10581	10581	MS2	10/296	170306_chiba_GST_02.raw
	High	EVVEAVTVVETPPMVIVGIVGYVQTPR	Unambiguous	2	2	NP_001080341.1;XP_018116701.1		CID	1	0	1	1	72.16	3.83125e-07	0	12.277	25	2	1441.29	2881.58	0.515007	142.107	16795	16795	MS2	11/262	170306_chiba_GST_02.raw
	High	HGSLGFLPR	Unambiguous	3	2	NP_001080341.1;XP_018116701.1		CID	1	0	1	1	71.92	3.0849e-07	0	46.1322	0	2	492.275	983.542	-0.00960146	53.6788	4456	4456	MS2	7/64	170306_chiba_GST_02.raw
	High	NNASTDYDLSDK	Unambiguous	2	2	NP_001080341.1;XP_018116701.1		CID	1	0	1	1	71.72	1.68244e-07	0	7.67938	0	2	671.792	1342.58	1.33396	45.9921	3213	3213	MS2	7/124	170306_chiba_GST_02.raw
	High	EKLEQQVVIGGVFGQDEMIDVIGVTK	Unambiguous	1	1	NP_001080341.1		CID	1	0	1	1	71.26	6.65871e-07	1	5.21626	1	3	944.5	2831.49	0.0992332	98.2524	11048	11048	MS2	11/296	170306_chiba_GST_02.raw
	High	EKLEQQVVIGGVFGQDEMIDVIGVTK	Unambiguous	1	1	NP_001080341.1		CID	1	0	1	1	70.28	8.25055e-07	1	4.15994	4	3	944.501	2831.49	0.422571	118.967	13830	13830	MS2	10/296	170306_chiba_GST_02.raw
	High	EKLEQQVVIGGVFGQDEMIDVIGVTK	Unambiguous	1	1	NP_001080341.1		CID	1	0	1	1	68.68	8.60545e-07	1	6.78655	2	2	1416.25	2831.49	2.34579	94.8176	10568	10568	MS2	13/296	170306_chiba_GST_02.raw
	High	EVVEAVTVVETPPMVIVGIVGYVQTPR	Unambiguous	2	2	NP_001080341.1;XP_018116701.1		CID	1	0	1	1	67.62	9.60048e-07	0	8.59997	12	2	1441.29	2881.58	2.04005	133.172	15674	15674	MS2	22/262	170306_chiba_GST_02.raw
	High	LEQQVVIGGVFGQDEMIDVIGVTK	Unambiguous	1	1	NP_001080341.1		CID	1	0	1	1	66.99	2.54982e-06	0	13.4854	1	3	858.788	2574.35	0.321266	101.787	11531	11531	MS2	25/268	170306_chiba_GST_02.raw
	High	EKLEQQVVIGGVFGQDEMIDVIGVTK	Unambiguous	1	1	NP_001080341.1		CID	1	0	1	1	65.41	2.37385e-06	1	26.8682	2	3	944.502	2831.49	1.78059	100.619	11371	11371	MS2	15/296	170306_chiba_GST_02.raw
	High	EKLEQQVVIGGVFGQDEMIDVIGVTK	Unambiguous	1	1	NP_001080341.1		CID	1	0	1	1	64.69	3.12455e-06	1	33.6311	5	3	944.5	2831.49	0.293236	119.14	13853	13853	MS2	12/296	170306_chiba_GST_02.raw
	High	EVVEAVTVVETPPMVIVGIVGYVQTPR	Unambiguous	2	2	NP_001080341.1;XP_018116701.1		CID	1	0	1	1	62.45	3.47e-06	0	0	11	2	1441.29	2881.58	1.10808	129.769	15244	15244	MS2	21/262	170306_chiba_GST_02.raw
	High	DDPSKPIHLTAFLGYK	Unambiguous	2	2	NP_001080341.1;XP_018116701.1		CID	1	0	1	1	60.86	1.57507e-05	0	18.8101	0	2	901.479	1801.95	1.03311	76.8164	8008	8008	MS2	21/160	170306_chiba_GST_02.raw
	High	AGMTHIVR	Unambiguous	3	2	NP_001080341.1;XP_018116701.1		CID	1	0	1	1	59.06	5.89785e-06	0	7.79178	0	2	442.742	884.477	0.100794	43.8139	2850	2850	MS2	7/56	170306_chiba_GST_02.raw
	High	HGSLGFLPR	Unambiguous	3	2	NP_001080341.1;XP_018116701.1		CID	1	0	1	1	59.04	5.98744e-06	0	8.21372	0	2	492.275	983.542	-0.257827	54.4213	4572	4572	MS2	7/64	170306_chiba_GST_02.raw
	High	EVVEAVTVVETPPMVIVGIVGYVQTPR	Unambiguous	2	2	NP_001080341.1;XP_018116701.1		CID	1	0	1	1	58.79	7.135e-06	0	14.7166	11	2	1441.29	2881.58	2.29422	126.983	14883	14883	MS2	13/262	170306_chiba_GST_02.raw
	High	EKLEQQVVIGGVFGQDEMIDVIGVTK	Unambiguous	1	1	NP_001080341.1		CID	1	0	1	1	57.99	1.39792e-05	1	24.7665	3	2	1416.25	2831.49	-0.240912	95.3157	10639	10639	MS2	12/296	170306_chiba_GST_02.raw
	High	VACIGAWHPAR	Unambiguous	7	2	NP_001080341.1;XP_018116701.1		CID	1	0	1	1	57.48	2.78692e-05	0	48.7246	1	2	590.806	1180.6	0.368199	51.7362	4147	4147	MS2	9/82	170306_chiba_GST_02.raw
	High	SLLVQTSR	Unambiguous	2	2	NP_001080341.1;XP_018116701.1		CID	0.2909	0	1	1	54.57	7.55889e-05	0	4.76876	0	2	452.267	903.526	0.0267506	48.7942	3671	3671	MS2	6/74	170306_chiba_GST_02.raw
	High	EKLEQQVVIGGVFGQDEMIDVIGVTK	Unambiguous	1	1	NP_001080341.1		CID	1	0	1	1	54.54	3.11131e-05	1	9.48641	3	3	944.501	2831.49	1.32792	118.76	13802	13802	MS2	13/296	170306_chiba_GST_02.raw
	High	LEQQVVIGGVFGQDEMIDVIGVTK	Unambiguous	1	1	NP_001080341.1		CID	1	0	1	1	54.38	4.17643e-05	0	30.6872	2	3	858.788	2574.35	0.179012	101.52	11495	11495	MS2	25/268	170306_chiba_GST_02.raw
	High	HGSLGFLPR	Unambiguous	3	2	NP_001080341.1;XP_018116701.1		CID	1	0	1	1	50.14	4.64773e-05	0	46.673	1	2	492.275	983.542	-0.319884	55.271	4706	4706	MS2	8/64	170306_chiba_GST_02.raw
	High	TIFAEHISDECKR	Unambiguous	6	2	NP_001080341.1;XP_018116701.1		CID	1	0	1	1	49.51	0.000152803	1	15.551	1	2	774.878	1548.75	0.416623	49.4073	3771	3771	MS2	14/116	170306_chiba_GST_02.raw
	High	EVVEAVTVVETPPMVIVGIVGYVQTPR	Unambiguous	2	2	NP_001080341.1;XP_018116701.1		CID	1	0	1	1	49.31	7.38483e-05	0	3.96079	1	3	961.197	2881.58	0.383254	124.285	14529	14529	MS2	23/262	170306_chiba_GST_02.raw
	High	VIAHTQMR	Unambiguous	2	2	NP_001080341.1;XP_018116701.1		CID	1	0	1	1	48.65	4.23021e-05	0	2.68776	0	2	478.261	955.514	0.2204	42.4625	2623	2623	MS2	7/60	170306_chiba_GST_02.raw
	High	SHLMEIQVNGGTIAEK	Unambiguous	2	2	NP_001080341.1;XP_018116701.1		CID	1	0	1	1	47.8	0.000215746	0	15.1274	0	3	576.298	1726.88	-0.297049	56.5612	4909	4909	MS2	16/166	170306_chiba_GST_02.raw
	High	EKLEQQVVIGGVFGQDEMIDVIGVTK	Unambiguous	1	1	NP_001080341.1		CID	1	0	1	1	47.57	0.000150487	1	25.0895	20	3	944.502	2831.49	1.84526	140.107	16543	16543	MS2	13/296	170306_chiba_GST_02.raw
	High	NDFIMLK	Unambiguous	1	1	NP_001080341.1		CID	1	0	1	1	47.26	7.1414e-05	0	6.3502	0	2	440.734	880.46	0.0148736	72.4985	7368	7368	MS2	6/60	170306_chiba_GST_02.raw
	High	HGSLGFLPR	Unambiguous	3	2	NP_001080341.1;XP_018116701.1		CID	1	0	1	1	46.59	0.000105255	0	58.789	1	2	492.275	983.542	-0.38194	55.5962	4758	4758	MS2	8/64	170306_chiba_GST_02.raw
	High	HGSLGFLPR	Unambiguous	3	2	NP_001080341.1;XP_018116701.1		CID	1	0	1	1	45.38	0.000268004	0	58.4593	1	2	492.275	983.543	0.610963	55.9983	4822	4822	MS2	8/64	170306_chiba_GST_02.raw
	High	EVVEAVTVVETPPMVIVGIVGYVQTPR	Unambiguous	2	2	NP_001080341.1;XP_018116701.1		CID	1	0	1	1	44.83	0.000212109	0	11.4282	7	2	1441.29	2881.58	1.70115	125.171	14646	14646	MS2	13/262	170306_chiba_GST_02.raw
	High	EKLEQQVVIGGVFGQDEMIDVIGVTK	Unambiguous	1	1	NP_001080341.1		CID	1	0	1	1	44.29	0.0003426	1	22.2535	3	3	944.5	2831.49	-0.288773	100.942	11416	11416	MS2	15/296	170306_chiba_GST_02.raw
	High	EVVEAVTVVETPPMVIVGIVGYVQTPR	Unambiguous	2	2	NP_001080341.1;XP_018116701.1		CID	1	0	1	1	43.11	0.000315181	0	17.9599	10	2	1441.29	2881.58	1.61643	130.622	15354	15354	MS2	10/262	170306_chiba_GST_02.raw
	High	EVVEAVTVVETPPMVIVGIVGYVQTPR	Unambiguous	2	2	NP_001080341.1;XP_018116701.1		CID	1	0	1	1	41.68	0.00040073	0	6.07208	1	3	961.197	2881.58	0.700972	135.414	15957	15957	MS2	19/262	170306_chiba_GST_02.raw
	High	EVVEAVTVVETPPMVIVGIVGYVQTPR	Unambiguous	2	2	NP_001080341.1;XP_018116701.1		CID	1	0	1	1	41.29	0.000438381	0	7.3697	1	3	961.197	2881.58	0.764515	130.585	15349	15349	MS2	16/262	170306_chiba_GST_02.raw
	High	EVVEAVTVVETPPMVIVGIVGYVQTPR	Unambiguous	2	2	NP_001080341.1;XP_018116701.1		CID	1	0	1	1	39.08	0.000753928	0	6.81394	21	2	1441.29	2881.58	1.1928	130.299	15313	15313	MS2	19/262	170306_chiba_GST_02.raw
	High	EVVEAVTVVETPPMVIVGIVGYVQTPR	Unambiguous	2	2	NP_001080341.1;XP_018116701.1		CID	1	0	1	1	38.31	0.000900181	0	7.40823	1	3	961.197	2881.58	0.955145	129.762	15243	15243	MS2	17/262	170306_chiba_GST_02.raw
	High	EVVEAVTVVETPPMVIVGIVGYVQTPR	Unambiguous	2	2	NP_001080341.1;XP_018116701.1		CID	1	0	1	1	37.33	0.00118353	0	14.9586	4	3	961.197	2881.58	0.256167	140.613	16608	16608	MS2	19/262	170306_chiba_GST_02.raw
	High	SHLMEIQVNGGTIAEK	Unambiguous	2	2	NP_001080341.1;XP_018116701.1		CID	1	0	1	1	36.56	0.00301393	0	9.0903	0	3	576.298	1726.88	0.339146	57.745	5094	5094	MS2	14/166	170306_chiba_GST_02.raw
	High	EVVEAVTVVETPPMVIVGIVGYVQTPR	Unambiguous	2	2	NP_001080341.1;XP_018116701.1		CID	1	0	1	1	36.38	0.00144991	0	10.8615	2	3	961.197	2881.58	0.637428	134.924	15895	15895	MS2	30/262	170306_chiba_GST_02.raw
	High	LEQQVVIGGVFGQDEMIDVIGVTK	Unambiguous	1	1	NP_001080341.1		CID	1	0	1	1	36.13	0.00280348	0	11.5814	1	3	858.788	2574.35	-0.0343682	102.111	11575	11575	MS2	19/268	170306_chiba_GST_02.raw
	High	EVVEAVTVVETPPMVIVGIVGYVQTPR	Unambiguous	2	2	NP_001080341.1;XP_018116701.1		CID	1	0	1	1	35.56	0.00177902	0	5.46336	0	3	961.197	2881.58	0.256167	125.082	14634	14634	MS2	19/262	170306_chiba_GST_02.raw
	High	FIDTTSK	Unambiguous	6	2	NP_001080341.1;XP_018116701.1		CID	1	0	1	1	35.09	0.00184296	0	8.72094	0	2	406.214	811.42	0.254003	44.5871	2979	2979	MS2	6/54	170306_chiba_GST_02.raw
	High	YCQVIR	Unambiguous	2	2	NP_001080341.1;XP_018116701.1		CID	1	0	1	1	33.41	0.00435515	0	21.9196	0	2	391.205	781.402	-0.27001	46.5127	3301	3301	MS2	5/48	170306_chiba_GST_02.raw
	High	EVVEAVTVVETPPMVIVGIVGYVQTPR	Unambiguous	2	2	NP_001080341.1;XP_018116701.1		CID	1	0	1	1	33.41	0.00287303	0	10.8224	1	3	961.197	2881.58	0.573885	132.269	15559	15559	MS2	17/262	170306_chiba_GST_02.raw
	High	EVVEAVTVVETPPMVIVGIVGYVQTPR	Unambiguous	2	2	NP_001080341.1;XP_018116701.1		CID	1	0	1	1	33.28	0.00277238	0	13.2738	3	3	961.197	2881.58	0.764515	138.105	16293	16293	MS2	25/262	170306_chiba_GST_02.raw
	High	EVVEAVTVVETPPMVIVGIVGYVQTPR	Unambiguous	2	2	NP_001080341.1;XP_018116701.1		CID	1	0	1	1	33.16	0.00304327	0	24.8053	1	3	961.197	2881.58	0.446798	132.933	15643	15643	MS2	20/262	170306_chiba_GST_02.raw
	High	EVVEAVTVVETPPMVIVGIVGYVQTPR	Unambiguous	2	2	NP_001080341.1;XP_018116701.1		CID	1	0	1	1	33.09	0.00311727	0	12.1037	1	3	961.196	2881.57	-0.0615506	133.749	15747	15747	MS2	17/262	170306_chiba_GST_02.raw
	High	EVVEAVTVVETPPMVIVGIVGYVQTPR	Unambiguous	2	2	NP_001080341.1;XP_018116701.1		CID	1	0	1	1	32.84	0.00327597	0	78.1541	2	3	961.197	2881.58	0.383254	141.631	16734	16734	MS2	16/262	170306_chiba_GST_02.raw
	High	EVVEAVTVVETPPMVIVGIVGYVQTPR	Unambiguous	2	2	NP_001080341.1;XP_018116701.1		CID	1	0	1	1	32.61	0.00348156	0	4.9614	2	3	961.196	2881.57	0.12908	136.231	16062	16062	MS2	16/262	170306_chiba_GST_02.raw
	High	EVVEAVTVVETPPMVIVGIVGYVQTPR	Unambiguous	2	2	NP_001080341.1;XP_018116701.1		CID	1	0	1	1	32.2	0.00385638	0	11.0719	34	2	1441.29	2881.58	0.345558	133.707	15742	15742	MS2	11/262	170306_chiba_GST_02.raw
	High	EVVEAVTVVETPPMVIVGIVGYVQTPR	Unambiguous	2	2	NP_001080341.1;XP_018116701.1		CID	1	0	1	1	31.87	0.00416083	0	7.01638	1	3	961.197	2881.58	0.319711	131.419	15453	15453	MS2	17/262	170306_chiba_GST_02.raw
	High	EVVEAVTVVETPPMVIVGIVGYVQTPR	Unambiguous	2	2	NP_001080341.1;XP_018116701.1		CID	1	0	1	1	31.59	0.00412588	0	22.0436	10	2	1441.29	2881.58	1.95532	132.628	15605	15605	MS2	20/262	170306_chiba_GST_02.raw
	High	SHLMEIQVNGGTIAEK	Unambiguous	2	2	NP_001080341.1;XP_018116701.1		CID	1	0	1	1	31.44	0.00933133	0	45.1173	1	3	576.298	1726.88	-0.084984	58.3699	5193	5193	MS2	15/166	170306_chiba_GST_02.raw
	High	AFMGPLK	Unambiguous	2	2	NP_001080341.1;XP_018116701.1		CID	1	0	1	1	30.71	0.00284475	0	17.108	0	2	382.212	763.417	-0.319071	55.895	4804	4804	MS2	9/50	170306_chiba_GST_02.raw
	High	LEQQVVIGGVFGQDEMIDVIGVTK	Unambiguous	1	1	NP_001080341.1		CID	1	0	1	1	29.99	0.0110755	0	53.3748	10	3	858.787	2574.35	-0.603384	118.014	13705	13705	MS2	20/268	170306_chiba_GST_02.raw
	High	EVVEAVTVVETPPMVIVGIVGYVQTPR	Unambiguous	2	2	NP_001080341.1;XP_018116701.1		CID	1	0	1	1	28.96	0.00800462	0	8.48195	1	3	961.197	2881.58	0.573885	128.137	15033	15033	MS2	31/262	170306_chiba_GST_02.raw
	High	EVVEAVTVVETPPMVIVGIVGYVQTPR	Unambiguous	2	2	NP_001080341.1;XP_018116701.1		CID	1	0	1	1	28.59	0.00816304	0	42.2215	100	3	961.197	2881.58	0.764515	147.936	17435	17435	MS2	20/262	170306_chiba_GST_02.raw
	High	KWQDEDGKK	Unambiguous	1	1	NP_001080341.1		CID	1	0	1	1	28.55	0.0312088	2	12.1599	1	2	567.283	1133.56	0.7715	41.3736	2440	2440	MS2	5/84	170306_chiba_GST_02.raw
	High	SINPLGGFVHYGEVK	Unambiguous	2	2	NP_001080341.1;XP_018116701.1		CID	1	0	1	1	28.54	0.0146957	0	6.0188	0	3	539.62	1616.84	0.486106	78.7453	8292	8292	MS2	12/160	170306_chiba_GST_02.raw
NP_001083630.1	ribosomal protein, large, P1 L homeolog [Xenopus laevis]	3414.14	79.65	1	1	4	107	113	11.4366	4.28467
	Confidence Level	Sequence	PSM Ambiguity	# Proteins	# Protein Groups	Protein Group Accessions	Modifications	Activation Type	ΔScore	ΔCn	Rank	Search Engine Rank	IonScore	Exp Value	# Missed Cleavages	Isolation Interference [%]	Ion Inject Time [ms]	Charge	m/z [Da]	MH+ [Da]	ΔM [ppm]	RT [min]	First Scan	Last Scan	MS Order	Ions Matched	Spectrum File
	High	aSVSELACIYSALILHDDEVSITEDK	Unambiguous	2	2	NP_001083630.1;NP_001089441.1	N-Term(Acetyl)	CID	1	0	1	1	106.24	3.07801e-10	0	4.17475	1	3	955.136	2863.39	0.729467	132.262	15558	15558	MS2	14/246	170306_chiba_GST_02.raw
	High	aSVSELACIYSALILHDDEVSITEDK	Unambiguous	2	2	NP_001083630.1;NP_001089441.1	N-Term(Acetyl)	CID	1	0	1	1	105.64	3.49309e-10	0	9.75601	10	2	1432.2	2863.4	2.31152	135.627	15985	15985	MS2	21/246	170306_chiba_GST_02.raw
	High	aSVSELACIYSALILHDDEVSITEDK	Unambiguous	2	2	NP_001083630.1;NP_001089441.1	N-Term(Acetyl)	CID	1	0	1	1	97.5	2.12504e-09	0	1.39595	1	2	1432.2	2863.39	1.03258	133.095	15664	15664	MS2	21/246	170306_chiba_GST_02.raw
	High	aSVSELACIYSALILHDDEVSITEDK	Unambiguous	2	2	NP_001083630.1;NP_001089441.1	N-Term(Acetyl)	CID	1	0	1	1	95.48	3.63834e-09	0	10.6198	2	2	1432.2	2863.39	0.691531	132.283	15561	15561	MS2	23/246	170306_chiba_GST_02.raw
	High	aSVSELACIYSALILHDDEVSITEDK	Unambiguous	2	2	NP_001083630.1;NP_001089441.1	N-Term(Acetyl)	CID	1	0	1	1	95.33	3.94205e-09	0	11.8579	12	2	1432.2	2863.39	0.606269	136.8	16132	16132	MS2	23/246	170306_chiba_GST_02.raw
	High	aSVSELACIYSALILHDDEVSITEDK	Unambiguous	2	2	NP_001083630.1;NP_001089441.1	N-Term(Acetyl)	CID	1	0	1	1	91.76	8.96855e-09	0	0.79391	0	3	955.136	2863.39	0.601573	133.088	15663	15663	MS2	24/246	170306_chiba_GST_02.raw
	High	aSVSELACIYSALILHDDEVSITEDKISTLIK	Unambiguous	2	2	NP_001083630.1;NP_001089441.1	N-Term(Acetyl)	CID	1	0	1	1	88.52	1.63805e-08	1	11.1192	7	3	1173.61	3518.82	0.39992	134.106	15792	15792	MS2	31/314	170306_chiba_GST_02.raw
	High	aSVSELACIYSALILHDDEVSITEDK	Unambiguous	2	2	NP_001083630.1;NP_001089441.1	N-Term(Acetyl)	CID	1	0	1	1	85.7	3.45862e-08	0	1.72227	3	2	1432.2	2863.39	0.691531	133.929	15770	15770	MS2	14/246	170306_chiba_GST_02.raw
	High	ALANINIGSLISNVGAGGGAPAAGGAAPAAASAGGAAQAEEK	Unambiguous	1	1	NP_001083630.1		CID	1	0	1	1	82.36	6.50456e-08	0	4.09972	0	3	1191.95	3573.83	0.605722	89.3175	9806	9806	MS2	29/468	170306_chiba_GST_02.raw
	High	aSVSELACIYSALILHDDEVSITEDK	Unambiguous	2	2	NP_001083630.1;NP_001089441.1	N-Term(Acetyl)	CID	1	0	1	1	82.12	7.82547e-08	0	14.363	8	2	1432.2	2863.39	0.435744	142.358	16827	16827	MS2	23/246	170306_chiba_GST_02.raw
	High	aSVSELACIYSALILHDDEVSITEDK	Unambiguous	2	2	NP_001083630.1;NP_001089441.1	N-Term(Acetyl)	CID	1	0	1	1	79.35	1.48085e-07	0	1.06127	2	3	955.136	2863.39	0.409732	134.752	15873	15873	MS2	24/246	170306_chiba_GST_02.raw
	High	aSVSELACIYSALILHDDEVSITEDKISTLIK	Unambiguous	2	2	NP_001083630.1;NP_001089441.1	N-Term(Acetyl)	CID	1	0	1	1	78.83	1.40737e-07	1	9.88232	13	3	1173.61	3518.82	1.12842	134.31	15817	15817	MS2	29/314	170306_chiba_GST_02.raw
	High	TAGVTVEPFWPSLFAK	Unambiguous	2	2	NP_001083630.1;NP_001089441.1		CID	1	0	1	1	73.91	6.38116e-07	0	12.4571	1	2	875.465	1749.92	0.457905	107.961	12371	12371	MS2	8/142	170306_chiba_GST_02.raw
	High	ALANINIGSLISNVGAGGGAPAAGGAAPAAASAGGAAQAEEK	Unambiguous	1	1	NP_001083630.1		CID	1	0	1	1	72.92	5.61555e-07	0	10.6787	1	3	1191.95	3573.83	0.0933711	90.0182	9904	9904	MS2	27/468	170306_chiba_GST_02.raw
	High	aSVSELACIYSALILHDDEVSITEDK	Unambiguous	2	2	NP_001083630.1;NP_001089441.1	N-Term(Acetyl)	CID	1	0	1	1	71.22	1.0156e-06	0	3.98791	1	3	955.136	2863.39	0.537626	133.914	15768	15768	MS2	12/246	170306_chiba_GST_02.raw
	High	aSVSELACIYSALILHDDEVSITEDK	Unambiguous	2	2	NP_001083630.1;NP_001089441.1	N-Term(Acetyl)	CID	1	0	1	1	71.15	1.0321e-06	0	15.954	4	3	955.136	2863.39	0.601573	136.406	16083	16083	MS2	14/246	170306_chiba_GST_02.raw
	High	aSVSELACIYSALILHDDEVSITEDK	Unambiguous	2	2	NP_001083630.1;NP_001089441.1	N-Term(Acetyl)	CID	1	0	1	1	69.19	1.47617e-06	0	0	28	2	1432.2	2863.4	1.11784	137.541	16223	16223	MS2	20/246	170306_chiba_GST_02.raw
	High	aSVSELACIYSALILHDDEVSITEDK	Unambiguous	2	2	NP_001083630.1;NP_001089441.1	N-Term(Acetyl)	CID	1	0	1	1	65.53	3.76463e-06	0	5.39509	16	2	1432.2	2863.39	0.606269	135.464	15964	15964	MS2	24/246	170306_chiba_GST_02.raw
	High	TAGVTVEPFWPSLFAK	Unambiguous	2	2	NP_001083630.1;NP_001089441.1		CID	1	0	1	1	63.14	7.86167e-06	0	4.31266	0	2	875.464	1749.92	-0.0303976	104.872	11946	11946	MS2	7/142	170306_chiba_GST_02.raw
	High	TAGVTVEPFWPSLFAK	Unambiguous	2	2	NP_001083630.1;NP_001089441.1		CID	1	0	1	1	63.01	8.10056e-06	0	3.41033	0	2	875.464	1749.92	0.03936	106.404	12156	12156	MS2	7/142	170306_chiba_GST_02.raw
	High	TAGVTVEPFWPSLFAK	Unambiguous	2	2	NP_001083630.1;NP_001089441.1		CID	1	0	1	1	61.76	1.05355e-05	0	3.96783	0	2	875.464	1749.92	0.31839	105.633	12051	12051	MS2	7/142	170306_chiba_GST_02.raw
	High	TAGVTVEPFWPSLFAK	Unambiguous	2	2	NP_001083630.1;NP_001089441.1		CID	1	0	1	1	61.46	8.50251e-06	0	36.1036	13	2	875.465	1749.92	0.946208	133.96	15774	15774	MS2	7/142	170306_chiba_GST_02.raw
	High	TAGVTVEPFWPSLFAK	Unambiguous	2	2	NP_001083630.1;NP_001089441.1		CID	1	0	1	1	59.45	1.35066e-05	0	7.10622	17	2	875.465	1749.92	0.806693	141.21	16682	16682	MS2	10/142	170306_chiba_GST_02.raw
	High	aSVSELACIYSALILHDDEVSITEDK	Unambiguous	2	2	NP_001083630.1;NP_001089441.1	N-Term(Acetyl)	CID	1	0	1	1	55.13	4.12783e-05	0	8.39689	7	3	955.136	2863.39	0.537626	138.953	16399	16399	MS2	12/246	170306_chiba_GST_02.raw
	High	TAGVTVEPFWPSLFAK	Unambiguous	2	2	NP_001083630.1;NP_001089441.1		CID	1	0	1	1	53.81	6.5298e-05	0	25.8402	17	2	875.465	1749.92	0.388148	142.099	16794	16794	MS2	7/142	170306_chiba_GST_02.raw
	High	TAGVTVEPFWPSLFAK	Unambiguous	2	2	NP_001083630.1;NP_001089441.1		CID	1	0	1	1	53.79	6.03765e-05	0	26.3732	5	2	875.465	1749.92	1.08572	111.835	12889	12889	MS2	19/142	170306_chiba_GST_02.raw
	High	TAGVTVEPFWPSLFAK	Unambiguous	2	2	NP_001083630.1;NP_001089441.1		CID	1	0	1	1	53.38	7.20941e-05	0	24.801	5	2	875.465	1749.92	0.59742	123.407	14413	14413	MS2	7/142	170306_chiba_GST_02.raw
	High	aSVSELACIYSALILHDDEVSITEDK	Unambiguous	2	2	NP_001083630.1;NP_001089441.1	N-Term(Acetyl)	CID	1	0	1	1	53.37	5.86827e-05	0	10.3611	6	3	955.136	2863.39	0.409732	138.113	16294	16294	MS2	11/246	170306_chiba_GST_02.raw
	High	aSVSELACIYSALILHDDEVSITEDK	Unambiguous	2	2	NP_001083630.1;NP_001089441.1	N-Term(Acetyl)	CID	1	0	1	1	52.52	6.82904e-05	0	7.39267	7	3	955.135	2863.39	-0.101844	137.611	16231	16231	MS2	17/246	170306_chiba_GST_02.raw
	High	TAGVTVEPFWPSLFAK	Unambiguous	2	2	NP_001083630.1;NP_001089441.1		CID	1	0	1	1	51.42	0.0001042	0	38.6689	23	2	875.465	1749.92	1.08572	139.551	16475	16475	MS2	18/142	170306_chiba_GST_02.raw
	High	TAGVTVEPFWPSLFAK	Unambiguous	2	2	NP_001083630.1;NP_001089441.1		CID	1	0	1	1	50.99	0.000124997	0	30.1535	7	2	875.465	1749.92	0.388148	116.222	13470	13470	MS2	14/142	170306_chiba_GST_02.raw
	High	TAGVTVEPFWPSLFAK	Unambiguous	2	2	NP_001083630.1;NP_001089441.1		CID	1	0	1	1	50.81	9.87522e-05	0	15.0927	9	2	875.465	1749.92	0.806693	123.768	14462	14462	MS2	14/142	170306_chiba_GST_02.raw
	High	TAGVTVEPFWPSLFAK	Unambiguous	2	2	NP_001083630.1;NP_001089441.1		CID	1	0	1	1	50.69	0.000133937	0	22.856	6	2	875.465	1749.92	0.527663	118.81	13809	13809	MS2	18/142	170306_chiba_GST_02.raw
	High	TAGVTVEPFWPSLFAK	Unambiguous	2	2	NP_001083630.1;NP_001089441.1		CID	1	0	1	1	49.46	0.000163066	0	29.274	17	2	875.465	1749.92	1.15548	124.996	14623	14623	MS2	18/142	170306_chiba_GST_02.raw
	High	TAGVTVEPFWPSLFAK	Unambiguous	2	2	NP_001083630.1;NP_001089441.1		CID	1	0	1	1	49.13	0.000191823	0	22.8267	19	2	875.465	1749.92	0.59742	134.195	15803	15803	MS2	16/142	170306_chiba_GST_02.raw
	High	TAGVTVEPFWPSLFAK	Unambiguous	2	2	NP_001083630.1;NP_001089441.1		CID	1	0	1	1	49.04	0.000179623	0	7.49151	11	2	875.465	1749.92	1.295	119.72	13930	13930	MS2	16/142	170306_chiba_GST_02.raw
	High	aSVSELACIYSALILHDDEVSITEDK	Unambiguous	2	2	NP_001083630.1;NP_001089441.1	N-Term(Acetyl)	CID	1	0	1	1	48.8	0.000170714	0	7.62714	10	3	955.137	2863.4	1.36894	138.667	16363	16363	MS2	21/246	170306_chiba_GST_02.raw
	High	aSVSELACIYSALILHDDEVSITEDK	Unambiguous	2	2	NP_001083630.1;NP_001089441.1	N-Term(Acetyl)	CID	1	0	1	1	48.33	0.000187288	0	13.215	6	3	955.136	2863.39	0.153944	137.268	16189	16189	MS2	13/246	170306_chiba_GST_02.raw
	High	TAGVTVEPFWPSLFAK	Unambiguous	2	2	NP_001083630.1;NP_001089441.1		CID	1	0	1	1	48.11	0.000242605	0	11.2803	1	2	875.465	1749.92	0.527663	107.186	12264	12264	MS2	9/142	170306_chiba_GST_02.raw
	High	TAGVTVEPFWPSLFAK	Unambiguous	2	2	NP_001083630.1;NP_001089441.1		CID	1	0	1	1	47.78	0.000198402	0	23.5047	6	2	875.465	1749.92	0.806693	121.297	14138	14138	MS2	19/142	170306_chiba_GST_02.raw
	High	TAGVTVEPFWPSLFAK	Unambiguous	2	2	NP_001083630.1;NP_001089441.1		CID	1	0	1	1	47.58	0.000274094	0	41.941	13	2	875.465	1749.92	0.388148	132.653	15608	15608	MS2	13/142	170306_chiba_GST_02.raw
	High	TAGVTVEPFWPSLFAK	Unambiguous	2	2	NP_001083630.1;NP_001089441.1		CID	1	0	1	1	47.22	0.000297783	0	29.8472	25	2	875.465	1749.92	0.388148	137.338	16198	16198	MS2	7/142	170306_chiba_GST_02.raw
	High	TAGVTVEPFWPSLFAK	Unambiguous	2	2	NP_001083630.1;NP_001089441.1		CID	1	0	1	1	46.7	0.000238383	0	27.0921	13	2	875.465	1749.92	0.736936	119.31	13876	13876	MS2	9/142	170306_chiba_GST_02.raw
	High	TAGVTVEPFWPSLFAK	Unambiguous	2	2	NP_001083630.1;NP_001089441.1		CID	1	0	1	1	46.57	0.000356874	0	14.0698	5	2	875.464	1749.92	-0.239671	113.888	13161	13161	MS2	13/142	170306_chiba_GST_02.raw
	High	TAGVTVEPFWPSLFAK	Unambiguous	2	2	NP_001083630.1;NP_001089441.1		CID	1	0	1	1	46.52	0.00026407	0	43.2357	9	2	875.465	1749.92	1.01597	120.733	14064	14064	MS2	9/142	170306_chiba_GST_02.raw
	High	TAGVTVEPFWPSLFAK	Unambiguous	2	2	NP_001083630.1;NP_001089441.1		CID	1	0	1	1	46.28	0.000262588	0	49.6197	5	2	875.465	1749.92	0.736936	116.671	13529	13529	MS2	9/142	170306_chiba_GST_02.raw
	High	aSVSELACIYSALILHDDEVSITEDK	Unambiguous	2	2	NP_001083630.1;NP_001089441.1	N-Term(Acetyl)	CID	1	0	1	1	44.97	0.00037892	0	26.6324	73	3	955.137	2863.4	1.1771	146.215	17266	17266	MS2	13/246	170306_chiba_GST_02.raw
	High	aSVSELACIYSALILHDDEVSITEDK	Unambiguous	2	2	NP_001083630.1;NP_001089441.1	N-Term(Acetyl)	CID	1	0	1	1	44.83	0.000406132	0	1.90754	3	3	955.136	2863.39	0.857361	135.575	15978	15978	MS2	23/246	170306_chiba_GST_02.raw
	High	TAGVTVEPFWPSLFAK	Unambiguous	2	2	NP_001083630.1;NP_001089441.1		CID	1	0	1	1	44.21	0.00061449	0	23.6939	5	2	875.464	1749.92	0.248633	113.353	13091	13091	MS2	13/142	170306_chiba_GST_02.raw
	High	TAGVTVEPFWPSLFAK	Unambiguous	2	2	NP_001083630.1;NP_001089441.1		CID	1	0	1	1	43.84	0.000460548	0	19.0693	5	2	875.465	1749.92	0.736936	115.105	13323	13323	MS2	13/142	170306_chiba_GST_02.raw
	High	TAGVTVEPFWPSLFAK	Unambiguous	2	2	NP_001083630.1;NP_001089441.1		CID	1	0	1	1	43.63	0.000702288	0	12.602	100	2	875.464	1749.92	-0.169913	149.432	17558	17558	MS2	15/142	170306_chiba_GST_02.raw
	High	TAGVTVEPFWPSLFAK	Unambiguous	2	2	NP_001083630.1;NP_001089441.1		CID	1	0	1	1	43.39	0.000627654	0	50.3032	14	2	875.466	1749.92	1.71354	127.477	14947	14947	MS2	13/142	170306_chiba_GST_02.raw
	High	TAGVTVEPFWPSLFAK	Unambiguous	2	2	NP_001083630.1;NP_001089441.1		CID	1	0	1	1	43.38	0.000512006	0	29.1068	5	2	875.465	1749.92	0.736936	112.142	12930	12930	MS2	9/142	170306_chiba_GST_02.raw
	High	TAGVTVEPFWPSLFAK	Unambiguous	2	2	NP_001083630.1;NP_001089441.1		CID	1	0	1	1	43.37	0.000722603	0	12.9308	10	2	875.465	1749.92	0.457905	123.258	14394	14394	MS2	9/142	170306_chiba_GST_02.raw
	High	TAGVTVEPFWPSLFAK	Unambiguous	2	2	NP_001083630.1;NP_001089441.1		CID	1	0	1	1	43.3	0.000673539	0	27.2453	4	2	875.465	1749.92	1.36475	111.98	12908	12908	MS2	15/142	170306_chiba_GST_02.raw
	High	TAGVTVEPFWPSLFAK	Unambiguous	2	2	NP_001083630.1;NP_001089441.1		CID	1	0	1	1	43.28	0.000559174	0	28.976	6	2	875.465	1749.92	0.946208	111.645	12864	12864	MS2	9/142	170306_chiba_GST_02.raw
	High	TAGVTVEPFWPSLFAK	Unambiguous	2	2	NP_001083630.1;NP_001089441.1		CID	1	0	1	1	43.28	0.000676648	0	28.0372	9	2	875.465	1749.92	1.36475	114.997	13309	13309	MS2	9/142	170306_chiba_GST_02.raw
	High	TAGVTVEPFWPSLFAK	Unambiguous	2	2	NP_001083630.1;NP_001089441.1		CID	1	0	1	1	43.27	0.000739434	0	7.14967	17	2	875.465	1749.92	0.457905	124.257	14526	14526	MS2	9/142	170306_chiba_GST_02.raw
	High	TAGVTVEPFWPSLFAK	Unambiguous	2	2	NP_001083630.1;NP_001089441.1		CID	1	0	1	1	42.95	0.000600784	0	17.8215	2	2	875.465	1749.92	1.01597	111.35	12825	12825	MS2	6/142	170306_chiba_GST_02.raw
	High	aSVSELACIYSALILHDDEVSITEDK	Unambiguous	2	2	NP_001083630.1;NP_001089441.1	N-Term(Acetyl)	CID	1	0	1	1	42.54	0.000732699	0	12.368	10	3	955.137	2863.4	1.81656	139.969	16527	16527	MS2	16/246	170306_chiba_GST_02.raw
	High	TAGVTVEPFWPSLFAK	Unambiguous	2	2	NP_001083630.1;NP_001089441.1		CID	1	0	1	1	42.51	0.000625568	0	32.2706	7	2	875.465	1749.92	0.736936	116.115	13456	13456	MS2	13/142	170306_chiba_GST_02.raw
	High	TAGVTVEPFWPSLFAK	Unambiguous	2	2	NP_001083630.1;NP_001089441.1		CID	1	0	1	1	42.36	0.000940838	0	28.592	18	2	875.464	1749.92	-0.169913	141.749	16749	16749	MS2	17/142	170306_chiba_GST_02.raw
	High	aSVSELACIYSALILHDDEVSITEDK	Unambiguous	2	2	NP_001083630.1;NP_001089441.1	N-Term(Acetyl)	CID	1	0	1	1	42.05	0.000807737	0	9.71072	10	3	955.135	2863.39	-0.357633	138.834	16384	16384	MS2	13/246	170306_chiba_GST_02.raw
	High	TAGVTVEPFWPSLFAK	Unambiguous	2	2	NP_001083630.1;NP_001089441.1		CID	1	0	1	1	41.98	0.00100151	0	38.9144	100	2	875.464	1749.92	0.31839	150.105	17614	17614	MS2	6/142	170306_chiba_GST_02.raw
	High	TAGVTVEPFWPSLFAK	Unambiguous	2	2	NP_001083630.1;NP_001089441.1		CID	1	0	1	1	41.88	0.00102484	0	0	14	2	875.464	1749.92	0.31839	132.987	15650	15650	MS2	17/142	170306_chiba_GST_02.raw
	High	TAGVTVEPFWPSLFAK	Unambiguous	2	2	NP_001083630.1;NP_001089441.1		CID	1	0	1	1	41.86	0.000775438	0	43.3106	12	2	875.465	1749.92	0.946208	116.594	13519	13519	MS2	17/142	170306_chiba_GST_02.raw
	High	TAGVTVEPFWPSLFAK	Unambiguous	2	2	NP_001083630.1;NP_001089441.1		CID	1	0	1	1	41.83	0.00094813	0	29.4111	7	2	875.465	1749.92	1.08572	115.935	13432	13432	MS2	15/142	170306_chiba_GST_02.raw
	High	TAGVTVEPFWPSLFAK	Unambiguous	2	2	NP_001083630.1;NP_001089441.1		CID	1	0	1	1	41.72	0.000750369	0	24.0738	19	2	875.465	1749.92	0.667178	141.498	16718	16718	MS2	17/142	170306_chiba_GST_02.raw
	High	TAGVTVEPFWPSLFAK	Unambiguous	2	2	NP_001083630.1;NP_001089441.1		CID	1	0	1	1	41.68	0.00106635	0	42.938	4	2	875.465	1749.92	0.527663	117.321	13615	13615	MS2	17/142	170306_chiba_GST_02.raw
	High	TAGVTVEPFWPSLFAK	Unambiguous	2	2	NP_001083630.1;NP_001089441.1		CID	1	0	1	1	41.33	0.000820871	0	33.3883	9	2	875.465	1749.92	0.667178	122.916	14350	14350	MS2	15/142	170306_chiba_GST_02.raw
	High	TAGVTVEPFWPSLFAK	Unambiguous	2	2	NP_001083630.1;NP_001089441.1		CID	1	0	1	1	41.26	0.00107736	0	30.8809	17	2	875.465	1749.92	1.22524	130.687	15362	15362	MS2	17/142	170306_chiba_GST_02.raw
	High	TAGVTVEPFWPSLFAK	Unambiguous	2	2	NP_001083630.1;NP_001089441.1		CID	1	0	1	1	41.18	0.000906874	0	31.0476	6	2	875.465	1749.92	0.876451	116.402	13494	13494	MS2	15/142	170306_chiba_GST_02.raw
	High	TAGVTVEPFWPSLFAK	Unambiguous	2	2	NP_001083630.1;NP_001089441.1		CID	1	0	1	1	41.02	0.00124137	0	46.6331	11	2	875.465	1749.92	0.59742	128.042	15021	15021	MS2	15/142	170306_chiba_GST_02.raw
	High	TAGVTVEPFWPSLFAK	Unambiguous	2	2	NP_001083630.1;NP_001089441.1		CID	1	0	1	1	40.72	0.00137251	0	22.07	5	2	875.464	1749.92	0.178875	111.175	12802	12802	MS2	17/142	170306_chiba_GST_02.raw
	High	aSVSELACIYSALILHDDEVSITEDK	Unambiguous	2	2	NP_001083630.1;NP_001089441.1	N-Term(Acetyl)	CID	1	0	1	1	40.25	0.00112815	0	18.4267	13	3	955.135	2863.39	-0.933157	139.676	16491	16491	MS2	13/246	170306_chiba_GST_02.raw
	High	TAGVTVEPFWPSLFAK	Unambiguous	2	2	NP_001083630.1;NP_001089441.1		CID	1	0	1	1	40.17	0.00130298	0	9.87894	6	2	875.466	1749.93	2.55063	120.072	13976	13976	MS2	15/142	170306_chiba_GST_02.raw
	High	TAGVTVEPFWPSLFAK	Unambiguous	2	2	NP_001083630.1;NP_001089441.1		CID	1	0	1	1	40	0.00162	0	22.0756	100	2	875.464	1749.92	-0.0303976	148.309	17466	17466	MS2	14/142	170306_chiba_GST_02.raw
	High	TAGVTVEPFWPSLFAK	Unambiguous	2	2	NP_001083630.1;NP_001089441.1		CID	1	0	1	1	39.24	0.00132823	0	37.1681	31	2	875.465	1749.92	0.736936	135.228	15933	15933	MS2	17/142	170306_chiba_GST_02.raw
	High	TAGVTVEPFWPSLFAK	Unambiguous	2	2	NP_001083630.1;NP_001089441.1		CID	1	0	1	1	38.99	0.00204416	0	42.2157	31	2	875.464	1749.92	0.109118	131.744	15493	15493	MS2	15/142	170306_chiba_GST_02.raw
	High	TAGVTVEPFWPSLFAK	Unambiguous	2	2	NP_001083630.1;NP_001089441.1		CID	1	0	1	1	38.97	0.00183176	0	14.6364	8	2	875.465	1749.92	1.08572	114.786	13280	13280	MS2	15/142	170306_chiba_GST_02.raw
	High	TAGVTVEPFWPSLFAK	Unambiguous	2	2	NP_001083630.1;NP_001089441.1		CID	1	0	1	1	38.93	0.00151607	0	45.1871	47	2	875.465	1749.92	1.01597	140.944	16648	16648	MS2	15/142	170306_chiba_GST_02.raw
	High	TAGVTVEPFWPSLFAK	Unambiguous	2	2	NP_001083630.1;NP_001089441.1		CID	1	0	1	1	38.88	0.00203189	0	0	100	2	875.465	1749.92	0.527663	150.949	17689	17689	MS2	15/142	170306_chiba_GST_02.raw
	High	TAGVTVEPFWPSLFAK	Unambiguous	2	2	NP_001083630.1;NP_001089441.1		CID	1	0	1	1	38.39	0.00227457	0	23.5747	6	2	875.465	1749.92	0.59742	118.104	13716	13716	MS2	16/142	170306_chiba_GST_02.raw
	High	TAGVTVEPFWPSLFAK	Unambiguous	2	2	NP_001083630.1;NP_001089441.1		CID	1	0	1	1	38.11	0.00250331	0	25.2149	9	2	875.464	1749.92	0.248633	124.082	14503	14503	MS2	14/142	170306_chiba_GST_02.raw
	High	TAGVTVEPFWPSLFAK	Unambiguous	2	2	NP_001083630.1;NP_001089441.1		CID	1	0	1	1	38.03	0.00254985	0	37.762	15	2	875.464	1749.92	0.248633	122.161	14250	14250	MS2	15/142	170306_chiba_GST_02.raw
	High	TAGVTVEPFWPSLFAK	Unambiguous	2	2	NP_001083630.1;NP_001089441.1		CID	1	0	1	1	37.59	0.00282173	0	23.3424	11	2	875.464	1749.92	-0.100155	135.481	15966	15966	MS2	14/142	170306_chiba_GST_02.raw
	High	TAGVTVEPFWPSLFAK	Unambiguous	2	2	NP_001083630.1;NP_001089441.1		CID	1	0	1	1	37.37	0.00263853	0	17.0778	9	2	875.465	1749.92	1.15548	114.529	13246	13246	MS2	9/142	170306_chiba_GST_02.raw
	High	TAGVTVEPFWPSLFAK	Unambiguous	2	2	NP_001083630.1;NP_001089441.1		CID	1	0	1	1	36.95	0.00316884	0	32.7631	22	2	875.465	1749.92	0.457905	128.541	15085	15085	MS2	16/142	170306_chiba_GST_02.raw
	High	TAGVTVEPFWPSLFAK	Unambiguous	2	2	NP_001083630.1;NP_001089441.1		CID	1	0	1	1	36.95	0.00225048	0	25.4436	6	2	875.465	1749.92	0.667178	111.015	12781	12781	MS2	16/142	170306_chiba_GST_02.raw
	High	TAGVTVEPFWPSLFAK	Unambiguous	2	2	NP_001083630.1;NP_001089441.1		CID	1	0	1	1	36.51	0.00361839	0	30.4476	22	2	875.464	1749.92	-0.0303976	137.198	16181	16181	MS2	14/142	170306_chiba_GST_02.raw
	High	TAGVTVEPFWPSLFAK	Unambiguous	2	2	NP_001083630.1;NP_001089441.1		CID	1	0	1	1	36.39	0.00360495	0	80.2612	27	2	875.465	1749.92	0.527663	144.005	17036	17036	MS2	14/142	170306_chiba_GST_02.raw
	High	TAGVTVEPFWPSLFAK	Unambiguous	2	2	NP_001083630.1;NP_001089441.1		CID	1	0	1	1	36.18	0.00348231	0	22.2274	100	2	875.465	1749.92	1.08572	148.865	17513	17513	MS2	14/142	170306_chiba_GST_02.raw
	High	TAGVTVEPFWPSLFAK	Unambiguous	2	2	NP_001083630.1;NP_001089441.1		CID	1	0	1	1	36.18	0.00328952	0	0	68	2	875.466	1749.92	1.50427	146.569	17297	17297	MS2	7/142	170306_chiba_GST_02.raw
	High	TAGVTVEPFWPSLFAK	Unambiguous	2	2	NP_001083630.1;NP_001089441.1		CID	1	0	1	1	36.14	0.00288216	0	21.7616	8	2	875.465	1749.92	1.01597	123.102	14374	14374	MS2	8/142	170306_chiba_GST_02.raw
	High	TAGVTVEPFWPSLFAK	Unambiguous	2	2	NP_001083630.1;NP_001089441.1		CID	1	0	1	1	35.97	0.003971	0	23.1757	1	3	583.979	1749.92	0.450221	105.064	11973	11973	MS2	15/142	170306_chiba_GST_02.raw
	High	aSVSELACIYSALILHDDEVSITEDK	Unambiguous	2	2	NP_001083630.1;NP_001089441.1	N-Term(Acetyl)	CID	1	0	1	1	35.59	0.00350593	0	9.14074	13	3	955.135	2863.39	-0.0378973	139.147	16424	16424	MS2	10/246	170306_chiba_GST_02.raw
	High	TAGVTVEPFWPSLFAK	Unambiguous	2	2	NP_001083630.1;NP_001089441.1		CID	1	0	1	1	35.09	0.00368593	0	37.5353	21	2	875.465	1749.92	0.876451	143.878	17020	17020	MS2	16/142	170306_chiba_GST_02.raw
	High	TAGVTVEPFWPSLFAK	Unambiguous	2	2	NP_001083630.1;NP_001089441.1		CID	1	0	1	1	34.39	0.00524038	0	11.1589	9	2	875.465	1749.92	1.36475	125.482	14688	14688	MS2	14/142	170306_chiba_GST_02.raw
	High	TAGVTVEPFWPSLFAK	Unambiguous	2	2	NP_001083630.1;NP_001089441.1		CID	1	0	1	1	34.34	0.00581644	0	40.5786	13	2	875.464	1749.92	0.31839	131.136	15418	15418	MS2	14/142	170306_chiba_GST_02.raw
	High	TAGVTVEPFWPSLFAK	Unambiguous	2	2	NP_001083630.1;NP_001089441.1		CID	1	0	1	1	34.16	0.00454693	0	55.6716	12	2	875.465	1749.92	1.01597	127.748	14982	14982	MS2	11/142	170306_chiba_GST_02.raw
	High	TAGVTVEPFWPSLFAK	Unambiguous	2	2	NP_001083630.1;NP_001089441.1		CID	1	0	1	1	33.46	0.0071229	0	14.4237	87	2	875.464	1749.92	0.31839	151.313	17723	17723	MS2	17/142	170306_chiba_GST_02.raw
	High	TAGVTVEPFWPSLFAK	Unambiguous	2	2	NP_001083630.1;NP_001089441.1		CID	1	0	1	1	33.33	0.00729289	0	60.6967	100	2	875.465	1749.92	0.59742	147.471	17392	17392	MS2	18/142	170306_chiba_GST_02.raw
	High	TAGVTVEPFWPSLFAK	Unambiguous	2	2	NP_001083630.1;NP_001089441.1		CID	1	0	1	1	33.31	0.00555325	0	73.5027	17	2	875.465	1749.92	0.876451	139.861	16514	16514	MS2	7/142	170306_chiba_GST_02.raw
	High	TAGVTVEPFWPSLFAK	Unambiguous	2	2	NP_001083630.1;NP_001089441.1		CID	1	0	1	1	33.02	0.00808193	0	53.684	23	2	875.464	1749.92	0.109118	139.368	16451	16451	MS2	15/142	170306_chiba_GST_02.raw
	High	TAGVTVEPFWPSLFAK	Unambiguous	2	2	NP_001083630.1;NP_001089441.1		CID	1	0	1	1	31.31	0.0119816	0	20.3523	97	2	875.464	1749.92	0.03936	151.691	17756	17756	MS2	10/142	170306_chiba_GST_02.raw
	High	TAGVTVEPFWPSLFAK	Unambiguous	2	2	NP_001083630.1;NP_001089441.1		CID	1	0	1	1	31.15	0.01105	0	35.4927	10	2	875.465	1749.92	1.295	126.402	14808	14808	MS2	17/142	170306_chiba_GST_02.raw
	High	TAGVTVEPFWPSLFAK	Unambiguous	2	2	NP_001083630.1;NP_001089441.1		CID	1	0	1	1	31.11	0.0106101	0	30.0531	8	2	875.466	1749.92	1.71354	120.403	14020	14020	MS2	13/142	170306_chiba_GST_02.raw
NP_001089441.1	uncharacterized protein LOC734491 [Xenopus laevis]	3406.88	79.65	1	1	4	107	113	11.4657	4.24658
	Confidence Level	Sequence	PSM Ambiguity	# Proteins	# Protein Groups	Protein Group Accessions	Modifications	Activation Type	ΔScore	ΔCn	Rank	Search Engine Rank	IonScore	Exp Value	# Missed Cleavages	Isolation Interference [%]	Ion Inject Time [ms]	Charge	m/z [Da]	MH+ [Da]	ΔM [ppm]	RT [min]	First Scan	Last Scan	MS Order	Ions Matched	Spectrum File
	High	aSVSELACIYSALILHDDEVSITEDK	Unambiguous	2	2	NP_001083630.1;NP_001089441.1	N-Term(Acetyl)	CID	1	0	1	1	106.24	3.07801e-10	0	4.17475	1	3	955.136	2863.39	0.729467	132.262	15558	15558	MS2	14/246	170306_chiba_GST_02.raw
	High	aSVSELACIYSALILHDDEVSITEDK	Unambiguous	2	2	NP_001083630.1;NP_001089441.1	N-Term(Acetyl)	CID	1	0	1	1	105.64	3.49309e-10	0	9.75601	10	2	1432.2	2863.4	2.31152	135.627	15985	15985	MS2	21/246	170306_chiba_GST_02.raw
	High	aSVSELACIYSALILHDDEVSITEDK	Unambiguous	2	2	NP_001083630.1;NP_001089441.1	N-Term(Acetyl)	CID	1	0	1	1	97.5	2.12504e-09	0	1.39595	1	2	1432.2	2863.39	1.03258	133.095	15664	15664	MS2	21/246	170306_chiba_GST_02.raw
	High	aSVSELACIYSALILHDDEVSITEDK	Unambiguous	2	2	NP_001083630.1;NP_001089441.1	N-Term(Acetyl)	CID	1	0	1	1	95.48	3.63834e-09	0	10.6198	2	2	1432.2	2863.39	0.691531	132.283	15561	15561	MS2	23/246	170306_chiba_GST_02.raw
	High	aSVSELACIYSALILHDDEVSITEDK	Unambiguous	2	2	NP_001083630.1;NP_001089441.1	N-Term(Acetyl)	CID	1	0	1	1	95.33	3.94205e-09	0	11.8579	12	2	1432.2	2863.39	0.606269	136.8	16132	16132	MS2	23/246	170306_chiba_GST_02.raw
	High	aSVSELACIYSALILHDDEVSITEDK	Unambiguous	2	2	NP_001083630.1;NP_001089441.1	N-Term(Acetyl)	CID	1	0	1	1	91.76	8.96855e-09	0	0.79391	0	3	955.136	2863.39	0.601573	133.088	15663	15663	MS2	24/246	170306_chiba_GST_02.raw
	High	aSVSELACIYSALILHDDEVSITEDKISTLIK	Unambiguous	2	2	NP_001083630.1;NP_001089441.1	N-Term(Acetyl)	CID	1	0	1	1	88.52	1.63805e-08	1	11.1192	7	3	1173.61	3518.82	0.39992	134.106	15792	15792	MS2	31/314	170306_chiba_GST_02.raw
	High	aSVSELACIYSALILHDDEVSITEDK	Unambiguous	2	2	NP_001083630.1;NP_001089441.1	N-Term(Acetyl)	CID	1	0	1	1	85.7	3.45862e-08	0	1.72227	3	2	1432.2	2863.39	0.691531	133.929	15770	15770	MS2	14/246	170306_chiba_GST_02.raw
	High	aSVSELACIYSALILHDDEVSITEDK	Unambiguous	2	2	NP_001083630.1;NP_001089441.1	N-Term(Acetyl)	CID	1	0	1	1	82.12	7.82547e-08	0	14.363	8	2	1432.2	2863.39	0.435744	142.358	16827	16827	MS2	23/246	170306_chiba_GST_02.raw
	High	aSVSELACIYSALILHDDEVSITEDK	Unambiguous	2	2	NP_001083630.1;NP_001089441.1	N-Term(Acetyl)	CID	1	0	1	1	79.35	1.48085e-07	0	1.06127	2	3	955.136	2863.39	0.409732	134.752	15873	15873	MS2	24/246	170306_chiba_GST_02.raw
	High	aSVSELACIYSALILHDDEVSITEDKISTLIK	Unambiguous	2	2	NP_001083630.1;NP_001089441.1	N-Term(Acetyl)	CID	1	0	1	1	78.83	1.40737e-07	1	9.88232	13	3	1173.61	3518.82	1.12842	134.31	15817	15817	MS2	29/314	170306_chiba_GST_02.raw
	High	ALANIDIGSLISNVGAGGGAPAAGGAAPAAASAGGAAQVEEK	Unambiguous	1	1	NP_001089441.1		CID	1	0	1	1	76.68	1.40683e-07	0	8.72837	0	3	1201.62	3602.84	0.685499	89.925	9891	9891	MS2	31/474	170306_chiba_GST_02.raw
	High	TAGVTVEPFWPSLFAK	Unambiguous	2	2	NP_001083630.1;NP_001089441.1		CID	1	0	1	1	73.91	6.38116e-07	0	12.4571	1	2	875.465	1749.92	0.457905	107.961	12371	12371	MS2	8/142	170306_chiba_GST_02.raw
	High	ALANIDIGSLISNVGAGGGAPAAGGAAPAAASAGGAAQVEEK	Unambiguous	1	1	NP_001089441.1		CID	1	0	1	1	71.34	4.84779e-07	0	7.16707	1	3	1201.62	3602.84	0.482209	91.0658	10049	10049	MS2	28/474	170306_chiba_GST_02.raw
	High	aSVSELACIYSALILHDDEVSITEDK	Unambiguous	2	2	NP_001083630.1;NP_001089441.1	N-Term(Acetyl)	CID	1	0	1	1	71.22	1.0156e-06	0	3.98791	1	3	955.136	2863.39	0.537626	133.914	15768	15768	MS2	12/246	170306_chiba_GST_02.raw
	High	aSVSELACIYSALILHDDEVSITEDK	Unambiguous	2	2	NP_001083630.1;NP_001089441.1	N-Term(Acetyl)	CID	1	0	1	1	71.15	1.0321e-06	0	15.954	4	3	955.136	2863.39	0.601573	136.406	16083	16083	MS2	14/246	170306_chiba_GST_02.raw
	High	aSVSELACIYSALILHDDEVSITEDK	Unambiguous	2	2	NP_001083630.1;NP_001089441.1	N-Term(Acetyl)	CID	1	0	1	1	69.19	1.47617e-06	0	0	28	2	1432.2	2863.4	1.11784	137.541	16223	16223	MS2	20/246	170306_chiba_GST_02.raw
	High	aSVSELACIYSALILHDDEVSITEDK	Unambiguous	2	2	NP_001083630.1;NP_001089441.1	N-Term(Acetyl)	CID	1	0	1	1	65.53	3.76463e-06	0	5.39509	16	2	1432.2	2863.39	0.606269	135.464	15964	15964	MS2	24/246	170306_chiba_GST_02.raw
	High	TAGVTVEPFWPSLFAK	Unambiguous	2	2	NP_001083630.1;NP_001089441.1		CID	1	0	1	1	63.14	7.86167e-06	0	4.31266	0	2	875.464	1749.92	-0.0303976	104.872	11946	11946	MS2	7/142	170306_chiba_GST_02.raw
	High	TAGVTVEPFWPSLFAK	Unambiguous	2	2	NP_001083630.1;NP_001089441.1		CID	1	0	1	1	63.01	8.10056e-06	0	3.41033	0	2	875.464	1749.92	0.03936	106.404	12156	12156	MS2	7/142	170306_chiba_GST_02.raw
	High	TAGVTVEPFWPSLFAK	Unambiguous	2	2	NP_001083630.1;NP_001089441.1		CID	1	0	1	1	61.76	1.05355e-05	0	3.96783	0	2	875.464	1749.92	0.31839	105.633	12051	12051	MS2	7/142	170306_chiba_GST_02.raw
	High	TAGVTVEPFWPSLFAK	Unambiguous	2	2	NP_001083630.1;NP_001089441.1		CID	1	0	1	1	61.46	8.50251e-06	0	36.1036	13	2	875.465	1749.92	0.946208	133.96	15774	15774	MS2	7/142	170306_chiba_GST_02.raw
	High	TAGVTVEPFWPSLFAK	Unambiguous	2	2	NP_001083630.1;NP_001089441.1		CID	1	0	1	1	59.45	1.35066e-05	0	7.10622	17	2	875.465	1749.92	0.806693	141.21	16682	16682	MS2	10/142	170306_chiba_GST_02.raw
	High	aSVSELACIYSALILHDDEVSITEDK	Unambiguous	2	2	NP_001083630.1;NP_001089441.1	N-Term(Acetyl)	CID	1	0	1	1	55.13	4.12783e-05	0	8.39689	7	3	955.136	2863.39	0.537626	138.953	16399	16399	MS2	12/246	170306_chiba_GST_02.raw
	High	TAGVTVEPFWPSLFAK	Unambiguous	2	2	NP_001083630.1;NP_001089441.1		CID	1	0	1	1	53.81	6.5298e-05	0	25.8402	17	2	875.465	1749.92	0.388148	142.099	16794	16794	MS2	7/142	170306_chiba_GST_02.raw
	High	TAGVTVEPFWPSLFAK	Unambiguous	2	2	NP_001083630.1;NP_001089441.1		CID	1	0	1	1	53.79	6.03765e-05	0	26.3732	5	2	875.465	1749.92	1.08572	111.835	12889	12889	MS2	19/142	170306_chiba_GST_02.raw
	High	TAGVTVEPFWPSLFAK	Unambiguous	2	2	NP_001083630.1;NP_001089441.1		CID	1	0	1	1	53.38	7.20941e-05	0	24.801	5	2	875.465	1749.92	0.59742	123.407	14413	14413	MS2	7/142	170306_chiba_GST_02.raw
	High	aSVSELACIYSALILHDDEVSITEDK	Unambiguous	2	2	NP_001083630.1;NP_001089441.1	N-Term(Acetyl)	CID	1	0	1	1	53.37	5.86827e-05	0	10.3611	6	3	955.136	2863.39	0.409732	138.113	16294	16294	MS2	11/246	170306_chiba_GST_02.raw
	High	aSVSELACIYSALILHDDEVSITEDK	Unambiguous	2	2	NP_001083630.1;NP_001089441.1	N-Term(Acetyl)	CID	1	0	1	1	52.52	6.82904e-05	0	7.39267	7	3	955.135	2863.39	-0.101844	137.611	16231	16231	MS2	17/246	170306_chiba_GST_02.raw
	High	TAGVTVEPFWPSLFAK	Unambiguous	2	2	NP_001083630.1;NP_001089441.1		CID	1	0	1	1	51.42	0.0001042	0	38.6689	23	2	875.465	1749.92	1.08572	139.551	16475	16475	MS2	18/142	170306_chiba_GST_02.raw
	High	TAGVTVEPFWPSLFAK	Unambiguous	2	2	NP_001083630.1;NP_001089441.1		CID	1	0	1	1	50.99	0.000124997	0	30.1535	7	2	875.465	1749.92	0.388148	116.222	13470	13470	MS2	14/142	170306_chiba_GST_02.raw
	High	TAGVTVEPFWPSLFAK	Unambiguous	2	2	NP_001083630.1;NP_001089441.1		CID	1	0	1	1	50.81	9.87522e-05	0	15.0927	9	2	875.465	1749.92	0.806693	123.768	14462	14462	MS2	14/142	170306_chiba_GST_02.raw
	High	TAGVTVEPFWPSLFAK	Unambiguous	2	2	NP_001083630.1;NP_001089441.1		CID	1	0	1	1	50.69	0.000133937	0	22.856	6	2	875.465	1749.92	0.527663	118.81	13809	13809	MS2	18/142	170306_chiba_GST_02.raw
	High	TAGVTVEPFWPSLFAK	Unambiguous	2	2	NP_001083630.1;NP_001089441.1		CID	1	0	1	1	49.46	0.000163066	0	29.274	17	2	875.465	1749.92	1.15548	124.996	14623	14623	MS2	18/142	170306_chiba_GST_02.raw
	High	TAGVTVEPFWPSLFAK	Unambiguous	2	2	NP_001083630.1;NP_001089441.1		CID	1	0	1	1	49.13	0.000191823	0	22.8267	19	2	875.465	1749.92	0.59742	134.195	15803	15803	MS2	16/142	170306_chiba_GST_02.raw
	High	TAGVTVEPFWPSLFAK	Unambiguous	2	2	NP_001083630.1;NP_001089441.1		CID	1	0	1	1	49.04	0.000179623	0	7.49151	11	2	875.465	1749.92	1.295	119.72	13930	13930	MS2	16/142	170306_chiba_GST_02.raw
	High	aSVSELACIYSALILHDDEVSITEDK	Unambiguous	2	2	NP_001083630.1;NP_001089441.1	N-Term(Acetyl)	CID	1	0	1	1	48.8	0.000170714	0	7.62714	10	3	955.137	2863.4	1.36894	138.667	16363	16363	MS2	21/246	170306_chiba_GST_02.raw
	High	aSVSELACIYSALILHDDEVSITEDK	Unambiguous	2	2	NP_001083630.1;NP_001089441.1	N-Term(Acetyl)	CID	1	0	1	1	48.33	0.000187288	0	13.215	6	3	955.136	2863.39	0.153944	137.268	16189	16189	MS2	13/246	170306_chiba_GST_02.raw
	High	TAGVTVEPFWPSLFAK	Unambiguous	2	2	NP_001083630.1;NP_001089441.1		CID	1	0	1	1	48.11	0.000242605	0	11.2803	1	2	875.465	1749.92	0.527663	107.186	12264	12264	MS2	9/142	170306_chiba_GST_02.raw
	High	TAGVTVEPFWPSLFAK	Unambiguous	2	2	NP_001083630.1;NP_001089441.1		CID	1	0	1	1	47.78	0.000198402	0	23.5047	6	2	875.465	1749.92	0.806693	121.297	14138	14138	MS2	19/142	170306_chiba_GST_02.raw
	High	TAGVTVEPFWPSLFAK	Unambiguous	2	2	NP_001083630.1;NP_001089441.1		CID	1	0	1	1	47.58	0.000274094	0	41.941	13	2	875.465	1749.92	0.388148	132.653	15608	15608	MS2	13/142	170306_chiba_GST_02.raw
	High	TAGVTVEPFWPSLFAK	Unambiguous	2	2	NP_001083630.1;NP_001089441.1		CID	1	0	1	1	47.22	0.000297783	0	29.8472	25	2	875.465	1749.92	0.388148	137.338	16198	16198	MS2	7/142	170306_chiba_GST_02.raw
	High	TAGVTVEPFWPSLFAK	Unambiguous	2	2	NP_001083630.1;NP_001089441.1		CID	1	0	1	1	46.7	0.000238383	0	27.0921	13	2	875.465	1749.92	0.736936	119.31	13876	13876	MS2	9/142	170306_chiba_GST_02.raw
	High	TAGVTVEPFWPSLFAK	Unambiguous	2	2	NP_001083630.1;NP_001089441.1		CID	1	0	1	1	46.57	0.000356874	0	14.0698	5	2	875.464	1749.92	-0.239671	113.888	13161	13161	MS2	13/142	170306_chiba_GST_02.raw
	High	TAGVTVEPFWPSLFAK	Unambiguous	2	2	NP_001083630.1;NP_001089441.1		CID	1	0	1	1	46.52	0.00026407	0	43.2357	9	2	875.465	1749.92	1.01597	120.733	14064	14064	MS2	9/142	170306_chiba_GST_02.raw
	High	TAGVTVEPFWPSLFAK	Unambiguous	2	2	NP_001083630.1;NP_001089441.1		CID	1	0	1	1	46.28	0.000262588	0	49.6197	5	2	875.465	1749.92	0.736936	116.671	13529	13529	MS2	9/142	170306_chiba_GST_02.raw
	High	aSVSELACIYSALILHDDEVSITEDK	Unambiguous	2	2	NP_001083630.1;NP_001089441.1	N-Term(Acetyl)	CID	1	0	1	1	44.97	0.00037892	0	26.6324	73	3	955.137	2863.4	1.1771	146.215	17266	17266	MS2	13/246	170306_chiba_GST_02.raw
	High	aSVSELACIYSALILHDDEVSITEDK	Unambiguous	2	2	NP_001083630.1;NP_001089441.1	N-Term(Acetyl)	CID	1	0	1	1	44.83	0.000406132	0	1.90754	3	3	955.136	2863.39	0.857361	135.575	15978	15978	MS2	23/246	170306_chiba_GST_02.raw
	High	TAGVTVEPFWPSLFAK	Unambiguous	2	2	NP_001083630.1;NP_001089441.1		CID	1	0	1	1	44.21	0.00061449	0	23.6939	5	2	875.464	1749.92	0.248633	113.353	13091	13091	MS2	13/142	170306_chiba_GST_02.raw
	High	TAGVTVEPFWPSLFAK	Unambiguous	2	2	NP_001083630.1;NP_001089441.1		CID	1	0	1	1	43.84	0.000460548	0	19.0693	5	2	875.465	1749.92	0.736936	115.105	13323	13323	MS2	13/142	170306_chiba_GST_02.raw
	High	TAGVTVEPFWPSLFAK	Unambiguous	2	2	NP_001083630.1;NP_001089441.1		CID	1	0	1	1	43.63	0.000702288	0	12.602	100	2	875.464	1749.92	-0.169913	149.432	17558	17558	MS2	15/142	170306_chiba_GST_02.raw
	High	TAGVTVEPFWPSLFAK	Unambiguous	2	2	NP_001083630.1;NP_001089441.1		CID	1	0	1	1	43.39	0.000627654	0	50.3032	14	2	875.466	1749.92	1.71354	127.477	14947	14947	MS2	13/142	170306_chiba_GST_02.raw
	High	TAGVTVEPFWPSLFAK	Unambiguous	2	2	NP_001083630.1;NP_001089441.1		CID	1	0	1	1	43.38	0.000512006	0	29.1068	5	2	875.465	1749.92	0.736936	112.142	12930	12930	MS2	9/142	170306_chiba_GST_02.raw
	High	TAGVTVEPFWPSLFAK	Unambiguous	2	2	NP_001083630.1;NP_001089441.1		CID	1	0	1	1	43.37	0.000722603	0	12.9308	10	2	875.465	1749.92	0.457905	123.258	14394	14394	MS2	9/142	170306_chiba_GST_02.raw
	High	TAGVTVEPFWPSLFAK	Unambiguous	2	2	NP_001083630.1;NP_001089441.1		CID	1	0	1	1	43.3	0.000673539	0	27.2453	4	2	875.465	1749.92	1.36475	111.98	12908	12908	MS2	15/142	170306_chiba_GST_02.raw
	High	TAGVTVEPFWPSLFAK	Unambiguous	2	2	NP_001083630.1;NP_001089441.1		CID	1	0	1	1	43.28	0.000559174	0	28.976	6	2	875.465	1749.92	0.946208	111.645	12864	12864	MS2	9/142	170306_chiba_GST_02.raw
	High	TAGVTVEPFWPSLFAK	Unambiguous	2	2	NP_001083630.1;NP_001089441.1		CID	1	0	1	1	43.28	0.000676648	0	28.0372	9	2	875.465	1749.92	1.36475	114.997	13309	13309	MS2	9/142	170306_chiba_GST_02.raw
	High	TAGVTVEPFWPSLFAK	Unambiguous	2	2	NP_001083630.1;NP_001089441.1		CID	1	0	1	1	43.27	0.000739434	0	7.14967	17	2	875.465	1749.92	0.457905	124.257	14526	14526	MS2	9/142	170306_chiba_GST_02.raw
	High	TAGVTVEPFWPSLFAK	Unambiguous	2	2	NP_001083630.1;NP_001089441.1		CID	1	0	1	1	42.95	0.000600784	0	17.8215	2	2	875.465	1749.92	1.01597	111.35	12825	12825	MS2	6/142	170306_chiba_GST_02.raw
	High	aSVSELACIYSALILHDDEVSITEDK	Unambiguous	2	2	NP_001083630.1;NP_001089441.1	N-Term(Acetyl)	CID	1	0	1	1	42.54	0.000732699	0	12.368	10	3	955.137	2863.4	1.81656	139.969	16527	16527	MS2	16/246	170306_chiba_GST_02.raw
	High	TAGVTVEPFWPSLFAK	Unambiguous	2	2	NP_001083630.1;NP_001089441.1		CID	1	0	1	1	42.51	0.000625568	0	32.2706	7	2	875.465	1749.92	0.736936	116.115	13456	13456	MS2	13/142	170306_chiba_GST_02.raw
	High	TAGVTVEPFWPSLFAK	Unambiguous	2	2	NP_001083630.1;NP_001089441.1		CID	1	0	1	1	42.36	0.000940838	0	28.592	18	2	875.464	1749.92	-0.169913	141.749	16749	16749	MS2	17/142	170306_chiba_GST_02.raw
	High	aSVSELACIYSALILHDDEVSITEDK	Unambiguous	2	2	NP_001083630.1;NP_001089441.1	N-Term(Acetyl)	CID	1	0	1	1	42.05	0.000807737	0	9.71072	10	3	955.135	2863.39	-0.357633	138.834	16384	16384	MS2	13/246	170306_chiba_GST_02.raw
	High	TAGVTVEPFWPSLFAK	Unambiguous	2	2	NP_001083630.1;NP_001089441.1		CID	1	0	1	1	41.98	0.00100151	0	38.9144	100	2	875.464	1749.92	0.31839	150.105	17614	17614	MS2	6/142	170306_chiba_GST_02.raw
	High	TAGVTVEPFWPSLFAK	Unambiguous	2	2	NP_001083630.1;NP_001089441.1		CID	1	0	1	1	41.88	0.00102484	0	0	14	2	875.464	1749.92	0.31839	132.987	15650	15650	MS2	17/142	170306_chiba_GST_02.raw
	High	TAGVTVEPFWPSLFAK	Unambiguous	2	2	NP_001083630.1;NP_001089441.1		CID	1	0	1	1	41.86	0.000775438	0	43.3106	12	2	875.465	1749.92	0.946208	116.594	13519	13519	MS2	17/142	170306_chiba_GST_02.raw
	High	TAGVTVEPFWPSLFAK	Unambiguous	2	2	NP_001083630.1;NP_001089441.1		CID	1	0	1	1	41.83	0.00094813	0	29.4111	7	2	875.465	1749.92	1.08572	115.935	13432	13432	MS2	15/142	170306_chiba_GST_02.raw
	High	TAGVTVEPFWPSLFAK	Unambiguous	2	2	NP_001083630.1;NP_001089441.1		CID	1	0	1	1	41.72	0.000750369	0	24.0738	19	2	875.465	1749.92	0.667178	141.498	16718	16718	MS2	17/142	170306_chiba_GST_02.raw
	High	TAGVTVEPFWPSLFAK	Unambiguous	2	2	NP_001083630.1;NP_001089441.1		CID	1	0	1	1	41.68	0.00106635	0	42.938	4	2	875.465	1749.92	0.527663	117.321	13615	13615	MS2	17/142	170306_chiba_GST_02.raw
	High	TAGVTVEPFWPSLFAK	Unambiguous	2	2	NP_001083630.1;NP_001089441.1		CID	1	0	1	1	41.33	0.000820871	0	33.3883	9	2	875.465	1749.92	0.667178	122.916	14350	14350	MS2	15/142	170306_chiba_GST_02.raw
	High	TAGVTVEPFWPSLFAK	Unambiguous	2	2	NP_001083630.1;NP_001089441.1		CID	1	0	1	1	41.26	0.00107736	0	30.8809	17	2	875.465	1749.92	1.22524	130.687	15362	15362	MS2	17/142	170306_chiba_GST_02.raw
	High	TAGVTVEPFWPSLFAK	Unambiguous	2	2	NP_001083630.1;NP_001089441.1		CID	1	0	1	1	41.18	0.000906874	0	31.0476	6	2	875.465	1749.92	0.876451	116.402	13494	13494	MS2	15/142	170306_chiba_GST_02.raw
	High	TAGVTVEPFWPSLFAK	Unambiguous	2	2	NP_001083630.1;NP_001089441.1		CID	1	0	1	1	41.02	0.00124137	0	46.6331	11	2	875.465	1749.92	0.59742	128.042	15021	15021	MS2	15/142	170306_chiba_GST_02.raw
	High	TAGVTVEPFWPSLFAK	Unambiguous	2	2	NP_001083630.1;NP_001089441.1		CID	1	0	1	1	40.72	0.00137251	0	22.07	5	2	875.464	1749.92	0.178875	111.175	12802	12802	MS2	17/142	170306_chiba_GST_02.raw
	High	aSVSELACIYSALILHDDEVSITEDK	Unambiguous	2	2	NP_001083630.1;NP_001089441.1	N-Term(Acetyl)	CID	1	0	1	1	40.25	0.00112815	0	18.4267	13	3	955.135	2863.39	-0.933157	139.676	16491	16491	MS2	13/246	170306_chiba_GST_02.raw
	High	TAGVTVEPFWPSLFAK	Unambiguous	2	2	NP_001083630.1;NP_001089441.1		CID	1	0	1	1	40.17	0.00130298	0	9.87894	6	2	875.466	1749.93	2.55063	120.072	13976	13976	MS2	15/142	170306_chiba_GST_02.raw
	High	TAGVTVEPFWPSLFAK	Unambiguous	2	2	NP_001083630.1;NP_001089441.1		CID	1	0	1	1	40	0.00162	0	22.0756	100	2	875.464	1749.92	-0.0303976	148.309	17466	17466	MS2	14/142	170306_chiba_GST_02.raw
	High	TAGVTVEPFWPSLFAK	Unambiguous	2	2	NP_001083630.1;NP_001089441.1		CID	1	0	1	1	39.24	0.00132823	0	37.1681	31	2	875.465	1749.92	0.736936	135.228	15933	15933	MS2	17/142	170306_chiba_GST_02.raw
	High	TAGVTVEPFWPSLFAK	Unambiguous	2	2	NP_001083630.1;NP_001089441.1		CID	1	0	1	1	38.99	0.00204416	0	42.2157	31	2	875.464	1749.92	0.109118	131.744	15493	15493	MS2	15/142	170306_chiba_GST_02.raw
	High	TAGVTVEPFWPSLFAK	Unambiguous	2	2	NP_001083630.1;NP_001089441.1		CID	1	0	1	1	38.97	0.00183176	0	14.6364	8	2	875.465	1749.92	1.08572	114.786	13280	13280	MS2	15/142	170306_chiba_GST_02.raw
	High	TAGVTVEPFWPSLFAK	Unambiguous	2	2	NP_001083630.1;NP_001089441.1		CID	1	0	1	1	38.93	0.00151607	0	45.1871	47	2	875.465	1749.92	1.01597	140.944	16648	16648	MS2	15/142	170306_chiba_GST_02.raw
	High	TAGVTVEPFWPSLFAK	Unambiguous	2	2	NP_001083630.1;NP_001089441.1		CID	1	0	1	1	38.88	0.00203189	0	0	100	2	875.465	1749.92	0.527663	150.949	17689	17689	MS2	15/142	170306_chiba_GST_02.raw
	High	TAGVTVEPFWPSLFAK	Unambiguous	2	2	NP_001083630.1;NP_001089441.1		CID	1	0	1	1	38.39	0.00227457	0	23.5747	6	2	875.465	1749.92	0.59742	118.104	13716	13716	MS2	16/142	170306_chiba_GST_02.raw
	High	TAGVTVEPFWPSLFAK	Unambiguous	2	2	NP_001083630.1;NP_001089441.1		CID	1	0	1	1	38.11	0.00250331	0	25.2149	9	2	875.464	1749.92	0.248633	124.082	14503	14503	MS2	14/142	170306_chiba_GST_02.raw
	High	TAGVTVEPFWPSLFAK	Unambiguous	2	2	NP_001083630.1;NP_001089441.1		CID	1	0	1	1	38.03	0.00254985	0	37.762	15	2	875.464	1749.92	0.248633	122.161	14250	14250	MS2	15/142	170306_chiba_GST_02.raw
	High	TAGVTVEPFWPSLFAK	Unambiguous	2	2	NP_001083630.1;NP_001089441.1		CID	1	0	1	1	37.59	0.00282173	0	23.3424	11	2	875.464	1749.92	-0.100155	135.481	15966	15966	MS2	14/142	170306_chiba_GST_02.raw
	High	TAGVTVEPFWPSLFAK	Unambiguous	2	2	NP_001083630.1;NP_001089441.1		CID	1	0	1	1	37.37	0.00263853	0	17.0778	9	2	875.465	1749.92	1.15548	114.529	13246	13246	MS2	9/142	170306_chiba_GST_02.raw
	High	TAGVTVEPFWPSLFAK	Unambiguous	2	2	NP_001083630.1;NP_001089441.1		CID	1	0	1	1	36.95	0.00316884	0	32.7631	22	2	875.465	1749.92	0.457905	128.541	15085	15085	MS2	16/142	170306_chiba_GST_02.raw
	High	TAGVTVEPFWPSLFAK	Unambiguous	2	2	NP_001083630.1;NP_001089441.1		CID	1	0	1	1	36.95	0.00225048	0	25.4436	6	2	875.465	1749.92	0.667178	111.015	12781	12781	MS2	16/142	170306_chiba_GST_02.raw
	High	TAGVTVEPFWPSLFAK	Unambiguous	2	2	NP_001083630.1;NP_001089441.1		CID	1	0	1	1	36.51	0.00361839	0	30.4476	22	2	875.464	1749.92	-0.0303976	137.198	16181	16181	MS2	14/142	170306_chiba_GST_02.raw
	High	TAGVTVEPFWPSLFAK	Unambiguous	2	2	NP_001083630.1;NP_001089441.1		CID	1	0	1	1	36.39	0.00360495	0	80.2612	27	2	875.465	1749.92	0.527663	144.005	17036	17036	MS2	14/142	170306_chiba_GST_02.raw
	High	TAGVTVEPFWPSLFAK	Unambiguous	2	2	NP_001083630.1;NP_001089441.1		CID	1	0	1	1	36.18	0.00348231	0	22.2274	100	2	875.465	1749.92	1.08572	148.865	17513	17513	MS2	14/142	170306_chiba_GST_02.raw
	High	TAGVTVEPFWPSLFAK	Unambiguous	2	2	NP_001083630.1;NP_001089441.1		CID	1	0	1	1	36.18	0.00328952	0	0	68	2	875.466	1749.92	1.50427	146.569	17297	17297	MS2	7/142	170306_chiba_GST_02.raw
	High	TAGVTVEPFWPSLFAK	Unambiguous	2	2	NP_001083630.1;NP_001089441.1		CID	1	0	1	1	36.14	0.00288216	0	21.7616	8	2	875.465	1749.92	1.01597	123.102	14374	14374	MS2	8/142	170306_chiba_GST_02.raw
	High	TAGVTVEPFWPSLFAK	Unambiguous	2	2	NP_001083630.1;NP_001089441.1		CID	1	0	1	1	35.97	0.003971	0	23.1757	1	3	583.979	1749.92	0.450221	105.064	11973	11973	MS2	15/142	170306_chiba_GST_02.raw
	High	aSVSELACIYSALILHDDEVSITEDK	Unambiguous	2	2	NP_001083630.1;NP_001089441.1	N-Term(Acetyl)	CID	1	0	1	1	35.59	0.00350593	0	9.14074	13	3	955.135	2863.39	-0.0378973	139.147	16424	16424	MS2	10/246	170306_chiba_GST_02.raw
	High	TAGVTVEPFWPSLFAK	Unambiguous	2	2	NP_001083630.1;NP_001089441.1		CID	1	0	1	1	35.09	0.00368593	0	37.5353	21	2	875.465	1749.92	0.876451	143.878	17020	17020	MS2	16/142	170306_chiba_GST_02.raw
	High	TAGVTVEPFWPSLFAK	Unambiguous	2	2	NP_001083630.1;NP_001089441.1		CID	1	0	1	1	34.39	0.00524038	0	11.1589	9	2	875.465	1749.92	1.36475	125.482	14688	14688	MS2	14/142	170306_chiba_GST_02.raw
	High	TAGVTVEPFWPSLFAK	Unambiguous	2	2	NP_001083630.1;NP_001089441.1		CID	1	0	1	1	34.34	0.00581644	0	40.5786	13	2	875.464	1749.92	0.31839	131.136	15418	15418	MS2	14/142	170306_chiba_GST_02.raw
	High	TAGVTVEPFWPSLFAK	Unambiguous	2	2	NP_001083630.1;NP_001089441.1		CID	1	0	1	1	34.16	0.00454693	0	55.6716	12	2	875.465	1749.92	1.01597	127.748	14982	14982	MS2	11/142	170306_chiba_GST_02.raw
	High	TAGVTVEPFWPSLFAK	Unambiguous	2	2	NP_001083630.1;NP_001089441.1		CID	1	0	1	1	33.46	0.0071229	0	14.4237	87	2	875.464	1749.92	0.31839	151.313	17723	17723	MS2	17/142	170306_chiba_GST_02.raw
	High	TAGVTVEPFWPSLFAK	Unambiguous	2	2	NP_001083630.1;NP_001089441.1		CID	1	0	1	1	33.33	0.00729289	0	60.6967	100	2	875.465	1749.92	0.59742	147.471	17392	17392	MS2	18/142	170306_chiba_GST_02.raw
	High	TAGVTVEPFWPSLFAK	Unambiguous	2	2	NP_001083630.1;NP_001089441.1		CID	1	0	1	1	33.31	0.00555325	0	73.5027	17	2	875.465	1749.92	0.876451	139.861	16514	16514	MS2	7/142	170306_chiba_GST_02.raw
	High	TAGVTVEPFWPSLFAK	Unambiguous	2	2	NP_001083630.1;NP_001089441.1		CID	1	0	1	1	33.02	0.00808193	0	53.684	23	2	875.464	1749.92	0.109118	139.368	16451	16451	MS2	15/142	170306_chiba_GST_02.raw
	High	TAGVTVEPFWPSLFAK	Unambiguous	2	2	NP_001083630.1;NP_001089441.1		CID	1	0	1	1	31.31	0.0119816	0	20.3523	97	2	875.464	1749.92	0.03936	151.691	17756	17756	MS2	10/142	170306_chiba_GST_02.raw
	High	TAGVTVEPFWPSLFAK	Unambiguous	2	2	NP_001083630.1;NP_001089441.1		CID	1	0	1	1	31.15	0.01105	0	35.4927	10	2	875.465	1749.92	1.295	126.402	14808	14808	MS2	17/142	170306_chiba_GST_02.raw
	High	TAGVTVEPFWPSLFAK	Unambiguous	2	2	NP_001083630.1;NP_001089441.1		CID	1	0	1	1	31.11	0.0106101	0	30.0531	8	2	875.466	1749.92	1.71354	120.403	14020	14020	MS2	13/142	170306_chiba_GST_02.raw
NP_001079632.1	heat shock protein family A (Hsp70) member 8 L homeolog [Xenopus laevis]	2832.16	61.61	19	4	33	61	646	70.7481	5.40186
	Confidence Level	Sequence	PSM Ambiguity	# Proteins	# Protein Groups	Protein Group Accessions	Modifications	Activation Type	ΔScore	ΔCn	Rank	Search Engine Rank	IonScore	Exp Value	# Missed Cleavages	Isolation Interference [%]	Ion Inject Time [ms]	Charge	m/z [Da]	MH+ [Da]	ΔM [ppm]	RT [min]	First Scan	Last Scan	MS Order	Ions Matched	Spectrum File
	High	IINEPTAAAIAYGLDK	Unambiguous	18	2	NP_001079632.1;NP_001080068.1		CID	1	0	1	1	115.52	4.96562e-11	0	20.1978	0	2	830.452	1659.9	0.306195	79.2667	8367	8367	MS2	13/168	170306_chiba_GST_02.raw
	High	SINPDEAVAYGAAVQAAILSGDK	Unambiguous	12	2	NP_001079632.1;NP_001080068.1		CID	1	0	1	1	108.72	2.135e-10	0	5.29074	0	2	1130.58	2260.15	0.26836	100.547	11361	11361	MS2	17/258	170306_chiba_GST_02.raw
	High	SFYPEEVSSMVLTK	Unambiguous	4	1	NP_001079632.1		CID	1	0	1	1	102.78	5.53591e-10	0	4.84036	0	2	808.898	1616.79	1.09786	83.5567	8989	8989	MS2	12/128	170306_chiba_GST_02.raw
	High	IINEPTAAAIAYGLDKK	Unambiguous	15	2	NP_001079632.1;NP_001080068.1		CID	1	0	1	1	100.76	1.06611e-09	1	6.39406	0	2	894.499	1787.99	0.489469	73.2312	7479	7479	MS2	13/178	170306_chiba_GST_02.raw
	High	GPAVGIDLGTTYSCVGVFQHGK	Unambiguous	9	2	NP_001079632.1;NP_001080068.1		CID	1	0	1	1	100.42	1.54329e-09	0	25.8759	1	2	1103.55	2206.1	0.56589	83.1903	8938	8938	MS2	17/186	170306_chiba_GST_02.raw
	High	NQVAMNPTNTVFDAK	Unambiguous	9	2	NP_001079632.1;NP_001080068.1		CID	1	0	1	1	94.36	5.14845e-09	0	0.433578	0	2	825.401	1649.8	0.19307	63.1691	5942	5942	MS2	20/150	170306_chiba_GST_02.raw
	High	NQVAMNPTNTVFDAK	Unambiguous	9	2	NP_001079632.1;NP_001080068.1		CID	1	0	1	1	88.13	1.94577e-08	0	4.04647	0	2	825.401	1649.79	-0.694825	62.3995	5821	5821	MS2	11/150	170306_chiba_GST_02.raw
	High	SINPDEAVAYGAAVQAAILSGDK	Unambiguous	12	2	NP_001079632.1;NP_001080068.1		CID	1	0	1	1	87.49	2.88745e-08	0	28.7452	3	2	1130.58	2260.14	-0.703819	102.184	11585	11585	MS2	16/258	170306_chiba_GST_02.raw
	High	QTQTFTTYSDNQPGVLIQVYEGER	Unambiguous	5	2	NP_001079632.1;NP_001080068.1		CID	1	0	1	1	87.31	1.75563e-08	0	5.44573	0	2	1387.67	2774.33	1.70465	83.4561	8975	8975	MS2	14/272	170306_chiba_GST_02.raw
	High	FEELNADLFR	Unambiguous	8	2	NP_001079632.1;NP_001080068.1		CID	1	0	1	1	86.9	2.83802e-08	0	8.42622	0	2	627.312	1253.62	0.288267	81.4987	8691	8691	MS2	8/92	170306_chiba_GST_02.raw
	High	SINPDEAVAYGAAVQAAILSGDK	Unambiguous	12	2	NP_001079632.1;NP_001080068.1		CID	1	0	1	1	86.68	3.16805e-08	0	3.20107	0	3	754.053	2260.15	0.0733761	100.534	11359	11359	MS2	16/258	170306_chiba_GST_02.raw
	High	SQIHDIVLVGGSTR	Unambiguous	6	2	NP_001079632.1;NP_001080068.1		CID	1	0	1	1	86.05	3.30257e-08	0	4.35845	0	2	741.408	1481.81	0.689541	53.4984	4426	4426	MS2	12/152	170306_chiba_GST_02.raw
	High	NVLIFDLGGGTFDVSILTIEDGIFEVK	Unambiguous	9	2	NP_001079632.1;NP_001080068.1		CID	1	0	1	1	84.09	3.66545e-08	0	29.6213	7	2	1456.27	2911.54	1.39522	142.72	16875	16875	MS2	10/298	170306_chiba_GST_02.raw
	High	DAGTISGLNVLR	Unambiguous	7	2	NP_001079632.1;NP_001080068.1		CID	1	0	1	1	83.71	9.5334e-08	0	4.35372	0	2	608.339	1215.67	0.498576	74.7633	7705	7705	MS2	9/104	170306_chiba_GST_02.raw
	High	SINPDEAVAYGAAVQAAILSGDK	Unambiguous	12	2	NP_001079632.1;NP_001080068.1		CID	1	0	1	1	82.48	8.9825e-08	0	11.5297	0	3	754.054	2260.15	0.316421	101.286	11463	11463	MS2	12/258	170306_chiba_GST_02.raw
	High	TTPSYVAFTDTER	Unambiguous	12	2	NP_001079632.1;NP_001080068.1		CID	1	0	1	1	81.56	7.78529e-08	0	7.70914	1	2	744.354	1487.7	-0.143777	60.5383	5530	5530	MS2	10/118	170306_chiba_GST_02.raw
	High	TTPSYVAFTDTER	Unambiguous	12	2	NP_001079632.1;NP_001080068.1		CID	1	0	1	1	80.98	8.89764e-08	0	3.61621	0	2	744.354	1487.7	-0.0617236	61.3183	5651	5651	MS2	10/118	170306_chiba_GST_02.raw
	High	NSLESYAFNMK	Unambiguous	5	2	NP_001079632.1;NP_001080068.1		CID	1	0	1	1	78.24	1.4172e-07	0	31.3415	0	2	652.304	1303.6	0.780718	73.3508	7496	7496	MS2	9/106	170306_chiba_GST_02.raw
	High	SINPDEAVAYGAAVQAAILSGDK	Unambiguous	12	2	NP_001079632.1;NP_001080068.1		CID	1	0	1	1	77.4	2.85693e-07	0	7.4974	1	3	754.054	2260.15	0.64048	102.119	11576	11576	MS2	14/258	170306_chiba_GST_02.raw
	High	MVQEAETYKAEDEQQR	Unambiguous	2	1	NP_001079632.1		CID	1	0	1	1	70.5	5.16926e-07	1	0	1	2	977.945	1954.88	0.296778	44.4221	2953	2953	MS2	13/164	170306_chiba_GST_02.raw
	High	RFEDAVVQSDMK	Unambiguous	4	2	NP_001079632.1;NP_001080068.1		CID	1	0	1	1	68.16	1.61158e-06	1	3.43401	0	2	712.846	1424.68	0.0605465	48.289	3589	3589	MS2	9/124	170306_chiba_GST_02.raw
	High	TVTNAVVTVPAYFNDSQR	Unambiguous	5	2	NP_001079632.1;NP_001080068.1		CID	1	0	1	1	66.88	3.57928e-06	0	2.62448	0	2	991.503	1982	0.923354	76.6056	7978	7978	MS2	13/194	170306_chiba_GST_02.raw
	High	NQVAMNPTNTVFDAK	Unambiguous	9	2	NP_001079632.1;NP_001080068.1		CID	1	0	1	1	66.73	2.98316e-06	0	14.4945	3	2	825.401	1649.8	0.267061	64.3472	6128	6128	MS2	19/150	170306_chiba_GST_02.raw
	High	NQVAmNPTNTVFDAK	Unambiguous	9	2	NP_001079632.1;NP_001080068.1	M5(Oxidation)	CID	1	0	1	1	65.34	3.55285e-06	0	2.46695	1	2	833.399	1665.79	0.166031	52.0007	4190	4190	MS2	16/150	170306_chiba_GST_02.raw
	High	FEDAVVQSDMK	Unambiguous	4	2	NP_001079632.1;NP_001080068.1		CID	1	0	1	1	65.26	1.28076e-06	0	7.19011	0	2	634.795	1268.58	0.585214	50.8538	4006	4006	MS2	16/102	170306_chiba_GST_02.raw
	High	TTPSYVAFTDTER	Unambiguous	12	2	NP_001079632.1;NP_001080068.1		CID	1	0	1	1	61.83	7.31602e-06	0	8.99119	1	2	744.354	1487.7	-0.0617236	62.1395	5781	5781	MS2	9/118	170306_chiba_GST_02.raw
	High	IINEPTAAAIAYGLDK	Unambiguous	18	2	NP_001079632.1;NP_001080068.1		CID	1	0	1	1	60.45	1.59578e-05	0	18.5603	0	3	553.97	1659.9	0.261324	79.3317	8376	8376	MS2	10/168	170306_chiba_GST_02.raw
	High	NQTAEKEEFEHQQK	Unambiguous	6	2	NP_001079632.1;NP_001080068.1		CID	1	0	1	1	58.78	1.11907e-05	1	1.23951	1	2	873.408	1745.81	0.224807	42.3995	2613	2613	MS2	10/144	170306_chiba_GST_02.raw
	High	QTQTFTTYSDNQPGVLIQVYEGER	Unambiguous	5	2	NP_001079632.1;NP_001080068.1		CID	1	0	1	1	58.16	1.34426e-05	0	5.6884	0	3	925.448	2774.33	1.25981	83.5494	8988	8988	MS2	21/272	170306_chiba_GST_02.raw
	High	SINPDEAVAYGAAVQAAILSGDK	Unambiguous	12	2	NP_001079632.1;NP_001080068.1		CID	1	0	1	1	57.93	2.65757e-05	0	28.2	1	3	754.053	2260.15	-0.169669	102.309	11602	11602	MS2	22/258	170306_chiba_GST_02.raw
	High	SQIHDIVLVGGSTR	Unambiguous	6	2	NP_001079632.1;NP_001080068.1		CID	1	0	1	1	57.56	2.40282e-05	0	17.1043	2	2	741.407	1481.81	-0.0518727	55.0293	4669	4669	MS2	10/152	170306_chiba_GST_02.raw
	High	NQVAMNPTNTVFDAK	Unambiguous	9	2	NP_001079632.1;NP_001080068.1		CID	1	0	1	1	57.14	2.71442e-05	0	30.217	2	2	825.401	1649.8	0.119078	63.8975	6058	6058	MS2	22/150	170306_chiba_GST_02.raw
	High	ARFEELNADLFR	Unambiguous	8	2	NP_001079632.1;NP_001080068.1		CID	1	0	1	1	55.2	3.63904e-05	1	0.818542	0	2	740.881	1480.76	0.865459	76.1959	7916	7916	MS2	16/118	170306_chiba_GST_02.raw
	High	NQVAMNPTNTVFDAK	Unambiguous	9	2	NP_001079632.1;NP_001080068.1		CID	1	0	1	1	54.92	3.99413e-05	0	28.9943	2	2	825.402	1649.8	0.563025	64.1973	6105	6105	MS2	20/150	170306_chiba_GST_02.raw
	High	TVTNAVVTVPAYFNDSQR	Unambiguous	5	2	NP_001079632.1;NP_001080068.1		CID	1	0	1	1	54.85	5.84303e-05	0	3.40693	0	3	661.338	1982	0.731802	76.6129	7979	7979	MS2	20/194	170306_chiba_GST_02.raw
	High	MKEIAEAYLGK	Unambiguous	9	2	NP_001079632.1;NP_001080068.1		CID	1	0	1	1	54.57	3.05498e-05	1	67.1109	1	2	626.834	1252.66	-0.0648542	51.8222	4161	4161	MS2	9/104	170306_chiba_GST_02.raw
	High	MVQEAETYKAEDEQQR	Unambiguous	2	1	NP_001079632.1		CID	1	0	1	1	53.59	2.53763e-05	1	1.28876	0	3	652.299	1954.88	0.196234	44.3469	2940	2940	MS2	17/164	170306_chiba_GST_02.raw
	High	LLQDFFNGK	Unambiguous	7	2	NP_001079632.1;NP_001080068.1		CID	1	0	1	1	53.11	7.50081e-05	0	4.80125	0	2	541.288	1081.57	0.521098	79.2018	8357	8357	MS2	7/76	170306_chiba_GST_02.raw
	High	NVLIFDLGGGTFDVSILTIEDGIFEVK	Unambiguous	9	2	NP_001079632.1;NP_001080068.1		CID	1	0	1	1	53.06	4.86896e-05	0	10.045	3	3	971.183	2911.53	0.300516	142.464	16841	16841	MS2	24/298	170306_chiba_GST_02.raw
	High	VCNPIITK	Unambiguous	8	2	NP_001079632.1;NP_001080068.1		CID	1	0	1	1	51.49	4.43486e-05	0	9.85078	0	2	444.255	887.502	0.273272	48.4067	3608	3608	MS2	7/66	170306_chiba_GST_02.raw
	High	EIAEAYLGK	Unambiguous	9	2	NP_001079632.1;NP_001080068.1		CID	1	0	1	1	50.44	0.000134192	0	10.247	0	2	497.266	993.526	0.50433	52.1577	4215	4215	MS2	6/70	170306_chiba_GST_02.raw
	High	GPAVGIDLGTTYSCVGVFQHGK	Unambiguous	9	2	NP_001079632.1;NP_001080068.1		CID	1	0	1	1	50.3	0.000134389	0	6.12696	0	3	736.037	2206.1	0.089463	82.9581	8904	8904	MS2	19/186	170306_chiba_GST_02.raw
	High	MVQEAETYK	Unambiguous	2	1	NP_001079632.1		CID	1	0	1	1	47.32	0.000181646	0	6.23113	0	2	549.761	1098.51	0.19139	44.4727	2961	2961	MS2	14/82	170306_chiba_GST_02.raw
	High	MVNHFVAEFK	Unambiguous	5	2	NP_001079632.1;NP_001080068.1		CID	1	0	1	1	46.58	0.00033847	0	17.9676	0	2	611.308	1221.61	-0.485872	56.0616	4832	4832	MS2	13/86	170306_chiba_GST_02.raw
	High	HWPFTVVSDGGRPK	Unambiguous	3	1	NP_001079632.1		CID	1	0	1	1	46.5	0.000306705	0	49.111	1	3	528.276	1582.81	0.329899	58.3327	5187	5187	MS2	14/116	170306_chiba_GST_02.raw
	High	VEIIANDQGNR	Unambiguous	16	2	NP_001079632.1;NP_001080068.1		CID	1	0	1	1	45.08	0.000284067	0	22.8636	0	2	614.818	1228.63	-0.00158179	46.7252	3335	3335	MS2	9/100	170306_chiba_GST_02.raw
	High	ARFEELNADLFR	Unambiguous	8	2	NP_001079632.1;NP_001080068.1		CID	1	0	1	1	44.53	0.00045632	1	5.80419	0	3	494.257	1480.76	0.753331	76.1897	7915	7915	MS2	8/118	170306_chiba_GST_02.raw
	High	LSKEDIER	Unambiguous	8	2	NP_001079632.1;NP_001080068.1		CID	0.2727	0	1	1	44.2	0.000914355	1	22.8305	0	2	495.267	989.527	0.782028	43.5216	2801	2801	MS2	7/76	170306_chiba_GST_02.raw
	High	GTLDPVEK	Unambiguous	5	2	NP_001079632.1;NP_001080068.1		CID	1	0	1	1	41.82	0.000572162	0	16.2405	0	2	429.732	858.457	0.287159	45.8662	3192	3192	MS2	5/66	170306_chiba_GST_02.raw
	High	SENVQDLLLLDVTPLSLGIETAGGVMTVLIK	Unambiguous	10	2	NP_001079632.1;NP_001080068.1		CID	1	0	1	1	39.63	0.000337568	0	8.42744	2	3	1080.27	3238.79	0.900348	143.392	16961	16961	MS2	16/348	170306_chiba_GST_02.raw
	High	FELTGIPPAPR	Unambiguous	9	2	NP_001079632.1;NP_001080068.1		CID	1	0	1	1	38.39	0.00168058	0	44.5385	1	2	599.335	1197.66	-0.454491	74.0002	7592	7592	MS2	8/84	170306_chiba_GST_02.raw
	High	NQTAEKEEFEHQQK	Unambiguous	6	2	NP_001079632.1;NP_001080068.1		CID	1	0	1	1	37.53	0.0014923	1	17.4856	0	3	582.608	1745.81	0.112222	42.3406	2602	2602	MS2	15/144	170306_chiba_GST_02.raw
	High	MVNHFVAEFK	Unambiguous	5	2	NP_001079632.1;NP_001080068.1		CID	1	0	1	1	37.25	0.00321162	0	45.3213	1	2	611.309	1221.61	2.1122	55.3069	4712	4712	MS2	11/86	170306_chiba_GST_02.raw
	High	MKEIAEAYLGK	Unambiguous	9	2	NP_001079632.1;NP_001080068.1		CID	1	0	1	1	35.01	0.00377023	1	14.9298	0	3	418.225	1252.66	-0.367935	51.9357	4179	4179	MS2	7/104	170306_chiba_GST_02.raw
	High	HWPFTVVSDGGRPK	Unambiguous	3	1	NP_001079632.1		CID	1	0	1	1	34.67	0.00525437	0	35.8153	0	3	528.276	1582.81	-0.0171515	59.0746	5303	5303	MS2	16/116	170306_chiba_GST_02.raw
	High	MVNHFVAEFK	Unambiguous	5	2	NP_001079632.1;NP_001080068.1		CID	1	0	1	1	33.95	0.00467152	0	13.8932	0	3	407.874	1221.61	-0.0971753	55.3931	4725	4725	MS2	8/86	170306_chiba_GST_02.raw
	High	SENVQDLLLLDVTPLSLGIETAGGVMTVLIK	Unambiguous	10	2	NP_001079632.1;NP_001080068.1		CID	1	0	1	1	33.89	0.00120454	0	43.2637	5	3	1080.27	3238.79	0.674207	143.269	16945	16945	MS2	14/348	170306_chiba_GST_02.raw
	High	IINEPTAAAIAYGLDKK	Unambiguous	15	2	NP_001079632.1;NP_001080068.1		CID	1	0	1	1	33.65	0.00560975	1	4.55963	0	3	596.668	1787.99	0.106451	73.1933	7473	7473	MS2	16/178	170306_chiba_GST_02.raw
	High	DNNLLGK	Unambiguous	15	2	NP_001079632.1;NP_001080068.1		CID	1	0	1	1	31.05	0.0297997	0	51.0215	0	2	387.211	773.416	0.523234	47.5527	3468	3468	MS2	6/58	170306_chiba_GST_02.raw
	High	MVNHFVAEFK	Unambiguous	5	2	NP_001079632.1;NP_001080068.1		CID	1	0	1	1	30.67	0.0131984	0	64.766	1	3	407.874	1221.61	-0.471898	57.9705	5129	5129	MS2	8/86	170306_chiba_GST_02.raw
	High	VQVEYK	Unambiguous	7	2	NP_001079632.1;NP_001080068.1		CID	1	0	1	1	29.49	0.0263158	0	6.27405	0	2	383.211	765.414	0.0259126	44.4508	2957	2957	MS2	5/48	170306_chiba_GST_02.raw
NP_001080068.1	heat shock protein family A (Hsp70) member 1 like S homeolog [Xenopus laevis]	2819.8	60.15	16	3	32	62	650	71.1444	5.59229
	Confidence Level	Sequence	PSM Ambiguity	# Proteins	# Protein Groups	Protein Group Accessions	Modifications	Activation Type	ΔScore	ΔCn	Rank	Search Engine Rank	IonScore	Exp Value	# Missed Cleavages	Isolation Interference [%]	Ion Inject Time [ms]	Charge	m/z [Da]	MH+ [Da]	ΔM [ppm]	RT [min]	First Scan	Last Scan	MS Order	Ions Matched	Spectrum File
	High	IINEPTAAAIAYGLDK	Unambiguous	18	2	NP_001079632.1;NP_001080068.1		CID	1	0	1	1	115.52	4.96562e-11	0	20.1978	0	2	830.452	1659.9	0.306195	79.2667	8367	8367	MS2	13/168	170306_chiba_GST_02.raw
	High	SINPDEAVAYGAAVQAAILSGDK	Unambiguous	12	2	NP_001079632.1;NP_001080068.1		CID	1	0	1	1	108.72	2.135e-10	0	5.29074	0	2	1130.58	2260.15	0.26836	100.547	11361	11361	MS2	17/258	170306_chiba_GST_02.raw
	High	IINEPTAAAIAYGLDKK	Unambiguous	15	2	NP_001079632.1;NP_001080068.1		CID	1	0	1	1	100.76	1.06611e-09	1	6.39406	0	2	894.499	1787.99	0.489469	73.2312	7479	7479	MS2	13/178	170306_chiba_GST_02.raw
	High	GPAVGIDLGTTYSCVGVFQHGK	Unambiguous	9	2	NP_001079632.1;NP_001080068.1		CID	1	0	1	1	100.42	1.54329e-09	0	25.8759	1	2	1103.55	2206.1	0.56589	83.1903	8938	8938	MS2	17/186	170306_chiba_GST_02.raw
	High	NQVAMNPTNTVFDAK	Unambiguous	9	2	NP_001079632.1;NP_001080068.1		CID	1	0	1	1	94.36	5.14845e-09	0	0.433578	0	2	825.401	1649.8	0.19307	63.1691	5942	5942	MS2	20/150	170306_chiba_GST_02.raw
	High	SFYPEEISSMVLTK	Unambiguous	1	1	NP_001080068.1		CID	1	0	1	1	91.81	8.10784e-09	0	5.83031	0	2	815.906	1630.8	0.773685	88.4446	9682	9682	MS2	11/128	170306_chiba_GST_02.raw
	High	SFYPEEISSMVLTK	Unambiguous	1	1	NP_001080068.1		CID	1	0	1	1	89.58	1.35489e-08	0	8.26577	1	2	815.906	1630.8	0.848537	89.4025	9819	9819	MS2	11/128	170306_chiba_GST_02.raw
	High	NQVAMNPTNTVFDAK	Unambiguous	9	2	NP_001079632.1;NP_001080068.1		CID	1	0	1	1	88.13	1.94577e-08	0	4.04647	0	2	825.401	1649.79	-0.694825	62.3995	5821	5821	MS2	11/150	170306_chiba_GST_02.raw
	High	SINPDEAVAYGAAVQAAILSGDK	Unambiguous	12	2	NP_001079632.1;NP_001080068.1		CID	1	0	1	1	87.49	2.88745e-08	0	28.7452	3	2	1130.58	2260.14	-0.703819	102.184	11585	11585	MS2	16/258	170306_chiba_GST_02.raw
	High	QTQTFTTYSDNQPGVLIQVYEGER	Unambiguous	5	2	NP_001079632.1;NP_001080068.1		CID	1	0	1	1	87.31	1.75563e-08	0	5.44573	0	2	1387.67	2774.33	1.70465	83.4561	8975	8975	MS2	14/272	170306_chiba_GST_02.raw
	High	FEELNADLFR	Unambiguous	8	2	NP_001079632.1;NP_001080068.1		CID	1	0	1	1	86.9	2.83802e-08	0	8.42622	0	2	627.312	1253.62	0.288267	81.4987	8691	8691	MS2	8/92	170306_chiba_GST_02.raw
	High	SINPDEAVAYGAAVQAAILSGDK	Unambiguous	12	2	NP_001079632.1;NP_001080068.1		CID	1	0	1	1	86.68	3.16805e-08	0	3.20107	0	3	754.053	2260.15	0.0733761	100.534	11359	11359	MS2	16/258	170306_chiba_GST_02.raw
	High	SQIHDIVLVGGSTR	Unambiguous	6	2	NP_001079632.1;NP_001080068.1		CID	1	0	1	1	86.05	3.30257e-08	0	4.35845	0	2	741.408	1481.81	0.689541	53.4984	4426	4426	MS2	12/152	170306_chiba_GST_02.raw
	High	NVLIFDLGGGTFDVSILTIEDGIFEVK	Unambiguous	9	2	NP_001079632.1;NP_001080068.1		CID	1	0	1	1	84.09	3.66545e-08	0	29.6213	7	2	1456.27	2911.54	1.39522	142.72	16875	16875	MS2	10/298	170306_chiba_GST_02.raw
	High	DAGTISGLNVLR	Unambiguous	7	2	NP_001079632.1;NP_001080068.1		CID	1	0	1	1	83.71	9.5334e-08	0	4.35372	0	2	608.339	1215.67	0.498576	74.7633	7705	7705	MS2	9/104	170306_chiba_GST_02.raw
	High	SINPDEAVAYGAAVQAAILSGDK	Unambiguous	12	2	NP_001079632.1;NP_001080068.1		CID	1	0	1	1	82.48	8.9825e-08	0	11.5297	0	3	754.054	2260.15	0.316421	101.286	11463	11463	MS2	12/258	170306_chiba_GST_02.raw
	High	TTPSYVAFTDTER	Unambiguous	12	2	NP_001079632.1;NP_001080068.1		CID	1	0	1	1	81.56	7.78529e-08	0	7.70914	1	2	744.354	1487.7	-0.143777	60.5383	5530	5530	MS2	10/118	170306_chiba_GST_02.raw
	High	TTPSYVAFTDTER	Unambiguous	12	2	NP_001079632.1;NP_001080068.1		CID	1	0	1	1	80.98	8.89764e-08	0	3.61621	0	2	744.354	1487.7	-0.0617236	61.3183	5651	5651	MS2	10/118	170306_chiba_GST_02.raw
	High	NSLESYAFNMK	Unambiguous	5	2	NP_001079632.1;NP_001080068.1		CID	1	0	1	1	78.24	1.4172e-07	0	31.3415	0	2	652.304	1303.6	0.780718	73.3508	7496	7496	MS2	9/106	170306_chiba_GST_02.raw
	High	SINPDEAVAYGAAVQAAILSGDK	Unambiguous	12	2	NP_001079632.1;NP_001080068.1		CID	1	0	1	1	77.4	2.85693e-07	0	7.4974	1	3	754.054	2260.15	0.64048	102.119	11576	11576	MS2	14/258	170306_chiba_GST_02.raw
	High	RFEDAVVQSDMK	Unambiguous	4	2	NP_001079632.1;NP_001080068.1		CID	1	0	1	1	68.16	1.61158e-06	1	3.43401	0	2	712.846	1424.68	0.0605465	48.289	3589	3589	MS2	9/124	170306_chiba_GST_02.raw
	High	TVTNAVVTVPAYFNDSQR	Unambiguous	5	2	NP_001079632.1;NP_001080068.1		CID	1	0	1	1	66.88	3.57928e-06	0	2.62448	0	2	991.503	1982	0.923354	76.6056	7978	7978	MS2	13/194	170306_chiba_GST_02.raw
	High	NQVAMNPTNTVFDAK	Unambiguous	9	2	NP_001079632.1;NP_001080068.1		CID	1	0	1	1	66.73	2.98316e-06	0	14.4945	3	2	825.401	1649.8	0.267061	64.3472	6128	6128	MS2	19/150	170306_chiba_GST_02.raw
	High	NQVAmNPTNTVFDAK	Unambiguous	9	2	NP_001079632.1;NP_001080068.1	M5(Oxidation)	CID	1	0	1	1	65.34	3.55285e-06	0	2.46695	1	2	833.399	1665.79	0.166031	52.0007	4190	4190	MS2	16/150	170306_chiba_GST_02.raw
	High	FEDAVVQSDMK	Unambiguous	4	2	NP_001079632.1;NP_001080068.1		CID	1	0	1	1	65.26	1.28076e-06	0	7.19011	0	2	634.795	1268.58	0.585214	50.8538	4006	4006	MS2	16/102	170306_chiba_GST_02.raw
	High	TTPSYVAFTDTER	Unambiguous	12	2	NP_001079632.1;NP_001080068.1		CID	1	0	1	1	61.83	7.31602e-06	0	8.99119	1	2	744.354	1487.7	-0.0617236	62.1395	5781	5781	MS2	9/118	170306_chiba_GST_02.raw
	High	IINEPTAAAIAYGLDK	Unambiguous	18	2	NP_001079632.1;NP_001080068.1		CID	1	0	1	1	60.45	1.59578e-05	0	18.5603	0	3	553.97	1659.9	0.261324	79.3317	8376	8376	MS2	10/168	170306_chiba_GST_02.raw
	High	NQTAEKEEFEHQQK	Unambiguous	6	2	NP_001079632.1;NP_001080068.1		CID	1	0	1	1	58.78	1.11907e-05	1	1.23951	1	2	873.408	1745.81	0.224807	42.3995	2613	2613	MS2	10/144	170306_chiba_GST_02.raw
	High	QTQTFTTYSDNQPGVLIQVYEGER	Unambiguous	5	2	NP_001079632.1;NP_001080068.1		CID	1	0	1	1	58.16	1.34426e-05	0	5.6884	0	3	925.448	2774.33	1.25981	83.5494	8988	8988	MS2	21/272	170306_chiba_GST_02.raw
	High	SINPDEAVAYGAAVQAAILSGDK	Unambiguous	12	2	NP_001079632.1;NP_001080068.1		CID	1	0	1	1	57.93	2.65757e-05	0	28.2	1	3	754.053	2260.15	-0.169669	102.309	11602	11602	MS2	22/258	170306_chiba_GST_02.raw
	High	SQIHDIVLVGGSTR	Unambiguous	6	2	NP_001079632.1;NP_001080068.1		CID	1	0	1	1	57.56	2.40282e-05	0	17.1043	2	2	741.407	1481.81	-0.0518727	55.0293	4669	4669	MS2	10/152	170306_chiba_GST_02.raw
	High	NQVAMNPTNTVFDAK	Unambiguous	9	2	NP_001079632.1;NP_001080068.1		CID	1	0	1	1	57.14	2.71442e-05	0	30.217	2	2	825.401	1649.8	0.119078	63.8975	6058	6058	MS2	22/150	170306_chiba_GST_02.raw
	High	ARFEELNADLFR	Unambiguous	8	2	NP_001079632.1;NP_001080068.1		CID	1	0	1	1	55.2	3.63904e-05	1	0.818542	0	2	740.881	1480.76	0.865459	76.1959	7916	7916	MS2	16/118	170306_chiba_GST_02.raw
	High	NQVAMNPTNTVFDAK	Unambiguous	9	2	NP_001079632.1;NP_001080068.1		CID	1	0	1	1	54.92	3.99413e-05	0	28.9943	2	2	825.402	1649.8	0.563025	64.1973	6105	6105	MS2	20/150	170306_chiba_GST_02.raw
	High	TVTNAVVTVPAYFNDSQR	Unambiguous	5	2	NP_001079632.1;NP_001080068.1		CID	1	0	1	1	54.85	5.84303e-05	0	3.40693	0	3	661.338	1982	0.731802	76.6129	7979	7979	MS2	20/194	170306_chiba_GST_02.raw
	High	MKEIAEAYLGK	Unambiguous	9	2	NP_001079632.1;NP_001080068.1		CID	1	0	1	1	54.57	3.05498e-05	1	67.1109	1	2	626.834	1252.66	-0.0648542	51.8222	4161	4161	MS2	9/104	170306_chiba_GST_02.raw
	High	LLQDFFNGK	Unambiguous	7	2	NP_001079632.1;NP_001080068.1		CID	1	0	1	1	53.11	7.50081e-05	0	4.80125	0	2	541.288	1081.57	0.521098	79.2018	8357	8357	MS2	7/76	170306_chiba_GST_02.raw
	High	NVLIFDLGGGTFDVSILTIEDGIFEVK	Unambiguous	9	2	NP_001079632.1;NP_001080068.1		CID	1	0	1	1	53.06	4.86896e-05	0	10.045	3	3	971.183	2911.53	0.300516	142.464	16841	16841	MS2	24/298	170306_chiba_GST_02.raw
	High	VCNPIITK	Unambiguous	8	2	NP_001079632.1;NP_001080068.1		CID	1	0	1	1	51.49	4.43486e-05	0	9.85078	0	2	444.255	887.502	0.273272	48.4067	3608	3608	MS2	7/66	170306_chiba_GST_02.raw
	High	EIAEAYLGK	Unambiguous	9	2	NP_001079632.1;NP_001080068.1		CID	1	0	1	1	50.44	0.000134192	0	10.247	0	2	497.266	993.526	0.50433	52.1577	4215	4215	MS2	6/70	170306_chiba_GST_02.raw
	High	GPAVGIDLGTTYSCVGVFQHGK	Unambiguous	9	2	NP_001079632.1;NP_001080068.1		CID	1	0	1	1	50.3	0.000134389	0	6.12696	0	3	736.037	2206.1	0.089463	82.9581	8904	8904	MS2	19/186	170306_chiba_GST_02.raw
	High	MVNHFVAEFK	Unambiguous	5	2	NP_001079632.1;NP_001080068.1		CID	1	0	1	1	46.58	0.00033847	0	17.9676	0	2	611.308	1221.61	-0.485872	56.0616	4832	4832	MS2	13/86	170306_chiba_GST_02.raw
	High	VEIIANDQGNR	Unambiguous	16	2	NP_001079632.1;NP_001080068.1		CID	1	0	1	1	45.08	0.000284067	0	22.8636	0	2	614.818	1228.63	-0.00158179	46.7252	3335	3335	MS2	9/100	170306_chiba_GST_02.raw
	High	ARFEELNADLFR	Unambiguous	8	2	NP_001079632.1;NP_001080068.1		CID	1	0	1	1	44.53	0.00045632	1	5.80419	0	3	494.257	1480.76	0.753331	76.1897	7915	7915	MS2	8/118	170306_chiba_GST_02.raw
	High	LSKEDIER	Unambiguous	8	2	NP_001079632.1;NP_001080068.1		CID	0.2727	0	1	1	44.2	0.000914355	1	22.8305	0	2	495.267	989.527	0.782028	43.5216	2801	2801	MS2	7/76	170306_chiba_GST_02.raw
	High	GTLDPVEK	Unambiguous	5	2	NP_001079632.1;NP_001080068.1		CID	1	0	1	1	41.82	0.000572162	0	16.2405	0	2	429.732	858.457	0.287159	45.8662	3192	3192	MS2	5/66	170306_chiba_GST_02.raw
	High	HWPFNVVSDSGRPK	Unambiguous	1	1	NP_001080068.1		CID	1	0	1	1	41.39	0.00125616	0	15.4623	0	3	542.611	1625.82	-0.136493	59.4852	5367	5367	MS2	15/126	170306_chiba_GST_02.raw
	High	MVQEADKYK	Unambiguous	1	1	NP_001080068.1		CID	1	0	1	1	41.11	0.000968077	1	7.38563	0	2	556.276	1111.54	-0.491179	42.8934	2696	2696	MS2	6/80	170306_chiba_GST_02.raw
	High	SENVQDLLLLDVTPLSLGIETAGGVMTVLIK	Unambiguous	10	2	NP_001079632.1;NP_001080068.1		CID	1	0	1	1	39.63	0.000337568	0	8.42744	2	3	1080.27	3238.79	0.900348	143.392	16961	16961	MS2	16/348	170306_chiba_GST_02.raw
	High	HWPFNVVSDSGRPK	Unambiguous	1	1	NP_001080068.1		CID	1	0	1	1	39.53	0.0018553	0	21.5164	0	3	542.611	1625.82	0.314001	60.4389	5515	5515	MS2	8/126	170306_chiba_GST_02.raw
	High	FELTGIPPAPR	Unambiguous	9	2	NP_001079632.1;NP_001080068.1		CID	1	0	1	1	38.39	0.00168058	0	44.5385	1	2	599.335	1197.66	-0.454491	74.0002	7592	7592	MS2	8/84	170306_chiba_GST_02.raw
	High	NQTAEKEEFEHQQK	Unambiguous	6	2	NP_001079632.1;NP_001080068.1		CID	1	0	1	1	37.53	0.0014923	1	17.4856	0	3	582.608	1745.81	0.112222	42.3406	2602	2602	MS2	15/144	170306_chiba_GST_02.raw
	High	MVNHFVAEFK	Unambiguous	5	2	NP_001079632.1;NP_001080068.1		CID	1	0	1	1	37.25	0.00321162	0	45.3213	1	2	611.309	1221.61	2.1122	55.3069	4712	4712	MS2	11/86	170306_chiba_GST_02.raw
	High	MKEIAEAYLGK	Unambiguous	9	2	NP_001079632.1;NP_001080068.1		CID	1	0	1	1	35.01	0.00377023	1	14.9298	0	3	418.225	1252.66	-0.367935	51.9357	4179	4179	MS2	7/104	170306_chiba_GST_02.raw
	High	MVNHFVAEFK	Unambiguous	5	2	NP_001079632.1;NP_001080068.1		CID	1	0	1	1	33.95	0.00467152	0	13.8932	0	3	407.874	1221.61	-0.0971753	55.3931	4725	4725	MS2	8/86	170306_chiba_GST_02.raw
	High	SENVQDLLLLDVTPLSLGIETAGGVMTVLIK	Unambiguous	10	2	NP_001079632.1;NP_001080068.1		CID	1	0	1	1	33.89	0.00120454	0	43.2637	5	3	1080.27	3238.79	0.674207	143.269	16945	16945	MS2	14/348	170306_chiba_GST_02.raw
	High	IINEPTAAAIAYGLDKK	Unambiguous	15	2	NP_001079632.1;NP_001080068.1		CID	1	0	1	1	33.65	0.00560975	1	4.55963	0	3	596.668	1787.99	0.106451	73.1933	7473	7473	MS2	16/178	170306_chiba_GST_02.raw
	High	HWPFNVVSDSGRPK	Unambiguous	1	1	NP_001080068.1		CID	1	0	1	1	31.29	0.0128542	0	19.8518	0	3	542.611	1625.82	-0.136493	58.6962	5244	5244	MS2	14/126	170306_chiba_GST_02.raw
	High	SFYPEEISSMVLTK	Unambiguous	1	1	NP_001080068.1		CID	1	0	1	1	31.07	0.00996575	0	46.6484	0	3	544.273	1630.8	0.466028	88.7523	9726	9726	MS2	14/128	170306_chiba_GST_02.raw
	High	DNNLLGK	Unambiguous	15	2	NP_001079632.1;NP_001080068.1		CID	1	0	1	1	31.05	0.0297997	0	51.0215	0	2	387.211	773.416	0.523234	47.5527	3468	3468	MS2	6/58	170306_chiba_GST_02.raw
	High	MVNHFVAEFK	Unambiguous	5	2	NP_001079632.1;NP_001080068.1		CID	1	0	1	1	30.67	0.0131984	0	64.766	1	3	407.874	1221.61	-0.471898	57.9705	5129	5129	MS2	8/86	170306_chiba_GST_02.raw
	High	VQVEYK	Unambiguous	7	2	NP_001079632.1;NP_001080068.1		CID	1	0	1	1	29.49	0.0263158	0	6.27405	0	2	383.211	765.414	0.0259126	44.4508	2957	2957	MS2	5/48	170306_chiba_GST_02.raw
NP_001080134.1	ribosomal protein, large, P0 S homeolog [Xenopus laevis]	2790.02	56.19	2	2	13	57	315	34.0756	5.56689
	Confidence Level	Sequence	PSM Ambiguity	# Proteins	# Protein Groups	Protein Group Accessions	Modifications	Activation Type	ΔScore	ΔCn	Rank	Search Engine Rank	IonScore	Exp Value	# Missed Cleavages	Isolation Interference [%]	Ion Inject Time [ms]	Charge	m/z [Da]	MH+ [Da]	ΔM [ppm]	RT [min]	First Scan	Last Scan	MS Order	Ions Matched	Spectrum File
	High	TSFFQALGITTK	Unambiguous	2	2	NP_001080134.1;XP_018117015.1		CID	1	0	1	1	109.09	1.28859e-10	0	6.31043	0	2	657.359	1313.71	-0.110248	92.4745	10245	10245	MS2	10/122	170306_chiba_GST_02.raw
	High	TSFFQALGITTK	Unambiguous	2	2	NP_001080134.1;XP_018117015.1		CID	1	0	1	1	102.6	7.94087e-10	0	5.27072	0	2	657.358	1313.71	-0.481929	93.2383	10350	10350	MS2	10/122	170306_chiba_GST_02.raw
	High	AFLADPSAFVVAAPAAVAAAAAPAAEAAK	Unambiguous	1	1	NP_001080134.1		CID	1	0	1	1	101.09	6.10759e-10	0	9.30587	1	2	1305.7	2610.39	-0.156956	103.498	11762	11762	MS2	34/266	170306_chiba_GST_02.raw
	High	VLAIAVETDYSFPLADK	Unambiguous	2	2	NP_001080134.1;XP_018117015.1		CID	1	0	1	1	90.25	1.04791e-08	0	38.0089	2	2	926.491	1851.98	0.781919	95.896	10721	10721	MS2	26/146	170306_chiba_GST_02.raw
	High	AFLADPSAFVVAAPAAVAAAAAPAAEAAK	Unambiguous	1	1	NP_001080134.1		CID	1	0	1	1	90.18	6.57189e-09	0	0	5	2	1305.7	2610.4	1.05889	103.895	11815	11815	MS2	11/266	170306_chiba_GST_02.raw
	High	VLAIAVETDYSFPLADK	Unambiguous	2	2	NP_001080134.1;XP_018117015.1		CID	1	0	1	1	90.17	1.13951e-08	0	20.7246	2	2	926.491	1851.97	-0.00904339	95.7312	10698	10698	MS2	27/146	170306_chiba_GST_02.raw
	High	VLAIAVETDYSFPLADK	Unambiguous	2	2	NP_001080134.1;XP_018117015.1		CID	1	0	1	1	90.07	1.16605e-08	0	4.4563	0	2	926.491	1851.97	0.122784	91.723	10140	10140	MS2	13/146	170306_chiba_GST_02.raw
	High	GTIEILSDVQLIK	Unambiguous	3	2	NP_001080134.1;XP_018117015.1		CID	1	0	1	1	88.17	1.27258e-08	0	28.2401	1	3	476.948	1428.83	-0.822877	90.9138	10028	10028	MS2	9/114	170306_chiba_GST_02.raw
	High	TSFFQALGITTK	Unambiguous	2	2	NP_001080134.1;XP_018117015.1		CID	1	0	1	1	87.58	1.42285e-08	0	46.9726	1	2	657.359	1313.71	0.0755924	95.1232	10611	10611	MS2	10/122	170306_chiba_GST_02.raw
	High	VLAIAVETDYSFPLADK	Unambiguous	2	2	NP_001080134.1;XP_018117015.1		CID	1	0	1	1	86.2	2.83062e-08	0	8.03769	1	2	926.49	1851.97	-0.206784	93.2521	10352	10352	MS2	13/146	170306_chiba_GST_02.raw
	High	IIQLLDDYPK	Unambiguous	2	2	NP_001080134.1;XP_018117015.1		CID	1	0	1	1	84.47	4.93037e-08	0	25.954	1	2	609.343	1217.68	0.500095	78.3863	8240	8240	MS2	15/88	170306_chiba_GST_02.raw
	High	VLAIAVETDYSFPLADK	Unambiguous	2	2	NP_001080134.1;XP_018117015.1		CID	1	0	1	1	82.36	6.85302e-08	0	3.42907	0	2	926.49	1851.97	-0.206784	90.9677	10035	10035	MS2	12/146	170306_chiba_GST_02.raw
	High	GTIEILSDVQLIK	Unambiguous	3	2	NP_001080134.1;XP_018117015.1		CID	1	0	1	1	80.27	7.75272e-08	0	5.74418	0	2	714.919	1428.83	0.0622299	91.5824	10120	10120	MS2	15/114	170306_chiba_GST_02.raw
	High	TSFFQALGITTK	Unambiguous	2	2	NP_001080134.1;XP_018117015.1		CID	1	0	1	1	78.77	1.28757e-07	0	36.5358	2	2	657.359	1313.71	0.540194	95.6006	10679	10679	MS2	10/122	170306_chiba_GST_02.raw
	High	VLAIAVETDYSFPLADK	Unambiguous	2	2	NP_001080134.1;XP_018117015.1		CID	1	0	1	1	78.05	1.74693e-07	0	27.3186	1	2	926.491	1851.97	0.452352	94.8105	10567	10567	MS2	12/146	170306_chiba_GST_02.raw
	High	GTIEILSDVQLIK	Unambiguous	3	2	NP_001080134.1;XP_018117015.1		CID	1	0	1	1	75.05	2.57902e-07	0	3.2707	0	2	714.919	1428.83	0.147664	90.818	10014	10014	MS2	16/114	170306_chiba_GST_02.raw
	High	AFLADPSAFVVAAPAAVAAAAAPAAEAAK	Unambiguous	1	1	NP_001080134.1		CID	1	0	1	1	74.86	2.15548e-07	0	7.54863	1	2	1305.7	2610.39	0.591255	102.761	11663	11663	MS2	10/266	170306_chiba_GST_02.raw
	High	VLAIAVETDYSFPLADK	Unambiguous	2	2	NP_001080134.1;XP_018117015.1		CID	1	0	1	1	74.83	3.6667e-07	0	59.4637	2	2	926.491	1851.98	0.584179	99.0944	11163	11163	MS2	18/146	170306_chiba_GST_02.raw
	High	VLAIAVETDYSFPLADK	Unambiguous	2	2	NP_001080134.1;XP_018117015.1		CID	1	0	1	1	73.58	5.19659e-07	0	28.5073	2	2	926.491	1851.97	-0.00904339	96.3276	10782	10782	MS2	13/146	170306_chiba_GST_02.raw
	High	TSFFQALGITTK	Unambiguous	2	2	NP_001080134.1;XP_018117015.1		CID	1	0	1	1	72.81	5.47162e-07	0	41.1815	1	2	657.359	1313.71	-0.110248	94.7837	10563	10563	MS2	10/122	170306_chiba_GST_02.raw
	High	AFLADPSAFVVAAPAAVAAAAAPAAEAAKDEK	Unambiguous	1	1	NP_001080134.1		CID	1	0	1	1	72.07	5.64991e-07	1	7.88153	0	3	994.858	2982.56	0.441434	99.4746	11215	11215	MS2	27/306	170306_chiba_GST_02.raw
	High	GTIEILSDVQLIK	Unambiguous	3	2	NP_001080134.1;XP_018117015.1		CID	1	0	1	1	69.95	8.34553e-07	0	50.2857	28	2	714.919	1428.83	0.0622299	138.231	16308	16308	MS2	14/114	170306_chiba_GST_02.raw
	High	GTIEILSDVQLIK	Unambiguous	3	2	NP_001080134.1;XP_018117015.1		CID	1	0	1	1	69.71	1.00491e-06	0	29.2723	2	2	714.919	1428.83	0.489398	95.1482	10615	10615	MS2	16/114	170306_chiba_GST_02.raw
	High	TSFFQALGITTK	Unambiguous	2	2	NP_001080134.1;XP_018117015.1		CID	1	0	1	1	69.14	9.93477e-07	0	25.3533	0	2	657.359	1313.71	-0.0173278	94.0006	10455	10455	MS2	9/122	170306_chiba_GST_02.raw
	High	VLAIAVETDYSFPLADK	Unambiguous	2	2	NP_001080134.1;XP_018117015.1		CID	1	0	1	1	67.66	1.91106e-06	0	18.643	1	2	926.491	1851.97	0.254611	94.0479	10462	10462	MS2	13/146	170306_chiba_GST_02.raw
	High	NVASVCLQIGYPTVASVPHSVINGYK	Unambiguous	2	2	NP_001080134.1;XP_018117015.1		CID	1	0	1	1	67.15	2.15883e-06	0	10.013	0	3	906.143	2716.41	0.143507	87.4326	9540	9540	MS2	14/282	170306_chiba_GST_02.raw
	High	CFIVGADNVGSK	Unambiguous	2	2	NP_001080134.1;XP_018117015.1		CID	1	0	1	1	66.6	2.88785e-06	0	34.4872	1	2	605.301	1209.59	0.713057	57.7911	5101	5101	MS2	16/104	170306_chiba_GST_02.raw
	High	GTIEILSDVQLIK	Unambiguous	3	2	NP_001080134.1;XP_018117015.1		CID	1	0	1	1	63.39	4.192e-06	0	11.0068	1	2	714.919	1428.83	0.233097	92.5154	10251	10251	MS2	14/114	170306_chiba_GST_02.raw
	High	TSFFQALGITTK	Unambiguous	2	2	NP_001080134.1;XP_018117015.1		CID	1	0	1	1	61.55	5.70371e-06	0	38.7914	15	2	657.359	1313.71	0.0755924	137.123	16172	16172	MS2	10/122	170306_chiba_GST_02.raw
	High	AGAIAPCEVTVPAQNTGLGPEK	Unambiguous	2	2	NP_001080134.1;XP_018117015.1		CID	1	0	1	1	61.51	7.73418e-06	0	1.97379	0	2	1062.04	2123.08	0.400826	69.0337	6844	6844	MS2	15/210	170306_chiba_GST_02.raw
	High	AFLADPSAFVVAAPAAVAAAAAPAAEAAK	Unambiguous	1	1	NP_001080134.1		CID	1	0	1	1	61	5.24257e-06	0	26.8848	0	3	870.803	2610.39	0.67963	102.709	11656	11656	MS2	23/266	170306_chiba_GST_02.raw
	High	IIQLLDDYPK	Unambiguous	2	2	NP_001080134.1;XP_018117015.1		CID	1	0	1	1	60.37	1.29026e-05	0	4.94777	0	2	609.343	1217.68	0.299598	79.1959	8356	8356	MS2	15/88	170306_chiba_GST_02.raw
	High	AFLADPSAFVVAAPAAVAAAAAPAAEAAK	Unambiguous	1	1	NP_001080134.1		CID	1	0	1	1	59.98	7.28346e-06	0	2.50701	1	2	1305.7	2610.4	1.43299	103.648	11782	11782	MS2	13/266	170306_chiba_GST_02.raw
	High	GTIEILSDVQLIK	Unambiguous	3	2	NP_001080134.1;XP_018117015.1		CID	1	0	1	1	59.02	1.03384e-05	0	36.2055	2	2	714.919	1428.83	0.147664	94.5736	10535	10535	MS2	8/114	170306_chiba_GST_02.raw
	High	GHLENNPALEK	Unambiguous	2	2	NP_001080134.1;XP_018117015.1		CID	1	0	1	1	57.76	3.17402e-05	0	5.63337	0	2	611.315	1221.62	0.66565	43.692	2829	2829	MS2	9/104	170306_chiba_GST_02.raw
	High	GTIEILSDVQLIK	Unambiguous	3	2	NP_001080134.1;XP_018117015.1		CID	1	0	1	1	57.56	1.44695e-05	0	10.3551	1	2	714.919	1428.83	-0.450373	93.2876	10357	10357	MS2	16/114	170306_chiba_GST_02.raw
	High	VLAIAVETDYSFPLADK	Unambiguous	2	2	NP_001080134.1;XP_018117015.1		CID	1	0	1	1	56.79	2.48152e-05	0	31.6179	1	2	926.491	1851.97	0.0568702	92.6518	10270	10270	MS2	13/146	170306_chiba_GST_02.raw
	High	GTIEILSDVQLIK	Unambiguous	3	2	NP_001080134.1;XP_018117015.1		CID	1	0	1	1	56.22	1.96994e-05	0	37.4199	1	2	714.919	1428.83	0.147664	93.9471	10448	10448	MS2	8/114	170306_chiba_GST_02.raw
	High	VLAIAVETDYSFPLADK	Unambiguous	2	2	NP_001080134.1;XP_018117015.1		CID	1	0	1	1	55.85	2.89918e-05	0	14.0971	0	2	926.491	1851.97	0.188697	90.2394	9935	9935	MS2	20/146	170306_chiba_GST_02.raw
	High	GTIEILSDVQLIK	Unambiguous	3	2	NP_001080134.1;XP_018117015.1		CID	1	0	1	1	54.7	3.18514e-05	0	71.7627	2	2	714.919	1428.83	0.318531	94.4319	10516	10516	MS2	16/114	170306_chiba_GST_02.raw
	High	TSFFQALGITTK	Unambiguous	2	2	NP_001080134.1;XP_018117015.1		CID	1	0	1	1	53.51	3.6321e-05	0	29.235	15	2	657.359	1313.71	0.168513	138.033	16284	16284	MS2	9/122	170306_chiba_GST_02.raw
	High	SNYFLK	Unambiguous	2	2	NP_001080134.1;XP_018117015.1		CID	0.3077	0	1	1	52.3	5.35848e-05	0	4.90013	0	2	386.205	771.403	-0.11838	52.6947	4300	4300	MS2	5/48	170306_chiba_GST_02.raw
	High	AGAIAPCEVTVPAQNTGLGPEK	Unambiguous	2	2	NP_001080134.1;XP_018117015.1		CID	1	0	1	1	51.83	7.90655e-05	0	20.6212	1	2	1062.04	2123.08	0.630813	69.8975	6976	6976	MS2	15/210	170306_chiba_GST_02.raw
	High	GNVGFVFTK	Unambiguous	2	2	NP_001080134.1;XP_018117015.1		CID	1	0	1	1	51.37	6.67454e-05	0	25.2335	0	2	484.764	968.521	0.530821	67.1305	6553	6553	MS2	7/78	170306_chiba_GST_02.raw
	High	AGAIAPCEVTVPAQNTGLGPEK	Unambiguous	2	2	NP_001080134.1;XP_018117015.1		CID	1	0	1	1	49.86	0.000113087	0	4.78836	0	3	708.365	2123.08	0.250751	69.0471	6846	6846	MS2	18/210	170306_chiba_GST_02.raw
	High	IIQLLDDYPK	Unambiguous	2	2	NP_001080134.1;XP_018117015.1		CID	1	0	1	1	47.87	0.000225361	0	27.2861	100	2	609.343	1217.68	0.399847	148.394	17473	17473	MS2	8/88	170306_chiba_GST_02.raw
	High	GTIEILSDVQLIK	Unambiguous	3	2	NP_001080134.1;XP_018117015.1		CID	1	0	1	1	45.06	0.000293176	0	55.6214	25	2	714.919	1428.83	0.403964	136.714	16121	16121	MS2	13/114	170306_chiba_GST_02.raw
	High	GNVGFVFTK	Unambiguous	2	2	NP_001080134.1;XP_018117015.1		CID	1	0	1	1	44.34	0.000182224	0	17.963	0	2	484.764	968.52	-0.225406	67.9555	6677	6677	MS2	7/78	170306_chiba_GST_02.raw
	High	EDLTEVR	Unambiguous	2	2	NP_001080134.1;XP_018117015.1		CID	1	0	1	1	43.92	0.00104216	0	5.47547	0	2	431.219	861.431	-0.0235914	46.3557	3275	3275	MS2	6/56	170306_chiba_GST_02.raw
	High	AFLADPSAFVVAAPAAVAAAAAPAAEAAK	Unambiguous	1	1	NP_001080134.1		CID	1	0	1	1	43.53	0.000330488	0	7.69327	0	3	870.803	2610.39	0.328906	103.47	11758	11758	MS2	16/266	170306_chiba_GST_02.raw
	High	IIQLLDDYPK	Unambiguous	2	2	NP_001080134.1;XP_018117015.1		CID	1	0	1	1	41.31	0.00102066	0	52.0918	81	2	609.343	1217.68	0.399847	151.868	17772	17772	MS2	8/88	170306_chiba_GST_02.raw
	High	IIQLLDDYPK	Unambiguous	2	2	NP_001080134.1;XP_018117015.1		CID	1	0	1	1	40.04	0.00113946	0	72.7849	18	2	609.344	1217.68	2.50506	139.216	16432	16432	MS2	8/88	170306_chiba_GST_02.raw
	High	GHLENNPALEK	Unambiguous	2	2	NP_001080134.1;XP_018117015.1		CID	1	0	1	1	37.92	0.00305921	0	6.95141	0	3	407.879	1221.62	0.429813	43.6978	2830	2830	MS2	7/104	170306_chiba_GST_02.raw
	High	IIQLLDDYPK	Unambiguous	2	2	NP_001080134.1;XP_018117015.1		CID	1	0	1	1	33.74	0.00486069	0	40.8496	12	2	609.343	1217.68	1.40233	139.007	16406	16406	MS2	8/88	170306_chiba_GST_02.raw
	High	IIQLLDDYPK	Unambiguous	2	2	NP_001080134.1;XP_018117015.1		CID	1	0	1	1	32.2	0.00692944	0	63.3388	13	2	609.343	1217.68	1.40233	142.168	16803	16803	MS2	8/88	170306_chiba_GST_02.raw
	High	VLAIAVETDYSFPLADK	Unambiguous	2	2	NP_001080134.1;XP_018117015.1		CID	1	0	1	1	30.21	0.0106237	0	72.0895	24	2	926.491	1851.98	0.584179	139.248	16436	16436	MS2	10/146	170306_chiba_GST_02.raw
	High	VLAIAVETDYSFPLADK	Unambiguous	2	2	NP_001080134.1;XP_018117015.1		CID	1	0	1	1	28.85	0.015638	0	43.4156	1	3	617.996	1851.97	-0.115174	90.5903	9983	9983	MS2	15/146	170306_chiba_GST_02.raw
AAH41299.1	Rpls3-b protein [Xenopus laevis]	2770.84	71.95	3	1	17	70	246	26.9986	9.65674
	Confidence Level	Sequence	PSM Ambiguity	# Proteins	# Protein Groups	Protein Group Accessions	Modifications	Activation Type	ΔScore	ΔCn	Rank	Search Engine Rank	IonScore	Exp Value	# Missed Cleavages	Isolation Interference [%]	Ion Inject Time [ms]	Charge	m/z [Da]	MH+ [Da]	ΔM [ppm]	RT [min]	First Scan	Last Scan	MS Order	Ions Matched	Spectrum File
	High	GLCAIAQAESLR	Unambiguous	3	2	AAH41299.1;NP_001094409.1		CID	1	0	1	1	88.51	2.05756e-08	0	24.2709	0	2	616.327	1231.65	0.205208	72.006	7292	7292	MS2	10/100	170306_chiba_GST_02.raw
	High	GLCAIAQAESLR	Unambiguous	3	2	AAH41299.1;NP_001094409.1		CID	1	0	1	1	88.29	2.16448e-08	0	6.62766	0	2	616.327	1231.65	0.205208	71.2661	7180	7180	MS2	9/100	170306_chiba_GST_02.raw
	High	FGFPEGSVELYAEK	Unambiguous	3	2	AAH41299.1;NP_001094409.1		CID	1	0	1	1	84.9	4.83773e-08	0	4.68565	0	2	786.883	1572.76	0.299614	81.2097	8649	8649	MS2	11/120	170306_chiba_GST_02.raw
	High	ELAEDGYSGVEVR	Unambiguous	3	2	AAH41299.1;NP_001094409.1		CID	1	0	1	1	79.03	1.28152e-07	0	7.42634	0	2	712.339	1423.67	-0.0434274	52.7294	4306	4306	MS2	9/116	170306_chiba_GST_02.raw
	High	ELAEDGYSGVEVR	Unambiguous	3	2	AAH41299.1;NP_001094409.1		CID	1	0	1	1	79.02	1.24061e-07	0	9.47676	2	2	712.338	1423.67	-0.472145	62.0673	5770	5770	MS2	9/116	170306_chiba_GST_02.raw
	High	ELAEDGYSGVEVR	Unambiguous	3	2	AAH41299.1;NP_001094409.1		CID	1	0	1	1	78.18	1.52055e-07	0	1.93114	0	2	712.337	1423.67	-1.7583	51.9003	4173	4173	MS2	9/116	170306_chiba_GST_02.raw
	High	FVDGLMIHSGDPVNYYVDTAVR	Unambiguous	4	2	AAH41299.1;NP_001094409.1		CID	1	0	1	1	78.12	2.21234e-07	0	11.2798	0	2	1234.6	2468.19	0.743732	84.0133	9054	9054	MS2	13/216	170306_chiba_GST_02.raw
	High	ELAEDGYSGVEVR	Unambiguous	3	2	AAH41299.1;NP_001094409.1		CID	1	0	1	1	76.33	2.31645e-07	0	11.9149	2	2	712.339	1423.67	-0.129171	61.7943	5727	5727	MS2	9/116	170306_chiba_GST_02.raw
	High	ELAEDGYSGVEVR	Unambiguous	3	2	AAH41299.1;NP_001094409.1		CID	1	0	1	1	73.3	4.79429e-07	0	0	1	2	712.339	1423.67	0.042316	55.164	4690	4690	MS2	9/116	170306_chiba_GST_02.raw
	High	KPLPDHVSIVEPK	Unambiguous	3	2	AAH41299.1;NP_001094409.1		CID	1	0	1	1	73.25	5.65416e-07	0	11.0751	0	2	729.92	1458.83	0.856829	47.439	3450	3450	MS2	11/132	170306_chiba_GST_02.raw
	High	ELAEDGYSGVEVR	Unambiguous	3	2	AAH41299.1;NP_001094409.1		CID	1	0	1	1	73.17	4.79538e-07	0	26.281	1	2	712.339	1423.67	-0.129171	54.2346	4543	4543	MS2	9/116	170306_chiba_GST_02.raw
	High	ELAEDGYSGVEVR	Unambiguous	3	2	AAH41299.1;NP_001094409.1		CID	1	0	1	1	72.8	5.22183e-07	0	19.0243	2	2	712.339	1423.67	-0.214914	62.3445	5813	5813	MS2	9/116	170306_chiba_GST_02.raw
	High	ELAEDGYSGVEVR	Unambiguous	3	2	AAH41299.1;NP_001094409.1		CID	1	0	1	1	72.76	6.62079e-07	0	17.657	2	2	712.339	1423.67	0.556776	56.6631	4926	4926	MS2	9/116	170306_chiba_GST_02.raw
	High	GLCAIAQAESLR	Unambiguous	3	2	AAH41299.1;NP_001094409.1		CID	1	0	1	1	71.82	9.6018e-07	0	24.2691	1	2	616.327	1231.65	0.205208	72.2921	7336	7336	MS2	10/100	170306_chiba_GST_02.raw
	High	ELAEDGYSGVEVR	Unambiguous	3	2	AAH41299.1;NP_001094409.1		CID	1	0	1	1	71.36	7.27483e-07	0	0	1	2	712.339	1423.67	-0.129171	55.023	4668	4668	MS2	9/116	170306_chiba_GST_02.raw
	High	ELAEDGYSGVEVR	Unambiguous	3	2	AAH41299.1;NP_001094409.1		CID	1	0	1	1	71.17	7.56197e-07	0	37.9861	2	2	712.338	1423.67	-0.300658	56.7568	4941	4941	MS2	9/116	170306_chiba_GST_02.raw
	High	GAKPDQPQPPVMPQPVATA	Unambiguous	2	1	AAH41299.1		CID	1	0	1	1	70.18	1.33836e-06	0	2.10192	0	2	964.999	1928.99	0.224337	55.6323	4763	4763	MS2	12/192	170306_chiba_GST_02.raw
	High	ELAEDGYSGVEVR	Unambiguous	3	2	AAH41299.1;NP_001094409.1		CID	1	0	1	1	69.9	1.27912e-06	0	36.5328	2	2	712.339	1423.67	0.471033	56.5312	4905	4905	MS2	9/116	170306_chiba_GST_02.raw
	High	ELAEDGYSGVEVR	Unambiguous	3	2	AAH41299.1;NP_001094409.1		CID	1	0	1	1	68.69	1.69009e-06	0	0	1	2	712.339	1423.67	0.385289	53.5606	4437	4437	MS2	9/116	170306_chiba_GST_02.raw
	High	FGFPEGSVELYAEK	Unambiguous	3	2	AAH41299.1;NP_001094409.1		CID	1	0	1	1	67.7	2.29263e-06	0	15.6905	0	2	786.883	1572.76	0.53246	82.0905	8778	8778	MS2	12/120	170306_chiba_GST_02.raw
	High	RFGFPEGSVELYAEK	Unambiguous	3	2	AAH41299.1;NP_001094409.1		CID	1	0	1	1	67.38	3.32714e-06	1	9.11313	1	2	864.934	1728.86	0.52851	74.9814	7738	7738	MS2	12/156	170306_chiba_GST_02.raw
	High	ELAEDGYSGVEVR	Unambiguous	3	2	AAH41299.1;NP_001094409.1		CID	1	0	1	1	66.24	2.43626e-06	0	24.3871	3	2	712.339	1423.67	-0.0434274	60.6071	5541	5541	MS2	9/116	170306_chiba_GST_02.raw
	High	TEIIILATR	Unambiguous	2	2	AAH41299.1;NP_001094409.1		CID	1	0	1	1	65.4	3.3599e-06	0	4.68716	0	2	515.319	1029.63	0.213147	74.3378	7642	7642	MS2	7/78	170306_chiba_GST_02.raw
	High	LLGGLAVR	Unambiguous	3	2	AAH41299.1;NP_001094409.1		CID	1	0	1	1	63.94	2.66406e-06	0	20.7095	0	2	399.763	798.52	0.0621388	60.067	5457	5457	MS2	7/58	170306_chiba_GST_02.raw
	High	GCEVVVSGK	Unambiguous	3	2	AAH41299.1;NP_001094409.1		CID	1	0	1	1	63.92	7.31943e-06	0	10.1269	0	2	439.226	877.445	0.115737	45.2464	3087	3087	MS2	12/72	170306_chiba_GST_02.raw
	High	LLGGLAVR	Unambiguous	3	2	AAH41299.1;NP_001094409.1		CID	1	0	1	1	63.57	2.90097e-06	0	5.60846	0	2	399.763	798.519	-0.472909	60.8032	5570	5570	MS2	7/58	170306_chiba_GST_02.raw
	High	ELAEDGYSGVEVR	Unambiguous	3	2	AAH41299.1;NP_001094409.1		CID	1	0	1	1	60.83	8.21908e-06	0	6.62905	2	2	712.339	1423.67	-0.214914	61.9478	5751	5751	MS2	8/116	170306_chiba_GST_02.raw
	High	TEIIILATR	Unambiguous	2	2	AAH41299.1;NP_001094409.1		CID	1	0	1	1	59.7	1.1626e-05	0	16.7032	0	2	515.319	1029.63	0.568819	75.2291	7774	7774	MS2	7/78	170306_chiba_GST_02.raw
	High	TEIIILATR	Unambiguous	2	2	AAH41299.1;NP_001094409.1		CID	1	0	1	1	59.49	1.2202e-05	0	23.555	0	2	515.319	1029.63	0.805934	73.4803	7516	7516	MS2	7/78	170306_chiba_GST_02.raw
	High	KPLPDHVSIVEPK	Unambiguous	3	2	AAH41299.1;NP_001094409.1		CID	1	0	1	1	59.41	1.36889e-05	0	9.7388	0	2	729.92	1458.83	0.438446	48.1847	3573	3573	MS2	11/132	170306_chiba_GST_02.raw
	High	FVDGLMIHSGDPVNYYVDTAVR	Unambiguous	4	2	AAH41299.1;NP_001094409.1		CID	1	0	1	1	58.54	2.00841e-05	0	10.1366	0	3	823.403	2468.19	0.664098	84.875	9178	9178	MS2	20/216	170306_chiba_GST_02.raw
	High	RFGFPEGSVELYAEK	Unambiguous	3	2	AAH41299.1;NP_001094409.1		CID	1	0	1	1	58.27	2.86702e-05	1	20.9283	0	3	576.958	1728.86	0.238303	74.919	7728	7728	MS2	9/156	170306_chiba_GST_02.raw
	High	ELAEDGYSGVEVR	Unambiguous	3	2	AAH41299.1;NP_001094409.1		CID	1	0	1	1	58.18	1.50534e-05	0	26.6411	2	2	712.338	1423.67	-0.386401	56.9412	4969	4969	MS2	9/116	170306_chiba_GST_02.raw
	High	ELAEDGYSGVEVR	Unambiguous	3	2	AAH41299.1;NP_001094409.1		CID	1	0	1	1	57.91	1.60999e-05	0	38.7289	2	2	712.338	1423.67	-0.557888	59.982	5444	5444	MS2	8/116	170306_chiba_GST_02.raw
	High	AELNEFLTR	Unambiguous	3	2	AAH41299.1;NP_001094409.1		CID	1	0	1	1	55.3	5.28266e-05	0	7.28584	0	2	546.788	1092.57	-0.152299	70.5546	7074	7074	MS2	7/86	170306_chiba_GST_02.raw
	High	AELNEFLTR	Unambiguous	3	2	AAH41299.1;NP_001094409.1		CID	1	0	1	1	54.05	9.20907e-05	0	33.8758	1	2	546.788	1092.57	0.964979	73.4352	7510	7510	MS2	7/86	170306_chiba_GST_02.raw
	High	ELAEDGYSGVEVR	Unambiguous	3	2	AAH41299.1;NP_001094409.1		CID	1	0	1	1	53.73	5.29554e-05	0	41.1288	1	2	712.339	1423.67	0.642519	51.2918	4076	4076	MS2	17/116	170306_chiba_GST_02.raw
	High	AELNEFLTR	Unambiguous	3	2	AAH41299.1;NP_001094409.1		CID	1	0	1	1	53.14	0.000121322	0	8.48337	0	2	546.788	1092.57	0.406341	71.4058	7201	7201	MS2	7/86	170306_chiba_GST_02.raw
	High	AELNEFLTR	Unambiguous	3	2	AAH41299.1;NP_001094409.1		CID	1	0	1	1	52.82	0.000125897	0	18.0478	0	2	546.788	1092.57	0.629796	72.1145	7309	7309	MS2	7/86	170306_chiba_GST_02.raw
	High	AELNEFLTR	Unambiguous	3	2	AAH41299.1;NP_001094409.1		CID	1	0	1	1	52	0.000152061	0	30.9664	1	2	546.788	1092.57	0.629796	73.006	7445	7445	MS2	6/86	170306_chiba_GST_02.raw
	High	DEIVPTTPISEQK	Unambiguous	3	2	AAH41299.1;NP_001094409.1		CID	1	0	1	1	50.3	8.86592e-05	0	18.2875	0	2	728.88	1456.75	-0.204671	54.9634	4658	4658	MS2	10/118	170306_chiba_GST_02.raw
	High	KPLPDHVSIVEPK	Unambiguous	3	2	AAH41299.1;NP_001094409.1		CID	1	0	1	1	48.73	0.000160091	0	70.7854	0	3	486.949	1458.83	0.491986	48.7241	3660	3660	MS2	10/132	170306_chiba_GST_02.raw
	High	KPLPDHVSIVEPK	Unambiguous	3	2	AAH41299.1;NP_001094409.1		CID	1	0	1	1	48.06	0.000221185	0	7.01564	0	3	486.949	1458.83	-0.0100741	47.2606	3421	3421	MS2	14/132	170306_chiba_GST_02.raw
	High	FVDGLMIHSGDPVNYYVDTAVR	Unambiguous	4	2	AAH41299.1;NP_001094409.1		CID	1	0	1	1	47.91	0.000232194	0	1.09498	0	3	823.402	2468.19	0.367354	83.9768	9049	9049	MS2	18/216	170306_chiba_GST_02.raw
	High	FGFPEGSVELYAEK	Unambiguous	3	2	AAH41299.1;NP_001094409.1		CID	1	0	1	1	47.75	0.000173756	0	34.0853	100	2	786.884	1572.76	1.46384	149.18	17538	17538	MS2	11/120	170306_chiba_GST_02.raw
	High	FGFPEGSVELYAEK	Unambiguous	3	2	AAH41299.1;NP_001094409.1		CID	1	0	1	1	46.57	0.000297395	0	57.118	21	2	786.883	1572.76	0.765306	139.903	16519	16519	MS2	11/120	170306_chiba_GST_02.raw
	High	LLGGLAVR	Unambiguous	3	2	AAH41299.1;NP_001094409.1		CID	1	0	1	1	45.87	0.000170822	0	33.0071	1	2	399.763	798.519	-0.549345	61.6074	5697	5697	MS2	6/58	170306_chiba_GST_02.raw
	High	FVADGIFK	Unambiguous	3	2	AAH41299.1;NP_001094409.1		CID	1	0	1	1	44.72	0.000114678	0	12.0091	0	2	448.748	896.488	0.313822	72.7874	7411	7411	MS2	10/56	170306_chiba_GST_02.raw
	High	KPLPDHVSIVEPK	Unambiguous	3	2	AAH41299.1;NP_001094409.1		CID	1	0	1	1	44.57	0.000417223	0	7.26067	0	3	486.949	1458.83	0.491986	48.0184	3545	3545	MS2	16/132	170306_chiba_GST_02.raw
	High	FVDGLMIHSGDPVNYYVDTAVR	Unambiguous	4	2	AAH41299.1;NP_001094409.1		CID	1	0	1	1	43.96	0.00061474	0	32.4729	0	3	823.403	2468.19	1.03503	83.4418	8973	8973	MS2	21/216	170306_chiba_GST_02.raw
	High	LLGGLAVR	Unambiguous	3	2	AAH41299.1;NP_001094409.1		CID	1	0	1	1	43.7	0.000281542	0	34.1153	1	2	399.763	798.519	-1.16083	62.1461	5782	5782	MS2	6/58	170306_chiba_GST_02.raw
	High	LLGGLAVR	Unambiguous	3	2	AAH41299.1;NP_001094409.1		CID	1	0	1	1	43.6	0.0002881	0	53.2958	2	2	399.763	798.519	-0.549345	62.8766	5897	5897	MS2	6/58	170306_chiba_GST_02.raw
	High	LLGGLAVR	Unambiguous	3	2	AAH41299.1;NP_001094409.1		CID	1	0	1	1	43.46	0.000297539	0	58.3422	2	2	399.763	798.519	-1.08439	62.7554	5878	5878	MS2	6/58	170306_chiba_GST_02.raw
	High	DEIVPTTPISEQK	Unambiguous	3	2	AAH41299.1;NP_001094409.1		CID	1	0	1	1	42.25	0.000565879	0	13.9033	0	2	728.88	1456.75	-0.0370782	55.7773	4786	4786	MS2	10/118	170306_chiba_GST_02.raw
	High	GAKPDQPQPPVMPQPVATA	Unambiguous	2	1	AAH41299.1		CID	1	0	1	1	42.13	0.000854229	0	9.52324	1	2	964.999	1928.99	0.0977731	54.9019	4649	4649	MS2	20/192	170306_chiba_GST_02.raw
	High	TEIIILATR	Unambiguous	2	2	AAH41299.1;NP_001094409.1		CID	1	0	1	1	41.09	0.000879181	0	67.66	1	2	515.32	1029.63	1.51728	76.5834	7975	7975	MS2	6/78	170306_chiba_GST_02.raw
	High	ImLPWDPSGK	Unambiguous	3	2	AAH41299.1;NP_001094409.1	M2(Oxidation)	CID	1	0	1	1	40.52	0.00122871	0	14.2541	0	2	580.295	1159.58	0.452421	81.171	8644	8644	MS2	10/76	170306_chiba_GST_02.raw
	High	TQNVLGEK	Unambiguous	3	2	AAH41299.1;NP_001094409.1		CID	1	0	1	1	40.38	0.00362365	0	4.4072	0	2	444.743	888.479	0.208254	44.8388	3020	3020	MS2	6/80	170306_chiba_GST_02.raw
	High	IMLPWDPSGK	Unambiguous	3	2	AAH41299.1;NP_001094409.1		CID	1	0	1	1	39.68	0.000775055	0	5.32694	0	2	572.297	1143.59	-0.145026	86.6605	9428	9428	MS2	12/76	170306_chiba_GST_02.raw
	High	GAKPDQPQPPVMPQPVATA	Unambiguous	2	1	AAH41299.1		CID	1	0	1	1	39.36	0.0016107	0	1.48872	0	2	964.999	1928.99	0.0344912	56.455	4893	4893	MS2	14/192	170306_chiba_GST_02.raw
	High	FIMESGAK	Unambiguous	3	2	AAH41299.1;NP_001094409.1		CID	1	0	1	1	38.51	0.00114857	0	10.5561	0	2	441.723	882.439	-0.14837	48.1343	3564	3564	MS2	7/58	170306_chiba_GST_02.raw
	High	AELNEFLTR	Unambiguous	3	2	AAH41299.1;NP_001094409.1		CID	1	0	1	1	38.36	0.00364704	0	32.253	1	2	546.788	1092.57	0.406341	74.0127	7594	7594	MS2	7/86	170306_chiba_GST_02.raw
	High	ELAEDGYSGVEVR	Unambiguous	3	2	AAH41299.1;NP_001094409.1		CID	1	0	1	1	37.61	0.00216725	0	61.8269	1	2	712.339	1423.67	0.299546	58.1195	5153	5153	MS2	9/116	170306_chiba_GST_02.raw
	High	KFVADGIFK	Unambiguous	3	2	AAH41299.1;NP_001094409.1		CID	1	0	1	1	37.44	0.000640071	1	40.2229	0	2	512.795	1024.58	-0.0821505	58.8353	5265	5265	MS2	11/80	170306_chiba_GST_02.raw
	High	FVDGLMIHSGDPVNYYVDTAVR	Unambiguous	4	2	AAH41299.1;NP_001094409.1		CID	1	0	1	1	36.4	0.00323012	0	44.784	1	3	823.402	2468.19	0.0706096	85.6694	9290	9290	MS2	26/216	170306_chiba_GST_02.raw
	High	KFVADGIFK	Unambiguous	3	2	AAH41299.1;NP_001094409.1		CID	1	0	1	1	35.83	0.00107099	1	20.7451	0	2	512.795	1024.58	0.394415	59.6233	5388	5388	MS2	11/80	170306_chiba_GST_02.raw
	High	FVADGIFK	Unambiguous	3	2	AAH41299.1;NP_001094409.1		CID	1	0	1	1	32.16	0.00240213	0	13.6791	0	2	448.747	896.487	-0.298921	72.0008	7291	7291	MS2	6/56	170306_chiba_GST_02.raw
	High	IMLPWDPSGK	Unambiguous	3	2	AAH41299.1;NP_001094409.1		CID	1	0	1	1	31.22	0.00483259	0	33.65	0	2	572.297	1143.59	0.175204	87.5629	9558	9558	MS2	11/76	170306_chiba_GST_02.raw
	High	FVDGLMIHSGDPVNYYVDTAVR	Unambiguous	4	2	AAH41299.1;NP_001094409.1		CID	1	0	1	1	29.95	0.0151737	0	30.2868	1	3	823.403	2468.19	0.960842	85.4293	9256	9256	MS2	16/216	170306_chiba_GST_02.raw
	High	FVDGLMIHSGDPVNYYVDTAVR	Unambiguous	4	2	AAH41299.1;NP_001094409.1		CID	1	0	1	1	29.82	0.0149573	0	29.8639	1	3	823.403	2468.19	0.738284	86.1675	9359	9359	MS2	26/216	170306_chiba_GST_02.raw
NP_001094409.1	40S ribosomal protein S3-A [Xenopus laevis]	2732.6	71.95	2	1	17	70	246	26.9846	9.65674
	Confidence Level	Sequence	PSM Ambiguity	# Proteins	# Protein Groups	Protein Group Accessions	Modifications	Activation Type	ΔScore	ΔCn	Rank	Search Engine Rank	IonScore	Exp Value	# Missed Cleavages	Isolation Interference [%]	Ion Inject Time [ms]	Charge	m/z [Da]	MH+ [Da]	ΔM [ppm]	RT [min]	First Scan	Last Scan	MS Order	Ions Matched	Spectrum File
	High	GLCAIAQAESLR	Unambiguous	3	2	AAH41299.1;NP_001094409.1		CID	1	0	1	1	88.51	2.05756e-08	0	24.2709	0	2	616.327	1231.65	0.205208	72.006	7292	7292	MS2	10/100	170306_chiba_GST_02.raw
	High	GLCAIAQAESLR	Unambiguous	3	2	AAH41299.1;NP_001094409.1		CID	1	0	1	1	88.29	2.16448e-08	0	6.62766	0	2	616.327	1231.65	0.205208	71.2661	7180	7180	MS2	9/100	170306_chiba_GST_02.raw
	High	FGFPEGSVELYAEK	Unambiguous	3	2	AAH41299.1;NP_001094409.1		CID	1	0	1	1	84.9	4.83773e-08	0	4.68565	0	2	786.883	1572.76	0.299614	81.2097	8649	8649	MS2	11/120	170306_chiba_GST_02.raw
	High	ELAEDGYSGVEVR	Unambiguous	3	2	AAH41299.1;NP_001094409.1		CID	1	0	1	1	79.03	1.28152e-07	0	7.42634	0	2	712.339	1423.67	-0.0434274	52.7294	4306	4306	MS2	9/116	170306_chiba_GST_02.raw
	High	ELAEDGYSGVEVR	Unambiguous	3	2	AAH41299.1;NP_001094409.1		CID	1	0	1	1	79.02	1.24061e-07	0	9.47676	2	2	712.338	1423.67	-0.472145	62.0673	5770	5770	MS2	9/116	170306_chiba_GST_02.raw
	High	ELAEDGYSGVEVR	Unambiguous	3	2	AAH41299.1;NP_001094409.1		CID	1	0	1	1	78.18	1.52055e-07	0	1.93114	0	2	712.337	1423.67	-1.7583	51.9003	4173	4173	MS2	9/116	170306_chiba_GST_02.raw
	High	FVDGLMIHSGDPVNYYVDTAVR	Unambiguous	4	2	AAH41299.1;NP_001094409.1		CID	1	0	1	1	78.12	2.21234e-07	0	11.2798	0	2	1234.6	2468.19	0.743732	84.0133	9054	9054	MS2	13/216	170306_chiba_GST_02.raw
	High	ELAEDGYSGVEVR	Unambiguous	3	2	AAH41299.1;NP_001094409.1		CID	1	0	1	1	76.33	2.31645e-07	0	11.9149	2	2	712.339	1423.67	-0.129171	61.7943	5727	5727	MS2	9/116	170306_chiba_GST_02.raw
	High	ELAEDGYSGVEVR	Unambiguous	3	2	AAH41299.1;NP_001094409.1		CID	1	0	1	1	73.3	4.79429e-07	0	0	1	2	712.339	1423.67	0.042316	55.164	4690	4690	MS2	9/116	170306_chiba_GST_02.raw
	High	KPLPDHVSIVEPK	Unambiguous	3	2	AAH41299.1;NP_001094409.1		CID	1	0	1	1	73.25	5.65416e-07	0	11.0751	0	2	729.92	1458.83	0.856829	47.439	3450	3450	MS2	11/132	170306_chiba_GST_02.raw
	High	ELAEDGYSGVEVR	Unambiguous	3	2	AAH41299.1;NP_001094409.1		CID	1	0	1	1	73.17	4.79538e-07	0	26.281	1	2	712.339	1423.67	-0.129171	54.2346	4543	4543	MS2	9/116	170306_chiba_GST_02.raw
	High	ELAEDGYSGVEVR	Unambiguous	3	2	AAH41299.1;NP_001094409.1		CID	1	0	1	1	72.8	5.22183e-07	0	19.0243	2	2	712.339	1423.67	-0.214914	62.3445	5813	5813	MS2	9/116	170306_chiba_GST_02.raw
	High	ELAEDGYSGVEVR	Unambiguous	3	2	AAH41299.1;NP_001094409.1		CID	1	0	1	1	72.76	6.62079e-07	0	17.657	2	2	712.339	1423.67	0.556776	56.6631	4926	4926	MS2	9/116	170306_chiba_GST_02.raw
	High	GLCAIAQAESLR	Unambiguous	3	2	AAH41299.1;NP_001094409.1		CID	1	0	1	1	71.82	9.6018e-07	0	24.2691	1	2	616.327	1231.65	0.205208	72.2921	7336	7336	MS2	10/100	170306_chiba_GST_02.raw
	High	ELAEDGYSGVEVR	Unambiguous	3	2	AAH41299.1;NP_001094409.1		CID	1	0	1	1	71.36	7.27483e-07	0	0	1	2	712.339	1423.67	-0.129171	55.023	4668	4668	MS2	9/116	170306_chiba_GST_02.raw
	High	ELAEDGYSGVEVR	Unambiguous	3	2	AAH41299.1;NP_001094409.1		CID	1	0	1	1	71.17	7.56197e-07	0	37.9861	2	2	712.338	1423.67	-0.300658	56.7568	4941	4941	MS2	9/116	170306_chiba_GST_02.raw
	High	ELAEDGYSGVEVR	Unambiguous	3	2	AAH41299.1;NP_001094409.1		CID	1	0	1	1	69.9	1.27912e-06	0	36.5328	2	2	712.339	1423.67	0.471033	56.5312	4905	4905	MS2	9/116	170306_chiba_GST_02.raw
	High	ELAEDGYSGVEVR	Unambiguous	3	2	AAH41299.1;NP_001094409.1		CID	1	0	1	1	68.69	1.69009e-06	0	0	1	2	712.339	1423.67	0.385289	53.5606	4437	4437	MS2	9/116	170306_chiba_GST_02.raw
	High	FGFPEGSVELYAEK	Unambiguous	3	2	AAH41299.1;NP_001094409.1		CID	1	0	1	1	67.7	2.29263e-06	0	15.6905	0	2	786.883	1572.76	0.53246	82.0905	8778	8778	MS2	12/120	170306_chiba_GST_02.raw
	High	RFGFPEGSVELYAEK	Unambiguous	3	2	AAH41299.1;NP_001094409.1		CID	1	0	1	1	67.38	3.32714e-06	1	9.11313	1	2	864.934	1728.86	0.52851	74.9814	7738	7738	MS2	12/156	170306_chiba_GST_02.raw
	High	ELAEDGYSGVEVR	Unambiguous	3	2	AAH41299.1;NP_001094409.1		CID	1	0	1	1	66.24	2.43626e-06	0	24.3871	3	2	712.339	1423.67	-0.0434274	60.6071	5541	5541	MS2	9/116	170306_chiba_GST_02.raw
	High	TEIIILATR	Unambiguous	2	2	AAH41299.1;NP_001094409.1		CID	1	0	1	1	65.4	3.3599e-06	0	4.68716	0	2	515.319	1029.63	0.213147	74.3378	7642	7642	MS2	7/78	170306_chiba_GST_02.raw
	High	LLGGLAVR	Unambiguous	3	2	AAH41299.1;NP_001094409.1		CID	1	0	1	1	63.94	2.66406e-06	0	20.7095	0	2	399.763	798.52	0.0621388	60.067	5457	5457	MS2	7/58	170306_chiba_GST_02.raw
	High	GCEVVVSGK	Unambiguous	3	2	AAH41299.1;NP_001094409.1		CID	1	0	1	1	63.92	7.31943e-06	0	10.1269	0	2	439.226	877.445	0.115737	45.2464	3087	3087	MS2	12/72	170306_chiba_GST_02.raw
	High	LLGGLAVR	Unambiguous	3	2	AAH41299.1;NP_001094409.1		CID	1	0	1	1	63.57	2.90097e-06	0	5.60846	0	2	399.763	798.519	-0.472909	60.8032	5570	5570	MS2	7/58	170306_chiba_GST_02.raw
	High	ELAEDGYSGVEVR	Unambiguous	3	2	AAH41299.1;NP_001094409.1		CID	1	0	1	1	60.83	8.21908e-06	0	6.62905	2	2	712.339	1423.67	-0.214914	61.9478	5751	5751	MS2	8/116	170306_chiba_GST_02.raw
	High	TEIIILATR	Unambiguous	2	2	AAH41299.1;NP_001094409.1		CID	1	0	1	1	59.7	1.1626e-05	0	16.7032	0	2	515.319	1029.63	0.568819	75.2291	7774	7774	MS2	7/78	170306_chiba_GST_02.raw
	High	TEIIILATR	Unambiguous	2	2	AAH41299.1;NP_001094409.1		CID	1	0	1	1	59.49	1.2202e-05	0	23.555	0	2	515.319	1029.63	0.805934	73.4803	7516	7516	MS2	7/78	170306_chiba_GST_02.raw
	High	KPLPDHVSIVEPK	Unambiguous	3	2	AAH41299.1;NP_001094409.1		CID	1	0	1	1	59.41	1.36889e-05	0	9.7388	0	2	729.92	1458.83	0.438446	48.1847	3573	3573	MS2	11/132	170306_chiba_GST_02.raw
	High	FVDGLMIHSGDPVNYYVDTAVR	Unambiguous	4	2	AAH41299.1;NP_001094409.1		CID	1	0	1	1	58.54	2.00841e-05	0	10.1366	0	3	823.403	2468.19	0.664098	84.875	9178	9178	MS2	20/216	170306_chiba_GST_02.raw
	High	RFGFPEGSVELYAEK	Unambiguous	3	2	AAH41299.1;NP_001094409.1		CID	1	0	1	1	58.27	2.86702e-05	1	20.9283	0	3	576.958	1728.86	0.238303	74.919	7728	7728	MS2	9/156	170306_chiba_GST_02.raw
	High	ELAEDGYSGVEVR	Unambiguous	3	2	AAH41299.1;NP_001094409.1		CID	1	0	1	1	58.18	1.50534e-05	0	26.6411	2	2	712.338	1423.67	-0.386401	56.9412	4969	4969	MS2	9/116	170306_chiba_GST_02.raw
	High	ELAEDGYSGVEVR	Unambiguous	3	2	AAH41299.1;NP_001094409.1		CID	1	0	1	1	57.91	1.60999e-05	0	38.7289	2	2	712.338	1423.67	-0.557888	59.982	5444	5444	MS2	8/116	170306_chiba_GST_02.raw
	High	AELNEFLTR	Unambiguous	3	2	AAH41299.1;NP_001094409.1		CID	1	0	1	1	55.3	5.28266e-05	0	7.28584	0	2	546.788	1092.57	-0.152299	70.5546	7074	7074	MS2	7/86	170306_chiba_GST_02.raw
	High	AELNEFLTR	Unambiguous	3	2	AAH41299.1;NP_001094409.1		CID	1	0	1	1	54.05	9.20907e-05	0	33.8758	1	2	546.788	1092.57	0.964979	73.4352	7510	7510	MS2	7/86	170306_chiba_GST_02.raw
	High	ELAEDGYSGVEVR	Unambiguous	3	2	AAH41299.1;NP_001094409.1		CID	1	0	1	1	53.73	5.29554e-05	0	41.1288	1	2	712.339	1423.67	0.642519	51.2918	4076	4076	MS2	17/116	170306_chiba_GST_02.raw
	High	AELNEFLTR	Unambiguous	3	2	AAH41299.1;NP_001094409.1		CID	1	0	1	1	53.14	0.000121322	0	8.48337	0	2	546.788	1092.57	0.406341	71.4058	7201	7201	MS2	7/86	170306_chiba_GST_02.raw
	High	AELNEFLTR	Unambiguous	3	2	AAH41299.1;NP_001094409.1		CID	1	0	1	1	52.82	0.000125897	0	18.0478	0	2	546.788	1092.57	0.629796	72.1145	7309	7309	MS2	7/86	170306_chiba_GST_02.raw
	High	AELNEFLTR	Unambiguous	3	2	AAH41299.1;NP_001094409.1		CID	1	0	1	1	52	0.000152061	0	30.9664	1	2	546.788	1092.57	0.629796	73.006	7445	7445	MS2	6/86	170306_chiba_GST_02.raw
	High	DEIVPTTPISEQK	Unambiguous	3	2	AAH41299.1;NP_001094409.1		CID	1	0	1	1	50.3	8.86592e-05	0	18.2875	0	2	728.88	1456.75	-0.204671	54.9634	4658	4658	MS2	10/118	170306_chiba_GST_02.raw
	High	KPLPDHVSIVEPK	Unambiguous	3	2	AAH41299.1;NP_001094409.1		CID	1	0	1	1	48.73	0.000160091	0	70.7854	0	3	486.949	1458.83	0.491986	48.7241	3660	3660	MS2	10/132	170306_chiba_GST_02.raw
	High	KPLPDHVSIVEPK	Unambiguous	3	2	AAH41299.1;NP_001094409.1		CID	1	0	1	1	48.06	0.000221185	0	7.01564	0	3	486.949	1458.83	-0.0100741	47.2606	3421	3421	MS2	14/132	170306_chiba_GST_02.raw
	High	FVDGLMIHSGDPVNYYVDTAVR	Unambiguous	4	2	AAH41299.1;NP_001094409.1		CID	1	0	1	1	47.91	0.000232194	0	1.09498	0	3	823.402	2468.19	0.367354	83.9768	9049	9049	MS2	18/216	170306_chiba_GST_02.raw
	High	FGFPEGSVELYAEK	Unambiguous	3	2	AAH41299.1;NP_001094409.1		CID	1	0	1	1	47.75	0.000173756	0	34.0853	100	2	786.884	1572.76	1.46384	149.18	17538	17538	MS2	11/120	170306_chiba_GST_02.raw
	High	FGFPEGSVELYAEK	Unambiguous	3	2	AAH41299.1;NP_001094409.1		CID	1	0	1	1	46.57	0.000297395	0	57.118	21	2	786.883	1572.76	0.765306	139.903	16519	16519	MS2	11/120	170306_chiba_GST_02.raw
	High	LLGGLAVR	Unambiguous	3	2	AAH41299.1;NP_001094409.1		CID	1	0	1	1	45.87	0.000170822	0	33.0071	1	2	399.763	798.519	-0.549345	61.6074	5697	5697	MS2	6/58	170306_chiba_GST_02.raw
	High	AAKPDQPQPPAMPQPVATA	Unambiguous	1	1	NP_001094409.1		CID	1	0	1	1	45.5	0.000446714	0	15.0738	0	2	957.991	1914.97	-0.0796917	52.9554	4341	4341	MS2	11/192	170306_chiba_GST_02.raw
	High	FVADGIFK	Unambiguous	3	2	AAH41299.1;NP_001094409.1		CID	1	0	1	1	44.72	0.000114678	0	12.0091	0	2	448.748	896.488	0.313822	72.7874	7411	7411	MS2	10/56	170306_chiba_GST_02.raw
[truncated: 7,809 more rows]
