# Supplementary material for: The termination of UHRF1-dependent PAF15 ubiquitin signaling is regulated by USP7 and ATAD5
Source: eLife. 2023 Feb 3;12:e79013. doi: 10.7554/eLife.79013 (PMC9943068; doi:10.7554/eLife.79013)
Supplement: Supplementary file 2. [file elife-79013-supp2.xlsx]

## Sheet: Sheet1
Supplementary Table 2: MS-based quantification of xPAF15 interacting proteins
Accession	Description	Score	Coverage	# Proteins	# Unique Peptides	# Peptides	# PSMs	# AAs	MW [kDa]	calc. pI
NP_001082364.1	Proliferating cell nuclear antigen-like [Xenopus laevis]	46302.8	83.14	1	1	18	962	261	28.7903	4.65283
	Confidence Level	Sequence	PSM Ambiguity	# Proteins	# Protein Groups	Protein Group Accessions	Modifications	Activation Type	ΔScore	ΔCn	Rank	Search Engine Rank	IonScore	Exp Value	# Missed Cleavages	Isolation Interference [%]	Ion Inject Time [ms]	Charge	m/z [Da]	MH+ [Da]	ΔM [ppm]	RT [min]	First Scan	Last Scan	MS Order	Ions Matched	Spectrum File
	High	AEDNADTVTMVFESPNQEK	Unambiguous	4	2	NP_001081011.1;NP_001082364.1		CID	1	0	1	1	143.61	1.85093e-14	0	16.7245	1	2	1062.97	2124.94	-0.620988	77.6052	8273	8273	MS2	14/206	170307_chiba_PAF15_02.raw
	High	ATPLSPTVILSMSADIPLVVEYK	Unambiguous	3	2	NP_001081011.1;NP_001082364.1		CID	1	0	1	1	129.75	8.26218e-13	0	5.69096	0	2	1222.67	2444.34	0.478805	130.396	15424	15424	MS2	15/214	170307_chiba_PAF15_02.raw
	High	ATPLSPTVILSMSADIPLVVEYK	Unambiguous	3	2	NP_001081011.1;NP_001082364.1		CID	1	0	1	1	127.68	1.33074e-12	0	10.1141	5	2	1222.67	2444.34	0.279045	154.364	18418	18418	MS2	14/214	170307_chiba_PAF15_02.raw
	High	DLSQIGDAVVISCAK	Unambiguous	4	2	NP_001081011.1;NP_001082364.1		CID	1	0	1	1	127	3.13256e-12	0	4.18968	0	2	759.895	1518.78	-0.194048	85.4053	9376	9376	MS2	20/156	170307_chiba_PAF15_02.raw
	High	DLSQIGDAVVISCAK	Unambiguous	4	2	NP_001081011.1;NP_001082364.1		CID	1	0	1	1	125.6	3.77329e-12	0	6.35047	0	2	759.895	1518.78	-0.917413	87.4108	9650	9650	MS2	20/156	170307_chiba_PAF15_02.raw
	High	DLSQIGDAVVISCAK	Unambiguous	4	2	NP_001081011.1;NP_001082364.1		CID	1	0	1	1	124.7	4.64216e-12	0	3.42443	0	2	759.895	1518.78	-0.917413	86.1886	9481	9481	MS2	11/156	170307_chiba_PAF15_02.raw
	High	DLSQIGDAVVISCAK	Unambiguous	4	2	NP_001081011.1;NP_001082364.1		CID	1	0	1	1	124.64	5.73742e-12	0	4.57198	0	2	759.895	1518.78	0.127447	84.5055	9250	9250	MS2	11/156	170307_chiba_PAF15_02.raw
	High	DLSQIGDAVVISCAK	Unambiguous	4	2	NP_001081011.1;NP_001082364.1		CID	1	0	1	1	123.61	6.79399e-12	0	14.6952	0	2	759.894	1518.78	-1.31928	86.6482	9544	9544	MS2	23/156	170307_chiba_PAF15_02.raw
	High	ATPLSPTVILSMSADIPLVVEYK	Unambiguous	3	2	NP_001081011.1;NP_001082364.1		CID	1	0	1	1	120.48	6.89431e-12	0	5.51287	4	2	1222.67	2444.34	0.878325	150.264	17960	17960	MS2	12/214	170307_chiba_PAF15_02.raw
	High	DLSQIGDAVVISCAK	Unambiguous	4	2	NP_001081011.1;NP_001082364.1		CID	1	0	1	1	119.89	1.61027e-11	0	10.7159	0	2	759.895	1518.78	-0.194048	89.9773	10008	10008	MS2	20/156	170307_chiba_PAF15_02.raw
	High	FSASGELGTGNVK	Unambiguous	4	2	NP_001081011.1;NP_001082364.1		CID	1	0	1	1	119.7	1.57513e-11	0	12.1697	1	2	633.82	1266.63	0.0747321	132.002	15637	15637	MS2	11/114	170307_chiba_PAF15_02.raw
	High	FSASGELGTGNVK	Unambiguous	4	2	NP_001081011.1;NP_001082364.1		CID	1	0	1	1	119.52	1.69205e-11	0	16.5162	1	2	633.82	1266.63	-0.118016	116.195	13539	13539	MS2	11/114	170307_chiba_PAF15_02.raw
	High	AEDNADTVTMVFESPNQEK	Unambiguous	4	2	NP_001081011.1;NP_001082364.1		CID	1	0	1	1	114.55	1.4907e-11	0	0	1	2	1062.97	2124.94	-0.735881	75.4338	7956	7956	MS2	23/206	170307_chiba_PAF15_02.raw
	High	FSASGELGTGNVK	Unambiguous	4	2	NP_001081011.1;NP_001082364.1		CID	1	0	1	1	114.41	6.84639e-11	0	5.92992	2	2	633.82	1266.63	0.363854	138.361	16477	16477	MS2	10/114	170307_chiba_PAF15_02.raw
	High	AEDNADTVTMVFESPNQEK	Unambiguous	4	2	NP_001081011.1;NP_001082364.1		CID	1	0	1	1	114.29	1.75024e-11	0	28.6635	1	2	1062.97	2124.94	-0.506095	84.7337	9283	9283	MS2	23/206	170307_chiba_PAF15_02.raw
	High	AEDNADTVTMVFESPNQEK	Unambiguous	4	2	NP_001081011.1;NP_001082364.1		CID	1	0	1	1	114.22	1.58946e-11	0	34.9795	38	2	1062.97	2124.94	0.183263	150.745	18013	18013	MS2	23/206	170307_chiba_PAF15_02.raw
	High	ATPLSPTVILSMSADIPLVVEYK	Unambiguous	3	2	NP_001081011.1;NP_001082364.1		CID	1	0	1	1	113.73	3.17732e-11	0	4.34117	0	2	1222.67	2444.34	-0.120475	124.871	14689	14689	MS2	12/214	170307_chiba_PAF15_02.raw
	High	ATPLSPTVILSMSADIPLVVEYK	Unambiguous	3	2	NP_001081011.1;NP_001082364.1		CID	1	0	1	1	113.4	3.56529e-11	0	7.38924	0	2	1222.67	2444.34	0.478805	124.077	14584	14584	MS2	12/214	170307_chiba_PAF15_02.raw
	High	DLSQIGDAVVISCAK	Unambiguous	4	2	NP_001081011.1;NP_001082364.1		CID	1	0	1	1	112.89	8.35321e-11	0	8.82855	0	2	759.895	1518.78	-0.515543	88.1768	9756	9756	MS2	11/156	170307_chiba_PAF15_02.raw
	High	FSASGELGTGNVK	Unambiguous	4	2	NP_001081011.1;NP_001082364.1		CID	1	0	1	1	112.1	8.04656e-11	0	0	10	2	633.82	1266.63	-0.503512	153.691	18341	18341	MS2	11/114	170307_chiba_PAF15_02.raw
	High	DLSQIGDAVVISCAK	Unambiguous	4	2	NP_001081011.1;NP_001082364.1		CID	1	0	1	1	111.17	1.04646e-10	0	5.51093	0	2	759.895	1518.78	-0.837039	83.9459	9168	9168	MS2	19/156	170307_chiba_PAF15_02.raw
	High	ATPLSPTVILSMSADIPLVVEYK	Unambiguous	3	2	NP_001081011.1;NP_001082364.1		CID	1	0	1	1	110.91	6.3255e-11	0	7.058	0	2	1222.67	2444.34	0.378925	126.449	14899	14899	MS2	14/214	170307_chiba_PAF15_02.raw
	High	ATPLSPTVILSMSADIPLVVEYK	Unambiguous	3	2	NP_001081011.1;NP_001082364.1		CID	1	0	1	1	110.86	6.31671e-11	0	14.243	18	2	1222.67	2444.34	0.878325	152.434	18207	18207	MS2	14/214	170307_chiba_PAF15_02.raw
	High	AEDNADTVTMVFESPNQEK	Unambiguous	4	2	NP_001081011.1;NP_001082364.1		CID	1	0	1	1	110.84	3.91466e-11	0	3.91385	1	2	1062.97	2124.94	-0.276309	76.7476	8148	8148	MS2	22/206	170307_chiba_PAF15_02.raw
	High	ATPLSPTVILSMSADIPLVVEYK	Unambiguous	3	2	NP_001081011.1;NP_001082364.1		CID	1	0	1	1	110.68	6.66952e-11	0	10.4685	0	2	1222.67	2444.34	0.378925	142.006	16957	16957	MS2	14/214	170307_chiba_PAF15_02.raw
	High	ATPLSPTVILSMSADIPLVVEYK	Unambiguous	3	2	NP_001081011.1;NP_001082364.1		CID	1	0	1	1	110.53	6.9039e-11	0	5.27302	0	2	1222.67	2444.34	0.378925	138.823	16538	16538	MS2	14/214	170307_chiba_PAF15_02.raw
	High	ATPLSPTVILSMSADIPLVVEYK	Unambiguous	3	2	NP_001081011.1;NP_001082364.1		CID	1	0	1	1	109.57	8.28059e-11	0	16.8898	0	2	1222.67	2444.34	-0.0205953	110.182	12737	12737	MS2	13/214	170307_chiba_PAF15_02.raw
	High	FSASGELGTGNVK	Unambiguous	4	2	NP_001081011.1;NP_001082364.1		CID	1	0	1	1	108.7	1.7604e-10	0	11.208	1	2	633.82	1266.63	-0.503512	133.583	15848	15848	MS2	11/114	170307_chiba_PAF15_02.raw
	High	CAAGEDIITLR	Unambiguous	1	1	NP_001082364.1		CID	1	0	1	1	108.64	2.17469e-10	0	9.99739	0	2	581.3	1161.59	0.111991	56.4546	5218	5218	MS2	18/88	170307_chiba_PAF15_02.raw
	High	FSASGELGTGNVK	Unambiguous	4	2	NP_001081011.1;NP_001082364.1		CID	1	0	1	1	108.44	1.86901e-10	0	9.58695	0	2	633.819	1266.63	-0.792634	60.3029	5788	5788	MS2	11/114	170307_chiba_PAF15_02.raw
	High	FSASGELGTGNVK	Unambiguous	4	2	NP_001081011.1;NP_001082364.1		CID	1	0	1	1	108.27	2.77766e-10	0	4.01444	10	2	633.821	1266.63	1.13484	149.883	17919	17919	MS2	10/114	170307_chiba_PAF15_02.raw
	High	FSASGELGTGNVK	Unambiguous	4	2	NP_001081011.1;NP_001082364.1		CID	1	0	1	1	108.13	2.4149e-10	0	13.7717	0	2	633.82	1266.63	-0.310764	71.3635	7386	7386	MS2	10/114	170307_chiba_PAF15_02.raw
	High	ATPLSPTVILSMSADIPLVVEYK	Unambiguous	3	2	NP_001081011.1;NP_001082364.1		CID	1	0	1	1	108.06	1.21926e-10	0	9.93825	18	2	1222.67	2444.33	-1.0194	153.211	18293	18293	MS2	12/214	170307_chiba_PAF15_02.raw
	High	ATPLSPTVILSMSADIPLVVEYK	Unambiguous	3	2	NP_001081011.1;NP_001082364.1		CID	1	0	1	1	108.04	1.22488e-10	0	6.82852	0	2	1222.67	2444.34	0.478805	131.98	15634	15634	MS2	15/214	170307_chiba_PAF15_02.raw
	High	ATPLSPTVILSMSADIPLVVEYK	Unambiguous	3	2	NP_001081011.1;NP_001082364.1		CID	1	0	1	1	107.93	9.90547e-11	0	6.86448	3	2	1222.67	2444.34	1.87712	147.75	17688	17688	MS2	14/214	170307_chiba_PAF15_02.raw
	High	ATPLSPTVILSMSADIPLVVEYK	Unambiguous	3	2	NP_001081011.1;NP_001082364.1		CID	1	0	1	1	107.91	1.24592e-10	0	4.47436	1	2	1222.67	2444.34	0.878325	146.032	17477	17477	MS2	14/214	170307_chiba_PAF15_02.raw
	High	ATPLSPTVILSMSADIPLVVEYK	Unambiguous	3	2	NP_001081011.1;NP_001082364.1		CID	1	0	1	1	107.91	1.24592e-10	0	6.9526	0	2	1222.67	2444.34	1.07809	140.416	16747	16747	MS2	14/214	170307_chiba_PAF15_02.raw
	High	ATPLSPTVILSMSADIPLVVEYK	Unambiguous	3	2	NP_001081011.1;NP_001082364.1		CID	1	0	1	1	107.85	1.24685e-10	0	4.82936	3	2	1222.67	2444.34	1.17797	148.652	17792	17792	MS2	14/214	170307_chiba_PAF15_02.raw
	High	ATPLSPTVILSMSADIPLVVEYK	Unambiguous	3	2	NP_001081011.1;NP_001082364.1		CID	1	0	1	1	107.4	1.42847e-10	0	5.57682	8	2	1222.67	2444.34	0.678565	152.567	18222	18222	MS2	14/214	170307_chiba_PAF15_02.raw
	High	FSASGELGTGNVK	Unambiguous	4	2	NP_001081011.1;NP_001082364.1		CID	1	0	1	1	107.17	2.84922e-10	0	2.90686	1	2	633.82	1266.63	-0.407138	135.183	16058	16058	MS2	11/114	170307_chiba_PAF15_02.raw
	High	FSASGELGTGNVK	Unambiguous	4	2	NP_001081011.1;NP_001082364.1		CID	1	0	1	1	107.17	2.90678e-10	0	18.8189	2	2	633.82	1266.63	-0.21439	143.162	17108	17108	MS2	11/114	170307_chiba_PAF15_02.raw
	High	FSASGELGTGNVK	Unambiguous	4	2	NP_001081011.1;NP_001082364.1		CID	1	0	1	1	107.06	3.93577e-10	0	8.63923	10	2	633.82	1266.63	0.942096	148.275	17751	17751	MS2	11/114	170307_chiba_PAF15_02.raw
	High	LSQTSNVDKEEEAVTIEMNEPVQLTFALR	Unambiguous	4	2	NP_001081011.1;NP_001082364.1		CID	1	0	1	1	105.75	2.50108e-10	1	28.0183	0	2	1646.33	3291.65	1.6116	90.9443	10141	10141	MS2	13/322	170307_chiba_PAF15_02.raw
	High	FSASGELGTGNVK	Unambiguous	4	2	NP_001081011.1;NP_001082364.1		CID	1	0	1	1	105.65	4.04321e-10	0	7.90926	2	2	633.82	1266.63	-0.407138	154.524	18440	18440	MS2	11/114	170307_chiba_PAF15_02.raw
	High	LSQTSNVDKEEEAVTIEMNEPVQLTFALR	Unambiguous	4	2	NP_001081011.1;NP_001082364.1		CID	1	0	1	1	105.64	1.92393e-10	1	50.7767	2	2	1646.33	3291.65	1.53743	108.722	12542	12542	MS2	13/322	170307_chiba_PAF15_02.raw
	High	FSASGELGTGNVK	Unambiguous	4	2	NP_001081011.1;NP_001082364.1		CID	1	0	1	1	105.49	3.68647e-10	0	8.05331	1	2	633.82	1266.63	-0.503512	128.044	15114	15114	MS2	11/114	170307_chiba_PAF15_02.raw
	High	LSQTSNVDKEEEAVTIEMNEPVQLTFALR	Unambiguous	4	2	NP_001081011.1;NP_001082364.1		CID	1	0	1	1	105.15	2.67306e-10	1	51.0496	1	2	1646.32	3291.64	-1.94856	96.9615	10957	10957	MS2	12/322	170307_chiba_PAF15_02.raw
	High	ATPLSPTVILSMSADIPLVVEYK	Unambiguous	3	2	NP_001081011.1;NP_001082364.1		CID	1	0	1	1	104.78	2.49495e-10	0	8.55716	0	2	1222.67	2444.34	0.0792848	128.007	15109	15109	MS2	14/214	170307_chiba_PAF15_02.raw
	High	FSASGELGTGNVK	Unambiguous	4	2	NP_001081011.1;NP_001082364.1		CID	1	0	1	1	104.71	5.12168e-10	0	7.98862	1	2	633.82	1266.63	-0.21439	130.419	15427	15427	MS2	11/114	170307_chiba_PAF15_02.raw
	High	DLSQIGDAVVISCAK	Unambiguous	4	2	NP_001081011.1;NP_001082364.1		CID	1	0	1	1	104.64	5.73742e-10	0	37.1101	11	2	759.896	1518.78	0.288194	147.107	17610	17610	MS2	11/156	170307_chiba_PAF15_02.raw
	High	ATPLSPTVILSMSADIPLVVEYK	Unambiguous	3	2	NP_001081011.1;NP_001082364.1		CID	1	0	1	1	104.54	2.70702e-10	0	8.15321	0	2	1222.67	2444.34	1.07809	138.022	16432	16432	MS2	14/214	170307_chiba_PAF15_02.raw
	High	FSASGELGTGNVK	Unambiguous	4	2	NP_001081011.1;NP_001082364.1		CID	1	0	1	1	104.34	5.4115e-10	0	9.85299	0	2	633.82	1266.63	0.0747321	60.036	5747	5747	MS2	11/114	170307_chiba_PAF15_02.raw
	High	DLSQIGDAVVISCAK	Unambiguous	4	2	NP_001081011.1;NP_001082364.1		CID	1	0	1	1	103.92	6.36648e-10	0	5.44802	0	2	759.895	1518.78	-0.194048	89.0851	9883	9883	MS2	19/156	170307_chiba_PAF15_02.raw
	High	FSASGELGTGNVK	Unambiguous	4	2	NP_001081011.1;NP_001082364.1		CID	1	0	1	1	103.29	8.20423e-10	0	17.8994	1	2	633.82	1266.63	0.171106	126.485	14904	14904	MS2	10/114	170307_chiba_PAF15_02.raw
	High	FSASGELGTGNVK	Unambiguous	4	2	NP_001081011.1;NP_001082364.1		CID	1	0	1	1	103.03	6.49547e-10	0	7.04257	1	2	633.82	1266.63	-0.503512	125.692	14798	14798	MS2	10/114	170307_chiba_PAF15_02.raw
	High	FSASGELGTGNVK	Unambiguous	4	2	NP_001081011.1;NP_001082364.1		CID	1	0	1	1	102.28	7.71988e-10	0	20.3733	1	2	633.819	1266.63	-0.889008	129.651	15326	15326	MS2	11/114	170307_chiba_PAF15_02.raw
	High	FSASGELGTGNVK	Unambiguous	4	2	NP_001081011.1;NP_001082364.1		CID	1	0	1	1	102.17	8.91902e-10	0	2.59182	7	2	633.82	1266.63	0.0747321	145.381	17398	17398	MS2	11/114	170307_chiba_PAF15_02.raw
	High	ATPLSPTVILSMSADIPLVVEYK	Unambiguous	3	2	NP_001081011.1;NP_001082364.1		CID	1	0	1	1	102.16	4.5002e-10	0	25.8887	2	2	1222.67	2444.34	-0.220356	108.671	12535	12535	MS2	13/214	170307_chiba_PAF15_02.raw
	High	FSASGELGTGNVK	Unambiguous	4	2	NP_001081011.1;NP_001082364.1		CID	1	0	1	1	102.09	9.17754e-10	0	10.6894	1	2	633.82	1266.63	-0.407138	132.778	15740	15740	MS2	11/114	170307_chiba_PAF15_02.raw
	High	FSASGELGTGNVK	Unambiguous	4	2	NP_001081011.1;NP_001082364.1		CID	1	0	1	1	102.06	1.08903e-09	0	7.74262	1	2	633.82	1266.63	0.171106	140.756	16792	16792	MS2	11/114	170307_chiba_PAF15_02.raw
	High	ATPLSPTVILSMSADIPLVVEYK	Unambiguous	3	2	NP_001081011.1;NP_001082364.1		CID	1	0	1	1	102.01	4.8472e-10	0	6.88185	0	2	1222.67	2444.34	0.878325	141.217	16852	16852	MS2	13/214	170307_chiba_PAF15_02.raw
	High	ATPLSPTVILSMSADIPLVVEYK	Unambiguous	3	2	NP_001081011.1;NP_001082364.1		CID	1	0	1	1	101.99	4.74309e-10	0	5.17591	0	2	1222.67	2444.34	-0.0205953	129.599	15319	15319	MS2	14/214	170307_chiba_PAF15_02.raw
	High	ATPLSPTVILSMSADIPLVVEYK	Unambiguous	3	2	NP_001081011.1;NP_001082364.1		CID	1	0	1	1	101.91	4.9601e-10	0	8.29966	1	2	1222.67	2444.34	0.878325	145.18	17372	17372	MS2	14/214	170307_chiba_PAF15_02.raw
	High	FSASGELGTGNVK	Unambiguous	4	2	NP_001081011.1;NP_001082364.1		CID	1	0	1	1	101.9	9.78166e-10	0	12.0217	1	2	633.82	1266.63	-0.21439	142.873	17070	17070	MS2	11/114	170307_chiba_PAF15_02.raw
	High	FSASGELGTGNVK	Unambiguous	4	2	NP_001081011.1;NP_001082364.1		CID	1	0	1	1	101.9	9.49112e-10	0	5.93309	0	2	633.82	1266.63	-0.0216418	59.0161	5598	5598	MS2	11/114	170307_chiba_PAF15_02.raw
	High	FSASGELGTGNVK	Unambiguous	4	2	NP_001081011.1;NP_001082364.1		CID	1	0	1	1	101.81	8.66814e-10	0	14.8806	0	2	633.819	1266.63	-1.37088	72.8812	7595	7595	MS2	11/114	170307_chiba_PAF15_02.raw
	High	FSASGELGTGNVK	Unambiguous	4	2	NP_001081011.1;NP_001082364.1		CID	1	0	1	1	101.8	8.62205e-10	0	8.18015	1	2	633.82	1266.63	-0.599886	134.356	15950	15950	MS2	11/114	170307_chiba_PAF15_02.raw
	High	AEDNADTVTMVFESPNQEK	Unambiguous	4	2	NP_001081011.1;NP_001082364.1		CID	1	0	1	1	101.8	3.13829e-10	0	41.9728	2	2	1062.97	2124.94	-0.161416	83.2813	9073	9073	MS2	13/206	170307_chiba_PAF15_02.raw
	High	DLSQIGDAVVISCAK	Unambiguous	4	2	NP_001081011.1;NP_001082364.1		CID	1	0	1	1	101.46	1.15391e-09	0	27.6086	13	2	759.896	1518.78	0.931184	147.93	17710	17710	MS2	11/156	170307_chiba_PAF15_02.raw
	High	ATPLSPTVILSMSADIPLVVEYK	Unambiguous	3	2	NP_001081011.1;NP_001082364.1		CID	1	0	1	1	101.27	6.08356e-10	0	6.99338	0	2	1222.67	2444.34	0.179165	127.228	15004	15004	MS2	11/214	170307_chiba_PAF15_02.raw
	High	ATPLSPTVILSMSADIPLVVEYK	Unambiguous	3	2	NP_001081011.1;NP_001082364.1		CID	1	0	1	1	101.08	6.08267e-10	0	7.67805	0	2	1222.67	2444.34	0.279045	139.629	16643	16643	MS2	11/214	170307_chiba_PAF15_02.raw
	High	CAAGEDIITLR	Unambiguous	1	1	NP_001082364.1		CID	1	0	1	1	101.06	1.86848e-09	0	19.3688	0	2	581.3	1161.59	-0.308364	59.9073	5728	5728	MS2	18/88	170307_chiba_PAF15_02.raw
	High	ATPLSPTVILSMSADIPLVVEYK	Unambiguous	3	2	NP_001081011.1;NP_001082364.1		CID	1	0	1	1	101.05	5.88927e-10	0	9.35063	0	2	1222.67	2444.34	-0.120475	122.488	14374	14374	MS2	11/214	170307_chiba_PAF15_02.raw
	High	DLSQIGDAVVISCAK	Unambiguous	4	2	NP_001081011.1;NP_001082364.1		CID	1	0	1	1	100.62	1.36113e-09	0	38.8955	0	2	759.895	1518.78	-0.274422	104.414	11965	11965	MS2	11/156	170307_chiba_PAF15_02.raw
	High	FSASGELGTGNVK	Unambiguous	4	2	NP_001081011.1;NP_001082364.1		CID	1	0	1	1	100.14	1.43789e-09	0	13.0579	0	2	633.82	1266.63	-0.407138	93.2155	10452	10452	MS2	11/114	170307_chiba_PAF15_02.raw
	High	AEDNADTVTMVFESPNQEK	Unambiguous	4	2	NP_001081011.1;NP_001082364.1		CID	1	0	1	1	100.05	4.20135e-10	0	13.3013	1	2	1062.97	2124.94	-0.735881	84.89	9305	9305	MS2	22/206	170307_chiba_PAF15_02.raw
	High	AEDNADTVTMVFESPNQEK	Unambiguous	4	2	NP_001081011.1;NP_001082364.1		CID	1	0	1	1	99.9	5.26996e-10	0	30.2704	100	2	1062.97	2124.94	1.10241	151.758	18130	18130	MS2	15/206	170307_chiba_PAF15_02.raw
	High	FSASGELGTGNVK	Unambiguous	4	2	NP_001081011.1;NP_001082364.1		CID	1	0	1	1	99.86	1.80733e-09	0	11.2018	1	2	633.82	1266.63	0.26748	141.551	16896	16896	MS2	11/114	170307_chiba_PAF15_02.raw
	High	FSASGELGTGNVK	Unambiguous	4	2	NP_001081011.1;NP_001082364.1		CID	1	0	1	1	99.77	2.11932e-09	0	14.699	11	2	633.82	1266.63	0.845723	147.43	17649	17649	MS2	11/114	170307_chiba_PAF15_02.raw
	High	ATPLSPTVILSMSADIPLVVEYK	Unambiguous	3	2	NP_001081011.1;NP_001082364.1		CID	1	0	1	1	99.67	7.98421e-10	0	12.363	0	2	1222.67	2444.33	-0.420116	120.115	14059	14059	MS2	15/214	170307_chiba_PAF15_02.raw
	High	CAAGEDIITLR	Unambiguous	1	1	NP_001082364.1		CID	1	0	1	1	99.66	1.71948e-09	0	8.46885	0	2	581.3	1161.59	0.111991	59.0103	5597	5597	MS2	9/88	170307_chiba_PAF15_02.raw
	High	FSASGELGTGNVK	Unambiguous	4	2	NP_001081011.1;NP_001082364.1		CID	1	0	1	1	99.65	1.89687e-09	0	41.8838	3	2	633.82	1266.63	0.26748	143.913	17209	17209	MS2	11/114	170307_chiba_PAF15_02.raw
	High	FSASGELGTGNVK	Unambiguous	4	2	NP_001081011.1;NP_001082364.1		CID	1	0	1	1	99.64	1.64593e-09	0	17.6574	1	2	633.82	1266.63	-0.118016	128.824	15217	15217	MS2	11/114	170307_chiba_PAF15_02.raw
	High	ATPLSPTVILSMSADIPLVVEYK	Unambiguous	3	2	NP_001081011.1;NP_001082364.1		CID	1	0	1	1	99.6	8.55253e-10	0	9.01992	8	2	1222.67	2444.34	0.478805	151.821	18138	18138	MS2	15/214	170307_chiba_PAF15_02.raw
	High	FSASGELGTGNVK	Unambiguous	4	2	NP_001081011.1;NP_001082364.1		CID	1	0	1	1	99.53	2.09487e-09	0	7.19613	1	2	633.821	1266.63	1.03847	139.162	16582	16582	MS2	11/114	170307_chiba_PAF15_02.raw
	High	FSASGELGTGNVK	Unambiguous	4	2	NP_001081011.1;NP_001082364.1		CID	1	0	1	1	99.48	1.47099e-09	0	1.50315	1	2	633.82	1266.63	-0.503512	135.969	16161	16161	MS2	11/114	170307_chiba_PAF15_02.raw
	High	FSASGELGTGNVK	Unambiguous	4	2	NP_001081011.1;NP_001082364.1		CID	1	0	1	1	99.48	1.7697e-09	0	3.81041	0	2	633.82	1266.63	-0.310764	58.1564	5472	5472	MS2	11/114	170307_chiba_PAF15_02.raw
	High	FSASGELGTGNVK	Unambiguous	4	2	NP_001081011.1;NP_001082364.1		CID	1	0	1	1	99.41	1.6839e-09	0	8.20874	1	2	633.82	1266.63	-0.0216418	139.975	16689	16689	MS2	11/114	170307_chiba_PAF15_02.raw
	High	FSASGELGTGNVK	Unambiguous	4	2	NP_001081011.1;NP_001082364.1		CID	1	0	1	1	99.4	1.49834e-09	0	16.5713	0	2	633.819	1266.63	-0.792634	53.1717	4720	4720	MS2	11/114	170307_chiba_PAF15_02.raw
	High	FSASGELGTGNVK	Unambiguous	4	2	NP_001081011.1;NP_001082364.1		CID	1	0	1	1	99.39	1.51906e-09	0	12.7346	0	2	633.819	1266.63	-1.66	66.1639	6648	6648	MS2	11/114	170307_chiba_PAF15_02.raw
	High	FSASGELGTGNVK	Unambiguous	4	2	NP_001081011.1;NP_001082364.1		CID	1	0	1	1	99.37	1.75151e-09	0	11.1412	1	2	633.82	1266.63	-0.118016	124.106	14588	14588	MS2	11/114	170307_chiba_PAF15_02.raw
	High	FSASGELGTGNVK	Unambiguous	4	2	NP_001081011.1;NP_001082364.1		CID	1	0	1	1	99.37	2.43362e-09	0	8.62697	8	2	633.82	1266.63	0.749349	149.072	17835	17835	MS2	11/114	170307_chiba_PAF15_02.raw
	High	FSASGELGTGNVK	Unambiguous	4	2	NP_001081011.1;NP_001082364.1		CID	1	0	1	1	99.35	1.51569e-09	0	8.35926	0	2	633.82	1266.63	-0.503512	68.7804	7027	7027	MS2	11/114	170307_chiba_PAF15_02.raw
	High	FSASGELGTGNVK	Unambiguous	4	2	NP_001081011.1;NP_001082364.1		CID	1	0	1	1	99.34	1.51918e-09	0	2.77559	0	2	633.82	1266.63	-0.599886	48.2475	3958	3958	MS2	11/114	170307_chiba_PAF15_02.raw
	High	FSASGELGTGNVK	Unambiguous	4	2	NP_001081011.1;NP_001082364.1		CID	1	0	1	1	99.33	1.52269e-09	0	5.83762	0	2	633.819	1266.63	-1.08176	47.4096	3832	3832	MS2	11/114	170307_chiba_PAF15_02.raw
	High	ATPLSPTVILSMSADIPLVVEYK	Unambiguous	3	2	NP_001081011.1;NP_001082364.1		CID	1	0	1	1	99.31	8.79147e-10	0	10.1861	0	2	1222.67	2444.34	0.0792848	123.283	14479	14479	MS2	13/214	170307_chiba_PAF15_02.raw
	High	FSASGELGTGNVK	Unambiguous	4	2	NP_001081011.1;NP_001082364.1		CID	1	0	1	1	99.24	1.55457e-09	0	14.2904	0	2	633.82	1266.63	-0.503512	84.978	9317	9317	MS2	11/114	170307_chiba_PAF15_02.raw
	High	ATPLSPTVILSMSADIPLVVEYK	Unambiguous	3	2	NP_001081011.1;NP_001082364.1		CID	1	0	1	1	99.13	9.1635e-10	0	7.05218	0	2	1222.67	2444.34	0.0792848	136.749	16264	16264	MS2	13/214	170307_chiba_PAF15_02.raw
	High	FSASGELGTGNVK	Unambiguous	4	2	NP_001081011.1;NP_001082364.1		CID	1	0	1	1	99.05	1.88544e-09	0	7.20811	33	2	633.82	1266.63	-0.118016	154.055	18382	18382	MS2	11/114	170307_chiba_PAF15_02.raw
	High	ATPLSPTVILSMSADIPLVVEYK	Unambiguous	3	2	NP_001081011.1;NP_001082364.1		CID	1	0	1	1	99.01	9.42022e-10	0	5.2274	0	2	1222.67	2444.34	-0.0205953	135.955	16159	16159	MS2	14/214	170307_chiba_PAF15_02.raw
	High	ATPLSPTVILSMSADIPLVVEYK	Unambiguous	3	2	NP_001081011.1;NP_001082364.1		CID	1	0	1	1	98.95	9.67862e-10	0	5.91571	13	2	1222.67	2444.34	1.17797	153.369	18309	18309	MS2	14/214	170307_chiba_PAF15_02.raw
	High	ATPLSPTVILSMSADIPLVVEYK	Unambiguous	3	2	NP_001081011.1;NP_001082364.1		CID	1	0	1	1	98.92	9.93806e-10	0	10.2151	0	2	1222.67	2444.33	-0.619877	120.912	14164	14164	MS2	14/214	170307_chiba_PAF15_02.raw
	High	FSASGELGTGNVK	Unambiguous	4	2	NP_001081011.1;NP_001082364.1		CID	1	0	1	1	98.87	2.32844e-09	0	5.6572	6	2	633.82	1266.63	0.556601	144.451	17280	17280	MS2	10/114	170307_chiba_PAF15_02.raw
	High	AEDNADTVTMVFESPNQEK	Unambiguous	4	2	NP_001081011.1;NP_001082364.1		CID	1	0	1	1	98.69	5.34069e-10	0	1.02754	0	2	1062.97	2124.94	-0.850774	63.6821	6292	6292	MS2	25/206	170307_chiba_PAF15_02.raw
	High	FSASGELGTGNVK	Unambiguous	4	2	NP_001081011.1;NP_001082364.1		CID	1	0	1	1	98.53	2.08318e-09	0	20.0013	1	2	633.82	1266.63	-0.407138	110.354	12760	12760	MS2	17/114	170307_chiba_PAF15_02.raw
	High	DLSQIGDAVVISCAK	Unambiguous	4	2	NP_001081011.1;NP_001082364.1		CID	1	0	1	1	98.4	2.64515e-09	0	32.0845	12	2	759.896	1518.78	0.609689	149.728	17900	17900	MS2	11/156	170307_chiba_PAF15_02.raw
	High	DLSQIGDAVVISCAK	Unambiguous	4	2	NP_001081011.1;NP_001082364.1		CID	1	0	1	1	98.32	2.69433e-09	0	23.3575	12	2	759.896	1518.78	0.529315	150.538	17988	17988	MS2	11/156	170307_chiba_PAF15_02.raw
	High	AEDNADTVTMVFESPNQEK	Unambiguous	4	2	NP_001081011.1;NP_001082364.1		CID	1	0	1	1	98.04	6.20293e-10	0	0	0	2	1062.97	2124.94	-0.850774	74.6183	7839	7839	MS2	22/206	170307_chiba_PAF15_02.raw
	High	FSASGELGTGNVK	Unambiguous	4	2	NP_001081011.1;NP_001082364.1		CID	1	0	1	1	97.82	2.50272e-09	0	15.5588	1	2	633.82	1266.63	-0.21439	137.584	16374	16374	MS2	11/114	170307_chiba_PAF15_02.raw
	High	AEDNADTVTmVFESPNQEK	Unambiguous	4	2	NP_001081011.1;NP_001082364.1	M10(Oxidation)	CID	1	0	1	1	97.8	5.2277e-10	0	12.1467	1	2	1070.97	2140.93	-0.635944	56.2846	5194	5194	MS2	19/206	170307_chiba_PAF15_02.raw
	High	DLSQIGDAVVISCAK	Unambiguous	4	2	NP_001081011.1;NP_001082364.1		CID	1	0	1	1	97.77	2.43979e-09	0	24.0185	2	2	759.896	1518.79	1.1723	143.212	17115	17115	MS2	11/156	170307_chiba_PAF15_02.raw
	High	FSASGELGTGNVK	Unambiguous	4	2	NP_001081011.1;NP_001082364.1		CID	1	0	1	1	97.55	2.29409e-09	0	29.2172	0	2	633.819	1266.63	-0.985382	78.2941	8370	8370	MS2	11/114	170307_chiba_PAF15_02.raw
	High	FSASGELGTGNVK	Unambiguous	4	2	NP_001081011.1;NP_001082364.1		CID	1	0	1	1	97.38	2.33997e-09	0	12.5013	0	2	633.819	1266.63	-2.0455	53.9623	4843	4843	MS2	11/114	170307_chiba_PAF15_02.raw
	High	FSASGELGTGNVK	Unambiguous	4	2	NP_001081011.1;NP_001082364.1		CID	1	0	1	1	97.36	2.39668e-09	0	10.4405	1	2	633.82	1266.63	-0.503512	123.312	14483	14483	MS2	11/114	170307_chiba_PAF15_02.raw
	High	FSASGELGTGNVK	Unambiguous	4	2	NP_001081011.1;NP_001082364.1		CID	1	0	1	1	97.23	2.78175e-09	0	25.0486	1	2	633.82	1266.63	0.0747321	90.1356	10030	10030	MS2	11/114	170307_chiba_PAF15_02.raw
	High	FSASGELGTGNVK	Unambiguous	4	2	NP_001081011.1;NP_001082364.1		CID	1	0	1	1	97.22	2.4752e-09	0	17.6123	1	2	633.819	1266.63	-0.889008	124.906	14694	14694	MS2	11/114	170307_chiba_PAF15_02.raw
	High	FSASGELGTGNVK	Unambiguous	4	2	NP_001081011.1;NP_001082364.1		CID	1	0	1	1	97.2	2.48663e-09	0	2.71638	0	2	633.819	1266.63	-1.08176	52.0452	4548	4548	MS2	11/114	170307_chiba_PAF15_02.raw
	High	FSASGELGTGNVK	Unambiguous	4	2	NP_001081011.1;NP_001082364.1		CID	1	0	1	1	97.16	2.52887e-09	0	14.3372	1	2	633.819	1266.63	-1.46725	120.152	14064	14064	MS2	11/114	170307_chiba_PAF15_02.raw
	High	FSASGELGTGNVK	Unambiguous	4	2	NP_001081011.1;NP_001082364.1		CID	1	0	1	1	97.13	3.24351e-09	0	15.9086	0	2	633.818	1266.63	-3.00924	54.7914	4969	4969	MS2	11/114	170307_chiba_PAF15_02.raw
	High	FSASGELGTGNVK	Unambiguous	4	2	NP_001081011.1;NP_001082364.1		CID	1	0	1	1	97.12	2.94044e-09	0	14.9309	1	2	633.82	1266.63	-0.21439	115.171	13400	13400	MS2	11/114	170307_chiba_PAF15_02.raw
	High	FSASGELGTGNVK	Unambiguous	4	2	NP_001081011.1;NP_001082364.1		CID	1	0	1	1	97.09	2.56996e-09	0	19.7605	1	2	633.819	1266.63	-1.17813	95.4418	10750	10750	MS2	11/114	170307_chiba_PAF15_02.raw
	High	FSASGELGTGNVK	Unambiguous	4	2	NP_001081011.1;NP_001082364.1		CID	1	0	1	1	97.05	2.57401e-09	0	5.09375	1	2	633.819	1266.63	-0.889008	121.73	14273	14273	MS2	11/114	170307_chiba_PAF15_02.raw
	High	FSASGELGTGNVK	Unambiguous	4	2	NP_001081011.1;NP_001082364.1		CID	1	0	1	1	96.95	3.16884e-09	0	10.1149	1	2	633.82	1266.63	-0.310764	127.242	15006	15006	MS2	11/114	170307_chiba_PAF15_02.raw
	High	FSASGELGTGNVK	Unambiguous	4	2	NP_001081011.1;NP_001082364.1		CID	1	0	1	1	96.94	3.17614e-09	0	11.2702	1	2	633.82	1266.63	-0.310764	108.165	12468	12468	MS2	11/114	170307_chiba_PAF15_02.raw
	High	FSASGELGTGNVK	Unambiguous	4	2	NP_001081011.1;NP_001082364.1		CID	1	0	1	1	96.82	3.05715e-09	0	27.7913	0	2	633.82	1266.63	-0.0216418	83.4202	9092	9092	MS2	18/114	170307_chiba_PAF15_02.raw
	High	FSASGELGTGNVK	Unambiguous	4	2	NP_001081011.1;NP_001082364.1		CID	1	0	1	1	96.73	4.26772e-09	0	5.01549	15	2	633.82	1266.63	0.845723	152.94	18261	18261	MS2	11/114	170307_chiba_PAF15_02.raw
	High	ATPLSPTVILSMSADIPLVVEYK	Unambiguous	3	2	NP_001081011.1;NP_001082364.1		CID	1	0	1	1	96.23	1.94159e-09	0	7.66392	0	2	1222.67	2444.34	0.179165	137.547	16369	16369	MS2	13/214	170307_chiba_PAF15_02.raw
	High	ATPLSPTVILSMSADIPLVVEYK	Unambiguous	3	2	NP_001081011.1;NP_001082364.1		CID	1	0	1	1	96.01	1.95477e-09	0	4.61845	0	2	1222.67	2444.34	0.279045	128.801	15214	15214	MS2	11/214	170307_chiba_PAF15_02.raw
	High	AEDNADTVTMVFESPNQEK	Unambiguous	4	2	NP_001081011.1;NP_001082364.1		CID	1	0	1	1	95.82	9.42546e-10	0	39.6101	27	2	1062.97	2124.94	-1.65503	153.736	18347	18347	MS2	13/206	170307_chiba_PAF15_02.raw
	High	FSASGELGTGNVK	Unambiguous	4	2	NP_001081011.1;NP_001082364.1		CID	1	0	1	1	95.71	3.50437e-09	0	17.9622	9	2	633.819	1266.63	-0.69626	144.625	17303	17303	MS2	11/114	170307_chiba_PAF15_02.raw
	High	FSASGELGTGNVK	Unambiguous	4	2	NP_001081011.1;NP_001082364.1		CID	1	0	1	1	95.57	4.11838e-09	0	21.3418	1	2	633.82	1266.63	-0.407138	88.3951	9787	9787	MS2	11/114	170307_chiba_PAF15_02.raw
	High	AEDNADTVTMVFESPNQEK	Unambiguous	4	2	NP_001081011.1;NP_001082364.1		CID	1	0	1	1	95.53	1.24555e-09	0	38.8179	59	2	1062.97	2124.94	0.987513	148.607	17788	17788	MS2	13/206	170307_chiba_PAF15_02.raw
	High	FSASGELGTGNVK	Unambiguous	4	2	NP_001081011.1;NP_001082364.1		CID	1	0	1	1	95.41	3.755e-09	0	15.0353	1	2	633.82	1266.63	-0.503512	110.576	12790	12790	MS2	11/114	170307_chiba_PAF15_02.raw
	High	DLSQIGDAVVISCAK	Unambiguous	4	2	NP_001081011.1;NP_001082364.1		CID	1	0	1	1	95.2	5.17922e-09	0	24.6013	9	2	759.896	1518.78	0.368568	148.917	17817	17817	MS2	11/156	170307_chiba_PAF15_02.raw
	High	FSASGELGTGNVK	Unambiguous	4	2	NP_001081011.1;NP_001082364.1		CID	1	0	1	1	95.19	5.84194e-09	0	7.49894	6	2	633.821	1266.63	1.80946	146.24	17502	17502	MS2	11/114	170307_chiba_PAF15_02.raw
	High	FSASGELGTGNVK	Unambiguous	4	2	NP_001081011.1;NP_001082364.1		CID	1	0	1	1	95.1	4.03284e-09	0	8.53755	0	2	633.819	1266.63	-0.889008	64.4106	6399	6399	MS2	10/114	170307_chiba_PAF15_02.raw
	High	DLSQIGDAVVISCAK	Unambiguous	4	2	NP_001081011.1;NP_001082364.1		CID	1	0	1	1	95.06	4.27288e-09	0	5.478	13	2	759.895	1518.78	-0.595917	153.703	18343	18343	MS2	10/156	170307_chiba_PAF15_02.raw
	High	FSASGELGTGNVK	Unambiguous	4	2	NP_001081011.1;NP_001082364.1		CID	1	0	1	1	95.04	4.08894e-09	0	27.3677	0	2	633.819	1266.63	-0.792634	72.1225	7491	7491	MS2	11/114	170307_chiba_PAF15_02.raw
	High	FSASGELGTGNVK	Unambiguous	4	2	NP_001081011.1;NP_001082364.1		CID	1	0	1	1	95.02	4.10781e-09	0	23.4565	1	2	633.819	1266.63	-0.889008	104.495	11976	11976	MS2	11/114	170307_chiba_PAF15_02.raw
	High	FSASGELGTGNVK	Unambiguous	4	2	NP_001081011.1;NP_001082364.1		CID	1	0	1	1	95.02	5.94924e-09	0	6.14942	1	2	633.82	1266.63	0.363854	116.834	13623	13623	MS2	11/114	170307_chiba_PAF15_02.raw
	High	FSASGELGTGNVK	Unambiguous	4	2	NP_001081011.1;NP_001082364.1		CID	1	0	1	1	94.93	4.8687e-09	0	9.11303	0	2	633.82	1266.63	-0.21439	69.6829	7153	7153	MS2	11/114	170307_chiba_PAF15_02.raw
	High	ATPLSPTVILSMSADIPLVVEYK	Unambiguous	3	2	NP_001081011.1;NP_001082364.1		CID	1	0	1	1	94.81	2.54385e-09	0	4.38557	3	2	1222.67	2444.34	0.878325	149.463	17876	17876	MS2	14/214	170307_chiba_PAF15_02.raw
	High	FSASGELGTGNVK	Unambiguous	4	2	NP_001081011.1;NP_001082364.1		CID	1	0	1	1	94.8	4.32126e-09	0	4.24609	0	2	633.82	1266.63	-0.503512	50.6795	4336	4336	MS2	11/114	170307_chiba_PAF15_02.raw
	High	FSASGELGTGNVK	Unambiguous	4	2	NP_001081011.1;NP_001082364.1		CID	1	0	1	1	94.78	4.34121e-09	0	22.0759	0	2	633.819	1266.63	-0.889008	63.5573	6273	6273	MS2	11/114	170307_chiba_PAF15_02.raw
	High	FSASGELGTGNVK	Unambiguous	4	2	NP_001081011.1;NP_001082364.1		CID	1	0	1	1	94.73	4.39148e-09	0	6.57463	0	2	633.819	1266.63	-1.08176	51.5039	4464	4464	MS2	11/114	170307_chiba_PAF15_02.raw
	High	AEDNADTVTMVFESPNQEK	Unambiguous	4	2	NP_001081011.1;NP_001082364.1		CID	1	0	1	1	94.73	1.49748e-09	0	35.8607	100	2	1062.97	2124.94	0.987513	151.28	18074	18074	MS2	25/206	170307_chiba_PAF15_02.raw
	High	DLSQIGDAVVISCAK	Unambiguous	4	2	NP_001081011.1;NP_001082364.1		CID	1	0	1	1	94.69	5.24721e-09	0	33.5649	13	2	759.895	1518.78	-0.0333005	151.401	18088	18088	MS2	11/156	170307_chiba_PAF15_02.raw
	High	FSASGELGTGNVK	Unambiguous	4	2	NP_001081011.1;NP_001082364.1		CID	1	0	1	1	94.62	5.41876e-09	0	21.8188	0	2	633.82	1266.63	-0.310764	100.505	11436	11436	MS2	10/114	170307_chiba_PAF15_02.raw
	High	ATPLSPTVILSMSADIPLVVEYK	Unambiguous	3	2	NP_001081011.1;NP_001082364.1		CID	1	0	1	1	94.61	2.59455e-09	0	6.60475	0	2	1222.67	2444.34	-0.120475	135.154	16054	16054	MS2	14/214	170307_chiba_PAF15_02.raw
	High	FSASGELGTGNVK	Unambiguous	4	2	NP_001081011.1;NP_001082364.1		CID	1	0	1	1	94.35	4.79303e-09	0	10.9972	2	2	633.819	1266.63	-0.889008	109.75	12679	12679	MS2	18/114	170307_chiba_PAF15_02.raw
	High	FSASGELGTGNVK	Unambiguous	4	2	NP_001081011.1;NP_001082364.1		CID	1	0	1	1	94.25	5.52481e-09	0	23.9221	1	2	633.82	1266.63	-0.0216418	111.331	12890	12890	MS2	10/114	170307_chiba_PAF15_02.raw
	High	FSASGELGTGNVK	Unambiguous	4	2	NP_001081011.1;NP_001082364.1		CID	1	0	1	1	93.99	5.86567e-09	0	29.9343	1	2	633.82	1266.63	-0.0216418	108.966	12574	12574	MS2	10/114	170307_chiba_PAF15_02.raw
	High	FSASGELGTGNVK	Unambiguous	4	2	NP_001081011.1;NP_001082364.1		CID	1	0	1	1	93.95	6.10116e-09	0	29.5426	0	2	633.82	1266.63	-0.118016	70.5974	7280	7280	MS2	10/114	170307_chiba_PAF15_02.raw
	High	AEDNADTVTMVFESPNQEK	Unambiguous	4	2	NP_001081011.1;NP_001082364.1		CID	1	0	1	1	93.76	1.64083e-09	0	14.6826	1	2	1062.97	2124.94	0.298156	81.2193	8785	8785	MS2	24/206	170307_chiba_PAF15_02.raw
	High	ATPLSPTVILSMSADIPLVVEYK	Unambiguous	3	2	NP_001081011.1;NP_001082364.1		CID	1	0	1	1	93.69	3.48464e-09	0	6.44939	0	2	1222.67	2444.34	0.179165	114.776	13347	13347	MS2	13/214	170307_chiba_PAF15_02.raw
	High	ATPLSPTVILSMSADIPLVVEYK	Unambiguous	3	2	NP_001081011.1;NP_001082364.1		CID	1	0	1	1	93.65	3.36585e-09	0	6.17518	0	2	1222.67	2444.34	0.279045	131.188	15529	15529	MS2	13/214	170307_chiba_PAF15_02.raw
	High	AEDNADTVTMVFESPNQEK	Unambiguous	4	2	NP_001081011.1;NP_001082364.1		CID	1	0	1	1	93.59	1.85947e-09	0	3.28251	0	2	1062.97	2124.94	-0.620988	66.4442	6688	6688	MS2	14/206	170307_chiba_PAF15_02.raw
	High	ATPLSPTVILSMSADIPLVVEYK	Unambiguous	3	2	NP_001081011.1;NP_001082364.1		CID	1	0	1	1	93.55	3.44425e-09	0	6.69111	0	2	1222.67	2444.34	0.279045	125.663	14794	14794	MS2	13/214	170307_chiba_PAF15_02.raw
	High	ATPLSPTVILSMSADIPLVVEYK	Unambiguous	3	2	NP_001081011.1;NP_001082364.1		CID	1	0	1	1	93.5	3.30546e-09	0	9.49524	0	2	1222.67	2444.33	-0.519996	121.701	14269	14269	MS2	13/214	170307_chiba_PAF15_02.raw
	High	AEDNADTVTMVFESPNQEK	Unambiguous	4	2	NP_001081011.1;NP_001082364.1		CID	1	0	1	1	93.42	1.77445e-09	0	2.64908	0	2	1062.97	2124.94	0.298156	69.0582	7066	7066	MS2	13/206	170307_chiba_PAF15_02.raw
	High	FSASGELGTGNVK	Unambiguous	4	2	NP_001081011.1;NP_001082364.1		CID	1	0	1	1	93.32	6.91395e-09	0	10.7119	1	2	633.82	1266.63	-0.407138	136.764	16266	16266	MS2	11/114	170307_chiba_PAF15_02.raw
	High	DLSQIGDAVVISCAK	Unambiguous	4	2	NP_001081011.1;NP_001082364.1		CID	1	0	1	1	93.3	7.34344e-09	0	33.2462	56	2	759.895	1518.78	-0.435169	152.835	18252	18252	MS2	13/156	170307_chiba_PAF15_02.raw
	High	FSASGELGTGNVK	Unambiguous	4	2	NP_001081011.1;NP_001082364.1		CID	1	0	1	1	93.29	6.96188e-09	0	19.5609	1	2	633.82	1266.63	-0.407138	103.725	11872	11872	MS2	11/114	170307_chiba_PAF15_02.raw
	High	FSASGELGTGNVK	Unambiguous	4	2	NP_001081011.1;NP_001082364.1		CID	1	0	1	1	93.26	6.16042e-09	0	13.4227	1	2	633.819	1266.63	-0.985382	102.836	11751	11751	MS2	11/114	170307_chiba_PAF15_02.raw
	High	FSASGELGTGNVK	Unambiguous	4	2	NP_001081011.1;NP_001082364.1		CID	1	0	1	1	93.19	6.26052e-09	0	4.24513	0	2	633.819	1266.63	-0.69626	46.6076	3706	3706	MS2	11/114	170307_chiba_PAF15_02.raw
	High	FSASGELGTGNVK	Unambiguous	4	2	NP_001081011.1;NP_001082364.1		CID	1	0	1	1	93.16	6.30392e-09	0	26.9882	0	2	633.819	1266.63	-0.889008	85.7992	9429	9429	MS2	11/114	170307_chiba_PAF15_02.raw
	High	FSASGELGTGNVK	Unambiguous	4	2	NP_001081011.1;NP_001082364.1		CID	1	0	1	1	93.12	9.67744e-09	0	14.9148	10	2	633.82	1266.63	0.652975	151.068	18051	18051	MS2	11/114	170307_chiba_PAF15_02.raw
	High	FSASGELGTGNVK	Unambiguous	4	2	NP_001081011.1;NP_001082364.1		CID	1	0	1	1	93.08	7.30679e-09	0	33.4556	0	2	633.82	1266.63	-0.407138	93.986	10556	10556	MS2	11/114	170307_chiba_PAF15_02.raw
	High	AEDNADTVTMVFESPNQEK	Unambiguous	4	2	NP_001081011.1;NP_001082364.1		CID	1	0	1	1	93	2.35558e-09	0	12.2853	0	2	1062.97	2124.94	-0.506095	65.5613	6562	6562	MS2	15/206	170307_chiba_PAF15_02.raw
	High	DLSQIGDAVVISCAK	Unambiguous	4	2	NP_001081011.1;NP_001082364.1		CID	1	0	1	1	92.99	6.88209e-09	0	10.2031	0	2	759.895	1518.78	-0.917413	73.0568	7620	7620	MS2	11/156	170307_chiba_PAF15_02.raw
	High	ATPLSPTVILSMSADIPLVVEYK	Unambiguous	3	2	NP_001081011.1;NP_001082364.1		CID	1	0	1	1	92.8	4.04102e-09	0	7.46993	0	2	1222.67	2444.34	1.07809	143.564	17162	17162	MS2	14/214	170307_chiba_PAF15_02.raw
	High	AEDNADTVTMVFESPNQEK	Unambiguous	4	2	NP_001081011.1;NP_001082364.1		CID	1	0	1	1	92.71	2.3843e-09	0	47.5218	41	2	1062.97	2124.94	0.987513	145.992	17473	17473	MS2	16/206	170307_chiba_PAF15_02.raw
	High	FSASGELGTGNVK	Unambiguous	4	2	NP_001081011.1;NP_001082364.1		CID	1	0	1	1	92.66	7.07311e-09	0	3.62087	0	2	633.819	1266.63	-0.889008	49.0632	4084	4084	MS2	11/114	170307_chiba_PAF15_02.raw
	High	FSASGELGTGNVK	Unambiguous	4	2	NP_001081011.1;NP_001082364.1		CID	1	0	1	1	92.53	7.28804e-09	0	13.4115	1	2	633.82	1266.63	-0.599886	112.112	12994	12994	MS2	11/114	170307_chiba_PAF15_02.raw
	High	AEDNADTVTMVFESPNQEK	Unambiguous	4	2	NP_001081011.1;NP_001082364.1		CID	1	0	1	1	92.43	2.22877e-09	0	13.2766	0	2	1062.97	2124.94	0.298156	71.3289	7381	7381	MS2	15/206	170307_chiba_PAF15_02.raw
	High	AEDNADTVTMVFESPNQEK	Unambiguous	4	2	NP_001081011.1;NP_001082364.1		CID	1	0	1	1	92.33	2.39764e-09	0	26.0063	35	2	1062.97	2124.94	0.527942	150.172	17951	17951	MS2	23/206	170307_chiba_PAF15_02.raw
	High	AEDNADTVTMVFESPNQEK	Unambiguous	4	2	NP_001081011.1;NP_001082364.1		CID	1	0	1	1	91.77	2.59457e-09	0	37.4302	49	2	1062.97	2124.94	0.298156	151.456	18094	18094	MS2	13/206	170307_chiba_PAF15_02.raw
	High	AEDNADTVTMVFESPNQEK	Unambiguous	4	2	NP_001081011.1;NP_001082364.1		CID	1	0	1	1	91.76	3.13399e-09	0	15.0694	1	2	1062.97	2124.94	-0.506095	81.3148	8798	8798	MS2	25/206	170307_chiba_PAF15_02.raw
	High	VLEALKDLIDEACWDITSSGISLQSMDSSHVSLVQLTLR	Unambiguous	4	2	NP_001081011.1;NP_001082364.1		CID	1	0	1	1	91.58	4.17015e-09	1	20.553	2	3	1425.07	4273.18	2.49972	143.954	17215	17215	MS2	25/438	170307_chiba_PAF15_02.raw
	High	VLEALKDLIDEACWDITSSGISLQSMDSSHVSLVQLTLR	Unambiguous	4	2	NP_001081011.1;NP_001082364.1		CID	1	0	1	1	91.53	3.12867e-09	1	4.21289	58	3	1425.06	4273.18	0.614329	150.029	17934	17934	MS2	25/438	170307_chiba_PAF15_02.raw
	High	AEDNADTVTMVFESPNQEK	Unambiguous	4	2	NP_001081011.1;NP_001082364.1		CID	1	0	1	1	91.49	3.72528e-09	0	32.3706	37	2	1062.97	2124.94	1.67687	148.35	17760	17760	MS2	22/206	170307_chiba_PAF15_02.raw
	High	AEDNADTVTMVFESPNQEK	Unambiguous	4	2	NP_001081011.1;NP_001082364.1		CID	1	0	1	1	91.44	2.83529e-09	0	10.8841	2	2	1062.97	2124.94	-0.850774	85.1577	9342	9342	MS2	13/206	170307_chiba_PAF15_02.raw
	High	FSASGELGTGNVK	Unambiguous	4	2	NP_001081011.1;NP_001082364.1		CID	1	0	1	1	91.33	1.08222e-08	0	15.1379	1	2	633.82	1266.63	-0.0216418	107.391	12365	12365	MS2	10/114	170307_chiba_PAF15_02.raw
	High	FSASGELGTGNVK	Unambiguous	4	2	NP_001081011.1;NP_001082364.1		CID	1	0	1	1	91.31	9.65185e-09	0	7.73347	1	2	633.819	1266.63	-0.69626	122.524	14379	14379	MS2	11/114	170307_chiba_PAF15_02.raw
	High	FSASGELGTGNVK	Unambiguous	4	2	NP_001081011.1;NP_001082364.1		CID	1	0	1	1	91.31	9.65185e-09	0	24.4655	0	2	633.82	1266.63	-0.599886	81.7637	8861	8861	MS2	10/114	170307_chiba_PAF15_02.raw
	High	FSASGELGTGNVK	Unambiguous	4	2	NP_001081011.1;NP_001082364.1		CID	1	0	1	1	91.25	1.13609e-08	0	9.63145	1	2	633.82	1266.63	-0.21439	106.586	12258	12258	MS2	11/114	170307_chiba_PAF15_02.raw
	High	FSASGELGTGNVK	Unambiguous	4	2	NP_001081011.1;NP_001082364.1		CID	1	0	1	1	91.08	1.01768e-08	0	10.6177	1	2	633.819	1266.63	-1.08176	118.599	13858	13858	MS2	10/114	170307_chiba_PAF15_02.raw
	High	AEDNADTVTMVFESPNQEK	Unambiguous	4	2	NP_001081011.1;NP_001082364.1		CID	1	0	1	1	91.07	4.02538e-09	0	26.298	32	2	1062.97	2124.94	1.2173	149.096	17838	17838	MS2	15/206	170307_chiba_PAF15_02.raw
	High	FSASGELGTGNVK	Unambiguous	4	2	NP_001081011.1;NP_001082364.1		CID	1	0	1	1	91.02	1.03184e-08	0	41.5909	0	2	633.819	1266.63	-0.792634	76.5895	8124	8124	MS2	11/114	170307_chiba_PAF15_02.raw
	High	FSASGELGTGNVK	Unambiguous	4	2	NP_001081011.1;NP_001082364.1		CID	1	0	1	1	90.95	1.05664e-08	0	8.714	0	2	633.819	1266.63	-1.37088	65.2836	6523	6523	MS2	10/114	170307_chiba_PAF15_02.raw
	High	FSASGELGTGNVK	Unambiguous	4	2	NP_001081011.1;NP_001082364.1		CID	1	0	1	1	90.95	1.595e-08	0	10.6587	9	2	633.82	1266.63	0.652975	151.394	18087	18087	MS2	10/114	170307_chiba_PAF15_02.raw
	High	FSASGELGTGNVK	Unambiguous	4	2	NP_001081011.1;NP_001082364.1		CID	1	0	1	1	90.9	1.53625e-08	0	0	19	2	633.82	1266.63	0.363854	153.137	18284	18284	MS2	11/114	170307_chiba_PAF15_02.raw
	High	FSASGELGTGNVK	Unambiguous	4	2	NP_001081011.1;NP_001082364.1		CID	1	0	1	1	90.88	1.06564e-08	0	6.18913	0	2	633.819	1266.63	-0.69626	49.8716	4210	4210	MS2	11/114	170307_chiba_PAF15_02.raw
	High	ATPLSPTVILSMSADIPLVVEYK	Unambiguous	3	2	NP_001081011.1;NP_001082364.1		CID	1	0	1	1	90.82	6.29236e-09	0	11.4907	3	2	1222.67	2444.34	1.37772	146.914	17585	17585	MS2	13/214	170307_chiba_PAF15_02.raw
	High	FSASGELGTGNVK	Unambiguous	4	2	NP_001081011.1;NP_001082364.1		CID	1	0	1	1	90.79	1.10046e-08	0	20.9493	0	2	633.819	1266.63	-1.56363	73.8021	7725	7725	MS2	10/114	170307_chiba_PAF15_02.raw
	High	ATPLSPTVILSMSADIPLVVEYK	Unambiguous	3	2	NP_001081011.1;NP_001082364.1		CID	1	0	1	1	90.76	6.212e-09	0	12.8584	0	2	1222.67	2444.34	-0.220356	119.329	13954	13954	MS2	11/214	170307_chiba_PAF15_02.raw
	High	CAAGEDIITLR	Unambiguous	1	1	NP_001082364.1		CID	1	0	1	1	90.67	2.04404e-08	0	5.32221	0	2	581.3	1161.59	-0.833808	57.294	5345	5345	MS2	9/88	170307_chiba_PAF15_02.raw
	High	ATPLSPTVILSMSADIPLVVEYK	Unambiguous	3	2	NP_001081011.1;NP_001082364.1		CID	1	0	1	1	90.63	6.40076e-09	0	23.2178	2	2	1222.67	2444.33	-0.519996	110.876	12830	12830	MS2	14/214	170307_chiba_PAF15_02.raw
	High	AEDNADTVTMVFESPNQEK	Unambiguous	4	2	NP_001081011.1;NP_001082364.1		CID	1	0	1	1	90.52	3.77041e-09	0	2.59602	0	2	1062.97	2124.94	-0.620988	68.1609	6940	6940	MS2	15/206	170307_chiba_PAF15_02.raw
	High	CAAGEDIITLR	Unambiguous	1	1	NP_001082364.1		CID	1	0	1	1	90.43	1.46276e-08	0	13.3249	0	2	581.3	1161.59	0.217079	58.1506	5471	5471	MS2	9/88	170307_chiba_PAF15_02.raw
	High	AEDNADTVTMVFESPNQEK	Unambiguous	4	2	NP_001081011.1;NP_001082364.1		CID	1	0	1	1	90.24	4.49463e-09	0	32.5693	1	2	1062.97	2124.94	-0.161416	84.2867	9219	9219	MS2	12/206	170307_chiba_PAF15_02.raw
	High	FSASGELGTGNVK	Unambiguous	4	2	NP_001081011.1;NP_001082364.1		CID	1	0	1	1	90.11	1.27236e-08	0	14.69	0	2	633.819	1266.63	-1.08176	67.1045	6783	6783	MS2	11/114	170307_chiba_PAF15_02.raw
	High	LSQTSNVDKEEEAVTIEMNEPVQLTFALR	Unambiguous	4	2	NP_001081011.1;NP_001082364.1		CID	1	0	1	1	90.04	6.93582e-09	1	37.1127	1	2	1646.33	3291.65	1.24075	98.0789	11109	11109	MS2	12/322	170307_chiba_PAF15_02.raw
	High	AEDNADTVTMVFESPNQEK	Unambiguous	4	2	NP_001081011.1;NP_001082364.1		CID	1	0	1	1	89.96	4.69303e-09	0	26.9584	59	2	1062.97	2124.94	-0.0465225	150.915	18032	18032	MS2	14/206	170307_chiba_PAF15_02.raw
	High	LSQTSNVDKEEEAVTIEMNEPVQLTFALR	Unambiguous	4	2	NP_001081011.1;NP_001082364.1		CID	1	0	1	1	89.94	7.14808e-09	1	33.795	1	2	1646.33	3291.65	1.46326	103.805	11883	11883	MS2	12/322	170307_chiba_PAF15_02.raw
	High	DLIDEACWDITSSGISLQSMDSSHVSLVQLTLR	Unambiguous	4	2	NP_001081011.1;NP_001082364.1		CID	1	0	1	1	89.85	1.05585e-08	0	3.28654	0	3	1207.26	3619.76	0.555258	138.346	16475	16475	MS2	23/346	170307_chiba_PAF15_02.raw
	High	FSASGELGTGNVK	Unambiguous	4	2	NP_001081011.1;NP_001082364.1		CID	1	0	1	1	89.74	1.56069e-08	0	12.6071	1	2	633.82	1266.63	-0.0216418	142.029	16960	16960	MS2	11/114	170307_chiba_PAF15_02.raw
	High	AEDNADTVTMVFESPNQEK	Unambiguous	4	2	NP_001081011.1;NP_001082364.1		CID	1	0	1	1	89.64	5.70373e-09	0	32.5337	8	2	1062.97	2124.94	1.56198	139.273	16597	16597	MS2	14/206	170307_chiba_PAF15_02.raw
	High	LSQTSNVDKEEEAVTIEMNEPVQLTFALR	Unambiguous	4	2	NP_001081011.1;NP_001082364.1		CID	1	0	1	1	89.57	7.72855e-09	1	33.3893	1	2	1646.33	3291.65	1.16658	98.8149	11208	11208	MS2	12/322	170307_chiba_PAF15_02.raw
	High	LSQTSNVDKEEEAVTIEMNEPVQLTFALR	Unambiguous	4	2	NP_001081011.1;NP_001082364.1		CID	1	0	1	1	89.45	9.13684e-09	1	4.40353	0	3	1097.89	3291.64	-0.0798481	126.922	14963	14963	MS2	10/322	170307_chiba_PAF15_02.raw
	High	FSASGELGTGNVK	Unambiguous	4	2	NP_001081011.1;NP_001082364.1		CID	1	0	1	1	89.08	1.61291e-08	0	7.33305	0	2	633.819	1266.63	-1.08176	57.3055	5347	5347	MS2	11/114	170307_chiba_PAF15_02.raw
	High	FSASGELGTGNVK	Unambiguous	4	2	NP_001081011.1;NP_001082364.1		CID	1	0	1	1	89.08	1.61291e-08	0	18.1988	1	2	633.819	1266.63	-0.889008	112.903	13099	13099	MS2	11/114	170307_chiba_PAF15_02.raw
	High	ATPLSPTVILSMSADIPLVVEYK	Unambiguous	3	2	NP_001081011.1;NP_001082364.1		CID	1	0	1	1	88.96	9.52931e-09	0	7.95454	0	2	1222.67	2444.34	0.0792848	132.77	15739	15739	MS2	14/214	170307_chiba_PAF15_02.raw
	High	DLIDEACWDITSSGISLQSMDSSHVSLVQLTLR	Unambiguous	4	2	NP_001081011.1;NP_001082364.1		CID	1	0	1	1	88.89	1.31059e-08	0	28.8085	0	3	1207.26	3619.77	0.858767	142.329	16999	16999	MS2	28/346	170307_chiba_PAF15_02.raw
	High	DLSQIGDAVVISCAK	Unambiguous	4	2	NP_001081011.1;NP_001082364.1		CID	1	0	1	1	88.86	2.04127e-08	0	28.307	1	2	759.895	1518.78	-0.274422	106.726	12277	12277	MS2	18/156	170307_chiba_PAF15_02.raw
	High	ATPLSPTVILSMSADIPLVVEYK	Unambiguous	3	2	NP_001081011.1;NP_001082364.1		CID	1	0	1	1	88.77	9.95546e-09	0	30.5701	1	2	1222.67	2444.34	-0.120475	110.117	12729	12729	MS2	14/214	170307_chiba_PAF15_02.raw
	High	AEDNADTVTMVFESPNQEK	Unambiguous	4	2	NP_001081011.1;NP_001082364.1		CID	1	0	1	1	88.76	6.25314e-09	0	2.79351	0	2	1062.97	2124.94	-0.506095	67.3131	6814	6814	MS2	25/206	170307_chiba_PAF15_02.raw
	High	FSASGELGTGNVK	Unambiguous	4	2	NP_001081011.1;NP_001082364.1		CID	1	0	1	1	88.55	1.82226e-08	0	15.8486	1	2	633.819	1266.63	-0.985382	120.942	14168	14168	MS2	10/114	170307_chiba_PAF15_02.raw
	High	LSQTSNVDKEEEAVTIEMNEPVQLTFALR	Unambiguous	4	2	NP_001081011.1;NP_001082364.1		CID	1	0	1	1	88.53	1.31864e-08	1	28.0251	1	2	1646.33	3291.65	1.68577	99.632	11319	11319	MS2	11/322	170307_chiba_PAF15_02.raw
	High	DLSQIGDAVVISCAK	Unambiguous	4	2	NP_001081011.1;NP_001082364.1		CID	1	0	1	1	88.47	2.34684e-08	0	39.7639	21	2	759.895	1518.78	0.0470732	152.947	18262	18262	MS2	11/156	170307_chiba_PAF15_02.raw
	High	FSASGELGTGNVK	Unambiguous	4	2	NP_001081011.1;NP_001082364.1		CID	1	0	1	1	88.36	1.90375e-08	0	13.9299	0	2	633.819	1266.63	-0.792634	52.8787	4675	4675	MS2	11/114	170307_chiba_PAF15_02.raw
	High	ATPLSPTVILSMSADIPLVVEYK	Unambiguous	3	2	NP_001081011.1;NP_001082364.1		CID	1	0	1	1	88.34	1.15046e-08	0	17.1529	1	2	1222.67	2444.34	0.578685	144.351	17267	17267	MS2	13/214	170307_chiba_PAF15_02.raw
	High	AEDNADTVTMVFESPNQEK	Unambiguous	4	2	NP_001081011.1;NP_001082364.1		CID	1	0	1	1	88.09	7.37384e-09	0	12.0258	0	2	1062.97	2124.94	-0.276309	72.0957	7487	7487	MS2	13/206	170307_chiba_PAF15_02.raw
	High	FSASGELGTGNVK	Unambiguous	4	2	NP_001081011.1;NP_001082364.1		CID	1	0	1	1	88.03	2.06979e-08	0	50.1571	1	2	633.819	1266.63	-1.37088	82.6954	8991	8991	MS2	9/114	170307_chiba_PAF15_02.raw
	High	FSASGELGTGNVK	Unambiguous	4	2	NP_001081011.1;NP_001082364.1		CID	1	0	1	1	87.99	2.40665e-08	0	5.12448	1	2	633.82	1266.63	-0.21439	131.196	15530	15530	MS2	11/114	170307_chiba_PAF15_02.raw
	High	FSASGELGTGNVK	Unambiguous	4	2	NP_001081011.1;NP_001082364.1		CID	1	0	1	1	87.97	2.08262e-08	0	9.5582	0	2	633.819	1266.63	-0.889008	67.8962	6902	6902	MS2	11/114	170307_chiba_PAF15_02.raw
	High	AEDNADTVTMVFESPNQEK	Unambiguous	4	2	NP_001081011.1;NP_001082364.1		CID	1	0	1	1	87.97	6.46331e-09	0	58.9688	26	2	1062.97	2124.94	0.413049	146.109	17487	17487	MS2	23/206	170307_chiba_PAF15_02.raw
	High	AEDNADTVTMVFESPNQEK	Unambiguous	4	2	NP_001081011.1;NP_001082364.1		CID	1	0	1	1	87.93	7.40897e-09	0	8.43673	45	2	1062.98	2124.94	1.90665	152.666	18233	18233	MS2	25/206	170307_chiba_PAF15_02.raw
	High	DLSQIGDAVVISCAK	Unambiguous	4	2	NP_001081011.1;NP_001082364.1		CID	1	0	1	1	87.92	2.53454e-08	0	16.4817	60	2	759.895	1518.78	-0.274422	153.79	18353	18353	MS2	12/156	170307_chiba_PAF15_02.raw
	High	AEDNADTVTMVFESPNQEK	Unambiguous	4	2	NP_001081011.1;NP_001082364.1		CID	1	0	1	1	87.88	6.35425e-09	0	53.6836	49	2	1062.97	2124.94	0.298156	152.405	18204	18204	MS2	21/206	170307_chiba_PAF15_02.raw
	High	FSASGELGTGNVK	Unambiguous	4	2	NP_001081011.1;NP_001082364.1		CID	1	0	1	1	87.73	2.21782e-08	0	41.7218	0	2	633.819	1266.63	-1.17813	74.9999	7893	7893	MS2	11/114	170307_chiba_PAF15_02.raw
	High	FSASGELGTGNVK	Unambiguous	4	2	NP_001081011.1;NP_001082364.1		CID	1	0	1	1	87.72	2.20603e-08	0	5.91572	1	2	633.82	1266.63	-0.503512	89.435	9933	9933	MS2	10/114	170307_chiba_PAF15_02.raw
	High	VLEALKDLIDEACWDITSSGISLQSMDSSHVSLVQLTLR	Unambiguous	4	2	NP_001081011.1;NP_001082364.1		CID	1	0	1	1	87.69	7.65971e-09	1	29.4562	8	3	1425.06	4273.18	0.957129	145.418	17403	17403	MS2	22/438	170307_chiba_PAF15_02.raw
	High	AEDNADTVTMVFESPNQEK	Unambiguous	4	2	NP_001081011.1;NP_001082364.1		CID	1	0	1	1	87.42	8.5133e-09	0	8.32701	0	2	1062.97	2124.94	-0.506095	78.5934	8415	8415	MS2	23/206	170307_chiba_PAF15_02.raw
	High	LSQTSNVDKEEEAVTIEMNEPVQLTFALR	Unambiguous	4	2	NP_001081011.1;NP_001082364.1		CID	1	0	1	1	87.4	1.66503e-08	1	29.3063	1	2	1646.33	3291.65	1.98245	104.145	11929	11929	MS2	24/322	170307_chiba_PAF15_02.raw
	High	AEDNADTVTMVFESPNQEK	Unambiguous	4	2	NP_001081011.1;NP_001082364.1		CID	1	0	1	1	87.27	7.40623e-09	0	5.03998	1	2	1062.97	2124.94	-0.850774	76.325	8086	8086	MS2	13/206	170307_chiba_PAF15_02.raw
	High	DLIDEACWDITSSGISLQSMDSSHVSLVQLTLR	Unambiguous	4	2	NP_001081011.1;NP_001082364.1		CID	1	0	1	1	87.16	2.10579e-08	0	15.3232	31	3	1207.26	3619.76	0.352918	152.206	18182	18182	MS2	23/346	170307_chiba_PAF15_02.raw
	High	CAAGEDIITLR	Unambiguous	1	1	NP_001082364.1		CID	1	0	1	1	86.91	4.85835e-08	0	36.9869	0	2	581.3	1161.59	-0.833808	60.473	5814	5814	MS2	9/88	170307_chiba_PAF15_02.raw
	High	ATPLSPTVILSMSADIPLVVEYK	Unambiguous	3	2	NP_001081011.1;NP_001082364.1		CID	1	0	1	1	86.86	1.60729e-08	0	20.8168	0	2	1222.67	2444.34	0.378925	142.813	17062	17062	MS2	14/214	170307_chiba_PAF15_02.raw
	High	FSASGELGTGNVK	Unambiguous	4	2	NP_001081011.1;NP_001082364.1		CID	1	0	1	1	86.27	3.70595e-08	0	36.0661	1	2	633.82	1266.63	-0.310764	96.2024	10853	10853	MS2	11/114	170307_chiba_PAF15_02.raw
	High	FSASGELGTGNVK	Unambiguous	4	2	NP_001081011.1;NP_001082364.1		CID	1	0	1	1	86.21	3.12328e-08	0	18.123	1	2	633.82	1266.63	-0.503512	101.325	11547	11547	MS2	11/114	170307_chiba_PAF15_02.raw
	High	LSQTSNVDKEEEAVTIEMNEPVQLTFALR	Unambiguous	4	2	NP_001081011.1;NP_001082364.1		CID	1	0	1	1	86.07	2.33578e-08	1	33.2031	0	2	1646.33	3291.65	1.90828	94.1358	10576	10576	MS2	13/322	170307_chiba_PAF15_02.raw
	High	FSASGELGTGNVK	Unambiguous	4	2	NP_001081011.1;NP_001082364.1		CID	1	0	1	1	86.02	3.26295e-08	0	21.4131	0	2	633.819	1266.63	-0.69626	81.0078	8755	8755	MS2	10/114	170307_chiba_PAF15_02.raw
	High	LSQTSNVDKEEEAVTIEMNEPVQLTFALR	Unambiguous	4	2	NP_001081011.1;NP_001082364.1		CID	1	0	1	1	86.02	2.31282e-08	1	34.2507	0	2	1646.32	3291.63	-2.39358	100.03	11373	11373	MS2	13/322	170307_chiba_PAF15_02.raw
	High	FSASGELGTGNVK	Unambiguous	4	2	NP_001081011.1;NP_001082364.1		CID	1	0	1	1	85.83	3.87906e-08	0	21.9014	1	2	633.82	1266.63	-0.407138	117.822	13754	13754	MS2	17/114	170307_chiba_PAF15_02.raw
	High	LSQTSNVDKEEEAVTIEMNEPVQLTFALR	Unambiguous	4	2	NP_001081011.1;NP_001082364.1		CID	1	0	1	1	85.54	2.68084e-08	1	42.8209	1	2	1646.32	3291.63	-2.54192	102.287	11678	11678	MS2	14/322	170307_chiba_PAF15_02.raw
	High	ATPLSPTVILSMSADIPLVVEYK	Unambiguous	3	2	NP_001081011.1;NP_001082364.1		CID	1	0	1	1	85.43	2.14813e-08	0	7.30193	0	2	1222.67	2444.34	-0.0205953	134.348	15949	15949	MS2	13/214	170307_chiba_PAF15_02.raw
	High	FSASGELGTGNVK	Unambiguous	4	2	NP_001081011.1;NP_001082364.1		CID	1	0	1	1	85.1	4.03284e-08	0	18.7057	0	2	633.82	1266.63	-0.599886	77.436	8248	8248	MS2	11/114	170307_chiba_PAF15_02.raw
	High	DLIDEACWDITSSGISLQSMDSSHVSLVQLTLR	Unambiguous	4	2	NP_001081011.1;NP_001082364.1		CID	1	0	1	1	84.94	3.54293e-08	0	6.75204	0	3	1207.26	3619.76	-0.456441	122.331	14353	14353	MS2	29/346	170307_chiba_PAF15_02.raw
	High	FSASGELGTGNVK	Unambiguous	4	2	NP_001081011.1;NP_001082364.1		CID	1	0	1	1	84.89	4.23263e-08	0	5.6909	0	2	633.819	1266.63	-0.889008	45.7739	3581	3581	MS2	9/114	170307_chiba_PAF15_02.raw
	High	AEDNADTVTMVFESPNQEK	Unambiguous	4	2	NP_001081011.1;NP_001082364.1		CID	1	0	1	1	84.52	1.39507e-08	0	9.79895	0	2	1062.97	2124.94	-0.850774	72.8594	7592	7592	MS2	24/206	170307_chiba_PAF15_02.raw
	High	AEDNADTVTMVFESPNQEK	Unambiguous	4	2	NP_001081011.1;NP_001082364.1		CID	1	0	1	1	84.26	1.66863e-08	0	25.4848	37	2	1062.97	2124.94	0.757728	149.361	17867	17867	MS2	15/206	170307_chiba_PAF15_02.raw
	High	ATPLSPTVILSMSADIPLVVEYK	Unambiguous	3	2	NP_001081011.1;NP_001082364.1		CID	1	0	1	1	84.09	2.92456e-08	0	5.32345	0	2	1222.67	2444.34	0.0792848	133.555	15844	15844	MS2	15/214	170307_chiba_PAF15_02.raw
	High	ATPLSPTVILSMSADIPLVVEYK	Unambiguous	3	2	NP_001081011.1;NP_001082364.1		CID	1	0	1	1	84.03	3.10363e-08	0	1.70439	4	2	1222.67	2444.34	0.778445	151.048	18048	18048	MS2	10/214	170307_chiba_PAF15_02.raw
	High	FSASGELGTGNVK	Unambiguous	4	2	NP_001081011.1;NP_001082364.1		CID	1	0	1	1	83.99	5.20727e-08	0	22.9693	0	2	633.819	1266.63	-0.792634	56.2181	5184	5184	MS2	11/114	170307_chiba_PAF15_02.raw
	High	DLSQIGDAVVISCAK	Unambiguous	4	2	NP_001081011.1;NP_001082364.1		CID	1	0	1	1	83.77	6.82108e-08	0	23.8546	0	2	759.895	1518.78	-0.515543	92.7209	10385	10385	MS2	11/156	170307_chiba_PAF15_02.raw
	High	DLIDEACWDITSSGISLQSMDSSHVSLVQLTLR	Unambiguous	4	2	NP_001081011.1;NP_001082364.1		CID	1	0	1	1	83.71	4.31982e-08	0	10.3031	0	3	1207.26	3619.77	0.858767	139.147	16580	16580	MS2	26/346	170307_chiba_PAF15_02.raw
	High	DLSQIGDAVVISCAK	Unambiguous	4	2	NP_001081011.1;NP_001082364.1		CID	1	0	1	1	83.67	7.86052e-08	0	27.4112	1	2	759.896	1518.78	0.529315	116.496	13579	13579	MS2	12/156	170307_chiba_PAF15_02.raw
	High	LSQTSNVDKEEEAVTIEMNEPVQLTFALR	Unambiguous	4	2	NP_001081011.1;NP_001082364.1		CID	1	0	1	1	83.53	4.03684e-08	1	38.7357	2	2	1646.33	3291.65	2.20496	111.713	12941	12941	MS2	13/322	170307_chiba_PAF15_02.raw
	High	FSASGELGTGNVK	Unambiguous	4	2	NP_001081011.1;NP_001082364.1		CID	1	0	1	1	83.47	5.86963e-08	0	15.7536	1	2	633.82	1266.63	-0.599886	105.215	12074	12074	MS2	10/114	170307_chiba_PAF15_02.raw
	High	DLSQIGDAVVISCAK	Unambiguous	4	2	NP_001081011.1;NP_001082364.1		CID	1	0	1	1	83.28	7.25986e-08	0	34.1866	0	2	759.895	1518.78	-0.0333005	103.449	11834	11834	MS2	11/156	170307_chiba_PAF15_02.raw
	High	AEDNADTVTMVFESPNQEK	Unambiguous	4	2	NP_001081011.1;NP_001082364.1		CID	1	0	1	1	83.28	1.97356e-08	0	21.1256	0	2	1062.97	2124.94	0.183263	70.5706	7276	7276	MS2	14/206	170307_chiba_PAF15_02.raw
	High	FSASGELGTGNVK	Unambiguous	4	2	NP_001081011.1;NP_001082364.1		CID	1	0	1	1	83.26	6.93933e-08	0	49.0288	1	2	633.82	1266.63	0.0747321	94.8077	10666	10666	MS2	11/114	170307_chiba_PAF15_02.raw
	High	LSQTSNVDKEEEAVTIEMNEPVQLTFALR	Unambiguous	4	2	NP_001081011.1;NP_001082364.1		CID	1	0	1	1	83.24	3.31969e-08	1	44.1604	1	2	1646.33	3291.64	0.499053	112.463	13041	13041	MS2	11/322	170307_chiba_PAF15_02.raw
	High	FSASGELGTGNVK	Unambiguous	4	2	NP_001081011.1;NP_001082364.1		CID	1	0	1	1	83.2	6.24612e-08	0	32.2647	1	2	633.819	1266.63	-0.792634	87.7734	9701	9701	MS2	17/114	170307_chiba_PAF15_02.raw
	High	LSQTSNVDKEEEAVTIEMNEPVQLTFALR	Unambiguous	4	2	NP_001081011.1;NP_001082364.1		CID	1	0	1	1	82.74	4.23026e-08	1	2.96457	3	3	1097.89	3291.64	-0.191103	154.356	18417	18417	MS2	14/322	170307_chiba_PAF15_02.raw
	High	FSASGELGTGNVK	Unambiguous	4	2	NP_001081011.1;NP_001082364.1		CID	1	0	1	1	82.5	1.06283e-07	0	3.44903	12	2	633.82	1266.63	0.363854	152.178	18178	18178	MS2	11/114	170307_chiba_PAF15_02.raw
	High	DLSQIGDAVVISCAK	Unambiguous	4	2	NP_001081011.1;NP_001082364.1		CID	1	0	1	1	82.12	8.40854e-08	0	34.4545	1	2	759.895	1518.78	-0.595917	105.005	12045	12045	MS2	13/156	170307_chiba_PAF15_02.raw
	High	DLSQIGDAVVISCAK	Unambiguous	4	2	NP_001081011.1;NP_001082364.1		CID	1	0	1	1	81.89	1.01601e-07	0	46.8068	9	2	759.895	1518.78	-0.274422	154.542	18443	18443	MS2	10/156	170307_chiba_PAF15_02.raw
	High	DLSQIGDAVVISCAK	Unambiguous	4	2	NP_001081011.1;NP_001082364.1		CID	1	0	1	1	81.8	1.09014e-07	0	45.0807	2	2	759.895	1518.78	0.0470732	138.695	16521	16521	MS2	10/156	170307_chiba_PAF15_02.raw
	High	DLSQIGDAVVISCAK	Unambiguous	4	2	NP_001081011.1;NP_001082364.1		CID	1	0	1	1	81.78	1.07858e-07	0	47.7929	2	2	759.895	1518.78	-0.515543	143.906	17208	17208	MS2	11/156	170307_chiba_PAF15_02.raw
	High	DLSQIGDAVVISCAK	Unambiguous	4	2	NP_001081011.1;NP_001082364.1		CID	1	0	1	1	81.59	1.07134e-07	0	31.0787	2	2	759.895	1518.78	-0.0333005	137.732	16394	16394	MS2	11/156	170307_chiba_PAF15_02.raw
	High	FSASGELGTGNVK	Unambiguous	4	2	NP_001081011.1;NP_001082364.1		CID	1	0	1	1	81.48	9.35246e-08	0	25.3502	0	2	633.819	1266.63	-1.17813	79.211	8501	8501	MS2	11/114	170307_chiba_PAF15_02.raw
	High	DLSQIGDAVVISCAK	Unambiguous	4	2	NP_001081011.1;NP_001082364.1		CID	1	0	1	1	81.39	9.94765e-08	0	29.7588	0	2	759.895	1518.78	-0.595917	105.958	12174	12174	MS2	11/156	170307_chiba_PAF15_02.raw
	High	FSASGELGTGNVK	Unambiguous	4	2	NP_001081011.1;NP_001082364.1		CID	1	0	1	1	80.9	1.06074e-07	0	41.0393	1	2	633.819	1266.63	-0.69626	99.8451	11348	11348	MS2	11/114	170307_chiba_PAF15_02.raw
	High	FSASGELGTGNVK	Unambiguous	4	2	NP_001081011.1;NP_001082364.1		CID	1	0	1	1	80.46	1.33575e-07	0	22.2423	0	2	633.82	1266.63	-0.407138	80.1023	8628	8628	MS2	10/114	170307_chiba_PAF15_02.raw
	High	DLIDEACWDITSSGISLQSMDSSHVSLVQLTLR	Unambiguous	4	2	NP_001081011.1;NP_001082364.1		CID	1	0	1	1	80.31	9.59041e-08	0	2.18394	5	3	1207.26	3619.76	0.454088	148.902	17815	17815	MS2	32/346	170307_chiba_PAF15_02.raw
	High	AEDNADTVTMVFESPNQEK	Unambiguous	4	2	NP_001081011.1;NP_001082364.1		CID	1	0	1	1	80.01	4.63931e-08	0	44.6409	1	2	1062.97	2124.94	-0.0465225	82.7734	9002	9002	MS2	20/206	170307_chiba_PAF15_02.raw
	High	FSASGELGTGNVK	Unambiguous	4	2	NP_001081011.1;NP_001082364.1		CID	1	0	1	1	79.68	1.40479e-07	0	38.4983	0	2	633.819	1266.63	-1.08176	62.6929	6144	6144	MS2	9/114	170307_chiba_PAF15_02.raw
	High	DLSQIGDAVVISCAK	Unambiguous	4	2	NP_001081011.1;NP_001082364.1		CID	1	0	1	1	79.67	1.47816e-07	0	23.6248	0	2	759.895	1518.78	-0.756665	91.9534	10280	10280	MS2	17/156	170307_chiba_PAF15_02.raw
	High	DLIDEACWDITSSGISLQSMDSSHVSLVQLTLR	Unambiguous	4	2	NP_001081011.1;NP_001082364.1		CID	1	0	1	1	79.6	1.12389e-07	0	14.9971	23	3	1207.26	3619.76	0.656428	153.772	18351	18351	MS2	28/346	170307_chiba_PAF15_02.raw
	High	FSASGELGTGNVK	Unambiguous	4	2	NP_001081011.1;NP_001082364.1		CID	1	0	1	1	79.57	1.67268e-07	0	14.1563	1	2	633.82	1266.63	-0.21439	117.61	13726	13726	MS2	10/114	170307_chiba_PAF15_02.raw
	High	DLSQIGDAVVISCAK	Unambiguous	4	2	NP_001081011.1;NP_001082364.1		CID	1	0	1	1	79.26	1.6245e-07	0	25.5179	0	2	759.895	1518.78	-0.595917	94.2741	10595	10595	MS2	13/156	170307_chiba_PAF15_02.raw
	High	DLIDEACWDITSSGISLQSMDSSHVSLVQLTLR	Unambiguous	4	2	NP_001081011.1;NP_001082364.1		CID	1	0	1	1	79.01	1.29371e-07	0	5.85382	0	3	1207.26	3619.76	0.454088	123.914	14563	14563	MS2	28/346	170307_chiba_PAF15_02.raw
	High	AEDNADTVTMVFESPNQEK	Unambiguous	4	2	NP_001081011.1;NP_001082364.1		CID	1	0	1	1	78.96	5.01877e-08	0	3.97988	0	2	1062.97	2124.94	-0.850774	73.8078	7726	7726	MS2	11/206	170307_chiba_PAF15_02.raw
	High	DLSQIGDAVVISCAK	Unambiguous	4	2	NP_001081011.1;NP_001082364.1		CID	1	0	1	1	78.89	2.02721e-07	0	21.4764	6	2	759.895	1518.78	-0.274422	144.595	17299	17299	MS2	10/156	170307_chiba_PAF15_02.raw
	High	DLSQIGDAVVISCAK	Unambiguous	4	2	NP_001081011.1;NP_001082364.1		CID	1	0	1	1	78.86	2.04127e-07	0	26.7614	1	2	759.895	1518.78	-0.435169	107.509	12381	12381	MS2	10/156	170307_chiba_PAF15_02.raw
	High	CAAGEDIITLR	Unambiguous	1	1	NP_001082364.1		CID	1	0	1	1	78.82	3.1296e-07	0	43.687	1	2	581.3	1161.59	-1.04399	68.053	6925	6925	MS2	8/88	170307_chiba_PAF15_02.raw
	High	DLIDEACWDITSSGISLQSMDSSHVSLVQLTLR	Unambiguous	4	2	NP_001081011.1;NP_001082364.1		CID	1	0	1	1	78.62	1.47022e-07	0	5.01195	0	3	1207.26	3619.76	-0.051761	125.347	14752	14752	MS2	24/346	170307_chiba_PAF15_02.raw
	High	DLSQIGDAVVISCAK	Unambiguous	4	2	NP_001081011.1;NP_001082364.1		CID	1	0	1	1	78.58	1.89986e-07	0	27.9984	1	2	759.895	1518.78	-0.676291	102.677	11730	11730	MS2	12/156	170307_chiba_PAF15_02.raw
	High	LMDLDVEQLGIPEQEYSCVIK	Unambiguous	4	2	NP_001081011.1;NP_001082364.1		CID	1	0	1	1	78.39	1.81821e-07	0	61.606	1	2	1211.6	2422.19	0.460444	103.485	11839	11839	MS2	10/214	170307_chiba_PAF15_02.raw
	High	LSQTSNVDKEEEAVTIEMNEPVQLTFALR	Unambiguous	4	2	NP_001081011.1;NP_001082364.1		CID	1	0	1	1	78.07	1.14627e-07	1	46.5767	0	2	1646.33	3291.64	0.573223	88.2195	9762	9762	MS2	10/322	170307_chiba_PAF15_02.raw
	High	LMDLDVEQLGIPEQEYSCVIK	Unambiguous	4	2	NP_001081011.1;NP_001082364.1		CID	1	0	1	1	77.97	2.33796e-07	0	50.95	4	2	1211.6	2422.19	-0.345903	133.94	15895	15895	MS2	10/214	170307_chiba_PAF15_02.raw
	High	DLIDEACWDITSSGISLQSMDSSHVSLVQLTLR	Unambiguous	4	2	NP_001081011.1;NP_001082364.1		CID	1	0	1	1	77.87	1.75553e-07	0	4.59245	0	3	1207.26	3619.76	0.0494089	131.041	15509	15509	MS2	17/346	170307_chiba_PAF15_02.raw
	High	LSQTSNVDKEEEAVTIEMNEPVQLTFALR	Unambiguous	4	2	NP_001081011.1;NP_001082364.1		CID	1	0	1	1	77.84	1.30728e-07	1	5.05512	0	3	1097.89	3291.64	-0.191103	90.7271	10111	10111	MS2	10/322	170307_chiba_PAF15_02.raw
	High	FSASGELGTGNVK	Unambiguous	4	2	NP_001081011.1;NP_001082364.1		CID	1	0	1	1	77.8	2.16576e-07	0	12.9269	1	2	633.819	1266.63	-0.792634	119.358	13958	13958	MS2	10/114	170307_chiba_PAF15_02.raw
	High	DLIDEACWDITSSGISLQSMDSSHVSLVQLTLR	Unambiguous	4	2	NP_001081011.1;NP_001082364.1		CID	1	0	1	1	77.73	1.81304e-07	0	14.8885	1	3	1207.26	3619.76	0.150579	118.576	13855	13855	MS2	16/346	170307_chiba_PAF15_02.raw
	High	LMDLDVEQLGIPEQEYSCVIK	Unambiguous	4	2	NP_001081011.1;NP_001082364.1		CID	1	0	1	1	77.64	2.35035e-07	0	1.86926	11	2	1211.6	2422.19	0.863617	148.122	17732	17732	MS2	10/214	170307_chiba_PAF15_02.raw
	High	DLSQIGDAVVISCAK	Unambiguous	4	2	NP_001081011.1;NP_001082364.1		CID	1	0	1	1	77.56	2.85006e-07	0	34.5007	1	2	759.895	1518.78	-0.515543	112.099	12992	12992	MS2	11/156	170307_chiba_PAF15_02.raw
	High	DLSQIGDAVVISCAK	Unambiguous	4	2	NP_001081011.1;NP_001082364.1		CID	1	0	1	1	77.49	3.26175e-07	0	26.6361	5	2	759.896	1518.78	0.690063	144.494	17286	17286	MS2	11/156	170307_chiba_PAF15_02.raw
	High	LSQTSNVDKEEEAVTIEMNEPVQLTFALR	Unambiguous	4	2	NP_001081011.1;NP_001082364.1		CID	1	0	1	1	77.29	1.50244e-07	1	3.81953	0	3	1097.89	3291.64	-0.0798481	123.755	14542	14542	MS2	10/322	170307_chiba_PAF15_02.raw
	High	DLSQIGDAVVISCAK	Unambiguous	4	2	NP_001081011.1;NP_001082364.1		CID	1	0	1	1	77.28	3.20822e-07	0	24.6216	1	2	759.896	1518.78	0.368568	116.021	13515	13515	MS2	19/156	170307_chiba_PAF15_02.raw
	High	LSQTSNVDKEEEAVTIEMNEPVQLTFALR	Unambiguous	4	2	NP_001081011.1;NP_001082364.1		CID	1	0	1	1	77.24	1.51983e-07	1	6.71266	0	3	1097.89	3291.64	-0.0798481	132.292	15676	15676	MS2	10/322	170307_chiba_PAF15_02.raw
	High	AEDNADTVTMVFESPNQEK	Unambiguous	4	2	NP_001081011.1;NP_001082364.1		CID	1	0	1	1	77.08	8.71686e-08	0	58.3928	2	2	1062.97	2124.94	0.872621	83.6201	9121	9121	MS2	17/206	170307_chiba_PAF15_02.raw
	High	FSASGELGTGNVK	Unambiguous	4	2	NP_001081011.1;NP_001082364.1		CID	1	0	1	1	77.02	2.61171e-07	0	51.0148	1	2	633.819	1266.63	-1.2745	98.9779	11230	11230	MS2	11/114	170307_chiba_PAF15_02.raw
	High	DLSQIGDAVVISCAK	Unambiguous	4	2	NP_001081011.1;NP_001082364.1		CID	1	0	1	1	76.98	3.66818e-07	0	39.4563	2	2	759.896	1518.78	0.690063	139.797	16665	16665	MS2	10/156	170307_chiba_PAF15_02.raw
	High	LMDLDVEQLGIPEQEYSCVIK	Unambiguous	4	2	NP_001081011.1;NP_001082364.1		CID	1	0	1	1	76.96	2.54736e-07	0	14.3075	1	2	1211.6	2422.19	0.561238	109.263	12614	12614	MS2	10/214	170307_chiba_PAF15_02.raw
	High	DLSQIGDAVVISCAK	Unambiguous	4	2	NP_001081011.1;NP_001082364.1		CID	1	0	1	1	76.86	3.40004e-07	0	40.5755	8	2	759.895	1518.78	0.0470732	145.387	17399	17399	MS2	10/156	170307_chiba_PAF15_02.raw
	High	DLIDEACWDITSSGISLQSMDSSHVSLVQLTLR	Unambiguous	4	2	NP_001081011.1;NP_001082364.1		CID	1	0	1	1	76.86	2.23578e-07	0	13.6126	27	3	1207.26	3619.76	-0.355271	154.09	18386	18386	MS2	24/346	170307_chiba_PAF15_02.raw
	High	FSASGELGTGNVK	Unambiguous	4	2	NP_001081011.1;NP_001082364.1		CID	1	0	1	1	76.73	3.15302e-07	0	10.8169	1	2	633.82	1266.63	-0.407138	115.446	13437	13437	MS2	9/114	170307_chiba_PAF15_02.raw
	High	DLIDEACWDITSSGISLQSMDSSHVSLVQLTLR	Unambiguous	4	2	NP_001081011.1;NP_001082364.1		CID	1	0	1	1	76.63	2.32479e-07	0	5.89387	0	3	1207.26	3619.76	-0.051761	137.554	16370	16370	MS2	27/346	170307_chiba_PAF15_02.raw
	High	FSASGELGTGNVK	Unambiguous	4	2	NP_001081011.1;NP_001082364.1		CID	1	0	1	1	76.62	2.84191e-07	0	33.3734	1	2	633.82	1266.63	-0.503512	102.091	11651	11651	MS2	10/114	170307_chiba_PAF15_02.raw
	High	DLSQIGDAVVISCAK	Unambiguous	4	2	NP_001081011.1;NP_001082364.1		CID	1	0	1	1	76.49	3.74728e-07	0	51.7843	2	2	759.895	1518.78	0.207821	140.586	16770	16770	MS2	10/156	170307_chiba_PAF15_02.raw
	High	AEDNADTVTMVFESPNQEK	Unambiguous	4	2	NP_001081011.1;NP_001082364.1		CID	1	0	1	1	76.47	8.90424e-08	0	27.1094	1	2	1062.97	2124.94	-0.850774	79.3974	8529	8529	MS2	15/206	170307_chiba_PAF15_02.raw
	High	DLSQIGDAVVISCAK	Unambiguous	4	2	NP_001081011.1;NP_001082364.1		CID	1	0	1	1	76.42	4.17303e-07	0	37.7861	1	2	759.896	1518.78	0.690063	142.995	17086	17086	MS2	10/156	170307_chiba_PAF15_02.raw
	High	AEDNADTVTMVFESPNQEK	Unambiguous	4	2	NP_001081011.1;NP_001082364.1		CID	1	0	1	1	76.29	1.09258e-07	0	2.48255	0	2	1062.97	2124.94	0.0683705	69.8155	7171	7171	MS2	9/206	170307_chiba_PAF15_02.raw
	High	VLEALKDLIDEACWDITSSGISLQSMDSSHVSLVQLTLR	Unambiguous	4	2	NP_001081011.1;NP_001082364.1		CID	1	0	1	1	76.23	1.07204e-07	1	11.734	0	3	1425.06	4273.18	0.957129	142.291	16994	16994	MS2	19/438	170307_chiba_PAF15_02.raw
	High	DLSQIGDAVVISCAK	Unambiguous	4	2	NP_001081011.1;NP_001082364.1		CID	1	0	1	1	75.94	4.6607e-07	0	49.8367	2	2	759.896	1518.78	0.529315	137.903	16416	16416	MS2	11/156	170307_chiba_PAF15_02.raw
	High	DLSQIGDAVVISCAK	Unambiguous	4	2	NP_001081011.1;NP_001082364.1		CID	1	0	1	1	75.84	4.235e-07	0	19.4118	0	2	759.895	1518.78	-0.515543	93.4988	10490	10490	MS2	20/156	170307_chiba_PAF15_02.raw
	High	VLEALKDLIDEACWDITSSGISLQSMDSSHVSLVQLTLR	Unambiguous	4	2	NP_001081011.1;NP_001082364.1		CID	1	0	1	1	75.65	1.11631e-07	1	14.7706	2	3	1425.06	4273.17	-0.0712702	144.239	17252	17252	MS2	10/438	170307_chiba_PAF15_02.raw
	High	FSASGELGTGNVK	Unambiguous	4	2	NP_001081011.1;NP_001082364.1		CID	1	0	1	1	75.52	3.66109e-07	0	55.4359	1	2	633.819	1266.63	-0.889008	98.1714	11121	11121	MS2	11/114	170307_chiba_PAF15_02.raw
	High	DLIDEACWDITSSGISLQSMDSSHVSLVQLTLR	Unambiguous	4	2	NP_001081011.1;NP_001082364.1		CID	1	0	1	1	75.37	2.8169e-07	0	11.9665	7	3	1207.26	3619.77	0.959937	147.099	17609	17609	MS2	23/346	170307_chiba_PAF15_02.raw
	High	DLIDEACWDITSSGISLQSMDSSHVSLVQLTLR	Unambiguous	4	2	NP_001081011.1;NP_001082364.1		CID	1	0	1	1	74.97	3.34341e-07	0	7.0136	0	3	1207.26	3619.76	-0.152931	128.637	15193	15193	MS2	20/346	170307_chiba_PAF15_02.raw
	High	LSQTSNVDKEEEAVTIEMNEPVQLTFALR	Unambiguous	4	2	NP_001081011.1;NP_001082364.1		CID	1	0	1	1	74.88	2.29187e-07	1	41.632	1	2	1646.33	3291.64	0.424883	110.291	12752	12752	MS2	11/322	170307_chiba_PAF15_02.raw
	High	AEDNADTVTMVFESPNQEK	Unambiguous	4	2	NP_001081011.1;NP_001082364.1		CID	1	0	1	1	74.76	1.3702e-07	0	36.3385	0	3	708.984	2124.94	-0.770932	63.7082	6296	6296	MS2	24/206	170307_chiba_PAF15_02.raw
	High	DLIDEACWDITSSGISLQSMDSSHVSLVQLTLR	Unambiguous	4	2	NP_001081011.1;NP_001082364.1		CID	1	0	1	1	74.6	3.77943e-07	0	6.31259	0	3	1207.26	3619.76	0.251749	131.821	15613	15613	MS2	27/346	170307_chiba_PAF15_02.raw
	High	DLIDEACWDITSSGISLQSMDSSHVSLVQLTLR	Unambiguous	4	2	NP_001081011.1;NP_001082364.1		CID	1	0	1	1	74.56	3.76191e-07	0	25.9845	0	3	1207.26	3619.76	0.150579	143.124	17103	17103	MS2	22/346	170307_chiba_PAF15_02.raw
	High	DLSQIGDAVVISCAK	Unambiguous	4	2	NP_001081011.1;NP_001082364.1		CID	1	0	1	1	74.5	6.08505e-07	0	52.9257	2	2	759.896	1518.78	0.368568	141.556	16897	16897	MS2	13/156	170307_chiba_PAF15_02.raw
	High	AEDNADTVTMVFESPNQEK	Unambiguous	4	2	NP_001081011.1;NP_001082364.1		CID	1	0	1	1	74.5	1.64988e-07	0	12.1782	2	2	1062.97	2124.94	0.0683705	84.402	9235	9235	MS2	18/206	170307_chiba_PAF15_02.raw
	High	VLEALKDLIDEACWDITSSGISLQSMDSSHVSLVQLTLR	Unambiguous	4	2	NP_001081011.1;NP_001082364.1		CID	1	0	1	1	74.36	1.48407e-07	1	25.1583	1	3	1425.06	4273.17	0.18583	143.147	17106	17106	MS2	26/438	170307_chiba_PAF15_02.raw
	High	AEDNADTVTMVFESPNQEK	Unambiguous	4	2	NP_001081011.1;NP_001082364.1		CID	1	0	1	1	74.25	1.48456e-07	0	3.38884	0	3	708.984	2124.94	-0.943272	65.1117	6499	6499	MS2	23/206	170307_chiba_PAF15_02.raw
	High	DLSQIGDAVVISCAK	Unambiguous	4	2	NP_001081011.1;NP_001082364.1		CID	1	0	1	1	74.14	6.61095e-07	0	34.0934	1	2	759.896	1518.78	0.368568	116.979	13642	13642	MS2	17/156	170307_chiba_PAF15_02.raw
	High	LSQTSNVDKEEEAVTIEMNEPVQLTFALR	Unambiguous	4	2	NP_001081011.1;NP_001082364.1		CID	1	0	1	1	73.96	2.97325e-07	1	7.98418	1	3	1097.88	3291.64	-0.524868	145.507	17414	17414	MS2	10/322	170307_chiba_PAF15_02.raw
	High	DLSQIGDAVVISCAK	Unambiguous	4	2	NP_001081011.1;NP_001082364.1		CID	1	0	1	1	73.94	6.66015e-07	0	37.6358	0	2	759.895	1518.78	0.0470732	99.4305	11291	11291	MS2	13/156	170307_chiba_PAF15_02.raw
	High	LMDLDVEQLGIPEQEYSCVIK	Unambiguous	4	2	NP_001081011.1;NP_001082364.1		CID	1	0	1	1	73.82	5.24917e-07	0	73.1081	11	2	1211.6	2422.19	0.662031	154.377	18420	18420	MS2	13/214	170307_chiba_PAF15_02.raw
	High	LSQTSNVDKEEEAVTIEMNEPVQLTFALR	Unambiguous	4	2	NP_001081011.1;NP_001082364.1		CID	1	0	1	1	73.75	3.35249e-07	1	5.53379	0	3	1097.89	3291.64	-0.302358	122.174	14332	14332	MS2	10/322	170307_chiba_PAF15_02.raw
	High	LSQTSNVDKEEEAVTIEMNEPVQLTFALR	Unambiguous	4	2	NP_001081011.1;NP_001082364.1		CID	1	0	1	1	73.4	3.40531e-07	1	0	8	3	1097.89	3291.64	0.698935	152.226	18184	18184	MS2	10/322	170307_chiba_PAF15_02.raw
	High	LSQTSNVDKEEEAVTIEMNEPVQLTFALR	Unambiguous	4	2	NP_001081011.1;NP_001082364.1		CID	1	0	1	1	73.16	3.71955e-07	1	3.16371	0	3	1097.88	3291.64	-0.636123	119.799	14017	14017	MS2	10/322	170307_chiba_PAF15_02.raw
	High	LSQTSNVDKEEEAVTIEMNEPVQLTFALR	Unambiguous	4	2	NP_001081011.1;NP_001082364.1		CID	1	0	1	1	73.13	3.86694e-07	1	5.32308	0	3	1097.88	3291.64	-0.969887	121.383	14227	14227	MS2	10/322	170307_chiba_PAF15_02.raw
	High	LSQTSNVDKEEEAVTIEMNEPVQLTFALR	Unambiguous	4	2	NP_001081011.1;NP_001082364.1		CID	1	0	1	1	72.79	4.94456e-07	1	16.1325	26	3	1097.89	3291.65	1.58897	153.22	18294	18294	MS2	9/322	170307_chiba_PAF15_02.raw
	High	CAAGEDIITLR	Unambiguous	1	1	NP_001082364.1		CID	1	0	1	1	72.52	1.31823e-06	0	24.0192	1	2	581.3	1161.59	0.00690216	68.3671	6969	6969	MS2	9/88	170307_chiba_PAF15_02.raw
	High	AEDNADTVTMVFESPNQEK	Unambiguous	4	2	NP_001081011.1;NP_001082364.1		CID	1	0	1	1	72.13	2.38817e-07	0	37.6241	2	2	1062.97	2124.94	0.298156	82.9828	9031	9031	MS2	17/206	170307_chiba_PAF15_02.raw
	High	DLSQIGDAVVISCAK	Unambiguous	4	2	NP_001081011.1;NP_001082364.1		CID	1	0	1	1	71.74	9.17742e-07	0	45.5082	26	2	759.895	1518.78	-0.756665	152.185	18179	18179	MS2	10/156	170307_chiba_PAF15_02.raw
	High	AEDNADTVTMVFESPNQEK	Unambiguous	4	2	NP_001081011.1;NP_001082364.1		CID	1	0	1	1	71.72	3.19664e-07	0	0	2	2	1062.97	2124.94	-0.161416	93.6209	10507	10507	MS2	9/206	170307_chiba_PAF15_02.raw
	High	LSQTSNVDKEEEAVTIEMNEPVQLTFALR	Unambiguous	4	2	NP_001081011.1;NP_001082364.1		CID	1	0	1	1	71.65	5.4371e-07	1	8.94909	0	3	1097.89	3291.64	-0.191103	143.876	17204	17204	MS2	12/322	170307_chiba_PAF15_02.raw
	High	FSASGELGTGNVK	Unambiguous	4	2	NP_001081011.1;NP_001082364.1		CID	1	0	1	1	71.24	9.80868e-07	0	34.9564	0	2	633.819	1266.63	-0.792634	61.5808	5977	5977	MS2	11/114	170307_chiba_PAF15_02.raw
	High	DLIDEACWDITSSGISLQSMDSSHVSLVQLTLR	Unambiguous	4	2	NP_001081011.1;NP_001082364.1		CID	1	0	1	1	71.13	7.47776e-07	0	4.18445	7	3	1207.26	3619.77	0.959937	149.72	17899	17899	MS2	20/346	170307_chiba_PAF15_02.raw
	High	LMDLDVEQLGIPEQEYSCVIK	Unambiguous	4	2	NP_001081011.1;NP_001082364.1		CID	1	0	1	1	70.82	1.19638e-06	0	8.296	0	2	1211.6	2422.19	-0.54749	91.5365	10222	10222	MS2	9/214	170307_chiba_PAF15_02.raw
	High	LSQTSNVDKEEEAVTIEMNEPVQLTFALR	Unambiguous	4	2	NP_001081011.1;NP_001082364.1		CID	1	0	1	1	70.52	7.05289e-07	1	7.0893	0	3	1097.89	3291.64	-0.191103	134.679	15992	15992	MS2	14/322	170307_chiba_PAF15_02.raw
	High	LMDLDVEQLGIPEQEYSCVIK	Unambiguous	4	2	NP_001081011.1;NP_001082364.1		CID	1	0	1	1	70.51	1.29823e-06	0	25.1381	1	2	1211.6	2422.19	-0.648284	106.746	12280	12280	MS2	9/214	170307_chiba_PAF15_02.raw
	High	DLSQIGDAVVISCAK	Unambiguous	4	2	NP_001081011.1;NP_001082364.1		CID	1	0	1	1	70.36	1.44511e-06	0	49.6035	2	2	759.895	1518.78	-0.435169	135.975	16162	16162	MS2	11/156	170307_chiba_PAF15_02.raw
	High	LMDLDVEQLGIPEQEYSCVIK	Unambiguous	4	2	NP_001081011.1;NP_001082364.1		CID	1	0	1	1	70.33	1.36244e-06	0	67.9731	3	2	1211.6	2422.19	0.158064	142.042	16962	16962	MS2	22/214	170307_chiba_PAF15_02.raw
	High	FSASGELGTGNVK	Unambiguous	4	2	NP_001081011.1;NP_001082364.1		CID	1	0	1	1	70.32	1.45848e-06	0	20.4449	1	2	633.82	1266.63	-0.310764	84.0154	9179	9179	MS2	10/114	170307_chiba_PAF15_02.raw
	High	LMDLDVEQLGIPEQEYSCVIK	Unambiguous	4	2	NP_001081011.1;NP_001082364.1		CID	1	0	1	1	70.31	1.35942e-06	0	58.6943	3	2	1211.6	2422.19	-0.24511	126.838	14952	14952	MS2	9/214	170307_chiba_PAF15_02.raw
	High	DLSQIGDAVVISCAK	Unambiguous	4	2	NP_001081011.1;NP_001082364.1		CID	1	0	1	1	70.1	1.63199e-06	0	36.373	1	2	759.895	1518.78	0.127447	103.611	11856	11856	MS2	9/156	170307_chiba_PAF15_02.raw
	High	LSQTSNVDKEEEAVTIEMNEPVQLTFALR	Unambiguous	4	2	NP_001081011.1;NP_001082364.1		CID	1	0	1	1	69.79	7.71414e-07	1	7.0638	0	3	1097.89	3291.64	0.58768	138.516	16497	16497	MS2	10/322	170307_chiba_PAF15_02.raw
	High	ATPLSPTVILSMSADIPLVVEYK	Unambiguous	3	2	NP_001081011.1;NP_001082364.1		CID	1	0	1	1	69.69	8.37712e-07	0	2.32995	0	3	815.45	2444.34	0.323484	139.3	16600	16600	MS2	10/214	170307_chiba_PAF15_02.raw
	High	DLSQIGDAVVISCAK	Unambiguous	4	2	NP_001081011.1;NP_001082364.1		CID	1	0	1	1	69.59	1.72544e-06	0	48.5735	1	2	759.895	1518.78	-0.274422	110.679	12804	12804	MS2	12/156	170307_chiba_PAF15_02.raw
	High	DLIDEACWDITSSGISLQSMDSSHVSLVQLTLR	Unambiguous	4	2	NP_001081011.1;NP_001082364.1		CID	1	0	1	1	69.56	1.18962e-06	0	11.1515	0	3	1207.26	3619.76	0.0494089	143.884	17205	17205	MS2	26/346	170307_chiba_PAF15_02.raw
	High	DLIDEACWDITSSGISLQSMDSSHVSLVQLTLR	Unambiguous	4	2	NP_001081011.1;NP_001082364.1		CID	1	0	1	1	69.27	1.27177e-06	0	10.2556	2	3	1207.26	3619.76	0.0494089	145.365	17396	17396	MS2	20/346	170307_chiba_PAF15_02.raw
	High	CAAGEDIITLR	Unambiguous	1	1	NP_001082364.1		CID	1	0	1	1	69.1	2.93419e-06	0	34.2837	1	2	581.3	1161.59	-0.62363	68.2293	6950	6950	MS2	9/88	170307_chiba_PAF15_02.raw
	High	DLSQIGDAVVISCAK	Unambiguous	4	2	NP_001081011.1;NP_001082364.1		CID	1	0	1	1	69.06	2.07356e-06	0	41.9111	1	2	759.896	1518.78	0.288194	115.13	13394	13394	MS2	19/156	170307_chiba_PAF15_02.raw
	High	CAAGEDIITLR	Unambiguous	1	1	NP_001082364.1		CID	1	0	1	1	68.99	3.00946e-06	0	47.9567	1	2	581.3	1161.59	-0.728719	61.0465	5899	5899	MS2	9/88	170307_chiba_PAF15_02.raw
	High	DLIDEACWDITSSGISLQSMDSSHVSLVQLTLR	Unambiguous	4	2	NP_001081011.1;NP_001082364.1		CID	1	0	1	1	68.8	1.41713e-06	0	3.95134	0	3	1207.26	3619.76	0.150579	137.078	16307	16307	MS2	26/346	170307_chiba_PAF15_02.raw
	High	LSQTSNVDKEEEAVTIEMNEPVQLTFALR	Unambiguous	4	2	NP_001081011.1;NP_001082364.1		CID	1	0	1	1	68.78	9.27039e-07	1	3.78957	0	3	1097.89	3291.64	0.0314067	111.279	12883	12883	MS2	17/322	170307_chiba_PAF15_02.raw
	High	DLSQIGDAVVISCAK	Unambiguous	4	2	NP_001081011.1;NP_001082364.1		CID	1	0	1	1	68.43	1.96662e-06	0	22.7492	1	2	759.895	1518.78	-0.917413	101.942	11630	11630	MS2	12/156	170307_chiba_PAF15_02.raw
	High	AEDNADTVTMVFESPNQEK	Unambiguous	4	2	NP_001081011.1;NP_001082364.1		CID	1	0	1	1	68.22	6.7044e-07	0	51.0499	5	2	1062.97	2124.94	0.757728	139.683	16650	16650	MS2	9/206	170307_chiba_PAF15_02.raw
	High	LMDLDVEQLGIPEQEYSCVIK	Unambiguous	4	2	NP_001081011.1;NP_001082364.1		CID	1	0	1	1	67.96	2.34335e-06	0	43.8165	3	2	1211.6	2422.19	-0.446697	135.219	16063	16063	MS2	12/214	170307_chiba_PAF15_02.raw
	High	LSQTSNVDKEEEAVTIEMNEPVQLTFALR	Unambiguous	4	2	NP_001081011.1;NP_001082364.1		CID	1	0	1	1	67.86	1.21124e-06	1	6.38661	0	3	1097.88	3291.64	-0.524868	135.641	16118	16118	MS2	9/322	170307_chiba_PAF15_02.raw
	High	DLSQIGDAVVISCAK	Unambiguous	4	2	NP_001081011.1;NP_001082364.1		CID	1	0	1	1	67.84	1.87458e-06	0	44.9599	7	2	759.897	1518.79	1.73492	146.246	17503	17503	MS2	16/156	170307_chiba_PAF15_02.raw
	High	LSQTSNVDKEEEAVTIEMNEPVQLTFALR	Unambiguous	4	2	NP_001081011.1;NP_001082364.1		CID	1	0	1	1	67.81	1.2915e-06	1	6.36545	3	3	1097.89	3291.64	0.81019	147.247	17627	17627	MS2	9/322	170307_chiba_PAF15_02.raw
	High	DLSQIGDAVVISCAK	Unambiguous	4	2	NP_001081011.1;NP_001082364.1		CID	1	0	1	1	67.73	2.60572e-06	0	56.4641	2	2	759.895	1518.78	-0.0333005	134.876	16018	16018	MS2	11/156	170307_chiba_PAF15_02.raw
	High	DLSQIGDAVVISCAK	Unambiguous	4	2	NP_001081011.1;NP_001082364.1		CID	1	0	1	1	67.68	2.33733e-06	0	40.4452	0	2	759.895	1518.78	-0.676291	97.8589	11079	11079	MS2	11/156	170307_chiba_PAF15_02.raw
	High	VLEALKDLIDEACWDITSSGISLQSMDSSHVSLVQLTLR	Unambiguous	4	2	NP_001081011.1;NP_001082364.1		CID	1	0	1	1	67.64	7.74841e-07	1	14.1176	17	3	1425.06	4273.18	0.871429	148.305	17755	17755	MS2	21/438	170307_chiba_PAF15_02.raw
	High	DLSQIGDAVVISCAK	Unambiguous	4	2	NP_001081011.1;NP_001082364.1		CID	1	0	1	1	67.52	3.2393e-06	0	46.7655	1	2	759.896	1518.78	0.609689	115.431	13435	13435	MS2	16/156	170307_chiba_PAF15_02.raw
	High	LSQTSNVDKEEEAVTIEMNEPVQLTFALR	Unambiguous	4	2	NP_001081011.1;NP_001082364.1		CID	1	0	1	1	67.52	1.23908e-06	1	3.8814	0	3	1097.89	3291.64	0.0314067	140.104	16706	16706	MS2	9/322	170307_chiba_PAF15_02.raw
	High	LSQTSNVDKEEEAVTIEMNEPVQLTFALR	Unambiguous	4	2	NP_001081011.1;NP_001082364.1		CID	1	0	1	1	67.48	1.42026e-06	1	5.32231	0	3	1097.89	3291.64	-0.191103	96.9164	10951	10951	MS2	9/322	170307_chiba_PAF15_02.raw
	High	DLIDEACWDITSSGISLQSMDSSHVSLVQLTLR	Unambiguous	4	2	NP_001081011.1;NP_001082364.1		CID	1	0	1	1	67.37	1.99722e-06	0	8.05411	0	3	1207.26	3619.76	0.251749	129.438	15298	15298	MS2	26/346	170307_chiba_PAF15_02.raw
	High	LSQTSNVDKEEEAVTIEMNEPVQLTFALR	Unambiguous	4	2	NP_001081011.1;NP_001082364.1		CID	1	0	1	1	67.32	1.69598e-06	1	4.33871	1	3	1097.89	3291.65	2.14524	146.375	17519	17519	MS2	9/322	170307_chiba_PAF15_02.raw
	High	LSQTSNVDKEEEAVTIEMNEPVQLTFALR	Unambiguous	4	2	NP_001081011.1;NP_001082364.1		CID	1	0	1	1	67.17	1.34307e-06	1	8.94743	0	3	1097.89	3291.64	0.0314067	114.297	13283	13283	MS2	9/322	170307_chiba_PAF15_02.raw
	High	DLSQIGDAVVISCAK	Unambiguous	4	2	NP_001081011.1;NP_001082364.1		CID	1	0	1	1	67.03	3.111e-06	0	30.1823	0	2	759.895	1518.78	-0.435169	98.3287	11142	11142	MS2	13/156	170307_chiba_PAF15_02.raw
	High	DLSQIGDAVVISCAK	Unambiguous	4	2	NP_001081011.1;NP_001082364.1		CID	1	0	1	1	67	3.13256e-06	0	24.5562	0	2	759.895	1518.78	-0.435169	95.0659	10700	10700	MS2	11/156	170307_chiba_PAF15_02.raw
	High	DLIDEACWDITSSGISLQSMDSSHVSLVQLTLR	Unambiguous	4	2	NP_001081011.1;NP_001082364.1		CID	1	0	1	1	66.92	2.13397e-06	0	7.55659	0	3	1207.26	3619.76	-0.152931	136.272	16201	16201	MS2	25/346	170307_chiba_PAF15_02.raw
	High	LMDLDVEQLGIPEQEYSCVIK	Unambiguous	4	2	NP_001081011.1;NP_001082364.1		CID	1	0	1	1	66.88	3.00495e-06	0	32.9286	2	2	1211.6	2422.19	-0.446697	112.751	13079	13079	MS2	9/214	170307_chiba_PAF15_02.raw
	High	FSASGELGTGNVK	Unambiguous	4	2	NP_001081011.1;NP_001082364.1		CID	1	0	1	1	66.76	2.75176e-06	0	39.1027	1	2	633.819	1266.63	-0.69626	86.5312	9528	9528	MS2	11/114	170307_chiba_PAF15_02.raw
	High	LMDLDVEQLGIPEQEYSCVIK	Unambiguous	4	2	NP_001081011.1;NP_001082364.1		CID	1	0	1	1	66.62	3.17946e-06	0	4.79836	0	2	1211.6	2422.19	-0.648284	95.3833	10742	10742	MS2	11/214	170307_chiba_PAF15_02.raw
	High	FSASGELGTGNVK	Unambiguous	4	2	NP_001081011.1;NP_001082364.1		CID	1	0	1	1	66.61	2.84846e-06	0	44.7398	1	2	633.819	1266.63	-0.792634	87.1765	9617	9617	MS2	11/114	170307_chiba_PAF15_02.raw
	High	LMDLDVEQLGIPEQEYSCVIK	Unambiguous	4	2	NP_001081011.1;NP_001082364.1		CID	1	0	1	1	66.41	3.35983e-06	0	33.9578	2	2	1211.6	2422.19	0.158064	132.502	15704	15704	MS2	9/214	170307_chiba_PAF15_02.raw
	High	LmDLDVEQLGIPEQEYSCVIK	Unambiguous	4	2	NP_001081011.1;NP_001082364.1	M2(Oxidation)	CID	1	0	1	1	66.39	3.3983e-06	0	17.4158	0	2	1219.6	2438.18	0.440217	87.0027	9592	9592	MS2	17/214	170307_chiba_PAF15_02.raw
	High	DLSQIGDAVVISCAK	Unambiguous	4	2	NP_001081011.1;NP_001082364.1		CID	1	0	1	1	66.32	3.85021e-06	0	54.3801	2	2	759.895	1518.78	0.0470732	136.627	16248	16248	MS2	12/156	170307_chiba_PAF15_02.raw
	High	LSQTSNVDKEEEAVTIEMNEPVQLTFALR	Unambiguous	4	2	NP_001081011.1;NP_001082364.1		CID	1	0	1	1	66.25	1.75482e-06	1	27.317	1	2	1646.32	3291.64	-0.465155	103.559	11849	11849	MS2	12/322	170307_chiba_PAF15_02.raw
	High	DLIDEACWDITSSGISLQSMDSSHVSLVQLTLR	Unambiguous	4	2	NP_001081011.1;NP_001082364.1		CID	1	0	1	1	66.04	2.62574e-06	0	4.92093	0	3	1207.26	3619.76	-0.254101	123.119	14458	14458	MS2	31/346	170307_chiba_PAF15_02.raw
	High	DLSQIGDAVVISCAK	Unambiguous	4	2	NP_001081011.1;NP_001082364.1		CID	1	0	1	1	65.95	3.48113e-06	0	29.8687	0	2	759.895	1518.78	-0.756665	96.3698	10876	10876	MS2	11/156	170307_chiba_PAF15_02.raw
	High	LVQGSILK	Unambiguous	4	2	NP_001081011.1;NP_001082364.1		CID	0.5758	0	1	1	65.93	5.09264e-06	0	6.4994	0	2	429.276	857.545	-1.07054	45.7688	3580	3580	MS2	7/66	170307_chiba_PAF15_02.raw
	High	LSQTSNVDKEEEAVTIEMNEPVQLTFALR	Unambiguous	4	2	NP_001081011.1;NP_001082364.1		CID	1	0	1	1	65.73	1.8711e-06	1	3.1435	0	3	1097.89	3291.64	0.0314067	112.07	12988	12988	MS2	10/322	170307_chiba_PAF15_02.raw
	High	VLEALKDLIDEACWDITSSGISLQSMDSSHVSLVQLTLR	Unambiguous	4	2	NP_001081011.1;NP_001082364.1		CID	1	0	1	1	65.67	1.20604e-06	1	3.04485	26	3	1425.06	4273.18	0.700029	148.18	17740	17740	MS2	22/438	170307_chiba_PAF15_02.raw
	High	FSASGELGTGNVK	Unambiguous	4	2	NP_001081011.1;NP_001082364.1		CID	1	0	1	1	65.52	3.68915e-06	0	12.3078	0	2	633.819	1266.63	-1.46725	45.1513	3482	3482	MS2	8/114	170307_chiba_PAF15_02.raw
	High	LSQTSNVDKEEEAVTIEMNEPVQLTFALR	Unambiguous	4	2	NP_001081011.1;NP_001082364.1		CID	1	0	1	1	65.46	2.00535e-06	1	5.04892	0	3	1097.89	3291.64	0.365171	99.2469	11266	11266	MS2	10/322	170307_chiba_PAF15_02.raw
	High	LMDLDVEQLGIPEQEYSCVIK	Unambiguous	4	2	NP_001081011.1;NP_001082364.1		CID	1	0	1	1	65.44	4.10064e-06	0	6.55424	36	2	1211.6	2422.19	-0.0435226	151.708	18125	18125	MS2	13/214	170307_chiba_PAF15_02.raw
	High	AEDNADTVTMVFESPNQEK	Unambiguous	4	2	NP_001081011.1;NP_001082364.1		CID	1	0	1	1	65.32	1.2485e-06	0	9.69434	0	3	708.984	2124.94	-0.684762	68.194	6945	6945	MS2	18/206	170307_chiba_PAF15_02.raw
	High	LMDLDVEQLGIPEQEYSCVIK	Unambiguous	4	2	NP_001081011.1;NP_001082364.1		CID	1	0	1	1	64.97	4.02801e-06	0	12.1315	13	2	1211.6	2422.19	0.662031	149.764	17905	17905	MS2	11/214	170307_chiba_PAF15_02.raw
	High	LSQTSNVDKEEEAVTIEMNEPVQLTFALR	Unambiguous	4	2	NP_001081011.1;NP_001082364.1		CID	1	0	1	1	64.84	2.42791e-06	1	38.8131	0	2	1646.33	3291.65	1.09241	100.533	11440	11440	MS2	12/322	170307_chiba_PAF15_02.raw
	High	DLIDEACWDITSSGISLQSMDSSHVSLVQLTLR	Unambiguous	4	2	NP_001081011.1;NP_001082364.1		CID	1	0	1	1	64.74	3.59239e-06	0	4.46774	0	3	1207.26	3619.76	-0.051761	126.131	14857	14857	MS2	39/346	170307_chiba_PAF15_02.raw
	High	FSASGELGTGNVK	Unambiguous	4	2	NP_001081011.1;NP_001082364.1		CID	1	0	1	1	64.21	4.98799e-06	0	56.5634	0	2	633.819	1266.63	-1.17813	75.8516	8016	8016	MS2	10/114	170307_chiba_PAF15_02.raw
	High	FSASGELGTGNVK	Unambiguous	4	2	NP_001081011.1;NP_001082364.1		CID	1	0	1	1	64.18	5.67187e-06	0	23.8841	1	2	633.82	1266.63	-0.407138	90.9652	10144	10144	MS2	10/114	170307_chiba_PAF15_02.raw
	High	ATPLSPTVILSMSADIPLVVEYK	Unambiguous	3	2	NP_001081011.1;NP_001082364.1		CID	1	0	1	1	64.02	3.01171e-06	0	25.4783	17	2	1222.67	2444.34	1.27784	154.291	18409	18409	MS2	15/214	170307_chiba_PAF15_02.raw
	High	LSQTSNVDKEEEAVTIEMNEPVQLTFALR	Unambiguous	4	2	NP_001081011.1;NP_001082364.1		CID	1	0	1	1	63.98	2.79961e-06	1	6.97547	0	3	1097.89	3291.64	0.142662	89.9625	10006	10006	MS2	9/322	170307_chiba_PAF15_02.raw
	High	LSQTSNVDKEEEAVTIEMNEPVQLTFALR	Unambiguous	4	2	NP_001081011.1;NP_001082364.1		CID	1	0	1	1	63.9	3.03498e-06	1	3.81389	3	3	1097.89	3291.64	0.698935	149.705	17897	17897	MS2	9/322	170307_chiba_PAF15_02.raw
	High	LSQTSNVDKEEEAVTIEMNEPVQLTFALR	Unambiguous	4	2	NP_001081011.1;NP_001082364.1		CID	1	0	1	1	63.82	3.07066e-06	1	3.72782	0	3	1097.88	3291.64	-0.524868	106.239	12211	12211	MS2	9/322	170307_chiba_PAF15_02.raw
	High	LSQTSNVDKEEEAVTIEMNEPVQLTFALR	Unambiguous	4	2	NP_001081011.1;NP_001082364.1		CID	1	0	1	1	63.75	3.24706e-06	1	2.81526	0	3	1097.88	3291.64	-0.636123	124.548	14647	14647	MS2	9/322	170307_chiba_PAF15_02.raw
	High	DLSQIGDAVVISCAK	Unambiguous	4	2	NP_001081011.1;NP_001082364.1		CID	1	0	1	1	63.73	6.65119e-06	0	29.8761	0	2	759.895	1518.78	-0.435169	100.687	11461	11461	MS2	13/156	170307_chiba_PAF15_02.raw
	High	LSQTSNVDKEEEAVTIEMNEPVQLTFALR	Unambiguous	4	2	NP_001081011.1;NP_001082364.1		CID	1	0	1	1	63.7	2.98606e-06	1	6.10601	0	3	1097.89	3291.64	0.142662	89.0635	9880	9880	MS2	9/322	170307_chiba_PAF15_02.raw
	High	VLEALKDLIDEACWDITSSGISLQSMDSSHVSLVQLTLR	Unambiguous	4	2	NP_001081011.1;NP_001082364.1		CID	1	0	1	1	63.36	2.32965e-06	1	24.6745	1	3	1425.06	4273.18	1.55703	142.865	17069	17069	MS2	27/438	170307_chiba_PAF15_02.raw
	High	LSQTSNVDKEEEAVTIEMNEPVQLTFALR	Unambiguous	4	2	NP_001081011.1;NP_001082364.1		CID	1	0	1	1	63.35	3.3985e-06	1	3.71484	3	3	1097.89	3291.64	0.58768	150.5	17982	17982	MS2	9/322	170307_chiba_PAF15_02.raw
	High	LSQTSNVDKEEEAVTIEMNEPVQLTFALR	Unambiguous	4	2	NP_001081011.1;NP_001082364.1		CID	1	0	1	1	63.34	3.6844e-06	1	4.70837	0	3	1097.89	3291.64	-0.302358	116.635	13597	13597	MS2	9/322	170307_chiba_PAF15_02.raw
	High	LMDLDVEQLGIPEQEYSCVIK	Unambiguous	4	2	NP_001081011.1;NP_001082364.1		CID	1	0	1	1	63.17	7.03644e-06	0	38.3438	0	2	1211.6	2422.19	-0.24511	103.668	11864	11864	MS2	9/214	170307_chiba_PAF15_02.raw
	High	CAAGEDIITLR	Unambiguous	1	1	NP_001082364.1		CID	1	0	1	1	62.98	1.20085e-05	0	35.3206	1	2	581.3	1161.59	-0.728719	67.9811	6915	6915	MS2	8/88	170307_chiba_PAF15_02.raw
	High	LSQTSNVDKEEEAVTIEMNEPVQLTFALR	Unambiguous	4	2	NP_001081011.1;NP_001082364.1		CID	1	0	1	1	62.95	4.03058e-06	1	4.93687	0	3	1097.89	3291.64	-0.191103	119.009	13912	13912	MS2	9/322	170307_chiba_PAF15_02.raw
	High	LSQTSNVDKEEEAVTIEMNEPVQLTFALR	Unambiguous	4	2	NP_001081011.1;NP_001082364.1		CID	1	0	1	1	62.88	4.09607e-06	1	3.47228	0	3	1097.89	3291.64	-0.191103	110.174	12736	12736	MS2	9/322	170307_chiba_PAF15_02.raw
	High	LMDLDVEQLGIPEQEYSCVIK	Unambiguous	4	2	NP_001081011.1;NP_001082364.1		CID	1	0	1	1	62.71	7.68868e-06	0	38.6015	3	2	1211.6	2422.19	0.0572708	144.246	17253	17253	MS2	13/214	170307_chiba_PAF15_02.raw
	High	LVQGSILKK	Unambiguous	4	2	NP_001081011.1;NP_001082364.1		CID	1	0	1	1	62.67	3.89343e-06	1	9.72669	0	2	493.323	985.64	-0.992624	42.9963	3139	3139	MS2	8/76	170307_chiba_PAF15_02.raw
	High	DLSQIGDAVVISCAK	Unambiguous	4	2	NP_001081011.1;NP_001082364.1		CID	1	0	1	1	62.63	7.47688e-06	0	43.0578	1	2	759.895	1518.78	-0.595917	118.431	13835	13835	MS2	9/156	170307_chiba_PAF15_02.raw
	High	LSQTSNVDKEEEAVTIEMNEPVQLTFALR	Unambiguous	4	2	NP_001081011.1;NP_001082364.1		CID	1	0	1	1	62.52	4.17019e-06	1	0	13	3	1097.89	3291.64	0.698935	152.426	18206	18206	MS2	9/322	170307_chiba_PAF15_02.raw
	High	DLSQIGDAVVISCAK	Unambiguous	4	2	NP_001081011.1;NP_001082364.1		CID	1	0	1	1	62.2	9.39993e-06	0	38.155	0	2	759.894	1518.78	-1.07816	99.8742	11352	11352	MS2	11/156	170307_chiba_PAF15_02.raw
	High	LSQTSNVDKEEEAVTIEMNEPVQLTFALR	Unambiguous	4	2	NP_001081011.1;NP_001082364.1		CID	1	0	1	1	62.05	5.89429e-06	1	45.4835	0	2	1646.33	3291.65	1.90828	89.0916	9884	9884	MS2	12/322	170307_chiba_PAF15_02.raw
	High	ATPLSPTVILSMSADIPLVVEYK	Unambiguous	3	2	NP_001081011.1;NP_001082364.1		CID	1	0	1	1	61.9	4.84241e-06	0	5.19905	0	3	815.45	2444.34	0.0987538	124.233	14605	14605	MS2	21/214	170307_chiba_PAF15_02.raw
	High	LMDLDVEQLGIPEQEYSCVIK	Unambiguous	4	2	NP_001081011.1;NP_001082364.1		CID	1	0	1	1	61.78	9.72384e-06	0	18.627	2	2	1211.6	2422.19	-0.446697	124.957	14701	14701	MS2	20/214	170307_chiba_PAF15_02.raw
	High	LSQTSNVDKEEEAVTIEMNEPVQLTFALR	Unambiguous	4	2	NP_001081011.1;NP_001082364.1		CID	1	0	1	1	61.48	4.97849e-06	1	59.8256	1	2	1646.33	3291.65	1.16658	102.097	11652	11652	MS2	10/322	170307_chiba_PAF15_02.raw
	High	DLIDEACWDITSSGISLQSMDSSHVSLVQLTLR	Unambiguous	4	2	NP_001081011.1;NP_001082364.1		CID	1	0	1	1	61.48	7.07657e-06	0	21.6278	2	2	1810.39	3619.77	0.94679	135.286	16072	16072	MS2	9/346	170307_chiba_PAF15_02.raw
	High	DLSQIGDAVVISCAK	Unambiguous	4	2	NP_001081011.1;NP_001082364.1		CID	1	0	1	1	61.44	1.10899e-05	0	28.1662	0	2	759.895	1518.78	-0.0333005	95.6984	10785	10785	MS2	11/156	170307_chiba_PAF15_02.raw
	High	LSQTSNVDKEEEAVTIEMNEPVQLTFALR	Unambiguous	4	2	NP_001081011.1;NP_001082364.1		CID	1	0	1	1	61.42	5.22803e-06	1	33.4441	0	2	1646.33	3291.64	1.01824	90.1207	10028	10028	MS2	10/322	170307_chiba_PAF15_02.raw
	High	DLIDEACWDITSSGISLQSMDSSHVSLVQLTLR	Unambiguous	4	2	NP_001081011.1;NP_001082364.1		CID	1	0	1	1	61.4	7.6428e-06	0	3.2159	0	3	1207.26	3619.76	-0.254101	130.243	15404	15404	MS2	28/346	170307_chiba_PAF15_02.raw
	High	DLIDEACWDITSSGISLQSMDSSHVSLVQLTLR	Unambiguous	4	2	NP_001081011.1;NP_001082364.1		CID	1	0	1	1	61.23	7.91023e-06	0	3.81972	0	3	1207.26	3619.76	-0.152931	134.671	15991	15991	MS2	25/346	170307_chiba_PAF15_02.raw
	High	LSQTSNVDKEEEAVTIEMNEPVQLTFALR	Unambiguous	4	2	NP_001081011.1;NP_001082364.1		CID	1	0	1	1	60.98	7.42135e-06	1	43.0009	1	2	1646.33	3291.65	1.75994	105.281	12083	12083	MS2	13/322	170307_chiba_PAF15_02.raw
	High	VLEALKDLIDEACWDITSSGISLQSMDSSHVSLVQLTLR	Unambiguous	4	2	NP_001081011.1;NP_001082364.1		CID	1	0	1	1	60.86	4.75804e-06	1	9.45564	21	3	1425.07	4273.18	2.32832	147.824	17698	17698	MS2	9/438	170307_chiba_PAF15_02.raw
	High	DLIDEACWDITSSGISLQSMDSSHVSLVQLTLR	Unambiguous	4	2	NP_001081011.1;NP_001082364.1		CID	1	0	1	1	60.77	8.96156e-06	0	21.5522	25	3	1207.26	3619.76	-0.051761	152.82	18250	18250	MS2	31/346	170307_chiba_PAF15_02.raw
	High	DLSQIGDAVVISCAK	Unambiguous	4	2	NP_001081011.1;NP_001082364.1		CID	1	0	1	1	60.56	1.45039e-05	0	38.5884	0	2	759.895	1518.78	0.0470732	91.0312	10153	10153	MS2	11/156	170307_chiba_PAF15_02.raw
	High	LSQTSNVDKEEEAVTIEMNEPVQLTFALR	Unambiguous	4	2	NP_001081011.1;NP_001082364.1		CID	1	0	1	1	60.51	6.22441e-06	1	3.96416	0	3	1097.89	3291.64	0.0314067	96.1534	10846	10846	MS2	11/322	170307_chiba_PAF15_02.raw
	High	DLIDEACWDITSSGISLQSMDSSHVSLVQLTLR	Unambiguous	4	2	NP_001081011.1;NP_001082364.1		CID	1	0	1	1	60.35	1.13938e-05	0	25.9686	2	2	1810.39	3619.77	2.7004	133.049	15777	15777	MS2	9/346	170307_chiba_PAF15_02.raw
	High	VLEALKDLIDEACWDITSSGISLQSMDSSHVSLVQLTLR	Unambiguous	4	2	NP_001081011.1;NP_001082364.1		CID	1	0	1	1	60.28	5.01596e-06	1	26.7031	9	3	1425.07	4273.18	1.89983	144.093	17233	17233	MS2	25/438	170307_chiba_PAF15_02.raw
	High	LSQTSNVDKEEEAVTIEMNEPVQLTFALR	Unambiguous	4	2	NP_001081011.1;NP_001082364.1		CID	1	0	1	1	60.23	6.63893e-06	1	3.94863	2	3	1097.89	3291.64	0.142662	148.887	17813	17813	MS2	9/322	170307_chiba_PAF15_02.raw
	High	LSQTSNVDKEEEAVTIEMNEPVQLTFALR	Unambiguous	4	2	NP_001081011.1;NP_001082364.1		CID	1	0	1	1	59.94	8.0606e-06	1	2.07367	0	3	1097.89	3291.64	-0.302358	115.849	13492	13492	MS2	30/322	170307_chiba_PAF15_02.raw
	High	LSQTSNVDKEEEAVTIEMNEPVQLTFALR	Unambiguous	4	2	NP_001081011.1;NP_001082364.1		CID	1	0	1	1	59.81	7.31304e-06	1	4.90703	0	3	1097.89	3291.64	0.253916	100.015	11371	11371	MS2	12/322	170307_chiba_PAF15_02.raw
	High	LMDLDVEQLGIPEQEYSCVIK	Unambiguous	4	2	NP_001081011.1;NP_001082364.1		CID	1	0	1	1	59.76	1.33687e-05	0	10.2134	61	2	1211.6	2422.19	0.561238	152.058	18164	18164	MS2	18/214	170307_chiba_PAF15_02.raw
	High	LMDLDVEQLGIPEQEYSCVIK	Unambiguous	4	2	NP_001081011.1;NP_001082364.1		CID	1	0	1	1	59.75	1.52003e-05	0	34.4727	3	2	1211.6	2422.19	0.0572708	123.142	14461	14461	MS2	8/214	170307_chiba_PAF15_02.raw
	High	LMDLDVEQLGIPEQEYSCVIK	Unambiguous	4	2	NP_001081011.1;NP_001082364.1		CID	1	0	1	1	59.69	1.54117e-05	0	24.177	0	2	1211.6	2422.19	-0.849871	100.491	11434	11434	MS2	8/214	170307_chiba_PAF15_02.raw
	High	LMDLDVEQLGIPEQEYSCVIK	Unambiguous	4	2	NP_001081011.1;NP_001082364.1		CID	1	0	1	1	59.67	1.47276e-05	0	39.2958	1	2	1211.6	2422.19	-0.950664	113.566	13187	13187	MS2	8/214	170307_chiba_PAF15_02.raw
	High	LSQTSNVDKEEEAVTIEMNEPVQLTFALR	Unambiguous	4	2	NP_001081011.1;NP_001082364.1		CID	1	0	1	1	59.59	8.13264e-06	1	3.86713	0	3	1097.88	3291.64	-0.524868	97.6864	11056	11056	MS2	20/322	170307_chiba_PAF15_02.raw
	High	LMDLDVEQLGIPEQEYSCVIK	Unambiguous	4	2	NP_001081011.1;NP_001082364.1		CID	1	0	1	1	59.3	1.4745e-05	0	8.07574	13	2	1211.6	2422.19	0.460444	150.558	17991	17991	MS2	14/214	170307_chiba_PAF15_02.raw
	High	LSQTSNVDKEEEAVTIEMNEPVQLTFALR	Unambiguous	4	2	NP_001081011.1;NP_001082364.1		CID	1	0	1	1	59.23	8.35792e-06	1	4.35491	0	3	1097.89	3291.64	0.142662	107.019	12316	12316	MS2	21/322	170307_chiba_PAF15_02.raw
	High	LSQTSNVDKEEEAVTIEMNEPVQLTFALR	Unambiguous	4	2	NP_001081011.1;NP_001082364.1		CID	1	0	1	1	59.16	8.49372e-06	1	5.34316	0	3	1097.89	3291.64	0.253916	139.308	16601	16601	MS2	9/322	170307_chiba_PAF15_02.raw
	High	LMDLDVEQLGIPEQEYSCVIK	Unambiguous	4	2	NP_001081011.1;NP_001082364.1		CID	1	0	1	1	59.07	1.77767e-05	0	2.48821	0	2	1211.6	2422.19	0.0572708	96.9239	10952	10952	MS2	25/214	170307_chiba_PAF15_02.raw
	High	ATPLSPTVILSMSADIPLVVEYK	Unambiguous	3	2	NP_001081011.1;NP_001082364.1		CID	1	0	1	1	59.03	9.62699e-06	0	7.95959	30	2	1222.67	2444.34	1.07809	153.336	18305	18305	MS2	14/214	170307_chiba_PAF15_02.raw
	High	AEDNADTVTMVFESPNQEK	Unambiguous	4	2	NP_001081011.1;NP_001082364.1		CID	1	0	1	1	59.01	5.27533e-06	0	3.89989	0	3	708.985	2124.94	0.263105	69.823	7172	7172	MS2	15/206	170307_chiba_PAF15_02.raw
	High	LSQTSNVDKEEEAVTIEMNEPVQLTFALR	Unambiguous	4	2	NP_001081011.1;NP_001082364.1		CID	1	0	1	1	58.95	9.36025e-06	1	7.47081	73	3	1097.89	3291.64	0.58768	153.862	18362	18362	MS2	9/322	170307_chiba_PAF15_02.raw
	High	LMDLDVEQLGIPEQEYSCVIK	Unambiguous	4	2	NP_001081011.1;NP_001082364.1		CID	1	0	1	1	58.92	1.8722e-05	0	3.154	0	2	1211.6	2422.19	-0.648284	94.5935	10637	10637	MS2	14/214	170307_chiba_PAF15_02.raw
	High	FSASGELGTGNVK	Unambiguous	4	2	NP_001081011.1;NP_001082364.1		CID	1	0	1	1	58.85	1.71366e-05	0	48.6246	0	2	633.819	1266.63	-1.17813	91.8273	10263	10263	MS2	11/114	170307_chiba_PAF15_02.raw
	High	SDGFDTYR	Unambiguous	4	2	NP_001081011.1;NP_001082364.1		CID	1	0	1	1	58.59	2.21371e-06	0	9.65871	0	2	480.706	960.405	-0.987651	46.0747	3625	3625	MS2	7/66	170307_chiba_PAF15_02.raw
	High	AEDNADTVTMVFESPNQEK	Unambiguous	4	2	NP_001081011.1;NP_001082364.1		CID	1	0	1	1	58.45	6.64436e-06	0	1.99099	0	3	708.985	2124.94	0.00459609	69.073	7068	7068	MS2	18/206	170307_chiba_PAF15_02.raw
	High	DLIDEACWDITSSGISLQSMDSSHVSLVQLTLR	Unambiguous	4	2	NP_001081011.1;NP_001082364.1		CID	1	0	1	1	58.38	1.48115e-05	0	4.91459	0	3	1207.26	3619.76	0.555258	141.536	16894	16894	MS2	22/346	170307_chiba_PAF15_02.raw
	High	LMDLDVEQLGIPEQEYSCVIK	Unambiguous	4	2	NP_001081011.1;NP_001082364.1		CID	1	0	1	1	58.3	2.16689e-05	0	6.47263	0	2	1211.6	2422.19	-0.446697	93.8018	10531	10531	MS2	12/214	170307_chiba_PAF15_02.raw
	High	LSQTSNVDKEEEAVTIEMNEPVQLTFALR	Unambiguous	4	2	NP_001081011.1;NP_001082364.1		CID	1	0	1	1	58.16	1.0693e-05	1	3.39649	0	3	1097.89	3291.64	0.142662	107.824	12422	12422	MS2	12/322	170307_chiba_PAF15_02.raw
	High	LSQTSNVDKEEEAVTIEMNEPVQLTFALR	Unambiguous	4	2	NP_001081011.1;NP_001082364.1		CID	1	0	1	1	58.04	1.09925e-05	1	6.5922	0	3	1097.89	3291.64	0.142662	136.912	16286	16286	MS2	9/322	170307_chiba_PAF15_02.raw
	High	DLSQIGDAVVISCAK	Unambiguous	4	2	NP_001081011.1;NP_001082364.1		CID	1	0	1	1	57.93	2.60119e-05	0	52.8097	2	2	759.896	1518.78	1.01156	142.426	17012	17012	MS2	15/156	170307_chiba_PAF15_02.raw
	High	LSQTSNVDKEEEAVTIEMNEPVQLTFALR	Unambiguous	4	2	NP_001081011.1;NP_001082364.1		CID	1	0	1	1	57.89	1.30044e-05	1	37.8865	0	2	1646.33	3291.64	0.869902	97.7594	11066	11066	MS2	12/322	170307_chiba_PAF15_02.raw
	High	LSQTSNVDKEEEAVTIEMNEPVQLTFALR	Unambiguous	4	2	NP_001081011.1;NP_001082364.1		CID	1	0	1	1	57.63	1.20809e-05	1	9.19753	14	3	1097.89	3291.64	0.253916	153.244	18297	18297	MS2	11/322	170307_chiba_PAF15_02.raw
	High	AEDNADTVTMVFESPNQEK	Unambiguous	4	2	NP_001081011.1;NP_001082364.1		CID	1	0	1	1	57.56	6.92783e-06	0	2.35545	0	3	708.984	2124.94	-0.943272	66.0021	6625	6625	MS2	15/206	170307_chiba_PAF15_02.raw
	High	DLSQIGDAVVISCAK	Unambiguous	4	2	NP_001081011.1;NP_001082364.1		CID	1	0	1	1	57.32	2.89151e-05	0	3.30008	0	3	506.932	1518.78	-1.08701	84.9516	9313	9313	MS2	17/156	170307_chiba_PAF15_02.raw
	High	AEDNADTVTMVFESPNQEK	Unambiguous	4	2	NP_001081011.1;NP_001082364.1		CID	1	0	1	1	57.18	8.997e-06	0	21.0581	0	3	708.984	2124.94	-0.426253	67.7669	6883	6883	MS2	17/206	170307_chiba_PAF15_02.raw
	High	LMDLDVEQLGIPEQEYSCVIK	Unambiguous	4	2	NP_001081011.1;NP_001082364.1		CID	1	0	1	1	57.1	2.74928e-05	0	46.9774	4	2	1211.6	2422.19	0.258858	137.473	16359	16359	MS2	8/214	170307_chiba_PAF15_02.raw
	High	LSQTSNVDKEEEAVTIEMNEPVQLTFALR	Unambiguous	4	2	NP_001081011.1;NP_001082364.1		CID	1	0	1	1	56.88	1.63067e-05	1	4.41678	0	3	1097.89	3291.64	-0.302358	94.5861	10636	10636	MS2	9/322	170307_chiba_PAF15_02.raw
	High	LMDLDVEQLGIPEQEYSCVIK	Unambiguous	4	2	NP_001081011.1;NP_001082364.1		CID	1	0	1	1	56.72	2.99004e-05	0	42.3643	2	2	1211.6	2422.19	0.359651	122.766	14411	14411	MS2	11/214	170307_chiba_PAF15_02.raw
	High	LMDLDVEQLGIPEQEYSCVIK	Unambiguous	4	2	NP_001081011.1;NP_001082364.1		CID	1	0	1	1	56.64	3.17569e-05	0	8.8571	0	2	1211.6	2422.19	-0.446697	92.2537	10321	10321	MS2	8/214	170307_chiba_PAF15_02.raw
	High	LSQTSNVDKEEEAVTIEMNEPVQLTFALR	Unambiguous	4	2	NP_001081011.1;NP_001082364.1		CID	1	0	1	1	56.63	1.59694e-05	1	5.492	4	3	1097.89	3291.64	0.58768	151.381	18085	18085	MS2	12/322	170307_chiba_PAF15_02.raw
	High	LSQTSNVDKEEEAVTIEMNEPVQLTFALR	Unambiguous	4	2	NP_001081011.1;NP_001082364.1		CID	1	0	1	1	56.55	1.78154e-05	1	4.44249	0	3	1097.89	3291.64	-0.0798481	110.504	12780	12780	MS2	9/322	170307_chiba_PAF15_02.raw
	High	AEDNADTVTMVFESPNQEK	Unambiguous	4	2	NP_001081011.1;NP_001082364.1		CID	1	0	1	1	56.54	9.42733e-06	0	3.28425	0	3	708.984	2124.94	-0.684762	64.2362	6373	6373	MS2	11/206	170307_chiba_PAF15_02.raw
	High	DLSQIGDAVVISCAK	Unambiguous	4	2	NP_001081011.1;NP_001082364.1		CID	1	0	1	1	56.52	3.59892e-05	0	34.1103	8	3	506.933	1518.79	1.14336	145.756	17445	17445	MS2	10/156	170307_chiba_PAF15_02.raw
	High	AEDNADTVTMVFESPNQEK	Unambiguous	4	2	NP_001081011.1;NP_001082364.1		CID	1	0	1	1	56.45	1.18894e-05	0	42.6917	25	2	1062.97	2124.94	1.67687	146.418	17525	17525	MS2	14/206	170307_chiba_PAF15_02.raw
	High	VLEALKDLIDEACWDITSSGISLQSMDSSHVSLVQLTLR	Unambiguous	4	2	NP_001081011.1;NP_001082364.1		CID	1	0	1	1	56.43	1.14892e-05	1	13.9029	1	3	1425.06	4273.18	1.29993	143.606	17168	17168	MS2	25/438	170307_chiba_PAF15_02.raw
	High	LSQTSNVDKEEEAVTIEMNEPVQLTFALR	Unambiguous	4	2	NP_001081011.1;NP_001082364.1		CID	1	0	1	1	56.41	1.67992e-05	1	13.3508	0	3	1097.89	3291.64	0.58768	143.116	17102	17102	MS2	11/322	170307_chiba_PAF15_02.raw
	High	DLSQIGDAVVISCAK	Unambiguous	4	2	NP_001081011.1;NP_001082364.1		CID	1	0	1	1	56.39	3.70828e-05	0	16.3839	17	3	506.933	1518.78	0.962517	148.15	17736	17736	MS2	7/156	170307_chiba_PAF15_02.raw
	High	LSQTSNVDKEEEAVTIEMNEPVQLTFALR	Unambiguous	4	2	NP_001081011.1;NP_001082364.1		CID	1	0	1	1	56.39	1.82544e-05	1	4.71272	0	3	1097.89	3291.64	-0.191103	88.1627	9754	9754	MS2	9/322	170307_chiba_PAF15_02.raw
	High	LMDLDVEQLGIPEQEYSCVIK	Unambiguous	4	2	NP_001081011.1;NP_001082364.1		CID	1	0	1	1	56.35	3.07055e-05	0	66.5254	4	2	1211.6	2422.19	1.36758	142.197	16982	16982	MS2	8/214	170307_chiba_PAF15_02.raw
	High	LSQTSNVDKEEEAVTIEMNEPVQLTFALR	Unambiguous	4	2	NP_001081011.1;NP_001082364.1		CID	1	0	1	1	56.3	1.86366e-05	1	3.10932	0	3	1097.89	3291.64	-0.191103	105.454	12106	12106	MS2	11/322	170307_chiba_PAF15_02.raw
	High	ATPLSPTVILSMSADIPLVVEYK	Unambiguous	3	2	NP_001081011.1;NP_001082364.1		CID	1	0	1	1	56.29	1.76222e-05	0	4.52545	0	3	815.45	2444.34	-0.0510664	127.383	15025	15025	MS2	17/214	170307_chiba_PAF15_02.raw
	High	LSQTSNVDKEEEAVTIEMNEPVQLTFALR	Unambiguous	4	2	NP_001081011.1;NP_001082364.1		CID	1	0	1	1	56.25	1.88524e-05	1	4.78575	0	3	1097.89	3291.64	-0.191103	103.906	11896	11896	MS2	9/322	170307_chiba_PAF15_02.raw
	High	LMDLDVEQLGIPEQEYSCVIK	Unambiguous	4	2	NP_001081011.1;NP_001082364.1		CID	1	0	1	1	56.24	3.47019e-05	0	54.1101	8	2	1211.6	2422.19	-0.749077	145.426	17404	17404	MS2	8/214	170307_chiba_PAF15_02.raw
	High	LSQTSNVDKEEEAVTIEMNEPVQLTFALR	Unambiguous	4	2	NP_001081011.1;NP_001082364.1		CID	1	0	1	1	56.15	1.69863e-05	1	2.52809	0	3	1097.89	3291.64	0.142662	117.431	13702	13702	MS2	9/322	170307_chiba_PAF15_02.raw
	High	DLIDEACWDITSSGISLQSMDSSHVSLVQLTLR	Unambiguous	4	2	NP_001081011.1;NP_001082364.1		CID	1	0	1	1	56.03	2.61932e-05	0	17.9319	1	2	1810.38	3619.76	-0.806821	121.993	14308	14308	MS2	9/346	170307_chiba_PAF15_02.raw
	High	LSQTSNVDKEEEAVTIEMNEPVQLTFALR	Unambiguous	4	2	NP_001081011.1;NP_001082364.1		CID	1	0	1	1	55.62	1.9191e-05	1	3.54986	0	3	1097.89	3291.64	0.142662	93.0391	10428	10428	MS2	9/322	170307_chiba_PAF15_02.raw
	High	AEDNADTVTMVFESPNQEK	Unambiguous	4	2	NP_001081011.1;NP_001082364.1		CID	1	0	1	1	55.58	1.23129e-05	0	12.0093	0	3	708.985	2124.94	0.693954	70.5901	7279	7279	MS2	16/206	170307_chiba_PAF15_02.raw
	High	DLSQIGDAVVISCAK	Unambiguous	4	2	NP_001081011.1;NP_001082364.1		CID	1	0	1	1	55.5	4.3544e-05	0	41.1295	0	2	759.895	1518.78	-0.113674	90.742	10113	10113	MS2	12/156	170307_chiba_PAF15_02.raw
	High	DLIDEACWDITSSGISLQSMDSSHVSLVQLTLR	Unambiguous	4	2	NP_001081011.1;NP_001082364.1		CID	1	0	1	1	55.49	2.92375e-05	0	7.68077	2	3	1207.26	3619.77	2.0728	146.217	17499	17499	MS2	32/346	170307_chiba_PAF15_02.raw
	High	DLIDEACWDITSSGISLQSMDSSHVSLVQLTLR	Unambiguous	4	2	NP_001081011.1;NP_001082364.1		CID	1	0	1	1	55.45	3.09335e-05	0	2.73793	0	3	1207.26	3619.76	-0.355271	120.92	14165	14165	MS2	26/346	170307_chiba_PAF15_02.raw
	High	LMDLDVEQLGIPEQEYSCVIK	Unambiguous	4	2	NP_001081011.1;NP_001082364.1		CID	1	0	1	1	55.34	4.25464e-05	0	36.7406	2	2	1211.6	2422.19	-0.144316	135.053	16041	16041	MS2	10/214	170307_chiba_PAF15_02.raw
	High	LSQTSNVDKEEEAVTIEMNEPVQLTFALR	Unambiguous	4	2	NP_001081011.1;NP_001082364.1		CID	1	0	1	1	55.04	2.44396e-05	1	3.34828	0	3	1097.88	3291.64	-0.413613	102.347	11686	11686	MS2	18/322	170307_chiba_PAF15_02.raw
	High	LSQTSNVDKEEEAVTIEMNEPVQLTFALR	Unambiguous	4	2	NP_001081011.1;NP_001082364.1		CID	1	0	1	1	54.99	2.44057e-05	1	3.91482	0	3	1097.88	3291.64	-0.636123	104.68	12001	12001	MS2	12/322	170307_chiba_PAF15_02.raw
	High	DLIDEACWDITSSGISLQSMDSSHVSLVQLTLR	Unambiguous	4	2	NP_001081011.1;NP_001082364.1		CID	1	0	1	1	54.98	3.27218e-05	0	7.52884	0	3	1207.26	3619.76	0.454088	139.953	16686	16686	MS2	24/346	170307_chiba_PAF15_02.raw
	High	LMDLDVEQLGIPEQEYSCVIK	Unambiguous	4	2	NP_001081011.1;NP_001082364.1		CID	1	0	1	1	54.96	4.64369e-05	0	5.80751	0	2	1211.6	2422.19	-0.144316	97.6938	11057	11057	MS2	14/214	170307_chiba_PAF15_02.raw
	High	DLIDEACWDITSSGISLQSMDSSHVSLVQLTLR	Unambiguous	4	2	NP_001081011.1;NP_001082364.1		CID	1	0	1	1	54.83	3.5516e-05	0	3.55508	0	3	1207.26	3619.76	-0.658781	135.473	16096	16096	MS2	26/346	170307_chiba_PAF15_02.raw
	High	LSQTSNVDKEEEAVTIEMNEPVQLTFALR	Unambiguous	4	2	NP_001081011.1;NP_001082364.1		CID	1	0	1	1	54.33	2.58284e-05	1	5.67886	0	3	1097.89	3291.64	0.0314067	100.797	11476	11476	MS2	8/322	170307_chiba_PAF15_02.raw
	High	LMDLDVEQLGIPEQEYSCVIK	Unambiguous	4	2	NP_001081011.1;NP_001082364.1		CID	1	0	1	1	54.27	5.46201e-05	0	34.8008	2	2	1211.6	2422.19	-0.648284	122.062	14317	14317	MS2	12/214	170307_chiba_PAF15_02.raw
	High	AEDNADTVTMVFESPNQEK	Unambiguous	4	2	NP_001081011.1;NP_001082364.1		CID	1	0	1	1	54.01	1.8668e-05	0	19.7191	2	2	1062.97	2124.94	-0.391202	92.5324	10360	10360	MS2	18/206	170307_chiba_PAF15_02.raw
	High	DLIDEACWDITSSGISLQSMDSSHVSLVQLTLR	Unambiguous	4	2	NP_001081011.1;NP_001082364.1		CID	1	0	1	1	53.85	4.43005e-05	0	5.38713	0	3	1207.26	3619.76	0.150579	126.914	14962	14962	MS2	29/346	170307_chiba_PAF15_02.raw
	High	DLIDEACWDITSSGISLQSMDSSHVSLVQLTLR	Unambiguous	4	2	NP_001081011.1;NP_001082364.1		CID	1	0	1	1	53.72	4.62835e-05	0	6.89016	12	3	1207.26	3619.76	0.251749	151.082	18053	18053	MS2	24/346	170307_chiba_PAF15_02.raw
	High	IADMGHVK	Unambiguous	2	2	NP_001081011.1;NP_001082364.1		CID	1	0	1	1	53.66	6.544e-05	0	6.33394	0	2	435.728	870.449	-1.13154	41.55	2908	2908	MS2	7/56	170307_chiba_PAF15_02.raw
	High	LSQTSNVDKEEEAVTIEMNEPVQLTFALR	Unambiguous	4	2	NP_001081011.1;NP_001082364.1		CID	1	0	1	1	53.63	3.20798e-05	1	5.92675	0	3	1097.88	3291.64	-0.524868	95.3759	10741	10741	MS2	8/322	170307_chiba_PAF15_02.raw
	High	LSQTSNVDKEEEAVTIEMNEPVQLTFALR	Unambiguous	4	2	NP_001081011.1;NP_001082364.1		CID	1	0	1	1	53.62	3.45436e-05	1	5.38169	0	3	1097.89	3291.64	-0.191103	127.7	15068	15068	MS2	8/322	170307_chiba_PAF15_02.raw
	High	LMDLDVEQLGIPEQEYSCVIK	Unambiguous	4	2	NP_001081011.1;NP_001082364.1		CID	1	0	1	1	53.45	6.64228e-05	0	21.1742	31	2	1211.6	2422.19	0.158064	151.424	18091	18091	MS2	11/214	170307_chiba_PAF15_02.raw
	High	LSQTSNVDKEEEAVTIEMNEPVQLTFALR	Unambiguous	4	2	NP_001081011.1;NP_001082364.1		CID	1	0	1	1	53.41	4.24114e-05	1	66.2523	3	2	1646.33	3291.65	2.05662	111.217	12875	12875	MS2	24/322	170307_chiba_PAF15_02.raw
	High	LSQTSNVDKEEEAVTIEMNEPVQLTFALR	Unambiguous	4	2	NP_001081011.1;NP_001082364.1		CID	1	0	1	1	53.38	3.58174e-05	1	4.14981	0	3	1097.88	3291.64	-0.413613	103.128	11791	11791	MS2	8/322	170307_chiba_PAF15_02.raw
	High	ATPLSPTVILSMSADIPLVVEYK	Unambiguous	3	2	NP_001081011.1;NP_001082364.1		CID	1	0	1	1	53.32	3.58501e-05	0	3.12415	1	3	815.451	2444.34	0.997674	147.406	17645	17645	MS2	9/214	170307_chiba_PAF15_02.raw
	High	LMDLDVEQLGIPEQEYSCVIK	Unambiguous	4	2	NP_001081011.1;NP_001082364.1		CID	1	0	1	1	53.27	6.89982e-05	0	47.5313	1	2	1211.6	2422.19	-0.446697	102.713	11735	11735	MS2	16/214	170307_chiba_PAF15_02.raw
	High	LMDLDVEQLGIPEQEYSCVIK	Unambiguous	4	2	NP_001081011.1;NP_001082364.1		CID	1	0	1	1	53.25	6.38754e-05	0	21.2124	3	2	1211.6	2422.19	1.0652	138.538	16500	16500	MS2	9/214	170307_chiba_PAF15_02.raw
	High	LMDLDVEQLGIPEQEYSCVIK	Unambiguous	4	2	NP_001081011.1;NP_001082364.1		CID	1	0	1	1	53.07	7.07704e-05	0	15.7315	2	2	1211.6	2422.19	-0.0435226	125.451	14766	14766	MS2	8/214	170307_chiba_PAF15_02.raw
	High	LMDLDVEQLGIPEQEYSCVIK	Unambiguous	4	2	NP_001081011.1;NP_001082364.1		CID	1	0	1	1	52.99	7.20862e-05	0	28.265	1	2	1211.6	2422.19	-0.0435226	107.523	12383	12383	MS2	12/214	170307_chiba_PAF15_02.raw
	High	DLIDEACWDITSSGISLQSMDSSHVSLVQLTLR	Unambiguous	4	2	NP_001081011.1;NP_001082364.1		CID	1	0	1	1	52.96	5.61465e-05	0	37.5008	2	2	1810.38	3619.76	-0.537034	125.794	14812	14812	MS2	9/346	170307_chiba_PAF15_02.raw
	High	LVQGSILK	Unambiguous	4	2	NP_001081011.1;NP_001082364.1		CID	1	0	1	1	52.73	0.0001064	0	9.35018	3	2	429.276	857.545	-0.928193	118.992	13910	13910	MS2	7/66	170307_chiba_PAF15_02.raw
	High	LMDLDVEQLGIPEQEYSCVIK	Unambiguous	4	2	NP_001081011.1;NP_001082364.1		CID	1	0	1	1	52.69	7.778e-05	0	39.5154	1	2	1211.6	2422.19	-0.54749	108.368	12495	12495	MS2	8/214	170307_chiba_PAF15_02.raw
	High	LVQGSILK	Unambiguous	4	2	NP_001081011.1;NP_001082364.1		CID	0.4528	0	1	1	52.57	0.000105137	0	3.11568	3	2	429.276	857.545	-0.074101	143.628	17171	17171	MS2	6/66	170307_chiba_PAF15_02.raw
	High	LMDLDVEQLGIPEQEYSCVIK	Unambiguous	4	2	NP_001081011.1;NP_001082364.1		CID	1	0	1	1	52.54	7.91204e-05	0	61.9813	2	2	1211.6	2422.18	-1.45463	143.797	17194	17194	MS2	11/214	170307_chiba_PAF15_02.raw
	High	DLSQIGDAVVISCAK	Unambiguous	4	2	NP_001081011.1;NP_001082364.1		CID	1	0	1	1	52.26	0.000108755	0	18.3732	24	3	506.933	1518.78	0.480275	149.829	17913	17913	MS2	12/156	170307_chiba_PAF15_02.raw
	High	LSQTSNVDKEEEAVTIEMNEPVQLTFALR	Unambiguous	4	2	NP_001081011.1;NP_001082364.1		CID	1	0	1	1	52.19	4.25784e-05	1	13.8501	0	3	1097.89	3291.64	0.365171	140.91	16812	16812	MS2	9/322	170307_chiba_PAF15_02.raw
	High	LMDLDVEQLGIPEQEYSCVIK	Unambiguous	4	2	NP_001081011.1;NP_001082364.1		CID	1	0	1	1	52.18	8.2629e-05	0	16.5836	0	3	808.067	2422.19	-1.05701	101.799	11611	11611	MS2	19/214	170307_chiba_PAF15_02.raw
	High	KVLEALK	Unambiguous	4	2	NP_001081011.1;NP_001082364.1		CID	0.4615	0	1	1	52.15	0.000146289	1	6.45654	0	2	400.765	800.523	-1.48222	42.8687	3118	3118	MS2	6/60	170307_chiba_PAF15_02.raw
	High	ATPLSPTVILSMSADIPLVVEYK	Unambiguous	3	2	NP_001081011.1;NP_001082364.1		CID	1	0	1	1	51.84	4.90977e-05	0	3.00516	0	3	815.45	2444.34	0.0238437	125.028	14710	14710	MS2	19/214	170307_chiba_PAF15_02.raw
	High	ATPLSPTVILSMSADIPLVVEYK	Unambiguous	3	2	NP_001081011.1;NP_001082364.1		CID	1	0	1	1	51.75	5.14625e-05	0	4.64865	0	3	815.451	2444.34	0.997674	117.113	13660	13660	MS2	18/214	170307_chiba_PAF15_02.raw
	High	LMDLDVEQLGIPEQEYSCVIK	Unambiguous	4	2	NP_001081011.1;NP_001082364.1		CID	1	0	1	1	51.71	9.88184e-05	0	24.832	1	2	1211.6	2422.19	-0.345903	126.987	14972	14972	MS2	11/214	170307_chiba_PAF15_02.raw
	High	DLIDEACWDITSSGISLQSMDSSHVSLVQLTLR	Unambiguous	4	2	NP_001081011.1;NP_001082364.1		CID	1	0	1	1	51.7	7.50452e-05	0	35.569	6	2	1810.39	3619.77	2.29572	141.035	16829	16829	MS2	9/346	170307_chiba_PAF15_02.raw
	High	DLIDEACWDITSSGISLQSMDSSHVSLVQLTLR	Unambiguous	4	2	NP_001081011.1;NP_001082364.1		CID	1	0	1	1	51.66	7.30102e-05	0	5.37212	0	3	1207.26	3619.76	-0.051761	124.708	14668	14668	MS2	29/346	170307_chiba_PAF15_02.raw
	High	DLIDEACWDITSSGISLQSMDSSHVSLVQLTLR	Unambiguous	4	2	NP_001081011.1;NP_001082364.1		CID	1	0	1	1	51.52	7.2231e-05	0	3.58214	4	3	1207.26	3619.76	0.656428	148.106	17730	17730	MS2	22/346	170307_chiba_PAF15_02.raw
	High	DLSQIGDAVVISCAK	Unambiguous	4	2	NP_001081011.1;NP_001082364.1		CID	1	0	1	1	51.48	0.000130152	0	18.7597	18	3	506.933	1518.78	0.480275	148.979	17825	17825	MS2	11/156	170307_chiba_PAF15_02.raw
	High	AEDNADTVTMVFESPNQEK	Unambiguous	4	2	NP_001081011.1;NP_001082364.1		CID	1	0	1	1	51.48	3.3427e-05	0	7.30208	0	3	708.984	2124.94	-0.340083	71.8086	7447	7447	MS2	14/206	170307_chiba_PAF15_02.raw
	High	LSQTSNVDKEEEAVTIEMNEPVQLTFALR	Unambiguous	4	2	NP_001081011.1;NP_001082364.1		CID	1	0	1	1	51.13	5.43487e-05	1	3.33681	0	3	1097.89	3291.64	0.365171	115.085	13388	13388	MS2	9/322	170307_chiba_PAF15_02.raw
	High	LMDLDVEQLGIPEQEYSCVIK	Unambiguous	4	2	NP_001081011.1;NP_001082364.1		CID	1	0	1	1	51.03	0.000107679	0	28.9734	0	2	1211.6	2422.19	-1.15225	99.7304	11332	11332	MS2	10/214	170307_chiba_PAF15_02.raw
	High	AEDNADTVTMVFESPNQEK	Unambiguous	4	2	NP_001081011.1;NP_001082364.1		CID	1	0	1	1	51.02	3.08365e-05	0	8.5921	4	2	1062.97	2124.94	0.298156	95.3562	10739	10739	MS2	10/206	170307_chiba_PAF15_02.raw
	High	ATPLSPTVILSMSADIPLVVEYK	Unambiguous	3	2	NP_001081011.1;NP_001082364.1		CID	1	0	1	1	51	5.95746e-05	0	5.6184	0	3	815.45	2444.34	0.0238437	138.501	16495	16495	MS2	20/214	170307_chiba_PAF15_02.raw
	High	SDGFDTYR	Unambiguous	4	2	NP_001081011.1;NP_001082364.1		CID	1	0	1	1	50.9	1.38181e-05	0	3.16483	0	2	480.706	960.404	-1.68672	45.2508	3497	3497	MS2	6/66	170307_chiba_PAF15_02.raw
	High	ATPLSPTVILSMSADIPLVVEYK	Unambiguous	3	2	NP_001081011.1;NP_001082364.1		CID	1	0	1	1	50.9	6.01495e-05	0	18.9374	0	3	815.45	2444.34	-0.125977	110.189	12738	12738	MS2	8/214	170307_chiba_PAF15_02.raw
	High	LMDLDVEQLGIPEQEYSCVIK	Unambiguous	4	2	NP_001081011.1;NP_001082364.1		CID	1	0	1	1	50.85	0.000104014	0	52.0303	2	2	1211.6	2422.19	0.561238	114.573	13320	13320	MS2	8/214	170307_chiba_PAF15_02.raw
	High	DLIDEACWDITSSGISLQSMDSSHVSLVQLTLR	Unambiguous	4	2	NP_001081011.1;NP_001082364.1		CID	1	0	1	1	50.85	8.96244e-05	0	5.75541	0	3	1207.26	3619.76	0.251749	140.734	16789	16789	MS2	31/346	170307_chiba_PAF15_02.raw
	High	LMDLDVEQLGIPEQEYSCVIK	Unambiguous	4	2	NP_001081011.1;NP_001082364.1		CID	1	0	1	1	50.8	0.000112288	0	7.8477	4	3	808.068	2422.19	1.05965	145.865	17458	17458	MS2	20/214	170307_chiba_PAF15_02.raw
	High	ATPLSPTVILSMSADIPLVVEYK	Unambiguous	3	2	NP_001081011.1;NP_001082364.1		CID	1	0	1	1	50.59	6.72188e-05	0	2.98712	1	3	815.451	2444.34	0.922764	149.875	17918	17918	MS2	17/214	170307_chiba_PAF15_02.raw
	High	ATPLSPTVILSMSADIPLVVEYK	Unambiguous	3	2	NP_001081011.1;NP_001082364.1		CID	1	0	1	1	50.52	6.8311e-05	0	1.81358	0	3	815.451	2444.34	1.07258	145.681	17435	17435	MS2	16/214	170307_chiba_PAF15_02.raw
	High	LSQTSNVDKEEEAVTIEMNEPVQLTFALR	Unambiguous	4	2	NP_001081011.1;NP_001082364.1		CID	1	0	1	1	50.5	7.17457e-05	1	3.53919	0	3	1097.89	3291.64	-0.0798481	113.659	13199	13199	MS2	8/322	170307_chiba_PAF15_02.raw
	High	ATPLSPTVILSMSADIPLVVEYK	Unambiguous	3	2	NP_001081011.1;NP_001082364.1		CID	1	0	1	1	50.43	7.11e-05	0	4.33469	2	3	815.451	2444.34	0.698034	151.503	18100	18100	MS2	16/214	170307_chiba_PAF15_02.raw
	High	LMDLDVEQLGIPEQEYSCVIK	Unambiguous	4	2	NP_001081011.1;NP_001082364.1		CID	1	0	1	1	50.29	0.000136569	0	29.7976	2	2	1211.6	2422.19	-0.24511	132.337	15682	15682	MS2	13/214	170307_chiba_PAF15_02.raw
	High	ATPLSPTVILSMSADIPLVVEYK	Unambiguous	3	2	NP_001081011.1;NP_001082364.1		CID	1	0	1	1	50.24	7.38065e-05	0	2.33986	0	3	815.45	2444.34	0.398394	143.252	17120	17120	MS2	8/214	170307_chiba_PAF15_02.raw
	High	LVQGSILK	Unambiguous	4	2	NP_001081011.1;NP_001082364.1		CID	0.42	0	1	1	50.2	0.000181449	0	19.0774	18	2	429.276	857.546	-0.00292678	147.69	17680	17680	MS2	6/66	170307_chiba_PAF15_02.raw
	High	LSQTSNVDKEEEAVTIEMNEPVQLTFALR	Unambiguous	4	2	NP_001081011.1;NP_001082364.1		CID	1	0	1	1	50.18	6.7158e-05	1	9.50222	0	3	1097.89	3291.64	0.0314067	130.714	15466	15466	MS2	9/322	170307_chiba_PAF15_02.raw
	High	MPSGEFAR	Unambiguous	4	2	NP_001081011.1;NP_001082364.1		CID	1	0	1	1	50.01	5.38758e-05	0	31.8354	0	2	447.71	894.413	-1.16606	44.7058	3413	3413	MS2	6/60	170307_chiba_PAF15_02.raw
	High	MPSGEFAR	Unambiguous	4	2	NP_001081011.1;NP_001082364.1		CID	1	0	1	1	50	5.4e-05	0	0	2	2	447.71	894.413	-1.2343	110.907	12834	12834	MS2	7/60	170307_chiba_PAF15_02.raw
	High	LVQGSILK	Unambiguous	4	2	NP_001081011.1;NP_001082364.1		CID	1	0	1	1	49.9	0.000204147	0	0	3	2	429.276	857.545	-0.71467	126.588	14918	14918	MS2	7/66	170307_chiba_PAF15_02.raw
	High	LMDLDVEQLGIPEQEYSCVIK	Unambiguous	4	2	NP_001081011.1;NP_001082364.1		CID	1	0	1	1	49.87	0.00014786	0	45.7706	2	2	1211.6	2422.19	-0.0435226	141.402	16877	16877	MS2	8/214	170307_chiba_PAF15_02.raw
	High	LSQTSNVDKEEEAVTIEMNEPVQLTFALR	Unambiguous	4	2	NP_001081011.1;NP_001082364.1		CID	1	0	1	1	49.82	8.28642e-05	1	7.79022	0	3	1097.89	3291.64	-0.302358	133.099	15783	15783	MS2	8/322	170307_chiba_PAF15_02.raw
	High	MPSGEFAR	Unambiguous	4	2	NP_001081011.1;NP_001082364.1		CID	1	0	1	1	49.81	4.91019e-05	0	28.1088	4	2	447.71	894.413	-0.415415	139.749	16659	16659	MS2	7/60	170307_chiba_PAF15_02.raw
	High	LMDLDVEQLGIPEQEYSCVIK	Unambiguous	4	2	NP_001081011.1;NP_001082364.1		CID	1	0	1	1	49.7	0.00015537	0	12.8509	0	3	808.067	2422.19	-0.603438	91.5563	10225	10225	MS2	20/214	170307_chiba_PAF15_02.raw
	High	LSQTSNVDKEEEAVTIEMNEPVQLTFALR	Unambiguous	4	2	NP_001081011.1;NP_001082364.1		CID	1	0	1	1	49.66	8.00261e-05	1	3.25813	0	3	1097.88	3291.64	-0.524868	92.2687	10323	10323	MS2	8/322	170307_chiba_PAF15_02.raw
	High	LMDLDVEQLGIPEQEYSCVIK	Unambiguous	4	2	NP_001081011.1;NP_001082364.1		CID	1	0	1	1	49.6	0.000160086	0	16.9732	0	2	1211.6	2422.19	-0.749077	101.927	11628	11628	MS2	7/214	170307_chiba_PAF15_02.raw
	High	LMDLDVEQLGIPEQEYSCVIK	Unambiguous	4	2	NP_001081011.1;NP_001082364.1		CID	1	0	1	1	49.59	0.000158806	0	29.2665	3	2	1211.6	2422.19	-0.54749	131.888	15622	15622	MS2	22/214	170307_chiba_PAF15_02.raw
	High	LSQTSNVDKEEEAVTIEMNEPVQLTFALR	Unambiguous	4	2	NP_001081011.1;NP_001082364.1		CID	1	0	1	1	49.53	8.24578e-05	1	5.5455	0	3	1097.88	3291.64	-0.524868	112.859	13093	13093	MS2	15/322	170307_chiba_PAF15_02.raw
	High	LMDLDVEQLGIPEQEYSCVIK	Unambiguous	4	2	NP_001081011.1;NP_001082364.1		CID	1	0	1	1	49.5	0.000157644	0	30.2697	1	2	1211.6	2422.19	0.359651	121.104	14190	14190	MS2	8/214	170307_chiba_PAF15_02.raw
	High	LSQTSNVDKEEEAVTIEMNEPVQLTFALR	Unambiguous	4	2	NP_001081011.1;NP_001082364.1		CID	1	0	1	1	49.46	8.37976e-05	1	31.3965	0	2	1646.33	3291.65	1.09241	99.7787	11339	11339	MS2	18/322	170307_chiba_PAF15_02.raw
	High	ATPLSPTVILSMSADIPLVVEYK	Unambiguous	3	2	NP_001081011.1;NP_001082364.1		CID	1	0	1	1	49.17	8.95843e-05	0	3.36936	0	3	815.45	2444.33	-0.425617	121.067	14185	14185	MS2	19/214	170307_chiba_PAF15_02.raw
	High	LMDLDVEQLGIPEQEYSCVIK	Unambiguous	4	2	NP_001081011.1;NP_001082364.1		CID	1	0	1	1	49.03	0.000183163	0	4.53186	0	3	808.067	2422.19	-0.376653	92.2613	10322	10322	MS2	14/214	170307_chiba_PAF15_02.raw
	High	LSQTSNVDKEEEAVTIEMNEPVQLTFALR	Unambiguous	4	2	NP_001081011.1;NP_001082364.1		CID	1	0	1	1	49.03	8.75181e-05	1	9.7662	0	3	1097.89	3291.64	0.476426	141.705	16917	16917	MS2	8/322	170307_chiba_PAF15_02.raw
	High	LSQTSNVDKEEEAVTIEMNEPVQLTFALR	Unambiguous	4	2	NP_001081011.1;NP_001082364.1		CID	1	0	1	1	48.89	9.1031e-05	1	37.3419	0	2	1646.33	3291.65	1.46326	89.6781	9967	9967	MS2	24/322	170307_chiba_PAF15_02.raw
	High	LVQGSILK	Unambiguous	4	2	NP_001081011.1;NP_001082364.1		CID	1	0	1	1	48.84	0.000260581	0	31.0499	22	2	429.276	857.545	-0.857018	147.203	17621	17621	MS2	7/66	170307_chiba_PAF15_02.raw
	High	LVQGSILK	Unambiguous	4	2	NP_001081011.1;NP_001082364.1		CID	1	0	1	1	48.84	0.000248172	0	14.3866	3	2	429.276	857.546	-0.00292678	141.621	16906	16906	MS2	7/66	170307_chiba_PAF15_02.raw
	High	DLSQIGDAVVISCAK	Unambiguous	4	2	NP_001081011.1;NP_001082364.1		CID	1	0	1	1	48.71	0.0002113	0	38.3719	1	2	759.895	1518.78	-0.354796	117.624	13728	13728	MS2	10/156	170307_chiba_PAF15_02.raw
	High	VSDYEMK	Unambiguous	4	2	NP_001081011.1;NP_001082364.1		CID	1	0	1	1	48.66	5.44578e-05	0	20.4897	0	2	436.197	871.386	-0.895675	42.4836	3056	3056	MS2	5/54	170307_chiba_PAF15_02.raw
	High	LMDLDVEQLGIPEQEYSCVIK	Unambiguous	4	2	NP_001081011.1;NP_001082364.1		CID	1	0	1	1	48.59	0.000198542	0	21.8985	2	2	1211.6	2422.19	0.0572708	140.011	16694	16694	MS2	11/214	170307_chiba_PAF15_02.raw
	High	LMDLDVEQLGIPEQEYSCVIK	Unambiguous	4	2	NP_001081011.1;NP_001082364.1		CID	1	0	1	1	48.53	0.000201304	0	8.20614	0	2	1211.6	2422.19	0.0572708	93.0241	10426	10426	MS2	21/214	170307_chiba_PAF15_02.raw
	High	ATPLSPTVILSMSADIPLVVEYK	Unambiguous	3	2	NP_001081011.1;NP_001082364.1		CID	1	0	1	1	48.5	0.000104528	0	4.33969	0	3	815.45	2444.34	-0.125977	114.768	13346	13346	MS2	10/214	170307_chiba_PAF15_02.raw
	High	LMDLDVEQLGIPEQEYSCVIK	Unambiguous	4	2	NP_001081011.1;NP_001082364.1		CID	1	0	1	1	48.42	0.000210065	0	1.87129	0	3	808.067	2422.19	-0.830224	95.3983	10744	10744	MS2	15/214	170307_chiba_PAF15_02.raw
	High	LMDLDVEQLGIPEQEYSCVIK	Unambiguous	4	2	NP_001081011.1;NP_001082364.1		CID	1	0	1	1	48.4	0.000211757	0	62.026	2	2	1211.6	2422.19	-0.345903	121.772	14279	14279	MS2	12/214	170307_chiba_PAF15_02.raw
	High	MPSGEFAR	Unambiguous	4	2	NP_001081011.1;NP_001082364.1		CID	1	0	1	1	48.37	7.85948e-05	0	0	2	2	447.71	894.413	-1.50726	119.775	14014	14014	MS2	7/60	170307_chiba_PAF15_02.raw
	High	LMDLDVEQLGIPEQEYSCVIK	Unambiguous	4	2	NP_001081011.1;NP_001082364.1		CID	1	0	1	1	48.33	0.000206384	0	3.00686	0	3	808.068	2422.19	0.379298	93.0318	10427	10427	MS2	16/214	170307_chiba_PAF15_02.raw
	High	LVQGSILK	Unambiguous	4	2	NP_001081011.1;NP_001082364.1		CID	1	0	1	1	48.32	0.000286365	0	48.0127	2	2	429.276	857.544	-1.71111	125.911	14828	14828	MS2	6/66	170307_chiba_PAF15_02.raw
	High	LVQGSILK	Unambiguous	4	2	NP_001081011.1;NP_001082364.1		CID	1	0	1	1	48.09	0.000309701	0	33.3557	3	2	429.276	857.544	-1.42641	126.106	14854	14854	MS2	6/66	170307_chiba_PAF15_02.raw
	High	LVQGSILK	Unambiguous	4	2	NP_001081011.1;NP_001082364.1		CID	1	0	1	1	48.01	0.000307553	0	11.5886	3	2	429.275	857.544	-2.13816	122.425	14366	14366	MS2	6/66	170307_chiba_PAF15_02.raw
	High	DLIDEACWDITSSGISLQSMDSSHVSLVQLTLR	Unambiguous	4	2	NP_001081011.1;NP_001082364.1		CID	1	0	1	1	47.77	0.000175465	0	7.88086	4	2	1810.39	3619.77	1.75615	130.34	15417	15417	MS2	9/346	170307_chiba_PAF15_02.raw
	High	LSQTSNVDK	Unambiguous	4	2	NP_001081011.1;NP_001082364.1		CID	1	0	1	1	47.62	0.000275041	0	18.0919	0	2	496.256	991.505	-0.329548	40.6702	2771	2771	MS2	6/88	170307_chiba_PAF15_02.raw
	High	ATPLSPTVILSMSADIPLVVEYK	Unambiguous	3	2	NP_001081011.1;NP_001082364.1		CID	1	0	1	1	47.61	0.000128301	0	4.03636	0	3	815.45	2444.34	-0.200887	120.275	14080	14080	MS2	18/214	170307_chiba_PAF15_02.raw
	High	ATPLSPTVILSMSADIPLVVEYK	Unambiguous	3	2	NP_001081011.1;NP_001082364.1		CID	1	0	1	1	47.54	0.000130386	0	4.05995	0	3	815.45	2444.33	-0.425617	132.925	15760	15760	MS2	7/214	170307_chiba_PAF15_02.raw
	High	LSQTSNVDKEEEAVTIEMNEPVQLTFALR	Unambiguous	4	2	NP_001081011.1;NP_001082364.1		CID	1	0	1	1	47.35	0.000129774	1	37.9684	2	2	1646.33	3291.65	1.53743	106.04	12185	12185	MS2	23/322	170307_chiba_PAF15_02.raw
	High	LMDLDVEQLGIPEQEYSCVIK	Unambiguous	4	2	NP_001081011.1;NP_001082364.1		CID	1	0	1	1	47.18	0.000262253	0	24.7647	4	2	1211.6	2422.19	0.762824	117.215	13674	13674	MS2	11/214	170307_chiba_PAF15_02.raw
	High	LSQTSNVDKEEEAVTIEMNEPVQLTFALR	Unambiguous	4	2	NP_001081011.1;NP_001082364.1		CID	1	0	1	1	47.12	0.0001543	1	7.29189	0	3	1097.89	3291.64	-0.191103	129.119	15256	15256	MS2	11/322	170307_chiba_PAF15_02.raw
	High	AEDNADTVTMVFESPNQEK	Unambiguous	4	2	NP_001081011.1;NP_001082364.1		CID	1	0	1	1	47.11	8.17051e-05	0	17.2423	0	3	708.985	2124.94	0.263105	71.0224	7339	7339	MS2	17/206	170307_chiba_PAF15_02.raw
	High	ATPLSPTVILSMSADIPLVVEYK	Unambiguous	3	2	NP_001081011.1;NP_001082364.1		CID	1	0	1	1	47.11	0.000151738	0	5.09823	0	3	815.449	2444.33	-0.949989	121.858	14290	14290	MS2	7/214	170307_chiba_PAF15_02.raw
	High	ATPLSPTVILSMSADIPLVVEYK	Unambiguous	3	2	NP_001081011.1;NP_001082364.1		CID	1	0	1	1	47.05	0.000145959	0	4.413	0	3	815.45	2444.34	-0.275797	119.486	13975	13975	MS2	18/214	170307_chiba_PAF15_02.raw
	High	LMDLDVEQLGIPEQEYSCVIK	Unambiguous	4	2	NP_001081011.1;NP_001082364.1		CID	1	0	1	1	46.9	0.000278697	0	3.80705	6	3	808.068	2422.19	0.832868	148.66	17793	17793	MS2	17/214	170307_chiba_PAF15_02.raw
	High	ATPLSPTVILSMSADIPLVVEYK	Unambiguous	3	2	NP_001081011.1;NP_001082364.1		CID	1	0	1	1	46.9	0.000159256	0	3.2952	1	3	815.45	2444.34	0.398394	150.671	18002	18002	MS2	17/214	170307_chiba_PAF15_02.raw
	High	DLIDEACWDITSSGISLQSMDSSHVSLVQLTLR	Unambiguous	4	2	NP_001081011.1;NP_001082364.1		CID	1	0	1	1	46.81	0.000199069	0	53.1232	2	3	1207.26	3619.75	-2.37867	144.854	17332	17332	MS2	21/346	170307_chiba_PAF15_02.raw
	High	DLSQIGDAVVISCAK	Unambiguous	4	2	NP_001081011.1;NP_001082364.1		CID	1	0	1	1	46.79	0.00032354	0	38.4094	1	2	759.895	1518.78	-0.0333005	117.843	13757	13757	MS2	18/156	170307_chiba_PAF15_02.raw
	High	ATPLSPTVILSMSADIPLVVEYK	Unambiguous	3	2	NP_001081011.1;NP_001082364.1		CID	1	0	1	1	46.79	0.000154964	0	14.5205	13	3	815.45	2444.33	-0.350707	154.709	18464	18464	MS2	8/214	170307_chiba_PAF15_02.raw
	High	LVQGSILK	Unambiguous	4	2	NP_001081011.1;NP_001082364.1		CID	1	0	1	1	46.78	0.000398799	0	9.70981	16	2	429.277	857.546	0.28177	149.296	17859	17859	MS2	7/66	170307_chiba_PAF15_02.raw
	High	ATPLSPTVILSMSADIPLVVEYK	Unambiguous	3	2	NP_001081011.1;NP_001082364.1		CID	1	0	1	1	46.59	0.00016446	0	4.29396	0	3	815.45	2444.34	0.0987538	136.905	16285	16285	MS2	7/214	170307_chiba_PAF15_02.raw
	High	LSQTSNVDKEEEAVTIEMNEPVQLTFALR	Unambiguous	4	2	NP_001081011.1;NP_001082364.1		CID	1	0	1	1	46.56	0.00015456	1	5.1028	0	3	1097.89	3291.64	0.0314067	128.477	15172	15172	MS2	8/322	170307_chiba_PAF15_02.raw
	High	LSQTSNVDKEEEAVTIEMNEPVQLTFALR	Unambiguous	4	2	NP_001081011.1;NP_001082364.1		CID	1	0	1	1	46.54	0.000170801	1	4.40261	0	3	1097.88	3291.64	-0.636123	122.963	14437	14437	MS2	23/322	170307_chiba_PAF15_02.raw
	High	SDGFDTYR	Unambiguous	4	2	NP_001081011.1;NP_001082364.1		CID	1	0	1	1	46.43	2.26971e-05	0	16.0404	5	2	480.707	960.406	0.156275	154.459	18431	18431	MS2	6/66	170307_chiba_PAF15_02.raw
	High	MPSGEFAR	Unambiguous	4	2	NP_001081011.1;NP_001082364.1		CID	1	0	1	1	46.23	0.000129836	0	20.99	3	2	447.711	894.414	-0.142453	134.307	15943	15943	MS2	7/60	170307_chiba_PAF15_02.raw
	High	DLIDEACWDITSSGISLQSMDSSHVSLVQLTLR	Unambiguous	4	2	NP_001081011.1;NP_001082364.1		CID	1	0	1	1	46.03	0.000268169	0	7.56077	13	3	1207.26	3619.76	0.0494089	151.97	18154	18154	MS2	22/346	170307_chiba_PAF15_02.raw
	High	MPSGEFAR	Unambiguous	4	2	NP_001081011.1;NP_001082364.1		CID	1	0	1	1	46	0.000120571	0	20.4771	0	2	447.71	894.413	-0.688377	50.7295	4344	4344	MS2	7/60	170307_chiba_PAF15_02.raw
	High	DLIDEACWDITSSGISLQSMDSSHVSLVQLTLR	Unambiguous	4	2	NP_001081011.1;NP_001082364.1		CID	1	0	1	1	45.97	0.000266841	0	5.16695	0	3	1207.26	3619.76	-0.254101	120.123	14060	14060	MS2	18/346	170307_chiba_PAF15_02.raw
	High	LMDLDVEQLGIPEQEYSCVIK	Unambiguous	4	2	NP_001081011.1;NP_001082364.1		CID	1	0	1	1	45.57	0.000406291	0	41.9966	1	2	1211.6	2422.19	-0.446697	105.186	12070	12070	MS2	9/214	170307_chiba_PAF15_02.raw
	High	YLNFFTK	Unambiguous	4	2	NP_001081011.1;NP_001082364.1		CID	1	0	1	1	45.48	0.00047709	0	0	2	2	466.747	932.486	-1.23702	120.507	14111	14111	MS2	6/56	170307_chiba_PAF15_02.raw
	High	LMDLDVEQLGIPEQEYSCVIK	Unambiguous	4	2	NP_001081011.1;NP_001082364.1		CID	1	0	1	1	45.43	0.00039096	0	52.0683	4	2	1211.6	2422.19	-0.950664	122.368	14358	14358	MS2	13/214	170307_chiba_PAF15_02.raw
	High	LMDLDVEQLGIPEQEYSCVIK	Unambiguous	4	2	NP_001081011.1;NP_001082364.1		CID	1	0	1	1	45.41	0.000421539	0	12.2436	2	2	1211.6	2422.19	-0.345903	119.537	13982	13982	MS2	18/214	170307_chiba_PAF15_02.raw
	High	LMDLDVEQLGIPEQEYSCVIK	Unambiguous	4	2	NP_001081011.1;NP_001082364.1		CID	1	0	1	1	45.34	0.000410843	0	17.1499	6	3	808.068	2422.19	0.379298	145.056	17357	17357	MS2	18/214	170307_chiba_PAF15_02.raw
	High	YLNFFTK	Unambiguous	4	2	NP_001081011.1;NP_001082364.1		CID	1	0	1	1	45.3	0.000497279	0	23.8079	3	2	466.747	932.487	-1.04066	123.066	14451	14451	MS2	6/56	170307_chiba_PAF15_02.raw
	High	YLNFFTK	Unambiguous	4	2	NP_001081011.1;NP_001082364.1		CID	1	0	1	1	45.14	0.00046848	0	12.9144	2	2	466.747	932.488	-0.1243	127.656	15062	15062	MS2	6/56	170307_chiba_PAF15_02.raw
	High	ATPLSPTVILSMSADIPLVVEYK	Unambiguous	3	2	NP_001081011.1;NP_001082364.1		CID	1	0	1	1	45.07	0.000230267	0	2.35984	0	3	815.45	2444.34	-0.125977	134.508	15970	15970	MS2	9/214	170307_chiba_PAF15_02.raw
	High	MPSGEFAR	Unambiguous	4	2	NP_001081011.1;NP_001082364.1		CID	1	0	1	1	45.05	0.000146926	0	6.978	0	2	447.71	894.413	-0.620136	43.8832	3286	3286	MS2	7/60	170307_chiba_PAF15_02.raw
	High	ATPLSPTVILSMSADIPLVVEYK	Unambiguous	3	2	NP_001081011.1;NP_001082364.1		CID	1	0	1	1	44.89	0.000240011	0	2.56145	0	3	815.45	2444.34	-0.275797	131.346	15550	15550	MS2	19/214	170307_chiba_PAF15_02.raw
	High	DLIDEACWDITSSGISLQSMDSSHVSLVQLTLR	Unambiguous	4	2	NP_001081011.1;NP_001082364.1		CID	1	0	1	1	44.76	0.000369286	0	5.95769	0	3	1207.26	3619.76	-0.456441	121.543	14248	14248	MS2	30/346	170307_chiba_PAF15_02.raw
	High	YLNFFTK	Unambiguous	4	2	NP_001081011.1;NP_001082364.1		CID	1	0	1	1	44.71	0.000517239	0	3.88176	8	2	466.747	932.488	-0.058846	146.063	17481	17481	MS2	6/56	170307_chiba_PAF15_02.raw
	High	LMDLDVEQLGIPEQEYSCVIK	Unambiguous	4	2	NP_001081011.1;NP_001082364.1		CID	1	0	1	1	44.71	0.000496955	0	44.0693	2	2	1211.6	2422.19	0.158064	139.542	16632	16632	MS2	9/214	170307_chiba_PAF15_02.raw
	High	LMDLDVEQLGIPEQEYSCVIK	Unambiguous	4	2	NP_001081011.1;NP_001082364.1		CID	1	0	1	1	44.63	0.000457985	0	41.3148	8	2	1211.6	2422.19	1.87155	146.253	17504	17504	MS2	18/214	170307_chiba_PAF15_02.raw
	High	LVQGSILK	Unambiguous	4	2	NP_001081011.1;NP_001082364.1		CID	0.3333	0	1	1	44.62	0.000688562	0	0	4	2	429.276	857.545	-0.429972	140.99	16823	16823	MS2	7/66	170307_chiba_PAF15_02.raw
	High	YLNFFTK	Unambiguous	4	2	NP_001081011.1;NP_001082364.1		CID	1	0	1	1	44.61	0.000582908	0	4.41513	2	2	466.747	932.487	-0.713388	124.524	14644	14644	MS2	6/56	170307_chiba_PAF15_02.raw
	High	DLIDEACWDITSSGISLQSMDSSHVSLVQLTLR	Unambiguous	4	2	NP_001081011.1;NP_001082364.1		CID	1	0	1	1	44.49	0.0003663	0	5.2228	0	3	1207.26	3619.76	0.454088	119.336	13955	13955	MS2	19/346	170307_chiba_PAF15_02.raw
	High	LMDLDVEQLGIPEQEYSCVIK	Unambiguous	4	2	NP_001081011.1;NP_001082364.1		CID	1	0	1	1	44.47	0.000521618	0	35.9955	3	2	1211.6	2422.19	-0.648284	136.332	16209	16209	MS2	15/214	170307_chiba_PAF15_02.raw
	High	LVQGSILK	Unambiguous	4	2	NP_001081011.1;NP_001082364.1		CID	1	0	1	1	44.4	0.000724341	0	22.3319	18	2	429.276	857.545	-0.358798	150.144	17947	17947	MS2	7/66	170307_chiba_PAF15_02.raw
	High	ATPLSPTVILSMSADIPLVVEYK	Unambiguous	3	2	NP_001081011.1;NP_001082364.1		CID	1	0	1	1	44.36	0.000298647	0	3.39035	0	3	815.45	2444.34	0.173664	144.839	17330	17330	MS2	7/214	170307_chiba_PAF15_02.raw
	High	SDGFDTYR	Unambiguous	4	2	NP_001081011.1;NP_001082364.1		CID	1	0	1	1	44.3	3.70655e-05	0	33.6841	50	2	480.707	960.406	-0.0343789	148.705	17798	17798	MS2	7/66	170307_chiba_PAF15_02.raw
	High	LVQGSILK	Unambiguous	4	2	NP_001081011.1;NP_001082364.1		CID	1	0	1	1	44.23	0.000717387	0	19.5587	10	2	429.277	857.546	0.637641	146.383	17520	17520	MS2	6/66	170307_chiba_PAF15_02.raw
	High	ATPLSPTVILSMSADIPLVVEYK	Unambiguous	3	2	NP_001081011.1;NP_001082364.1		CID	1	0	1	1	44.22	0.000295185	0	4.49492	0	3	815.45	2444.34	0.323484	118.692	13870	13870	MS2	17/214	170307_chiba_PAF15_02.raw
	High	LVQGSILK	Unambiguous	4	2	NP_001081011.1;NP_001082364.1		CID	1	0	1	1	44.19	0.000724025	0	24.7765	3	2	429.277	857.546	0.851163	137.185	16321	16321	MS2	7/66	170307_chiba_PAF15_02.raw
	High	LMDLDVEQLGIPEQEYSCVIK	Unambiguous	4	2	NP_001081011.1;NP_001082364.1		CID	1	0	1	1	44.17	0.000558924	0	21.0304	2	2	1211.6	2422.19	-0.749077	124.674	14664	14664	MS2	11/214	170307_chiba_PAF15_02.raw
	High	LVQGSILK	Unambiguous	4	2	NP_001081011.1;NP_001082364.1		CID	1	0	1	1	44.13	0.000751484	0	26.7863	3	2	429.276	857.544	-1.71111	135.708	16127	16127	MS2	7/66	170307_chiba_PAF15_02.raw
	High	LMDLDVEQLGIPEQEYSCVIK	Unambiguous	4	2	NP_001081011.1;NP_001082364.1		CID	1	0	1	1	44.06	0.000577188	0	21.9737	1	3	808.068	2422.19	0.152513	104.457	11971	11971	MS2	14/214	170307_chiba_PAF15_02.raw
	High	ATPLSPTVILSMSADIPLVVEYK	Unambiguous	3	2	NP_001081011.1;NP_001082364.1		CID	1	0	1	1	44.06	0.00029841	0	4.77986	0	3	815.451	2444.34	1.14749	116.316	13555	13555	MS2	17/214	170307_chiba_PAF15_02.raw
	High	LVQGSILK	Unambiguous	4	2	NP_001081011.1;NP_001082364.1		CID	1	0	1	1	44.04	0.000786942	0	7.68279	3	2	429.276	857.545	-0.572321	127.211	15002	15002	MS2	7/66	170307_chiba_PAF15_02.raw
	High	LMDLDVEQLGIPEQEYSCVIK	Unambiguous	4	2	NP_001081011.1;NP_001082364.1		CID	1	0	1	1	44.04	0.000538434	0	12.8979	1	2	1211.6	2422.19	-0.950664	114.698	13337	13337	MS2	15/214	170307_chiba_PAF15_02.raw
	High	DLSQIGDAVVISCAK	Unambiguous	4	2	NP_001081011.1;NP_001082364.1		CID	1	0	1	1	44.03	0.000569328	0	2.73067	0	3	506.932	1518.78	-0.966453	84.0803	9188	9188	MS2	13/156	170307_chiba_PAF15_02.raw
	High	LSQTSNVDKEEEAVTIEMNEPVQLTFALR	Unambiguous	4	2	NP_001081011.1;NP_001082364.1		CID	1	0	1	1	43.95	0.00032016	1	4.5521	0	3	1097.89	3291.64	-0.191103	125.362	14754	14754	MS2	16/322	170307_chiba_PAF15_02.raw
	High	ATPLSPTVILSMSADIPLVVEYK	Unambiguous	3	2	NP_001081011.1;NP_001082364.1		CID	1	0	1	1	43.93	0.000299386	0	2.62433	0	3	815.45	2444.34	-0.200887	128.961	15235	15235	MS2	16/214	170307_chiba_PAF15_02.raw
	High	LVQGSILK	Unambiguous	4	2	NP_001081011.1;NP_001082364.1		CID	1	0	1	1	43.91	0.000810854	0	0	3	2	429.276	857.545	-0.785844	141.824	16933	16933	MS2	7/66	170307_chiba_PAF15_02.raw
	High	ATPLSPTVILSMSADIPLVVEYK	Unambiguous	3	2	NP_001081011.1;NP_001082364.1		CID	1	0	1	1	43.91	0.000300768	0	2.62946	0	3	815.45	2444.34	-0.125977	125.819	14815	14815	MS2	13/214	170307_chiba_PAF15_02.raw
	High	MPSGEFAR	Unambiguous	4	2	NP_001081011.1;NP_001082364.1		CID	1	0	1	1	43.84	0.000218915	0	11.012	22	2	447.711	894.414	0.335229	149.309	17861	17861	MS2	6/60	170307_chiba_PAF15_02.raw
	High	MPSGEFAR	Unambiguous	4	2	NP_001081011.1;NP_001082364.1		CID	1	0	1	1	43.79	0.00019638	0	11.4355	4	2	447.71	894.414	-0.347175	137.198	16323	16323	MS2	7/60	170307_chiba_PAF15_02.raw
	High	LVQGSILK	Unambiguous	4	2	NP_001081011.1;NP_001082364.1		CID	1	0	1	1	43.77	0.000797542	0	20.0503	3	2	429.276	857.545	-0.145275	141.342	16869	16869	MS2	7/66	170307_chiba_PAF15_02.raw
	High	YLNFFTK	Unambiguous	4	2	NP_001081011.1;NP_001082364.1		CID	1	0	1	1	43.71	0.000717133	0	11.0852	2	2	466.747	932.487	-0.844296	125.11	14721	14721	MS2	6/56	170307_chiba_PAF15_02.raw
	High	ATPLSPTVILSMSADIPLVVEYK	Unambiguous	3	2	NP_001081011.1;NP_001082364.1		CID	1	0	1	1	43.64	0.000328711	0	2.13607	1	3	815.451	2444.34	1.37222	148.267	17750	17750	MS2	18/214	170307_chiba_PAF15_02.raw
	High	YLNFFTK	Unambiguous	4	2	NP_001081011.1;NP_001082364.1		CID	1	0	1	1	43.63	0.000663272	0	11.6223	9	2	466.747	932.487	-0.451571	145.294	17387	17387	MS2	6/56	170307_chiba_PAF15_02.raw
	High	LMDLDVEQLGIPEQEYSCVIK	Unambiguous	4	2	NP_001081011.1;NP_001082364.1		CID	1	0	1	1	43.62	0.000634385	0	22.6745	1	2	1211.6	2422.19	-0.24511	113.203	13139	13139	MS2	7/214	170307_chiba_PAF15_02.raw
	High	LVQGSILK	Unambiguous	4	2	NP_001081011.1;NP_001082364.1		CID	1	0	1	1	43.49	0.000893188	0	40.7815	3	2	429.276	857.545	-0.928193	123.727	14538	14538	MS2	6/66	170307_chiba_PAF15_02.raw
	High	YLNFFTK	Unambiguous	4	2	NP_001081011.1;NP_001082364.1		CID	1	0	1	1	43.49	0.000754397	0	5.62062	3	2	466.747	932.487	-0.713388	135.114	16049	16049	MS2	6/56	170307_chiba_PAF15_02.raw
	High	ATPLSPTVILSMSADIPLVVEYK	Unambiguous	3	2	NP_001081011.1;NP_001082364.1		CID	1	0	1	1	43.45	0.000354707	0	6.0217	0	3	815.451	2444.34	0.548214	141.69	16915	16915	MS2	7/214	170307_chiba_PAF15_02.raw
	High	YLNFFTK	Unambiguous	4	2	NP_001081011.1;NP_001082364.1		CID	1	0	1	1	43.44	0.000763132	0	14.6821	3	2	466.747	932.487	-1.04066	127.366	15023	15023	MS2	6/56	170307_chiba_PAF15_02.raw
	High	YLNFFTK	Unambiguous	4	2	NP_001081011.1;NP_001082364.1		CID	1	0	1	1	43.43	0.000694531	0	8.03797	2	2	466.747	932.487	-0.255208	118.476	13841	13841	MS2	6/56	170307_chiba_PAF15_02.raw
	High	ATPLSPTVILSMSADIPLVVEYK	Unambiguous	3	2	NP_001081011.1;NP_001082364.1		CID	1	0	1	1	43.41	0.000351148	0	4.7479	0	3	815.451	2444.34	1.07258	117.904	13765	13765	MS2	15/214	170307_chiba_PAF15_02.raw
	High	YLNFFTK	Unambiguous	4	2	NP_001081011.1;NP_001082364.1		CID	1	0	1	1	43.38	0.000702573	0	26.9225	7	2	466.747	932.487	-0.451571	142.274	16992	16992	MS2	6/56	170307_chiba_PAF15_02.raw
	High	LMDLDVEQLGIPEQEYSCVIK	Unambiguous	4	2	NP_001081011.1;NP_001082364.1		CID	1	0	1	1	43.34	0.000681267	0	36.2047	3	2	1211.6	2422.19	0.158064	135.408	16088	16088	MS2	14/214	170307_chiba_PAF15_02.raw
	High	MPSGEFAR	Unambiguous	4	2	NP_001081011.1;NP_001082364.1		CID	1	0	1	1	43.31	0.00024033	0	0	3	2	447.71	894.414	-0.278934	130.188	15397	15397	MS2	7/60	170307_chiba_PAF15_02.raw
	High	ATPLSPTVILSMSADIPLVVEYK	Unambiguous	3	2	NP_001081011.1;NP_001082364.1		CID	1	0	1	1	43.25	0.000369058	0	2.96299	0	3	815.45	2444.34	0.398394	140.096	16705	16705	MS2	17/214	170307_chiba_PAF15_02.raw
	High	YLNFFTK	Unambiguous	4	2	NP_001081011.1;NP_001082364.1		CID	1	0	1	1	43.11	0.000735422	0	0	2	2	466.748	932.488	0.137516	108.09	12458	12458	MS2	6/56	170307_chiba_PAF15_02.raw
	High	MPSGEFAR	Unambiguous	4	2	NP_001081011.1;NP_001082364.1		CID	1	0	1	1	43.08	0.000265701	0	7.28164	3	2	447.71	894.413	-1.2343	131.804	15611	15611	MS2	7/60	170307_chiba_PAF15_02.raw
	High	YLNFFTK	Unambiguous	4	2	NP_001081011.1;NP_001082364.1		CID	1	0	1	1	43.06	0.000832914	0	12.9932	2	2	466.747	932.487	-0.647933	131.144	15523	15523	MS2	6/56	170307_chiba_PAF15_02.raw
	High	ATPLSPTVILSMSADIPLVVEYK	Unambiguous	3	2	NP_001081011.1;NP_001082364.1		CID	1	0	1	1	43.03	0.000390724	0	6.36891	0	3	815.451	2444.34	0.772944	140.895	16810	16810	MS2	17/214	170307_chiba_PAF15_02.raw
	High	YLNFFTK	Unambiguous	4	2	NP_001081011.1;NP_001082364.1		CID	1	0	1	1	43.01	0.000842558	0	7.26643	2	2	466.747	932.486	-1.23702	135.395	16086	16086	MS2	6/56	170307_chiba_PAF15_02.raw
	High	CAAGEDIITLR	Unambiguous	1	1	NP_001082364.1		CID	1	0	1	1	42.99	0.00119809	0	16.5145	1	2	581.3	1161.59	-0.938897	64.9254	6473	6473	MS2	9/88	170307_chiba_PAF15_02.raw
	High	LMDLDVEQLGIPEQEYSCVIK	Unambiguous	4	2	NP_001081011.1;NP_001082364.1		CID	1	0	1	1	42.98	0.000636928	0	55.8946	2	2	1211.6	2422.19	0.561238	118.787	13883	13883	MS2	7/214	170307_chiba_PAF15_02.raw
	High	LSQTSNVDKEEEAVTIEMNEPVQLTFALR	Unambiguous	4	2	NP_001081011.1;NP_001082364.1		CID	1	0	1	1	42.95	0.000403058	1	6.28414	0	3	1097.89	3291.64	-0.191103	133.887	15888	15888	MS2	11/322	170307_chiba_PAF15_02.raw
	High	YLNFFTK	Unambiguous	4	2	NP_001081011.1;NP_001082364.1		CID	1	0	1	1	42.93	0.000858223	0	7.48739	2	2	466.747	932.487	-0.90975	127.796	15081	15081	MS2	6/56	170307_chiba_PAF15_02.raw
	High	LSQTSNVDKEEEAVTIEMNEPVQLTFALR	Unambiguous	4	2	NP_001081011.1;NP_001082364.1		CID	1	0	1	1	42.93	0.000410011	1	6.39309	0	3	1097.89	3291.64	-0.0798481	137.711	16391	16391	MS2	11/322	170307_chiba_PAF15_02.raw
	High	YLNFFTK	Unambiguous	4	2	NP_001081011.1;NP_001082364.1		CID	1	0	1	1	42.9	0.000864171	0	16.6299	2	2	466.747	932.487	-0.713388	140.932	16815	16815	MS2	6/56	170307_chiba_PAF15_02.raw
	High	LVQGSILK	Unambiguous	4	2	NP_001081011.1;NP_001082364.1		CID	1	0	1	1	42.87	0.00103025	0	14.674	4	2	429.276	857.545	-0.857018	138.762	16530	16530	MS2	6/66	170307_chiba_PAF15_02.raw
	High	LVQGSILK	Unambiguous	4	2	NP_001081011.1;NP_001082364.1		CID	1	0	1	1	42.85	0.00103501	0	35.8345	3	2	429.276	857.545	-0.928193	132.083	15648	15648	MS2	7/66	170307_chiba_PAF15_02.raw
	High	LSQTSNVDKEEEAVTIEMNEPVQLTFALR	Unambiguous	4	2	NP_001081011.1;NP_001082364.1		CID	1	0	1	1	42.84	0.000387397	1	3.09049	2	3	1097.89	3291.64	0.698935	148.099	17729	17729	MS2	12/322	170307_chiba_PAF15_02.raw
	High	YLNFFTK	Unambiguous	4	2	NP_001081011.1;NP_001082364.1		CID	1	0	1	1	42.8	0.000884301	0	18.214	2	2	466.747	932.487	-0.975205	128.407	15162	15162	MS2	6/56	170307_chiba_PAF15_02.raw
	High	YLNFFTK	Unambiguous	4	2	NP_001081011.1;NP_001082364.1		CID	1	0	1	1	42.77	0.000808521	0	5.48681	0	2	466.747	932.487	-0.320663	67.8727	6898	6898	MS2	6/56	170307_chiba_PAF15_02.raw
	High	YLNFFTK	Unambiguous	4	2	NP_001081011.1;NP_001082364.1		CID	1	0	1	1	42.76	0.000892483	0	5.42766	2	2	466.747	932.487	-1.10611	127.481	15038	15038	MS2	6/56	170307_chiba_PAF15_02.raw
	High	YLNFFTK	Unambiguous	4	2	NP_001081011.1;NP_001082364.1		CID	1	0	1	1	42.76	0.000810385	0	5.53612	0	2	466.747	932.487	-0.386117	69.6652	7150	7150	MS2	6/56	170307_chiba_PAF15_02.raw
	High	LMDLDVEQLGIPEQEYSCVIK	Unambiguous	4	2	NP_001081011.1;NP_001082364.1		CID	1	0	1	1	42.75	0.000775091	0	4.99891	0	3	808.067	2422.19	-0.225463	96.939	10954	10954	MS2	20/214	170307_chiba_PAF15_02.raw
	High	LMDLDVEQLGIPEQEYSCVIK	Unambiguous	4	2	NP_001081011.1;NP_001082364.1		CID	1	0	1	1	42.71	0.000768868	0	33.9591	2	2	1211.6	2422.19	0.0572708	137.895	16415	16415	MS2	17/214	170307_chiba_PAF15_02.raw
	High	LVQGSILK	Unambiguous	4	2	NP_001081011.1;NP_001082364.1		CID	1	0	1	1	42.55	0.00110903	0	25.0103	3	2	429.276	857.544	-1.21289	136.572	16241	16241	MS2	7/66	170307_chiba_PAF15_02.raw
	High	ATPLSPTVILSMSADIPLVVEYK	Unambiguous	3	2	NP_001081011.1;NP_001082364.1		CID	1	0	1	1	42.52	0.000431013	0	24.7125	4	3	815.451	2444.34	1.07258	154.583	18448	18448	MS2	7/214	170307_chiba_PAF15_02.raw
	High	LMDLDVEQLGIPEQEYSCVIK	Unambiguous	4	2	NP_001081011.1;NP_001082364.1		CID	1	0	1	1	42.47	0.000801229	0	11.0914	0	3	808.068	2422.19	-0.0742723	100.968	11499	11499	MS2	19/214	170307_chiba_PAF15_02.raw
	High	DLSQIGDAVVISCAK	Unambiguous	4	2	NP_001081011.1;NP_001082364.1		CID	1	0	1	1	42.43	0.000834359	0	67.021	2	2	759.896	1518.79	1.1723	116.359	13561	13561	MS2	7/156	170307_chiba_PAF15_02.raw
	High	LMDLDVEQLGIPEQEYSCVIK	Unambiguous	4	2	NP_001081011.1;NP_001082364.1		CID	1	0	1	1	42.39	0.00082766	0	23.9273	2	2	1211.6	2422.19	-0.0435226	123.982	14572	14572	MS2	12/214	170307_chiba_PAF15_02.raw
	High	ATPLSPTVILSMSADIPLVVEYK	Unambiguous	3	2	NP_001081011.1;NP_001082364.1		CID	1	0	1	1	42.35	0.000430756	0	2.95407	0	3	815.45	2444.34	-0.200887	129.759	15340	15340	MS2	19/214	170307_chiba_PAF15_02.raw
	High	LMDLDVEQLGIPEQEYSCVIK	Unambiguous	4	2	NP_001081011.1;NP_001082364.1		CID	1	0	1	1	42.25	0.000872645	0	2.13639	0	3	808.067	2422.19	-0.376653	94.6011	10638	10638	MS2	11/214	170307_chiba_PAF15_02.raw
	High	LVQGSILK	Unambiguous	4	2	NP_001081011.1;NP_001082364.1		CID	1	0	1	1	42.23	0.00113698	0	36.616	4	2	429.277	857.546	0.352944	154.454	18430	18430	MS2	6/66	170307_chiba_PAF15_02.raw
	High	MPSGEFAR	Unambiguous	4	2	NP_001081011.1;NP_001082364.1		CID	1	0	1	1	42.16	0.000322312	0	77.1748	4	2	447.711	894.414	0.335229	126.727	14937	14937	MS2	7/60	170307_chiba_PAF15_02.raw
	High	YLNFFTK	Unambiguous	4	2	NP_001081011.1;NP_001082364.1		CID	1	0	1	1	42.15	0.000932591	0	17.4515	3	2	466.747	932.487	-0.189754	129.987	15370	15370	MS2	6/56	170307_chiba_PAF15_02.raw
	High	YLNFFTK	Unambiguous	4	2	NP_001081011.1;NP_001082364.1		CID	1	0	1	1	42.12	0.000939056	0	43.5299	3	2	466.747	932.487	-0.582479	123.732	14539	14539	MS2	6/56	170307_chiba_PAF15_02.raw
	High	LSQTSNVDKEEEAVTIEMNEPVQLTFALR	Unambiguous	4	2	NP_001081011.1;NP_001082364.1		CID	1	0	1	1	42.04	0.000481383	1	5.26476	0	3	1097.88	3291.64	-0.636123	120.59	14122	14122	MS2	11/322	170307_chiba_PAF15_02.raw
	High	YLNFFTK	Unambiguous	4	2	NP_001081011.1;NP_001082364.1		CID	1	0	1	1	42.03	0.00105584	0	19.6592	3	2	466.747	932.487	-0.844296	132.088	15649	15649	MS2	6/56	170307_chiba_PAF15_02.raw
	High	YLNFFTK	Unambiguous	4	2	NP_001081011.1;NP_001082364.1		CID	1	0	1	1	41.88	0.000992411	0	9.4842	3	2	466.747	932.488	-0.058846	137.991	16428	16428	MS2	6/56	170307_chiba_PAF15_02.raw
	High	LVQGSILK	Unambiguous	4	2	NP_001081011.1;NP_001082364.1		CID	1	0	1	1	41.82	0.00124955	0	6.40479	0	2	429.276	857.546	0.0682475	47.4225	3834	3834	MS2	6/66	170307_chiba_PAF15_02.raw
	High	LVQGSILK	Unambiguous	4	2	NP_001081011.1;NP_001082364.1		CID	1	0	1	1	41.81	0.00125243	0	31.9928	4	2	429.277	857.546	0.566467	137.529	16367	16367	MS2	7/66	170307_chiba_PAF15_02.raw
	High	YLNFFTK	Unambiguous	4	2	NP_001081011.1;NP_001082364.1		CID	1	0	1	1	41.7	0.00177472	0	14.2463	2	2	466.747	932.486	-1.6952	122.001	14309	14309	MS2	6/56	170307_chiba_PAF15_02.raw
	High	YLNFFTK	Unambiguous	4	2	NP_001081011.1;NP_001082364.1		CID	1	0	1	1	41.69	0.00114183	0	10.7899	3	2	466.747	932.487	-1.10611	129.058	15248	15248	MS2	6/56	170307_chiba_PAF15_02.raw
	High	YLNFFTK	Unambiguous	4	2	NP_001081011.1;NP_001082364.1		CID	1	0	1	1	41.67	0.00104158	0	7.01338	4	2	466.747	932.487	-0.386117	137.801	16403	16403	MS2	6/56	170307_chiba_PAF15_02.raw
	High	MPSGEFAR	Unambiguous	4	2	NP_001081011.1;NP_001082364.1		CID	1	0	1	1	41.64	0.000370164	0	19.335	3	2	447.71	894.413	-1.16606	141.959	16951	16951	MS2	7/60	170307_chiba_PAF15_02.raw
	High	MPSGEFAR	Unambiguous	4	2	NP_001081011.1;NP_001082364.1		CID	1	0	1	1	41.6	0.000373589	0	0	3	2	447.71	894.413	-1.37078	136.513	16233	16233	MS2	7/60	170307_chiba_PAF15_02.raw
	High	YLNFFTK	Unambiguous	4	2	NP_001081011.1;NP_001082364.1		CID	1	0	1	1	41.59	0.00106094	0	14.8128	2	2	466.747	932.487	-0.582479	110.45	12773	12773	MS2	6/56	170307_chiba_PAF15_02.raw
	High	YLNFFTK	Unambiguous	4	2	NP_001081011.1;NP_001082364.1		CID	1	0	1	1	41.54	0.00184132	0	28.725	3	2	466.747	932.486	-1.6952	112.99	13111	13111	MS2	6/56	170307_chiba_PAF15_02.raw
	High	YLNFFTK	Unambiguous	4	2	NP_001081011.1;NP_001082364.1		CID	1	0	1	1	41.53	0.00184556	0	21.1666	2	2	466.747	932.486	-1.56429	131.607	15584	15584	MS2	6/56	170307_chiba_PAF15_02.raw
	High	YLNFFTK	Unambiguous	4	2	NP_001081011.1;NP_001082364.1		CID	1	0	1	1	41.45	0.0010957	0	0	2	2	466.747	932.487	-0.255208	131.762	15605	15605	MS2	6/56	170307_chiba_PAF15_02.raw
	High	LVQGSILK	Unambiguous	4	2	NP_001081011.1;NP_001082364.1		CID	1	0	1	1	41.41	0.00144193	0	28.854	3	2	429.276	857.545	-0.429972	132.829	15747	15747	MS2	7/66	170307_chiba_PAF15_02.raw
	High	YLNFFTK	Unambiguous	4	2	NP_001081011.1;NP_001082364.1		CID	1	0	1	1	41.31	0.0011316	0	6.30615	0	2	466.747	932.488	0.0720623	68.7611	7024	7024	MS2	6/56	170307_chiba_PAF15_02.raw
	High	MPSGEFAR	Unambiguous	4	2	NP_001081011.1;NP_001082364.1		CID	1	0	1	1	41.3	0.000400308	0	19.8757	3	2	447.71	894.413	-1.09782	129.079	15251	15251	MS2	7/60	170307_chiba_PAF15_02.raw
	High	MPSGEFAR	Unambiguous	4	2	NP_001081011.1;NP_001082364.1		CID	1	0	1	1	41.28	0.000402155	0	22.8104	2	2	447.71	894.413	-0.893098	128.452	15169	15169	MS2	7/60	170307_chiba_PAF15_02.raw
	High	YLNFFTK	Unambiguous	4	2	NP_001081011.1;NP_001082364.1		CID	1	0	1	1	41.26	0.0011447	0	10.446	3	2	466.747	932.487	-0.582479	128.111	15123	15123	MS2	6/56	170307_chiba_PAF15_02.raw
	High	LMDLDVEQLGIPEQEYSCVIK	Unambiguous	4	2	NP_001081011.1;NP_001082364.1		CID	1	0	1	1	41.23	0.00109613	0	33.9712	3	2	1211.6	2422.19	-0.144316	136.657	16252	16252	MS2	7/214	170307_chiba_PAF15_02.raw
	High	DLIDEACWDITSSGISLQSMDSSHVSLVQLTLR	Unambiguous	4	2	NP_001081011.1;NP_001082364.1		CID	1	0	1	1	41.19	0.000737516	0	21.7089	2	2	1810.39	3619.77	1.08168	135.713	16128	16128	MS2	8/346	170307_chiba_PAF15_02.raw
	High	YLNFFTK	Unambiguous	4	2	NP_001081011.1;NP_001082364.1		CID	1	0	1	1	41.17	0.00200507	0	18.1124	2	2	466.746	932.486	-2.21884	122.122	14325	14325	MS2	6/56	170307_chiba_PAF15_02.raw
	High	LMDLDVEQLGIPEQEYSCVIK	Unambiguous	4	2	NP_001081011.1;NP_001082364.1		CID	1	0	1	1	41.15	0.000970712	0	27.2631	19	2	1211.6	2422.19	0.662031	147.322	17636	17636	MS2	7/214	170307_chiba_PAF15_02.raw
	High	YLNFFTK	Unambiguous	4	2	NP_001081011.1;NP_001082364.1		CID	1	0	1	1	41.12	0.00116288	0	16.6094	3	2	466.748	932.488	0.268425	126.416	14895	14895	MS2	6/56	170307_chiba_PAF15_02.raw
	High	SDGFDTYR	Unambiguous	4	2	NP_001081011.1;NP_001082364.1		CID	1	0	1	1	41.12	0.000131356	0	16.8099	55	2	480.707	960.407	1.23665	150.04	17935	17935	MS2	7/66	170307_chiba_PAF15_02.raw
	High	MPSGEFAR	Unambiguous	4	2	NP_001081011.1;NP_001082364.1		CID	1	0	1	1	41.09	0.00042014	0	4.4792	0	2	447.71	894.413	-1.09782	48.973	4071	4071	MS2	6/60	170307_chiba_PAF15_02.raw
	High	MPSGEFAR	Unambiguous	4	2	NP_001081011.1;NP_001082364.1		CID	1	0	1	1	41.07	0.000414263	0	7.77909	2	2	447.711	894.414	0.198749	126.552	14913	14913	MS2	7/60	170307_chiba_PAF15_02.raw
	High	YLNFFTK	Unambiguous	4	2	NP_001081011.1;NP_001082364.1		CID	1	0	1	1	41.07	0.00131704	0	25.0812	0	2	466.747	932.487	-1.04066	73.0085	7613	7613	MS2	6/56	170307_chiba_PAF15_02.raw
	High	LMDLDVEQLGIPEQEYSCVIK	Unambiguous	4	2	NP_001081011.1;NP_001082364.1		CID	1	0	1	1	41.07	0.00112164	0	37.7943	2	2	1211.6	2422.19	-0.0435226	121.299	14216	14216	MS2	8/214	170307_chiba_PAF15_02.raw
	High	ATPLSPTVILSMSADIPLVVEYK	Unambiguous	3	2	NP_001081011.1;NP_001082364.1		CID	1	0	1	1	41.02	0.000585102	0	3.42376	0	3	815.45	2444.34	-0.200887	136.11	16180	16180	MS2	25/214	170307_chiba_PAF15_02.raw
	High	DLIDEACWDITSSGISLQSMDSSHVSLVQLTLR	Unambiguous	4	2	NP_001081011.1;NP_001082364.1		CID	1	0	1	1	41.02	0.00084998	0	22.6867	0	3	1207.26	3619.76	0.0494089	133.084	15781	15781	MS2	34/346	170307_chiba_PAF15_02.raw
	High	LVQGSILK	Unambiguous	4	2	NP_001081011.1;NP_001082364.1		CID	1	0	1	1	40.99	0.00158834	0	46.7193	4	2	429.276	857.545	-0.501147	139.597	16639	16639	MS2	7/66	170307_chiba_PAF15_02.raw
	High	SDGFDTYR	Unambiguous	4	2	NP_001081011.1;NP_001082364.1		CID	1	0	1	1	40.96	7.99779e-05	0	30.7387	40	2	480.707	960.406	0.34693	148.589	17786	17786	MS2	7/66	170307_chiba_PAF15_02.raw
	High	LVQGSILK	Unambiguous	4	2	NP_001081011.1;NP_001082364.1		CID	1	0	1	1	40.91	0.00161787	0	12.4184	15	2	429.276	857.545	-0.429972	150.714	18009	18009	MS2	7/66	170307_chiba_PAF15_02.raw
	High	ATPLSPTVILSMSADIPLVVEYK	Unambiguous	3	2	NP_001081011.1;NP_001082364.1		CID	1	0	1	1	40.89	0.000639543	0	5.27256	0	3	815.45	2444.34	0.248574	122.648	14395	14395	MS2	6/214	170307_chiba_PAF15_02.raw
	High	LVQGSILK	Unambiguous	4	2	NP_001081011.1;NP_001082364.1		CID	1	0	1	1	40.79	0.00158399	0	20.1483	21	2	429.276	857.546	0.0682475	148.513	17777	17777	MS2	6/66	170307_chiba_PAF15_02.raw
	High	LSQTSNVDKEEEAVTIEMNEPVQLTFALR	Unambiguous	4	2	NP_001081011.1;NP_001082364.1		CID	1	0	1	1	40.7	0.000804325	1	24.719	1	2	1646.33	3291.65	1.90828	100.709	11464	11464	MS2	18/322	170307_chiba_PAF15_02.raw
	High	YLNFFTK	Unambiguous	4	2	NP_001081011.1;NP_001082364.1		CID	1	0	1	1	40.69	0.00130524	0	4.11587	2	2	466.747	932.488	-0.058846	130.177	15395	15395	MS2	6/56	170307_chiba_PAF15_02.raw
	High	LMDLDVEQLGIPEQEYSCVIK	Unambiguous	4	2	NP_001081011.1;NP_001082364.1		CID	1	0	1	1	40.69	0.00120287	0	31.0234	2	2	1211.6	2422.19	0.258858	118.628	13862	13862	MS2	23/214	170307_chiba_PAF15_02.raw
	High	ATPLSPTVILSMSADIPLVVEYK	Unambiguous	3	2	NP_001081011.1;NP_001082364.1		CID	1	0	1	1	40.61	0.0006691	0	2.4884	0	3	815.451	2444.34	1.07258	146.561	17540	17540	MS2	8/214	170307_chiba_PAF15_02.raw
	High	YLNFFTK	Unambiguous	4	2	NP_001081011.1;NP_001082364.1		CID	1	0	1	1	40.57	0.00230213	0	6.64752	2	2	466.747	932.486	-1.82611	130.645	15457	15457	MS2	5/56	170307_chiba_PAF15_02.raw
	High	LVQGSILK	Unambiguous	4	2	NP_001081011.1;NP_001082364.1		CID	0.1951	0	1	1	40.56	0.00175365	0	37.96	3	2	429.276	857.545	-0.928193	136.401	16218	16218	MS2	7/66	170307_chiba_PAF15_02.raw
	High	LMDLDVEQLGIPEQEYSCVIK	Unambiguous	4	2	NP_001081011.1;NP_001082364.1		CID	1	0	1	1	40.51	0.00130268	0	63.0939	3	2	1211.6	2422.19	-0.446697	130.75	15471	15471	MS2	8/214	170307_chiba_PAF15_02.raw
	High	SDGFDTYR	Unambiguous	4	2	NP_001081011.1;NP_001082364.1		CID	1	0	1	1	40.44	9.01509e-05	0	25.3887	43	2	480.707	960.406	-0.0343789	151.143	18060	18060	MS2	7/66	170307_chiba_PAF15_02.raw
	High	LMDLDVEQLGIPEQEYSCVIK	Unambiguous	4	2	NP_001081011.1;NP_001082364.1		CID	1	0	1	1	40.37	0.00133617	0	49.2973	8	3	808.067	2422.19	-0.149867	144.901	17338	17338	MS2	15/214	170307_chiba_PAF15_02.raw
	High	SDGFDTYR	Unambiguous	4	2	NP_001081011.1;NP_001082364.1		CID	1	0	1	1	40.36	9.18269e-05	0	27.318	26	2	480.707	960.406	0.219827	152.522	18217	18217	MS2	7/66	170307_chiba_PAF15_02.raw
	High	LMDLDVEQLGIPEQEYSCVIK	Unambiguous	4	2	NP_001081011.1;NP_001082364.1		CID	1	0	1	1	40.35	0.00136079	0	5.27258	12	3	808.068	2422.19	0.228108	151.074	18052	18052	MS2	17/214	170307_chiba_PAF15_02.raw
	High	LMDLDVEQLGIPEQEYSCVIK	Unambiguous	4	2	NP_001081011.1;NP_001082364.1		CID	1	0	1	1	40.32	0.00126804	0	21.8669	6	3	808.068	2422.19	0.984058	146.803	17571	17571	MS2	12/214	170307_chiba_PAF15_02.raw
	High	MPSGEFAR	Unambiguous	4	2	NP_001081011.1;NP_001082364.1		CID	1	0	1	1	40.29	0.000505119	0	38.1872	3	2	447.71	894.413	-1.16606	120.573	14120	14120	MS2	7/60	170307_chiba_PAF15_02.raw
	High	YLNFFTK	Unambiguous	4	2	NP_001081011.1;NP_001082364.1		CID	1	0	1	1	40.27	0.00143778	0	0	3	2	466.747	932.487	-0.386117	129.581	15317	15317	MS2	6/56	170307_chiba_PAF15_02.raw
	High	YLNFFTK	Unambiguous	4	2	NP_001081011.1;NP_001082364.1		CID	1	0	1	1	40.25	0.00142081	0	0	17	2	466.748	932.488	0.20297	147.705	17682	17682	MS2	6/56	170307_chiba_PAF15_02.raw
	High	LMDLDVEQLGIPEQEYSCVIK	Unambiguous	4	2	NP_001081011.1;NP_001082364.1		CID	1	0	1	1	40.24	0.00139097	0	56.2327	2	2	1211.6	2422.19	0.158064	140.785	16796	16796	MS2	20/214	170307_chiba_PAF15_02.raw
	High	YLNFFTK	Unambiguous	4	2	NP_001081011.1;NP_001082364.1		CID	1	0	1	1	40.23	0.00145108	0	12.2277	3	2	466.747	932.488	0.00660816	126.882	14958	14958	MS2	6/56	170307_chiba_PAF15_02.raw
	High	YLNFFTK	Unambiguous	4	2	NP_001081011.1;NP_001082364.1		CID	1	0	1	1	40.21	0.00145778	0	12.9654	2	2	466.747	932.488	-0.058846	122.774	14412	14412	MS2	6/56	170307_chiba_PAF15_02.raw
	High	YLNFFTK	Unambiguous	4	2	NP_001081011.1;NP_001082364.1		CID	1	0	1	1	40.19	0.00146451	0	24.9403	3	2	466.747	932.488	-0.058846	141.615	16905	16905	MS2	6/56	170307_chiba_PAF15_02.raw
	High	YLNFFTK	Unambiguous	4	2	NP_001081011.1;NP_001082364.1		CID	1	0	1	1	40.16	0.00162405	0	17.791	3	2	466.747	932.487	-1.17157	136.073	16175	16175	MS2	6/56	170307_chiba_PAF15_02.raw
	High	YLNFFTK	Unambiguous	4	2	NP_001081011.1;NP_001082364.1		CID	1	0	1	1	40.16	0.00147466	0	10.3362	3	2	466.747	932.488	-0.1243	143.488	17152	17152	MS2	6/56	170307_chiba_PAF15_02.raw
	High	ATPLSPTVILSMSADIPLVVEYK	Unambiguous	3	2	NP_001081011.1;NP_001082364.1		CID	1	0	1	1	40.16	0.000742148	0	4.17533	1	3	815.451	2444.34	0.847854	149.065	17834	17834	MS2	21/214	170307_chiba_PAF15_02.raw
	High	YLNFFTK	Unambiguous	4	2	NP_001081011.1;NP_001082364.1		CID	1	0	1	1	40.13	0.00163531	0	5.45113	3	2	466.747	932.487	-0.844296	132.834	15748	15748	MS2	6/56	170307_chiba_PAF15_02.raw
	High	SDGFDTYR	Unambiguous	4	2	NP_001081011.1;NP_001082364.1		CID	1	0	1	1	40.11	0.000165748	0	27.7037	55	2	480.707	960.407	1.04599	149.214	17850	17850	MS2	7/66	170307_chiba_PAF15_02.raw
	High	LMDLDVEQLGIPEQEYSCVIK	Unambiguous	4	2	NP_001081011.1;NP_001082364.1		CID	1	0	1	1	40.1	0.00143165	0	28.9797	1	2	1211.6	2422.19	-0.446697	110.204	12740	12740	MS2	12/214	170307_chiba_PAF15_02.raw
	High	YLNFFTK	Unambiguous	4	2	NP_001081011.1;NP_001082364.1		CID	1	0	1	1	40.09	0.00165044	0	4.67431	3	2	466.747	932.487	-0.647933	143.942	17213	17213	MS2	6/56	170307_chiba_PAF15_02.raw
	High	YLNFFTK	Unambiguous	4	2	NP_001081011.1;NP_001082364.1		CID	1	0	1	1	40.07	0.00150554	0	0	3	2	466.747	932.487	-0.386117	134.769	16004	16004	MS2	6/56	170307_chiba_PAF15_02.raw
	High	LMDLDVEQLGIPEQEYSCVIK	Unambiguous	4	2	NP_001081011.1;NP_001082364.1		CID	1	0	1	1	40	0.001285	0	36.6773	2	2	1211.6	2422.18	-1.55543	118.911	13899	13899	MS2	8/214	170307_chiba_PAF15_02.raw
	High	MPSGEFAR	Unambiguous	4	2	NP_001081011.1;NP_001082364.1		CID	1	0	1	1	39.95	0.000536137	0	8.34456	29	2	447.711	894.414	0.0622679	150.157	17949	17949	MS2	7/60	170307_chiba_PAF15_02.raw
	High	YLNFFTK	Unambiguous	4	2	NP_001081011.1;NP_001082364.1		CID	1	0	1	1	39.93	0.00171238	0	12.0288	1	2	466.747	932.487	-1.04066	80.2824	8654	8654	MS2	6/56	170307_chiba_PAF15_02.raw
	High	YLNFFTK	Unambiguous	4	2	NP_001081011.1;NP_001082364.1		CID	1	0	1	1	39.88	0.00154716	0	18.0448	2	2	466.748	932.488	0.137516	112.038	12984	12984	MS2	6/56	170307_chiba_PAF15_02.raw
	High	MPSGEFAR	Unambiguous	4	2	NP_001081011.1;NP_001082364.1		CID	1	0	1	1	39.86	0.000557691	0	8.60534	3	2	447.71	894.413	-1.16606	124.351	14621	14621	MS2	7/60	170307_chiba_PAF15_02.raw
	High	MPSGEFAR	Unambiguous	4	2	NP_001081011.1;NP_001082364.1		CID	1	0	1	1	39.85	0.000486517	0	5.60037	28	2	447.71	894.413	-0.415415	150.966	18037	18037	MS2	6/60	170307_chiba_PAF15_02.raw
	High	YLNFFTK	Unambiguous	4	2	NP_001081011.1;NP_001082364.1		CID	1	0	1	1	39.8	0.00176441	0	29.4564	2	2	466.747	932.487	-0.90975	125.883	14824	14824	MS2	6/56	170307_chiba_PAF15_02.raw
	High	LSQTSNVDKEEEAVTIEMNEPVQLTFALR	Unambiguous	4	2	NP_001081011.1;NP_001082364.1		CID	1	0	1	1	39.79	0.000839634	1	1.66143	0	3	1097.88	3291.64	-0.858632	91.4934	10216	10216	MS2	12/322	170307_chiba_PAF15_02.raw
	High	LMDLDVEQLGIPEQEYSCVIK	Unambiguous	4	2	NP_001081011.1;NP_001082364.1		CID	1	0	1	1	39.78	0.00132021	0	60.5286	3	2	1211.6	2422.19	0.460444	118.129	13795	13795	MS2	7/214	170307_chiba_PAF15_02.raw
	High	YLNFFTK	Unambiguous	4	2	NP_001081011.1;NP_001082364.1		CID	1	0	1	1	39.75	0.00178484	0	22.0662	3	2	466.747	932.487	-1.10611	136.814	16273	16273	MS2	6/56	170307_chiba_PAF15_02.raw
	High	YLNFFTK	Unambiguous	4	2	NP_001081011.1;NP_001082364.1		CID	1	0	1	1	39.75	0.00162066	0	11.2408	0	2	466.747	932.488	0.00660816	70.5849	7278	7278	MS2	6/56	170307_chiba_PAF15_02.raw
	High	YLNFFTK	Unambiguous	4	2	NP_001081011.1;NP_001082364.1		CID	1	0	1	1	39.69	0.00180967	0	0	2	2	466.747	932.487	-0.975205	105.394	12098	12098	MS2	6/56	170307_chiba_PAF15_02.raw
	High	LMDLDVEQLGIPEQEYSCVIK	Unambiguous	4	2	NP_001081011.1;NP_001082364.1		CID	1	0	1	1	39.66	0.00157889	0	24.3831	2	2	1211.6	2422.19	-0.24511	134.606	15983	15983	MS2	10/214	170307_chiba_PAF15_02.raw
	High	DLSQIGDAVVISCAK	Unambiguous	4	2	NP_001081011.1;NP_001082364.1		CID	1	0	1	1	39.56	0.00202512	0	46.6007	2	2	759.896	1518.78	0.529315	117.164	13667	13667	MS2	11/156	170307_chiba_PAF15_02.raw
	High	MPSGEFAR	Unambiguous	4	2	NP_001081011.1;NP_001082364.1		CID	1	0	1	1	39.54	0.000522514	0	6.28036	2	2	447.71	894.413	-0.551896	122.27	14345	14345	MS2	7/60	170307_chiba_PAF15_02.raw
	High	DLSQIGDAVVISCAK	Unambiguous	4	2	NP_001081011.1;NP_001082364.1		CID	1	0	1	1	39.45	0.00183304	0	20.1364	12	3	506.933	1518.78	1.0228	146.102	17486	17486	MS2	10/156	170307_chiba_PAF15_02.raw
	High	ATPLSPTVILSMSADIPLVVEYK	Unambiguous	3	2	NP_001081011.1;NP_001082364.1		CID	1	0	1	1	39.38	0.00086509	0	2.76153	0	3	815.45	2444.34	0.0238437	135.313	16075	16075	MS2	17/214	170307_chiba_PAF15_02.raw
	High	LMDLDVEQLGIPEQEYSCVIK	Unambiguous	4	2	NP_001081011.1;NP_001082364.1		CID	1	0	1	1	39.36	0.00168023	0	18.9474	0	3	808.067	2422.19	-0.603438	100.206	11396	11396	MS2	15/214	170307_chiba_PAF15_02.raw
	High	LVQGSILK	Unambiguous	4	2	NP_001081011.1;NP_001082364.1		CID	1	0	1	1	39.34	0.00221184	0	43.48	3	2	429.276	857.545	-0.145275	139.705	16653	16653	MS2	6/66	170307_chiba_PAF15_02.raw
	High	MPSGEFAR	Unambiguous	4	2	NP_001081011.1;NP_001082364.1		CID	1	0	1	1	39.33	0.000618409	0	38.4099	5	2	447.711	894.414	0.130508	132.737	15735	15735	MS2	7/60	170307_chiba_PAF15_02.raw
	High	LMDLDVEQLGIPEQEYSCVIK	Unambiguous	4	2	NP_001081011.1;NP_001082364.1		CID	1	0	1	1	39.3	0.00160374	0	5.30172	6	3	808.068	2422.19	0.908463	149.47	17877	17877	MS2	18/214	170307_chiba_PAF15_02.raw
	High	LMDLDVEQLGIPEQEYSCVIK	Unambiguous	4	2	NP_001081011.1;NP_001082364.1		CID	1	0	1	1	39.28	0.00170556	0	13.3779	0	3	808.067	2422.19	-0.527843	98.5067	11166	11166	MS2	13/214	170307_chiba_PAF15_02.raw
	High	LSQTSNVDKEEEAVTIEMNEPVQLTFALR	Unambiguous	4	2	NP_001081011.1;NP_001082364.1		CID	1	0	1	1	39.28	0.000832126	1	49.2006	2	2	1646.33	3291.65	1.53743	106.183	12204	12204	MS2	21/322	170307_chiba_PAF15_02.raw
	High	MPSGEFAR	Unambiguous	4	2	NP_001081011.1;NP_001082364.1		CID	1	0	1	1	39.26	0.000628457	0	18.9018	3	2	447.711	894.414	0.198749	127.809	15083	15083	MS2	7/60	170307_chiba_PAF15_02.raw
	High	YLNFFTK	Unambiguous	4	2	NP_001081011.1;NP_001082364.1		CID	1	0	1	1	39.26	0.00178458	0	22.0611	2	2	466.748	932.488	0.137516	123.569	14517	14517	MS2	6/56	170307_chiba_PAF15_02.raw
	High	LMDLDVEQLGIPEQEYSCVIK	Unambiguous	4	2	NP_001081011.1;NP_001082364.1		CID	1	0	1	1	39.26	0.00167193	0	23.5323	1	2	1211.6	2422.19	0.258858	110.745	12813	12813	MS2	17/214	170307_chiba_PAF15_02.raw
	High	YLNFFTK	Unambiguous	4	2	NP_001081011.1;NP_001082364.1		CID	1	0	1	1	39.25	0.00200263	0	17.7771	1	2	466.747	932.486	-1.30248	81.6368	8843	8843	MS2	6/56	170307_chiba_PAF15_02.raw
	High	MPSGEFAR	Unambiguous	4	2	NP_001081011.1;NP_001082364.1		CID	1	0	1	1	39.17	0.000611352	0	15.8738	2	2	447.71	894.413	-0.824858	127.301	15014	15014	MS2	7/60	170307_chiba_PAF15_02.raw
	High	MPSGEFAR	Unambiguous	4	2	NP_001081011.1;NP_001082364.1		CID	1	0	1	1	39.07	0.000582234	0	11.0763	3	2	447.71	894.414	-0.347175	141.313	16865	16865	MS2	7/60	170307_chiba_PAF15_02.raw
	High	YLNFFTK	Unambiguous	4	2	NP_001081011.1;NP_001082364.1		CID	1	0	1	1	38.99	0.0019306	0	9.75676	0	2	466.747	932.487	-0.386117	62.5635	6125	6125	MS2	6/56	170307_chiba_PAF15_02.raw
	High	MPSGEFAR	Unambiguous	4	2	NP_001081011.1;NP_001082364.1		CID	1	0	1	1	38.84	0.000705332	0	21.637	3	2	447.71	894.413	-1.43902	130.789	15476	15476	MS2	7/60	170307_chiba_PAF15_02.raw
	High	LMDLDVEQLGIPEQEYSCVIK	Unambiguous	4	2	NP_001081011.1;NP_001082364.1		CID	1	0	1	1	38.79	0.00178375	0	4.03846	7	3	808.068	2422.19	1.05965	150.278	17962	17962	MS2	18/214	170307_chiba_PAF15_02.raw
	High	SDGFDTYR	Unambiguous	4	2	NP_001081011.1;NP_001082364.1		CID	1	0	1	1	38.78	0.00013212	0	50.0771	5	2	480.707	960.406	0.410481	140.862	16806	16806	MS2	7/66	170307_chiba_PAF15_02.raw
	High	MPSGEFAR	Unambiguous	4	2	NP_001081011.1;NP_001082364.1		CID	1	0	1	1	38.76	0.000725098	0	8.10118	21	2	447.71	894.414	-0.210694	147.719	17684	17684	MS2	6/60	170307_chiba_PAF15_02.raw
	High	SDGFDTYR	Unambiguous	4	2	NP_001081011.1;NP_001082364.1		CID	1	0	1	1	38.72	0.000214842	0	41.5377	1	2	480.706	960.405	-0.606342	47.1111	3788	3788	MS2	7/66	170307_chiba_PAF15_02.raw
	High	YLNFFTK	Unambiguous	4	2	NP_001081011.1;NP_001082364.1		CID	1	0	1	1	38.68	0.00203956	0	7.5151	2	2	466.748	932.488	0.137516	109.362	12627	12627	MS2	6/56	170307_chiba_PAF15_02.raw
	High	YLNFFTK	Unambiguous	4	2	NP_001081011.1;NP_001082364.1		CID	1	0	1	1	38.65	0.00229932	0	1.2978	0	2	466.747	932.486	-1.23702	75.3805	7948	7948	MS2	6/56	170307_chiba_PAF15_02.raw
	High	LMDLDVEQLGIPEQEYSCVIK	Unambiguous	4	2	NP_001081011.1;NP_001082364.1		CID	1	0	1	1	38.62	0.00201297	0	29.4735	1	2	1211.6	2422.19	-0.345903	104.449	11970	11970	MS2	15/214	170307_chiba_PAF15_02.raw
	High	LMDLDVEQLGIPEQEYSCVIK	Unambiguous	4	2	NP_001081011.1;NP_001082364.1		CID	1	0	1	1	38.57	0.00170269	0	35.9353	2	2	1211.6	2422.19	2.37551	117.947	13771	13771	MS2	13/214	170307_chiba_PAF15_02.raw
	High	YLNFFTK	Unambiguous	4	2	NP_001081011.1;NP_001082364.1		CID	1	0	1	1	38.51	0.00237465	0	11.4379	2	2	466.747	932.487	-0.90975	121.33	14220	14220	MS2	6/56	170307_chiba_PAF15_02.raw
	High	ATPLSPTVILSmSADIPLVVEYK	Unambiguous	3	2	NP_001081011.1;NP_001082364.1	M12(Oxidation)	CID	1	0	1	1	38.48	0.00115653	0	34.2797	1	3	820.781	2460.33	-0.911249	102.009	11640	11640	MS2	17/214	170307_chiba_PAF15_02.raw
	High	MPSGEFAR	Unambiguous	4	2	NP_001081011.1;NP_001082364.1		CID	1	0	1	1	38.44	0.000773381	0	13.4256	3	2	447.71	894.413	-0.961339	127.604	15055	15055	MS2	7/60	170307_chiba_PAF15_02.raw
	High	YLNFFTK	Unambiguous	4	2	NP_001081011.1;NP_001082364.1		CID	1	0	1	1	38.43	0.0024188	0	7.25297	3	2	466.747	932.487	-0.844296	133.611	15852	15852	MS2	6/56	170307_chiba_PAF15_02.raw
	High	YLNFFTK	Unambiguous	4	2	NP_001081011.1;NP_001082364.1		CID	1	0	1	1	38.36	0.0024581	0	5.11316	0	2	466.747	932.486	-1.23702	74.6521	7843	7843	MS2	6/56	170307_chiba_PAF15_02.raw
	High	YLNFFTK	Unambiguous	4	2	NP_001081011.1;NP_001082364.1		CID	1	0	1	1	38.27	0.00224149	0	2.81273	15	2	466.748	932.488	0.333879	149.772	17906	17906	MS2	6/56	170307_chiba_PAF15_02.raw
	High	LVQGSILK	Unambiguous	4	2	NP_001081011.1;NP_001082364.1		CID	1	0	1	1	38.23	0.00285597	0	39.6811	3	2	429.277	857.546	0.424119	139.847	16672	16672	MS2	7/66	170307_chiba_PAF15_02.raw
	High	ATPLSPTVILSMSADIPLVVEYK	Unambiguous	3	2	NP_001081011.1;NP_001082364.1		CID	1	0	1	1	38.22	0.00111489	0	3.08041	0	3	815.45	2444.33	-0.425617	128.165	15130	15130	MS2	18/214	170307_chiba_PAF15_02.raw
	High	LSQTSNVDKEEEAVTIEMNEPVQLTFALR	Unambiguous	4	2	NP_001081011.1;NP_001082364.1		CID	1	0	1	1	38.14	0.00107423	1	6.69163	0	3	1097.89	3291.64	0.0314067	129.922	15361	15361	MS2	18/322	170307_chiba_PAF15_02.raw
	High	LMDLDVEQLGIPEQEYSCVIK	Unambiguous	4	2	NP_001081011.1;NP_001082364.1		CID	1	0	1	1	38.13	0.00204575	0	59.7947	3	2	1211.6	2422.19	1.87155	142.749	17054	17054	MS2	15/214	170307_chiba_PAF15_02.raw
	High	LMDLDVEQLGIPEQEYSCVIK	Unambiguous	4	2	NP_001081011.1;NP_001082364.1		CID	1	0	1	1	38.06	0.0022822	0	18.2524	1	2	1211.6	2422.19	-0.24511	111.523	12916	12916	MS2	7/214	170307_chiba_PAF15_02.raw
	High	LMDLDVEQLGIPEQEYSCVIK	Unambiguous	4	2	NP_001081011.1;NP_001082364.1		CID	1	0	1	1	37.98	0.00210968	0	27.3652	1	3	808.069	2422.19	1.28644	140.777	16795	16795	MS2	14/214	170307_chiba_PAF15_02.raw
	High	ATPLSPTVILSMSADIPLVVEYK	Unambiguous	3	2	NP_001081011.1;NP_001082364.1		CID	1	0	1	1	37.98	0.00119416	0	2.40179	0	3	815.45	2444.34	0.0238437	133.71	15865	15865	MS2	7/214	170307_chiba_PAF15_02.raw
	High	MPSGEFAR	Unambiguous	4	2	NP_001081011.1;NP_001082364.1		CID	1	0	1	1	37.96	0.000847766	0	11.9966	16	2	447.711	894.414	0.266989	151.647	18117	18117	MS2	7/60	170307_chiba_PAF15_02.raw
	High	YLNFFTK	Unambiguous	4	2	NP_001081011.1;NP_001082364.1		CID	1	0	1	1	37.95	0.00420852	0	12.9203	1	2	466.747	932.486	-1.82611	79.2493	8507	8507	MS2	5/56	170307_chiba_PAF15_02.raw
	High	LMDLDVEQLGIPEQEYSCVIK	Unambiguous	4	2	NP_001081011.1;NP_001082364.1		CID	1	0	1	1	37.95	0.00235677	0	52.6151	3	2	1211.6	2422.19	0.158064	138.732	16526	16526	MS2	14/214	170307_chiba_PAF15_02.raw
	High	MPSGEFAR	Unambiguous	4	2	NP_001081011.1;NP_001082364.1		CID	1	0	1	1	37.94	0.000755262	0	26.6798	4	2	447.71	894.414	-0.347175	131.299	15544	15544	MS2	7/60	170307_chiba_PAF15_02.raw
	High	MPSGEFAR	Unambiguous	4	2	NP_001081011.1;NP_001082364.1		CID	1	0	1	1	37.91	0.000857582	0	20.6586	4	2	447.711	894.414	-0.0742129	140.232	16723	16723	MS2	7/60	170307_chiba_PAF15_02.raw
	High	LVQGSILK	Unambiguous	4	2	NP_001081011.1;NP_001082364.1		CID	1	0	1	1	37.88	0.00325045	0	40.1909	0	2	429.276	857.545	-0.643495	52.479	4614	4614	MS2	6/66	170307_chiba_PAF15_02.raw
	High	MPSGEFAR	Unambiguous	4	2	NP_001081011.1;NP_001082364.1		CID	1	0	1	1	37.64	0.000809278	0	0	3	2	447.71	894.414	-0.347175	132.986	15768	15768	MS2	7/60	170307_chiba_PAF15_02.raw
	High	LSQTSNVDKEEEAVTIEMNEPVQLTFALR	Unambiguous	4	2	NP_001081011.1;NP_001082364.1		CID	1	0	1	1	37.57	0.00129489	1	22.7735	1	2	1646.32	3291.64	-0.539325	94.4693	10621	10621	MS2	22/322	170307_chiba_PAF15_02.raw
	High	MPSGEFAR	Unambiguous	4	2	NP_001081011.1;NP_001082364.1		CID	1	0	1	1	37.51	0.000958062	0	19.4974	4	2	447.71	894.413	-1.2343	136.087	16177	16177	MS2	7/60	170307_chiba_PAF15_02.raw
	High	LVQGSILK	Unambiguous	4	2	NP_001081011.1;NP_001082364.1		CID	1	0	1	1	37.48	0.00356404	0	36.7504	3	2	429.276	857.545	-0.71467	140.238	16724	16724	MS2	7/66	170307_chiba_PAF15_02.raw
	High	LMDLDVEQLGIPEQEYSCVIK	Unambiguous	4	2	NP_001081011.1;NP_001082364.1		CID	1	0	1	1	37.44	0.00246112	0	32.5366	21	2	1211.6	2422.19	0.863617	147.006	17597	17597	MS2	17/214	170307_chiba_PAF15_02.raw
	High	YLNFFTK	Unambiguous	4	2	NP_001081011.1;NP_001082364.1		CID	1	0	1	1	37.39	0.00307326	0	11.3893	2	2	466.747	932.486	-1.23702	104.042	11915	11915	MS2	6/56	170307_chiba_PAF15_02.raw
	High	LSQTSNVDKEEEAVTIEMNEPVQLTFALR	Unambiguous	4	2	NP_001081011.1;NP_001082364.1		CID	1	0	1	1	37.35	0.00146341	1	4.63373	0	3	1097.89	3291.64	-0.191103	93.8167	10533	10533	MS2	10/322	170307_chiba_PAF15_02.raw
	High	ATPLSPTVILSMSADIPLVVEYK	Unambiguous	3	2	NP_001081011.1;NP_001082364.1		CID	1	0	1	1	37.31	0.00145838	0	1.84611	0	3	815.449	2444.33	-0.875078	130.555	15445	15445	MS2	13/214	170307_chiba_PAF15_02.raw
	High	LSQTSNVDKEEEAVTIEMNEPVQLTFALR	Unambiguous	4	2	NP_001081011.1;NP_001082364.1		CID	1	0	1	1	37.29	0.00130647	1	58.9029	3	2	1646.32	3291.64	0.202374	107.584	12391	12391	MS2	24/322	170307_chiba_PAF15_02.raw
	High	LSQTSNVDKEEEAVTIEMNEPVQLTFALR	Unambiguous	4	2	NP_001081011.1;NP_001082364.1		CID	1	0	1	1	37.28	0.00130948	1	4.23937	0	3	1097.89	3291.64	0.253916	108.603	12526	12526	MS2	11/322	170307_chiba_PAF15_02.raw
	High	YLNFFTK	Unambiguous	4	2	NP_001081011.1;NP_001082364.1		CID	1	0	1	1	37.26	0.00287535	0	7.78579	13	2	466.747	932.488	0.00660816	148.13	17733	17733	MS2	6/56	170307_chiba_PAF15_02.raw
	High	LSQTSNVDKEEEAVTIEMNEPVQLTFALR	Unambiguous	4	2	NP_001081011.1;NP_001082364.1		CID	1	0	1	1	37.23	0.00132464	1	59.8622	2	2	1646.32	3291.64	0.128204	109.191	12605	12605	MS2	20/322	170307_chiba_PAF15_02.raw
	High	LVQGSILK	Unambiguous	4	2	NP_001081011.1;NP_001082364.1		CID	1	0	1	1	37.15	0.00384541	0	17.469	1	2	429.276	857.545	-0.999367	102.936	11765	11765	MS2	7/66	170307_chiba_PAF15_02.raw
	High	ATPLSPTVILSMSADIPLVVEYK	Unambiguous	3	2	NP_001081011.1;NP_001082364.1		CID	1	0	1	1	37.14	0.00148762	0	2.31065	0	3	815.451	2444.34	1.07258	144.041	17226	17226	MS2	14/214	170307_chiba_PAF15_02.raw
	High	MPSGEFAR	Unambiguous	4	2	NP_001081011.1;NP_001082364.1		CID	1	0	1	1	37.09	0.00161233	0	0	4	2	447.71	894.412	-1.78023	128.14	15127	15127	MS2	6/60	170307_chiba_PAF15_02.raw
	High	MPSGEFAR	Unambiguous	4	2	NP_001081011.1;NP_001082364.1		CID	1	0	1	1	37.07	0.00106021	0	10.6891	4	2	447.71	894.413	-1.16606	133.692	15863	15863	MS2	7/60	170307_chiba_PAF15_02.raw
	High	MPSGEFAR	Unambiguous	4	2	NP_001081011.1;NP_001082364.1		CID	1	0	1	1	37.06	0.000924907	0	7.77335	17	2	447.71	894.413	-0.415415	152.829	18251	18251	MS2	7/60	170307_chiba_PAF15_02.raw
	High	MPSGEFAR	Unambiguous	4	2	NP_001081011.1;NP_001082364.1		CID	1	0	1	1	37.05	0.00106511	0	0	3	2	447.71	894.413	-0.961339	133.364	15819	15819	MS2	7/60	170307_chiba_PAF15_02.raw
	High	MPSGEFAR	Unambiguous	4	2	NP_001081011.1;NP_001082364.1		CID	1	0	1	1	37.01	0.00107496	0	18.3823	4	2	447.71	894.413	-1.2343	135.76	16134	16134	MS2	7/60	170307_chiba_PAF15_02.raw
	High	MPSGEFAR	Unambiguous	4	2	NP_001081011.1;NP_001082364.1		CID	1	0	1	1	37	0.00105749	0	17.6773	4	2	447.711	894.414	0.266989	140.529	16762	16762	MS2	6/60	170307_chiba_PAF15_02.raw
	High	YLNFFTK	Unambiguous	4	2	NP_001081011.1;NP_001082364.1		CID	1	0	1	1	37	0.00336202	0	19.3558	3	2	466.747	932.487	-0.90975	138.605	16509	16509	MS2	6/56	170307_chiba_PAF15_02.raw
	High	DLSQIGDAVVISCAK	Unambiguous	4	2	NP_001081011.1;NP_001082364.1		CID	1	0	1	1	36.99	0.00308979	0	47.0758	2	2	759.895	1518.78	-0.0333005	115.796	13485	13485	MS2	18/156	170307_chiba_PAF15_02.raw
	High	MPSGEFAR	Unambiguous	4	2	NP_001081011.1;NP_001082364.1		CID	1	0	1	1	36.96	0.00108741	0	18.8515	3	2	447.71	894.413	-1.16606	123.737	14540	14540	MS2	7/60	170307_chiba_PAF15_02.raw
	High	YLNFFTK	Unambiguous	4	2	NP_001081011.1;NP_001082364.1		CID	1	0	1	1	36.88	0.00531251	0	12.2383	4	2	466.748	932.488	0.399333	144.306	17261	17261	MS2	6/56	170307_chiba_PAF15_02.raw
	High	LMDLDVEQLGIPEQEYSCVIK	Unambiguous	4	2	NP_001081011.1;NP_001082364.1		CID	1	0	1	1	36.85	0.00281924	0	18.3696	1	3	808.068	2422.19	0.832868	143.197	17113	17113	MS2	14/214	170307_chiba_PAF15_02.raw
	High	LMDLDVEQLGIPEQEYSCVIK	Unambiguous	4	2	NP_001081011.1;NP_001082364.1		CID	1	0	1	1	36.83	0.00280113	0	34.9436	1	3	808.067	2422.19	-1.1326	109.161	12601	12601	MS2	16/214	170307_chiba_PAF15_02.raw
	High	YLNFFTK	Unambiguous	4	2	NP_001081011.1;NP_001082364.1		CID	1	0	1	1	36.81	0.00318927	0	12.2251	1	2	466.747	932.487	-0.517025	85.1801	9345	9345	MS2	6/56	170307_chiba_PAF15_02.raw
	High	LVQGSILK	Unambiguous	4	2	NP_001081011.1;NP_001082364.1		CID	1	0	1	1	36.8	0.00416815	0	21.126	0	2	429.276	857.545	-0.643495	48.2773	3963	3963	MS2	6/66	170307_chiba_PAF15_02.raw
	High	MPSGEFAR	Unambiguous	4	2	NP_001081011.1;NP_001082364.1		CID	1	0	1	1	36.77	0.00113604	0	0	3	2	447.71	894.413	-1.09782	135.25	16067	16067	MS2	6/60	170307_chiba_PAF15_02.raw
	High	LVQGSILK	Unambiguous	4	2	NP_001081011.1;NP_001082364.1		CID	1	0	1	1	36.69	0.00427507	0	56.2971	3	2	429.276	857.544	-1.21289	131.138	15522	15522	MS2	7/66	170307_chiba_PAF15_02.raw
	High	YLNFFTK	Unambiguous	4	2	NP_001081011.1;NP_001082364.1		CID	1	0	1	1	36.69	0.00361077	0	0	3	2	466.747	932.487	-0.90975	111.103	12860	12860	MS2	6/56	170307_chiba_PAF15_02.raw
	High	YLNFFTK	Unambiguous	4	2	NP_001081011.1;NP_001082364.1		CID	1	0	1	1	36.61	0.00333958	0	0	3	2	466.747	932.488	-0.058846	134.318	15945	15945	MS2	6/56	170307_chiba_PAF15_02.raw
	High	YLNFFTK	Unambiguous	4	2	NP_001081011.1;NP_001082364.1		CID	1	0	1	1	36.37	0.00352932	0	29.2949	2	2	466.747	932.487	-0.189754	124.148	14594	14594	MS2	6/56	170307_chiba_PAF15_02.raw
	High	LSQTSNVDKEEEAVTIEMNEPVQLTFALR	Unambiguous	4	2	NP_001081011.1;NP_001082364.1		CID	1	0	1	1	36.36	0.0020693	1	52.8659	1	2	1646.33	3291.65	2.72414	92.3194	10330	10330	MS2	23/322	170307_chiba_PAF15_02.raw
	High	LMDLDVEQLGIPEQEYSCVIK	Unambiguous	4	2	NP_001081011.1;NP_001082364.1		CID	1	0	1	1	36.23	0.00313275	0	16.9113	2	3	808.069	2422.19	2.04239	139.19	16586	16586	MS2	9/214	170307_chiba_PAF15_02.raw
	High	LVQGSILK	Unambiguous	4	2	NP_001081011.1;NP_001082364.1		CID	1	0	1	1	36.19	0.0047967	0	9.02323	3	2	429.276	857.545	-0.999367	133.971	15899	15899	MS2	7/66	170307_chiba_PAF15_02.raw
	High	LVQGSILK	Unambiguous	4	2	NP_001081011.1;NP_001082364.1		CID	1	0	1	1	36.15	0.00484109	0	14.8728	3	2	429.276	857.545	-1.14172	134.094	15915	15915	MS2	7/66	170307_chiba_PAF15_02.raw
	High	LMDLDVEQLGIPEQEYSCVIK	Unambiguous	4	2	NP_001081011.1;NP_001082364.1		CID	1	0	1	1	36.12	0.00359184	0	46.5438	1	3	808.068	2422.19	0.152513	112.177	13003	13003	MS2	17/214	170307_chiba_PAF15_02.raw
	High	LSQTSNVDKEEEAVTIEMNEPVQLTFALR	Unambiguous	4	2	NP_001081011.1;NP_001082364.1		CID	1	0	1	1	35.96	0.00201543	1	5.67143	0	3	1097.89	3291.64	-0.302358	126.138	14858	14858	MS2	10/322	170307_chiba_PAF15_02.raw
	High	MPSGEFAR	Unambiguous	4	2	NP_001081011.1;NP_001082364.1		CID	1	0	1	1	35.93	0.00119977	0	9.16741	3	2	447.71	894.413	-0.551896	129.228	15271	15271	MS2	7/60	170307_chiba_PAF15_02.raw
	High	LMDLDVEQLGIPEQEYSCVIK	Unambiguous	4	2	NP_001081011.1;NP_001082364.1		CID	1	0	1	1	35.86	0.00348917	0	25.3882	2	2	1211.6	2422.19	1.166	119.233	13942	13942	MS2	13/214	170307_chiba_PAF15_02.raw
	High	LSQTSNVDKEEEAVTIEMNEPVQLTFALR	Unambiguous	4	2	NP_001081011.1;NP_001082364.1		CID	1	0	1	1	35.79	0.00205634	1	7.13234	0	3	1097.88	3291.64	-0.413613	136.431	16222	16222	MS2	11/322	170307_chiba_PAF15_02.raw
	High	YLNFFTK	Unambiguous	4	2	NP_001081011.1;NP_001082364.1		CID	1	0	1	1	35.76	0.00406155	0	22.3153	0	2	466.747	932.488	-0.058846	71.3583	7385	7385	MS2	6/56	170307_chiba_PAF15_02.raw
	High	YLNFFTK	Unambiguous	4	2	NP_001081011.1;NP_001082364.1		CID	1	0	1	1	35.57	0.00467304	0	8.26638	3	2	466.747	932.486	-1.23702	121.685	14267	14267	MS2	6/56	170307_chiba_PAF15_02.raw
	High	MPSGEFAR	Unambiguous	4	2	NP_001081011.1;NP_001082364.1		CID	1	0	1	1	35.53	0.00366667	0	21.3732	28	2	447.711	894.415	0.881152	148.544	17781	17781	MS2	7/60	170307_chiba_PAF15_02.raw
	High	YLNFFTK	Unambiguous	4	2	NP_001081011.1;NP_001082364.1		CID	1	0	1	1	35.52	0.00736426	0	3.91347	0	2	466.747	932.486	-1.56429	73.8973	7738	7738	MS2	6/56	170307_chiba_PAF15_02.raw
	High	LVQGSILK	Unambiguous	4	2	NP_001081011.1;NP_001082364.1		CID	1	0	1	1	35.48	0.00564863	0	14.4241	9	2	429.276	857.544	-1.42641	145.53	17417	17417	MS2	6/66	170307_chiba_PAF15_02.raw
	High	YLNFFTK	Unambiguous	4	2	NP_001081011.1;NP_001082364.1		CID	1	0	1	1	35.46	0.00435203	0	3.91782	12	2	466.747	932.488	-0.1243	148.933	17819	17819	MS2	6/56	170307_chiba_PAF15_02.raw
	High	LVQGSILK	Unambiguous	4	2	NP_001081011.1;NP_001082364.1		CID	0.2286	0	1	1	35.44	0.00570089	0	29.236	0	2	429.276	857.544	-1.35524	51.0379	4391	4391	MS2	7/66	170307_chiba_PAF15_02.raw
	High	YLNFFTK	Unambiguous	4	2	NP_001081011.1;NP_001082364.1		CID	1	0	1	1	35.41	0.00484842	0	33.9613	0	2	466.747	932.486	-1.30248	72.5502	7550	7550	MS2	6/56	170307_chiba_PAF15_02.raw
	High	LVQGSILK	Unambiguous	4	2	NP_001081011.1;NP_001082364.1		CID	1	0	1	1	35.28	0.0057666	0	50.5985	4	2	429.276	857.544	-1.56876	133.538	15842	15842	MS2	6/66	170307_chiba_PAF15_02.raw
	High	YLNFFTK	Unambiguous	4	2	NP_001081011.1;NP_001082364.1		CID	1	0	1	1	35.27	0.00454665	0	47.1929	0	2	466.747	932.487	-0.582479	77.4709	8253	8253	MS2	6/56	170307_chiba_PAF15_02.raw
	High	YLNFFTK	Unambiguous	4	2	NP_001081011.1;NP_001082364.1		CID	1	0	1	1	35.23	0.00697305	0	28.1909	0	2	466.747	932.486	-1.36793	75.8464	8015	8015	MS2	6/56	170307_chiba_PAF15_02.raw
	High	YLNFFTK	Unambiguous	4	2	NP_001081011.1;NP_001082364.1		CID	1	0	1	1	35.23	0.00505359	0	16.2173	2	2	466.747	932.487	-0.778842	120.341	14089	14089	MS2	6/56	170307_chiba_PAF15_02.raw
	High	LMDLDVEQLGIPEQEYSCVIK	Unambiguous	4	2	NP_001081011.1;NP_001082364.1		CID	1	0	1	1	35.08	0.00391175	0	6.33042	1	3	808.068	2422.19	0.530488	139.981	16690	16690	MS2	8/214	170307_chiba_PAF15_02.raw
	High	LMDLDVEQLGIPEQEYSCVIK	Unambiguous	4	2	NP_001081011.1;NP_001082364.1		CID	1	0	1	1	35.01	0.00443278	0	37.1091	2	2	1211.6	2422.19	0.359651	143.473	17150	17150	MS2	12/214	170307_chiba_PAF15_02.raw
	High	DLIDEACWDITSSGISLQSMDSSHVSLVQLTLR	Unambiguous	4	2	NP_001081011.1;NP_001082364.1		CID	1	0	1	1	34.99	0.00334389	0	3.98169	0	3	1207.26	3619.76	-0.254101	133.879	15887	15887	MS2	22/346	170307_chiba_PAF15_02.raw
	High	YLNFFTK	Unambiguous	4	2	NP_001081011.1;NP_001082364.1		CID	1	0	1	1	34.92	0.00492824	0	6.04307	2	2	466.747	932.487	-0.189754	132.36	15685	15685	MS2	6/56	170307_chiba_PAF15_02.raw
	High	LVQGSILK	Unambiguous	4	2	NP_001081011.1;NP_001082364.1		CID	1	0	1	1	34.9	0.00614828	0	14.4749	22	2	429.277	857.546	0.424119	151.099	18055	18055	MS2	6/66	170307_chiba_PAF15_02.raw
	High	YLNFFTK	Unambiguous	4	2	NP_001081011.1;NP_001082364.1		CID	1	0	1	1	34.75	0.00564417	0	20.835	2	2	466.747	932.487	-0.844296	126.034	14844	14844	MS2	6/56	170307_chiba_PAF15_02.raw
	High	LMDLDVEQLGIPEQEYSCVIK	Unambiguous	4	2	NP_001081011.1;NP_001082364.1		CID	1	0	1	1	34.62	0.00507361	0	52.1434	2	2	1211.6	2422.19	0.158064	128.675	15198	15198	MS2	8/214	170307_chiba_PAF15_02.raw
	High	YLNFFTK	Unambiguous	4	2	NP_001081011.1;NP_001082364.1		CID	1	0	1	1	34.61	0.00529287	0	10.0533	2	2	466.747	932.487	-0.582479	120.977	14173	14173	MS2	6/56	170307_chiba_PAF15_02.raw
	High	LMDLDVEQLGIPEQEYSCVIK	Unambiguous	4	2	NP_001081011.1;NP_001082364.1		CID	1	0	1	1	34.57	0.00441662	0	34.4244	2	2	1211.6	2422.19	0.561238	141.24	16855	16855	MS2	13/214	170307_chiba_PAF15_02.raw
	High	LMDLDVEQLGIPEQEYSCVIK	Unambiguous	4	2	NP_001081011.1;NP_001082364.1		CID	1	0	1	1	34.51	0.00507986	0	9.30998	0	2	1211.6	2422.19	-0.0435226	96.1609	10847	10847	MS2	23/214	170307_chiba_PAF15_02.raw
	High	LMDLDVEQLGIPEQEYSCVIK	Unambiguous	4	2	NP_001081011.1;NP_001082364.1		CID	1	0	1	1	34.48	0.00500814	0	53.1622	1	2	1211.6	2422.19	0.359651	141.734	16921	16921	MS2	19/214	170307_chiba_PAF15_02.raw
	High	MPSGEFAR	Unambiguous	4	2	NP_001081011.1;NP_001082364.1		CID	1	0	1	1	34.42	0.00195161	0	25.0415	5	2	447.71	894.413	-1.09782	138.951	16555	16555	MS2	7/60	170307_chiba_PAF15_02.raw
	High	LMDLDVEQLGIPEQEYSCVIK	Unambiguous	4	2	NP_001081011.1;NP_001082364.1		CID	1	0	1	1	34.28	0.00535614	0	15.2594	0	3	808.068	2422.19	0.00132273	103.703	11869	11869	MS2	14/214	170307_chiba_PAF15_02.raw
	High	YLNFFTK	Unambiguous	4	2	NP_001081011.1;NP_001082364.1		CID	1	0	1	1	34.2	0.00997997	0	9.58498	2	2	466.747	932.486	-1.6952	106.314	12221	12221	MS2	6/56	170307_chiba_PAF15_02.raw
	High	AEDNADTVTMVFESPNQEK	Unambiguous	4	2	NP_001081011.1;NP_001082364.1		CID	1	0	1	1	34.13	0.00164206	0	39.2108	2	2	1062.97	2124.94	-0.620988	93.7475	10524	10524	MS2	10/206	170307_chiba_PAF15_02.raw
	High	ATPLSPTVILSMSADIPLVVEYK	Unambiguous	3	2	NP_001081011.1;NP_001082364.1		CID	1	0	1	1	34.12	0.00294316	0	4.27796	0	3	815.451	2444.34	1.67186	115.54	13450	13450	MS2	16/214	170307_chiba_PAF15_02.raw
	High	DLIDEACWDITSSGISLQSMDSSHVSLVQLTLR	Unambiguous	4	2	NP_001081011.1;NP_001082364.1		CID	1	0	1	1	33.94	0.00498502	0	23.8775	3	2	1810.39	3619.77	2.7004	134.652	15989	15989	MS2	10/346	170307_chiba_PAF15_02.raw
	High	MPSGEFAR	Unambiguous	4	2	NP_001081011.1;NP_001082364.1		CID	1	0	1	1	33.93	0.00208357	0	17.7051	29	2	447.71	894.414	-0.278934	147.471	17654	17654	MS2	7/60	170307_chiba_PAF15_02.raw
	High	MPSGEFAR	Unambiguous	4	2	NP_001081011.1;NP_001082364.1		CID	1	0	1	1	33.83	0.0022563	0	10.2595	4	2	447.711	894.414	-0.142453	143.508	17155	17155	MS2	7/60	170307_chiba_PAF15_02.raw
	High	MPSGEFAR	Unambiguous	4	2	NP_001081011.1;NP_001082364.1		CID	1	0	1	1	33.77	0.00228769	0	30.5019	3	2	447.71	894.414	-0.210694	138.282	16467	16467	MS2	7/60	170307_chiba_PAF15_02.raw
	High	LVQGSILK	Unambiguous	4	2	NP_001081011.1;NP_001082364.1		CID	1	0	1	1	33.69	0.00852988	0	40.2056	4	2	429.276	857.545	-0.572321	132.72	15732	15732	MS2	7/66	170307_chiba_PAF15_02.raw
	High	CAAGEDIITLR	Unambiguous	1	1	NP_001082364.1		CID	1	0	1	1	33.66	0.00684537	0	47.0847	8	2	581.3	1161.59	0.111991	154.386	18421	18421	MS2	7/88	170307_chiba_PAF15_02.raw
	High	MPSGEFAR	Unambiguous	4	2	NP_001081011.1;NP_001082364.1		CID	1	0	1	1	33.65	0.0023302	0	20.4284	0	2	447.71	894.413	-0.961339	46.6503	3713	3713	MS2	7/60	170307_chiba_PAF15_02.raw
	High	LVQGSILK	Unambiguous	4	2	NP_001081011.1;NP_001082364.1		CID	1	0	1	1	33.64	0.00862865	0	39.0304	0	2	429.276	857.545	-0.999367	49.1031	4091	4091	MS2	7/66	170307_chiba_PAF15_02.raw
	High	LSQTSNVDKEEEAVTIEMNEPVQLTFALR	Unambiguous	4	2	NP_001081011.1;NP_001082364.1		CID	1	0	1	1	33.59	0.0034783	1	46.4041	0	2	1646.32	3291.64	-0.316815	98.9985	11233	11233	MS2	11/322	170307_chiba_PAF15_02.raw
	High	MPSGEFAR	Unambiguous	4	2	NP_001081011.1;NP_001082364.1		CID	1	0	1	1	33.47	0.0024513	0	19.0697	21	2	447.71	894.414	-0.210694	152.193	18180	18180	MS2	11/60	170307_chiba_PAF15_02.raw
	High	LMDLDVEQLGIPEQEYSCVIK	Unambiguous	4	2	NP_001081011.1;NP_001082364.1		CID	1	0	1	1	33.41	0.0061565	0	51.0708	3	2	1211.6	2422.19	1.0652	129.38	15291	15291	MS2	15/214	170307_chiba_PAF15_02.raw
	High	ATPLSPTVILSMSADIPLVVEYK	Unambiguous	3	2	NP_001081011.1;NP_001082364.1		CID	1	0	1	1	33.41	0.00337467	0	13.0705	0	3	815.45	2444.34	-0.275797	132.134	15655	15655	MS2	13/214	170307_chiba_PAF15_02.raw
	High	VLEALKDLIDEACWDITSSGISLQSMDSSHVSLVQLTLR	Unambiguous	4	2	NP_001081011.1;NP_001082364.1		CID	1	0	1	1	33.33	0.0023458	1	15.1107	26	3	1425.06	4273.18	1.29993	150.222	17956	17956	MS2	7/438	170307_chiba_PAF15_02.raw
	High	LSQTSNVDKEEEAVTIEMNEPVQLTFALR	Unambiguous	4	2	NP_001081011.1;NP_001082364.1		CID	1	0	1	1	33.29	0.00377395	1	4.11233	0	3	1097.89	3291.64	-0.0798481	98.4714	11161	11161	MS2	26/322	170307_chiba_PAF15_02.raw
	High	LVQGSILK	Unambiguous	4	2	NP_001081011.1;NP_001082364.1		CID	1	0	1	1	33.25	0.00943937	0	30.768	4	2	429.276	857.545	-0.21645	138.149	16449	16449	MS2	11/66	170307_chiba_PAF15_02.raw
	High	LVQGSILK	Unambiguous	4	2	NP_001081011.1;NP_001082364.1		CID	1	0	1	1	33.24	0.00922401	0	40.2647	0	2	429.276	857.544	-1.92464	46.6189	3708	3708	MS2	7/66	170307_chiba_PAF15_02.raw
	High	YLNFFTK	Unambiguous	4	2	NP_001081011.1;NP_001082364.1		CID	1	0	1	1	33.21	0.0125351	0	0	2	2	466.747	932.486	-1.62975	120.067	14053	14053	MS2	6/56	170307_chiba_PAF15_02.raw
	High	ATPLSPTVILSMSADIPLVVEYK	Unambiguous	3	2	NP_001081011.1;NP_001082364.1		CID	1	0	1	1	33.02	0.00391624	0	4.85699	0	3	815.45	2444.34	0.248574	126.605	14920	14920	MS2	15/214	170307_chiba_PAF15_02.raw
	High	LVQGSILK	Unambiguous	4	2	NP_001081011.1;NP_001082364.1		CID	1	0	1	1	33.01	0.00997569	0	11.0103	3	2	429.276	857.545	-0.928193	133.203	15797	15797	MS2	7/66	170307_chiba_PAF15_02.raw
	High	LVQGSILK	Unambiguous	4	2	NP_001081011.1;NP_001082364.1		CID	1	0	1	1	32.99	0.0100217	0	15.4931	2	2	429.276	857.544	-1.42641	103.972	11905	11905	MS2	5/66	170307_chiba_PAF15_02.raw
	High	ATPLSPTVILSMSADIPLVVEYK	Unambiguous	3	2	NP_001081011.1;NP_001082364.1		CID	1	0	1	1	32.93	0.00376905	0	11.2937	4	3	815.45	2444.34	-0.275797	153.043	18273	18273	MS2	7/214	170307_chiba_PAF15_02.raw
	High	YLNFFTK	Unambiguous	4	2	NP_001081011.1;NP_001082364.1		CID	1	0	1	1	32.84	0.00876193	0	0	1	2	466.747	932.487	-0.844296	84.5521	9257	9257	MS2	10/56	170307_chiba_PAF15_02.raw
	High	SDGFDTYR	Unambiguous	4	2	NP_001081011.1;NP_001082364.1		CID	1	0	1	1	32.79	0.000841628	0	40.1967	1	2	480.706	960.405	-0.733445	47.6166	3864	3864	MS2	5/66	170307_chiba_PAF15_02.raw
	High	LMDLDVEQLGIPEQEYSCVIK	Unambiguous	4	2	NP_001081011.1;NP_001082364.1		CID	1	0	1	1	32.63	0.00796806	0	16.2081	0	3	808.067	2422.19	-0.301058	102.698	11733	11733	MS2	13/214	170307_chiba_PAF15_02.raw
	High	LMDLDVEQLGIPEQEYSCVIK	Unambiguous	4	2	NP_001081011.1;NP_001082364.1		CID	1	0	1	1	32.56	0.00809754	0	9.88234	1	3	808.067	2422.19	-0.225463	143.899	17207	17207	MS2	16/214	170307_chiba_PAF15_02.raw
	High	DLIDEACWDITSSGISLQSMDSSHVSLVQLTLR	Unambiguous	4	2	NP_001081011.1;NP_001082364.1		CID	1	0	1	1	32.55	0.00569802	0	20.5145	29	3	1207.26	3619.76	-1.36697	153.95	18371	18371	MS2	28/346	170307_chiba_PAF15_02.raw
	High	LMDLDVEQLGIPEQEYSCVIK	Unambiguous	4	2	NP_001081011.1;NP_001082364.1		CID	1	0	1	1	32.54	0.00816277	0	16.8426	1	2	1211.6	2422.19	-0.345903	105.972	12176	12176	MS2	9/214	170307_chiba_PAF15_02.raw
	High	SDGFDTYR	Unambiguous	4	2	NP_001081011.1;NP_001082364.1		CID	1	0	1	1	32.36	0.000929223	0	54.0106	0	2	480.706	960.405	-0.733445	46.532	3695	3695	MS2	7/66	170307_chiba_PAF15_02.raw
	High	YLNFFTK	Unambiguous	4	2	NP_001081011.1;NP_001082364.1		CID	1	0	1	1	32.26	0.0100138	0	0	2	2	466.747	932.487	-0.975205	124.988	14705	14705	MS2	6/56	170307_chiba_PAF15_02.raw
	High	LMDLDVEQLGIPEQEYSCVIK	Unambiguous	4	2	NP_001081011.1;NP_001082364.1		CID	1	0	1	1	32.14	0.00760623	0	47.136	2	2	1211.6	2422.19	1.56917	117.39	13697	13697	MS2	7/214	170307_chiba_PAF15_02.raw
	High	MPSGEFAR	Unambiguous	4	2	NP_001081011.1;NP_001082364.1		CID	1	0	1	1	32.12	0.00331431	0	8.04314	11	2	447.71	894.413	-1.02958	145.56	17421	17421	MS2	7/60	170307_chiba_PAF15_02.raw
	High	LVQGSILK	Unambiguous	4	2	NP_001081011.1;NP_001082364.1		CID	1	0	1	1	31.88	0.0129403	0	38.1005	3	2	429.276	857.545	-0.999367	131.286	15542	15542	MS2	7/66	170307_chiba_PAF15_02.raw
	High	YLNFFTK	Unambiguous	4	2	NP_001081011.1;NP_001082364.1		CID	1	0	1	1	31.88	0.0109295	0	29.9354	0	2	466.747	932.487	-0.90975	72.1173	7490	7490	MS2	6/56	170307_chiba_PAF15_02.raw
	High	LSQTSNVDKEEEAVTIEMNEPVQLTFALR	Unambiguous	4	2	NP_001081011.1;NP_001082364.1		CID	1	0	1	1	31.86	0.0045614	1	4.6487	0	3	1097.89	3291.64	0.0314067	101.577	11581	11581	MS2	27/322	170307_chiba_PAF15_02.raw
	High	YLNFFTK	Unambiguous	4	2	NP_001081011.1;NP_001082364.1		CID	1	0	1	1	31.58	0.0117112	0	20.1643	0	2	466.747	932.487	-1.04066	78.3204	8374	8374	MS2	9/56	170307_chiba_PAF15_02.raw
	High	LVQGSILK	Unambiguous	4	2	NP_001081011.1;NP_001082364.1		CID	1	0	1	1	31.4	0.0144525	0	13.4963	3	2	429.276	857.545	-0.999367	127.494	15040	15040	MS2	6/66	170307_chiba_PAF15_02.raw
	High	LVQGSILK	Unambiguous	4	2	NP_001081011.1;NP_001082364.1		CID	1	0	1	1	31.36	0.0145862	0	16.7586	3	2	429.276	857.545	-0.572321	123.574	14518	14518	MS2	5/66	170307_chiba_PAF15_02.raw
	High	AEDNADTVTMVFESPNQEK	Unambiguous	4	2	NP_001081011.1;NP_001082364.1		CID	1	0	1	1	31.26	0.0035164	0	35.3941	4	2	1062.97	2124.94	-0.391202	93.1552	10444	10444	MS2	19/206	170307_chiba_PAF15_02.raw
	High	ATPLSPTVILSMSADIPLVVEYK	Unambiguous	3	2	NP_001081011.1;NP_001082364.1		CID	1	0	1	1	31.16	0.00600993	0	2.81993	0	3	815.451	2444.34	0.772944	142.466	17017	17017	MS2	14/214	170307_chiba_PAF15_02.raw
	High	LMDLDVEQLGIPEQEYSCVIK	Unambiguous	4	2	NP_001081011.1;NP_001082364.1		CID	1	0	1	1	30.92	0.0110442	0	43.6229	3	2	1211.6	2422.19	0.863617	131.123	15520	15520	MS2	11/214	170307_chiba_PAF15_02.raw
	High	YLNFFTK	Unambiguous	4	2	NP_001081011.1;NP_001082364.1		CID	1	0	1	1	30.85	0.021995	0	9.03058	17	2	466.748	932.489	0.922965	146.983	17594	17594	MS2	9/56	170307_chiba_PAF15_02.raw
	High	VSDYEMK	Unambiguous	4	2	NP_001081011.1;NP_001082364.1		CID	1	0	1	1	30.82	0.0042639	0	45.397	0	2	436.196	871.385	-1.59611	43.3079	3192	3192	MS2	6/54	170307_chiba_PAF15_02.raw
	High	LVQGSILK	Unambiguous	4	2	NP_001081011.1;NP_001082364.1		CID	1	0	1	1	30.67	0.0170979	0		1	2	429.276	857.545	-1.14172	64.9313	6474	6474	MS2	6/66	170307_chiba_PAF15_02.raw
	High	LMDLDVEQLGIPEQEYSCVIK	Unambiguous	4	2	NP_001081011.1;NP_001082364.1		CID	1	0	1	1	30.59	0.012789	0	33.6501	0	2	1211.6	2422.19	-0.446697	101.119	11519	11519	MS2	8/214	170307_chiba_PAF15_02.raw
	High	MPSGEFAR	Unambiguous	4	2	NP_001081011.1;NP_001082364.1		CID	1	0	1	1	30.53	0.00469111	0	0	5	2	447.711	894.414	0.0622679	144.327	17264	17264	MS2	7/60	170307_chiba_PAF15_02.raw
	High	LVQGSILK	Unambiguous	4	2	NP_001081011.1;NP_001082364.1		CID	1	0	1	1	30.34	0.0184477	0	44.3402	1	2	429.276	857.545	-0.71467	59.3572	5648	5648	MS2	6/66	170307_chiba_PAF15_02.raw
	High	LVQGSILK	Unambiguous	4	2	NP_001081011.1;NP_001082364.1		CID	1	0	1	1	30.34	0.0184477	0	29.4891	1	2	429.276	857.545	-0.358798	59.198	5625	5625	MS2	6/66	170307_chiba_PAF15_02.raw
	High	LMDLDVEQLGIPEQEYSCVIK	Unambiguous	4	2	NP_001081011.1;NP_001082364.1		CID	1	0	1	1	30.34	0.012992	0	24.9999	1	3	808.068	2422.19	0.379298	107.404	12367	12367	MS2	14/214	170307_chiba_PAF15_02.raw
	High	LMDLDVEQLGIPEQEYSCVIK	Unambiguous	4	2	NP_001081011.1;NP_001082364.1		CID	1	0	1	1	30.32	0.0137023	0	3.97811	0	3	808.068	2422.19	0.228108	96.1686	10848	10848	MS2	13/214	170307_chiba_PAF15_02.raw
	High	MPSGEFAR	Unambiguous	4	2	NP_001081011.1;NP_001082364.1		CID	1	0	1	1	30.29	0.00495765	0	19.253	6	2	447.711	894.414	0.40347	144.139	17239	17239	MS2	7/60	170307_chiba_PAF15_02.raw
	High	DLIDEACWDITSSGISLQSMDSSHVSLVQLTLR	Unambiguous	4	2	NP_001081011.1;NP_001082364.1		CID	1	0	1	1	30.29	0.0101492	0	5.40494	0	3	1207.26	3619.76	-0.355271	127.692	15067	15067	MS2	19/346	170307_chiba_PAF15_02.raw
	High	ATPLSPTVILSMSADIPLVVEYK	Unambiguous	3	2	NP_001081011.1;NP_001082364.1		CID	1	0	1	1	30.22	0.00746225	0	5.46644	3	3	815.451	2444.34	0.548214	152.289	18191	18191	MS2	24/214	170307_chiba_PAF15_02.raw
	High	LVQGSILK	Unambiguous	4	2	NP_001081011.1;NP_001082364.1		CID	1	0	1	1	30.18	0.01914	0	31.8233	2	2	429.276	857.545	-0.999367	127.675	15065	15065	MS2	7/66	170307_chiba_PAF15_02.raw
	High	LMDLDVEQLGIPEQEYSCVIK	Unambiguous	4	2	NP_001081011.1;NP_001082364.1		CID	1	0	1	1	30.15	0.0140077	0	9.96729	19	3	808.067	2422.19	-0.603438	151.83	18139	18139	MS2	15/214	170307_chiba_PAF15_02.raw
	High	LMDLDVEQLGIPEQEYSCVIK	Unambiguous	4	2	NP_001081011.1;NP_001082364.1		CID	1	0	1	1	30.13	0.014218	0	2.94641	0	3	808.067	2422.19	-0.376653	93.8094	10532	10532	MS2	16/214	170307_chiba_PAF15_02.raw
	High	LMDLDVEQLGIPEQEYSCVIK	Unambiguous	4	2	NP_001081011.1;NP_001082364.1		CID	1	0	1	1	30.11	0.0142836	0	34.9758	2	2	1211.6	2422.19	-0.345903	130.44	15430	15430	MS2	11/214	170307_chiba_PAF15_02.raw
	High	MPSGEFAR	Unambiguous	4	2	NP_001081011.1;NP_001082364.1		CID	1	0	1	1	30.04	0.00465691	0	33.5629	4	2	447.71	894.413	-0.551896	137.686	16388	16388	MS2	6/60	170307_chiba_PAF15_02.raw
	High	SDGFDTYR	Unambiguous	4	2	NP_001081011.1;NP_001082364.1		CID	1	0	1	1	30.01	0.000995337	0	60.5527	1	2	480.707	960.406	0.092724	47.8698	3901	3901	MS2	7/66	170307_chiba_PAF15_02.raw
	High	LMDLDVEQLGIPEQEYSCVIK	Unambiguous	4	2	NP_001081011.1;NP_001082364.1		CID	1	0	1	1	29.86	0.0148201	0	11.6939	0	3	808.068	2422.19	0.00132273	105.207	12073	12073	MS2	19/214	170307_chiba_PAF15_02.raw
	High	MPSGEFAR	Unambiguous	4	2	NP_001081011.1;NP_001082364.1		CID	1	0	1	1	29.8	0.00565449	0	21.078	0	2	447.71	894.413	-1.16606	46.207	3645	3645	MS2	7/60	170307_chiba_PAF15_02.raw
	High	ATPLSPTVILSMSADIPLVVEYK	Unambiguous	3	2	NP_001081011.1;NP_001082364.1		CID	1	0	1	1	29.72	0.00789281	0	10.2232	0	3	815.45	2444.33	-0.500527	137.703	16390	16390	MS2	16/214	170307_chiba_PAF15_02.raw
	High	LMDLDVEQLGIPEQEYSCVIK	Unambiguous	4	2	NP_001081011.1;NP_001082364.1		CID	1	0	1	1	29.63	0.0159528	0	22.2878	26	3	808.067	2422.19	-0.376653	152.769	18244	18244	MS2	17/214	170307_chiba_PAF15_02.raw
	High	LSQTSNVDKEEEAVTIEMNEPVQLTFALR	Unambiguous	4	2	NP_001081011.1;NP_001082364.1		CID	1	0	1	1	29.61	0.00869695	1	4.08445	0	3	1097.89	3291.64	-0.302358	109.393	12631	12631	MS2	10/322	170307_chiba_PAF15_02.raw
	High	LMDLDVEQLGIPEQEYSCVIK	Unambiguous	4	2	NP_001081011.1;NP_001082364.1		CID	1	0	1	1	29.57	0.0151259	0	27.098	2	2	1211.6	2422.19	0.762824	116.672	13602	13602	MS2	12/214	170307_chiba_PAF15_02.raw
	High	MPSGEFAR	Unambiguous	4	2	NP_001081011.1;NP_001082364.1		CID	1	0	1	1	29.45	0.00601556	0	25.8587	5	2	447.711	894.414	0.266989	154.372	18419	18419	MS2	7/60	170307_chiba_PAF15_02.raw
	High	LMDLDVEQLGIPEQEYSCVIK	Unambiguous	4	2	NP_001081011.1;NP_001082364.1		CID	1	0	1	1	29.4	0.0156723	0	8.20896	7	3	808.068	2422.19	0.832868	147.627	17672	17672	MS2	16/214	170307_chiba_PAF15_02.raw
	High	MPSGEFAR	Unambiguous	4	2	NP_001081011.1;NP_001082364.1		CID	1	0	1	1	29.24	0.00952994	0	10.4353	0	2	447.709	894.411	-2.87208	47.4407	3837	3837	MS2	6/60	170307_chiba_PAF15_02.raw
	High	YLNFFTK	Unambiguous	4	2	NP_001081011.1;NP_001082364.1		CID	1	0	1	1	29.22	0.0183101	0	44.0079	17	2	466.747	932.488	0.0720623	150.567	17992	17992	MS2	5/56	170307_chiba_PAF15_02.raw
	High	YLNFFTK	Unambiguous	4	2	NP_001081011.1;NP_001082364.1		CID	1	0	1	1	28.88	0.0218072	0	32.2237	1	2	466.747	932.487	-0.713388	85.3886	9374	9374	MS2	6/56	170307_chiba_PAF15_02.raw
	High	LVQGSILK	Unambiguous	4	2	NP_001081011.1;NP_001082364.1		CID	1	0	1	1	28.82	0.0261784	0	52.2111	1	2	429.276	857.545	-0.643495	54.1316	4870	4870	MS2	6/66	170307_chiba_PAF15_02.raw
	High	YLNFFTK	Unambiguous	4	2	NP_001081011.1;NP_001082364.1		CID	1	0	1	1	28.75	0.0204029	0	0	1	2	466.747	932.487	-0.517025	83.009	9035	9035	MS2	6/56	170307_chiba_PAF15_02.raw
	High	MPSGEFAR	Unambiguous	4	2	NP_001081011.1;NP_001082364.1		CID	1	0	1	1	28.62	0.0190992	0	33.1433	15	2	447.711	894.416	1.90475	146.404	17523	17523	MS2	10/60	170307_chiba_PAF15_02.raw
	High	LMDLDVEQLGIPEQEYSCVIK	Unambiguous	4	2	NP_001081011.1;NP_001082364.1		CID	1	0	1	1	28.43	0.0203122	0	22.6443	1	3	808.068	2422.19	-0.0742723	129.664	15328	15328	MS2	13/214	170307_chiba_PAF15_02.raw
	High	LMDLDVEQLGIPEQEYSCVIK	Unambiguous	4	2	NP_001081011.1;NP_001082364.1		CID	1	0	1	1	28.04	0.0225347	0	40.0514	1	3	808.068	2422.19	0.00132273	128.898	15227	15227	MS2	14/214	170307_chiba_PAF15_02.raw
	High	LVQGSILK	Unambiguous	4	2	NP_001081011.1;NP_001082364.1		CID	1	0	1	1	27.89	0.0308854	0	47.9739	2	2	429.277	857.546	0.352944	57.679	5402	5402	MS2	6/66	170307_chiba_PAF15_02.raw
	High	AEDNADTVTMVFESPNQEK	Unambiguous	4	2	NP_001081011.1;NP_001082364.1		CID	1	0	1	1	27.88	0.00668011	0	52.242	1	3	708.985	2124.94	0.521614	77.9565	8323	8323	MS2	17/206	170307_chiba_PAF15_02.raw
	High	LMDLDVEQLGIPEQEYSCVIK	Unambiguous	4	2	NP_001081011.1;NP_001082364.1		CID	1	0	1	1	27.88	0.0230545	0	22.0385	0	3	808.068	2422.19	-0.0742723	99.2692	11269	11269	MS2	15/214	170307_chiba_PAF15_02.raw
	High	AEDNADTVTMVFESPNQEK	Unambiguous	4	2	NP_001081011.1;NP_001082364.1		CID	1	0	1	1	27.72	0.00667724	0	11.2244	0	3	708.984	2124.94	-1.02944	72.5842	7555	7555	MS2	16/206	170307_chiba_PAF15_02.raw
	High	LMDLDVEQLGIPEQEYSCVIK	Unambiguous	4	2	NP_001081011.1;NP_001082364.1		CID	1	0	1	1	27.63	0.0251972	0	54.4232	1	3	808.067	2422.19	-0.679033	111.15	12866	12866	MS2	11/214	170307_chiba_PAF15_02.raw
	High	LMDLDVEQLGIPEQEYSCVIK	Unambiguous	4	2	NP_001081011.1;NP_001082364.1		CID	1	0	1	1	27.33	0.0233932	0	19.112	1	3	808.068	2422.19	0.606083	138.546	16501	16501	MS2	12/214	170307_chiba_PAF15_02.raw
	High	YLNFFTK	Unambiguous	4	2	NP_001081011.1;NP_001082364.1		CID	1	0	1	1	27.23	0.0289529	0	28.9123	2	2	466.747	932.487	-0.386117	92.3831	10339	10339	MS2	4/56	170307_chiba_PAF15_02.raw
	High	LMDLDVEQLGIPEQEYSCVIK	Unambiguous	4	2	NP_001081011.1;NP_001082364.1		CID	1	0	1	1	27.1	0.0246655	0	48.7683	2	2	1211.6	2422.19	0.561238	116.05	13519	13519	MS2	10/214	170307_chiba_PAF15_02.raw
	High	YLNFFTK	Unambiguous	4	2	NP_001081011.1;NP_001082364.1		CID	1	0	1	1	26.74	0.055607	0	19.0588	1	2	466.747	932.486	-1.6952	81.1782	8779	8779	MS2	6/56	170307_chiba_PAF15_02.raw
NP_001081011.1	proliferating cell nuclear antigen [Xenopus laevis]	45695.6	83.14	3	1	18	952	261	28.8063	4.65283
	Confidence Level	Sequence	PSM Ambiguity	# Proteins	# Protein Groups	Protein Group Accessions	Modifications	Activation Type	ΔScore	ΔCn	Rank	Search Engine Rank	IonScore	Exp Value	# Missed Cleavages	Isolation Interference [%]	Ion Inject Time [ms]	Charge	m/z [Da]	MH+ [Da]	ΔM [ppm]	RT [min]	First Scan	Last Scan	MS Order	Ions Matched	Spectrum File
	High	AEDNADTVTMVFESPNQEK	Unambiguous	4	2	NP_001081011.1;NP_001082364.1		CID	1	0	1	1	143.61	1.85093e-14	0	16.7245	1	2	1062.97	2124.94	-0.620988	77.6052	8273	8273	MS2	14/206	170307_chiba_PAF15_02.raw
	High	ATPLSPTVILSMSADIPLVVEYK	Unambiguous	3	2	NP_001081011.1;NP_001082364.1		CID	1	0	1	1	129.75	8.26218e-13	0	5.69096	0	2	1222.67	2444.34	0.478805	130.396	15424	15424	MS2	15/214	170307_chiba_PAF15_02.raw
	High	ATPLSPTVILSMSADIPLVVEYK	Unambiguous	3	2	NP_001081011.1;NP_001082364.1		CID	1	0	1	1	127.68	1.33074e-12	0	10.1141	5	2	1222.67	2444.34	0.279045	154.364	18418	18418	MS2	14/214	170307_chiba_PAF15_02.raw
	High	DLSQIGDAVVISCAK	Unambiguous	4	2	NP_001081011.1;NP_001082364.1		CID	1	0	1	1	127	3.13256e-12	0	4.18968	0	2	759.895	1518.78	-0.194048	85.4053	9376	9376	MS2	20/156	170307_chiba_PAF15_02.raw
	High	DLSQIGDAVVISCAK	Unambiguous	4	2	NP_001081011.1;NP_001082364.1		CID	1	0	1	1	125.6	3.77329e-12	0	6.35047	0	2	759.895	1518.78	-0.917413	87.4108	9650	9650	MS2	20/156	170307_chiba_PAF15_02.raw
	High	DLSQIGDAVVISCAK	Unambiguous	4	2	NP_001081011.1;NP_001082364.1		CID	1	0	1	1	124.7	4.64216e-12	0	3.42443	0	2	759.895	1518.78	-0.917413	86.1886	9481	9481	MS2	11/156	170307_chiba_PAF15_02.raw
	High	DLSQIGDAVVISCAK	Unambiguous	4	2	NP_001081011.1;NP_001082364.1		CID	1	0	1	1	124.64	5.73742e-12	0	4.57198	0	2	759.895	1518.78	0.127447	84.5055	9250	9250	MS2	11/156	170307_chiba_PAF15_02.raw
	High	DLSQIGDAVVISCAK	Unambiguous	4	2	NP_001081011.1;NP_001082364.1		CID	1	0	1	1	123.61	6.79399e-12	0	14.6952	0	2	759.894	1518.78	-1.31928	86.6482	9544	9544	MS2	23/156	170307_chiba_PAF15_02.raw
	High	ATPLSPTVILSMSADIPLVVEYK	Unambiguous	3	2	NP_001081011.1;NP_001082364.1		CID	1	0	1	1	120.48	6.89431e-12	0	5.51287	4	2	1222.67	2444.34	0.878325	150.264	17960	17960	MS2	12/214	170307_chiba_PAF15_02.raw
	High	DLSQIGDAVVISCAK	Unambiguous	4	2	NP_001081011.1;NP_001082364.1		CID	1	0	1	1	119.89	1.61027e-11	0	10.7159	0	2	759.895	1518.78	-0.194048	89.9773	10008	10008	MS2	20/156	170307_chiba_PAF15_02.raw
	High	FSASGELGTGNVK	Unambiguous	4	2	NP_001081011.1;NP_001082364.1		CID	1	0	1	1	119.7	1.57513e-11	0	12.1697	1	2	633.82	1266.63	0.0747321	132.002	15637	15637	MS2	11/114	170307_chiba_PAF15_02.raw
	High	FSASGELGTGNVK	Unambiguous	4	2	NP_001081011.1;NP_001082364.1		CID	1	0	1	1	119.52	1.69205e-11	0	16.5162	1	2	633.82	1266.63	-0.118016	116.195	13539	13539	MS2	11/114	170307_chiba_PAF15_02.raw
	High	AEDNADTVTMVFESPNQEK	Unambiguous	4	2	NP_001081011.1;NP_001082364.1		CID	1	0	1	1	114.55	1.4907e-11	0	0	1	2	1062.97	2124.94	-0.735881	75.4338	7956	7956	MS2	23/206	170307_chiba_PAF15_02.raw
	High	FSASGELGTGNVK	Unambiguous	4	2	NP_001081011.1;NP_001082364.1		CID	1	0	1	1	114.41	6.84639e-11	0	5.92992	2	2	633.82	1266.63	0.363854	138.361	16477	16477	MS2	10/114	170307_chiba_PAF15_02.raw
	High	AEDNADTVTMVFESPNQEK	Unambiguous	4	2	NP_001081011.1;NP_001082364.1		CID	1	0	1	1	114.29	1.75024e-11	0	28.6635	1	2	1062.97	2124.94	-0.506095	84.7337	9283	9283	MS2	23/206	170307_chiba_PAF15_02.raw
	High	AEDNADTVTMVFESPNQEK	Unambiguous	4	2	NP_001081011.1;NP_001082364.1		CID	1	0	1	1	114.22	1.58946e-11	0	34.9795	38	2	1062.97	2124.94	0.183263	150.745	18013	18013	MS2	23/206	170307_chiba_PAF15_02.raw
	High	ATPLSPTVILSMSADIPLVVEYK	Unambiguous	3	2	NP_001081011.1;NP_001082364.1		CID	1	0	1	1	113.73	3.17732e-11	0	4.34117	0	2	1222.67	2444.34	-0.120475	124.871	14689	14689	MS2	12/214	170307_chiba_PAF15_02.raw
	High	ATPLSPTVILSMSADIPLVVEYK	Unambiguous	3	2	NP_001081011.1;NP_001082364.1		CID	1	0	1	1	113.4	3.56529e-11	0	7.38924	0	2	1222.67	2444.34	0.478805	124.077	14584	14584	MS2	12/214	170307_chiba_PAF15_02.raw
	High	DLSQIGDAVVISCAK	Unambiguous	4	2	NP_001081011.1;NP_001082364.1		CID	1	0	1	1	112.89	8.35321e-11	0	8.82855	0	2	759.895	1518.78	-0.515543	88.1768	9756	9756	MS2	11/156	170307_chiba_PAF15_02.raw
	High	FSASGELGTGNVK	Unambiguous	4	2	NP_001081011.1;NP_001082364.1		CID	1	0	1	1	112.1	8.04656e-11	0	0	10	2	633.82	1266.63	-0.503512	153.691	18341	18341	MS2	11/114	170307_chiba_PAF15_02.raw
	High	DLSQIGDAVVISCAK	Unambiguous	4	2	NP_001081011.1;NP_001082364.1		CID	1	0	1	1	111.17	1.04646e-10	0	5.51093	0	2	759.895	1518.78	-0.837039	83.9459	9168	9168	MS2	19/156	170307_chiba_PAF15_02.raw
	High	ATPLSPTVILSMSADIPLVVEYK	Unambiguous	3	2	NP_001081011.1;NP_001082364.1		CID	1	0	1	1	110.91	6.3255e-11	0	7.058	0	2	1222.67	2444.34	0.378925	126.449	14899	14899	MS2	14/214	170307_chiba_PAF15_02.raw
	High	ATPLSPTVILSMSADIPLVVEYK	Unambiguous	3	2	NP_001081011.1;NP_001082364.1		CID	1	0	1	1	110.86	6.31671e-11	0	14.243	18	2	1222.67	2444.34	0.878325	152.434	18207	18207	MS2	14/214	170307_chiba_PAF15_02.raw
	High	AEDNADTVTMVFESPNQEK	Unambiguous	4	2	NP_001081011.1;NP_001082364.1		CID	1	0	1	1	110.84	3.91466e-11	0	3.91385	1	2	1062.97	2124.94	-0.276309	76.7476	8148	8148	MS2	22/206	170307_chiba_PAF15_02.raw
	High	ATPLSPTVILSMSADIPLVVEYK	Unambiguous	3	2	NP_001081011.1;NP_001082364.1		CID	1	0	1	1	110.68	6.66952e-11	0	10.4685	0	2	1222.67	2444.34	0.378925	142.006	16957	16957	MS2	14/214	170307_chiba_PAF15_02.raw
	High	ATPLSPTVILSMSADIPLVVEYK	Unambiguous	3	2	NP_001081011.1;NP_001082364.1		CID	1	0	1	1	110.53	6.9039e-11	0	5.27302	0	2	1222.67	2444.34	0.378925	138.823	16538	16538	MS2	14/214	170307_chiba_PAF15_02.raw
	High	ATPLSPTVILSMSADIPLVVEYK	Unambiguous	3	2	NP_001081011.1;NP_001082364.1		CID	1	0	1	1	109.57	8.28059e-11	0	16.8898	0	2	1222.67	2444.34	-0.0205953	110.182	12737	12737	MS2	13/214	170307_chiba_PAF15_02.raw
	High	FSASGELGTGNVK	Unambiguous	4	2	NP_001081011.1;NP_001082364.1		CID	1	0	1	1	108.7	1.7604e-10	0	11.208	1	2	633.82	1266.63	-0.503512	133.583	15848	15848	MS2	11/114	170307_chiba_PAF15_02.raw
	High	FSASGELGTGNVK	Unambiguous	4	2	NP_001081011.1;NP_001082364.1		CID	1	0	1	1	108.44	1.86901e-10	0	9.58695	0	2	633.819	1266.63	-0.792634	60.3029	5788	5788	MS2	11/114	170307_chiba_PAF15_02.raw
	High	FSASGELGTGNVK	Unambiguous	4	2	NP_001081011.1;NP_001082364.1		CID	1	0	1	1	108.27	2.77766e-10	0	4.01444	10	2	633.821	1266.63	1.13484	149.883	17919	17919	MS2	10/114	170307_chiba_PAF15_02.raw
	High	FSASGELGTGNVK	Unambiguous	4	2	NP_001081011.1;NP_001082364.1		CID	1	0	1	1	108.13	2.4149e-10	0	13.7717	0	2	633.82	1266.63	-0.310764	71.3635	7386	7386	MS2	10/114	170307_chiba_PAF15_02.raw
	High	ATPLSPTVILSMSADIPLVVEYK	Unambiguous	3	2	NP_001081011.1;NP_001082364.1		CID	1	0	1	1	108.06	1.21926e-10	0	9.93825	18	2	1222.67	2444.33	-1.0194	153.211	18293	18293	MS2	12/214	170307_chiba_PAF15_02.raw
	High	ATPLSPTVILSMSADIPLVVEYK	Unambiguous	3	2	NP_001081011.1;NP_001082364.1		CID	1	0	1	1	108.04	1.22488e-10	0	6.82852	0	2	1222.67	2444.34	0.478805	131.98	15634	15634	MS2	15/214	170307_chiba_PAF15_02.raw
	High	ATPLSPTVILSMSADIPLVVEYK	Unambiguous	3	2	NP_001081011.1;NP_001082364.1		CID	1	0	1	1	107.93	9.90547e-11	0	6.86448	3	2	1222.67	2444.34	1.87712	147.75	17688	17688	MS2	14/214	170307_chiba_PAF15_02.raw
	High	ATPLSPTVILSMSADIPLVVEYK	Unambiguous	3	2	NP_001081011.1;NP_001082364.1		CID	1	0	1	1	107.91	1.24592e-10	0	4.47436	1	2	1222.67	2444.34	0.878325	146.032	17477	17477	MS2	14/214	170307_chiba_PAF15_02.raw
	High	ATPLSPTVILSMSADIPLVVEYK	Unambiguous	3	2	NP_001081011.1;NP_001082364.1		CID	1	0	1	1	107.91	1.24592e-10	0	6.9526	0	2	1222.67	2444.34	1.07809	140.416	16747	16747	MS2	14/214	170307_chiba_PAF15_02.raw
	High	ATPLSPTVILSMSADIPLVVEYK	Unambiguous	3	2	NP_001081011.1;NP_001082364.1		CID	1	0	1	1	107.85	1.24685e-10	0	4.82936	3	2	1222.67	2444.34	1.17797	148.652	17792	17792	MS2	14/214	170307_chiba_PAF15_02.raw
	High	ATPLSPTVILSMSADIPLVVEYK	Unambiguous	3	2	NP_001081011.1;NP_001082364.1		CID	1	0	1	1	107.4	1.42847e-10	0	5.57682	8	2	1222.67	2444.34	0.678565	152.567	18222	18222	MS2	14/214	170307_chiba_PAF15_02.raw
	High	FSASGELGTGNVK	Unambiguous	4	2	NP_001081011.1;NP_001082364.1		CID	1	0	1	1	107.17	2.84922e-10	0	2.90686	1	2	633.82	1266.63	-0.407138	135.183	16058	16058	MS2	11/114	170307_chiba_PAF15_02.raw
	High	FSASGELGTGNVK	Unambiguous	4	2	NP_001081011.1;NP_001082364.1		CID	1	0	1	1	107.17	2.90678e-10	0	18.8189	2	2	633.82	1266.63	-0.21439	143.162	17108	17108	MS2	11/114	170307_chiba_PAF15_02.raw
	High	FSASGELGTGNVK	Unambiguous	4	2	NP_001081011.1;NP_001082364.1		CID	1	0	1	1	107.06	3.93577e-10	0	8.63923	10	2	633.82	1266.63	0.942096	148.275	17751	17751	MS2	11/114	170307_chiba_PAF15_02.raw
	High	LSQTSNVDKEEEAVTIEMNEPVQLTFALR	Unambiguous	4	2	NP_001081011.1;NP_001082364.1		CID	1	0	1	1	105.75	2.50108e-10	1	28.0183	0	2	1646.33	3291.65	1.6116	90.9443	10141	10141	MS2	13/322	170307_chiba_PAF15_02.raw
	High	FSASGELGTGNVK	Unambiguous	4	2	NP_001081011.1;NP_001082364.1		CID	1	0	1	1	105.65	4.04321e-10	0	7.90926	2	2	633.82	1266.63	-0.407138	154.524	18440	18440	MS2	11/114	170307_chiba_PAF15_02.raw
	High	LSQTSNVDKEEEAVTIEMNEPVQLTFALR	Unambiguous	4	2	NP_001081011.1;NP_001082364.1		CID	1	0	1	1	105.64	1.92393e-10	1	50.7767	2	2	1646.33	3291.65	1.53743	108.722	12542	12542	MS2	13/322	170307_chiba_PAF15_02.raw
	High	FSASGELGTGNVK	Unambiguous	4	2	NP_001081011.1;NP_001082364.1		CID	1	0	1	1	105.49	3.68647e-10	0	8.05331	1	2	633.82	1266.63	-0.503512	128.044	15114	15114	MS2	11/114	170307_chiba_PAF15_02.raw
	High	LSQTSNVDKEEEAVTIEMNEPVQLTFALR	Unambiguous	4	2	NP_001081011.1;NP_001082364.1		CID	1	0	1	1	105.15	2.67306e-10	1	51.0496	1	2	1646.32	3291.64	-1.94856	96.9615	10957	10957	MS2	12/322	170307_chiba_PAF15_02.raw
	High	ATPLSPTVILSMSADIPLVVEYK	Unambiguous	3	2	NP_001081011.1;NP_001082364.1		CID	1	0	1	1	104.78	2.49495e-10	0	8.55716	0	2	1222.67	2444.34	0.0792848	128.007	15109	15109	MS2	14/214	170307_chiba_PAF15_02.raw
	High	FSASGELGTGNVK	Unambiguous	4	2	NP_001081011.1;NP_001082364.1		CID	1	0	1	1	104.71	5.12168e-10	0	7.98862	1	2	633.82	1266.63	-0.21439	130.419	15427	15427	MS2	11/114	170307_chiba_PAF15_02.raw
	High	DLSQIGDAVVISCAK	Unambiguous	4	2	NP_001081011.1;NP_001082364.1		CID	1	0	1	1	104.64	5.73742e-10	0	37.1101	11	2	759.896	1518.78	0.288194	147.107	17610	17610	MS2	11/156	170307_chiba_PAF15_02.raw
	High	ATPLSPTVILSMSADIPLVVEYK	Unambiguous	3	2	NP_001081011.1;NP_001082364.1		CID	1	0	1	1	104.54	2.70702e-10	0	8.15321	0	2	1222.67	2444.34	1.07809	138.022	16432	16432	MS2	14/214	170307_chiba_PAF15_02.raw
	High	FSASGELGTGNVK	Unambiguous	4	2	NP_001081011.1;NP_001082364.1		CID	1	0	1	1	104.34	5.4115e-10	0	9.85299	0	2	633.82	1266.63	0.0747321	60.036	5747	5747	MS2	11/114	170307_chiba_PAF15_02.raw
	High	DLSQIGDAVVISCAK	Unambiguous	4	2	NP_001081011.1;NP_001082364.1		CID	1	0	1	1	103.92	6.36648e-10	0	5.44802	0	2	759.895	1518.78	-0.194048	89.0851	9883	9883	MS2	19/156	170307_chiba_PAF15_02.raw
	High	FSASGELGTGNVK	Unambiguous	4	2	NP_001081011.1;NP_001082364.1		CID	1	0	1	1	103.29	8.20423e-10	0	17.8994	1	2	633.82	1266.63	0.171106	126.485	14904	14904	MS2	10/114	170307_chiba_PAF15_02.raw
	High	FSASGELGTGNVK	Unambiguous	4	2	NP_001081011.1;NP_001082364.1		CID	1	0	1	1	103.03	6.49547e-10	0	7.04257	1	2	633.82	1266.63	-0.503512	125.692	14798	14798	MS2	10/114	170307_chiba_PAF15_02.raw
	High	FSASGELGTGNVK	Unambiguous	4	2	NP_001081011.1;NP_001082364.1		CID	1	0	1	1	102.28	7.71988e-10	0	20.3733	1	2	633.819	1266.63	-0.889008	129.651	15326	15326	MS2	11/114	170307_chiba_PAF15_02.raw
	High	FSASGELGTGNVK	Unambiguous	4	2	NP_001081011.1;NP_001082364.1		CID	1	0	1	1	102.17	8.91902e-10	0	2.59182	7	2	633.82	1266.63	0.0747321	145.381	17398	17398	MS2	11/114	170307_chiba_PAF15_02.raw
	High	ATPLSPTVILSMSADIPLVVEYK	Unambiguous	3	2	NP_001081011.1;NP_001082364.1		CID	1	0	1	1	102.16	4.5002e-10	0	25.8887	2	2	1222.67	2444.34	-0.220356	108.671	12535	12535	MS2	13/214	170307_chiba_PAF15_02.raw
	High	FSASGELGTGNVK	Unambiguous	4	2	NP_001081011.1;NP_001082364.1		CID	1	0	1	1	102.09	9.17754e-10	0	10.6894	1	2	633.82	1266.63	-0.407138	132.778	15740	15740	MS2	11/114	170307_chiba_PAF15_02.raw
	High	FSASGELGTGNVK	Unambiguous	4	2	NP_001081011.1;NP_001082364.1		CID	1	0	1	1	102.06	1.08903e-09	0	7.74262	1	2	633.82	1266.63	0.171106	140.756	16792	16792	MS2	11/114	170307_chiba_PAF15_02.raw
	High	ATPLSPTVILSMSADIPLVVEYK	Unambiguous	3	2	NP_001081011.1;NP_001082364.1		CID	1	0	1	1	102.01	4.8472e-10	0	6.88185	0	2	1222.67	2444.34	0.878325	141.217	16852	16852	MS2	13/214	170307_chiba_PAF15_02.raw
	High	ATPLSPTVILSMSADIPLVVEYK	Unambiguous	3	2	NP_001081011.1;NP_001082364.1		CID	1	0	1	1	101.99	4.74309e-10	0	5.17591	0	2	1222.67	2444.34	-0.0205953	129.599	15319	15319	MS2	14/214	170307_chiba_PAF15_02.raw
	High	ATPLSPTVILSMSADIPLVVEYK	Unambiguous	3	2	NP_001081011.1;NP_001082364.1		CID	1	0	1	1	101.91	4.9601e-10	0	8.29966	1	2	1222.67	2444.34	0.878325	145.18	17372	17372	MS2	14/214	170307_chiba_PAF15_02.raw
	High	FSASGELGTGNVK	Unambiguous	4	2	NP_001081011.1;NP_001082364.1		CID	1	0	1	1	101.9	9.78166e-10	0	12.0217	1	2	633.82	1266.63	-0.21439	142.873	17070	17070	MS2	11/114	170307_chiba_PAF15_02.raw
	High	FSASGELGTGNVK	Unambiguous	4	2	NP_001081011.1;NP_001082364.1		CID	1	0	1	1	101.9	9.49112e-10	0	5.93309	0	2	633.82	1266.63	-0.0216418	59.0161	5598	5598	MS2	11/114	170307_chiba_PAF15_02.raw
	High	FSASGELGTGNVK	Unambiguous	4	2	NP_001081011.1;NP_001082364.1		CID	1	0	1	1	101.81	8.66814e-10	0	14.8806	0	2	633.819	1266.63	-1.37088	72.8812	7595	7595	MS2	11/114	170307_chiba_PAF15_02.raw
	High	FSASGELGTGNVK	Unambiguous	4	2	NP_001081011.1;NP_001082364.1		CID	1	0	1	1	101.8	8.62205e-10	0	8.18015	1	2	633.82	1266.63	-0.599886	134.356	15950	15950	MS2	11/114	170307_chiba_PAF15_02.raw
	High	AEDNADTVTMVFESPNQEK	Unambiguous	4	2	NP_001081011.1;NP_001082364.1		CID	1	0	1	1	101.8	3.13829e-10	0	41.9728	2	2	1062.97	2124.94	-0.161416	83.2813	9073	9073	MS2	13/206	170307_chiba_PAF15_02.raw
	High	DLSQIGDAVVISCAK	Unambiguous	4	2	NP_001081011.1;NP_001082364.1		CID	1	0	1	1	101.46	1.15391e-09	0	27.6086	13	2	759.896	1518.78	0.931184	147.93	17710	17710	MS2	11/156	170307_chiba_PAF15_02.raw
	High	ATPLSPTVILSMSADIPLVVEYK	Unambiguous	3	2	NP_001081011.1;NP_001082364.1		CID	1	0	1	1	101.27	6.08356e-10	0	6.99338	0	2	1222.67	2444.34	0.179165	127.228	15004	15004	MS2	11/214	170307_chiba_PAF15_02.raw
	High	ATPLSPTVILSMSADIPLVVEYK	Unambiguous	3	2	NP_001081011.1;NP_001082364.1		CID	1	0	1	1	101.08	6.08267e-10	0	7.67805	0	2	1222.67	2444.34	0.279045	139.629	16643	16643	MS2	11/214	170307_chiba_PAF15_02.raw
	High	ATPLSPTVILSMSADIPLVVEYK	Unambiguous	3	2	NP_001081011.1;NP_001082364.1		CID	1	0	1	1	101.05	5.88927e-10	0	9.35063	0	2	1222.67	2444.34	-0.120475	122.488	14374	14374	MS2	11/214	170307_chiba_PAF15_02.raw
	High	DLSQIGDAVVISCAK	Unambiguous	4	2	NP_001081011.1;NP_001082364.1		CID	1	0	1	1	100.62	1.36113e-09	0	38.8955	0	2	759.895	1518.78	-0.274422	104.414	11965	11965	MS2	11/156	170307_chiba_PAF15_02.raw
	High	FSASGELGTGNVK	Unambiguous	4	2	NP_001081011.1;NP_001082364.1		CID	1	0	1	1	100.14	1.43789e-09	0	13.0579	0	2	633.82	1266.63	-0.407138	93.2155	10452	10452	MS2	11/114	170307_chiba_PAF15_02.raw
	High	AEDNADTVTMVFESPNQEK	Unambiguous	4	2	NP_001081011.1;NP_001082364.1		CID	1	0	1	1	100.05	4.20135e-10	0	13.3013	1	2	1062.97	2124.94	-0.735881	84.89	9305	9305	MS2	22/206	170307_chiba_PAF15_02.raw
	High	AEDNADTVTMVFESPNQEK	Unambiguous	4	2	NP_001081011.1;NP_001082364.1		CID	1	0	1	1	99.9	5.26996e-10	0	30.2704	100	2	1062.97	2124.94	1.10241	151.758	18130	18130	MS2	15/206	170307_chiba_PAF15_02.raw
	High	FSASGELGTGNVK	Unambiguous	4	2	NP_001081011.1;NP_001082364.1		CID	1	0	1	1	99.86	1.80733e-09	0	11.2018	1	2	633.82	1266.63	0.26748	141.551	16896	16896	MS2	11/114	170307_chiba_PAF15_02.raw
	High	FSASGELGTGNVK	Unambiguous	4	2	NP_001081011.1;NP_001082364.1		CID	1	0	1	1	99.77	2.11932e-09	0	14.699	11	2	633.82	1266.63	0.845723	147.43	17649	17649	MS2	11/114	170307_chiba_PAF15_02.raw
	High	ATPLSPTVILSMSADIPLVVEYK	Unambiguous	3	2	NP_001081011.1;NP_001082364.1		CID	1	0	1	1	99.67	7.98421e-10	0	12.363	0	2	1222.67	2444.33	-0.420116	120.115	14059	14059	MS2	15/214	170307_chiba_PAF15_02.raw
	High	FSASGELGTGNVK	Unambiguous	4	2	NP_001081011.1;NP_001082364.1		CID	1	0	1	1	99.65	1.89687e-09	0	41.8838	3	2	633.82	1266.63	0.26748	143.913	17209	17209	MS2	11/114	170307_chiba_PAF15_02.raw
	High	FSASGELGTGNVK	Unambiguous	4	2	NP_001081011.1;NP_001082364.1		CID	1	0	1	1	99.64	1.64593e-09	0	17.6574	1	2	633.82	1266.63	-0.118016	128.824	15217	15217	MS2	11/114	170307_chiba_PAF15_02.raw
	High	ATPLSPTVILSMSADIPLVVEYK	Unambiguous	3	2	NP_001081011.1;NP_001082364.1		CID	1	0	1	1	99.6	8.55253e-10	0	9.01992	8	2	1222.67	2444.34	0.478805	151.821	18138	18138	MS2	15/214	170307_chiba_PAF15_02.raw
	High	FSASGELGTGNVK	Unambiguous	4	2	NP_001081011.1;NP_001082364.1		CID	1	0	1	1	99.53	2.09487e-09	0	7.19613	1	2	633.821	1266.63	1.03847	139.162	16582	16582	MS2	11/114	170307_chiba_PAF15_02.raw
	High	FSASGELGTGNVK	Unambiguous	4	2	NP_001081011.1;NP_001082364.1		CID	1	0	1	1	99.48	1.47099e-09	0	1.50315	1	2	633.82	1266.63	-0.503512	135.969	16161	16161	MS2	11/114	170307_chiba_PAF15_02.raw
	High	FSASGELGTGNVK	Unambiguous	4	2	NP_001081011.1;NP_001082364.1		CID	1	0	1	1	99.48	1.7697e-09	0	3.81041	0	2	633.82	1266.63	-0.310764	58.1564	5472	5472	MS2	11/114	170307_chiba_PAF15_02.raw
	High	FSASGELGTGNVK	Unambiguous	4	2	NP_001081011.1;NP_001082364.1		CID	1	0	1	1	99.41	1.6839e-09	0	8.20874	1	2	633.82	1266.63	-0.0216418	139.975	16689	16689	MS2	11/114	170307_chiba_PAF15_02.raw
	High	FSASGELGTGNVK	Unambiguous	4	2	NP_001081011.1;NP_001082364.1		CID	1	0	1	1	99.4	1.49834e-09	0	16.5713	0	2	633.819	1266.63	-0.792634	53.1717	4720	4720	MS2	11/114	170307_chiba_PAF15_02.raw
	High	FSASGELGTGNVK	Unambiguous	4	2	NP_001081011.1;NP_001082364.1		CID	1	0	1	1	99.39	1.51906e-09	0	12.7346	0	2	633.819	1266.63	-1.66	66.1639	6648	6648	MS2	11/114	170307_chiba_PAF15_02.raw
	High	FSASGELGTGNVK	Unambiguous	4	2	NP_001081011.1;NP_001082364.1		CID	1	0	1	1	99.37	1.75151e-09	0	11.1412	1	2	633.82	1266.63	-0.118016	124.106	14588	14588	MS2	11/114	170307_chiba_PAF15_02.raw
	High	FSASGELGTGNVK	Unambiguous	4	2	NP_001081011.1;NP_001082364.1		CID	1	0	1	1	99.37	2.43362e-09	0	8.62697	8	2	633.82	1266.63	0.749349	149.072	17835	17835	MS2	11/114	170307_chiba_PAF15_02.raw
	High	FSASGELGTGNVK	Unambiguous	4	2	NP_001081011.1;NP_001082364.1		CID	1	0	1	1	99.35	1.51569e-09	0	8.35926	0	2	633.82	1266.63	-0.503512	68.7804	7027	7027	MS2	11/114	170307_chiba_PAF15_02.raw
	High	FSASGELGTGNVK	Unambiguous	4	2	NP_001081011.1;NP_001082364.1		CID	1	0	1	1	99.34	1.51918e-09	0	2.77559	0	2	633.82	1266.63	-0.599886	48.2475	3958	3958	MS2	11/114	170307_chiba_PAF15_02.raw
	High	FSASGELGTGNVK	Unambiguous	4	2	NP_001081011.1;NP_001082364.1		CID	1	0	1	1	99.33	1.52269e-09	0	5.83762	0	2	633.819	1266.63	-1.08176	47.4096	3832	3832	MS2	11/114	170307_chiba_PAF15_02.raw
	High	ATPLSPTVILSMSADIPLVVEYK	Unambiguous	3	2	NP_001081011.1;NP_001082364.1		CID	1	0	1	1	99.31	8.79147e-10	0	10.1861	0	2	1222.67	2444.34	0.0792848	123.283	14479	14479	MS2	13/214	170307_chiba_PAF15_02.raw
	High	FSASGELGTGNVK	Unambiguous	4	2	NP_001081011.1;NP_001082364.1		CID	1	0	1	1	99.24	1.55457e-09	0	14.2904	0	2	633.82	1266.63	-0.503512	84.978	9317	9317	MS2	11/114	170307_chiba_PAF15_02.raw
	High	ATPLSPTVILSMSADIPLVVEYK	Unambiguous	3	2	NP_001081011.1;NP_001082364.1		CID	1	0	1	1	99.13	9.1635e-10	0	7.05218	0	2	1222.67	2444.34	0.0792848	136.749	16264	16264	MS2	13/214	170307_chiba_PAF15_02.raw
	High	FSASGELGTGNVK	Unambiguous	4	2	NP_001081011.1;NP_001082364.1		CID	1	0	1	1	99.05	1.88544e-09	0	7.20811	33	2	633.82	1266.63	-0.118016	154.055	18382	18382	MS2	11/114	170307_chiba_PAF15_02.raw
	High	ATPLSPTVILSMSADIPLVVEYK	Unambiguous	3	2	NP_001081011.1;NP_001082364.1		CID	1	0	1	1	99.01	9.42022e-10	0	5.2274	0	2	1222.67	2444.34	-0.0205953	135.955	16159	16159	MS2	14/214	170307_chiba_PAF15_02.raw
	High	ATPLSPTVILSMSADIPLVVEYK	Unambiguous	3	2	NP_001081011.1;NP_001082364.1		CID	1	0	1	1	98.95	9.67862e-10	0	5.91571	13	2	1222.67	2444.34	1.17797	153.369	18309	18309	MS2	14/214	170307_chiba_PAF15_02.raw
	High	ATPLSPTVILSMSADIPLVVEYK	Unambiguous	3	2	NP_001081011.1;NP_001082364.1		CID	1	0	1	1	98.92	9.93806e-10	0	10.2151	0	2	1222.67	2444.33	-0.619877	120.912	14164	14164	MS2	14/214	170307_chiba_PAF15_02.raw
	High	FSASGELGTGNVK	Unambiguous	4	2	NP_001081011.1;NP_001082364.1		CID	1	0	1	1	98.87	2.32844e-09	0	5.6572	6	2	633.82	1266.63	0.556601	144.451	17280	17280	MS2	10/114	170307_chiba_PAF15_02.raw
	High	AEDNADTVTMVFESPNQEK	Unambiguous	4	2	NP_001081011.1;NP_001082364.1		CID	1	0	1	1	98.69	5.34069e-10	0	1.02754	0	2	1062.97	2124.94	-0.850774	63.6821	6292	6292	MS2	25/206	170307_chiba_PAF15_02.raw
	High	FSASGELGTGNVK	Unambiguous	4	2	NP_001081011.1;NP_001082364.1		CID	1	0	1	1	98.53	2.08318e-09	0	20.0013	1	2	633.82	1266.63	-0.407138	110.354	12760	12760	MS2	17/114	170307_chiba_PAF15_02.raw
	High	DLSQIGDAVVISCAK	Unambiguous	4	2	NP_001081011.1;NP_001082364.1		CID	1	0	1	1	98.4	2.64515e-09	0	32.0845	12	2	759.896	1518.78	0.609689	149.728	17900	17900	MS2	11/156	170307_chiba_PAF15_02.raw
	High	DLSQIGDAVVISCAK	Unambiguous	4	2	NP_001081011.1;NP_001082364.1		CID	1	0	1	1	98.32	2.69433e-09	0	23.3575	12	2	759.896	1518.78	0.529315	150.538	17988	17988	MS2	11/156	170307_chiba_PAF15_02.raw
	High	AEDNADTVTMVFESPNQEK	Unambiguous	4	2	NP_001081011.1;NP_001082364.1		CID	1	0	1	1	98.04	6.20293e-10	0	0	0	2	1062.97	2124.94	-0.850774	74.6183	7839	7839	MS2	22/206	170307_chiba_PAF15_02.raw
	High	FSASGELGTGNVK	Unambiguous	4	2	NP_001081011.1;NP_001082364.1		CID	1	0	1	1	97.82	2.50272e-09	0	15.5588	1	2	633.82	1266.63	-0.21439	137.584	16374	16374	MS2	11/114	170307_chiba_PAF15_02.raw
	High	AEDNADTVTmVFESPNQEK	Unambiguous	4	2	NP_001081011.1;NP_001082364.1	M10(Oxidation)	CID	1	0	1	1	97.8	5.2277e-10	0	12.1467	1	2	1070.97	2140.93	-0.635944	56.2846	5194	5194	MS2	19/206	170307_chiba_PAF15_02.raw
	High	DLSQIGDAVVISCAK	Unambiguous	4	2	NP_001081011.1;NP_001082364.1		CID	1	0	1	1	97.77	2.43979e-09	0	24.0185	2	2	759.896	1518.79	1.1723	143.212	17115	17115	MS2	11/156	170307_chiba_PAF15_02.raw
	High	FSASGELGTGNVK	Unambiguous	4	2	NP_001081011.1;NP_001082364.1		CID	1	0	1	1	97.55	2.29409e-09	0	29.2172	0	2	633.819	1266.63	-0.985382	78.2941	8370	8370	MS2	11/114	170307_chiba_PAF15_02.raw
	High	FSASGELGTGNVK	Unambiguous	4	2	NP_001081011.1;NP_001082364.1		CID	1	0	1	1	97.38	2.33997e-09	0	12.5013	0	2	633.819	1266.63	-2.0455	53.9623	4843	4843	MS2	11/114	170307_chiba_PAF15_02.raw
	High	FSASGELGTGNVK	Unambiguous	4	2	NP_001081011.1;NP_001082364.1		CID	1	0	1	1	97.36	2.39668e-09	0	10.4405	1	2	633.82	1266.63	-0.503512	123.312	14483	14483	MS2	11/114	170307_chiba_PAF15_02.raw
	High	FSASGELGTGNVK	Unambiguous	4	2	NP_001081011.1;NP_001082364.1		CID	1	0	1	1	97.23	2.78175e-09	0	25.0486	1	2	633.82	1266.63	0.0747321	90.1356	10030	10030	MS2	11/114	170307_chiba_PAF15_02.raw
	High	FSASGELGTGNVK	Unambiguous	4	2	NP_001081011.1;NP_001082364.1		CID	1	0	1	1	97.22	2.4752e-09	0	17.6123	1	2	633.819	1266.63	-0.889008	124.906	14694	14694	MS2	11/114	170307_chiba_PAF15_02.raw
	High	FSASGELGTGNVK	Unambiguous	4	2	NP_001081011.1;NP_001082364.1		CID	1	0	1	1	97.2	2.48663e-09	0	2.71638	0	2	633.819	1266.63	-1.08176	52.0452	4548	4548	MS2	11/114	170307_chiba_PAF15_02.raw
	High	FSASGELGTGNVK	Unambiguous	4	2	NP_001081011.1;NP_001082364.1		CID	1	0	1	1	97.16	2.52887e-09	0	14.3372	1	2	633.819	1266.63	-1.46725	120.152	14064	14064	MS2	11/114	170307_chiba_PAF15_02.raw
	High	FSASGELGTGNVK	Unambiguous	4	2	NP_001081011.1;NP_001082364.1		CID	1	0	1	1	97.13	3.24351e-09	0	15.9086	0	2	633.818	1266.63	-3.00924	54.7914	4969	4969	MS2	11/114	170307_chiba_PAF15_02.raw
	High	FSASGELGTGNVK	Unambiguous	4	2	NP_001081011.1;NP_001082364.1		CID	1	0	1	1	97.12	2.94044e-09	0	14.9309	1	2	633.82	1266.63	-0.21439	115.171	13400	13400	MS2	11/114	170307_chiba_PAF15_02.raw
	High	FSASGELGTGNVK	Unambiguous	4	2	NP_001081011.1;NP_001082364.1		CID	1	0	1	1	97.09	2.56996e-09	0	19.7605	1	2	633.819	1266.63	-1.17813	95.4418	10750	10750	MS2	11/114	170307_chiba_PAF15_02.raw
	High	FSASGELGTGNVK	Unambiguous	4	2	NP_001081011.1;NP_001082364.1		CID	1	0	1	1	97.05	2.57401e-09	0	5.09375	1	2	633.819	1266.63	-0.889008	121.73	14273	14273	MS2	11/114	170307_chiba_PAF15_02.raw
	High	FSASGELGTGNVK	Unambiguous	4	2	NP_001081011.1;NP_001082364.1		CID	1	0	1	1	96.95	3.16884e-09	0	10.1149	1	2	633.82	1266.63	-0.310764	127.242	15006	15006	MS2	11/114	170307_chiba_PAF15_02.raw
	High	FSASGELGTGNVK	Unambiguous	4	2	NP_001081011.1;NP_001082364.1		CID	1	0	1	1	96.94	3.17614e-09	0	11.2702	1	2	633.82	1266.63	-0.310764	108.165	12468	12468	MS2	11/114	170307_chiba_PAF15_02.raw
	High	FSASGELGTGNVK	Unambiguous	4	2	NP_001081011.1;NP_001082364.1		CID	1	0	1	1	96.82	3.05715e-09	0	27.7913	0	2	633.82	1266.63	-0.0216418	83.4202	9092	9092	MS2	18/114	170307_chiba_PAF15_02.raw
	High	FSASGELGTGNVK	Unambiguous	4	2	NP_001081011.1;NP_001082364.1		CID	1	0	1	1	96.73	4.26772e-09	0	5.01549	15	2	633.82	1266.63	0.845723	152.94	18261	18261	MS2	11/114	170307_chiba_PAF15_02.raw
	High	ATPLSPTVILSMSADIPLVVEYK	Unambiguous	3	2	NP_001081011.1;NP_001082364.1		CID	1	0	1	1	96.23	1.94159e-09	0	7.66392	0	2	1222.67	2444.34	0.179165	137.547	16369	16369	MS2	13/214	170307_chiba_PAF15_02.raw
	High	ATPLSPTVILSMSADIPLVVEYK	Unambiguous	3	2	NP_001081011.1;NP_001082364.1		CID	1	0	1	1	96.01	1.95477e-09	0	4.61845	0	2	1222.67	2444.34	0.279045	128.801	15214	15214	MS2	11/214	170307_chiba_PAF15_02.raw
	High	AEDNADTVTMVFESPNQEK	Unambiguous	4	2	NP_001081011.1;NP_001082364.1		CID	1	0	1	1	95.82	9.42546e-10	0	39.6101	27	2	1062.97	2124.94	-1.65503	153.736	18347	18347	MS2	13/206	170307_chiba_PAF15_02.raw
	High	FSASGELGTGNVK	Unambiguous	4	2	NP_001081011.1;NP_001082364.1		CID	1	0	1	1	95.71	3.50437e-09	0	17.9622	9	2	633.819	1266.63	-0.69626	144.625	17303	17303	MS2	11/114	170307_chiba_PAF15_02.raw
	High	FSASGELGTGNVK	Unambiguous	4	2	NP_001081011.1;NP_001082364.1		CID	1	0	1	1	95.57	4.11838e-09	0	21.3418	1	2	633.82	1266.63	-0.407138	88.3951	9787	9787	MS2	11/114	170307_chiba_PAF15_02.raw
	High	AEDNADTVTMVFESPNQEK	Unambiguous	4	2	NP_001081011.1;NP_001082364.1		CID	1	0	1	1	95.53	1.24555e-09	0	38.8179	59	2	1062.97	2124.94	0.987513	148.607	17788	17788	MS2	13/206	170307_chiba_PAF15_02.raw
	High	FSASGELGTGNVK	Unambiguous	4	2	NP_001081011.1;NP_001082364.1		CID	1	0	1	1	95.41	3.755e-09	0	15.0353	1	2	633.82	1266.63	-0.503512	110.576	12790	12790	MS2	11/114	170307_chiba_PAF15_02.raw
	High	DLSQIGDAVVISCAK	Unambiguous	4	2	NP_001081011.1;NP_001082364.1		CID	1	0	1	1	95.2	5.17922e-09	0	24.6013	9	2	759.896	1518.78	0.368568	148.917	17817	17817	MS2	11/156	170307_chiba_PAF15_02.raw
	High	FSASGELGTGNVK	Unambiguous	4	2	NP_001081011.1;NP_001082364.1		CID	1	0	1	1	95.19	5.84194e-09	0	7.49894	6	2	633.821	1266.63	1.80946	146.24	17502	17502	MS2	11/114	170307_chiba_PAF15_02.raw
	High	FSASGELGTGNVK	Unambiguous	4	2	NP_001081011.1;NP_001082364.1		CID	1	0	1	1	95.1	4.03284e-09	0	8.53755	0	2	633.819	1266.63	-0.889008	64.4106	6399	6399	MS2	10/114	170307_chiba_PAF15_02.raw
	High	DLSQIGDAVVISCAK	Unambiguous	4	2	NP_001081011.1;NP_001082364.1		CID	1	0	1	1	95.06	4.27288e-09	0	5.478	13	2	759.895	1518.78	-0.595917	153.703	18343	18343	MS2	10/156	170307_chiba_PAF15_02.raw
	High	FSASGELGTGNVK	Unambiguous	4	2	NP_001081011.1;NP_001082364.1		CID	1	0	1	1	95.04	4.08894e-09	0	27.3677	0	2	633.819	1266.63	-0.792634	72.1225	7491	7491	MS2	11/114	170307_chiba_PAF15_02.raw
	High	FSASGELGTGNVK	Unambiguous	4	2	NP_001081011.1;NP_001082364.1		CID	1	0	1	1	95.02	4.10781e-09	0	23.4565	1	2	633.819	1266.63	-0.889008	104.495	11976	11976	MS2	11/114	170307_chiba_PAF15_02.raw
	High	FSASGELGTGNVK	Unambiguous	4	2	NP_001081011.1;NP_001082364.1		CID	1	0	1	1	95.02	5.94924e-09	0	6.14942	1	2	633.82	1266.63	0.363854	116.834	13623	13623	MS2	11/114	170307_chiba_PAF15_02.raw
	High	FSASGELGTGNVK	Unambiguous	4	2	NP_001081011.1;NP_001082364.1		CID	1	0	1	1	94.93	4.8687e-09	0	9.11303	0	2	633.82	1266.63	-0.21439	69.6829	7153	7153	MS2	11/114	170307_chiba_PAF15_02.raw
	High	ATPLSPTVILSMSADIPLVVEYK	Unambiguous	3	2	NP_001081011.1;NP_001082364.1		CID	1	0	1	1	94.81	2.54385e-09	0	4.38557	3	2	1222.67	2444.34	0.878325	149.463	17876	17876	MS2	14/214	170307_chiba_PAF15_02.raw
	High	FSASGELGTGNVK	Unambiguous	4	2	NP_001081011.1;NP_001082364.1		CID	1	0	1	1	94.8	4.32126e-09	0	4.24609	0	2	633.82	1266.63	-0.503512	50.6795	4336	4336	MS2	11/114	170307_chiba_PAF15_02.raw
	High	FSASGELGTGNVK	Unambiguous	4	2	NP_001081011.1;NP_001082364.1		CID	1	0	1	1	94.78	4.34121e-09	0	22.0759	0	2	633.819	1266.63	-0.889008	63.5573	6273	6273	MS2	11/114	170307_chiba_PAF15_02.raw
	High	FSASGELGTGNVK	Unambiguous	4	2	NP_001081011.1;NP_001082364.1		CID	1	0	1	1	94.73	4.39148e-09	0	6.57463	0	2	633.819	1266.63	-1.08176	51.5039	4464	4464	MS2	11/114	170307_chiba_PAF15_02.raw
	High	AEDNADTVTMVFESPNQEK	Unambiguous	4	2	NP_001081011.1;NP_001082364.1		CID	1	0	1	1	94.73	1.49748e-09	0	35.8607	100	2	1062.97	2124.94	0.987513	151.28	18074	18074	MS2	25/206	170307_chiba_PAF15_02.raw
	High	DLSQIGDAVVISCAK	Unambiguous	4	2	NP_001081011.1;NP_001082364.1		CID	1	0	1	1	94.69	5.24721e-09	0	33.5649	13	2	759.895	1518.78	-0.0333005	151.401	18088	18088	MS2	11/156	170307_chiba_PAF15_02.raw
	High	FSASGELGTGNVK	Unambiguous	4	2	NP_001081011.1;NP_001082364.1		CID	1	0	1	1	94.62	5.41876e-09	0	21.8188	0	2	633.82	1266.63	-0.310764	100.505	11436	11436	MS2	10/114	170307_chiba_PAF15_02.raw
	High	ATPLSPTVILSMSADIPLVVEYK	Unambiguous	3	2	NP_001081011.1;NP_001082364.1		CID	1	0	1	1	94.61	2.59455e-09	0	6.60475	0	2	1222.67	2444.34	-0.120475	135.154	16054	16054	MS2	14/214	170307_chiba_PAF15_02.raw
	High	FSASGELGTGNVK	Unambiguous	4	2	NP_001081011.1;NP_001082364.1		CID	1	0	1	1	94.35	4.79303e-09	0	10.9972	2	2	633.819	1266.63	-0.889008	109.75	12679	12679	MS2	18/114	170307_chiba_PAF15_02.raw
	High	FSASGELGTGNVK	Unambiguous	4	2	NP_001081011.1;NP_001082364.1		CID	1	0	1	1	94.25	5.52481e-09	0	23.9221	1	2	633.82	1266.63	-0.0216418	111.331	12890	12890	MS2	10/114	170307_chiba_PAF15_02.raw
	High	FSASGELGTGNVK	Unambiguous	4	2	NP_001081011.1;NP_001082364.1		CID	1	0	1	1	93.99	5.86567e-09	0	29.9343	1	2	633.82	1266.63	-0.0216418	108.966	12574	12574	MS2	10/114	170307_chiba_PAF15_02.raw
	High	FSASGELGTGNVK	Unambiguous	4	2	NP_001081011.1;NP_001082364.1		CID	1	0	1	1	93.95	6.10116e-09	0	29.5426	0	2	633.82	1266.63	-0.118016	70.5974	7280	7280	MS2	10/114	170307_chiba_PAF15_02.raw
	High	AEDNADTVTMVFESPNQEK	Unambiguous	4	2	NP_001081011.1;NP_001082364.1		CID	1	0	1	1	93.76	1.64083e-09	0	14.6826	1	2	1062.97	2124.94	0.298156	81.2193	8785	8785	MS2	24/206	170307_chiba_PAF15_02.raw
	High	ATPLSPTVILSMSADIPLVVEYK	Unambiguous	3	2	NP_001081011.1;NP_001082364.1		CID	1	0	1	1	93.69	3.48464e-09	0	6.44939	0	2	1222.67	2444.34	0.179165	114.776	13347	13347	MS2	13/214	170307_chiba_PAF15_02.raw
	High	ATPLSPTVILSMSADIPLVVEYK	Unambiguous	3	2	NP_001081011.1;NP_001082364.1		CID	1	0	1	1	93.65	3.36585e-09	0	6.17518	0	2	1222.67	2444.34	0.279045	131.188	15529	15529	MS2	13/214	170307_chiba_PAF15_02.raw
	High	AEDNADTVTMVFESPNQEK	Unambiguous	4	2	NP_001081011.1;NP_001082364.1		CID	1	0	1	1	93.59	1.85947e-09	0	3.28251	0	2	1062.97	2124.94	-0.620988	66.4442	6688	6688	MS2	14/206	170307_chiba_PAF15_02.raw
	High	ATPLSPTVILSMSADIPLVVEYK	Unambiguous	3	2	NP_001081011.1;NP_001082364.1		CID	1	0	1	1	93.55	3.44425e-09	0	6.69111	0	2	1222.67	2444.34	0.279045	125.663	14794	14794	MS2	13/214	170307_chiba_PAF15_02.raw
	High	ATPLSPTVILSMSADIPLVVEYK	Unambiguous	3	2	NP_001081011.1;NP_001082364.1		CID	1	0	1	1	93.5	3.30546e-09	0	9.49524	0	2	1222.67	2444.33	-0.519996	121.701	14269	14269	MS2	13/214	170307_chiba_PAF15_02.raw
	High	AEDNADTVTMVFESPNQEK	Unambiguous	4	2	NP_001081011.1;NP_001082364.1		CID	1	0	1	1	93.42	1.77445e-09	0	2.64908	0	2	1062.97	2124.94	0.298156	69.0582	7066	7066	MS2	13/206	170307_chiba_PAF15_02.raw
	High	FSASGELGTGNVK	Unambiguous	4	2	NP_001081011.1;NP_001082364.1		CID	1	0	1	1	93.32	6.91395e-09	0	10.7119	1	2	633.82	1266.63	-0.407138	136.764	16266	16266	MS2	11/114	170307_chiba_PAF15_02.raw
	High	DLSQIGDAVVISCAK	Unambiguous	4	2	NP_001081011.1;NP_001082364.1		CID	1	0	1	1	93.3	7.34344e-09	0	33.2462	56	2	759.895	1518.78	-0.435169	152.835	18252	18252	MS2	13/156	170307_chiba_PAF15_02.raw
	High	FSASGELGTGNVK	Unambiguous	4	2	NP_001081011.1;NP_001082364.1		CID	1	0	1	1	93.29	6.96188e-09	0	19.5609	1	2	633.82	1266.63	-0.407138	103.725	11872	11872	MS2	11/114	170307_chiba_PAF15_02.raw
	High	FSASGELGTGNVK	Unambiguous	4	2	NP_001081011.1;NP_001082364.1		CID	1	0	1	1	93.26	6.16042e-09	0	13.4227	1	2	633.819	1266.63	-0.985382	102.836	11751	11751	MS2	11/114	170307_chiba_PAF15_02.raw
	High	FSASGELGTGNVK	Unambiguous	4	2	NP_001081011.1;NP_001082364.1		CID	1	0	1	1	93.19	6.26052e-09	0	4.24513	0	2	633.819	1266.63	-0.69626	46.6076	3706	3706	MS2	11/114	170307_chiba_PAF15_02.raw
	High	FSASGELGTGNVK	Unambiguous	4	2	NP_001081011.1;NP_001082364.1		CID	1	0	1	1	93.16	6.30392e-09	0	26.9882	0	2	633.819	1266.63	-0.889008	85.7992	9429	9429	MS2	11/114	170307_chiba_PAF15_02.raw
	High	FSASGELGTGNVK	Unambiguous	4	2	NP_001081011.1;NP_001082364.1		CID	1	0	1	1	93.12	9.67744e-09	0	14.9148	10	2	633.82	1266.63	0.652975	151.068	18051	18051	MS2	11/114	170307_chiba_PAF15_02.raw
	High	FSASGELGTGNVK	Unambiguous	4	2	NP_001081011.1;NP_001082364.1		CID	1	0	1	1	93.08	7.30679e-09	0	33.4556	0	2	633.82	1266.63	-0.407138	93.986	10556	10556	MS2	11/114	170307_chiba_PAF15_02.raw
	High	AEDNADTVTMVFESPNQEK	Unambiguous	4	2	NP_001081011.1;NP_001082364.1		CID	1	0	1	1	93	2.35558e-09	0	12.2853	0	2	1062.97	2124.94	-0.506095	65.5613	6562	6562	MS2	15/206	170307_chiba_PAF15_02.raw
	High	DLSQIGDAVVISCAK	Unambiguous	4	2	NP_001081011.1;NP_001082364.1		CID	1	0	1	1	92.99	6.88209e-09	0	10.2031	0	2	759.895	1518.78	-0.917413	73.0568	7620	7620	MS2	11/156	170307_chiba_PAF15_02.raw
	High	ATPLSPTVILSMSADIPLVVEYK	Unambiguous	3	2	NP_001081011.1;NP_001082364.1		CID	1	0	1	1	92.8	4.04102e-09	0	7.46993	0	2	1222.67	2444.34	1.07809	143.564	17162	17162	MS2	14/214	170307_chiba_PAF15_02.raw
	High	AEDNADTVTMVFESPNQEK	Unambiguous	4	2	NP_001081011.1;NP_001082364.1		CID	1	0	1	1	92.71	2.3843e-09	0	47.5218	41	2	1062.97	2124.94	0.987513	145.992	17473	17473	MS2	16/206	170307_chiba_PAF15_02.raw
	High	FSASGELGTGNVK	Unambiguous	4	2	NP_001081011.1;NP_001082364.1		CID	1	0	1	1	92.66	7.07311e-09	0	3.62087	0	2	633.819	1266.63	-0.889008	49.0632	4084	4084	MS2	11/114	170307_chiba_PAF15_02.raw
	High	FSASGELGTGNVK	Unambiguous	4	2	NP_001081011.1;NP_001082364.1		CID	1	0	1	1	92.53	7.28804e-09	0	13.4115	1	2	633.82	1266.63	-0.599886	112.112	12994	12994	MS2	11/114	170307_chiba_PAF15_02.raw
	High	AEDNADTVTMVFESPNQEK	Unambiguous	4	2	NP_001081011.1;NP_001082364.1		CID	1	0	1	1	92.43	2.22877e-09	0	13.2766	0	2	1062.97	2124.94	0.298156	71.3289	7381	7381	MS2	15/206	170307_chiba_PAF15_02.raw
	High	AEDNADTVTMVFESPNQEK	Unambiguous	4	2	NP_001081011.1;NP_001082364.1		CID	1	0	1	1	92.33	2.39764e-09	0	26.0063	35	2	1062.97	2124.94	0.527942	150.172	17951	17951	MS2	23/206	170307_chiba_PAF15_02.raw
	High	AEDNADTVTMVFESPNQEK	Unambiguous	4	2	NP_001081011.1;NP_001082364.1		CID	1	0	1	1	91.77	2.59457e-09	0	37.4302	49	2	1062.97	2124.94	0.298156	151.456	18094	18094	MS2	13/206	170307_chiba_PAF15_02.raw
	High	AEDNADTVTMVFESPNQEK	Unambiguous	4	2	NP_001081011.1;NP_001082364.1		CID	1	0	1	1	91.76	3.13399e-09	0	15.0694	1	2	1062.97	2124.94	-0.506095	81.3148	8798	8798	MS2	25/206	170307_chiba_PAF15_02.raw
	High	VLEALKDLIDEACWDITSSGISLQSMDSSHVSLVQLTLR	Unambiguous	4	2	NP_001081011.1;NP_001082364.1		CID	1	0	1	1	91.58	4.17015e-09	1	20.553	2	3	1425.07	4273.18	2.49972	143.954	17215	17215	MS2	25/438	170307_chiba_PAF15_02.raw
	High	VLEALKDLIDEACWDITSSGISLQSMDSSHVSLVQLTLR	Unambiguous	4	2	NP_001081011.1;NP_001082364.1		CID	1	0	1	1	91.53	3.12867e-09	1	4.21289	58	3	1425.06	4273.18	0.614329	150.029	17934	17934	MS2	25/438	170307_chiba_PAF15_02.raw
	High	AEDNADTVTMVFESPNQEK	Unambiguous	4	2	NP_001081011.1;NP_001082364.1		CID	1	0	1	1	91.49	3.72528e-09	0	32.3706	37	2	1062.97	2124.94	1.67687	148.35	17760	17760	MS2	22/206	170307_chiba_PAF15_02.raw
	High	AEDNADTVTMVFESPNQEK	Unambiguous	4	2	NP_001081011.1;NP_001082364.1		CID	1	0	1	1	91.44	2.83529e-09	0	10.8841	2	2	1062.97	2124.94	-0.850774	85.1577	9342	9342	MS2	13/206	170307_chiba_PAF15_02.raw
	High	FSASGELGTGNVK	Unambiguous	4	2	NP_001081011.1;NP_001082364.1		CID	1	0	1	1	91.33	1.08222e-08	0	15.1379	1	2	633.82	1266.63	-0.0216418	107.391	12365	12365	MS2	10/114	170307_chiba_PAF15_02.raw
	High	FSASGELGTGNVK	Unambiguous	4	2	NP_001081011.1;NP_001082364.1		CID	1	0	1	1	91.31	9.65185e-09	0	7.73347	1	2	633.819	1266.63	-0.69626	122.524	14379	14379	MS2	11/114	170307_chiba_PAF15_02.raw
	High	FSASGELGTGNVK	Unambiguous	4	2	NP_001081011.1;NP_001082364.1		CID	1	0	1	1	91.31	9.65185e-09	0	24.4655	0	2	633.82	1266.63	-0.599886	81.7637	8861	8861	MS2	10/114	170307_chiba_PAF15_02.raw
	High	FSASGELGTGNVK	Unambiguous	4	2	NP_001081011.1;NP_001082364.1		CID	1	0	1	1	91.25	1.13609e-08	0	9.63145	1	2	633.82	1266.63	-0.21439	106.586	12258	12258	MS2	11/114	170307_chiba_PAF15_02.raw
	High	FSASGELGTGNVK	Unambiguous	4	2	NP_001081011.1;NP_001082364.1		CID	1	0	1	1	91.08	1.01768e-08	0	10.6177	1	2	633.819	1266.63	-1.08176	118.599	13858	13858	MS2	10/114	170307_chiba_PAF15_02.raw
	High	AEDNADTVTMVFESPNQEK	Unambiguous	4	2	NP_001081011.1;NP_001082364.1		CID	1	0	1	1	91.07	4.02538e-09	0	26.298	32	2	1062.97	2124.94	1.2173	149.096	17838	17838	MS2	15/206	170307_chiba_PAF15_02.raw
	High	FSASGELGTGNVK	Unambiguous	4	2	NP_001081011.1;NP_001082364.1		CID	1	0	1	1	91.02	1.03184e-08	0	41.5909	0	2	633.819	1266.63	-0.792634	76.5895	8124	8124	MS2	11/114	170307_chiba_PAF15_02.raw
	High	FSASGELGTGNVK	Unambiguous	4	2	NP_001081011.1;NP_001082364.1		CID	1	0	1	1	90.95	1.05664e-08	0	8.714	0	2	633.819	1266.63	-1.37088	65.2836	6523	6523	MS2	10/114	170307_chiba_PAF15_02.raw
	High	FSASGELGTGNVK	Unambiguous	4	2	NP_001081011.1;NP_001082364.1		CID	1	0	1	1	90.95	1.595e-08	0	10.6587	9	2	633.82	1266.63	0.652975	151.394	18087	18087	MS2	10/114	170307_chiba_PAF15_02.raw
	High	FSASGELGTGNVK	Unambiguous	4	2	NP_001081011.1;NP_001082364.1		CID	1	0	1	1	90.9	1.53625e-08	0	0	19	2	633.82	1266.63	0.363854	153.137	18284	18284	MS2	11/114	170307_chiba_PAF15_02.raw
	High	FSASGELGTGNVK	Unambiguous	4	2	NP_001081011.1;NP_001082364.1		CID	1	0	1	1	90.88	1.06564e-08	0	6.18913	0	2	633.819	1266.63	-0.69626	49.8716	4210	4210	MS2	11/114	170307_chiba_PAF15_02.raw
	High	ATPLSPTVILSMSADIPLVVEYK	Unambiguous	3	2	NP_001081011.1;NP_001082364.1		CID	1	0	1	1	90.82	6.29236e-09	0	11.4907	3	2	1222.67	2444.34	1.37772	146.914	17585	17585	MS2	13/214	170307_chiba_PAF15_02.raw
	High	FSASGELGTGNVK	Unambiguous	4	2	NP_001081011.1;NP_001082364.1		CID	1	0	1	1	90.79	1.10046e-08	0	20.9493	0	2	633.819	1266.63	-1.56363	73.8021	7725	7725	MS2	10/114	170307_chiba_PAF15_02.raw
	High	ATPLSPTVILSMSADIPLVVEYK	Unambiguous	3	2	NP_001081011.1;NP_001082364.1		CID	1	0	1	1	90.76	6.212e-09	0	12.8584	0	2	1222.67	2444.34	-0.220356	119.329	13954	13954	MS2	11/214	170307_chiba_PAF15_02.raw
	High	ATPLSPTVILSMSADIPLVVEYK	Unambiguous	3	2	NP_001081011.1;NP_001082364.1		CID	1	0	1	1	90.63	6.40076e-09	0	23.2178	2	2	1222.67	2444.33	-0.519996	110.876	12830	12830	MS2	14/214	170307_chiba_PAF15_02.raw
	High	AEDNADTVTMVFESPNQEK	Unambiguous	4	2	NP_001081011.1;NP_001082364.1		CID	1	0	1	1	90.52	3.77041e-09	0	2.59602	0	2	1062.97	2124.94	-0.620988	68.1609	6940	6940	MS2	15/206	170307_chiba_PAF15_02.raw
	High	AEDNADTVTMVFESPNQEK	Unambiguous	4	2	NP_001081011.1;NP_001082364.1		CID	1	0	1	1	90.24	4.49463e-09	0	32.5693	1	2	1062.97	2124.94	-0.161416	84.2867	9219	9219	MS2	12/206	170307_chiba_PAF15_02.raw
	High	FSASGELGTGNVK	Unambiguous	4	2	NP_001081011.1;NP_001082364.1		CID	1	0	1	1	90.11	1.27236e-08	0	14.69	0	2	633.819	1266.63	-1.08176	67.1045	6783	6783	MS2	11/114	170307_chiba_PAF15_02.raw
	High	LSQTSNVDKEEEAVTIEMNEPVQLTFALR	Unambiguous	4	2	NP_001081011.1;NP_001082364.1		CID	1	0	1	1	90.04	6.93582e-09	1	37.1127	1	2	1646.33	3291.65	1.24075	98.0789	11109	11109	MS2	12/322	170307_chiba_PAF15_02.raw
	High	AEDNADTVTMVFESPNQEK	Unambiguous	4	2	NP_001081011.1;NP_001082364.1		CID	1	0	1	1	89.96	4.69303e-09	0	26.9584	59	2	1062.97	2124.94	-0.0465225	150.915	18032	18032	MS2	14/206	170307_chiba_PAF15_02.raw
	High	LSQTSNVDKEEEAVTIEMNEPVQLTFALR	Unambiguous	4	2	NP_001081011.1;NP_001082364.1		CID	1	0	1	1	89.94	7.14808e-09	1	33.795	1	2	1646.33	3291.65	1.46326	103.805	11883	11883	MS2	12/322	170307_chiba_PAF15_02.raw
	High	DLIDEACWDITSSGISLQSMDSSHVSLVQLTLR	Unambiguous	4	2	NP_001081011.1;NP_001082364.1		CID	1	0	1	1	89.85	1.05585e-08	0	3.28654	0	3	1207.26	3619.76	0.555258	138.346	16475	16475	MS2	23/346	170307_chiba_PAF15_02.raw
	High	FSASGELGTGNVK	Unambiguous	4	2	NP_001081011.1;NP_001082364.1		CID	1	0	1	1	89.74	1.56069e-08	0	12.6071	1	2	633.82	1266.63	-0.0216418	142.029	16960	16960	MS2	11/114	170307_chiba_PAF15_02.raw
	High	AEDNADTVTMVFESPNQEK	Unambiguous	4	2	NP_001081011.1;NP_001082364.1		CID	1	0	1	1	89.64	5.70373e-09	0	32.5337	8	2	1062.97	2124.94	1.56198	139.273	16597	16597	MS2	14/206	170307_chiba_PAF15_02.raw
	High	LSQTSNVDKEEEAVTIEMNEPVQLTFALR	Unambiguous	4	2	NP_001081011.1;NP_001082364.1		CID	1	0	1	1	89.57	7.72855e-09	1	33.3893	1	2	1646.33	3291.65	1.16658	98.8149	11208	11208	MS2	12/322	170307_chiba_PAF15_02.raw
	High	LSQTSNVDKEEEAVTIEMNEPVQLTFALR	Unambiguous	4	2	NP_001081011.1;NP_001082364.1		CID	1	0	1	1	89.45	9.13684e-09	1	4.40353	0	3	1097.89	3291.64	-0.0798481	126.922	14963	14963	MS2	10/322	170307_chiba_PAF15_02.raw
	High	CAASDDIITLR	Unambiguous	3	1	NP_001081011.1		CID	1	0	1	1	89.44	2.55397e-08	0	4.47577	0	2	589.297	1177.59	-0.64654	55.7659	5113	5113	MS2	9/90	170307_chiba_PAF15_02.raw
	High	FSASGELGTGNVK	Unambiguous	4	2	NP_001081011.1;NP_001082364.1		CID	1	0	1	1	89.08	1.61291e-08	0	7.33305	0	2	633.819	1266.63	-1.08176	57.3055	5347	5347	MS2	11/114	170307_chiba_PAF15_02.raw
	High	FSASGELGTGNVK	Unambiguous	4	2	NP_001081011.1;NP_001082364.1		CID	1	0	1	1	89.08	1.61291e-08	0	18.1988	1	2	633.819	1266.63	-0.889008	112.903	13099	13099	MS2	11/114	170307_chiba_PAF15_02.raw
	High	ATPLSPTVILSMSADIPLVVEYK	Unambiguous	3	2	NP_001081011.1;NP_001082364.1		CID	1	0	1	1	88.96	9.52931e-09	0	7.95454	0	2	1222.67	2444.34	0.0792848	132.77	15739	15739	MS2	14/214	170307_chiba_PAF15_02.raw
	High	DLIDEACWDITSSGISLQSMDSSHVSLVQLTLR	Unambiguous	4	2	NP_001081011.1;NP_001082364.1		CID	1	0	1	1	88.89	1.31059e-08	0	28.8085	0	3	1207.26	3619.77	0.858767	142.329	16999	16999	MS2	28/346	170307_chiba_PAF15_02.raw
	High	DLSQIGDAVVISCAK	Unambiguous	4	2	NP_001081011.1;NP_001082364.1		CID	1	0	1	1	88.86	2.04127e-08	0	28.307	1	2	759.895	1518.78	-0.274422	106.726	12277	12277	MS2	18/156	170307_chiba_PAF15_02.raw
	High	ATPLSPTVILSMSADIPLVVEYK	Unambiguous	3	2	NP_001081011.1;NP_001082364.1		CID	1	0	1	1	88.77	9.95546e-09	0	30.5701	1	2	1222.67	2444.34	-0.120475	110.117	12729	12729	MS2	14/214	170307_chiba_PAF15_02.raw
	High	AEDNADTVTMVFESPNQEK	Unambiguous	4	2	NP_001081011.1;NP_001082364.1		CID	1	0	1	1	88.76	6.25314e-09	0	2.79351	0	2	1062.97	2124.94	-0.506095	67.3131	6814	6814	MS2	25/206	170307_chiba_PAF15_02.raw
	High	FSASGELGTGNVK	Unambiguous	4	2	NP_001081011.1;NP_001082364.1		CID	1	0	1	1	88.55	1.82226e-08	0	15.8486	1	2	633.819	1266.63	-0.985382	120.942	14168	14168	MS2	10/114	170307_chiba_PAF15_02.raw
	High	LSQTSNVDKEEEAVTIEMNEPVQLTFALR	Unambiguous	4	2	NP_001081011.1;NP_001082364.1		CID	1	0	1	1	88.53	1.31864e-08	1	28.0251	1	2	1646.33	3291.65	1.68577	99.632	11319	11319	MS2	11/322	170307_chiba_PAF15_02.raw
	High	DLSQIGDAVVISCAK	Unambiguous	4	2	NP_001081011.1;NP_001082364.1		CID	1	0	1	1	88.47	2.34684e-08	0	39.7639	21	2	759.895	1518.78	0.0470732	152.947	18262	18262	MS2	11/156	170307_chiba_PAF15_02.raw
	High	FSASGELGTGNVK	Unambiguous	4	2	NP_001081011.1;NP_001082364.1		CID	1	0	1	1	88.36	1.90375e-08	0	13.9299	0	2	633.819	1266.63	-0.792634	52.8787	4675	4675	MS2	11/114	170307_chiba_PAF15_02.raw
	High	ATPLSPTVILSMSADIPLVVEYK	Unambiguous	3	2	NP_001081011.1;NP_001082364.1		CID	1	0	1	1	88.34	1.15046e-08	0	17.1529	1	2	1222.67	2444.34	0.578685	144.351	17267	17267	MS2	13/214	170307_chiba_PAF15_02.raw
	High	AEDNADTVTMVFESPNQEK	Unambiguous	4	2	NP_001081011.1;NP_001082364.1		CID	1	0	1	1	88.09	7.37384e-09	0	12.0258	0	2	1062.97	2124.94	-0.276309	72.0957	7487	7487	MS2	13/206	170307_chiba_PAF15_02.raw
	High	FSASGELGTGNVK	Unambiguous	4	2	NP_001081011.1;NP_001082364.1		CID	1	0	1	1	88.03	2.06979e-08	0	50.1571	1	2	633.819	1266.63	-1.37088	82.6954	8991	8991	MS2	9/114	170307_chiba_PAF15_02.raw
	High	FSASGELGTGNVK	Unambiguous	4	2	NP_001081011.1;NP_001082364.1		CID	1	0	1	1	87.99	2.40665e-08	0	5.12448	1	2	633.82	1266.63	-0.21439	131.196	15530	15530	MS2	11/114	170307_chiba_PAF15_02.raw
	High	FSASGELGTGNVK	Unambiguous	4	2	NP_001081011.1;NP_001082364.1		CID	1	0	1	1	87.97	2.08262e-08	0	9.5582	0	2	633.819	1266.63	-0.889008	67.8962	6902	6902	MS2	11/114	170307_chiba_PAF15_02.raw
	High	AEDNADTVTMVFESPNQEK	Unambiguous	4	2	NP_001081011.1;NP_001082364.1		CID	1	0	1	1	87.97	6.46331e-09	0	58.9688	26	2	1062.97	2124.94	0.413049	146.109	17487	17487	MS2	23/206	170307_chiba_PAF15_02.raw
	High	AEDNADTVTMVFESPNQEK	Unambiguous	4	2	NP_001081011.1;NP_001082364.1		CID	1	0	1	1	87.93	7.40897e-09	0	8.43673	45	2	1062.98	2124.94	1.90665	152.666	18233	18233	MS2	25/206	170307_chiba_PAF15_02.raw
	High	DLSQIGDAVVISCAK	Unambiguous	4	2	NP_001081011.1;NP_001082364.1		CID	1	0	1	1	87.92	2.53454e-08	0	16.4817	60	2	759.895	1518.78	-0.274422	153.79	18353	18353	MS2	12/156	170307_chiba_PAF15_02.raw
	High	AEDNADTVTMVFESPNQEK	Unambiguous	4	2	NP_001081011.1;NP_001082364.1		CID	1	0	1	1	87.88	6.35425e-09	0	53.6836	49	2	1062.97	2124.94	0.298156	152.405	18204	18204	MS2	21/206	170307_chiba_PAF15_02.raw
	High	FSASGELGTGNVK	Unambiguous	4	2	NP_001081011.1;NP_001082364.1		CID	1	0	1	1	87.73	2.21782e-08	0	41.7218	0	2	633.819	1266.63	-1.17813	74.9999	7893	7893	MS2	11/114	170307_chiba_PAF15_02.raw
	High	FSASGELGTGNVK	Unambiguous	4	2	NP_001081011.1;NP_001082364.1		CID	1	0	1	1	87.72	2.20603e-08	0	5.91572	1	2	633.82	1266.63	-0.503512	89.435	9933	9933	MS2	10/114	170307_chiba_PAF15_02.raw
	High	VLEALKDLIDEACWDITSSGISLQSMDSSHVSLVQLTLR	Unambiguous	4	2	NP_001081011.1;NP_001082364.1		CID	1	0	1	1	87.69	7.65971e-09	1	29.4562	8	3	1425.06	4273.18	0.957129	145.418	17403	17403	MS2	22/438	170307_chiba_PAF15_02.raw
	High	AEDNADTVTMVFESPNQEK	Unambiguous	4	2	NP_001081011.1;NP_001082364.1		CID	1	0	1	1	87.42	8.5133e-09	0	8.32701	0	2	1062.97	2124.94	-0.506095	78.5934	8415	8415	MS2	23/206	170307_chiba_PAF15_02.raw
	High	LSQTSNVDKEEEAVTIEMNEPVQLTFALR	Unambiguous	4	2	NP_001081011.1;NP_001082364.1		CID	1	0	1	1	87.4	1.66503e-08	1	29.3063	1	2	1646.33	3291.65	1.98245	104.145	11929	11929	MS2	24/322	170307_chiba_PAF15_02.raw
	High	AEDNADTVTMVFESPNQEK	Unambiguous	4	2	NP_001081011.1;NP_001082364.1		CID	1	0	1	1	87.27	7.40623e-09	0	5.03998	1	2	1062.97	2124.94	-0.850774	76.325	8086	8086	MS2	13/206	170307_chiba_PAF15_02.raw
	High	DLIDEACWDITSSGISLQSMDSSHVSLVQLTLR	Unambiguous	4	2	NP_001081011.1;NP_001082364.1		CID	1	0	1	1	87.16	2.10579e-08	0	15.3232	31	3	1207.26	3619.76	0.352918	152.206	18182	18182	MS2	23/346	170307_chiba_PAF15_02.raw
	High	ATPLSPTVILSMSADIPLVVEYK	Unambiguous	3	2	NP_001081011.1;NP_001082364.1		CID	1	0	1	1	86.86	1.60729e-08	0	20.8168	0	2	1222.67	2444.34	0.378925	142.813	17062	17062	MS2	14/214	170307_chiba_PAF15_02.raw
	High	FSASGELGTGNVK	Unambiguous	4	2	NP_001081011.1;NP_001082364.1		CID	1	0	1	1	86.27	3.70595e-08	0	36.0661	1	2	633.82	1266.63	-0.310764	96.2024	10853	10853	MS2	11/114	170307_chiba_PAF15_02.raw
	High	FSASGELGTGNVK	Unambiguous	4	2	NP_001081011.1;NP_001082364.1		CID	1	0	1	1	86.21	3.12328e-08	0	18.123	1	2	633.82	1266.63	-0.503512	101.325	11547	11547	MS2	11/114	170307_chiba_PAF15_02.raw
	High	LSQTSNVDKEEEAVTIEMNEPVQLTFALR	Unambiguous	4	2	NP_001081011.1;NP_001082364.1		CID	1	0	1	1	86.07	2.33578e-08	1	33.2031	0	2	1646.33	3291.65	1.90828	94.1358	10576	10576	MS2	13/322	170307_chiba_PAF15_02.raw
	High	FSASGELGTGNVK	Unambiguous	4	2	NP_001081011.1;NP_001082364.1		CID	1	0	1	1	86.02	3.26295e-08	0	21.4131	0	2	633.819	1266.63	-0.69626	81.0078	8755	8755	MS2	10/114	170307_chiba_PAF15_02.raw
	High	LSQTSNVDKEEEAVTIEMNEPVQLTFALR	Unambiguous	4	2	NP_001081011.1;NP_001082364.1		CID	1	0	1	1	86.02	2.31282e-08	1	34.2507	0	2	1646.32	3291.63	-2.39358	100.03	11373	11373	MS2	13/322	170307_chiba_PAF15_02.raw
	High	FSASGELGTGNVK	Unambiguous	4	2	NP_001081011.1;NP_001082364.1		CID	1	0	1	1	85.83	3.87906e-08	0	21.9014	1	2	633.82	1266.63	-0.407138	117.822	13754	13754	MS2	17/114	170307_chiba_PAF15_02.raw
	High	LSQTSNVDKEEEAVTIEMNEPVQLTFALR	Unambiguous	4	2	NP_001081011.1;NP_001082364.1		CID	1	0	1	1	85.54	2.68084e-08	1	42.8209	1	2	1646.32	3291.63	-2.54192	102.287	11678	11678	MS2	14/322	170307_chiba_PAF15_02.raw
	High	ATPLSPTVILSMSADIPLVVEYK	Unambiguous	3	2	NP_001081011.1;NP_001082364.1		CID	1	0	1	1	85.43	2.14813e-08	0	7.30193	0	2	1222.67	2444.34	-0.0205953	134.348	15949	15949	MS2	13/214	170307_chiba_PAF15_02.raw
	High	FSASGELGTGNVK	Unambiguous	4	2	NP_001081011.1;NP_001082364.1		CID	1	0	1	1	85.1	4.03284e-08	0	18.7057	0	2	633.82	1266.63	-0.599886	77.436	8248	8248	MS2	11/114	170307_chiba_PAF15_02.raw
	High	DLIDEACWDITSSGISLQSMDSSHVSLVQLTLR	Unambiguous	4	2	NP_001081011.1;NP_001082364.1		CID	1	0	1	1	84.94	3.54293e-08	0	6.75204	0	3	1207.26	3619.76	-0.456441	122.331	14353	14353	MS2	29/346	170307_chiba_PAF15_02.raw
	High	FSASGELGTGNVK	Unambiguous	4	2	NP_001081011.1;NP_001082364.1		CID	1	0	1	1	84.89	4.23263e-08	0	5.6909	0	2	633.819	1266.63	-0.889008	45.7739	3581	3581	MS2	9/114	170307_chiba_PAF15_02.raw
	High	AEDNADTVTMVFESPNQEK	Unambiguous	4	2	NP_001081011.1;NP_001082364.1		CID	1	0	1	1	84.52	1.39507e-08	0	9.79895	0	2	1062.97	2124.94	-0.850774	72.8594	7592	7592	MS2	24/206	170307_chiba_PAF15_02.raw
	High	AEDNADTVTMVFESPNQEK	Unambiguous	4	2	NP_001081011.1;NP_001082364.1		CID	1	0	1	1	84.26	1.66863e-08	0	25.4848	37	2	1062.97	2124.94	0.757728	149.361	17867	17867	MS2	15/206	170307_chiba_PAF15_02.raw
	High	ATPLSPTVILSMSADIPLVVEYK	Unambiguous	3	2	NP_001081011.1;NP_001082364.1		CID	1	0	1	1	84.09	2.92456e-08	0	5.32345	0	2	1222.67	2444.34	0.0792848	133.555	15844	15844	MS2	15/214	170307_chiba_PAF15_02.raw
	High	ATPLSPTVILSMSADIPLVVEYK	Unambiguous	3	2	NP_001081011.1;NP_001082364.1		CID	1	0	1	1	84.03	3.10363e-08	0	1.70439	4	2	1222.67	2444.34	0.778445	151.048	18048	18048	MS2	10/214	170307_chiba_PAF15_02.raw
	High	FSASGELGTGNVK	Unambiguous	4	2	NP_001081011.1;NP_001082364.1		CID	1	0	1	1	83.99	5.20727e-08	0	22.9693	0	2	633.819	1266.63	-0.792634	56.2181	5184	5184	MS2	11/114	170307_chiba_PAF15_02.raw
	High	DLSQIGDAVVISCAK	Unambiguous	4	2	NP_001081011.1;NP_001082364.1		CID	1	0	1	1	83.77	6.82108e-08	0	23.8546	0	2	759.895	1518.78	-0.515543	92.7209	10385	10385	MS2	11/156	170307_chiba_PAF15_02.raw
	High	DLIDEACWDITSSGISLQSMDSSHVSLVQLTLR	Unambiguous	4	2	NP_001081011.1;NP_001082364.1		CID	1	0	1	1	83.71	4.31982e-08	0	10.3031	0	3	1207.26	3619.77	0.858767	139.147	16580	16580	MS2	26/346	170307_chiba_PAF15_02.raw
	High	DLSQIGDAVVISCAK	Unambiguous	4	2	NP_001081011.1;NP_001082364.1		CID	1	0	1	1	83.67	7.86052e-08	0	27.4112	1	2	759.896	1518.78	0.529315	116.496	13579	13579	MS2	12/156	170307_chiba_PAF15_02.raw
	High	LSQTSNVDKEEEAVTIEMNEPVQLTFALR	Unambiguous	4	2	NP_001081011.1;NP_001082364.1		CID	1	0	1	1	83.53	4.03684e-08	1	38.7357	2	2	1646.33	3291.65	2.20496	111.713	12941	12941	MS2	13/322	170307_chiba_PAF15_02.raw
	High	FSASGELGTGNVK	Unambiguous	4	2	NP_001081011.1;NP_001082364.1		CID	1	0	1	1	83.47	5.86963e-08	0	15.7536	1	2	633.82	1266.63	-0.599886	105.215	12074	12074	MS2	10/114	170307_chiba_PAF15_02.raw
	High	DLSQIGDAVVISCAK	Unambiguous	4	2	NP_001081011.1;NP_001082364.1		CID	1	0	1	1	83.28	7.25986e-08	0	34.1866	0	2	759.895	1518.78	-0.0333005	103.449	11834	11834	MS2	11/156	170307_chiba_PAF15_02.raw
	High	AEDNADTVTMVFESPNQEK	Unambiguous	4	2	NP_001081011.1;NP_001082364.1		CID	1	0	1	1	83.28	1.97356e-08	0	21.1256	0	2	1062.97	2124.94	0.183263	70.5706	7276	7276	MS2	14/206	170307_chiba_PAF15_02.raw
	High	FSASGELGTGNVK	Unambiguous	4	2	NP_001081011.1;NP_001082364.1		CID	1	0	1	1	83.26	6.93933e-08	0	49.0288	1	2	633.82	1266.63	0.0747321	94.8077	10666	10666	MS2	11/114	170307_chiba_PAF15_02.raw
	High	LSQTSNVDKEEEAVTIEMNEPVQLTFALR	Unambiguous	4	2	NP_001081011.1;NP_001082364.1		CID	1	0	1	1	83.24	3.31969e-08	1	44.1604	1	2	1646.33	3291.64	0.499053	112.463	13041	13041	MS2	11/322	170307_chiba_PAF15_02.raw
	High	FSASGELGTGNVK	Unambiguous	4	2	NP_001081011.1;NP_001082364.1		CID	1	0	1	1	83.2	6.24612e-08	0	32.2647	1	2	633.819	1266.63	-0.792634	87.7734	9701	9701	MS2	17/114	170307_chiba_PAF15_02.raw
	High	LSQTSNVDKEEEAVTIEMNEPVQLTFALR	Unambiguous	4	2	NP_001081011.1;NP_001082364.1		CID	1	0	1	1	82.74	4.23026e-08	1	2.96457	3	3	1097.89	3291.64	-0.191103	154.356	18417	18417	MS2	14/322	170307_chiba_PAF15_02.raw
	High	FSASGELGTGNVK	Unambiguous	4	2	NP_001081011.1;NP_001082364.1		CID	1	0	1	1	82.5	1.06283e-07	0	3.44903	12	2	633.82	1266.63	0.363854	152.178	18178	18178	MS2	11/114	170307_chiba_PAF15_02.raw
	High	DLSQIGDAVVISCAK	Unambiguous	4	2	NP_001081011.1;NP_001082364.1		CID	1	0	1	1	82.12	8.40854e-08	0	34.4545	1	2	759.895	1518.78	-0.595917	105.005	12045	12045	MS2	13/156	170307_chiba_PAF15_02.raw
	High	DLSQIGDAVVISCAK	Unambiguous	4	2	NP_001081011.1;NP_001082364.1		CID	1	0	1	1	81.89	1.01601e-07	0	46.8068	9	2	759.895	1518.78	-0.274422	154.542	18443	18443	MS2	10/156	170307_chiba_PAF15_02.raw
	High	DLSQIGDAVVISCAK	Unambiguous	4	2	NP_001081011.1;NP_001082364.1		CID	1	0	1	1	81.8	1.09014e-07	0	45.0807	2	2	759.895	1518.78	0.0470732	138.695	16521	16521	MS2	10/156	170307_chiba_PAF15_02.raw
	High	DLSQIGDAVVISCAK	Unambiguous	4	2	NP_001081011.1;NP_001082364.1		CID	1	0	1	1	81.78	1.07858e-07	0	47.7929	2	2	759.895	1518.78	-0.515543	143.906	17208	17208	MS2	11/156	170307_chiba_PAF15_02.raw
	High	DLSQIGDAVVISCAK	Unambiguous	4	2	NP_001081011.1;NP_001082364.1		CID	1	0	1	1	81.59	1.07134e-07	0	31.0787	2	2	759.895	1518.78	-0.0333005	137.732	16394	16394	MS2	11/156	170307_chiba_PAF15_02.raw
	High	FSASGELGTGNVK	Unambiguous	4	2	NP_001081011.1;NP_001082364.1		CID	1	0	1	1	81.48	9.35246e-08	0	25.3502	0	2	633.819	1266.63	-1.17813	79.211	8501	8501	MS2	11/114	170307_chiba_PAF15_02.raw
	High	DLSQIGDAVVISCAK	Unambiguous	4	2	NP_001081011.1;NP_001082364.1		CID	1	0	1	1	81.39	9.94765e-08	0	29.7588	0	2	759.895	1518.78	-0.595917	105.958	12174	12174	MS2	11/156	170307_chiba_PAF15_02.raw
	High	CAASDDIITLR	Unambiguous	3	1	NP_001081011.1		CID	1	0	1	1	80.94	1.80807e-07	0	10.0905	0	2	589.297	1177.59	-0.750202	56.611	5242	5242	MS2	9/90	170307_chiba_PAF15_02.raw
	High	FSASGELGTGNVK	Unambiguous	4	2	NP_001081011.1;NP_001082364.1		CID	1	0	1	1	80.9	1.06074e-07	0	41.0393	1	2	633.819	1266.63	-0.69626	99.8451	11348	11348	MS2	11/114	170307_chiba_PAF15_02.raw
	High	FSASGELGTGNVK	Unambiguous	4	2	NP_001081011.1;NP_001082364.1		CID	1	0	1	1	80.46	1.33575e-07	0	22.2423	0	2	633.82	1266.63	-0.407138	80.1023	8628	8628	MS2	10/114	170307_chiba_PAF15_02.raw
	High	DLIDEACWDITSSGISLQSMDSSHVSLVQLTLR	Unambiguous	4	2	NP_001081011.1;NP_001082364.1		CID	1	0	1	1	80.31	9.59041e-08	0	2.18394	5	3	1207.26	3619.76	0.454088	148.902	17815	17815	MS2	32/346	170307_chiba_PAF15_02.raw
	High	AEDNADTVTMVFESPNQEK	Unambiguous	4	2	NP_001081011.1;NP_001082364.1		CID	1	0	1	1	80.01	4.63931e-08	0	44.6409	1	2	1062.97	2124.94	-0.0465225	82.7734	9002	9002	MS2	20/206	170307_chiba_PAF15_02.raw
	High	FSASGELGTGNVK	Unambiguous	4	2	NP_001081011.1;NP_001082364.1		CID	1	0	1	1	79.68	1.40479e-07	0	38.4983	0	2	633.819	1266.63	-1.08176	62.6929	6144	6144	MS2	9/114	170307_chiba_PAF15_02.raw
	High	DLSQIGDAVVISCAK	Unambiguous	4	2	NP_001081011.1;NP_001082364.1		CID	1	0	1	1	79.67	1.47816e-07	0	23.6248	0	2	759.895	1518.78	-0.756665	91.9534	10280	10280	MS2	17/156	170307_chiba_PAF15_02.raw
	High	DLIDEACWDITSSGISLQSMDSSHVSLVQLTLR	Unambiguous	4	2	NP_001081011.1;NP_001082364.1		CID	1	0	1	1	79.6	1.12389e-07	0	14.9971	23	3	1207.26	3619.76	0.656428	153.772	18351	18351	MS2	28/346	170307_chiba_PAF15_02.raw
	High	FSASGELGTGNVK	Unambiguous	4	2	NP_001081011.1;NP_001082364.1		CID	1	0	1	1	79.57	1.67268e-07	0	14.1563	1	2	633.82	1266.63	-0.21439	117.61	13726	13726	MS2	10/114	170307_chiba_PAF15_02.raw
	High	DLSQIGDAVVISCAK	Unambiguous	4	2	NP_001081011.1;NP_001082364.1		CID	1	0	1	1	79.26	1.6245e-07	0	25.5179	0	2	759.895	1518.78	-0.595917	94.2741	10595	10595	MS2	13/156	170307_chiba_PAF15_02.raw
	High	DLIDEACWDITSSGISLQSMDSSHVSLVQLTLR	Unambiguous	4	2	NP_001081011.1;NP_001082364.1		CID	1	0	1	1	79.01	1.29371e-07	0	5.85382	0	3	1207.26	3619.76	0.454088	123.914	14563	14563	MS2	28/346	170307_chiba_PAF15_02.raw
	High	AEDNADTVTMVFESPNQEK	Unambiguous	4	2	NP_001081011.1;NP_001082364.1		CID	1	0	1	1	78.96	5.01877e-08	0	3.97988	0	2	1062.97	2124.94	-0.850774	73.8078	7726	7726	MS2	11/206	170307_chiba_PAF15_02.raw
	High	DLSQIGDAVVISCAK	Unambiguous	4	2	NP_001081011.1;NP_001082364.1		CID	1	0	1	1	78.89	2.02721e-07	0	21.4764	6	2	759.895	1518.78	-0.274422	144.595	17299	17299	MS2	10/156	170307_chiba_PAF15_02.raw
	High	DLSQIGDAVVISCAK	Unambiguous	4	2	NP_001081011.1;NP_001082364.1		CID	1	0	1	1	78.86	2.04127e-07	0	26.7614	1	2	759.895	1518.78	-0.435169	107.509	12381	12381	MS2	10/156	170307_chiba_PAF15_02.raw
	High	DLIDEACWDITSSGISLQSMDSSHVSLVQLTLR	Unambiguous	4	2	NP_001081011.1;NP_001082364.1		CID	1	0	1	1	78.62	1.47022e-07	0	5.01195	0	3	1207.26	3619.76	-0.051761	125.347	14752	14752	MS2	24/346	170307_chiba_PAF15_02.raw
	High	DLSQIGDAVVISCAK	Unambiguous	4	2	NP_001081011.1;NP_001082364.1		CID	1	0	1	1	78.58	1.89986e-07	0	27.9984	1	2	759.895	1518.78	-0.676291	102.677	11730	11730	MS2	12/156	170307_chiba_PAF15_02.raw
	High	LMDLDVEQLGIPEQEYSCVIK	Unambiguous	4	2	NP_001081011.1;NP_001082364.1		CID	1	0	1	1	78.39	1.81821e-07	0	61.606	1	2	1211.6	2422.19	0.460444	103.485	11839	11839	MS2	10/214	170307_chiba_PAF15_02.raw
	High	LSQTSNVDKEEEAVTIEMNEPVQLTFALR	Unambiguous	4	2	NP_001081011.1;NP_001082364.1		CID	1	0	1	1	78.07	1.14627e-07	1	46.5767	0	2	1646.33	3291.64	0.573223	88.2195	9762	9762	MS2	10/322	170307_chiba_PAF15_02.raw
	High	LMDLDVEQLGIPEQEYSCVIK	Unambiguous	4	2	NP_001081011.1;NP_001082364.1		CID	1	0	1	1	77.97	2.33796e-07	0	50.95	4	2	1211.6	2422.19	-0.345903	133.94	15895	15895	MS2	10/214	170307_chiba_PAF15_02.raw
	High	DLIDEACWDITSSGISLQSMDSSHVSLVQLTLR	Unambiguous	4	2	NP_001081011.1;NP_001082364.1		CID	1	0	1	1	77.87	1.75553e-07	0	4.59245	0	3	1207.26	3619.76	0.0494089	131.041	15509	15509	MS2	17/346	170307_chiba_PAF15_02.raw
	High	LSQTSNVDKEEEAVTIEMNEPVQLTFALR	Unambiguous	4	2	NP_001081011.1;NP_001082364.1		CID	1	0	1	1	77.84	1.30728e-07	1	5.05512	0	3	1097.89	3291.64	-0.191103	90.7271	10111	10111	MS2	10/322	170307_chiba_PAF15_02.raw
	High	FSASGELGTGNVK	Unambiguous	4	2	NP_001081011.1;NP_001082364.1		CID	1	0	1	1	77.8	2.16576e-07	0	12.9269	1	2	633.819	1266.63	-0.792634	119.358	13958	13958	MS2	10/114	170307_chiba_PAF15_02.raw
	High	DLIDEACWDITSSGISLQSMDSSHVSLVQLTLR	Unambiguous	4	2	NP_001081011.1;NP_001082364.1		CID	1	0	1	1	77.73	1.81304e-07	0	14.8885	1	3	1207.26	3619.76	0.150579	118.576	13855	13855	MS2	16/346	170307_chiba_PAF15_02.raw
	High	LMDLDVEQLGIPEQEYSCVIK	Unambiguous	4	2	NP_001081011.1;NP_001082364.1		CID	1	0	1	1	77.64	2.35035e-07	0	1.86926	11	2	1211.6	2422.19	0.863617	148.122	17732	17732	MS2	10/214	170307_chiba_PAF15_02.raw
	High	DLSQIGDAVVISCAK	Unambiguous	4	2	NP_001081011.1;NP_001082364.1		CID	1	0	1	1	77.56	2.85006e-07	0	34.5007	1	2	759.895	1518.78	-0.515543	112.099	12992	12992	MS2	11/156	170307_chiba_PAF15_02.raw
	High	DLSQIGDAVVISCAK	Unambiguous	4	2	NP_001081011.1;NP_001082364.1		CID	1	0	1	1	77.49	3.26175e-07	0	26.6361	5	2	759.896	1518.78	0.690063	144.494	17286	17286	MS2	11/156	170307_chiba_PAF15_02.raw
	High	LSQTSNVDKEEEAVTIEMNEPVQLTFALR	Unambiguous	4	2	NP_001081011.1;NP_001082364.1		CID	1	0	1	1	77.29	1.50244e-07	1	3.81953	0	3	1097.89	3291.64	-0.0798481	123.755	14542	14542	MS2	10/322	170307_chiba_PAF15_02.raw
	High	DLSQIGDAVVISCAK	Unambiguous	4	2	NP_001081011.1;NP_001082364.1		CID	1	0	1	1	77.28	3.20822e-07	0	24.6216	1	2	759.896	1518.78	0.368568	116.021	13515	13515	MS2	19/156	170307_chiba_PAF15_02.raw
	High	LSQTSNVDKEEEAVTIEMNEPVQLTFALR	Unambiguous	4	2	NP_001081011.1;NP_001082364.1		CID	1	0	1	1	77.24	1.51983e-07	1	6.71266	0	3	1097.89	3291.64	-0.0798481	132.292	15676	15676	MS2	10/322	170307_chiba_PAF15_02.raw
	High	AEDNADTVTMVFESPNQEK	Unambiguous	4	2	NP_001081011.1;NP_001082364.1		CID	1	0	1	1	77.08	8.71686e-08	0	58.3928	2	2	1062.97	2124.94	0.872621	83.6201	9121	9121	MS2	17/206	170307_chiba_PAF15_02.raw
	High	FSASGELGTGNVK	Unambiguous	4	2	NP_001081011.1;NP_001082364.1		CID	1	0	1	1	77.02	2.61171e-07	0	51.0148	1	2	633.819	1266.63	-1.2745	98.9779	11230	11230	MS2	11/114	170307_chiba_PAF15_02.raw
	High	DLSQIGDAVVISCAK	Unambiguous	4	2	NP_001081011.1;NP_001082364.1		CID	1	0	1	1	76.98	3.66818e-07	0	39.4563	2	2	759.896	1518.78	0.690063	139.797	16665	16665	MS2	10/156	170307_chiba_PAF15_02.raw
	High	LMDLDVEQLGIPEQEYSCVIK	Unambiguous	4	2	NP_001081011.1;NP_001082364.1		CID	1	0	1	1	76.96	2.54736e-07	0	14.3075	1	2	1211.6	2422.19	0.561238	109.263	12614	12614	MS2	10/214	170307_chiba_PAF15_02.raw
	High	DLSQIGDAVVISCAK	Unambiguous	4	2	NP_001081011.1;NP_001082364.1		CID	1	0	1	1	76.86	3.40004e-07	0	40.5755	8	2	759.895	1518.78	0.0470732	145.387	17399	17399	MS2	10/156	170307_chiba_PAF15_02.raw
	High	DLIDEACWDITSSGISLQSMDSSHVSLVQLTLR	Unambiguous	4	2	NP_001081011.1;NP_001082364.1		CID	1	0	1	1	76.86	2.23578e-07	0	13.6126	27	3	1207.26	3619.76	-0.355271	154.09	18386	18386	MS2	24/346	170307_chiba_PAF15_02.raw
	High	FSASGELGTGNVK	Unambiguous	4	2	NP_001081011.1;NP_001082364.1		CID	1	0	1	1	76.73	3.15302e-07	0	10.8169	1	2	633.82	1266.63	-0.407138	115.446	13437	13437	MS2	9/114	170307_chiba_PAF15_02.raw
	High	DLIDEACWDITSSGISLQSMDSSHVSLVQLTLR	Unambiguous	4	2	NP_001081011.1;NP_001082364.1		CID	1	0	1	1	76.63	2.32479e-07	0	5.89387	0	3	1207.26	3619.76	-0.051761	137.554	16370	16370	MS2	27/346	170307_chiba_PAF15_02.raw
	High	FSASGELGTGNVK	Unambiguous	4	2	NP_001081011.1;NP_001082364.1		CID	1	0	1	1	76.62	2.84191e-07	0	33.3734	1	2	633.82	1266.63	-0.503512	102.091	11651	11651	MS2	10/114	170307_chiba_PAF15_02.raw
	High	DLSQIGDAVVISCAK	Unambiguous	4	2	NP_001081011.1;NP_001082364.1		CID	1	0	1	1	76.49	3.74728e-07	0	51.7843	2	2	759.895	1518.78	0.207821	140.586	16770	16770	MS2	10/156	170307_chiba_PAF15_02.raw
	High	AEDNADTVTMVFESPNQEK	Unambiguous	4	2	NP_001081011.1;NP_001082364.1		CID	1	0	1	1	76.47	8.90424e-08	0	27.1094	1	2	1062.97	2124.94	-0.850774	79.3974	8529	8529	MS2	15/206	170307_chiba_PAF15_02.raw
	High	DLSQIGDAVVISCAK	Unambiguous	4	2	NP_001081011.1;NP_001082364.1		CID	1	0	1	1	76.42	4.17303e-07	0	37.7861	1	2	759.896	1518.78	0.690063	142.995	17086	17086	MS2	10/156	170307_chiba_PAF15_02.raw
	High	AEDNADTVTMVFESPNQEK	Unambiguous	4	2	NP_001081011.1;NP_001082364.1		CID	1	0	1	1	76.29	1.09258e-07	0	2.48255	0	2	1062.97	2124.94	0.0683705	69.8155	7171	7171	MS2	9/206	170307_chiba_PAF15_02.raw
	High	VLEALKDLIDEACWDITSSGISLQSMDSSHVSLVQLTLR	Unambiguous	4	2	NP_001081011.1;NP_001082364.1		CID	1	0	1	1	76.23	1.07204e-07	1	11.734	0	3	1425.06	4273.18	0.957129	142.291	16994	16994	MS2	19/438	170307_chiba_PAF15_02.raw
	High	DLSQIGDAVVISCAK	Unambiguous	4	2	NP_001081011.1;NP_001082364.1		CID	1	0	1	1	75.94	4.6607e-07	0	49.8367	2	2	759.896	1518.78	0.529315	137.903	16416	16416	MS2	11/156	170307_chiba_PAF15_02.raw
	High	DLSQIGDAVVISCAK	Unambiguous	4	2	NP_001081011.1;NP_001082364.1		CID	1	0	1	1	75.84	4.235e-07	0	19.4118	0	2	759.895	1518.78	-0.515543	93.4988	10490	10490	MS2	20/156	170307_chiba_PAF15_02.raw
	High	VLEALKDLIDEACWDITSSGISLQSMDSSHVSLVQLTLR	Unambiguous	4	2	NP_001081011.1;NP_001082364.1		CID	1	0	1	1	75.65	1.11631e-07	1	14.7706	2	3	1425.06	4273.17	-0.0712702	144.239	17252	17252	MS2	10/438	170307_chiba_PAF15_02.raw
	High	FSASGELGTGNVK	Unambiguous	4	2	NP_001081011.1;NP_001082364.1		CID	1	0	1	1	75.52	3.66109e-07	0	55.4359	1	2	633.819	1266.63	-0.889008	98.1714	11121	11121	MS2	11/114	170307_chiba_PAF15_02.raw
	High	DLIDEACWDITSSGISLQSMDSSHVSLVQLTLR	Unambiguous	4	2	NP_001081011.1;NP_001082364.1		CID	1	0	1	1	75.37	2.8169e-07	0	11.9665	7	3	1207.26	3619.77	0.959937	147.099	17609	17609	MS2	23/346	170307_chiba_PAF15_02.raw
	High	DLIDEACWDITSSGISLQSMDSSHVSLVQLTLR	Unambiguous	4	2	NP_001081011.1;NP_001082364.1		CID	1	0	1	1	74.97	3.34341e-07	0	7.0136	0	3	1207.26	3619.76	-0.152931	128.637	15193	15193	MS2	20/346	170307_chiba_PAF15_02.raw
	High	LSQTSNVDKEEEAVTIEMNEPVQLTFALR	Unambiguous	4	2	NP_001081011.1;NP_001082364.1		CID	1	0	1	1	74.88	2.29187e-07	1	41.632	1	2	1646.33	3291.64	0.424883	110.291	12752	12752	MS2	11/322	170307_chiba_PAF15_02.raw
	High	AEDNADTVTMVFESPNQEK	Unambiguous	4	2	NP_001081011.1;NP_001082364.1		CID	1	0	1	1	74.76	1.3702e-07	0	36.3385	0	3	708.984	2124.94	-0.770932	63.7082	6296	6296	MS2	24/206	170307_chiba_PAF15_02.raw
	High	DLIDEACWDITSSGISLQSMDSSHVSLVQLTLR	Unambiguous	4	2	NP_001081011.1;NP_001082364.1		CID	1	0	1	1	74.6	3.77943e-07	0	6.31259	0	3	1207.26	3619.76	0.251749	131.821	15613	15613	MS2	27/346	170307_chiba_PAF15_02.raw
	High	DLIDEACWDITSSGISLQSMDSSHVSLVQLTLR	Unambiguous	4	2	NP_001081011.1;NP_001082364.1		CID	1	0	1	1	74.56	3.76191e-07	0	25.9845	0	3	1207.26	3619.76	0.150579	143.124	17103	17103	MS2	22/346	170307_chiba_PAF15_02.raw
	High	DLSQIGDAVVISCAK	Unambiguous	4	2	NP_001081011.1;NP_001082364.1		CID	1	0	1	1	74.5	6.08505e-07	0	52.9257	2	2	759.896	1518.78	0.368568	141.556	16897	16897	MS2	13/156	170307_chiba_PAF15_02.raw
	High	AEDNADTVTMVFESPNQEK	Unambiguous	4	2	NP_001081011.1;NP_001082364.1		CID	1	0	1	1	74.5	1.64988e-07	0	12.1782	2	2	1062.97	2124.94	0.0683705	84.402	9235	9235	MS2	18/206	170307_chiba_PAF15_02.raw
	High	VLEALKDLIDEACWDITSSGISLQSMDSSHVSLVQLTLR	Unambiguous	4	2	NP_001081011.1;NP_001082364.1		CID	1	0	1	1	74.36	1.48407e-07	1	25.1583	1	3	1425.06	4273.17	0.18583	143.147	17106	17106	MS2	26/438	170307_chiba_PAF15_02.raw
	High	AEDNADTVTMVFESPNQEK	Unambiguous	4	2	NP_001081011.1;NP_001082364.1		CID	1	0	1	1	74.25	1.48456e-07	0	3.38884	0	3	708.984	2124.94	-0.943272	65.1117	6499	6499	MS2	23/206	170307_chiba_PAF15_02.raw
	High	DLSQIGDAVVISCAK	Unambiguous	4	2	NP_001081011.1;NP_001082364.1		CID	1	0	1	1	74.14	6.61095e-07	0	34.0934	1	2	759.896	1518.78	0.368568	116.979	13642	13642	MS2	17/156	170307_chiba_PAF15_02.raw
	High	LSQTSNVDKEEEAVTIEMNEPVQLTFALR	Unambiguous	4	2	NP_001081011.1;NP_001082364.1		CID	1	0	1	1	73.96	2.97325e-07	1	7.98418	1	3	1097.88	3291.64	-0.524868	145.507	17414	17414	MS2	10/322	170307_chiba_PAF15_02.raw
	High	DLSQIGDAVVISCAK	Unambiguous	4	2	NP_001081011.1;NP_001082364.1		CID	1	0	1	1	73.94	6.66015e-07	0	37.6358	0	2	759.895	1518.78	0.0470732	99.4305	11291	11291	MS2	13/156	170307_chiba_PAF15_02.raw
	High	LMDLDVEQLGIPEQEYSCVIK	Unambiguous	4	2	NP_001081011.1;NP_001082364.1		CID	1	0	1	1	73.82	5.24917e-07	0	73.1081	11	2	1211.6	2422.19	0.662031	154.377	18420	18420	MS2	13/214	170307_chiba_PAF15_02.raw
	High	LSQTSNVDKEEEAVTIEMNEPVQLTFALR	Unambiguous	4	2	NP_001081011.1;NP_001082364.1		CID	1	0	1	1	73.75	3.35249e-07	1	5.53379	0	3	1097.89	3291.64	-0.302358	122.174	14332	14332	MS2	10/322	170307_chiba_PAF15_02.raw
	High	LSQTSNVDKEEEAVTIEMNEPVQLTFALR	Unambiguous	4	2	NP_001081011.1;NP_001082364.1		CID	1	0	1	1	73.4	3.40531e-07	1	0	8	3	1097.89	3291.64	0.698935	152.226	18184	18184	MS2	10/322	170307_chiba_PAF15_02.raw
	High	LSQTSNVDKEEEAVTIEMNEPVQLTFALR	Unambiguous	4	2	NP_001081011.1;NP_001082364.1		CID	1	0	1	1	73.16	3.71955e-07	1	3.16371	0	3	1097.88	3291.64	-0.636123	119.799	14017	14017	MS2	10/322	170307_chiba_PAF15_02.raw
	High	LSQTSNVDKEEEAVTIEMNEPVQLTFALR	Unambiguous	4	2	NP_001081011.1;NP_001082364.1		CID	1	0	1	1	73.13	3.86694e-07	1	5.32308	0	3	1097.88	3291.64	-0.969887	121.383	14227	14227	MS2	10/322	170307_chiba_PAF15_02.raw
	High	LSQTSNVDKEEEAVTIEMNEPVQLTFALR	Unambiguous	4	2	NP_001081011.1;NP_001082364.1		CID	1	0	1	1	72.79	4.94456e-07	1	16.1325	26	3	1097.89	3291.65	1.58897	153.22	18294	18294	MS2	9/322	170307_chiba_PAF15_02.raw
	High	AEDNADTVTMVFESPNQEK	Unambiguous	4	2	NP_001081011.1;NP_001082364.1		CID	1	0	1	1	72.13	2.38817e-07	0	37.6241	2	2	1062.97	2124.94	0.298156	82.9828	9031	9031	MS2	17/206	170307_chiba_PAF15_02.raw
	High	DLSQIGDAVVISCAK	Unambiguous	4	2	NP_001081011.1;NP_001082364.1		CID	1	0	1	1	71.74	9.17742e-07	0	45.5082	26	2	759.895	1518.78	-0.756665	152.185	18179	18179	MS2	10/156	170307_chiba_PAF15_02.raw
	High	AEDNADTVTMVFESPNQEK	Unambiguous	4	2	NP_001081011.1;NP_001082364.1		CID	1	0	1	1	71.72	3.19664e-07	0	0	2	2	1062.97	2124.94	-0.161416	93.6209	10507	10507	MS2	9/206	170307_chiba_PAF15_02.raw
	High	LSQTSNVDKEEEAVTIEMNEPVQLTFALR	Unambiguous	4	2	NP_001081011.1;NP_001082364.1		CID	1	0	1	1	71.65	5.4371e-07	1	8.94909	0	3	1097.89	3291.64	-0.191103	143.876	17204	17204	MS2	12/322	170307_chiba_PAF15_02.raw
	High	FSASGELGTGNVK	Unambiguous	4	2	NP_001081011.1;NP_001082364.1		CID	1	0	1	1	71.24	9.80868e-07	0	34.9564	0	2	633.819	1266.63	-0.792634	61.5808	5977	5977	MS2	11/114	170307_chiba_PAF15_02.raw
	High	DLIDEACWDITSSGISLQSMDSSHVSLVQLTLR	Unambiguous	4	2	NP_001081011.1;NP_001082364.1		CID	1	0	1	1	71.13	7.47776e-07	0	4.18445	7	3	1207.26	3619.77	0.959937	149.72	17899	17899	MS2	20/346	170307_chiba_PAF15_02.raw
	High	LMDLDVEQLGIPEQEYSCVIK	Unambiguous	4	2	NP_001081011.1;NP_001082364.1		CID	1	0	1	1	70.82	1.19638e-06	0	8.296	0	2	1211.6	2422.19	-0.54749	91.5365	10222	10222	MS2	9/214	170307_chiba_PAF15_02.raw
	High	LSQTSNVDKEEEAVTIEMNEPVQLTFALR	Unambiguous	4	2	NP_001081011.1;NP_001082364.1		CID	1	0	1	1	70.52	7.05289e-07	1	7.0893	0	3	1097.89	3291.64	-0.191103	134.679	15992	15992	MS2	14/322	170307_chiba_PAF15_02.raw
	High	LMDLDVEQLGIPEQEYSCVIK	Unambiguous	4	2	NP_001081011.1;NP_001082364.1		CID	1	0	1	1	70.51	1.29823e-06	0	25.1381	1	2	1211.6	2422.19	-0.648284	106.746	12280	12280	MS2	9/214	170307_chiba_PAF15_02.raw
	High	DLSQIGDAVVISCAK	Unambiguous	4	2	NP_001081011.1;NP_001082364.1		CID	1	0	1	1	70.36	1.44511e-06	0	49.6035	2	2	759.895	1518.78	-0.435169	135.975	16162	16162	MS2	11/156	170307_chiba_PAF15_02.raw
	High	LMDLDVEQLGIPEQEYSCVIK	Unambiguous	4	2	NP_001081011.1;NP_001082364.1		CID	1	0	1	1	70.33	1.36244e-06	0	67.9731	3	2	1211.6	2422.19	0.158064	142.042	16962	16962	MS2	22/214	170307_chiba_PAF15_02.raw
	High	FSASGELGTGNVK	Unambiguous	4	2	NP_001081011.1;NP_001082364.1		CID	1	0	1	1	70.32	1.45848e-06	0	20.4449	1	2	633.82	1266.63	-0.310764	84.0154	9179	9179	MS2	10/114	170307_chiba_PAF15_02.raw
	High	LMDLDVEQLGIPEQEYSCVIK	Unambiguous	4	2	NP_001081011.1;NP_001082364.1		CID	1	0	1	1	70.31	1.35942e-06	0	58.6943	3	2	1211.6	2422.19	-0.24511	126.838	14952	14952	MS2	9/214	170307_chiba_PAF15_02.raw
	High	DLSQIGDAVVISCAK	Unambiguous	4	2	NP_001081011.1;NP_001082364.1		CID	1	0	1	1	70.1	1.63199e-06	0	36.373	1	2	759.895	1518.78	0.127447	103.611	11856	11856	MS2	9/156	170307_chiba_PAF15_02.raw
	High	LSQTSNVDKEEEAVTIEMNEPVQLTFALR	Unambiguous	4	2	NP_001081011.1;NP_001082364.1		CID	1	0	1	1	69.79	7.71414e-07	1	7.0638	0	3	1097.89	3291.64	0.58768	138.516	16497	16497	MS2	10/322	170307_chiba_PAF15_02.raw
	High	ATPLSPTVILSMSADIPLVVEYK	Unambiguous	3	2	NP_001081011.1;NP_001082364.1		CID	1	0	1	1	69.69	8.37712e-07	0	2.32995	0	3	815.45	2444.34	0.323484	139.3	16600	16600	MS2	10/214	170307_chiba_PAF15_02.raw
	High	DLSQIGDAVVISCAK	Unambiguous	4	2	NP_001081011.1;NP_001082364.1		CID	1	0	1	1	69.59	1.72544e-06	0	48.5735	1	2	759.895	1518.78	-0.274422	110.679	12804	12804	MS2	12/156	170307_chiba_PAF15_02.raw
	High	DLIDEACWDITSSGISLQSMDSSHVSLVQLTLR	Unambiguous	4	2	NP_001081011.1;NP_001082364.1		CID	1	0	1	1	69.56	1.18962e-06	0	11.1515	0	3	1207.26	3619.76	0.0494089	143.884	17205	17205	MS2	26/346	170307_chiba_PAF15_02.raw
	High	DLIDEACWDITSSGISLQSMDSSHVSLVQLTLR	Unambiguous	4	2	NP_001081011.1;NP_001082364.1		CID	1	0	1	1	69.27	1.27177e-06	0	10.2556	2	3	1207.26	3619.76	0.0494089	145.365	17396	17396	MS2	20/346	170307_chiba_PAF15_02.raw
	High	DLSQIGDAVVISCAK	Unambiguous	4	2	NP_001081011.1;NP_001082364.1		CID	1	0	1	1	69.06	2.07356e-06	0	41.9111	1	2	759.896	1518.78	0.288194	115.13	13394	13394	MS2	19/156	170307_chiba_PAF15_02.raw
	High	DLIDEACWDITSSGISLQSMDSSHVSLVQLTLR	Unambiguous	4	2	NP_001081011.1;NP_001082364.1		CID	1	0	1	1	68.8	1.41713e-06	0	3.95134	0	3	1207.26	3619.76	0.150579	137.078	16307	16307	MS2	26/346	170307_chiba_PAF15_02.raw
	High	LSQTSNVDKEEEAVTIEMNEPVQLTFALR	Unambiguous	4	2	NP_001081011.1;NP_001082364.1		CID	1	0	1	1	68.78	9.27039e-07	1	3.78957	0	3	1097.89	3291.64	0.0314067	111.279	12883	12883	MS2	17/322	170307_chiba_PAF15_02.raw
	High	DLSQIGDAVVISCAK	Unambiguous	4	2	NP_001081011.1;NP_001082364.1		CID	1	0	1	1	68.43	1.96662e-06	0	22.7492	1	2	759.895	1518.78	-0.917413	101.942	11630	11630	MS2	12/156	170307_chiba_PAF15_02.raw
	High	AEDNADTVTMVFESPNQEK	Unambiguous	4	2	NP_001081011.1;NP_001082364.1		CID	1	0	1	1	68.22	6.7044e-07	0	51.0499	5	2	1062.97	2124.94	0.757728	139.683	16650	16650	MS2	9/206	170307_chiba_PAF15_02.raw
	High	LMDLDVEQLGIPEQEYSCVIK	Unambiguous	4	2	NP_001081011.1;NP_001082364.1		CID	1	0	1	1	67.96	2.34335e-06	0	43.8165	3	2	1211.6	2422.19	-0.446697	135.219	16063	16063	MS2	12/214	170307_chiba_PAF15_02.raw
	High	LSQTSNVDKEEEAVTIEMNEPVQLTFALR	Unambiguous	4	2	NP_001081011.1;NP_001082364.1		CID	1	0	1	1	67.86	1.21124e-06	1	6.38661	0	3	1097.88	3291.64	-0.524868	135.641	16118	16118	MS2	9/322	170307_chiba_PAF15_02.raw
	High	DLSQIGDAVVISCAK	Unambiguous	4	2	NP_001081011.1;NP_001082364.1		CID	1	0	1	1	67.84	1.87458e-06	0	44.9599	7	2	759.897	1518.79	1.73492	146.246	17503	17503	MS2	16/156	170307_chiba_PAF15_02.raw
	High	LSQTSNVDKEEEAVTIEMNEPVQLTFALR	Unambiguous	4	2	NP_001081011.1;NP_001082364.1		CID	1	0	1	1	67.81	1.2915e-06	1	6.36545	3	3	1097.89	3291.64	0.81019	147.247	17627	17627	MS2	9/322	170307_chiba_PAF15_02.raw
	High	DLSQIGDAVVISCAK	Unambiguous	4	2	NP_001081011.1;NP_001082364.1		CID	1	0	1	1	67.73	2.60572e-06	0	56.4641	2	2	759.895	1518.78	-0.0333005	134.876	16018	16018	MS2	11/156	170307_chiba_PAF15_02.raw
	High	DLSQIGDAVVISCAK	Unambiguous	4	2	NP_001081011.1;NP_001082364.1		CID	1	0	1	1	67.68	2.33733e-06	0	40.4452	0	2	759.895	1518.78	-0.676291	97.8589	11079	11079	MS2	11/156	170307_chiba_PAF15_02.raw
	High	VLEALKDLIDEACWDITSSGISLQSMDSSHVSLVQLTLR	Unambiguous	4	2	NP_001081011.1;NP_001082364.1		CID	1	0	1	1	67.64	7.74841e-07	1	14.1176	17	3	1425.06	4273.18	0.871429	148.305	17755	17755	MS2	21/438	170307_chiba_PAF15_02.raw
	High	DLSQIGDAVVISCAK	Unambiguous	4	2	NP_001081011.1;NP_001082364.1		CID	1	0	1	1	67.52	3.2393e-06	0	46.7655	1	2	759.896	1518.78	0.609689	115.431	13435	13435	MS2	16/156	170307_chiba_PAF15_02.raw
	High	LSQTSNVDKEEEAVTIEMNEPVQLTFALR	Unambiguous	4	2	NP_001081011.1;NP_001082364.1		CID	1	0	1	1	67.52	1.23908e-06	1	3.8814	0	3	1097.89	3291.64	0.0314067	140.104	16706	16706	MS2	9/322	170307_chiba_PAF15_02.raw
	High	LSQTSNVDKEEEAVTIEMNEPVQLTFALR	Unambiguous	4	2	NP_001081011.1;NP_001082364.1		CID	1	0	1	1	67.48	1.42026e-06	1	5.32231	0	3	1097.89	3291.64	-0.191103	96.9164	10951	10951	MS2	9/322	170307_chiba_PAF15_02.raw
	High	DLIDEACWDITSSGISLQSMDSSHVSLVQLTLR	Unambiguous	4	2	NP_001081011.1;NP_001082364.1		CID	1	0	1	1	67.37	1.99722e-06	0	8.05411	0	3	1207.26	3619.76	0.251749	129.438	15298	15298	MS2	26/346	170307_chiba_PAF15_02.raw
	High	LSQTSNVDKEEEAVTIEMNEPVQLTFALR	Unambiguous	4	2	NP_001081011.1;NP_001082364.1		CID	1	0	1	1	67.32	1.69598e-06	1	4.33871	1	3	1097.89	3291.65	2.14524	146.375	17519	17519	MS2	9/322	170307_chiba_PAF15_02.raw
	High	LSQTSNVDKEEEAVTIEMNEPVQLTFALR	Unambiguous	4	2	NP_001081011.1;NP_001082364.1		CID	1	0	1	1	67.17	1.34307e-06	1	8.94743	0	3	1097.89	3291.64	0.0314067	114.297	13283	13283	MS2	9/322	170307_chiba_PAF15_02.raw
	High	DLSQIGDAVVISCAK	Unambiguous	4	2	NP_001081011.1;NP_001082364.1		CID	1	0	1	1	67.03	3.111e-06	0	30.1823	0	2	759.895	1518.78	-0.435169	98.3287	11142	11142	MS2	13/156	170307_chiba_PAF15_02.raw
	High	DLSQIGDAVVISCAK	Unambiguous	4	2	NP_001081011.1;NP_001082364.1		CID	1	0	1	1	67	3.13256e-06	0	24.5562	0	2	759.895	1518.78	-0.435169	95.0659	10700	10700	MS2	11/156	170307_chiba_PAF15_02.raw
	High	DLIDEACWDITSSGISLQSMDSSHVSLVQLTLR	Unambiguous	4	2	NP_001081011.1;NP_001082364.1		CID	1	0	1	1	66.92	2.13397e-06	0	7.55659	0	3	1207.26	3619.76	-0.152931	136.272	16201	16201	MS2	25/346	170307_chiba_PAF15_02.raw
	High	LMDLDVEQLGIPEQEYSCVIK	Unambiguous	4	2	NP_001081011.1;NP_001082364.1		CID	1	0	1	1	66.88	3.00495e-06	0	32.9286	2	2	1211.6	2422.19	-0.446697	112.751	13079	13079	MS2	9/214	170307_chiba_PAF15_02.raw
	High	FSASGELGTGNVK	Unambiguous	4	2	NP_001081011.1;NP_001082364.1		CID	1	0	1	1	66.76	2.75176e-06	0	39.1027	1	2	633.819	1266.63	-0.69626	86.5312	9528	9528	MS2	11/114	170307_chiba_PAF15_02.raw
	High	LMDLDVEQLGIPEQEYSCVIK	Unambiguous	4	2	NP_001081011.1;NP_001082364.1		CID	1	0	1	1	66.62	3.17946e-06	0	4.79836	0	2	1211.6	2422.19	-0.648284	95.3833	10742	10742	MS2	11/214	170307_chiba_PAF15_02.raw
	High	FSASGELGTGNVK	Unambiguous	4	2	NP_001081011.1;NP_001082364.1		CID	1	0	1	1	66.61	2.84846e-06	0	44.7398	1	2	633.819	1266.63	-0.792634	87.1765	9617	9617	MS2	11/114	170307_chiba_PAF15_02.raw
	High	LMDLDVEQLGIPEQEYSCVIK	Unambiguous	4	2	NP_001081011.1;NP_001082364.1		CID	1	0	1	1	66.41	3.35983e-06	0	33.9578	2	2	1211.6	2422.19	0.158064	132.502	15704	15704	MS2	9/214	170307_chiba_PAF15_02.raw
	High	LmDLDVEQLGIPEQEYSCVIK	Unambiguous	4	2	NP_001081011.1;NP_001082364.1	M2(Oxidation)	CID	1	0	1	1	66.39	3.3983e-06	0	17.4158	0	2	1219.6	2438.18	0.440217	87.0027	9592	9592	MS2	17/214	170307_chiba_PAF15_02.raw
	High	DLSQIGDAVVISCAK	Unambiguous	4	2	NP_001081011.1;NP_001082364.1		CID	1	0	1	1	66.32	3.85021e-06	0	54.3801	2	2	759.895	1518.78	0.0470732	136.627	16248	16248	MS2	12/156	170307_chiba_PAF15_02.raw
	High	LSQTSNVDKEEEAVTIEMNEPVQLTFALR	Unambiguous	4	2	NP_001081011.1;NP_001082364.1		CID	1	0	1	1	66.25	1.75482e-06	1	27.317	1	2	1646.32	3291.64	-0.465155	103.559	11849	11849	MS2	12/322	170307_chiba_PAF15_02.raw
	High	DLIDEACWDITSSGISLQSMDSSHVSLVQLTLR	Unambiguous	4	2	NP_001081011.1;NP_001082364.1		CID	1	0	1	1	66.04	2.62574e-06	0	4.92093	0	3	1207.26	3619.76	-0.254101	123.119	14458	14458	MS2	31/346	170307_chiba_PAF15_02.raw
	High	DLSQIGDAVVISCAK	Unambiguous	4	2	NP_001081011.1;NP_001082364.1		CID	1	0	1	1	65.95	3.48113e-06	0	29.8687	0	2	759.895	1518.78	-0.756665	96.3698	10876	10876	MS2	11/156	170307_chiba_PAF15_02.raw
	High	LVQGSILK	Unambiguous	4	2	NP_001081011.1;NP_001082364.1		CID	0.5758	0	1	1	65.93	5.09264e-06	0	6.4994	0	2	429.276	857.545	-1.07054	45.7688	3580	3580	MS2	7/66	170307_chiba_PAF15_02.raw
	High	LSQTSNVDKEEEAVTIEMNEPVQLTFALR	Unambiguous	4	2	NP_001081011.1;NP_001082364.1		CID	1	0	1	1	65.73	1.8711e-06	1	3.1435	0	3	1097.89	3291.64	0.0314067	112.07	12988	12988	MS2	10/322	170307_chiba_PAF15_02.raw
	High	VLEALKDLIDEACWDITSSGISLQSMDSSHVSLVQLTLR	Unambiguous	4	2	NP_001081011.1;NP_001082364.1		CID	1	0	1	1	65.67	1.20604e-06	1	3.04485	26	3	1425.06	4273.18	0.700029	148.18	17740	17740	MS2	22/438	170307_chiba_PAF15_02.raw
	High	FSASGELGTGNVK	Unambiguous	4	2	NP_001081011.1;NP_001082364.1		CID	1	0	1	1	65.52	3.68915e-06	0	12.3078	0	2	633.819	1266.63	-1.46725	45.1513	3482	3482	MS2	8/114	170307_chiba_PAF15_02.raw
	High	LSQTSNVDKEEEAVTIEMNEPVQLTFALR	Unambiguous	4	2	NP_001081011.1;NP_001082364.1		CID	1	0	1	1	65.46	2.00535e-06	1	5.04892	0	3	1097.89	3291.64	0.365171	99.2469	11266	11266	MS2	10/322	170307_chiba_PAF15_02.raw
	High	LMDLDVEQLGIPEQEYSCVIK	Unambiguous	4	2	NP_001081011.1;NP_001082364.1		CID	1	0	1	1	65.44	4.10064e-06	0	6.55424	36	2	1211.6	2422.19	-0.0435226	151.708	18125	18125	MS2	13/214	170307_chiba_PAF15_02.raw
	High	AEDNADTVTMVFESPNQEK	Unambiguous	4	2	NP_001081011.1;NP_001082364.1		CID	1	0	1	1	65.32	1.2485e-06	0	9.69434	0	3	708.984	2124.94	-0.684762	68.194	6945	6945	MS2	18/206	170307_chiba_PAF15_02.raw
	High	LMDLDVEQLGIPEQEYSCVIK	Unambiguous	4	2	NP_001081011.1;NP_001082364.1		CID	1	0	1	1	64.97	4.02801e-06	0	12.1315	13	2	1211.6	2422.19	0.662031	149.764	17905	17905	MS2	11/214	170307_chiba_PAF15_02.raw
	High	LSQTSNVDKEEEAVTIEMNEPVQLTFALR	Unambiguous	4	2	NP_001081011.1;NP_001082364.1		CID	1	0	1	1	64.84	2.42791e-06	1	38.8131	0	2	1646.33	3291.65	1.09241	100.533	11440	11440	MS2	12/322	170307_chiba_PAF15_02.raw
	High	DLIDEACWDITSSGISLQSMDSSHVSLVQLTLR	Unambiguous	4	2	NP_001081011.1;NP_001082364.1		CID	1	0	1	1	64.74	3.59239e-06	0	4.46774	0	3	1207.26	3619.76	-0.051761	126.131	14857	14857	MS2	39/346	170307_chiba_PAF15_02.raw
	High	FSASGELGTGNVK	Unambiguous	4	2	NP_001081011.1;NP_001082364.1		CID	1	0	1	1	64.21	4.98799e-06	0	56.5634	0	2	633.819	1266.63	-1.17813	75.8516	8016	8016	MS2	10/114	170307_chiba_PAF15_02.raw
	High	FSASGELGTGNVK	Unambiguous	4	2	NP_001081011.1;NP_001082364.1		CID	1	0	1	1	64.18	5.67187e-06	0	23.8841	1	2	633.82	1266.63	-0.407138	90.9652	10144	10144	MS2	10/114	170307_chiba_PAF15_02.raw
	High	ATPLSPTVILSMSADIPLVVEYK	Unambiguous	3	2	NP_001081011.1;NP_001082364.1		CID	1	0	1	1	64.02	3.01171e-06	0	25.4783	17	2	1222.67	2444.34	1.27784	154.291	18409	18409	MS2	15/214	170307_chiba_PAF15_02.raw
	High	LSQTSNVDKEEEAVTIEMNEPVQLTFALR	Unambiguous	4	2	NP_001081011.1;NP_001082364.1		CID	1	0	1	1	63.98	2.79961e-06	1	6.97547	0	3	1097.89	3291.64	0.142662	89.9625	10006	10006	MS2	9/322	170307_chiba_PAF15_02.raw
	High	LSQTSNVDKEEEAVTIEMNEPVQLTFALR	Unambiguous	4	2	NP_001081011.1;NP_001082364.1		CID	1	0	1	1	63.9	3.03498e-06	1	3.81389	3	3	1097.89	3291.64	0.698935	149.705	17897	17897	MS2	9/322	170307_chiba_PAF15_02.raw
	High	LSQTSNVDKEEEAVTIEMNEPVQLTFALR	Unambiguous	4	2	NP_001081011.1;NP_001082364.1		CID	1	0	1	1	63.82	3.07066e-06	1	3.72782	0	3	1097.88	3291.64	-0.524868	106.239	12211	12211	MS2	9/322	170307_chiba_PAF15_02.raw
	High	LSQTSNVDKEEEAVTIEMNEPVQLTFALR	Unambiguous	4	2	NP_001081011.1;NP_001082364.1		CID	1	0	1	1	63.75	3.24706e-06	1	2.81526	0	3	1097.88	3291.64	-0.636123	124.548	14647	14647	MS2	9/322	170307_chiba_PAF15_02.raw
	High	DLSQIGDAVVISCAK	Unambiguous	4	2	NP_001081011.1;NP_001082364.1		CID	1	0	1	1	63.73	6.65119e-06	0	29.8761	0	2	759.895	1518.78	-0.435169	100.687	11461	11461	MS2	13/156	170307_chiba_PAF15_02.raw
	High	LSQTSNVDKEEEAVTIEMNEPVQLTFALR	Unambiguous	4	2	NP_001081011.1;NP_001082364.1		CID	1	0	1	1	63.7	2.98606e-06	1	6.10601	0	3	1097.89	3291.64	0.142662	89.0635	9880	9880	MS2	9/322	170307_chiba_PAF15_02.raw
	High	VLEALKDLIDEACWDITSSGISLQSMDSSHVSLVQLTLR	Unambiguous	4	2	NP_001081011.1;NP_001082364.1		CID	1	0	1	1	63.36	2.32965e-06	1	24.6745	1	3	1425.06	4273.18	1.55703	142.865	17069	17069	MS2	27/438	170307_chiba_PAF15_02.raw
	High	LSQTSNVDKEEEAVTIEMNEPVQLTFALR	Unambiguous	4	2	NP_001081011.1;NP_001082364.1		CID	1	0	1	1	63.35	3.3985e-06	1	3.71484	3	3	1097.89	3291.64	0.58768	150.5	17982	17982	MS2	9/322	170307_chiba_PAF15_02.raw
	High	LSQTSNVDKEEEAVTIEMNEPVQLTFALR	Unambiguous	4	2	NP_001081011.1;NP_001082364.1		CID	1	0	1	1	63.34	3.6844e-06	1	4.70837	0	3	1097.89	3291.64	-0.302358	116.635	13597	13597	MS2	9/322	170307_chiba_PAF15_02.raw
	High	LMDLDVEQLGIPEQEYSCVIK	Unambiguous	4	2	NP_001081011.1;NP_001082364.1		CID	1	0	1	1	63.17	7.03644e-06	0	38.3438	0	2	1211.6	2422.19	-0.24511	103.668	11864	11864	MS2	9/214	170307_chiba_PAF15_02.raw
	High	LSQTSNVDKEEEAVTIEMNEPVQLTFALR	Unambiguous	4	2	NP_001081011.1;NP_001082364.1		CID	1	0	1	1	62.95	4.03058e-06	1	4.93687	0	3	1097.89	3291.64	-0.191103	119.009	13912	13912	MS2	9/322	170307_chiba_PAF15_02.raw
	High	LSQTSNVDKEEEAVTIEMNEPVQLTFALR	Unambiguous	4	2	NP_001081011.1;NP_001082364.1		CID	1	0	1	1	62.88	4.09607e-06	1	3.47228	0	3	1097.89	3291.64	-0.191103	110.174	12736	12736	MS2	9/322	170307_chiba_PAF15_02.raw
	High	LMDLDVEQLGIPEQEYSCVIK	Unambiguous	4	2	NP_001081011.1;NP_001082364.1		CID	1	0	1	1	62.71	7.68868e-06	0	38.6015	3	2	1211.6	2422.19	0.0572708	144.246	17253	17253	MS2	13/214	170307_chiba_PAF15_02.raw
	High	LVQGSILKK	Unambiguous	4	2	NP_001081011.1;NP_001082364.1		CID	1	0	1	1	62.67	3.89343e-06	1	9.72669	0	2	493.323	985.64	-0.992624	42.9963	3139	3139	MS2	8/76	170307_chiba_PAF15_02.raw
	High	DLSQIGDAVVISCAK	Unambiguous	4	2	NP_001081011.1;NP_001082364.1		CID	1	0	1	1	62.63	7.47688e-06	0	43.0578	1	2	759.895	1518.78	-0.595917	118.431	13835	13835	MS2	9/156	170307_chiba_PAF15_02.raw
	High	LSQTSNVDKEEEAVTIEMNEPVQLTFALR	Unambiguous	4	2	NP_001081011.1;NP_001082364.1		CID	1	0	1	1	62.52	4.17019e-06	1	0	13	3	1097.89	3291.64	0.698935	152.426	18206	18206	MS2	9/322	170307_chiba_PAF15_02.raw
	High	DLSQIGDAVVISCAK	Unambiguous	4	2	NP_001081011.1;NP_001082364.1		CID	1	0	1	1	62.2	9.39993e-06	0	38.155	0	2	759.894	1518.78	-1.07816	99.8742	11352	11352	MS2	11/156	170307_chiba_PAF15_02.raw
	High	LSQTSNVDKEEEAVTIEMNEPVQLTFALR	Unambiguous	4	2	NP_001081011.1;NP_001082364.1		CID	1	0	1	1	62.05	5.89429e-06	1	45.4835	0	2	1646.33	3291.65	1.90828	89.0916	9884	9884	MS2	12/322	170307_chiba_PAF15_02.raw
	High	ATPLSPTVILSMSADIPLVVEYK	Unambiguous	3	2	NP_001081011.1;NP_001082364.1		CID	1	0	1	1	61.9	4.84241e-06	0	5.19905	0	3	815.45	2444.34	0.0987538	124.233	14605	14605	MS2	21/214	170307_chiba_PAF15_02.raw
	High	LMDLDVEQLGIPEQEYSCVIK	Unambiguous	4	2	NP_001081011.1;NP_001082364.1		CID	1	0	1	1	61.78	9.72384e-06	0	18.627	2	2	1211.6	2422.19	-0.446697	124.957	14701	14701	MS2	20/214	170307_chiba_PAF15_02.raw
	High	LSQTSNVDKEEEAVTIEMNEPVQLTFALR	Unambiguous	4	2	NP_001081011.1;NP_001082364.1		CID	1	0	1	1	61.48	4.97849e-06	1	59.8256	1	2	1646.33	3291.65	1.16658	102.097	11652	11652	MS2	10/322	170307_chiba_PAF15_02.raw
	High	DLIDEACWDITSSGISLQSMDSSHVSLVQLTLR	Unambiguous	4	2	NP_001081011.1;NP_001082364.1		CID	1	0	1	1	61.48	7.07657e-06	0	21.6278	2	2	1810.39	3619.77	0.94679	135.286	16072	16072	MS2	9/346	170307_chiba_PAF15_02.raw
	High	DLSQIGDAVVISCAK	Unambiguous	4	2	NP_001081011.1;NP_001082364.1		CID	1	0	1	1	61.44	1.10899e-05	0	28.1662	0	2	759.895	1518.78	-0.0333005	95.6984	10785	10785	MS2	11/156	170307_chiba_PAF15_02.raw
	High	LSQTSNVDKEEEAVTIEMNEPVQLTFALR	Unambiguous	4	2	NP_001081011.1;NP_001082364.1		CID	1	0	1	1	61.42	5.22803e-06	1	33.4441	0	2	1646.33	3291.64	1.01824	90.1207	10028	10028	MS2	10/322	170307_chiba_PAF15_02.raw
	High	DLIDEACWDITSSGISLQSMDSSHVSLVQLTLR	Unambiguous	4	2	NP_001081011.1;NP_001082364.1		CID	1	0	1	1	61.4	7.6428e-06	0	3.2159	0	3	1207.26	3619.76	-0.254101	130.243	15404	15404	MS2	28/346	170307_chiba_PAF15_02.raw
	High	DLIDEACWDITSSGISLQSMDSSHVSLVQLTLR	Unambiguous	4	2	NP_001081011.1;NP_001082364.1		CID	1	0	1	1	61.23	7.91023e-06	0	3.81972	0	3	1207.26	3619.76	-0.152931	134.671	15991	15991	MS2	25/346	170307_chiba_PAF15_02.raw
	High	LSQTSNVDKEEEAVTIEMNEPVQLTFALR	Unambiguous	4	2	NP_001081011.1;NP_001082364.1		CID	1	0	1	1	60.98	7.42135e-06	1	43.0009	1	2	1646.33	3291.65	1.75994	105.281	12083	12083	MS2	13/322	170307_chiba_PAF15_02.raw
	High	VLEALKDLIDEACWDITSSGISLQSMDSSHVSLVQLTLR	Unambiguous	4	2	NP_001081011.1;NP_001082364.1		CID	1	0	1	1	60.86	4.75804e-06	1	9.45564	21	3	1425.07	4273.18	2.32832	147.824	17698	17698	MS2	9/438	170307_chiba_PAF15_02.raw
	High	DLIDEACWDITSSGISLQSMDSSHVSLVQLTLR	Unambiguous	4	2	NP_001081011.1;NP_001082364.1		CID	1	0	1	1	60.77	8.96156e-06	0	21.5522	25	3	1207.26	3619.76	-0.051761	152.82	18250	18250	MS2	31/346	170307_chiba_PAF15_02.raw
	High	DLSQIGDAVVISCAK	Unambiguous	4	2	NP_001081011.1;NP_001082364.1		CID	1	0	1	1	60.56	1.45039e-05	0	38.5884	0	2	759.895	1518.78	0.0470732	91.0312	10153	10153	MS2	11/156	170307_chiba_PAF15_02.raw
	High	LSQTSNVDKEEEAVTIEMNEPVQLTFALR	Unambiguous	4	2	NP_001081011.1;NP_001082364.1		CID	1	0	1	1	60.51	6.22441e-06	1	3.96416	0	3	1097.89	3291.64	0.0314067	96.1534	10846	10846	MS2	11/322	170307_chiba_PAF15_02.raw
	High	DLIDEACWDITSSGISLQSMDSSHVSLVQLTLR	Unambiguous	4	2	NP_001081011.1;NP_001082364.1		CID	1	0	1	1	60.35	1.13938e-05	0	25.9686	2	2	1810.39	3619.77	2.7004	133.049	15777	15777	MS2	9/346	170307_chiba_PAF15_02.raw
	High	VLEALKDLIDEACWDITSSGISLQSMDSSHVSLVQLTLR	Unambiguous	4	2	NP_001081011.1;NP_001082364.1		CID	1	0	1	1	60.28	5.01596e-06	1	26.7031	9	3	1425.07	4273.18	1.89983	144.093	17233	17233	MS2	25/438	170307_chiba_PAF15_02.raw
	High	LSQTSNVDKEEEAVTIEMNEPVQLTFALR	Unambiguous	4	2	NP_001081011.1;NP_001082364.1		CID	1	0	1	1	60.23	6.63893e-06	1	3.94863	2	3	1097.89	3291.64	0.142662	148.887	17813	17813	MS2	9/322	170307_chiba_PAF15_02.raw
	High	LSQTSNVDKEEEAVTIEMNEPVQLTFALR	Unambiguous	4	2	NP_001081011.1;NP_001082364.1		CID	1	0	1	1	59.94	8.0606e-06	1	2.07367	0	3	1097.89	3291.64	-0.302358	115.849	13492	13492	MS2	30/322	170307_chiba_PAF15_02.raw
	High	LSQTSNVDKEEEAVTIEMNEPVQLTFALR	Unambiguous	4	2	NP_001081011.1;NP_001082364.1		CID	1	0	1	1	59.81	7.31304e-06	1	4.90703	0	3	1097.89	3291.64	0.253916	100.015	11371	11371	MS2	12/322	170307_chiba_PAF15_02.raw
	High	LMDLDVEQLGIPEQEYSCVIK	Unambiguous	4	2	NP_001081011.1;NP_001082364.1		CID	1	0	1	1	59.76	1.33687e-05	0	10.2134	61	2	1211.6	2422.19	0.561238	152.058	18164	18164	MS2	18/214	170307_chiba_PAF15_02.raw
	High	LMDLDVEQLGIPEQEYSCVIK	Unambiguous	4	2	NP_001081011.1;NP_001082364.1		CID	1	0	1	1	59.75	1.52003e-05	0	34.4727	3	2	1211.6	2422.19	0.0572708	123.142	14461	14461	MS2	8/214	170307_chiba_PAF15_02.raw
	High	LMDLDVEQLGIPEQEYSCVIK	Unambiguous	4	2	NP_001081011.1;NP_001082364.1		CID	1	0	1	1	59.69	1.54117e-05	0	24.177	0	2	1211.6	2422.19	-0.849871	100.491	11434	11434	MS2	8/214	170307_chiba_PAF15_02.raw
	High	LMDLDVEQLGIPEQEYSCVIK	Unambiguous	4	2	NP_001081011.1;NP_001082364.1		CID	1	0	1	1	59.67	1.47276e-05	0	39.2958	1	2	1211.6	2422.19	-0.950664	113.566	13187	13187	MS2	8/214	170307_chiba_PAF15_02.raw
	High	LSQTSNVDKEEEAVTIEMNEPVQLTFALR	Unambiguous	4	2	NP_001081011.1;NP_001082364.1		CID	1	0	1	1	59.59	8.13264e-06	1	3.86713	0	3	1097.88	3291.64	-0.524868	97.6864	11056	11056	MS2	20/322	170307_chiba_PAF15_02.raw
	High	LMDLDVEQLGIPEQEYSCVIK	Unambiguous	4	2	NP_001081011.1;NP_001082364.1		CID	1	0	1	1	59.3	1.4745e-05	0	8.07574	13	2	1211.6	2422.19	0.460444	150.558	17991	17991	MS2	14/214	170307_chiba_PAF15_02.raw
	High	LSQTSNVDKEEEAVTIEMNEPVQLTFALR	Unambiguous	4	2	NP_001081011.1;NP_001082364.1		CID	1	0	1	1	59.23	8.35792e-06	1	4.35491	0	3	1097.89	3291.64	0.142662	107.019	12316	12316	MS2	21/322	170307_chiba_PAF15_02.raw
	High	LSQTSNVDKEEEAVTIEMNEPVQLTFALR	Unambiguous	4	2	NP_001081011.1;NP_001082364.1		CID	1	0	1	1	59.16	8.49372e-06	1	5.34316	0	3	1097.89	3291.64	0.253916	139.308	16601	16601	MS2	9/322	170307_chiba_PAF15_02.raw
	High	LMDLDVEQLGIPEQEYSCVIK	Unambiguous	4	2	NP_001081011.1;NP_001082364.1		CID	1	0	1	1	59.07	1.77767e-05	0	2.48821	0	2	1211.6	2422.19	0.0572708	96.9239	10952	10952	MS2	25/214	170307_chiba_PAF15_02.raw
	High	ATPLSPTVILSMSADIPLVVEYK	Unambiguous	3	2	NP_001081011.1;NP_001082364.1		CID	1	0	1	1	59.03	9.62699e-06	0	7.95959	30	2	1222.67	2444.34	1.07809	153.336	18305	18305	MS2	14/214	170307_chiba_PAF15_02.raw
	High	AEDNADTVTMVFESPNQEK	Unambiguous	4	2	NP_001081011.1;NP_001082364.1		CID	1	0	1	1	59.01	5.27533e-06	0	3.89989	0	3	708.985	2124.94	0.263105	69.823	7172	7172	MS2	15/206	170307_chiba_PAF15_02.raw
	High	LSQTSNVDKEEEAVTIEMNEPVQLTFALR	Unambiguous	4	2	NP_001081011.1;NP_001082364.1		CID	1	0	1	1	58.95	9.36025e-06	1	7.47081	73	3	1097.89	3291.64	0.58768	153.862	18362	18362	MS2	9/322	170307_chiba_PAF15_02.raw
	High	LMDLDVEQLGIPEQEYSCVIK	Unambiguous	4	2	NP_001081011.1;NP_001082364.1		CID	1	0	1	1	58.92	1.8722e-05	0	3.154	0	2	1211.6	2422.19	-0.648284	94.5935	10637	10637	MS2	14/214	170307_chiba_PAF15_02.raw
	High	FSASGELGTGNVK	Unambiguous	4	2	NP_001081011.1;NP_001082364.1		CID	1	0	1	1	58.85	1.71366e-05	0	48.6246	0	2	633.819	1266.63	-1.17813	91.8273	10263	10263	MS2	11/114	170307_chiba_PAF15_02.raw
	High	SDGFDTYR	Unambiguous	4	2	NP_001081011.1;NP_001082364.1		CID	1	0	1	1	58.59	2.21371e-06	0	9.65871	0	2	480.706	960.405	-0.987651	46.0747	3625	3625	MS2	7/66	170307_chiba_PAF15_02.raw
	High	AEDNADTVTMVFESPNQEK	Unambiguous	4	2	NP_001081011.1;NP_001082364.1		CID	1	0	1	1	58.45	6.64436e-06	0	1.99099	0	3	708.985	2124.94	0.00459609	69.073	7068	7068	MS2	18/206	170307_chiba_PAF15_02.raw
	High	DLIDEACWDITSSGISLQSMDSSHVSLVQLTLR	Unambiguous	4	2	NP_001081011.1;NP_001082364.1		CID	1	0	1	1	58.38	1.48115e-05	0	4.91459	0	3	1207.26	3619.76	0.555258	141.536	16894	16894	MS2	22/346	170307_chiba_PAF15_02.raw
	High	LMDLDVEQLGIPEQEYSCVIK	Unambiguous	4	2	NP_001081011.1;NP_001082364.1		CID	1	0	1	1	58.3	2.16689e-05	0	6.47263	0	2	1211.6	2422.19	-0.446697	93.8018	10531	10531	MS2	12/214	170307_chiba_PAF15_02.raw
	High	LSQTSNVDKEEEAVTIEMNEPVQLTFALR	Unambiguous	4	2	NP_001081011.1;NP_001082364.1		CID	1	0	1	1	58.16	1.0693e-05	1	3.39649	0	3	1097.89	3291.64	0.142662	107.824	12422	12422	MS2	12/322	170307_chiba_PAF15_02.raw
	High	LSQTSNVDKEEEAVTIEMNEPVQLTFALR	Unambiguous	4	2	NP_001081011.1;NP_001082364.1		CID	1	0	1	1	58.04	1.09925e-05	1	6.5922	0	3	1097.89	3291.64	0.142662	136.912	16286	16286	MS2	9/322	170307_chiba_PAF15_02.raw
	High	DLSQIGDAVVISCAK	Unambiguous	4	2	NP_001081011.1;NP_001082364.1		CID	1	0	1	1	57.93	2.60119e-05	0	52.8097	2	2	759.896	1518.78	1.01156	142.426	17012	17012	MS2	15/156	170307_chiba_PAF15_02.raw
	High	LSQTSNVDKEEEAVTIEMNEPVQLTFALR	Unambiguous	4	2	NP_001081011.1;NP_001082364.1		CID	1	0	1	1	57.89	1.30044e-05	1	37.8865	0	2	1646.33	3291.64	0.869902	97.7594	11066	11066	MS2	12/322	170307_chiba_PAF15_02.raw
	High	LSQTSNVDKEEEAVTIEMNEPVQLTFALR	Unambiguous	4	2	NP_001081011.1;NP_001082364.1		CID	1	0	1	1	57.63	1.20809e-05	1	9.19753	14	3	1097.89	3291.64	0.253916	153.244	18297	18297	MS2	11/322	170307_chiba_PAF15_02.raw
	High	AEDNADTVTMVFESPNQEK	Unambiguous	4	2	NP_001081011.1;NP_001082364.1		CID	1	0	1	1	57.56	6.92783e-06	0	2.35545	0	3	708.984	2124.94	-0.943272	66.0021	6625	6625	MS2	15/206	170307_chiba_PAF15_02.raw
	High	DLSQIGDAVVISCAK	Unambiguous	4	2	NP_001081011.1;NP_001082364.1		CID	1	0	1	1	57.32	2.89151e-05	0	3.30008	0	3	506.932	1518.78	-1.08701	84.9516	9313	9313	MS2	17/156	170307_chiba_PAF15_02.raw
	High	AEDNADTVTMVFESPNQEK	Unambiguous	4	2	NP_001081011.1;NP_001082364.1		CID	1	0	1	1	57.18	8.997e-06	0	21.0581	0	3	708.984	2124.94	-0.426253	67.7669	6883	6883	MS2	17/206	170307_chiba_PAF15_02.raw
	High	LMDLDVEQLGIPEQEYSCVIK	Unambiguous	4	2	NP_001081011.1;NP_001082364.1		CID	1	0	1	1	57.1	2.74928e-05	0	46.9774	4	2	1211.6	2422.19	0.258858	137.473	16359	16359	MS2	8/214	170307_chiba_PAF15_02.raw
	High	LSQTSNVDKEEEAVTIEMNEPVQLTFALR	Unambiguous	4	2	NP_001081011.1;NP_001082364.1		CID	1	0	1	1	56.88	1.63067e-05	1	4.41678	0	3	1097.89	3291.64	-0.302358	94.5861	10636	10636	MS2	9/322	170307_chiba_PAF15_02.raw
	High	LMDLDVEQLGIPEQEYSCVIK	Unambiguous	4	2	NP_001081011.1;NP_001082364.1		CID	1	0	1	1	56.72	2.99004e-05	0	42.3643	2	2	1211.6	2422.19	0.359651	122.766	14411	14411	MS2	11/214	170307_chiba_PAF15_02.raw
	High	LMDLDVEQLGIPEQEYSCVIK	Unambiguous	4	2	NP_001081011.1;NP_001082364.1		CID	1	0	1	1	56.64	3.17569e-05	0	8.8571	0	2	1211.6	2422.19	-0.446697	92.2537	10321	10321	MS2	8/214	170307_chiba_PAF15_02.raw
	High	LSQTSNVDKEEEAVTIEMNEPVQLTFALR	Unambiguous	4	2	NP_001081011.1;NP_001082364.1		CID	1	0	1	1	56.63	1.59694e-05	1	5.492	4	3	1097.89	3291.64	0.58768	151.381	18085	18085	MS2	12/322	170307_chiba_PAF15_02.raw
	High	LSQTSNVDKEEEAVTIEMNEPVQLTFALR	Unambiguous	4	2	NP_001081011.1;NP_001082364.1		CID	1	0	1	1	56.55	1.78154e-05	1	4.44249	0	3	1097.89	3291.64	-0.0798481	110.504	12780	12780	MS2	9/322	170307_chiba_PAF15_02.raw
	High	AEDNADTVTMVFESPNQEK	Unambiguous	4	2	NP_001081011.1;NP_001082364.1		CID	1	0	1	1	56.54	9.42733e-06	0	3.28425	0	3	708.984	2124.94	-0.684762	64.2362	6373	6373	MS2	11/206	170307_chiba_PAF15_02.raw
	High	DLSQIGDAVVISCAK	Unambiguous	4	2	NP_001081011.1;NP_001082364.1		CID	1	0	1	1	56.52	3.59892e-05	0	34.1103	8	3	506.933	1518.79	1.14336	145.756	17445	17445	MS2	10/156	170307_chiba_PAF15_02.raw
	High	AEDNADTVTMVFESPNQEK	Unambiguous	4	2	NP_001081011.1;NP_001082364.1		CID	1	0	1	1	56.45	1.18894e-05	0	42.6917	25	2	1062.97	2124.94	1.67687	146.418	17525	17525	MS2	14/206	170307_chiba_PAF15_02.raw
	High	VLEALKDLIDEACWDITSSGISLQSMDSSHVSLVQLTLR	Unambiguous	4	2	NP_001081011.1;NP_001082364.1		CID	1	0	1	1	56.43	1.14892e-05	1	13.9029	1	3	1425.06	4273.18	1.29993	143.606	17168	17168	MS2	25/438	170307_chiba_PAF15_02.raw
	High	LSQTSNVDKEEEAVTIEMNEPVQLTFALR	Unambiguous	4	2	NP_001081011.1;NP_001082364.1		CID	1	0	1	1	56.41	1.67992e-05	1	13.3508	0	3	1097.89	3291.64	0.58768	143.116	17102	17102	MS2	11/322	170307_chiba_PAF15_02.raw
	High	DLSQIGDAVVISCAK	Unambiguous	4	2	NP_001081011.1;NP_001082364.1		CID	1	0	1	1	56.39	3.70828e-05	0	16.3839	17	3	506.933	1518.78	0.962517	148.15	17736	17736	MS2	7/156	170307_chiba_PAF15_02.raw
	High	LSQTSNVDKEEEAVTIEMNEPVQLTFALR	Unambiguous	4	2	NP_001081011.1;NP_001082364.1		CID	1	0	1	1	56.39	1.82544e-05	1	4.71272	0	3	1097.89	3291.64	-0.191103	88.1627	9754	9754	MS2	9/322	170307_chiba_PAF15_02.raw
	High	LMDLDVEQLGIPEQEYSCVIK	Unambiguous	4	2	NP_001081011.1;NP_001082364.1		CID	1	0	1	1	56.35	3.07055e-05	0	66.5254	4	2	1211.6	2422.19	1.36758	142.197	16982	16982	MS2	8/214	170307_chiba_PAF15_02.raw
	High	LSQTSNVDKEEEAVTIEMNEPVQLTFALR	Unambiguous	4	2	NP_001081011.1;NP_001082364.1		CID	1	0	1	1	56.3	1.86366e-05	1	3.10932	0	3	1097.89	3291.64	-0.191103	105.454	12106	12106	MS2	11/322	170307_chiba_PAF15_02.raw
	High	ATPLSPTVILSMSADIPLVVEYK	Unambiguous	3	2	NP_001081011.1;NP_001082364.1		CID	1	0	1	1	56.29	1.76222e-05	0	4.52545	0	3	815.45	2444.34	-0.0510664	127.383	15025	15025	MS2	17/214	170307_chiba_PAF15_02.raw
	High	LSQTSNVDKEEEAVTIEMNEPVQLTFALR	Unambiguous	4	2	NP_001081011.1;NP_001082364.1		CID	1	0	1	1	56.25	1.88524e-05	1	4.78575	0	3	1097.89	3291.64	-0.191103	103.906	11896	11896	MS2	9/322	170307_chiba_PAF15_02.raw
	High	LMDLDVEQLGIPEQEYSCVIK	Unambiguous	4	2	NP_001081011.1;NP_001082364.1		CID	1	0	1	1	56.24	3.47019e-05	0	54.1101	8	2	1211.6	2422.19	-0.749077	145.426	17404	17404	MS2	8/214	170307_chiba_PAF15_02.raw
	High	LSQTSNVDKEEEAVTIEMNEPVQLTFALR	Unambiguous	4	2	NP_001081011.1;NP_001082364.1		CID	1	0	1	1	56.15	1.69863e-05	1	2.52809	0	3	1097.89	3291.64	0.142662	117.431	13702	13702	MS2	9/322	170307_chiba_PAF15_02.raw
	High	DLIDEACWDITSSGISLQSMDSSHVSLVQLTLR	Unambiguous	4	2	NP_001081011.1;NP_001082364.1		CID	1	0	1	1	56.03	2.61932e-05	0	17.9319	1	2	1810.38	3619.76	-0.806821	121.993	14308	14308	MS2	9/346	170307_chiba_PAF15_02.raw
	High	LSQTSNVDKEEEAVTIEMNEPVQLTFALR	Unambiguous	4	2	NP_001081011.1;NP_001082364.1		CID	1	0	1	1	55.62	1.9191e-05	1	3.54986	0	3	1097.89	3291.64	0.142662	93.0391	10428	10428	MS2	9/322	170307_chiba_PAF15_02.raw
	High	AEDNADTVTMVFESPNQEK	Unambiguous	4	2	NP_001081011.1;NP_001082364.1		CID	1	0	1	1	55.58	1.23129e-05	0	12.0093	0	3	708.985	2124.94	0.693954	70.5901	7279	7279	MS2	16/206	170307_chiba_PAF15_02.raw
	High	DLSQIGDAVVISCAK	Unambiguous	4	2	NP_001081011.1;NP_001082364.1		CID	1	0	1	1	55.5	4.3544e-05	0	41.1295	0	2	759.895	1518.78	-0.113674	90.742	10113	10113	MS2	12/156	170307_chiba_PAF15_02.raw
	High	DLIDEACWDITSSGISLQSMDSSHVSLVQLTLR	Unambiguous	4	2	NP_001081011.1;NP_001082364.1		CID	1	0	1	1	55.49	2.92375e-05	0	7.68077	2	3	1207.26	3619.77	2.0728	146.217	17499	17499	MS2	32/346	170307_chiba_PAF15_02.raw
	High	DLIDEACWDITSSGISLQSMDSSHVSLVQLTLR	Unambiguous	4	2	NP_001081011.1;NP_001082364.1		CID	1	0	1	1	55.45	3.09335e-05	0	2.73793	0	3	1207.26	3619.76	-0.355271	120.92	14165	14165	MS2	26/346	170307_chiba_PAF15_02.raw
	High	LMDLDVEQLGIPEQEYSCVIK	Unambiguous	4	2	NP_001081011.1;NP_001082364.1		CID	1	0	1	1	55.34	4.25464e-05	0	36.7406	2	2	1211.6	2422.19	-0.144316	135.053	16041	16041	MS2	10/214	170307_chiba_PAF15_02.raw
	High	LSQTSNVDKEEEAVTIEMNEPVQLTFALR	Unambiguous	4	2	NP_001081011.1;NP_001082364.1		CID	1	0	1	1	55.04	2.44396e-05	1	3.34828	0	3	1097.88	3291.64	-0.413613	102.347	11686	11686	MS2	18/322	170307_chiba_PAF15_02.raw
	High	LSQTSNVDKEEEAVTIEMNEPVQLTFALR	Unambiguous	4	2	NP_001081011.1;NP_001082364.1		CID	1	0	1	1	54.99	2.44057e-05	1	3.91482	0	3	1097.88	3291.64	-0.636123	104.68	12001	12001	MS2	12/322	170307_chiba_PAF15_02.raw
	High	DLIDEACWDITSSGISLQSMDSSHVSLVQLTLR	Unambiguous	4	2	NP_001081011.1;NP_001082364.1		CID	1	0	1	1	54.98	3.27218e-05	0	7.52884	0	3	1207.26	3619.76	0.454088	139.953	16686	16686	MS2	24/346	170307_chiba_PAF15_02.raw
	High	LMDLDVEQLGIPEQEYSCVIK	Unambiguous	4	2	NP_001081011.1;NP_001082364.1		CID	1	0	1	1	54.96	4.64369e-05	0	5.80751	0	2	1211.6	2422.19	-0.144316	97.6938	11057	11057	MS2	14/214	170307_chiba_PAF15_02.raw
	High	DLIDEACWDITSSGISLQSMDSSHVSLVQLTLR	Unambiguous	4	2	NP_001081011.1;NP_001082364.1		CID	1	0	1	1	54.83	3.5516e-05	0	3.55508	0	3	1207.26	3619.76	-0.658781	135.473	16096	16096	MS2	26/346	170307_chiba_PAF15_02.raw
	High	LSQTSNVDKEEEAVTIEMNEPVQLTFALR	Unambiguous	4	2	NP_001081011.1;NP_001082364.1		CID	1	0	1	1	54.33	2.58284e-05	1	5.67886	0	3	1097.89	3291.64	0.0314067	100.797	11476	11476	MS2	8/322	170307_chiba_PAF15_02.raw
	High	LMDLDVEQLGIPEQEYSCVIK	Unambiguous	4	2	NP_001081011.1;NP_001082364.1		CID	1	0	1	1	54.27	5.46201e-05	0	34.8008	2	2	1211.6	2422.19	-0.648284	122.062	14317	14317	MS2	12/214	170307_chiba_PAF15_02.raw
	High	AEDNADTVTMVFESPNQEK	Unambiguous	4	2	NP_001081011.1;NP_001082364.1		CID	1	0	1	1	54.01	1.8668e-05	0	19.7191	2	2	1062.97	2124.94	-0.391202	92.5324	10360	10360	MS2	18/206	170307_chiba_PAF15_02.raw
	High	DLIDEACWDITSSGISLQSMDSSHVSLVQLTLR	Unambiguous	4	2	NP_001081011.1;NP_001082364.1		CID	1	0	1	1	53.85	4.43005e-05	0	5.38713	0	3	1207.26	3619.76	0.150579	126.914	14962	14962	MS2	29/346	170307_chiba_PAF15_02.raw
	High	DLIDEACWDITSSGISLQSMDSSHVSLVQLTLR	Unambiguous	4	2	NP_001081011.1;NP_001082364.1		CID	1	0	1	1	53.72	4.62835e-05	0	6.89016	12	3	1207.26	3619.76	0.251749	151.082	18053	18053	MS2	24/346	170307_chiba_PAF15_02.raw
	High	IADMGHVK	Unambiguous	2	2	NP_001081011.1;NP_001082364.1		CID	1	0	1	1	53.66	6.544e-05	0	6.33394	0	2	435.728	870.449	-1.13154	41.55	2908	2908	MS2	7/56	170307_chiba_PAF15_02.raw
	High	LSQTSNVDKEEEAVTIEMNEPVQLTFALR	Unambiguous	4	2	NP_001081011.1;NP_001082364.1		CID	1	0	1	1	53.63	3.20798e-05	1	5.92675	0	3	1097.88	3291.64	-0.524868	95.3759	10741	10741	MS2	8/322	170307_chiba_PAF15_02.raw
	High	LSQTSNVDKEEEAVTIEMNEPVQLTFALR	Unambiguous	4	2	NP_001081011.1;NP_001082364.1		CID	1	0	1	1	53.62	3.45436e-05	1	5.38169	0	3	1097.89	3291.64	-0.191103	127.7	15068	15068	MS2	8/322	170307_chiba_PAF15_02.raw
	High	LMDLDVEQLGIPEQEYSCVIK	Unambiguous	4	2	NP_001081011.1;NP_001082364.1		CID	1	0	1	1	53.45	6.64228e-05	0	21.1742	31	2	1211.6	2422.19	0.158064	151.424	18091	18091	MS2	11/214	170307_chiba_PAF15_02.raw
	High	LSQTSNVDKEEEAVTIEMNEPVQLTFALR	Unambiguous	4	2	NP_001081011.1;NP_001082364.1		CID	1	0	1	1	53.41	4.24114e-05	1	66.2523	3	2	1646.33	3291.65	2.05662	111.217	12875	12875	MS2	24/322	170307_chiba_PAF15_02.raw
	High	LSQTSNVDKEEEAVTIEMNEPVQLTFALR	Unambiguous	4	2	NP_001081011.1;NP_001082364.1		CID	1	0	1	1	53.38	3.58174e-05	1	4.14981	0	3	1097.88	3291.64	-0.413613	103.128	11791	11791	MS2	8/322	170307_chiba_PAF15_02.raw
	High	ATPLSPTVILSMSADIPLVVEYK	Unambiguous	3	2	NP_001081011.1;NP_001082364.1		CID	1	0	1	1	53.32	3.58501e-05	0	3.12415	1	3	815.451	2444.34	0.997674	147.406	17645	17645	MS2	9/214	170307_chiba_PAF15_02.raw
	High	LMDLDVEQLGIPEQEYSCVIK	Unambiguous	4	2	NP_001081011.1;NP_001082364.1		CID	1	0	1	1	53.27	6.89982e-05	0	47.5313	1	2	1211.6	2422.19	-0.446697	102.713	11735	11735	MS2	16/214	170307_chiba_PAF15_02.raw
	High	LMDLDVEQLGIPEQEYSCVIK	Unambiguous	4	2	NP_001081011.1;NP_001082364.1		CID	1	0	1	1	53.25	6.38754e-05	0	21.2124	3	2	1211.6	2422.19	1.0652	138.538	16500	16500	MS2	9/214	170307_chiba_PAF15_02.raw
	High	LMDLDVEQLGIPEQEYSCVIK	Unambiguous	4	2	NP_001081011.1;NP_001082364.1		CID	1	0	1	1	53.07	7.07704e-05	0	15.7315	2	2	1211.6	2422.19	-0.0435226	125.451	14766	14766	MS2	8/214	170307_chiba_PAF15_02.raw
	High	LMDLDVEQLGIPEQEYSCVIK	Unambiguous	4	2	NP_001081011.1;NP_001082364.1		CID	1	0	1	1	52.99	7.20862e-05	0	28.265	1	2	1211.6	2422.19	-0.0435226	107.523	12383	12383	MS2	12/214	170307_chiba_PAF15_02.raw
	High	DLIDEACWDITSSGISLQSMDSSHVSLVQLTLR	Unambiguous	4	2	NP_001081011.1;NP_001082364.1		CID	1	0	1	1	52.96	5.61465e-05	0	37.5008	2	2	1810.38	3619.76	-0.537034	125.794	14812	14812	MS2	9/346	170307_chiba_PAF15_02.raw
	High	LVQGSILK	Unambiguous	4	2	NP_001081011.1;NP_001082364.1		CID	1	0	1	1	52.73	0.0001064	0	9.35018	3	2	429.276	857.545	-0.928193	118.992	13910	13910	MS2	7/66	170307_chiba_PAF15_02.raw
	High	LMDLDVEQLGIPEQEYSCVIK	Unambiguous	4	2	NP_001081011.1;NP_001082364.1		CID	1	0	1	1	52.69	7.778e-05	0	39.5154	1	2	1211.6	2422.19	-0.54749	108.368	12495	12495	MS2	8/214	170307_chiba_PAF15_02.raw
	High	LVQGSILK	Unambiguous	4	2	NP_001081011.1;NP_001082364.1		CID	0.4528	0	1	1	52.57	0.000105137	0	3.11568	3	2	429.276	857.545	-0.074101	143.628	17171	17171	MS2	6/66	170307_chiba_PAF15_02.raw
	High	LMDLDVEQLGIPEQEYSCVIK	Unambiguous	4	2	NP_001081011.1;NP_001082364.1		CID	1	0	1	1	52.54	7.91204e-05	0	61.9813	2	2	1211.6	2422.18	-1.45463	143.797	17194	17194	MS2	11/214	170307_chiba_PAF15_02.raw
	High	DLSQIGDAVVISCAK	Unambiguous	4	2	NP_001081011.1;NP_001082364.1		CID	1	0	1	1	52.26	0.000108755	0	18.3732	24	3	506.933	1518.78	0.480275	149.829	17913	17913	MS2	12/156	170307_chiba_PAF15_02.raw
	High	LSQTSNVDKEEEAVTIEMNEPVQLTFALR	Unambiguous	4	2	NP_001081011.1;NP_001082364.1		CID	1	0	1	1	52.19	4.25784e-05	1	13.8501	0	3	1097.89	3291.64	0.365171	140.91	16812	16812	MS2	9/322	170307_chiba_PAF15_02.raw
	High	LMDLDVEQLGIPEQEYSCVIK	Unambiguous	4	2	NP_001081011.1;NP_001082364.1		CID	1	0	1	1	52.18	8.2629e-05	0	16.5836	0	3	808.067	2422.19	-1.05701	101.799	11611	11611	MS2	19/214	170307_chiba_PAF15_02.raw
	High	KVLEALK	Unambiguous	4	2	NP_001081011.1;NP_001082364.1		CID	0.4615	0	1	1	52.15	0.000146289	1	6.45654	0	2	400.765	800.523	-1.48222	42.8687	3118	3118	MS2	6/60	170307_chiba_PAF15_02.raw
	High	ATPLSPTVILSMSADIPLVVEYK	Unambiguous	3	2	NP_001081011.1;NP_001082364.1		CID	1	0	1	1	51.84	4.90977e-05	0	3.00516	0	3	815.45	2444.34	0.0238437	125.028	14710	14710	MS2	19/214	170307_chiba_PAF15_02.raw
	High	ATPLSPTVILSMSADIPLVVEYK	Unambiguous	3	2	NP_001081011.1;NP_001082364.1		CID	1	0	1	1	51.75	5.14625e-05	0	4.64865	0	3	815.451	2444.34	0.997674	117.113	13660	13660	MS2	18/214	170307_chiba_PAF15_02.raw
	High	LMDLDVEQLGIPEQEYSCVIK	Unambiguous	4	2	NP_001081011.1;NP_001082364.1		CID	1	0	1	1	51.71	9.88184e-05	0	24.832	1	2	1211.6	2422.19	-0.345903	126.987	14972	14972	MS2	11/214	170307_chiba_PAF15_02.raw
	High	DLIDEACWDITSSGISLQSMDSSHVSLVQLTLR	Unambiguous	4	2	NP_001081011.1;NP_001082364.1		CID	1	0	1	1	51.7	7.50452e-05	0	35.569	6	2	1810.39	3619.77	2.29572	141.035	16829	16829	MS2	9/346	170307_chiba_PAF15_02.raw
	High	DLIDEACWDITSSGISLQSMDSSHVSLVQLTLR	Unambiguous	4	2	NP_001081011.1;NP_001082364.1		CID	1	0	1	1	51.66	7.30102e-05	0	5.37212	0	3	1207.26	3619.76	-0.051761	124.708	14668	14668	MS2	29/346	170307_chiba_PAF15_02.raw
	High	DLIDEACWDITSSGISLQSMDSSHVSLVQLTLR	Unambiguous	4	2	NP_001081011.1;NP_001082364.1		CID	1	0	1	1	51.52	7.2231e-05	0	3.58214	4	3	1207.26	3619.76	0.656428	148.106	17730	17730	MS2	22/346	170307_chiba_PAF15_02.raw
	High	DLSQIGDAVVISCAK	Unambiguous	4	2	NP_001081011.1;NP_001082364.1		CID	1	0	1	1	51.48	0.000130152	0	18.7597	18	3	506.933	1518.78	0.480275	148.979	17825	17825	MS2	11/156	170307_chiba_PAF15_02.raw
	High	AEDNADTVTMVFESPNQEK	Unambiguous	4	2	NP_001081011.1;NP_001082364.1		CID	1	0	1	1	51.48	3.3427e-05	0	7.30208	0	3	708.984	2124.94	-0.340083	71.8086	7447	7447	MS2	14/206	170307_chiba_PAF15_02.raw
	High	LSQTSNVDKEEEAVTIEMNEPVQLTFALR	Unambiguous	4	2	NP_001081011.1;NP_001082364.1		CID	1	0	1	1	51.13	5.43487e-05	1	3.33681	0	3	1097.89	3291.64	0.365171	115.085	13388	13388	MS2	9/322	170307_chiba_PAF15_02.raw
	High	LMDLDVEQLGIPEQEYSCVIK	Unambiguous	4	2	NP_001081011.1;NP_001082364.1		CID	1	0	1	1	51.03	0.000107679	0	28.9734	0	2	1211.6	2422.19	-1.15225	99.7304	11332	11332	MS2	10/214	170307_chiba_PAF15_02.raw
	High	AEDNADTVTMVFESPNQEK	Unambiguous	4	2	NP_001081011.1;NP_001082364.1		CID	1	0	1	1	51.02	3.08365e-05	0	8.5921	4	2	1062.97	2124.94	0.298156	95.3562	10739	10739	MS2	10/206	170307_chiba_PAF15_02.raw
	High	ATPLSPTVILSMSADIPLVVEYK	Unambiguous	3	2	NP_001081011.1;NP_001082364.1		CID	1	0	1	1	51	5.95746e-05	0	5.6184	0	3	815.45	2444.34	0.0238437	138.501	16495	16495	MS2	20/214	170307_chiba_PAF15_02.raw
	High	SDGFDTYR	Unambiguous	4	2	NP_001081011.1;NP_001082364.1		CID	1	0	1	1	50.9	1.38181e-05	0	3.16483	0	2	480.706	960.404	-1.68672	45.2508	3497	3497	MS2	6/66	170307_chiba_PAF15_02.raw
	High	ATPLSPTVILSMSADIPLVVEYK	Unambiguous	3	2	NP_001081011.1;NP_001082364.1		CID	1	0	1	1	50.9	6.01495e-05	0	18.9374	0	3	815.45	2444.34	-0.125977	110.189	12738	12738	MS2	8/214	170307_chiba_PAF15_02.raw
	High	LMDLDVEQLGIPEQEYSCVIK	Unambiguous	4	2	NP_001081011.1;NP_001082364.1		CID	1	0	1	1	50.85	0.000104014	0	52.0303	2	2	1211.6	2422.19	0.561238	114.573	13320	13320	MS2	8/214	170307_chiba_PAF15_02.raw
	High	DLIDEACWDITSSGISLQSMDSSHVSLVQLTLR	Unambiguous	4	2	NP_001081011.1;NP_001082364.1		CID	1	0	1	1	50.85	8.96244e-05	0	5.75541	0	3	1207.26	3619.76	0.251749	140.734	16789	16789	MS2	31/346	170307_chiba_PAF15_02.raw
	High	LMDLDVEQLGIPEQEYSCVIK	Unambiguous	4	2	NP_001081011.1;NP_001082364.1		CID	1	0	1	1	50.8	0.000112288	0	7.8477	4	3	808.068	2422.19	1.05965	145.865	17458	17458	MS2	20/214	170307_chiba_PAF15_02.raw
	High	ATPLSPTVILSMSADIPLVVEYK	Unambiguous	3	2	NP_001081011.1;NP_001082364.1		CID	1	0	1	1	50.59	6.72188e-05	0	2.98712	1	3	815.451	2444.34	0.922764	149.875	17918	17918	MS2	17/214	170307_chiba_PAF15_02.raw
	High	ATPLSPTVILSMSADIPLVVEYK	Unambiguous	3	2	NP_001081011.1;NP_001082364.1		CID	1	0	1	1	50.52	6.8311e-05	0	1.81358	0	3	815.451	2444.34	1.07258	145.681	17435	17435	MS2	16/214	170307_chiba_PAF15_02.raw
	High	LSQTSNVDKEEEAVTIEMNEPVQLTFALR	Unambiguous	4	2	NP_001081011.1;NP_001082364.1		CID	1	0	1	1	50.5	7.17457e-05	1	3.53919	0	3	1097.89	3291.64	-0.0798481	113.659	13199	13199	MS2	8/322	170307_chiba_PAF15_02.raw
	High	ATPLSPTVILSMSADIPLVVEYK	Unambiguous	3	2	NP_001081011.1;NP_001082364.1		CID	1	0	1	1	50.43	7.11e-05	0	4.33469	2	3	815.451	2444.34	0.698034	151.503	18100	18100	MS2	16/214	170307_chiba_PAF15_02.raw
	High	LMDLDVEQLGIPEQEYSCVIK	Unambiguous	4	2	NP_001081011.1;NP_001082364.1		CID	1	0	1	1	50.29	0.000136569	0	29.7976	2	2	1211.6	2422.19	-0.24511	132.337	15682	15682	MS2	13/214	170307_chiba_PAF15_02.raw
	High	ATPLSPTVILSMSADIPLVVEYK	Unambiguous	3	2	NP_001081011.1;NP_001082364.1		CID	1	0	1	1	50.24	7.38065e-05	0	2.33986	0	3	815.45	2444.34	0.398394	143.252	17120	17120	MS2	8/214	170307_chiba_PAF15_02.raw
	High	LVQGSILK	Unambiguous	4	2	NP_001081011.1;NP_001082364.1		CID	0.42	0	1	1	50.2	0.000181449	0	19.0774	18	2	429.276	857.546	-0.00292678	147.69	17680	17680	MS2	6/66	170307_chiba_PAF15_02.raw
	High	LSQTSNVDKEEEAVTIEMNEPVQLTFALR	Unambiguous	4	2	NP_001081011.1;NP_001082364.1		CID	1	0	1	1	50.18	6.7158e-05	1	9.50222	0	3	1097.89	3291.64	0.0314067	130.714	15466	15466	MS2	9/322	170307_chiba_PAF15_02.raw
	High	MPSGEFAR	Unambiguous	4	2	NP_001081011.1;NP_001082364.1		CID	1	0	1	1	50.01	5.38758e-05	0	31.8354	0	2	447.71	894.413	-1.16606	44.7058	3413	3413	MS2	6/60	170307_chiba_PAF15_02.raw
	High	MPSGEFAR	Unambiguous	4	2	NP_001081011.1;NP_001082364.1		CID	1	0	1	1	50	5.4e-05	0	0	2	2	447.71	894.413	-1.2343	110.907	12834	12834	MS2	7/60	170307_chiba_PAF15_02.raw
	High	LVQGSILK	Unambiguous	4	2	NP_001081011.1;NP_001082364.1		CID	1	0	1	1	49.9	0.000204147	0	0	3	2	429.276	857.545	-0.71467	126.588	14918	14918	MS2	7/66	170307_chiba_PAF15_02.raw
	High	LMDLDVEQLGIPEQEYSCVIK	Unambiguous	4	2	NP_001081011.1;NP_001082364.1		CID	1	0	1	1	49.87	0.00014786	0	45.7706	2	2	1211.6	2422.19	-0.0435226	141.402	16877	16877	MS2	8/214	170307_chiba_PAF15_02.raw
	High	LSQTSNVDKEEEAVTIEMNEPVQLTFALR	Unambiguous	4	2	NP_001081011.1;NP_001082364.1		CID	1	0	1	1	49.82	8.28642e-05	1	7.79022	0	3	1097.89	3291.64	-0.302358	133.099	15783	15783	MS2	8/322	170307_chiba_PAF15_02.raw
	High	MPSGEFAR	Unambiguous	4	2	NP_001081011.1;NP_001082364.1		CID	1	0	1	1	49.81	4.91019e-05	0	28.1088	4	2	447.71	894.413	-0.415415	139.749	16659	16659	MS2	7/60	170307_chiba_PAF15_02.raw
	High	LMDLDVEQLGIPEQEYSCVIK	Unambiguous	4	2	NP_001081011.1;NP_001082364.1		CID	1	0	1	1	49.7	0.00015537	0	12.8509	0	3	808.067	2422.19	-0.603438	91.5563	10225	10225	MS2	20/214	170307_chiba_PAF15_02.raw
	High	LSQTSNVDKEEEAVTIEMNEPVQLTFALR	Unambiguous	4	2	NP_001081011.1;NP_001082364.1		CID	1	0	1	1	49.66	8.00261e-05	1	3.25813	0	3	1097.88	3291.64	-0.524868	92.2687	10323	10323	MS2	8/322	170307_chiba_PAF15_02.raw
	High	LMDLDVEQLGIPEQEYSCVIK	Unambiguous	4	2	NP_001081011.1;NP_001082364.1		CID	1	0	1	1	49.6	0.000160086	0	16.9732	0	2	1211.6	2422.19	-0.749077	101.927	11628	11628	MS2	7/214	170307_chiba_PAF15_02.raw
	High	LMDLDVEQLGIPEQEYSCVIK	Unambiguous	4	2	NP_001081011.1;NP_001082364.1		CID	1	0	1	1	49.59	0.000158806	0	29.2665	3	2	1211.6	2422.19	-0.54749	131.888	15622	15622	MS2	22/214	170307_chiba_PAF15_02.raw
	High	LSQTSNVDKEEEAVTIEMNEPVQLTFALR	Unambiguous	4	2	NP_001081011.1;NP_001082364.1		CID	1	0	1	1	49.53	8.24578e-05	1	5.5455	0	3	1097.88	3291.64	-0.524868	112.859	13093	13093	MS2	15/322	170307_chiba_PAF15_02.raw
	High	LMDLDVEQLGIPEQEYSCVIK	Unambiguous	4	2	NP_001081011.1;NP_001082364.1		CID	1	0	1	1	49.5	0.000157644	0	30.2697	1	2	1211.6	2422.19	0.359651	121.104	14190	14190	MS2	8/214	170307_chiba_PAF15_02.raw
	High	LSQTSNVDKEEEAVTIEMNEPVQLTFALR	Unambiguous	4	2	NP_001081011.1;NP_001082364.1		CID	1	0	1	1	49.46	8.37976e-05	1	31.3965	0	2	1646.33	3291.65	1.09241	99.7787	11339	11339	MS2	18/322	170307_chiba_PAF15_02.raw
	High	ATPLSPTVILSMSADIPLVVEYK	Unambiguous	3	2	NP_001081011.1;NP_001082364.1		CID	1	0	1	1	49.17	8.95843e-05	0	3.36936	0	3	815.45	2444.33	-0.425617	121.067	14185	14185	MS2	19/214	170307_chiba_PAF15_02.raw
	High	LMDLDVEQLGIPEQEYSCVIK	Unambiguous	4	2	NP_001081011.1;NP_001082364.1		CID	1	0	1	1	49.03	0.000183163	0	4.53186	0	3	808.067	2422.19	-0.376653	92.2613	10322	10322	MS2	14/214	170307_chiba_PAF15_02.raw
	High	LSQTSNVDKEEEAVTIEMNEPVQLTFALR	Unambiguous	4	2	NP_001081011.1;NP_001082364.1		CID	1	0	1	1	49.03	8.75181e-05	1	9.7662	0	3	1097.89	3291.64	0.476426	141.705	16917	16917	MS2	8/322	170307_chiba_PAF15_02.raw
	High	LSQTSNVDKEEEAVTIEMNEPVQLTFALR	Unambiguous	4	2	NP_001081011.1;NP_001082364.1		CID	1	0	1	1	48.89	9.1031e-05	1	37.3419	0	2	1646.33	3291.65	1.46326	89.6781	9967	9967	MS2	24/322	170307_chiba_PAF15_02.raw
	High	LVQGSILK	Unambiguous	4	2	NP_001081011.1;NP_001082364.1		CID	1	0	1	1	48.84	0.000260581	0	31.0499	22	2	429.276	857.545	-0.857018	147.203	17621	17621	MS2	7/66	170307_chiba_PAF15_02.raw
	High	LVQGSILK	Unambiguous	4	2	NP_001081011.1;NP_001082364.1		CID	1	0	1	1	48.84	0.000248172	0	14.3866	3	2	429.276	857.546	-0.00292678	141.621	16906	16906	MS2	7/66	170307_chiba_PAF15_02.raw
	High	DLSQIGDAVVISCAK	Unambiguous	4	2	NP_001081011.1;NP_001082364.1		CID	1	0	1	1	48.71	0.0002113	0	38.3719	1	2	759.895	1518.78	-0.354796	117.624	13728	13728	MS2	10/156	170307_chiba_PAF15_02.raw
	High	VSDYEMK	Unambiguous	4	2	NP_001081011.1;NP_001082364.1		CID	1	0	1	1	48.66	5.44578e-05	0	20.4897	0	2	436.197	871.386	-0.895675	42.4836	3056	3056	MS2	5/54	170307_chiba_PAF15_02.raw
	High	LMDLDVEQLGIPEQEYSCVIK	Unambiguous	4	2	NP_001081011.1;NP_001082364.1		CID	1	0	1	1	48.59	0.000198542	0	21.8985	2	2	1211.6	2422.19	0.0572708	140.011	16694	16694	MS2	11/214	170307_chiba_PAF15_02.raw
	High	LMDLDVEQLGIPEQEYSCVIK	Unambiguous	4	2	NP_001081011.1;NP_001082364.1		CID	1	0	1	1	48.53	0.000201304	0	8.20614	0	2	1211.6	2422.19	0.0572708	93.0241	10426	10426	MS2	21/214	170307_chiba_PAF15_02.raw
	High	ATPLSPTVILSMSADIPLVVEYK	Unambiguous	3	2	NP_001081011.1;NP_001082364.1		CID	1	0	1	1	48.5	0.000104528	0	4.33969	0	3	815.45	2444.34	-0.125977	114.768	13346	13346	MS2	10/214	170307_chiba_PAF15_02.raw
	High	LMDLDVEQLGIPEQEYSCVIK	Unambiguous	4	2	NP_001081011.1;NP_001082364.1		CID	1	0	1	1	48.42	0.000210065	0	1.87129	0	3	808.067	2422.19	-0.830224	95.3983	10744	10744	MS2	15/214	170307_chiba_PAF15_02.raw
	High	LMDLDVEQLGIPEQEYSCVIK	Unambiguous	4	2	NP_001081011.1;NP_001082364.1		CID	1	0	1	1	48.4	0.000211757	0	62.026	2	2	1211.6	2422.19	-0.345903	121.772	14279	14279	MS2	12/214	170307_chiba_PAF15_02.raw
	High	MPSGEFAR	Unambiguous	4	2	NP_001081011.1;NP_001082364.1		CID	1	0	1	1	48.37	7.85948e-05	0	0	2	2	447.71	894.413	-1.50726	119.775	14014	14014	MS2	7/60	170307_chiba_PAF15_02.raw
	High	LMDLDVEQLGIPEQEYSCVIK	Unambiguous	4	2	NP_001081011.1;NP_001082364.1		CID	1	0	1	1	48.33	0.000206384	0	3.00686	0	3	808.068	2422.19	0.379298	93.0318	10427	10427	MS2	16/214	170307_chiba_PAF15_02.raw
	High	LVQGSILK	Unambiguous	4	2	NP_001081011.1;NP_001082364.1		CID	1	0	1	1	48.32	0.000286365	0	48.0127	2	2	429.276	857.544	-1.71111	125.911	14828	14828	MS2	6/66	170307_chiba_PAF15_02.raw
	High	LVQGSILK	Unambiguous	4	2	NP_001081011.1;NP_001082364.1		CID	1	0	1	1	48.09	0.000309701	0	33.3557	3	2	429.276	857.544	-1.42641	126.106	14854	14854	MS2	6/66	170307_chiba_PAF15_02.raw
	High	LVQGSILK	Unambiguous	4	2	NP_001081011.1;NP_001082364.1		CID	1	0	1	1	48.01	0.000307553	0	11.5886	3	2	429.275	857.544	-2.13816	122.425	14366	14366	MS2	6/66	170307_chiba_PAF15_02.raw
	High	DLIDEACWDITSSGISLQSMDSSHVSLVQLTLR	Unambiguous	4	2	NP_001081011.1;NP_001082364.1		CID	1	0	1	1	47.77	0.000175465	0	7.88086	4	2	1810.39	3619.77	1.75615	130.34	15417	15417	MS2	9/346	170307_chiba_PAF15_02.raw
	High	LSQTSNVDK	Unambiguous	4	2	NP_001081011.1;NP_001082364.1		CID	1	0	1	1	47.62	0.000275041	0	18.0919	0	2	496.256	991.505	-0.329548	40.6702	2771	2771	MS2	6/88	170307_chiba_PAF15_02.raw
	High	ATPLSPTVILSMSADIPLVVEYK	Unambiguous	3	2	NP_001081011.1;NP_001082364.1		CID	1	0	1	1	47.61	0.000128301	0	4.03636	0	3	815.45	2444.34	-0.200887	120.275	14080	14080	MS2	18/214	170307_chiba_PAF15_02.raw
	High	ATPLSPTVILSMSADIPLVVEYK	Unambiguous	3	2	NP_001081011.1;NP_001082364.1		CID	1	0	1	1	47.54	0.000130386	0	4.05995	0	3	815.45	2444.33	-0.425617	132.925	15760	15760	MS2	7/214	170307_chiba_PAF15_02.raw
	High	LSQTSNVDKEEEAVTIEMNEPVQLTFALR	Unambiguous	4	2	NP_001081011.1;NP_001082364.1		CID	1	0	1	1	47.35	0.000129774	1	37.9684	2	2	1646.33	3291.65	1.53743	106.04	12185	12185	MS2	23/322	170307_chiba_PAF15_02.raw
	High	LMDLDVEQLGIPEQEYSCVIK	Unambiguous	4	2	NP_001081011.1;NP_001082364.1		CID	1	0	1	1	47.18	0.000262253	0	24.7647	4	2	1211.6	2422.19	0.762824	117.215	13674	13674	MS2	11/214	170307_chiba_PAF15_02.raw
	High	LSQTSNVDKEEEAVTIEMNEPVQLTFALR	Unambiguous	4	2	NP_001081011.1;NP_001082364.1		CID	1	0	1	1	47.12	0.0001543	1	7.29189	0	3	1097.89	3291.64	-0.191103	129.119	15256	15256	MS2	11/322	170307_chiba_PAF15_02.raw
	High	AEDNADTVTMVFESPNQEK	Unambiguous	4	2	NP_001081011.1;NP_001082364.1		CID	1	0	1	1	47.11	8.17051e-05	0	17.2423	0	3	708.985	2124.94	0.263105	71.0224	7339	7339	MS2	17/206	170307_chiba_PAF15_02.raw
	High	ATPLSPTVILSMSADIPLVVEYK	Unambiguous	3	2	NP_001081011.1;NP_001082364.1		CID	1	0	1	1	47.11	0.000151738	0	5.09823	0	3	815.449	2444.33	-0.949989	121.858	14290	14290	MS2	7/214	170307_chiba_PAF15_02.raw
	High	ATPLSPTVILSMSADIPLVVEYK	Unambiguous	3	2	NP_001081011.1;NP_001082364.1		CID	1	0	1	1	47.05	0.000145959	0	4.413	0	3	815.45	2444.34	-0.275797	119.486	13975	13975	MS2	18/214	170307_chiba_PAF15_02.raw
	High	LMDLDVEQLGIPEQEYSCVIK	Unambiguous	4	2	NP_001081011.1;NP_001082364.1		CID	1	0	1	1	46.9	0.000278697	0	3.80705	6	3	808.068	2422.19	0.832868	148.66	17793	17793	MS2	17/214	170307_chiba_PAF15_02.raw
	High	ATPLSPTVILSMSADIPLVVEYK	Unambiguous	3	2	NP_001081011.1;NP_001082364.1		CID	1	0	1	1	46.9	0.000159256	0	3.2952	1	3	815.45	2444.34	0.398394	150.671	18002	18002	MS2	17/214	170307_chiba_PAF15_02.raw
	High	DLIDEACWDITSSGISLQSMDSSHVSLVQLTLR	Unambiguous	4	2	NP_001081011.1;NP_001082364.1		CID	1	0	1	1	46.81	0.000199069	0	53.1232	2	3	1207.26	3619.75	-2.37867	144.854	17332	17332	MS2	21/346	170307_chiba_PAF15_02.raw
	High	DLSQIGDAVVISCAK	Unambiguous	4	2	NP_001081011.1;NP_001082364.1		CID	1	0	1	1	46.79	0.00032354	0	38.4094	1	2	759.895	1518.78	-0.0333005	117.843	13757	13757	MS2	18/156	170307_chiba_PAF15_02.raw
	High	ATPLSPTVILSMSADIPLVVEYK	Unambiguous	3	2	NP_001081011.1;NP_001082364.1		CID	1	0	1	1	46.79	0.000154964	0	14.5205	13	3	815.45	2444.33	-0.350707	154.709	18464	18464	MS2	8/214	170307_chiba_PAF15_02.raw
	High	LVQGSILK	Unambiguous	4	2	NP_001081011.1;NP_001082364.1		CID	1	0	1	1	46.78	0.000398799	0	9.70981	16	2	429.277	857.546	0.28177	149.296	17859	17859	MS2	7/66	170307_chiba_PAF15_02.raw
	High	ATPLSPTVILSMSADIPLVVEYK	Unambiguous	3	2	NP_001081011.1;NP_001082364.1		CID	1	0	1	1	46.59	0.00016446	0	4.29396	0	3	815.45	2444.34	0.0987538	136.905	16285	16285	MS2	7/214	170307_chiba_PAF15_02.raw
	High	LSQTSNVDKEEEAVTIEMNEPVQLTFALR	Unambiguous	4	2	NP_001081011.1;NP_001082364.1		CID	1	0	1	1	46.56	0.00015456	1	5.1028	0	3	1097.89	3291.64	0.0314067	128.477	15172	15172	MS2	8/322	170307_chiba_PAF15_02.raw
	High	LSQTSNVDKEEEAVTIEMNEPVQLTFALR	Unambiguous	4	2	NP_001081011.1;NP_001082364.1		CID	1	0	1	1	46.54	0.000170801	1	4.40261	0	3	1097.88	3291.64	-0.636123	122.963	14437	14437	MS2	23/322	170307_chiba_PAF15_02.raw
	High	SDGFDTYR	Unambiguous	4	2	NP_001081011.1;NP_001082364.1		CID	1	0	1	1	46.43	2.26971e-05	0	16.0404	5	2	480.707	960.406	0.156275	154.459	18431	18431	MS2	6/66	170307_chiba_PAF15_02.raw
	High	MPSGEFAR	Unambiguous	4	2	NP_001081011.1;NP_001082364.1		CID	1	0	1	1	46.23	0.000129836	0	20.99	3	2	447.711	894.414	-0.142453	134.307	15943	15943	MS2	7/60	170307_chiba_PAF15_02.raw
	High	DLIDEACWDITSSGISLQSMDSSHVSLVQLTLR	Unambiguous	4	2	NP_001081011.1;NP_001082364.1		CID	1	0	1	1	46.03	0.000268169	0	7.56077	13	3	1207.26	3619.76	0.0494089	151.97	18154	18154	MS2	22/346	170307_chiba_PAF15_02.raw
	High	MPSGEFAR	Unambiguous	4	2	NP_001081011.1;NP_001082364.1		CID	1	0	1	1	46	0.000120571	0	20.4771	0	2	447.71	894.413	-0.688377	50.7295	4344	4344	MS2	7/60	170307_chiba_PAF15_02.raw
	High	DLIDEACWDITSSGISLQSMDSSHVSLVQLTLR	Unambiguous	4	2	NP_001081011.1;NP_001082364.1		CID	1	0	1	1	45.97	0.000266841	0	5.16695	0	3	1207.26	3619.76	-0.254101	120.123	14060	14060	MS2	18/346	170307_chiba_PAF15_02.raw
	High	LMDLDVEQLGIPEQEYSCVIK	Unambiguous	4	2	NP_001081011.1;NP_001082364.1		CID	1	0	1	1	45.57	0.000406291	0	41.9966	1	2	1211.6	2422.19	-0.446697	105.186	12070	12070	MS2	9/214	170307_chiba_PAF15_02.raw
	High	YLNFFTK	Unambiguous	4	2	NP_001081011.1;NP_001082364.1		CID	1	0	1	1	45.48	0.00047709	0	0	2	2	466.747	932.486	-1.23702	120.507	14111	14111	MS2	6/56	170307_chiba_PAF15_02.raw
	High	LMDLDVEQLGIPEQEYSCVIK	Unambiguous	4	2	NP_001081011.1;NP_001082364.1		CID	1	0	1	1	45.43	0.00039096	0	52.0683	4	2	1211.6	2422.19	-0.950664	122.368	14358	14358	MS2	13/214	170307_chiba_PAF15_02.raw
	High	LMDLDVEQLGIPEQEYSCVIK	Unambiguous	4	2	NP_001081011.1;NP_001082364.1		CID	1	0	1	1	45.41	0.000421539	0	12.2436	2	2	1211.6	2422.19	-0.345903	119.537	13982	13982	MS2	18/214	170307_chiba_PAF15_02.raw
	High	LMDLDVEQLGIPEQEYSCVIK	Unambiguous	4	2	NP_001081011.1;NP_001082364.1		CID	1	0	1	1	45.34	0.000410843	0	17.1499	6	3	808.068	2422.19	0.379298	145.056	17357	17357	MS2	18/214	170307_chiba_PAF15_02.raw
	High	YLNFFTK	Unambiguous	4	2	NP_001081011.1;NP_001082364.1		CID	1	0	1	1	45.3	0.000497279	0	23.8079	3	2	466.747	932.487	-1.04066	123.066	14451	14451	MS2	6/56	170307_chiba_PAF15_02.raw
	High	YLNFFTK	Unambiguous	4	2	NP_001081011.1;NP_001082364.1		CID	1	0	1	1	45.14	0.00046848	0	12.9144	2	2	466.747	932.488	-0.1243	127.656	15062	15062	MS2	6/56	170307_chiba_PAF15_02.raw
	High	ATPLSPTVILSMSADIPLVVEYK	Unambiguous	3	2	NP_001081011.1;NP_001082364.1		CID	1	0	1	1	45.07	0.000230267	0	2.35984	0	3	815.45	2444.34	-0.125977	134.508	15970	15970	MS2	9/214	170307_chiba_PAF15_02.raw
	High	MPSGEFAR	Unambiguous	4	2	NP_001081011.1;NP_001082364.1		CID	1	0	1	1	45.05	0.000146926	0	6.978	0	2	447.71	894.413	-0.620136	43.8832	3286	3286	MS2	7/60	170307_chiba_PAF15_02.raw
	High	ATPLSPTVILSMSADIPLVVEYK	Unambiguous	3	2	NP_001081011.1;NP_001082364.1		CID	1	0	1	1	44.89	0.000240011	0	2.56145	0	3	815.45	2444.34	-0.275797	131.346	15550	15550	MS2	19/214	170307_chiba_PAF15_02.raw
	High	DLIDEACWDITSSGISLQSMDSSHVSLVQLTLR	Unambiguous	4	2	NP_001081011.1;NP_001082364.1		CID	1	0	1	1	44.76	0.000369286	0	5.95769	0	3	1207.26	3619.76	-0.456441	121.543	14248	14248	MS2	30/346	170307_chiba_PAF15_02.raw
	High	YLNFFTK	Unambiguous	4	2	NP_001081011.1;NP_001082364.1		CID	1	0	1	1	44.71	0.000517239	0	3.88176	8	2	466.747	932.488	-0.058846	146.063	17481	17481	MS2	6/56	170307_chiba_PAF15_02.raw
	High	LMDLDVEQLGIPEQEYSCVIK	Unambiguous	4	2	NP_001081011.1;NP_001082364.1		CID	1	0	1	1	44.71	0.000496955	0	44.0693	2	2	1211.6	2422.19	0.158064	139.542	16632	16632	MS2	9/214	170307_chiba_PAF15_02.raw
	High	LMDLDVEQLGIPEQEYSCVIK	Unambiguous	4	2	NP_001081011.1;NP_001082364.1		CID	1	0	1	1	44.63	0.000457985	0	41.3148	8	2	1211.6	2422.19	1.87155	146.253	17504	17504	MS2	18/214	170307_chiba_PAF15_02.raw
	High	LVQGSILK	Unambiguous	4	2	NP_001081011.1;NP_001082364.1		CID	0.3333	0	1	1	44.62	0.000688562	0	0	4	2	429.276	857.545	-0.429972	140.99	16823	16823	MS2	7/66	170307_chiba_PAF15_02.raw
	High	YLNFFTK	Unambiguous	4	2	NP_001081011.1;NP_001082364.1		CID	1	0	1	1	44.61	0.000582908	0	4.41513	2	2	466.747	932.487	-0.713388	124.524	14644	14644	MS2	6/56	170307_chiba_PAF15_02.raw
	High	DLIDEACWDITSSGISLQSMDSSHVSLVQLTLR	Unambiguous	4	2	NP_001081011.1;NP_001082364.1		CID	1	0	1	1	44.49	0.0003663	0	5.2228	0	3	1207.26	3619.76	0.454088	119.336	13955	13955	MS2	19/346	170307_chiba_PAF15_02.raw
	High	LMDLDVEQLGIPEQEYSCVIK	Unambiguous	4	2	NP_001081011.1;NP_001082364.1		CID	1	0	1	1	44.47	0.000521618	0	35.9955	3	2	1211.6	2422.19	-0.648284	136.332	16209	16209	MS2	15/214	170307_chiba_PAF15_02.raw
	High	LVQGSILK	Unambiguous	4	2	NP_001081011.1;NP_001082364.1		CID	1	0	1	1	44.4	0.000724341	0	22.3319	18	2	429.276	857.545	-0.358798	150.144	17947	17947	MS2	7/66	170307_chiba_PAF15_02.raw
	High	ATPLSPTVILSMSADIPLVVEYK	Unambiguous	3	2	NP_001081011.1;NP_001082364.1		CID	1	0	1	1	44.36	0.000298647	0	3.39035	0	3	815.45	2444.34	0.173664	144.839	17330	17330	MS2	7/214	170307_chiba_PAF15_02.raw
	High	SDGFDTYR	Unambiguous	4	2	NP_001081011.1;NP_001082364.1		CID	1	0	1	1	44.3	3.70655e-05	0	33.6841	50	2	480.707	960.406	-0.0343789	148.705	17798	17798	MS2	7/66	170307_chiba_PAF15_02.raw
	High	LVQGSILK	Unambiguous	4	2	NP_001081011.1;NP_001082364.1		CID	1	0	1	1	44.23	0.000717387	0	19.5587	10	2	429.277	857.546	0.637641	146.383	17520	17520	MS2	6/66	170307_chiba_PAF15_02.raw
	High	ATPLSPTVILSMSADIPLVVEYK	Unambiguous	3	2	NP_001081011.1;NP_001082364.1		CID	1	0	1	1	44.22	0.000295185	0	4.49492	0	3	815.45	2444.34	0.323484	118.692	13870	13870	MS2	17/214	170307_chiba_PAF15_02.raw
	High	LVQGSILK	Unambiguous	4	2	NP_001081011.1;NP_001082364.1		CID	1	0	1	1	44.19	0.000724025	0	24.7765	3	2	429.277	857.546	0.851163	137.185	16321	16321	MS2	7/66	170307_chiba_PAF15_02.raw
	High	LMDLDVEQLGIPEQEYSCVIK	Unambiguous	4	2	NP_001081011.1;NP_001082364.1		CID	1	0	1	1	44.17	0.000558924	0	21.0304	2	2	1211.6	2422.19	-0.749077	124.674	14664	14664	MS2	11/214	170307_chiba_PAF15_02.raw
	High	LVQGSILK	Unambiguous	4	2	NP_001081011.1;NP_001082364.1		CID	1	0	1	1	44.13	0.000751484	0	26.7863	3	2	429.276	857.544	-1.71111	135.708	16127	16127	MS2	7/66	170307_chiba_PAF15_02.raw
	High	LMDLDVEQLGIPEQEYSCVIK	Unambiguous	4	2	NP_001081011.1;NP_001082364.1		CID	1	0	1	1	44.06	0.000577188	0	21.9737	1	3	808.068	2422.19	0.152513	104.457	11971	11971	MS2	14/214	170307_chiba_PAF15_02.raw
	High	ATPLSPTVILSMSADIPLVVEYK	Unambiguous	3	2	NP_001081011.1;NP_001082364.1		CID	1	0	1	1	44.06	0.00029841	0	4.77986	0	3	815.451	2444.34	1.14749	116.316	13555	13555	MS2	17/214	170307_chiba_PAF15_02.raw
	High	LVQGSILK	Unambiguous	4	2	NP_001081011.1;NP_001082364.1		CID	1	0	1	1	44.04	0.000786942	0	7.68279	3	2	429.276	857.545	-0.572321	127.211	15002	15002	MS2	7/66	170307_chiba_PAF15_02.raw
	High	LMDLDVEQLGIPEQEYSCVIK	Unambiguous	4	2	NP_001081011.1;NP_001082364.1		CID	1	0	1	1	44.04	0.000538434	0	12.8979	1	2	1211.6	2422.19	-0.950664	114.698	13337	13337	MS2	15/214	170307_chiba_PAF15_02.raw
	High	DLSQIGDAVVISCAK	Unambiguous	4	2	NP_001081011.1;NP_001082364.1		CID	1	0	1	1	44.03	0.000569328	0	2.73067	0	3	506.932	1518.78	-0.966453	84.0803	9188	9188	MS2	13/156	170307_chiba_PAF15_02.raw
	High	LSQTSNVDKEEEAVTIEMNEPVQLTFALR	Unambiguous	4	2	NP_001081011.1;NP_001082364.1		CID	1	0	1	1	43.95	0.00032016	1	4.5521	0	3	1097.89	3291.64	-0.191103	125.362	14754	14754	MS2	16/322	170307_chiba_PAF15_02.raw
	High	ATPLSPTVILSMSADIPLVVEYK	Unambiguous	3	2	NP_001081011.1;NP_001082364.1		CID	1	0	1	1	43.93	0.000299386	0	2.62433	0	3	815.45	2444.34	-0.200887	128.961	15235	15235	MS2	16/214	170307_chiba_PAF15_02.raw
	High	LVQGSILK	Unambiguous	4	2	NP_001081011.1;NP_001082364.1		CID	1	0	1	1	43.91	0.000810854	0	0	3	2	429.276	857.545	-0.785844	141.824	16933	16933	MS2	7/66	170307_chiba_PAF15_02.raw
	High	ATPLSPTVILSMSADIPLVVEYK	Unambiguous	3	2	NP_001081011.1;NP_001082364.1		CID	1	0	1	1	43.91	0.000300768	0	2.62946	0	3	815.45	2444.34	-0.125977	125.819	14815	14815	MS2	13/214	170307_chiba_PAF15_02.raw
	High	MPSGEFAR	Unambiguous	4	2	NP_001081011.1;NP_001082364.1		CID	1	0	1	1	43.84	0.000218915	0	11.012	22	2	447.711	894.414	0.335229	149.309	17861	17861	MS2	6/60	170307_chiba_PAF15_02.raw
	High	MPSGEFAR	Unambiguous	4	2	NP_001081011.1;NP_001082364.1		CID	1	0	1	1	43.79	0.00019638	0	11.4355	4	2	447.71	894.414	-0.347175	137.198	16323	16323	MS2	7/60	170307_chiba_PAF15_02.raw
	High	LVQGSILK	Unambiguous	4	2	NP_001081011.1;NP_001082364.1		CID	1	0	1	1	43.77	0.000797542	0	20.0503	3	2	429.276	857.545	-0.145275	141.342	16869	16869	MS2	7/66	170307_chiba_PAF15_02.raw
	High	YLNFFTK	Unambiguous	4	2	NP_001081011.1;NP_001082364.1		CID	1	0	1	1	43.71	0.000717133	0	11.0852	2	2	466.747	932.487	-0.844296	125.11	14721	14721	MS2	6/56	170307_chiba_PAF15_02.raw
	High	ATPLSPTVILSMSADIPLVVEYK	Unambiguous	3	2	NP_001081011.1;NP_001082364.1		CID	1	0	1	1	43.64	0.000328711	0	2.13607	1	3	815.451	2444.34	1.37222	148.267	17750	17750	MS2	18/214	170307_chiba_PAF15_02.raw
	High	YLNFFTK	Unambiguous	4	2	NP_001081011.1;NP_001082364.1		CID	1	0	1	1	43.63	0.000663272	0	11.6223	9	2	466.747	932.487	-0.451571	145.294	17387	17387	MS2	6/56	170307_chiba_PAF15_02.raw
	High	LMDLDVEQLGIPEQEYSCVIK	Unambiguous	4	2	NP_001081011.1;NP_001082364.1		CID	1	0	1	1	43.62	0.000634385	0	22.6745	1	2	1211.6	2422.19	-0.24511	113.203	13139	13139	MS2	7/214	170307_chiba_PAF15_02.raw
	High	LVQGSILK	Unambiguous	4	2	NP_001081011.1;NP_001082364.1		CID	1	0	1	1	43.49	0.000893188	0	40.7815	3	2	429.276	857.545	-0.928193	123.727	14538	14538	MS2	6/66	170307_chiba_PAF15_02.raw
	High	YLNFFTK	Unambiguous	4	2	NP_001081011.1;NP_001082364.1		CID	1	0	1	1	43.49	0.000754397	0	5.62062	3	2	466.747	932.487	-0.713388	135.114	16049	16049	MS2	6/56	170307_chiba_PAF15_02.raw
	High	ATPLSPTVILSMSADIPLVVEYK	Unambiguous	3	2	NP_001081011.1;NP_001082364.1		CID	1	0	1	1	43.45	0.000354707	0	6.0217	0	3	815.451	2444.34	0.548214	141.69	16915	16915	MS2	7/214	170307_chiba_PAF15_02.raw
	High	YLNFFTK	Unambiguous	4	2	NP_001081011.1;NP_001082364.1		CID	1	0	1	1	43.44	0.000763132	0	14.6821	3	2	466.747	932.487	-1.04066	127.366	15023	15023	MS2	6/56	170307_chiba_PAF15_02.raw
	High	YLNFFTK	Unambiguous	4	2	NP_001081011.1;NP_001082364.1		CID	1	0	1	1	43.43	0.000694531	0	8.03797	2	2	466.747	932.487	-0.255208	118.476	13841	13841	MS2	6/56	170307_chiba_PAF15_02.raw
	High	ATPLSPTVILSMSADIPLVVEYK	Unambiguous	3	2	NP_001081011.1;NP_001082364.1		CID	1	0	1	1	43.41	0.000351148	0	4.7479	0	3	815.451	2444.34	1.07258	117.904	13765	13765	MS2	15/214	170307_chiba_PAF15_02.raw
	High	YLNFFTK	Unambiguous	4	2	NP_001081011.1;NP_001082364.1		CID	1	0	1	1	43.38	0.000702573	0	26.9225	7	2	466.747	932.487	-0.451571	142.274	16992	16992	MS2	6/56	170307_chiba_PAF15_02.raw
	High	LMDLDVEQLGIPEQEYSCVIK	Unambiguous	4	2	NP_001081011.1;NP_001082364.1		CID	1	0	1	1	43.34	0.000681267	0	36.2047	3	2	1211.6	2422.19	0.158064	135.408	16088	16088	MS2	14/214	170307_chiba_PAF15_02.raw
	High	MPSGEFAR	Unambiguous	4	2	NP_001081011.1;NP_001082364.1		CID	1	0	1	1	43.31	0.00024033	0	0	3	2	447.71	894.414	-0.278934	130.188	15397	15397	MS2	7/60	170307_chiba_PAF15_02.raw
	High	ATPLSPTVILSMSADIPLVVEYK	Unambiguous	3	2	NP_001081011.1;NP_001082364.1		CID	1	0	1	1	43.25	0.000369058	0	2.96299	0	3	815.45	2444.34	0.398394	140.096	16705	16705	MS2	17/214	170307_chiba_PAF15_02.raw
	High	YLNFFTK	Unambiguous	4	2	NP_001081011.1;NP_001082364.1		CID	1	0	1	1	43.11	0.000735422	0	0	2	2	466.748	932.488	0.137516	108.09	12458	12458	MS2	6/56	170307_chiba_PAF15_02.raw
	High	MPSGEFAR	Unambiguous	4	2	NP_001081011.1;NP_001082364.1		CID	1	0	1	1	43.08	0.000265701	0	7.28164	3	2	447.71	894.413	-1.2343	131.804	15611	15611	MS2	7/60	170307_chiba_PAF15_02.raw
	High	YLNFFTK	Unambiguous	4	2	NP_001081011.1;NP_001082364.1		CID	1	0	1	1	43.06	0.000832914	0	12.9932	2	2	466.747	932.487	-0.647933	131.144	15523	15523	MS2	6/56	170307_chiba_PAF15_02.raw
	High	ATPLSPTVILSMSADIPLVVEYK	Unambiguous	3	2	NP_001081011.1;NP_001082364.1		CID	1	0	1	1	43.03	0.000390724	0	6.36891	0	3	815.451	2444.34	0.772944	140.895	16810	16810	MS2	17/214	170307_chiba_PAF15_02.raw
	High	YLNFFTK	Unambiguous	4	2	NP_001081011.1;NP_001082364.1		CID	1	0	1	1	43.01	0.000842558	0	7.26643	2	2	466.747	932.486	-1.23702	135.395	16086	16086	MS2	6/56	170307_chiba_PAF15_02.raw
	High	LMDLDVEQLGIPEQEYSCVIK	Unambiguous	4	2	NP_001081011.1;NP_001082364.1		CID	1	0	1	1	42.98	0.000636928	0	55.8946	2	2	1211.6	2422.19	0.561238	118.787	13883	13883	MS2	7/214	170307_chiba_PAF15_02.raw
	High	LSQTSNVDKEEEAVTIEMNEPVQLTFALR	Unambiguous	4	2	NP_001081011.1;NP_001082364.1		CID	1	0	1	1	42.95	0.000403058	1	6.28414	0	3	1097.89	3291.64	-0.191103	133.887	15888	15888	MS2	11/322	170307_chiba_PAF15_02.raw
	High	YLNFFTK	Unambiguous	4	2	NP_001081011.1;NP_001082364.1		CID	1	0	1	1	42.93	0.000858223	0	7.48739	2	2	466.747	932.487	-0.90975	127.796	15081	15081	MS2	6/56	170307_chiba_PAF15_02.raw
	High	LSQTSNVDKEEEAVTIEMNEPVQLTFALR	Unambiguous	4	2	NP_001081011.1;NP_001082364.1		CID	1	0	1	1	42.93	0.000410011	1	6.39309	0	3	1097.89	3291.64	-0.0798481	137.711	16391	16391	MS2	11/322	170307_chiba_PAF15_02.raw
	High	YLNFFTK	Unambiguous	4	2	NP_001081011.1;NP_001082364.1		CID	1	0	1	1	42.9	0.000864171	0	16.6299	2	2	466.747	932.487	-0.713388	140.932	16815	16815	MS2	6/56	170307_chiba_PAF15_02.raw
	High	LVQGSILK	Unambiguous	4	2	NP_001081011.1;NP_001082364.1		CID	1	0	1	1	42.87	0.00103025	0	14.674	4	2	429.276	857.545	-0.857018	138.762	16530	16530	MS2	6/66	170307_chiba_PAF15_02.raw
	High	LVQGSILK	Unambiguous	4	2	NP_001081011.1;NP_001082364.1		CID	1	0	1	1	42.85	0.00103501	0	35.8345	3	2	429.276	857.545	-0.928193	132.083	15648	15648	MS2	7/66	170307_chiba_PAF15_02.raw
	High	LSQTSNVDKEEEAVTIEMNEPVQLTFALR	Unambiguous	4	2	NP_001081011.1;NP_001082364.1		CID	1	0	1	1	42.84	0.000387397	1	3.09049	2	3	1097.89	3291.64	0.698935	148.099	17729	17729	MS2	12/322	170307_chiba_PAF15_02.raw
	High	YLNFFTK	Unambiguous	4	2	NP_001081011.1;NP_001082364.1		CID	1	0	1	1	42.8	0.000884301	0	18.214	2	2	466.747	932.487	-0.975205	128.407	15162	15162	MS2	6/56	170307_chiba_PAF15_02.raw
	High	YLNFFTK	Unambiguous	4	2	NP_001081011.1;NP_001082364.1		CID	1	0	1	1	42.77	0.000808521	0	5.48681	0	2	466.747	932.487	-0.320663	67.8727	6898	6898	MS2	6/56	170307_chiba_PAF15_02.raw
	High	YLNFFTK	Unambiguous	4	2	NP_001081011.1;NP_001082364.1		CID	1	0	1	1	42.76	0.000892483	0	5.42766	2	2	466.747	932.487	-1.10611	127.481	15038	15038	MS2	6/56	170307_chiba_PAF15_02.raw
	High	YLNFFTK	Unambiguous	4	2	NP_001081011.1;NP_001082364.1		CID	1	0	1	1	42.76	0.000810385	0	5.53612	0	2	466.747	932.487	-0.386117	69.6652	7150	7150	MS2	6/56	170307_chiba_PAF15_02.raw
	High	LMDLDVEQLGIPEQEYSCVIK	Unambiguous	4	2	NP_001081011.1;NP_001082364.1		CID	1	0	1	1	42.75	0.000775091	0	4.99891	0	3	808.067	2422.19	-0.225463	96.939	10954	10954	MS2	20/214	170307_chiba_PAF15_02.raw
	High	LMDLDVEQLGIPEQEYSCVIK	Unambiguous	4	2	NP_001081011.1;NP_001082364.1		CID	1	0	1	1	42.71	0.000768868	0	33.9591	2	2	1211.6	2422.19	0.0572708	137.895	16415	16415	MS2	17/214	170307_chiba_PAF15_02.raw
	High	LVQGSILK	Unambiguous	4	2	NP_001081011.1;NP_001082364.1		CID	1	0	1	1	42.55	0.00110903	0	25.0103	3	2	429.276	857.544	-1.21289	136.572	16241	16241	MS2	7/66	170307_chiba_PAF15_02.raw
	High	ATPLSPTVILSMSADIPLVVEYK	Unambiguous	3	2	NP_001081011.1;NP_001082364.1		CID	1	0	1	1	42.52	0.000431013	0	24.7125	4	3	815.451	2444.34	1.07258	154.583	18448	18448	MS2	7/214	170307_chiba_PAF15_02.raw
	High	LMDLDVEQLGIPEQEYSCVIK	Unambiguous	4	2	NP_001081011.1;NP_001082364.1		CID	1	0	1	1	42.47	0.000801229	0	11.0914	0	3	808.068	2422.19	-0.0742723	100.968	11499	11499	MS2	19/214	170307_chiba_PAF15_02.raw
	High	DLSQIGDAVVISCAK	Unambiguous	4	2	NP_001081011.1;NP_001082364.1		CID	1	0	1	1	42.43	0.000834359	0	67.021	2	2	759.896	1518.79	1.1723	116.359	13561	13561	MS2	7/156	170307_chiba_PAF15_02.raw
	High	LMDLDVEQLGIPEQEYSCVIK	Unambiguous	4	2	NP_001081011.1;NP_001082364.1		CID	1	0	1	1	42.39	0.00082766	0	23.9273	2	2	1211.6	2422.19	-0.0435226	123.982	14572	14572	MS2	12/214	170307_chiba_PAF15_02.raw
	High	ATPLSPTVILSMSADIPLVVEYK	Unambiguous	3	2	NP_001081011.1;NP_001082364.1		CID	1	0	1	1	42.35	0.000430756	0	2.95407	0	3	815.45	2444.34	-0.200887	129.759	15340	15340	MS2	19/214	170307_chiba_PAF15_02.raw
	High	LMDLDVEQLGIPEQEYSCVIK	Unambiguous	4	2	NP_001081011.1;NP_001082364.1		CID	1	0	1	1	42.25	0.000872645	0	2.13639	0	3	808.067	2422.19	-0.376653	94.6011	10638	10638	MS2	11/214	170307_chiba_PAF15_02.raw
	High	LVQGSILK	Unambiguous	4	2	NP_001081011.1;NP_001082364.1		CID	1	0	1	1	42.23	0.00113698	0	36.616	4	2	429.277	857.546	0.352944	154.454	18430	18430	MS2	6/66	170307_chiba_PAF15_02.raw
	High	MPSGEFAR	Unambiguous	4	2	NP_001081011.1;NP_001082364.1		CID	1	0	1	1	42.16	0.000322312	0	77.1748	4	2	447.711	894.414	0.335229	126.727	14937	14937	MS2	7/60	170307_chiba_PAF15_02.raw
	High	YLNFFTK	Unambiguous	4	2	NP_001081011.1;NP_001082364.1		CID	1	0	1	1	42.15	0.000932591	0	17.4515	3	2	466.747	932.487	-0.189754	129.987	15370	15370	MS2	6/56	170307_chiba_PAF15_02.raw
	High	YLNFFTK	Unambiguous	4	2	NP_001081011.1;NP_001082364.1		CID	1	0	1	1	42.12	0.000939056	0	43.5299	3	2	466.747	932.487	-0.582479	123.732	14539	14539	MS2	6/56	170307_chiba_PAF15_02.raw
	High	LSQTSNVDKEEEAVTIEMNEPVQLTFALR	Unambiguous	4	2	NP_001081011.1;NP_001082364.1		CID	1	0	1	1	42.04	0.000481383	1	5.26476	0	3	1097.88	3291.64	-0.636123	120.59	14122	14122	MS2	11/322	170307_chiba_PAF15_02.raw
	High	YLNFFTK	Unambiguous	4	2	NP_001081011.1;NP_001082364.1		CID	1	0	1	1	42.03	0.00105584	0	19.6592	3	2	466.747	932.487	-0.844296	132.088	15649	15649	MS2	6/56	170307_chiba_PAF15_02.raw
	High	YLNFFTK	Unambiguous	4	2	NP_001081011.1;NP_001082364.1		CID	1	0	1	1	41.88	0.000992411	0	9.4842	3	2	466.747	932.488	-0.058846	137.991	16428	16428	MS2	6/56	170307_chiba_PAF15_02.raw
	High	LVQGSILK	Unambiguous	4	2	NP_001081011.1;NP_001082364.1		CID	1	0	1	1	41.82	0.00124955	0	6.40479	0	2	429.276	857.546	0.0682475	47.4225	3834	3834	MS2	6/66	170307_chiba_PAF15_02.raw
	High	LVQGSILK	Unambiguous	4	2	NP_001081011.1;NP_001082364.1		CID	1	0	1	1	41.81	0.00125243	0	31.9928	4	2	429.277	857.546	0.566467	137.529	16367	16367	MS2	7/66	170307_chiba_PAF15_02.raw
	High	YLNFFTK	Unambiguous	4	2	NP_001081011.1;NP_001082364.1		CID	1	0	1	1	41.7	0.00177472	0	14.2463	2	2	466.747	932.486	-1.6952	122.001	14309	14309	MS2	6/56	170307_chiba_PAF15_02.raw
	High	YLNFFTK	Unambiguous	4	2	NP_001081011.1;NP_001082364.1		CID	1	0	1	1	41.69	0.00114183	0	10.7899	3	2	466.747	932.487	-1.10611	129.058	15248	15248	MS2	6/56	170307_chiba_PAF15_02.raw
	High	YLNFFTK	Unambiguous	4	2	NP_001081011.1;NP_001082364.1		CID	1	0	1	1	41.67	0.00104158	0	7.01338	4	2	466.747	932.487	-0.386117	137.801	16403	16403	MS2	6/56	170307_chiba_PAF15_02.raw
	High	MPSGEFAR	Unambiguous	4	2	NP_001081011.1;NP_001082364.1		CID	1	0	1	1	41.64	0.000370164	0	19.335	3	2	447.71	894.413	-1.16606	141.959	16951	16951	MS2	7/60	170307_chiba_PAF15_02.raw
	High	MPSGEFAR	Unambiguous	4	2	NP_001081011.1;NP_001082364.1		CID	1	0	1	1	41.6	0.000373589	0	0	3	2	447.71	894.413	-1.37078	136.513	16233	16233	MS2	7/60	170307_chiba_PAF15_02.raw
	High	YLNFFTK	Unambiguous	4	2	NP_001081011.1;NP_001082364.1		CID	1	0	1	1	41.59	0.00106094	0	14.8128	2	2	466.747	932.487	-0.582479	110.45	12773	12773	MS2	6/56	170307_chiba_PAF15_02.raw
	High	YLNFFTK	Unambiguous	4	2	NP_001081011.1;NP_001082364.1		CID	1	0	1	1	41.54	0.00184132	0	28.725	3	2	466.747	932.486	-1.6952	112.99	13111	13111	MS2	6/56	170307_chiba_PAF15_02.raw
	High	YLNFFTK	Unambiguous	4	2	NP_001081011.1;NP_001082364.1		CID	1	0	1	1	41.53	0.00184556	0	21.1666	2	2	466.747	932.486	-1.56429	131.607	15584	15584	MS2	6/56	170307_chiba_PAF15_02.raw
	High	YLNFFTK	Unambiguous	4	2	NP_001081011.1;NP_001082364.1		CID	1	0	1	1	41.45	0.0010957	0	0	2	2	466.747	932.487	-0.255208	131.762	15605	15605	MS2	6/56	170307_chiba_PAF15_02.raw
	High	LVQGSILK	Unambiguous	4	2	NP_001081011.1;NP_001082364.1		CID	1	0	1	1	41.41	0.00144193	0	28.854	3	2	429.276	857.545	-0.429972	132.829	15747	15747	MS2	7/66	170307_chiba_PAF15_02.raw
	High	CAASDDIITLR	Unambiguous	3	1	NP_001081011.1		CID	1	0	1	1	41.32	0.00165659	0	69.5977	1	2	589.297	1177.59	-0.64654	61.2262	5926	5926	MS2	9/90	170307_chiba_PAF15_02.raw
	High	YLNFFTK	Unambiguous	4	2	NP_001081011.1;NP_001082364.1		CID	1	0	1	1	41.31	0.0011316	0	6.30615	0	2	466.747	932.488	0.0720623	68.7611	7024	7024	MS2	6/56	170307_chiba_PAF15_02.raw
	High	MPSGEFAR	Unambiguous	4	2	NP_001081011.1;NP_001082364.1		CID	1	0	1	1	41.3	0.000400308	0	19.8757	3	2	447.71	894.413	-1.09782	129.079	15251	15251	MS2	7/60	170307_chiba_PAF15_02.raw
	High	MPSGEFAR	Unambiguous	4	2	NP_001081011.1;NP_001082364.1		CID	1	0	1	1	41.28	0.000402155	0	22.8104	2	2	447.71	894.413	-0.893098	128.452	15169	15169	MS2	7/60	170307_chiba_PAF15_02.raw
	High	YLNFFTK	Unambiguous	4	2	NP_001081011.1;NP_001082364.1		CID	1	0	1	1	41.26	0.0011447	0	10.446	3	2	466.747	932.487	-0.582479	128.111	15123	15123	MS2	6/56	170307_chiba_PAF15_02.raw
	High	LMDLDVEQLGIPEQEYSCVIK	Unambiguous	4	2	NP_001081011.1;NP_001082364.1		CID	1	0	1	1	41.23	0.00109613	0	33.9712	3	2	1211.6	2422.19	-0.144316	136.657	16252	16252	MS2	7/214	170307_chiba_PAF15_02.raw
	High	DLIDEACWDITSSGISLQSMDSSHVSLVQLTLR	Unambiguous	4	2	NP_001081011.1;NP_001082364.1		CID	1	0	1	1	41.19	0.000737516	0	21.7089	2	2	1810.39	3619.77	1.08168	135.713	16128	16128	MS2	8/346	170307_chiba_PAF15_02.raw
	High	YLNFFTK	Unambiguous	4	2	NP_001081011.1;NP_001082364.1		CID	1	0	1	1	41.17	0.00200507	0	18.1124	2	2	466.746	932.486	-2.21884	122.122	14325	14325	MS2	6/56	170307_chiba_PAF15_02.raw
	High	LMDLDVEQLGIPEQEYSCVIK	Unambiguous	4	2	NP_001081011.1;NP_001082364.1		CID	1	0	1	1	41.15	0.000970712	0	27.2631	19	2	1211.6	2422.19	0.662031	147.322	17636	17636	MS2	7/214	170307_chiba_PAF15_02.raw
	High	YLNFFTK	Unambiguous	4	2	NP_001081011.1;NP_001082364.1		CID	1	0	1	1	41.12	0.00116288	0	16.6094	3	2	466.748	932.488	0.268425	126.416	14895	14895	MS2	6/56	170307_chiba_PAF15_02.raw
	High	SDGFDTYR	Unambiguous	4	2	NP_001081011.1;NP_001082364.1		CID	1	0	1	1	41.12	0.000131356	0	16.8099	55	2	480.707	960.407	1.23665	150.04	17935	17935	MS2	7/66	170307_chiba_PAF15_02.raw
	High	MPSGEFAR	Unambiguous	4	2	NP_001081011.1;NP_001082364.1		CID	1	0	1	1	41.09	0.00042014	0	4.4792	0	2	447.71	894.413	-1.09782	48.973	4071	4071	MS2	6/60	170307_chiba_PAF15_02.raw
	High	MPSGEFAR	Unambiguous	4	2	NP_001081011.1;NP_001082364.1		CID	1	0	1	1	41.07	0.000414263	0	7.77909	2	2	447.711	894.414	0.198749	126.552	14913	14913	MS2	7/60	170307_chiba_PAF15_02.raw
	High	YLNFFTK	Unambiguous	4	2	NP_001081011.1;NP_001082364.1		CID	1	0	1	1	41.07	0.00131704	0	25.0812	0	2	466.747	932.487	-1.04066	73.0085	7613	7613	MS2	6/56	170307_chiba_PAF15_02.raw
	High	LMDLDVEQLGIPEQEYSCVIK	Unambiguous	4	2	NP_001081011.1;NP_001082364.1		CID	1	0	1	1	41.07	0.00112164	0	37.7943	2	2	1211.6	2422.19	-0.0435226	121.299	14216	14216	MS2	8/214	170307_chiba_PAF15_02.raw
	High	ATPLSPTVILSMSADIPLVVEYK	Unambiguous	3	2	NP_001081011.1;NP_001082364.1		CID	1	0	1	1	41.02	0.000585102	0	3.42376	0	3	815.45	2444.34	-0.200887	136.11	16180	16180	MS2	25/214	170307_chiba_PAF15_02.raw
	High	DLIDEACWDITSSGISLQSMDSSHVSLVQLTLR	Unambiguous	4	2	NP_001081011.1;NP_001082364.1		CID	1	0	1	1	41.02	0.00084998	0	22.6867	0	3	1207.26	3619.76	0.0494089	133.084	15781	15781	MS2	34/346	170307_chiba_PAF15_02.raw
	High	LVQGSILK	Unambiguous	4	2	NP_001081011.1;NP_001082364.1		CID	1	0	1	1	40.99	0.00158834	0	46.7193	4	2	429.276	857.545	-0.501147	139.597	16639	16639	MS2	7/66	170307_chiba_PAF15_02.raw
	High	SDGFDTYR	Unambiguous	4	2	NP_001081011.1;NP_001082364.1		CID	1	0	1	1	40.96	7.99779e-05	0	30.7387	40	2	480.707	960.406	0.34693	148.589	17786	17786	MS2	7/66	170307_chiba_PAF15_02.raw
	High	LVQGSILK	Unambiguous	4	2	NP_001081011.1;NP_001082364.1		CID	1	0	1	1	40.91	0.00161787	0	12.4184	15	2	429.276	857.545	-0.429972	150.714	18009	18009	MS2	7/66	170307_chiba_PAF15_02.raw
	High	ATPLSPTVILSMSADIPLVVEYK	Unambiguous	3	2	NP_001081011.1;NP_001082364.1		CID	1	0	1	1	40.89	0.000639543	0	5.27256	0	3	815.45	2444.34	0.248574	122.648	14395	14395	MS2	6/214	170307_chiba_PAF15_02.raw
	High	LVQGSILK	Unambiguous	4	2	NP_001081011.1;NP_001082364.1		CID	1	0	1	1	40.79	0.00158399	0	20.1483	21	2	429.276	857.546	0.0682475	148.513	17777	17777	MS2	6/66	170307_chiba_PAF15_02.raw
	High	LSQTSNVDKEEEAVTIEMNEPVQLTFALR	Unambiguous	4	2	NP_001081011.1;NP_001082364.1		CID	1	0	1	1	40.7	0.000804325	1	24.719	1	2	1646.33	3291.65	1.90828	100.709	11464	11464	MS2	18/322	170307_chiba_PAF15_02.raw
	High	YLNFFTK	Unambiguous	4	2	NP_001081011.1;NP_001082364.1		CID	1	0	1	1	40.69	0.00130524	0	4.11587	2	2	466.747	932.488	-0.058846	130.177	15395	15395	MS2	6/56	170307_chiba_PAF15_02.raw
	High	LMDLDVEQLGIPEQEYSCVIK	Unambiguous	4	2	NP_001081011.1;NP_001082364.1		CID	1	0	1	1	40.69	0.00120287	0	31.0234	2	2	1211.6	2422.19	0.258858	118.628	13862	13862	MS2	23/214	170307_chiba_PAF15_02.raw
	High	ATPLSPTVILSMSADIPLVVEYK	Unambiguous	3	2	NP_001081011.1;NP_001082364.1		CID	1	0	1	1	40.61	0.0006691	0	2.4884	0	3	815.451	2444.34	1.07258	146.561	17540	17540	MS2	8/214	170307_chiba_PAF15_02.raw
	High	YLNFFTK	Unambiguous	4	2	NP_001081011.1;NP_001082364.1		CID	1	0	1	1	40.57	0.00230213	0	6.64752	2	2	466.747	932.486	-1.82611	130.645	15457	15457	MS2	5/56	170307_chiba_PAF15_02.raw
	High	LVQGSILK	Unambiguous	4	2	NP_001081011.1;NP_001082364.1		CID	0.1951	0	1	1	40.56	0.00175365	0	37.96	3	2	429.276	857.545	-0.928193	136.401	16218	16218	MS2	7/66	170307_chiba_PAF15_02.raw
	High	LMDLDVEQLGIPEQEYSCVIK	Unambiguous	4	2	NP_001081011.1;NP_001082364.1		CID	1	0	1	1	40.51	0.00130268	0	63.0939	3	2	1211.6	2422.19	-0.446697	130.75	15471	15471	MS2	8/214	170307_chiba_PAF15_02.raw
	High	SDGFDTYR	Unambiguous	4	2	NP_001081011.1;NP_001082364.1		CID	1	0	1	1	40.44	9.01509e-05	0	25.3887	43	2	480.707	960.406	-0.0343789	151.143	18060	18060	MS2	7/66	170307_chiba_PAF15_02.raw
	High	LMDLDVEQLGIPEQEYSCVIK	Unambiguous	4	2	NP_001081011.1;NP_001082364.1		CID	1	0	1	1	40.37	0.00133617	0	49.2973	8	3	808.067	2422.19	-0.149867	144.901	17338	17338	MS2	15/214	170307_chiba_PAF15_02.raw
	High	SDGFDTYR	Unambiguous	4	2	NP_001081011.1;NP_001082364.1		CID	1	0	1	1	40.36	9.18269e-05	0	27.318	26	2	480.707	960.406	0.219827	152.522	18217	18217	MS2	7/66	170307_chiba_PAF15_02.raw
	High	LMDLDVEQLGIPEQEYSCVIK	Unambiguous	4	2	NP_001081011.1;NP_001082364.1		CID	1	0	1	1	40.35	0.00136079	0	5.27258	12	3	808.068	2422.19	0.228108	151.074	18052	18052	MS2	17/214	170307_chiba_PAF15_02.raw
	High	LMDLDVEQLGIPEQEYSCVIK	Unambiguous	4	2	NP_001081011.1;NP_001082364.1		CID	1	0	1	1	40.32	0.00126804	0	21.8669	6	3	808.068	2422.19	0.984058	146.803	17571	17571	MS2	12/214	170307_chiba_PAF15_02.raw
	High	MPSGEFAR	Unambiguous	4	2	NP_001081011.1;NP_001082364.1		CID	1	0	1	1	40.29	0.000505119	0	38.1872	3	2	447.71	894.413	-1.16606	120.573	14120	14120	MS2	7/60	170307_chiba_PAF15_02.raw
	High	YLNFFTK	Unambiguous	4	2	NP_001081011.1;NP_001082364.1		CID	1	0	1	1	40.27	0.00143778	0	0	3	2	466.747	932.487	-0.386117	129.581	15317	15317	MS2	6/56	170307_chiba_PAF15_02.raw
	High	YLNFFTK	Unambiguous	4	2	NP_001081011.1;NP_001082364.1		CID	1	0	1	1	40.25	0.00142081	0	0	17	2	466.748	932.488	0.20297	147.705	17682	17682	MS2	6/56	170307_chiba_PAF15_02.raw
	High	LMDLDVEQLGIPEQEYSCVIK	Unambiguous	4	2	NP_001081011.1;NP_001082364.1		CID	1	0	1	1	40.24	0.00139097	0	56.2327	2	2	1211.6	2422.19	0.158064	140.785	16796	16796	MS2	20/214	170307_chiba_PAF15_02.raw
	High	YLNFFTK	Unambiguous	4	2	NP_001081011.1;NP_001082364.1		CID	1	0	1	1	40.23	0.00145108	0	12.2277	3	2	466.747	932.488	0.00660816	126.882	14958	14958	MS2	6/56	170307_chiba_PAF15_02.raw
	High	YLNFFTK	Unambiguous	4	2	NP_001081011.1;NP_001082364.1		CID	1	0	1	1	40.21	0.00145778	0	12.9654	2	2	466.747	932.488	-0.058846	122.774	14412	14412	MS2	6/56	170307_chiba_PAF15_02.raw
	High	YLNFFTK	Unambiguous	4	2	NP_001081011.1;NP_001082364.1		CID	1	0	1	1	40.19	0.00146451	0	24.9403	3	2	466.747	932.488	-0.058846	141.615	16905	16905	MS2	6/56	170307_chiba_PAF15_02.raw
	High	YLNFFTK	Unambiguous	4	2	NP_001081011.1;NP_001082364.1		CID	1	0	1	1	40.16	0.00162405	0	17.791	3	2	466.747	932.487	-1.17157	136.073	16175	16175	MS2	6/56	170307_chiba_PAF15_02.raw
	High	YLNFFTK	Unambiguous	4	2	NP_001081011.1;NP_001082364.1		CID	1	0	1	1	40.16	0.00147466	0	10.3362	3	2	466.747	932.488	-0.1243	143.488	17152	17152	MS2	6/56	170307_chiba_PAF15_02.raw
	High	ATPLSPTVILSMSADIPLVVEYK	Unambiguous	3	2	NP_001081011.1;NP_001082364.1		CID	1	0	1	1	40.16	0.000742148	0	4.17533	1	3	815.451	2444.34	0.847854	149.065	17834	17834	MS2	21/214	170307_chiba_PAF15_02.raw
	High	YLNFFTK	Unambiguous	4	2	NP_001081011.1;NP_001082364.1		CID	1	0	1	1	40.13	0.00163531	0	5.45113	3	2	466.747	932.487	-0.844296	132.834	15748	15748	MS2	6/56	170307_chiba_PAF15_02.raw
	High	SDGFDTYR	Unambiguous	4	2	NP_001081011.1;NP_001082364.1		CID	1	0	1	1	40.11	0.000165748	0	27.7037	55	2	480.707	960.407	1.04599	149.214	17850	17850	MS2	7/66	170307_chiba_PAF15_02.raw
	High	LMDLDVEQLGIPEQEYSCVIK	Unambiguous	4	2	NP_001081011.1;NP_001082364.1		CID	1	0	1	1	40.1	0.00143165	0	28.9797	1	2	1211.6	2422.19	-0.446697	110.204	12740	12740	MS2	12/214	170307_chiba_PAF15_02.raw
	High	YLNFFTK	Unambiguous	4	2	NP_001081011.1;NP_001082364.1		CID	1	0	1	1	40.09	0.00165044	0	4.67431	3	2	466.747	932.487	-0.647933	143.942	17213	17213	MS2	6/56	170307_chiba_PAF15_02.raw
	High	YLNFFTK	Unambiguous	4	2	NP_001081011.1;NP_001082364.1		CID	1	0	1	1	40.07	0.00150554	0	0	3	2	466.747	932.487	-0.386117	134.769	16004	16004	MS2	6/56	170307_chiba_PAF15_02.raw
	High	LMDLDVEQLGIPEQEYSCVIK	Unambiguous	4	2	NP_001081011.1;NP_001082364.1		CID	1	0	1	1	40	0.001285	0	36.6773	2	2	1211.6	2422.18	-1.55543	118.911	13899	13899	MS2	8/214	170307_chiba_PAF15_02.raw
	High	MPSGEFAR	Unambiguous	4	2	NP_001081011.1;NP_001082364.1		CID	1	0	1	1	39.95	0.000536137	0	8.34456	29	2	447.711	894.414	0.0622679	150.157	17949	17949	MS2	7/60	170307_chiba_PAF15_02.raw
	High	YLNFFTK	Unambiguous	4	2	NP_001081011.1;NP_001082364.1		CID	1	0	1	1	39.93	0.00171238	0	12.0288	1	2	466.747	932.487	-1.04066	80.2824	8654	8654	MS2	6/56	170307_chiba_PAF15_02.raw
	High	YLNFFTK	Unambiguous	4	2	NP_001081011.1;NP_001082364.1		CID	1	0	1	1	39.88	0.00154716	0	18.0448	2	2	466.748	932.488	0.137516	112.038	12984	12984	MS2	6/56	170307_chiba_PAF15_02.raw
	High	MPSGEFAR	Unambiguous	4	2	NP_001081011.1;NP_001082364.1		CID	1	0	1	1	39.86	0.000557691	0	8.60534	3	2	447.71	894.413	-1.16606	124.351	14621	14621	MS2	7/60	170307_chiba_PAF15_02.raw
	High	MPSGEFAR	Unambiguous	4	2	NP_001081011.1;NP_001082364.1		CID	1	0	1	1	39.85	0.000486517	0	5.60037	28	2	447.71	894.413	-0.415415	150.966	18037	18037	MS2	6/60	170307_chiba_PAF15_02.raw
	High	YLNFFTK	Unambiguous	4	2	NP_001081011.1;NP_001082364.1		CID	1	0	1	1	39.8	0.00176441	0	29.4564	2	2	466.747	932.487	-0.90975	125.883	14824	14824	MS2	6/56	170307_chiba_PAF15_02.raw
	High	LSQTSNVDKEEEAVTIEMNEPVQLTFALR	Unambiguous	4	2	NP_001081011.1;NP_001082364.1		CID	1	0	1	1	39.79	0.000839634	1	1.66143	0	3	1097.88	3291.64	-0.858632	91.4934	10216	10216	MS2	12/322	170307_chiba_PAF15_02.raw
	High	LMDLDVEQLGIPEQEYSCVIK	Unambiguous	4	2	NP_001081011.1;NP_001082364.1		CID	1	0	1	1	39.78	0.00132021	0	60.5286	3	2	1211.6	2422.19	0.460444	118.129	13795	13795	MS2	7/214	170307_chiba_PAF15_02.raw
	High	YLNFFTK	Unambiguous	4	2	NP_001081011.1;NP_001082364.1		CID	1	0	1	1	39.75	0.00178484	0	22.0662	3	2	466.747	932.487	-1.10611	136.814	16273	16273	MS2	6/56	170307_chiba_PAF15_02.raw
	High	YLNFFTK	Unambiguous	4	2	NP_001081011.1;NP_001082364.1		CID	1	0	1	1	39.75	0.00162066	0	11.2408	0	2	466.747	932.488	0.00660816	70.5849	7278	7278	MS2	6/56	170307_chiba_PAF15_02.raw
	High	YLNFFTK	Unambiguous	4	2	NP_001081011.1;NP_001082364.1		CID	1	0	1	1	39.69	0.00180967	0	0	2	2	466.747	932.487	-0.975205	105.394	12098	12098	MS2	6/56	170307_chiba_PAF15_02.raw
	High	LMDLDVEQLGIPEQEYSCVIK	Unambiguous	4	2	NP_001081011.1;NP_001082364.1		CID	1	0	1	1	39.66	0.00157889	0	24.3831	2	2	1211.6	2422.19	-0.24511	134.606	15983	15983	MS2	10/214	170307_chiba_PAF15_02.raw
	High	DLSQIGDAVVISCAK	Unambiguous	4	2	NP_001081011.1;NP_001082364.1		CID	1	0	1	1	39.56	0.00202512	0	46.6007	2	2	759.896	1518.78	0.529315	117.164	13667	13667	MS2	11/156	170307_chiba_PAF15_02.raw
	High	MPSGEFAR	Unambiguous	4	2	NP_001081011.1;NP_001082364.1		CID	1	0	1	1	39.54	0.000522514	0	6.28036	2	2	447.71	894.413	-0.551896	122.27	14345	14345	MS2	7/60	170307_chiba_PAF15_02.raw
	High	DLSQIGDAVVISCAK	Unambiguous	4	2	NP_001081011.1;NP_001082364.1		CID	1	0	1	1	39.45	0.00183304	0	20.1364	12	3	506.933	1518.78	1.0228	146.102	17486	17486	MS2	10/156	170307_chiba_PAF15_02.raw
	High	ATPLSPTVILSMSADIPLVVEYK	Unambiguous	3	2	NP_001081011.1;NP_001082364.1		CID	1	0	1	1	39.38	0.00086509	0	2.76153	0	3	815.45	2444.34	0.0238437	135.313	16075	16075	MS2	17/214	170307_chiba_PAF15_02.raw
	High	LMDLDVEQLGIPEQEYSCVIK	Unambiguous	4	2	NP_001081011.1;NP_001082364.1		CID	1	0	1	1	39.36	0.00168023	0	18.9474	0	3	808.067	2422.19	-0.603438	100.206	11396	11396	MS2	15/214	170307_chiba_PAF15_02.raw
	High	LVQGSILK	Unambiguous	4	2	NP_001081011.1;NP_001082364.1		CID	1	0	1	1	39.34	0.00221184	0	43.48	3	2	429.276	857.545	-0.145275	139.705	16653	16653	MS2	6/66	170307_chiba_PAF15_02.raw
	High	MPSGEFAR	Unambiguous	4	2	NP_001081011.1;NP_001082364.1		CID	1	0	1	1	39.33	0.000618409	0	38.4099	5	2	447.711	894.414	0.130508	132.737	15735	15735	MS2	7/60	170307_chiba_PAF15_02.raw
	High	LMDLDVEQLGIPEQEYSCVIK	Unambiguous	4	2	NP_001081011.1;NP_001082364.1		CID	1	0	1	1	39.3	0.00160374	0	5.30172	6	3	808.068	2422.19	0.908463	149.47	17877	17877	MS2	18/214	170307_chiba_PAF15_02.raw
	High	LMDLDVEQLGIPEQEYSCVIK	Unambiguous	4	2	NP_001081011.1;NP_001082364.1		CID	1	0	1	1	39.28	0.00170556	0	13.3779	0	3	808.067	2422.19	-0.527843	98.5067	11166	11166	MS2	13/214	170307_chiba_PAF15_02.raw
	High	LSQTSNVDKEEEAVTIEMNEPVQLTFALR	Unambiguous	4	2	NP_001081011.1;NP_001082364.1		CID	1	0	1	1	39.28	0.000832126	1	49.2006	2	2	1646.33	3291.65	1.53743	106.183	12204	12204	MS2	21/322	170307_chiba_PAF15_02.raw
	High	MPSGEFAR	Unambiguous	4	2	NP_001081011.1;NP_001082364.1		CID	1	0	1	1	39.26	0.000628457	0	18.9018	3	2	447.711	894.414	0.198749	127.809	15083	15083	MS2	7/60	170307_chiba_PAF15_02.raw
	High	YLNFFTK	Unambiguous	4	2	NP_001081011.1;NP_001082364.1		CID	1	0	1	1	39.26	0.00178458	0	22.0611	2	2	466.748	932.488	0.137516	123.569	14517	14517	MS2	6/56	170307_chiba_PAF15_02.raw
	High	LMDLDVEQLGIPEQEYSCVIK	Unambiguous	4	2	NP_001081011.1;NP_001082364.1		CID	1	0	1	1	39.26	0.00167193	0	23.5323	1	2	1211.6	2422.19	0.258858	110.745	12813	12813	MS2	17/214	170307_chiba_PAF15_02.raw
	High	YLNFFTK	Unambiguous	4	2	NP_001081011.1;NP_001082364.1		CID	1	0	1	1	39.25	0.00200263	0	17.7771	1	2	466.747	932.486	-1.30248	81.6368	8843	8843	MS2	6/56	170307_chiba_PAF15_02.raw
	High	MPSGEFAR	Unambiguous	4	2	NP_001081011.1;NP_001082364.1		CID	1	0	1	1	39.17	0.000611352	0	15.8738	2	2	447.71	894.413	-0.824858	127.301	15014	15014	MS2	7/60	170307_chiba_PAF15_02.raw
	High	MPSGEFAR	Unambiguous	4	2	NP_001081011.1;NP_001082364.1		CID	1	0	1	1	39.07	0.000582234	0	11.0763	3	2	447.71	894.414	-0.347175	141.313	16865	16865	MS2	7/60	170307_chiba_PAF15_02.raw
	High	YLNFFTK	Unambiguous	4	2	NP_001081011.1;NP_001082364.1		CID	1	0	1	1	38.99	0.0019306	0	9.75676	0	2	466.747	932.487	-0.386117	62.5635	6125	6125	MS2	6/56	170307_chiba_PAF15_02.raw
	High	MPSGEFAR	Unambiguous	4	2	NP_001081011.1;NP_001082364.1		CID	1	0	1	1	38.84	0.000705332	0	21.637	3	2	447.71	894.413	-1.43902	130.789	15476	15476	MS2	7/60	170307_chiba_PAF15_02.raw
	High	LMDLDVEQLGIPEQEYSCVIK	Unambiguous	4	2	NP_001081011.1;NP_001082364.1		CID	1	0	1	1	38.79	0.00178375	0	4.03846	7	3	808.068	2422.19	1.05965	150.278	17962	17962	MS2	18/214	170307_chiba_PAF15_02.raw
	High	SDGFDTYR	Unambiguous	4	2	NP_001081011.1;NP_001082364.1		CID	1	0	1	1	38.78	0.00013212	0	50.0771	5	2	480.707	960.406	0.410481	140.862	16806	16806	MS2	7/66	170307_chiba_PAF15_02.raw
	High	MPSGEFAR	Unambiguous	4	2	NP_001081011.1;NP_001082364.1		CID	1	0	1	1	38.76	0.000725098	0	8.10118	21	2	447.71	894.414	-0.210694	147.719	17684	17684	MS2	6/60	170307_chiba_PAF15_02.raw
	High	SDGFDTYR	Unambiguous	4	2	NP_001081011.1;NP_001082364.1		CID	1	0	1	1	38.72	0.000214842	0	41.5377	1	2	480.706	960.405	-0.606342	47.1111	3788	3788	MS2	7/66	170307_chiba_PAF15_02.raw
	High	YLNFFTK	Unambiguous	4	2	NP_001081011.1;NP_001082364.1		CID	1	0	1	1	38.68	0.00203956	0	7.5151	2	2	466.748	932.488	0.137516	109.362	12627	12627	MS2	6/56	170307_chiba_PAF15_02.raw
	High	YLNFFTK	Unambiguous	4	2	NP_001081011.1;NP_001082364.1		CID	1	0	1	1	38.65	0.00229932	0	1.2978	0	2	466.747	932.486	-1.23702	75.3805	7948	7948	MS2	6/56	170307_chiba_PAF15_02.raw
	High	LMDLDVEQLGIPEQEYSCVIK	Unambiguous	4	2	NP_001081011.1;NP_001082364.1		CID	1	0	1	1	38.62	0.00201297	0	29.4735	1	2	1211.6	2422.19	-0.345903	104.449	11970	11970	MS2	15/214	170307_chiba_PAF15_02.raw
	High	LMDLDVEQLGIPEQEYSCVIK	Unambiguous	4	2	NP_001081011.1;NP_001082364.1		CID	1	0	1	1	38.57	0.00170269	0	35.9353	2	2	1211.6	2422.19	2.37551	117.947	13771	13771	MS2	13/214	170307_chiba_PAF15_02.raw
	High	YLNFFTK	Unambiguous	4	2	NP_001081011.1;NP_001082364.1		CID	1	0	1	1	38.51	0.00237465	0	11.4379	2	2	466.747	932.487	-0.90975	121.33	14220	14220	MS2	6/56	170307_chiba_PAF15_02.raw
	High	ATPLSPTVILSmSADIPLVVEYK	Unambiguous	3	2	NP_001081011.1;NP_001082364.1	M12(Oxidation)	CID	1	0	1	1	38.48	0.00115653	0	34.2797	1	3	820.781	2460.33	-0.911249	102.009	11640	11640	MS2	17/214	170307_chiba_PAF15_02.raw
	High	MPSGEFAR	Unambiguous	4	2	NP_001081011.1;NP_001082364.1		CID	1	0	1	1	38.44	0.000773381	0	13.4256	3	2	447.71	894.413	-0.961339	127.604	15055	15055	MS2	7/60	170307_chiba_PAF15_02.raw
	High	YLNFFTK	Unambiguous	4	2	NP_001081011.1;NP_001082364.1		CID	1	0	1	1	38.43	0.0024188	0	7.25297	3	2	466.747	932.487	-0.844296	133.611	15852	15852	MS2	6/56	170307_chiba_PAF15_02.raw
	High	YLNFFTK	Unambiguous	4	2	NP_001081011.1;NP_001082364.1		CID	1	0	1	1	38.36	0.0024581	0	5.11316	0	2	466.747	932.486	-1.23702	74.6521	7843	7843	MS2	6/56	170307_chiba_PAF15_02.raw
	High	YLNFFTK	Unambiguous	4	2	NP_001081011.1;NP_001082364.1		CID	1	0	1	1	38.27	0.00224149	0	2.81273	15	2	466.748	932.488	0.333879	149.772	17906	17906	MS2	6/56	170307_chiba_PAF15_02.raw
	High	LVQGSILK	Unambiguous	4	2	NP_001081011.1;NP_001082364.1		CID	1	0	1	1	38.23	0.00285597	0	39.6811	3	2	429.277	857.546	0.424119	139.847	16672	16672	MS2	7/66	170307_chiba_PAF15_02.raw
	High	ATPLSPTVILSMSADIPLVVEYK	Unambiguous	3	2	NP_001081011.1;NP_001082364.1		CID	1	0	1	1	38.22	0.00111489	0	3.08041	0	3	815.45	2444.33	-0.425617	128.165	15130	15130	MS2	18/214	170307_chiba_PAF15_02.raw
	High	LSQTSNVDKEEEAVTIEMNEPVQLTFALR	Unambiguous	4	2	NP_001081011.1;NP_001082364.1		CID	1	0	1	1	38.14	0.00107423	1	6.69163	0	3	1097.89	3291.64	0.0314067	129.922	15361	15361	MS2	18/322	170307_chiba_PAF15_02.raw
	High	LMDLDVEQLGIPEQEYSCVIK	Unambiguous	4	2	NP_001081011.1;NP_001082364.1		CID	1	0	1	1	38.13	0.00204575	0	59.7947	3	2	1211.6	2422.19	1.87155	142.749	17054	17054	MS2	15/214	170307_chiba_PAF15_02.raw
	High	LMDLDVEQLGIPEQEYSCVIK	Unambiguous	4	2	NP_001081011.1;NP_001082364.1		CID	1	0	1	1	38.06	0.0022822	0	18.2524	1	2	1211.6	2422.19	-0.24511	111.523	12916	12916	MS2	7/214	170307_chiba_PAF15_02.raw
	High	LMDLDVEQLGIPEQEYSCVIK	Unambiguous	4	2	NP_001081011.1;NP_001082364.1		CID	1	0	1	1	37.98	0.00210968	0	27.3652	1	3	808.069	2422.19	1.28644	140.777	16795	16795	MS2	14/214	170307_chiba_PAF15_02.raw
	High	ATPLSPTVILSMSADIPLVVEYK	Unambiguous	3	2	NP_001081011.1;NP_001082364.1		CID	1	0	1	1	37.98	0.00119416	0	2.40179	0	3	815.45	2444.34	0.0238437	133.71	15865	15865	MS2	7/214	170307_chiba_PAF15_02.raw
	High	MPSGEFAR	Unambiguous	4	2	NP_001081011.1;NP_001082364.1		CID	1	0	1	1	37.96	0.000847766	0	11.9966	16	2	447.711	894.414	0.266989	151.647	18117	18117	MS2	7/60	170307_chiba_PAF15_02.raw
	High	YLNFFTK	Unambiguous	4	2	NP_001081011.1;NP_001082364.1		CID	1	0	1	1	37.95	0.00420852	0	12.9203	1	2	466.747	932.486	-1.82611	79.2493	8507	8507	MS2	5/56	170307_chiba_PAF15_02.raw
	High	LMDLDVEQLGIPEQEYSCVIK	Unambiguous	4	2	NP_001081011.1;NP_001082364.1		CID	1	0	1	1	37.95	0.00235677	0	52.6151	3	2	1211.6	2422.19	0.158064	138.732	16526	16526	MS2	14/214	170307_chiba_PAF15_02.raw
	High	MPSGEFAR	Unambiguous	4	2	NP_001081011.1;NP_001082364.1		CID	1	0	1	1	37.94	0.000755262	0	26.6798	4	2	447.71	894.414	-0.347175	131.299	15544	15544	MS2	7/60	170307_chiba_PAF15_02.raw
	High	MPSGEFAR	Unambiguous	4	2	NP_001081011.1;NP_001082364.1		CID	1	0	1	1	37.91	0.000857582	0	20.6586	4	2	447.711	894.414	-0.0742129	140.232	16723	16723	MS2	7/60	170307_chiba_PAF15_02.raw
	High	LVQGSILK	Unambiguous	4	2	NP_001081011.1;NP_001082364.1		CID	1	0	1	1	37.88	0.00325045	0	40.1909	0	2	429.276	857.545	-0.643495	52.479	4614	4614	MS2	6/66	170307_chiba_PAF15_02.raw
	High	MPSGEFAR	Unambiguous	4	2	NP_001081011.1;NP_001082364.1		CID	1	0	1	1	37.64	0.000809278	0	0	3	2	447.71	894.414	-0.347175	132.986	15768	15768	MS2	7/60	170307_chiba_PAF15_02.raw
	High	LSQTSNVDKEEEAVTIEMNEPVQLTFALR	Unambiguous	4	2	NP_001081011.1;NP_001082364.1		CID	1	0	1	1	37.57	0.00129489	1	22.7735	1	2	1646.32	3291.64	-0.539325	94.4693	10621	10621	MS2	22/322	170307_chiba_PAF15_02.raw
	High	MPSGEFAR	Unambiguous	4	2	NP_001081011.1;NP_001082364.1		CID	1	0	1	1	37.51	0.000958062	0	19.4974	4	2	447.71	894.413	-1.2343	136.087	16177	16177	MS2	7/60	170307_chiba_PAF15_02.raw
	High	LVQGSILK	Unambiguous	4	2	NP_001081011.1;NP_001082364.1		CID	1	0	1	1	37.48	0.00356404	0	36.7504	3	2	429.276	857.545	-0.71467	140.238	16724	16724	MS2	7/66	170307_chiba_PAF15_02.raw
	High	LMDLDVEQLGIPEQEYSCVIK	Unambiguous	4	2	NP_001081011.1;NP_001082364.1		CID	1	0	1	1	37.44	0.00246112	0	32.5366	21	2	1211.6	2422.19	0.863617	147.006	17597	17597	MS2	17/214	170307_chiba_PAF15_02.raw
	High	YLNFFTK	Unambiguous	4	2	NP_001081011.1;NP_001082364.1		CID	1	0	1	1	37.39	0.00307326	0	11.3893	2	2	466.747	932.486	-1.23702	104.042	11915	11915	MS2	6/56	170307_chiba_PAF15_02.raw
	High	LSQTSNVDKEEEAVTIEMNEPVQLTFALR	Unambiguous	4	2	NP_001081011.1;NP_001082364.1		CID	1	0	1	1	37.35	0.00146341	1	4.63373	0	3	1097.89	3291.64	-0.191103	93.8167	10533	10533	MS2	10/322	170307_chiba_PAF15_02.raw
	High	ATPLSPTVILSMSADIPLVVEYK	Unambiguous	3	2	NP_001081011.1;NP_001082364.1		CID	1	0	1	1	37.31	0.00145838	0	1.84611	0	3	815.449	2444.33	-0.875078	130.555	15445	15445	MS2	13/214	170307_chiba_PAF15_02.raw
	High	LSQTSNVDKEEEAVTIEMNEPVQLTFALR	Unambiguous	4	2	NP_001081011.1;NP_001082364.1		CID	1	0	1	1	37.29	0.00130647	1	58.9029	3	2	1646.32	3291.64	0.202374	107.584	12391	12391	MS2	24/322	170307_chiba_PAF15_02.raw
	High	LSQTSNVDKEEEAVTIEMNEPVQLTFALR	Unambiguous	4	2	NP_001081011.1;NP_001082364.1		CID	1	0	1	1	37.28	0.00130948	1	4.23937	0	3	1097.89	3291.64	0.253916	108.603	12526	12526	MS2	11/322	170307_chiba_PAF15_02.raw
	High	YLNFFTK	Unambiguous	4	2	NP_001081011.1;NP_001082364.1		CID	1	0	1	1	37.26	0.00287535	0	7.78579	13	2	466.747	932.488	0.00660816	148.13	17733	17733	MS2	6/56	170307_chiba_PAF15_02.raw
	High	LSQTSNVDKEEEAVTIEMNEPVQLTFALR	Unambiguous	4	2	NP_001081011.1;NP_001082364.1		CID	1	0	1	1	37.23	0.00132464	1	59.8622	2	2	1646.32	3291.64	0.128204	109.191	12605	12605	MS2	20/322	170307_chiba_PAF15_02.raw
	High	LVQGSILK	Unambiguous	4	2	NP_001081011.1;NP_001082364.1		CID	1	0	1	1	37.15	0.00384541	0	17.469	1	2	429.276	857.545	-0.999367	102.936	11765	11765	MS2	7/66	170307_chiba_PAF15_02.raw
	High	ATPLSPTVILSMSADIPLVVEYK	Unambiguous	3	2	NP_001081011.1;NP_001082364.1		CID	1	0	1	1	37.14	0.00148762	0	2.31065	0	3	815.451	2444.34	1.07258	144.041	17226	17226	MS2	14/214	170307_chiba_PAF15_02.raw
	High	MPSGEFAR	Unambiguous	4	2	NP_001081011.1;NP_001082364.1		CID	1	0	1	1	37.09	0.00161233	0	0	4	2	447.71	894.412	-1.78023	128.14	15127	15127	MS2	6/60	170307_chiba_PAF15_02.raw
	High	MPSGEFAR	Unambiguous	4	2	NP_001081011.1;NP_001082364.1		CID	1	0	1	1	37.07	0.00106021	0	10.6891	4	2	447.71	894.413	-1.16606	133.692	15863	15863	MS2	7/60	170307_chiba_PAF15_02.raw
	High	MPSGEFAR	Unambiguous	4	2	NP_001081011.1;NP_001082364.1		CID	1	0	1	1	37.06	0.000924907	0	7.77335	17	2	447.71	894.413	-0.415415	152.829	18251	18251	MS2	7/60	170307_chiba_PAF15_02.raw
	High	MPSGEFAR	Unambiguous	4	2	NP_001081011.1;NP_001082364.1		CID	1	0	1	1	37.05	0.00106511	0	0	3	2	447.71	894.413	-0.961339	133.364	15819	15819	MS2	7/60	170307_chiba_PAF15_02.raw
	High	MPSGEFAR	Unambiguous	4	2	NP_001081011.1;NP_001082364.1		CID	1	0	1	1	37.01	0.00107496	0	18.3823	4	2	447.71	894.413	-1.2343	135.76	16134	16134	MS2	7/60	170307_chiba_PAF15_02.raw
	High	MPSGEFAR	Unambiguous	4	2	NP_001081011.1;NP_001082364.1		CID	1	0	1	1	37	0.00105749	0	17.6773	4	2	447.711	894.414	0.266989	140.529	16762	16762	MS2	6/60	170307_chiba_PAF15_02.raw
	High	YLNFFTK	Unambiguous	4	2	NP_001081011.1;NP_001082364.1		CID	1	0	1	1	37	0.00336202	0	19.3558	3	2	466.747	932.487	-0.90975	138.605	16509	16509	MS2	6/56	170307_chiba_PAF15_02.raw
	High	DLSQIGDAVVISCAK	Unambiguous	4	2	NP_001081011.1;NP_001082364.1		CID	1	0	1	1	36.99	0.00308979	0	47.0758	2	2	759.895	1518.78	-0.0333005	115.796	13485	13485	MS2	18/156	170307_chiba_PAF15_02.raw
	High	MPSGEFAR	Unambiguous	4	2	NP_001081011.1;NP_001082364.1		CID	1	0	1	1	36.96	0.00108741	0	18.8515	3	2	447.71	894.413	-1.16606	123.737	14540	14540	MS2	7/60	170307_chiba_PAF15_02.raw
	High	YLNFFTK	Unambiguous	4	2	NP_001081011.1;NP_001082364.1		CID	1	0	1	1	36.88	0.00531251	0	12.2383	4	2	466.748	932.488	0.399333	144.306	17261	17261	MS2	6/56	170307_chiba_PAF15_02.raw
	High	LMDLDVEQLGIPEQEYSCVIK	Unambiguous	4	2	NP_001081011.1;NP_001082364.1		CID	1	0	1	1	36.85	0.00281924	0	18.3696	1	3	808.068	2422.19	0.832868	143.197	17113	17113	MS2	14/214	170307_chiba_PAF15_02.raw
	High	LMDLDVEQLGIPEQEYSCVIK	Unambiguous	4	2	NP_001081011.1;NP_001082364.1		CID	1	0	1	1	36.83	0.00280113	0	34.9436	1	3	808.067	2422.19	-1.1326	109.161	12601	12601	MS2	16/214	170307_chiba_PAF15_02.raw
	High	YLNFFTK	Unambiguous	4	2	NP_001081011.1;NP_001082364.1		CID	1	0	1	1	36.81	0.00318927	0	12.2251	1	2	466.747	932.487	-0.517025	85.1801	9345	9345	MS2	6/56	170307_chiba_PAF15_02.raw
	High	LVQGSILK	Unambiguous	4	2	NP_001081011.1;NP_001082364.1		CID	1	0	1	1	36.8	0.00416815	0	21.126	0	2	429.276	857.545	-0.643495	48.2773	3963	3963	MS2	6/66	170307_chiba_PAF15_02.raw
	High	MPSGEFAR	Unambiguous	4	2	NP_001081011.1;NP_001082364.1		CID	1	0	1	1	36.77	0.00113604	0	0	3	2	447.71	894.413	-1.09782	135.25	16067	16067	MS2	6/60	170307_chiba_PAF15_02.raw
	High	LVQGSILK	Unambiguous	4	2	NP_001081011.1;NP_001082364.1		CID	1	0	1	1	36.69	0.00427507	0	56.2971	3	2	429.276	857.544	-1.21289	131.138	15522	15522	MS2	7/66	170307_chiba_PAF15_02.raw
	High	YLNFFTK	Unambiguous	4	2	NP_001081011.1;NP_001082364.1		CID	1	0	1	1	36.69	0.00361077	0	0	3	2	466.747	932.487	-0.90975	111.103	12860	12860	MS2	6/56	170307_chiba_PAF15_02.raw
	High	YLNFFTK	Unambiguous	4	2	NP_001081011.1;NP_001082364.1		CID	1	0	1	1	36.61	0.00333958	0	0	3	2	466.747	932.488	-0.058846	134.318	15945	15945	MS2	6/56	170307_chiba_PAF15_02.raw
	High	YLNFFTK	Unambiguous	4	2	NP_001081011.1;NP_001082364.1		CID	1	0	1	1	36.37	0.00352932	0	29.2949	2	2	466.747	932.487	-0.189754	124.148	14594	14594	MS2	6/56	170307_chiba_PAF15_02.raw
	High	LSQTSNVDKEEEAVTIEMNEPVQLTFALR	Unambiguous	4	2	NP_001081011.1;NP_001082364.1		CID	1	0	1	1	36.36	0.0020693	1	52.8659	1	2	1646.33	3291.65	2.72414	92.3194	10330	10330	MS2	23/322	170307_chiba_PAF15_02.raw
	High	LMDLDVEQLGIPEQEYSCVIK	Unambiguous	4	2	NP_001081011.1;NP_001082364.1		CID	1	0	1	1	36.23	0.00313275	0	16.9113	2	3	808.069	2422.19	2.04239	139.19	16586	16586	MS2	9/214	170307_chiba_PAF15_02.raw
	High	LVQGSILK	Unambiguous	4	2	NP_001081011.1;NP_001082364.1		CID	1	0	1	1	36.19	0.0047967	0	9.02323	3	2	429.276	857.545	-0.999367	133.971	15899	15899	MS2	7/66	170307_chiba_PAF15_02.raw
	High	LVQGSILK	Unambiguous	4	2	NP_001081011.1;NP_001082364.1		CID	1	0	1	1	36.15	0.00484109	0	14.8728	3	2	429.276	857.545	-1.14172	134.094	15915	15915	MS2	7/66	170307_chiba_PAF15_02.raw
	High	LMDLDVEQLGIPEQEYSCVIK	Unambiguous	4	2	NP_001081011.1;NP_001082364.1		CID	1	0	1	1	36.12	0.00359184	0	46.5438	1	3	808.068	2422.19	0.152513	112.177	13003	13003	MS2	17/214	170307_chiba_PAF15_02.raw
	High	LSQTSNVDKEEEAVTIEMNEPVQLTFALR	Unambiguous	4	2	NP_001081011.1;NP_001082364.1		CID	1	0	1	1	35.96	0.00201543	1	5.67143	0	3	1097.89	3291.64	-0.302358	126.138	14858	14858	MS2	10/322	170307_chiba_PAF15_02.raw
	High	MPSGEFAR	Unambiguous	4	2	NP_001081011.1;NP_001082364.1		CID	1	0	1	1	35.93	0.00119977	0	9.16741	3	2	447.71	894.413	-0.551896	129.228	15271	15271	MS2	7/60	170307_chiba_PAF15_02.raw
	High	LMDLDVEQLGIPEQEYSCVIK	Unambiguous	4	2	NP_001081011.1;NP_001082364.1		CID	1	0	1	1	35.86	0.00348917	0	25.3882	2	2	1211.6	2422.19	1.166	119.233	13942	13942	MS2	13/214	170307_chiba_PAF15_02.raw
	High	LSQTSNVDKEEEAVTIEMNEPVQLTFALR	Unambiguous	4	2	NP_001081011.1;NP_001082364.1		CID	1	0	1	1	35.79	0.00205634	1	7.13234	0	3	1097.88	3291.64	-0.413613	136.431	16222	16222	MS2	11/322	170307_chiba_PAF15_02.raw
	High	YLNFFTK	Unambiguous	4	2	NP_001081011.1;NP_001082364.1		CID	1	0	1	1	35.76	0.00406155	0	22.3153	0	2	466.747	932.488	-0.058846	71.3583	7385	7385	MS2	6/56	170307_chiba_PAF15_02.raw
	High	YLNFFTK	Unambiguous	4	2	NP_001081011.1;NP_001082364.1		CID	1	0	1	1	35.57	0.00467304	0	8.26638	3	2	466.747	932.486	-1.23702	121.685	14267	14267	MS2	6/56	170307_chiba_PAF15_02.raw
	High	MPSGEFAR	Unambiguous	4	2	NP_001081011.1;NP_001082364.1		CID	1	0	1	1	35.53	0.00366667	0	21.3732	28	2	447.711	894.415	0.881152	148.544	17781	17781	MS2	7/60	170307_chiba_PAF15_02.raw
	High	YLNFFTK	Unambiguous	4	2	NP_001081011.1;NP_001082364.1		CID	1	0	1	1	35.52	0.00736426	0	3.91347	0	2	466.747	932.486	-1.56429	73.8973	7738	7738	MS2	6/56	170307_chiba_PAF15_02.raw
	High	LVQGSILK	Unambiguous	4	2	NP_001081011.1;NP_001082364.1		CID	1	0	1	1	35.48	0.00564863	0	14.4241	9	2	429.276	857.544	-1.42641	145.53	17417	17417	MS2	6/66	170307_chiba_PAF15_02.raw
	High	YLNFFTK	Unambiguous	4	2	NP_001081011.1;NP_001082364.1		CID	1	0	1	1	35.46	0.00435203	0	3.91782	12	2	466.747	932.488	-0.1243	148.933	17819	17819	MS2	6/56	170307_chiba_PAF15_02.raw
	High	LVQGSILK	Unambiguous	4	2	NP_001081011.1;NP_001082364.1		CID	0.2286	0	1	1	35.44	0.00570089	0	29.236	0	2	429.276	857.544	-1.35524	51.0379	4391	4391	MS2	7/66	170307_chiba_PAF15_02.raw
	High	YLNFFTK	Unambiguous	4	2	NP_001081011.1;NP_001082364.1		CID	1	0	1	1	35.41	0.00484842	0	33.9613	0	2	466.747	932.486	-1.30248	72.5502	7550	7550	MS2	6/56	170307_chiba_PAF15_02.raw
	High	LVQGSILK	Unambiguous	4	2	NP_001081011.1;NP_001082364.1		CID	1	0	1	1	35.28	0.0057666	0	50.5985	4	2	429.276	857.544	-1.56876	133.538	15842	15842	MS2	6/66	170307_chiba_PAF15_02.raw
	High	YLNFFTK	Unambiguous	4	2	NP_001081011.1;NP_001082364.1		CID	1	0	1	1	35.27	0.00454665	0	47.1929	0	2	466.747	932.487	-0.582479	77.4709	8253	8253	MS2	6/56	170307_chiba_PAF15_02.raw
	High	YLNFFTK	Unambiguous	4	2	NP_001081011.1;NP_001082364.1		CID	1	0	1	1	35.23	0.00697305	0	28.1909	0	2	466.747	932.486	-1.36793	75.8464	8015	8015	MS2	6/56	170307_chiba_PAF15_02.raw
	High	YLNFFTK	Unambiguous	4	2	NP_001081011.1;NP_001082364.1		CID	1	0	1	1	35.23	0.00505359	0	16.2173	2	2	466.747	932.487	-0.778842	120.341	14089	14089	MS2	6/56	170307_chiba_PAF15_02.raw
	High	LMDLDVEQLGIPEQEYSCVIK	Unambiguous	4	2	NP_001081011.1;NP_001082364.1		CID	1	0	1	1	35.08	0.00391175	0	6.33042	1	3	808.068	2422.19	0.530488	139.981	16690	16690	MS2	8/214	170307_chiba_PAF15_02.raw
	High	LMDLDVEQLGIPEQEYSCVIK	Unambiguous	4	2	NP_001081011.1;NP_001082364.1		CID	1	0	1	1	35.01	0.00443278	0	37.1091	2	2	1211.6	2422.19	0.359651	143.473	17150	17150	MS2	12/214	170307_chiba_PAF15_02.raw
	High	DLIDEACWDITSSGISLQSMDSSHVSLVQLTLR	Unambiguous	4	2	NP_001081011.1;NP_001082364.1		CID	1	0	1	1	34.99	0.00334389	0	3.98169	0	3	1207.26	3619.76	-0.254101	133.879	15887	15887	MS2	22/346	170307_chiba_PAF15_02.raw
	High	YLNFFTK	Unambiguous	4	2	NP_001081011.1;NP_001082364.1		CID	1	0	1	1	34.92	0.00492824	0	6.04307	2	2	466.747	932.487	-0.189754	132.36	15685	15685	MS2	6/56	170307_chiba_PAF15_02.raw
	High	LVQGSILK	Unambiguous	4	2	NP_001081011.1;NP_001082364.1		CID	1	0	1	1	34.9	0.00614828	0	14.4749	22	2	429.277	857.546	0.424119	151.099	18055	18055	MS2	6/66	170307_chiba_PAF15_02.raw
	High	YLNFFTK	Unambiguous	4	2	NP_001081011.1;NP_001082364.1		CID	1	0	1	1	34.75	0.00564417	0	20.835	2	2	466.747	932.487	-0.844296	126.034	14844	14844	MS2	6/56	170307_chiba_PAF15_02.raw
	High	LMDLDVEQLGIPEQEYSCVIK	Unambiguous	4	2	NP_001081011.1;NP_001082364.1		CID	1	0	1	1	34.62	0.00507361	0	52.1434	2	2	1211.6	2422.19	0.158064	128.675	15198	15198	MS2	8/214	170307_chiba_PAF15_02.raw
	High	YLNFFTK	Unambiguous	4	2	NP_001081011.1;NP_001082364.1		CID	1	0	1	1	34.61	0.00529287	0	10.0533	2	2	466.747	932.487	-0.582479	120.977	14173	14173	MS2	6/56	170307_chiba_PAF15_02.raw
	High	LMDLDVEQLGIPEQEYSCVIK	Unambiguous	4	2	NP_001081011.1;NP_001082364.1		CID	1	0	1	1	34.57	0.00441662	0	34.4244	2	2	1211.6	2422.19	0.561238	141.24	16855	16855	MS2	13/214	170307_chiba_PAF15_02.raw
	High	LMDLDVEQLGIPEQEYSCVIK	Unambiguous	4	2	NP_001081011.1;NP_001082364.1		CID	1	0	1	1	34.51	0.00507986	0	9.30998	0	2	1211.6	2422.19	-0.0435226	96.1609	10847	10847	MS2	23/214	170307_chiba_PAF15_02.raw
	High	LMDLDVEQLGIPEQEYSCVIK	Unambiguous	4	2	NP_001081011.1;NP_001082364.1		CID	1	0	1	1	34.48	0.00500814	0	53.1622	1	2	1211.6	2422.19	0.359651	141.734	16921	16921	MS2	19/214	170307_chiba_PAF15_02.raw
	High	MPSGEFAR	Unambiguous	4	2	NP_001081011.1;NP_001082364.1		CID	1	0	1	1	34.42	0.00195161	0	25.0415	5	2	447.71	894.413	-1.09782	138.951	16555	16555	MS2	7/60	170307_chiba_PAF15_02.raw
	High	LMDLDVEQLGIPEQEYSCVIK	Unambiguous	4	2	NP_001081011.1;NP_001082364.1		CID	1	0	1	1	34.28	0.00535614	0	15.2594	0	3	808.068	2422.19	0.00132273	103.703	11869	11869	MS2	14/214	170307_chiba_PAF15_02.raw
	High	YLNFFTK	Unambiguous	4	2	NP_001081011.1;NP_001082364.1		CID	1	0	1	1	34.2	0.00997997	0	9.58498	2	2	466.747	932.486	-1.6952	106.314	12221	12221	MS2	6/56	170307_chiba_PAF15_02.raw
	High	AEDNADTVTMVFESPNQEK	Unambiguous	4	2	NP_001081011.1;NP_001082364.1		CID	1	0	1	1	34.13	0.00164206	0	39.2108	2	2	1062.97	2124.94	-0.620988	93.7475	10524	10524	MS2	10/206	170307_chiba_PAF15_02.raw
	High	ATPLSPTVILSMSADIPLVVEYK	Unambiguous	3	2	NP_001081011.1;NP_001082364.1		CID	1	0	1	1	34.12	0.00294316	0	4.27796	0	3	815.451	2444.34	1.67186	115.54	13450	13450	MS2	16/214	170307_chiba_PAF15_02.raw
	High	DLIDEACWDITSSGISLQSMDSSHVSLVQLTLR	Unambiguous	4	2	NP_001081011.1;NP_001082364.1		CID	1	0	1	1	33.94	0.00498502	0	23.8775	3	2	1810.39	3619.77	2.7004	134.652	15989	15989	MS2	10/346	170307_chiba_PAF15_02.raw
	High	MPSGEFAR	Unambiguous	4	2	NP_001081011.1;NP_001082364.1		CID	1	0	1	1	33.93	0.00208357	0	17.7051	29	2	447.71	894.414	-0.278934	147.471	17654	17654	MS2	7/60	170307_chiba_PAF15_02.raw
	High	MPSGEFAR	Unambiguous	4	2	NP_001081011.1;NP_001082364.1		CID	1	0	1	1	33.83	0.0022563	0	10.2595	4	2	447.711	894.414	-0.142453	143.508	17155	17155	MS2	7/60	170307_chiba_PAF15_02.raw
	High	MPSGEFAR	Unambiguous	4	2	NP_001081011.1;NP_001082364.1		CID	1	0	1	1	33.77	0.00228769	0	30.5019	3	2	447.71	894.414	-0.210694	138.282	16467	16467	MS2	7/60	170307_chiba_PAF15_02.raw
	High	LVQGSILK	Unambiguous	4	2	NP_001081011.1;NP_001082364.1		CID	1	0	1	1	33.69	0.00852988	0	40.2056	4	2	429.276	857.545	-0.572321	132.72	15732	15732	MS2	7/66	170307_chiba_PAF15_02.raw
	High	MPSGEFAR	Unambiguous	4	2	NP_001081011.1;NP_001082364.1		CID	1	0	1	1	33.65	0.0023302	0	20.4284	0	2	447.71	894.413	-0.961339	46.6503	3713	3713	MS2	7/60	170307_chiba_PAF15_02.raw
	High	LVQGSILK	Unambiguous	4	2	NP_001081011.1;NP_001082364.1		CID	1	0	1	1	33.64	0.00862865	0	39.0304	0	2	429.276	857.545	-0.999367	49.1031	4091	4091	MS2	7/66	170307_chiba_PAF15_02.raw
	High	LSQTSNVDKEEEAVTIEMNEPVQLTFALR	Unambiguous	4	2	NP_001081011.1;NP_001082364.1		CID	1	0	1	1	33.59	0.0034783	1	46.4041	0	2	1646.32	3291.64	-0.316815	98.9985	11233	11233	MS2	11/322	170307_chiba_PAF15_02.raw
	High	MPSGEFAR	Unambiguous	4	2	NP_001081011.1;NP_001082364.1		CID	1	0	1	1	33.47	0.0024513	0	19.0697	21	2	447.71	894.414	-0.210694	152.193	18180	18180	MS2	11/60	170307_chiba_PAF15_02.raw
	High	LMDLDVEQLGIPEQEYSCVIK	Unambiguous	4	2	NP_001081011.1;NP_001082364.1		CID	1	0	1	1	33.41	0.0061565	0	51.0708	3	2	1211.6	2422.19	1.0652	129.38	15291	15291	MS2	15/214	170307_chiba_PAF15_02.raw
	High	ATPLSPTVILSMSADIPLVVEYK	Unambiguous	3	2	NP_001081011.1;NP_001082364.1		CID	1	0	1	1	33.41	0.00337467	0	13.0705	0	3	815.45	2444.34	-0.275797	132.134	15655	15655	MS2	13/214	170307_chiba_PAF15_02.raw
	High	VLEALKDLIDEACWDITSSGISLQSMDSSHVSLVQLTLR	Unambiguous	4	2	NP_001081011.1;NP_001082364.1		CID	1	0	1	1	33.33	0.0023458	1	15.1107	26	3	1425.06	4273.18	1.29993	150.222	17956	17956	MS2	7/438	170307_chiba_PAF15_02.raw
	High	LSQTSNVDKEEEAVTIEMNEPVQLTFALR	Unambiguous	4	2	NP_001081011.1;NP_001082364.1		CID	1	0	1	1	33.29	0.00377395	1	4.11233	0	3	1097.89	3291.64	-0.0798481	98.4714	11161	11161	MS2	26/322	170307_chiba_PAF15_02.raw
	High	LVQGSILK	Unambiguous	4	2	NP_001081011.1;NP_001082364.1		CID	1	0	1	1	33.25	0.00943937	0	30.768	4	2	429.276	857.545	-0.21645	138.149	16449	16449	MS2	11/66	170307_chiba_PAF15_02.raw
	High	LVQGSILK	Unambiguous	4	2	NP_001081011.1;NP_001082364.1		CID	1	0	1	1	33.24	0.00922401	0	40.2647	0	2	429.276	857.544	-1.92464	46.6189	3708	3708	MS2	7/66	170307_chiba_PAF15_02.raw
	High	YLNFFTK	Unambiguous	4	2	NP_001081011.1;NP_001082364.1		CID	1	0	1	1	33.21	0.0125351	0	0	2	2	466.747	932.486	-1.62975	120.067	14053	14053	MS2	6/56	170307_chiba_PAF15_02.raw
	High	ATPLSPTVILSMSADIPLVVEYK	Unambiguous	3	2	NP_001081011.1;NP_001082364.1		CID	1	0	1	1	33.02	0.00391624	0	4.85699	0	3	815.45	2444.34	0.248574	126.605	14920	14920	MS2	15/214	170307_chiba_PAF15_02.raw
	High	LVQGSILK	Unambiguous	4	2	NP_001081011.1;NP_001082364.1		CID	1	0	1	1	33.01	0.00997569	0	11.0103	3	2	429.276	857.545	-0.928193	133.203	15797	15797	MS2	7/66	170307_chiba_PAF15_02.raw
	High	LVQGSILK	Unambiguous	4	2	NP_001081011.1;NP_001082364.1		CID	1	0	1	1	32.99	0.0100217	0	15.4931	2	2	429.276	857.544	-1.42641	103.972	11905	11905	MS2	5/66	170307_chiba_PAF15_02.raw
	High	ATPLSPTVILSMSADIPLVVEYK	Unambiguous	3	2	NP_001081011.1;NP_001082364.1		CID	1	0	1	1	32.93	0.00376905	0	11.2937	4	3	815.45	2444.34	-0.275797	153.043	18273	18273	MS2	7/214	170307_chiba_PAF15_02.raw
	High	YLNFFTK	Unambiguous	4	2	NP_001081011.1;NP_001082364.1		CID	1	0	1	1	32.84	0.00876193	0	0	1	2	466.747	932.487	-0.844296	84.5521	9257	9257	MS2	10/56	170307_chiba_PAF15_02.raw
	High	SDGFDTYR	Unambiguous	4	2	NP_001081011.1;NP_001082364.1		CID	1	0	1	1	32.79	0.000841628	0	40.1967	1	2	480.706	960.405	-0.733445	47.6166	3864	3864	MS2	5/66	170307_chiba_PAF15_02.raw
	High	LMDLDVEQLGIPEQEYSCVIK	Unambiguous	4	2	NP_001081011.1;NP_001082364.1		CID	1	0	1	1	32.63	0.00796806	0	16.2081	0	3	808.067	2422.19	-0.301058	102.698	11733	11733	MS2	13/214	170307_chiba_PAF15_02.raw
	High	LMDLDVEQLGIPEQEYSCVIK	Unambiguous	4	2	NP_001081011.1;NP_001082364.1		CID	1	0	1	1	32.56	0.00809754	0	9.88234	1	3	808.067	2422.19	-0.225463	143.899	17207	17207	MS2	16/214	170307_chiba_PAF15_02.raw
	High	DLIDEACWDITSSGISLQSMDSSHVSLVQLTLR	Unambiguous	4	2	NP_001081011.1;NP_001082364.1		CID	1	0	1	1	32.55	0.00569802	0	20.5145	29	3	1207.26	3619.76	-1.36697	153.95	18371	18371	MS2	28/346	170307_chiba_PAF15_02.raw
	High	LMDLDVEQLGIPEQEYSCVIK	Unambiguous	4	2	NP_001081011.1;NP_001082364.1		CID	1	0	1	1	32.54	0.00816277	0	16.8426	1	2	1211.6	2422.19	-0.345903	105.972	12176	12176	MS2	9/214	170307_chiba_PAF15_02.raw
	High	SDGFDTYR	Unambiguous	4	2	NP_001081011.1;NP_001082364.1		CID	1	0	1	1	32.36	0.000929223	0	54.0106	0	2	480.706	960.405	-0.733445	46.532	3695	3695	MS2	7/66	170307_chiba_PAF15_02.raw
	High	YLNFFTK	Unambiguous	4	2	NP_001081011.1;NP_001082364.1		CID	1	0	1	1	32.26	0.0100138	0	0	2	2	466.747	932.487	-0.975205	124.988	14705	14705	MS2	6/56	170307_chiba_PAF15_02.raw
	High	LMDLDVEQLGIPEQEYSCVIK	Unambiguous	4	2	NP_001081011.1;NP_001082364.1		CID	1	0	1	1	32.14	0.00760623	0	47.136	2	2	1211.6	2422.19	1.56917	117.39	13697	13697	MS2	7/214	170307_chiba_PAF15_02.raw
	High	MPSGEFAR	Unambiguous	4	2	NP_001081011.1;NP_001082364.1		CID	1	0	1	1	32.12	0.00331431	0	8.04314	11	2	447.71	894.413	-1.02958	145.56	17421	17421	MS2	7/60	170307_chiba_PAF15_02.raw
	High	LVQGSILK	Unambiguous	4	2	NP_001081011.1;NP_001082364.1		CID	1	0	1	1	31.88	0.0129403	0	38.1005	3	2	429.276	857.545	-0.999367	131.286	15542	15542	MS2	7/66	170307_chiba_PAF15_02.raw
	High	YLNFFTK	Unambiguous	4	2	NP_001081011.1;NP_001082364.1		CID	1	0	1	1	31.88	0.0109295	0	29.9354	0	2	466.747	932.487	-0.90975	72.1173	7490	7490	MS2	6/56	170307_chiba_PAF15_02.raw
	High	LSQTSNVDKEEEAVTIEMNEPVQLTFALR	Unambiguous	4	2	NP_001081011.1;NP_001082364.1		CID	1	0	1	1	31.86	0.0045614	1	4.6487	0	3	1097.89	3291.64	0.0314067	101.577	11581	11581	MS2	27/322	170307_chiba_PAF15_02.raw
	High	YLNFFTK	Unambiguous	4	2	NP_001081011.1;NP_001082364.1		CID	1	0	1	1	31.58	0.0117112	0	20.1643	0	2	466.747	932.487	-1.04066	78.3204	8374	8374	MS2	9/56	170307_chiba_PAF15_02.raw
	High	LVQGSILK	Unambiguous	4	2	NP_001081011.1;NP_001082364.1		CID	1	0	1	1	31.4	0.0144525	0	13.4963	3	2	429.276	857.545	-0.999367	127.494	15040	15040	MS2	6/66	170307_chiba_PAF15_02.raw
	High	LVQGSILK	Unambiguous	4	2	NP_001081011.1;NP_001082364.1		CID	1	0	1	1	31.36	0.0145862	0	16.7586	3	2	429.276	857.545	-0.572321	123.574	14518	14518	MS2	5/66	170307_chiba_PAF15_02.raw
	High	AEDNADTVTMVFESPNQEK	Unambiguous	4	2	NP_001081011.1;NP_001082364.1		CID	1	0	1	1	31.26	0.0035164	0	35.3941	4	2	1062.97	2124.94	-0.391202	93.1552	10444	10444	MS2	19/206	170307_chiba_PAF15_02.raw
	High	ATPLSPTVILSMSADIPLVVEYK	Unambiguous	3	2	NP_001081011.1;NP_001082364.1		CID	1	0	1	1	31.16	0.00600993	0	2.81993	0	3	815.451	2444.34	0.772944	142.466	17017	17017	MS2	14/214	170307_chiba_PAF15_02.raw
	High	LMDLDVEQLGIPEQEYSCVIK	Unambiguous	4	2	NP_001081011.1;NP_001082364.1		CID	1	0	1	1	30.92	0.0110442	0	43.6229	3	2	1211.6	2422.19	0.863617	131.123	15520	15520	MS2	11/214	170307_chiba_PAF15_02.raw
	High	YLNFFTK	Unambiguous	4	2	NP_001081011.1;NP_001082364.1		CID	1	0	1	1	30.85	0.021995	0	9.03058	17	2	466.748	932.489	0.922965	146.983	17594	17594	MS2	9/56	170307_chiba_PAF15_02.raw
	High	VSDYEMK	Unambiguous	4	2	NP_001081011.1;NP_001082364.1		CID	1	0	1	1	30.82	0.0042639	0	45.397	0	2	436.196	871.385	-1.59611	43.3079	3192	3192	MS2	6/54	170307_chiba_PAF15_02.raw
	High	LVQGSILK	Unambiguous	4	2	NP_001081011.1;NP_001082364.1		CID	1	0	1	1	30.67	0.0170979	0		1	2	429.276	857.545	-1.14172	64.9313	6474	6474	MS2	6/66	170307_chiba_PAF15_02.raw
	High	LMDLDVEQLGIPEQEYSCVIK	Unambiguous	4	2	NP_001081011.1;NP_001082364.1		CID	1	0	1	1	30.59	0.012789	0	33.6501	0	2	1211.6	2422.19	-0.446697	101.119	11519	11519	MS2	8/214	170307_chiba_PAF15_02.raw
	High	MPSGEFAR	Unambiguous	4	2	NP_001081011.1;NP_001082364.1		CID	1	0	1	1	30.53	0.00469111	0	0	5	2	447.711	894.414	0.0622679	144.327	17264	17264	MS2	7/60	170307_chiba_PAF15_02.raw
	High	LVQGSILK	Unambiguous	4	2	NP_001081011.1;NP_001082364.1		CID	1	0	1	1	30.34	0.0184477	0	44.3402	1	2	429.276	857.545	-0.71467	59.3572	5648	5648	MS2	6/66	170307_chiba_PAF15_02.raw
	High	LVQGSILK	Unambiguous	4	2	NP_001081011.1;NP_001082364.1		CID	1	0	1	1	30.34	0.0184477	0	29.4891	1	2	429.276	857.545	-0.358798	59.198	5625	5625	MS2	6/66	170307_chiba_PAF15_02.raw
	High	LMDLDVEQLGIPEQEYSCVIK	Unambiguous	4	2	NP_001081011.1;NP_001082364.1		CID	1	0	1	1	30.34	0.012992	0	24.9999	1	3	808.068	2422.19	0.379298	107.404	12367	12367	MS2	14/214	170307_chiba_PAF15_02.raw
	High	LMDLDVEQLGIPEQEYSCVIK	Unambiguous	4	2	NP_001081011.1;NP_001082364.1		CID	1	0	1	1	30.32	0.0137023	0	3.97811	0	3	808.068	2422.19	0.228108	96.1686	10848	10848	MS2	13/214	170307_chiba_PAF15_02.raw
	High	MPSGEFAR	Unambiguous	4	2	NP_001081011.1;NP_001082364.1		CID	1	0	1	1	30.29	0.00495765	0	19.253	6	2	447.711	894.414	0.40347	144.139	17239	17239	MS2	7/60	170307_chiba_PAF15_02.raw
	High	DLIDEACWDITSSGISLQSMDSSHVSLVQLTLR	Unambiguous	4	2	NP_001081011.1;NP_001082364.1		CID	1	0	1	1	30.29	0.0101492	0	5.40494	0	3	1207.26	3619.76	-0.355271	127.692	15067	15067	MS2	19/346	170307_chiba_PAF15_02.raw
	High	ATPLSPTVILSMSADIPLVVEYK	Unambiguous	3	2	NP_001081011.1;NP_001082364.1		CID	1	0	1	1	30.22	0.00746225	0	5.46644	3	3	815.451	2444.34	0.548214	152.289	18191	18191	MS2	24/214	170307_chiba_PAF15_02.raw
	High	LVQGSILK	Unambiguous	4	2	NP_001081011.1;NP_001082364.1		CID	1	0	1	1	30.18	0.01914	0	31.8233	2	2	429.276	857.545	-0.999367	127.675	15065	15065	MS2	7/66	170307_chiba_PAF15_02.raw
	High	LMDLDVEQLGIPEQEYSCVIK	Unambiguous	4	2	NP_001081011.1;NP_001082364.1		CID	1	0	1	1	30.15	0.0140077	0	9.96729	19	3	808.067	2422.19	-0.603438	151.83	18139	18139	MS2	15/214	170307_chiba_PAF15_02.raw
	High	LMDLDVEQLGIPEQEYSCVIK	Unambiguous	4	2	NP_001081011.1;NP_001082364.1		CID	1	0	1	1	30.13	0.014218	0	2.94641	0	3	808.067	2422.19	-0.376653	93.8094	10532	10532	MS2	16/214	170307_chiba_PAF15_02.raw
	High	LMDLDVEQLGIPEQEYSCVIK	Unambiguous	4	2	NP_001081011.1;NP_001082364.1		CID	1	0	1	1	30.11	0.0142836	0	34.9758	2	2	1211.6	2422.19	-0.345903	130.44	15430	15430	MS2	11/214	170307_chiba_PAF15_02.raw
	High	MPSGEFAR	Unambiguous	4	2	NP_001081011.1;NP_001082364.1		CID	1	0	1	1	30.04	0.00465691	0	33.5629	4	2	447.71	894.413	-0.551896	137.686	16388	16388	MS2	6/60	170307_chiba_PAF15_02.raw
	High	SDGFDTYR	Unambiguous	4	2	NP_001081011.1;NP_001082364.1		CID	1	0	1	1	30.01	0.000995337	0	60.5527	1	2	480.707	960.406	0.092724	47.8698	3901	3901	MS2	7/66	170307_chiba_PAF15_02.raw
	High	LMDLDVEQLGIPEQEYSCVIK	Unambiguous	4	2	NP_001081011.1;NP_001082364.1		CID	1	0	1	1	29.86	0.0148201	0	11.6939	0	3	808.068	2422.19	0.00132273	105.207	12073	12073	MS2	19/214	170307_chiba_PAF15_02.raw
	High	MPSGEFAR	Unambiguous	4	2	NP_001081011.1;NP_001082364.1		CID	1	0	1	1	29.8	0.00565449	0	21.078	0	2	447.71	894.413	-1.16606	46.207	3645	3645	MS2	7/60	170307_chiba_PAF15_02.raw
	High	ATPLSPTVILSMSADIPLVVEYK	Unambiguous	3	2	NP_001081011.1;NP_001082364.1		CID	1	0	1	1	29.72	0.00789281	0	10.2232	0	3	815.45	2444.33	-0.500527	137.703	16390	16390	MS2	16/214	170307_chiba_PAF15_02.raw
	High	LMDLDVEQLGIPEQEYSCVIK	Unambiguous	4	2	NP_001081011.1;NP_001082364.1		CID	1	0	1	1	29.63	0.0159528	0	22.2878	26	3	808.067	2422.19	-0.376653	152.769	18244	18244	MS2	17/214	170307_chiba_PAF15_02.raw
	High	LSQTSNVDKEEEAVTIEMNEPVQLTFALR	Unambiguous	4	2	NP_001081011.1;NP_001082364.1		CID	1	0	1	1	29.61	0.00869695	1	4.08445	0	3	1097.89	3291.64	-0.302358	109.393	12631	12631	MS2	10/322	170307_chiba_PAF15_02.raw
	High	LMDLDVEQLGIPEQEYSCVIK	Unambiguous	4	2	NP_001081011.1;NP_001082364.1		CID	1	0	1	1	29.57	0.0151259	0	27.098	2	2	1211.6	2422.19	0.762824	116.672	13602	13602	MS2	12/214	170307_chiba_PAF15_02.raw
	High	MPSGEFAR	Unambiguous	4	2	NP_001081011.1;NP_001082364.1		CID	1	0	1	1	29.45	0.00601556	0	25.8587	5	2	447.711	894.414	0.266989	154.372	18419	18419	MS2	7/60	170307_chiba_PAF15_02.raw
	High	LMDLDVEQLGIPEQEYSCVIK	Unambiguous	4	2	NP_001081011.1;NP_001082364.1		CID	1	0	1	1	29.4	0.0156723	0	8.20896	7	3	808.068	2422.19	0.832868	147.627	17672	17672	MS2	16/214	170307_chiba_PAF15_02.raw
	High	MPSGEFAR	Unambiguous	4	2	NP_001081011.1;NP_001082364.1		CID	1	0	1	1	29.24	0.00952994	0	10.4353	0	2	447.709	894.411	-2.87208	47.4407	3837	3837	MS2	6/60	170307_chiba_PAF15_02.raw
	High	YLNFFTK	Unambiguous	4	2	NP_001081011.1;NP_001082364.1		CID	1	0	1	1	29.22	0.0183101	0	44.0079	17	2	466.747	932.488	0.0720623	150.567	17992	17992	MS2	5/56	170307_chiba_PAF15_02.raw
	High	YLNFFTK	Unambiguous	4	2	NP_001081011.1;NP_001082364.1		CID	1	0	1	1	28.88	0.0218072	0	32.2237	1	2	466.747	932.487	-0.713388	85.3886	9374	9374	MS2	6/56	170307_chiba_PAF15_02.raw
	High	LVQGSILK	Unambiguous	4	2	NP_001081011.1;NP_001082364.1		CID	1	0	1	1	28.82	0.0261784	0	52.2111	1	2	429.276	857.545	-0.643495	54.1316	4870	4870	MS2	6/66	170307_chiba_PAF15_02.raw
	High	YLNFFTK	Unambiguous	4	2	NP_001081011.1;NP_001082364.1		CID	1	0	1	1	28.75	0.0204029	0	0	1	2	466.747	932.487	-0.517025	83.009	9035	9035	MS2	6/56	170307_chiba_PAF15_02.raw
	High	MPSGEFAR	Unambiguous	4	2	NP_001081011.1;NP_001082364.1		CID	1	0	1	1	28.62	0.0190992	0	33.1433	15	2	447.711	894.416	1.90475	146.404	17523	17523	MS2	10/60	170307_chiba_PAF15_02.raw
	High	LMDLDVEQLGIPEQEYSCVIK	Unambiguous	4	2	NP_001081011.1;NP_001082364.1		CID	1	0	1	1	28.43	0.0203122	0	22.6443	1	3	808.068	2422.19	-0.0742723	129.664	15328	15328	MS2	13/214	170307_chiba_PAF15_02.raw
	High	LMDLDVEQLGIPEQEYSCVIK	Unambiguous	4	2	NP_001081011.1;NP_001082364.1		CID	1	0	1	1	28.04	0.0225347	0	40.0514	1	3	808.068	2422.19	0.00132273	128.898	15227	15227	MS2	14/214	170307_chiba_PAF15_02.raw
	High	LVQGSILK	Unambiguous	4	2	NP_001081011.1;NP_001082364.1		CID	1	0	1	1	27.89	0.0308854	0	47.9739	2	2	429.277	857.546	0.352944	57.679	5402	5402	MS2	6/66	170307_chiba_PAF15_02.raw
	High	AEDNADTVTMVFESPNQEK	Unambiguous	4	2	NP_001081011.1;NP_001082364.1		CID	1	0	1	1	27.88	0.00668011	0	52.242	1	3	708.985	2124.94	0.521614	77.9565	8323	8323	MS2	17/206	170307_chiba_PAF15_02.raw
	High	LMDLDVEQLGIPEQEYSCVIK	Unambiguous	4	2	NP_001081011.1;NP_001082364.1		CID	1	0	1	1	27.88	0.0230545	0	22.0385	0	3	808.068	2422.19	-0.0742723	99.2692	11269	11269	MS2	15/214	170307_chiba_PAF15_02.raw
	High	AEDNADTVTMVFESPNQEK	Unambiguous	4	2	NP_001081011.1;NP_001082364.1		CID	1	0	1	1	27.72	0.00667724	0	11.2244	0	3	708.984	2124.94	-1.02944	72.5842	7555	7555	MS2	16/206	170307_chiba_PAF15_02.raw
	High	LMDLDVEQLGIPEQEYSCVIK	Unambiguous	4	2	NP_001081011.1;NP_001082364.1		CID	1	0	1	1	27.63	0.0251972	0	54.4232	1	3	808.067	2422.19	-0.679033	111.15	12866	12866	MS2	11/214	170307_chiba_PAF15_02.raw
	High	LMDLDVEQLGIPEQEYSCVIK	Unambiguous	4	2	NP_001081011.1;NP_001082364.1		CID	1	0	1	1	27.33	0.0233932	0	19.112	1	3	808.068	2422.19	0.606083	138.546	16501	16501	MS2	12/214	170307_chiba_PAF15_02.raw
	High	YLNFFTK	Unambiguous	4	2	NP_001081011.1;NP_001082364.1		CID	1	0	1	1	27.23	0.0289529	0	28.9123	2	2	466.747	932.487	-0.386117	92.3831	10339	10339	MS2	4/56	170307_chiba_PAF15_02.raw
	High	LMDLDVEQLGIPEQEYSCVIK	Unambiguous	4	2	NP_001081011.1;NP_001082364.1		CID	1	0	1	1	27.1	0.0246655	0	48.7683	2	2	1211.6	2422.19	0.561238	116.05	13519	13519	MS2	10/214	170307_chiba_PAF15_02.raw
	High	YLNFFTK	Unambiguous	4	2	NP_001081011.1;NP_001082364.1		CID	1	0	1	1	26.74	0.055607	0	19.0588	1	2	466.747	932.486	-1.6952	81.1782	8779	8779	MS2	6/56	170307_chiba_PAF15_02.raw
XP_018089524.1	PREDICTED: formimidoyltransferase cyclodeaminase L homeolog isoform X1 [Xenopus laevis]	40836.3	81.67	3	34	34	623	540	59.0827	6.23975
	Confidence Level	Sequence	PSM Ambiguity	# Proteins	# Protein Groups	Protein Group Accessions	Modifications	Activation Type	ΔScore	ΔCn	Rank	Search Engine Rank	IonScore	Exp Value	# Missed Cleavages	Isolation Interference [%]	Ion Inject Time [ms]	Charge	m/z [Da]	MH+ [Da]	ΔM [ppm]	RT [min]	First Scan	Last Scan	MS Order	Ions Matched	Spectrum File
	High	LLTMVDADSNAFGSYMAALK	Unambiguous	3	1	XP_018089524.1		CID	1	0	1	1	149.03	1.60033e-14	0	29.6799	3	2	1059.52	2118.02	0.117394	141.417	16879	16879	MS2	24/194	170307_chiba_PAF15_02.raw
	High	LLTMVDADSNAFGSYMAALK	Unambiguous	3	1	XP_018089524.1		CID	1	0	1	1	147.49	2.27253e-14	0	34.6337	3	2	1059.52	2118.03	0.232662	136.949	16291	16291	MS2	25/194	170307_chiba_PAF15_02.raw
	High	LLTMVDADSNAFGSYMAALK	Unambiguous	3	1	XP_018089524.1		CID	1	0	1	1	144.49	5.15665e-14	0	26.3484	3	2	1059.52	2118.03	0.34793	135.349	16080	16080	MS2	27/194	170307_chiba_PAF15_02.raw
	High	LLTMVDADSNAFGSYMAALK	Unambiguous	3	1	XP_018089524.1		CID	1	0	1	1	143.25	6.19828e-14	0	39.5053	2	2	1059.52	2118.02	-0.113143	125.698	14799	14799	MS2	14/194	170307_chiba_PAF15_02.raw
	High	LLTMVDADSNAFGSYMAALK	Unambiguous	3	1	XP_018089524.1		CID	1	0	1	1	142.87	7.10073e-14	0	33.529	2	2	1059.52	2118.02	0.00212551	128.058	15116	15116	MS2	24/194	170307_chiba_PAF15_02.raw
	High	LLTMVDADSNAFGSYMAALK	Unambiguous	3	1	XP_018089524.1		CID	1	0	1	1	142.32	8.61623e-14	0	19.6187	6	2	1059.52	2118.03	0.578466	144.109	17235	17235	MS2	27/194	170307_chiba_PAF15_02.raw
	High	LLTMVDADSNAFGSYMAALK	Unambiguous	3	1	XP_018089524.1		CID	1	0	1	1	140.13	1.40724e-13	0	23.3763	0	2	1059.52	2118.03	0.34793	98.8001	11206	11206	MS2	13/194	170307_chiba_PAF15_02.raw
	High	LLTMVDADSNAFGSYMAALK	Unambiguous	3	1	XP_018089524.1		CID	1	0	1	1	139.93	1.29572e-13	0	29.1927	1	2	1059.52	2118.03	0.232662	114.008	13246	13246	MS2	13/194	170307_chiba_PAF15_02.raw
	High	LLTMVDADSNAFGSYMAALK	Unambiguous	3	1	XP_018089524.1		CID	1	0	1	1	139.51	1.65117e-13	0	47.6184	1	2	1059.52	2118.02	-0.689483	109.117	12595	12595	MS2	13/194	170307_chiba_PAF15_02.raw
	High	LLTMVDADSNAFGSYMAALK	Unambiguous	3	1	XP_018089524.1		CID	1	0	1	1	139.43	1.57354e-13	0	26.9096	1	2	1059.52	2118.02	-0.343679	124.927	14697	14697	MS2	13/194	170307_chiba_PAF15_02.raw
	High	LLTMVDADSNAFGSYMAALK	Unambiguous	3	1	XP_018089524.1		CID	1	0	1	1	139.07	1.69715e-13	0	19.2842	1	2	1059.52	2118.02	-0.228411	118.281	13815	13815	MS2	13/194	170307_chiba_PAF15_02.raw
	High	LLTMVDADSNAFGSYMAALK	Unambiguous	3	1	XP_018089524.1		CID	1	0	1	1	139	1.72473e-13	0	8.83662	0	2	1059.52	2118.02	-0.228411	100.349	11415	11415	MS2	23/194	170307_chiba_PAF15_02.raw
	High	LLTMVDADSNAFGSYMAALK	Unambiguous	3	1	XP_018089524.1		CID	1	0	1	1	138.85	1.79837e-13	0	26.7334	2	2	1059.52	2118.02	-0.343679	127.263	15009	15009	MS2	14/194	170307_chiba_PAF15_02.raw
	High	LLTMVDADSNAFGSYMAALK	Unambiguous	3	1	XP_018089524.1		CID	1	0	1	1	138.84	1.71108e-13	0	20.5919	1	2	1059.52	2118.02	-0.113143	105.964	12175	12175	MS2	13/194	170307_chiba_PAF15_02.raw
	High	LLTMVDADSNAFGSYMAALK	Unambiguous	3	1	XP_018089524.1		CID	1	0	1	1	138.7	1.84808e-13	0	39.2498	2	2	1059.52	2118.02	-0.228411	132.487	15702	15702	MS2	14/194	170307_chiba_PAF15_02.raw
	High	LLTMVDADSNAFGSYMAALK	Unambiguous	3	1	XP_018089524.1		CID	1	0	1	1	138.65	2.00594e-13	0	33.7518	4	2	1059.52	2118.03	0.578466	139.382	16611	16611	MS2	27/194	170307_chiba_PAF15_02.raw
	High	LLTMVDADSNAFGSYMAALK	Unambiguous	3	1	XP_018089524.1		CID	1	0	1	1	134.7	4.96407e-13	0	24.761	0	2	1059.52	2118.03	0.463198	98.3213	11141	11141	MS2	26/194	170307_chiba_PAF15_02.raw
	High	LLTMVDADSNAFGSYMAALK	Unambiguous	3	1	XP_018089524.1		CID	1	0	1	1	134.32	5.41798e-13	0	30.3056	59	2	1059.52	2118.03	0.463198	151.295	18075	18075	MS2	14/194	170307_chiba_PAF15_02.raw
	High	ALETGVFGAYFNVLINLR	Unambiguous	3	1	XP_018089524.1		CID	1	0	1	1	133.16	4.44414e-13	0	34.9462	2	2	999.047	1997.09	0.151084	134.049	15909	15909	MS2	14/150	170307_chiba_PAF15_02.raw
	High	LLTMVDADSNAFGSYMAALK	Unambiguous	3	1	XP_018089524.1		CID	1	0	1	1	132.34	8.02237e-13	0	35.4284	2	2	1059.52	2118.02	0.00212551	133.604	15851	15851	MS2	16/194	170307_chiba_PAF15_02.raw
	High	LLTMVDADSNAFGSYMAALK	Unambiguous	3	1	XP_018089524.1		CID	1	0	1	1	132.07	8.13338e-13	0	9.25961	6	2	1059.52	2118.02	-0.113143	144.014	17223	17223	MS2	13/194	170307_chiba_PAF15_02.raw
	High	LLTMVDADSNAFGSYMAALK	Unambiguous	3	1	XP_018089524.1		CID	1	0	1	1	131.86	9.57894e-13	0	25.7983	31	2	1059.52	2118.03	0.578466	151.122	18058	18058	MS2	13/194	170307_chiba_PAF15_02.raw
	High	LLTMVDADSNAFGSYMAALK	Unambiguous	3	1	XP_018089524.1		CID	1	0	1	1	131.83	1.04655e-12	0	8.08765	22	2	1059.52	2118.03	0.809001	148.97	17824	17824	MS2	13/194	170307_chiba_PAF15_02.raw
	High	LLTMVDADSNAFGSYMAALK	Unambiguous	3	1	XP_018089524.1		CID	1	0	1	1	131.82	1.04568e-12	0	37.0446	3	2	1059.52	2118.02	-0.574215	137.755	16397	16397	MS2	13/194	170307_chiba_PAF15_02.raw
	High	LLTMVDADSNAFGSYMAALK	Unambiguous	3	1	XP_018089524.1		CID	1	0	1	1	131.73	9.19858e-13	0	36.4976	4	2	1059.52	2118.02	-0.228411	137.96	16424	16424	MS2	27/194	170307_chiba_PAF15_02.raw
	High	LLTMVDADSNAFGSYMAALK	Unambiguous	3	1	XP_018089524.1		CID	1	0	1	1	131.69	9.35145e-13	0	18.3003	2	2	1059.52	2118.02	-0.343679	134.392	15955	15955	MS2	13/194	170307_chiba_PAF15_02.raw
	High	LLTMVDADSNAFGSYMAALK	Unambiguous	3	1	XP_018089524.1		CID	1	0	1	1	131.54	9.18906e-13	0	3.01731	0	2	1059.52	2118.02	-0.113143	96.6155	10910	10910	MS2	13/194	170307_chiba_PAF15_02.raw
	High	LLTMVDADSNAFGSYMAALK	Unambiguous	3	1	XP_018089524.1		CID	1	0	1	1	130.93	1.10591e-12	0	27.2756	3	2	1059.52	2118.02	-0.228411	134.636	15987	15987	MS2	25/194	170307_chiba_PAF15_02.raw
	High	LLTMVDADSNAFGSYMAALK	Unambiguous	3	1	XP_018089524.1		CID	1	0	1	1	129.51	1.54482e-12	0	14.1641	1	2	1059.52	2118.02	-0.343679	103.327	11818	11818	MS2	13/194	170307_chiba_PAF15_02.raw
	High	IIEYLVQDDLSEASLVTQSLR	Unambiguous	3	1	XP_018089524.1		CID	1	0	1	1	128.51	1.47271e-12	0	18.7364	1	2	1196.63	2392.26	0.449386	113.028	13116	13116	MS2	13/220	170307_chiba_PAF15_02.raw
	High	IIEYLVQDDLSEASLVTQSLR	Unambiguous	3	1	XP_018089524.1		CID	1	0	1	1	128.22	1.92092e-12	0	6.42554	35	2	1196.63	2392.26	-0.16294	150.193	17953	17953	MS2	13/220	170307_chiba_PAF15_02.raw
	High	IIEYLVQDDLSEASLVTQSLR	Unambiguous	3	1	XP_018089524.1		CID	1	0	1	1	127.88	2.41136e-12	0	45.1323	3	2	1196.63	2392.26	-1.28554	133.925	15893	15893	MS2	13/220	170307_chiba_PAF15_02.raw
	High	NKEVIDALAAAITQTGGCR	Unambiguous	2	1	XP_018089524.1		CID	1	0	1	1	127.84	2.409e-12	1	16.9064	0	2	966.004	1931	-0.356918	83.2149	9063	9063	MS2	28/204	170307_chiba_PAF15_02.raw
	High	LLTMVDADSNAFGSYMAALK	Unambiguous	3	1	XP_018089524.1		CID	1	0	1	1	126.39	3.37534e-12	0	38.3084	2	2	1059.52	2118.03	0.578466	124.126	14591	14591	MS2	12/194	170307_chiba_PAF15_02.raw
	High	IIEYLVQDDLSEASLVTQSLR	Unambiguous	3	1	XP_018089524.1		CID	1	0	1	1	126.26	3.06387e-12	0	41.3821	8	2	1196.63	2392.26	0.143223	144.123	17237	17237	MS2	14/220	170307_chiba_PAF15_02.raw
	High	LLTMVDADSNAFGSYMAALK	Unambiguous	3	1	XP_018089524.1		CID	1	0	1	1	126	3.21521e-12	0	18.7037	2	2	1059.52	2118.02	0.117394	117.828	13755	13755	MS2	12/194	170307_chiba_PAF15_02.raw
	High	LLTMVDADSNAFGSYMAALK	Unambiguous	3	1	XP_018089524.1		CID	1	0	1	1	125.98	3.45717e-12	0	21.6687	1	2	1059.52	2118.02	-0.228411	104.465	11972	11972	MS2	12/194	170307_chiba_PAF15_02.raw
	High	LLTMVDADSNAFGSYMAALK	Unambiguous	3	1	XP_018089524.1		CID	1	0	1	1	125.66	4.31914e-12	0	28.4153	2	2	1059.52	2118.02	-0.574215	117.654	13732	13732	MS2	12/194	170307_chiba_PAF15_02.raw
	High	LLTMVDADSNAFGSYMAALK	Unambiguous	3	1	XP_018089524.1		CID	1	0	1	1	125.53	4.10051e-12	0	17.5682	1	2	1059.52	2118.03	0.463198	115.575	13455	13455	MS2	12/194	170307_chiba_PAF15_02.raw
	High	LLTMVDADSNAFGSYMAALK	Unambiguous	3	1	XP_018089524.1		CID	1	0	1	1	125.21	3.85665e-12	0	18.204	0	2	1059.52	2118.02	0.117394	105.2	12072	12072	MS2	12/194	170307_chiba_PAF15_02.raw
	High	LLTMVDADSNAFGSYMAALK	Unambiguous	3	1	XP_018089524.1		CID	1	0	1	1	125.16	4.41945e-12	0	6.8753	1	2	1059.52	2118.03	0.34793	103.661	11863	11863	MS2	13/194	170307_chiba_PAF15_02.raw
	High	LLTMVDADSNAFGSYMAALK	Unambiguous	3	1	XP_018089524.1		CID	1	0	1	1	123.24	6.0703e-12	0	15.7181	0	2	1059.52	2118.02	0.117394	106.732	12278	12278	MS2	14/194	170307_chiba_PAF15_02.raw
	High	IIEYLVQDDLSEASLVTQSLR	Unambiguous	3	1	XP_018089524.1		CID	1	0	1	1	122.77	5.41656e-12	0	38.8083	7	2	1196.63	2392.26	0.347332	132.878	15754	15754	MS2	12/220	170307_chiba_PAF15_02.raw
	High	LLTMVDADSNAFGSYMAALK	Unambiguous	3	1	XP_018089524.1		CID	1	0	1	1	122.46	7.86049e-12	0	23.704	2	2	1059.52	2118.02	-0.458947	136.154	16186	16186	MS2	27/194	170307_chiba_PAF15_02.raw
	High	IIEYLVQDDLSEASLVTQSLR	Unambiguous	3	1	XP_018089524.1		CID	1	0	1	1	122.45	7.25287e-12	0	36.2721	5	2	1196.63	2392.26	-0.469103	128.543	15181	15181	MS2	12/220	170307_chiba_PAF15_02.raw
	High	IIEYLVQDDLSEASLVTQSLR	Unambiguous	3	1	XP_018089524.1		CID	1	0	1	1	122.35	6.08298e-12	0	47.2836	6	2	1196.63	2392.26	0.449386	139.023	16564	16564	MS2	12/220	170307_chiba_PAF15_02.raw
	High	IIEYLVQDDLSEASLVTQSLR	Unambiguous	3	1	XP_018089524.1		CID	1	0	1	1	122.33	7.30988e-12	0	31.8491	2	2	1196.63	2392.26	0.755549	118.274	13814	13814	MS2	12/220	170307_chiba_PAF15_02.raw
	High	IIEYLVQDDLSEASLVTQSLR	Unambiguous	3	1	XP_018089524.1		CID	1	0	1	1	122.05	8.07737e-12	0	20.1425	1	2	1196.63	2392.26	0.0411687	120.796	14149	14149	MS2	13/220	170307_chiba_PAF15_02.raw
	High	ALETGVFGAYFNVLINLR	Unambiguous	3	1	XP_018089524.1		CID	1	0	1	1	122.01	4.91015e-12	0	44.8592	6	2	999.047	1997.09	0.945698	140.668	16781	16781	MS2	14/150	170307_chiba_PAF15_02.raw
	High	LLTMVDADSNAFGSYMAALK	Unambiguous	3	1	XP_018089524.1		CID	1	0	1	1	121.06	1.07722e-11	0	34.0873	1	2	1059.52	2118.02	0.00212551	109.927	12703	12703	MS2	13/194	170307_chiba_PAF15_02.raw
	High	LLTMVDADSNAFGSYMAALK	Unambiguous	3	1	XP_018089524.1		CID	1	0	1	1	121.04	1.15302e-11	0	41.0279	2	2	1059.52	2118.03	0.463198	117.997	13778	13778	MS2	13/194	170307_chiba_PAF15_02.raw
	High	IIEYLVQDDLSEASLVTQSLR	Unambiguous	3	1	XP_018089524.1		CID	1	0	1	1	118.6	1.41489e-11	0	32.6675	1	2	1196.63	2392.26	0.347332	113.856	13226	13226	MS2	26/220	170307_chiba_PAF15_02.raw
	High	LLTMVDADSNAFGSYMAALK	Unambiguous	3	1	XP_018089524.1		CID	1	0	1	1	118.48	1.81639e-11	0	20.7848	1	2	1059.52	2118.02	0.117394	112.085	12990	12990	MS2	12/194	170307_chiba_PAF15_02.raw
	High	LLTMVDADSNAFGSYMAALK	Unambiguous	3	1	XP_018089524.1		CID	1	0	1	1	118.45	2.15763e-11	0	40.2578	14	2	1059.52	2118.03	1.27007	146.641	17551	17551	MS2	12/194	170307_chiba_PAF15_02.raw
	High	LLTMVDADSNAFGSYMAALK	Unambiguous	3	1	XP_018089524.1		CID	1	0	1	1	118.31	2.35375e-11	0	19.4689	10	2	1059.52	2118.03	0.924269	144.932	17342	17342	MS2	12/194	170307_chiba_PAF15_02.raw
	High	LLTMVDADSNAFGSYMAALK	Unambiguous	3	1	XP_018089524.1		CID	1	0	1	1	118.31	2.13977e-11	0	18.7539	7	2	1059.52	2118.03	1.38534	145.719	17440	17440	MS2	12/194	170307_chiba_PAF15_02.raw
	High	LLTMVDADSNAFGSYMAALK	Unambiguous	3	1	XP_018089524.1		CID	1	0	1	1	118.22	2.17705e-11	0	32.9757	2	2	1059.52	2118.03	1.84641	143.344	17133	17133	MS2	12/194	170307_chiba_PAF15_02.raw
	High	LLTMVDADSNAFGSYMAALK	Unambiguous	3	1	XP_018089524.1		CID	1	0	1	1	118.18	1.99192e-11	0	7.82655	2	2	1059.52	2118.02	-0.113143	129.657	15327	15327	MS2	12/194	170307_chiba_PAF15_02.raw
	High	LLTMVDADSNAFGSYMAALK	Unambiguous	3	1	XP_018089524.1		CID	1	0	1	1	118.14	2.1101e-11	0	12.0458	1	2	1059.52	2118.02	0.00212551	130.902	15491	15491	MS2	12/194	170307_chiba_PAF15_02.raw
	High	LLTMVDADSNAFGSYMAALK	Unambiguous	3	1	XP_018089524.1		CID	1	0	1	1	117.98	2.03803e-11	0	19.3674	0	2	1059.52	2118.02	0.117394	99.5814	11312	11312	MS2	12/194	170307_chiba_PAF15_02.raw
	High	LLTMVDADSNAFGSYMAALK	Unambiguous	3	1	XP_018089524.1		CID	1	0	1	1	117.75	2.14887e-11	0	29.4917	1	2	1059.52	2118.02	0.117394	113.173	13135	13135	MS2	12/194	170307_chiba_PAF15_02.raw
	High	ALETGVFGAYFNVLINLR	Unambiguous	3	1	XP_018089524.1		CID	1	0	1	1	117.32	1.44575e-11	0	36.5029	4	2	999.047	1997.09	0.395581	138.405	16483	16483	MS2	14/150	170307_chiba_PAF15_02.raw
	High	IIEYLVQDDLSEASLVTQSLR	Unambiguous	3	1	XP_018089524.1		CID	1	0	1	1	117.11	2.48033e-11	0	35.3565	1	2	1196.63	2392.26	-0.264994	111.493	12912	12912	MS2	13/220	170307_chiba_PAF15_02.raw
	High	IIEYLVQDDLSEASLVTQSLR	Unambiguous	3	1	XP_018089524.1		CID	1	0	1	1	115.91	3.46205e-11	0	41.4985	4	2	1196.63	2392.26	-0.673212	130.052	15379	15379	MS2	14/220	170307_chiba_PAF15_02.raw
	High	IIEYLVQDDLSEASLVTQSLR	Unambiguous	3	1	XP_018089524.1		CID	1	0	1	1	115.83	2.67747e-11	0	29.1549	1	2	1196.63	2392.26	0.245277	111.352	12893	12893	MS2	12/220	170307_chiba_PAF15_02.raw
	High	IIEYLVQDDLSEASLVTQSLR	Unambiguous	3	1	XP_018089524.1		CID	1	0	1	1	115.8	2.74863e-11	0	35.6108	2	2	1196.63	2392.26	0.449386	123.48	14505	14505	MS2	12/220	170307_chiba_PAF15_02.raw
	High	IIEYLVQDDLSEASLVTQSLR	Unambiguous	3	1	XP_018089524.1		CID	1	0	1	1	115.79	3.55905e-11	0	35.5231	6	2	1196.63	2392.26	-0.673212	135.234	16065	16065	MS2	12/220	170307_chiba_PAF15_02.raw
	High	IIEYLVQDDLSEASLVTQSLR	Unambiguous	3	1	XP_018089524.1		CID	1	0	1	1	115.77	3.04578e-11	0	20.4746	1	2	1196.64	2392.26	1.06171	114.58	13321	13321	MS2	12/220	170307_chiba_PAF15_02.raw
	High	ALETGVFGAYFNVLINLR	Unambiguous	3	1	XP_018089524.1		CID	1	0	1	1	115.74	2.45351e-11	0	56.3271	23	2	999.046	1997.09	0.0288359	146.143	17491	17491	MS2	13/150	170307_chiba_PAF15_02.raw
	High	IIEYLVQDDLSEASLVTQSLR	Unambiguous	3	1	XP_018089524.1		CID	1	0	1	1	115.74	3.05355e-11	0	18.4071	51	2	1196.64	2392.26	0.959657	149.517	17882	17882	MS2	12/220	170307_chiba_PAF15_02.raw
	High	IIEYLVQDDLSEASLVTQSLR	Unambiguous	3	1	XP_018089524.1		CID	1	0	1	1	115.67	3.11672e-11	0	32.4226	5	2	1196.63	2392.26	0.55144	136.995	16297	16297	MS2	12/220	170307_chiba_PAF15_02.raw
	High	IIEYLVQDDLSEASLVTQSLR	Unambiguous	3	1	XP_018089524.1		CID	1	0	1	1	115.61	2.87155e-11	0	53.2509	5	2	1196.63	2392.26	0.449386	139.884	16677	16677	MS2	12/220	170307_chiba_PAF15_02.raw
	High	IIEYLVQDDLSEASLVTQSLR	Unambiguous	3	1	XP_018089524.1		CID	1	0	1	1	115.6	3.04342e-11	0	4.63714	2	3	798.093	2392.27	2.12766	146.232	17501	17501	MS2	22/220	170307_chiba_PAF15_02.raw
	High	IIEYLVQDDLSEASLVTQSLR	Unambiguous	3	1	XP_018089524.1		CID	1	0	1	1	115.58	3.45868e-11	0	51.4713	5	2	1196.63	2392.26	0.755549	140.359	16740	16740	MS2	12/220	170307_chiba_PAF15_02.raw
	High	IIEYLVQDDLSEASLVTQSLR	Unambiguous	3	1	XP_018089524.1		CID	1	0	1	1	115.57	3.53598e-11	0	44.1049	4	2	1196.63	2392.26	-0.0608857	132.259	15672	15672	MS2	12/220	170307_chiba_PAF15_02.raw
	High	IIEYLVQDDLSEASLVTQSLR	Unambiguous	3	1	XP_018089524.1		CID	1	0	1	1	115.56	3.47464e-11	0	17.6644	61	2	1196.63	2392.26	0.653494	150.323	17968	17968	MS2	12/220	170307_chiba_PAF15_02.raw
	High	IIEYLVQDDLSEASLVTQSLR	Unambiguous	3	1	XP_018089524.1		CID	1	0	1	1	115.55	3.5523e-11	0	3.66103	0	2	1196.63	2392.26	-0.469103	101.747	11604	11604	MS2	12/220	170307_chiba_PAF15_02.raw
	High	IIEYLVQDDLSEASLVTQSLR	Unambiguous	3	1	XP_018089524.1		CID	1	0	1	1	115.53	2.92494e-11	0	21.0789	2	2	1196.63	2392.26	0.449386	125.87	14822	14822	MS2	12/220	170307_chiba_PAF15_02.raw
[truncated: 7,310 more rows]
