# Supplementary material for: The termination of UHRF1-dependent PAF15 ubiquitin signaling is regulated by USP7 and ATAD5
Source: eLife. 2023 Feb 3;12:e79013. doi: 10.7554/eLife.79013 (PMC9943068; doi:10.7554/eLife.79013)
Supplement: Supplementary file 3. [file elife-79013-supp3.xlsx]

## Sheet: Sheet1
	Supplementary Table : Oligonucleotides used in this study
	Number		Sequence (5'-3')					Description
	1		GCGGGCTTTTCCAATTTTTATGGCATGGA					xUSP7 W167A mutation
	2		GTCGTTTTCCTTATGAAAGAACAGA					xUSP7 W167A mutation
	3		AGTTACATGAATAGTTTATTGCAA					xUSP7 C225S mutation
	4		AGTTGCTCCTTGATTCTTCAATCC					xUSP7 C225S mutation
	5		CGATGACAAGGAATTCATGAACCACCATCAGCAGCA					xUSP7 amplification
	6		GGCCGCCCGGGTCGATCAGTTATGAATCTTAATTGC					xUSP7 amplification
	7		CGATGACAAGGAATTCTCGAAGAAGCACACTGGCTA					xUSP7 ΔTRAF mutation
	8		CGATGACAAGGAATTCATATAAAGATGAGC					xUSP7 UBL only mutation
	9		GGCCGCCCGGGTCGATTATTCTTGTCGCTCTTTTCT					xUSP7 ΔUBL mutation
	10		GCTGCGCTTATGGATGGTGCTATTATAGTATTTCAAAAGGATGAC					xUSP7 3A mutation
	11		AAGTGCTTTATCAAGAGAAACATC					xUSP7 3A mutation
	12		GGCGCGGATCAGATCAGATGGACTACAAAGACCAT					xUSP7 in fusion to pVL1392
	13		GGGCCCTCTAGAATTTCAGTTATGAATCTTAATTGC					xUSP7 in fusion to pVL1392
	14		GGCCGCTCGAGTCGATTAATCCCACGATACTCCATGAG					pVL1392-xUSP7 TRAF-3xFLAG
	15		GGGCCCTCTAGAATTTCATTCTTGTCGCTCTTTTCT					pVL1392-xUSP7 ΔUBL-3xFLAG
	16		TTGCACTCGAGAATTCATGGTGCGGACTAAGGCAGACT					xPAF15 amplification
	17		TTTGTAGTCGGTCGACTCATCACCCGAATCGGCCGCT					xPAF15 amplification
	18		GGCGCGGATCAGATCTCATGGTGCGGACTAAGGCAGACT					pVL1392-xPAF15-3xFLAG
	19		GGGCCCTCTAGAATTATCACCCGAATCGGC					pVL1392-xPAF15-3xFLAG
	20		GCAAAACCCAGAGCGTCCCGTCCTTTG					xPAF15 K101AK105A mutation
	21		TCCTGCACCACTGCCACCAGCTTCC					xPAF15 K101AK105A mutation
	22		GCTCAGCCTGAGAAGGAAAATAGAATTC					xPAF15 S79A mutation
	23		TGTGGATGGTGATCCAAGAAGTCT					xPAF15 S79A mutation
	24		GCTGGTGCAGGAAAAAAACCCAGAAAGT					xPAF15 S97A mutation
	25		GCCACCAGCTTCCTCATCATCAGAT					xPAF15 S97A mutation
	26		TCCTGCACCAGCGCCACCAGCTTCCTCATCAT					xPAF15 SAKA mutation
	27		TTGCACTCGAGAATTCATGGCGGCCCAGTCCACT					xDNMT1 amplification
	28		TTTGTAGTCGGTCGACTCATCTGTTTCCATCTTTTCA					xDNMT1 amplification
	29		GCCGCTCCAGAATTCATGGCGGCCCAGTCCACT					pVL1392-xDNMT1-3xFLAG
	30		CCCTCTAGACTCGAGATCTGTTTCCATCTTTTCA					pVL1392-xDNMT1-3xFLAG
	31		AGCCAAGGTTTTAGTGGCATGAACCGGT					xDNMT1 C1101S mutation
	32		GGGGGGCCCTCCGCAGAGCATTTCC					xDNMT1 C1101S mutation
	33		CACCGAAAGTAAGTGTCGATGTGC					mPAF15-gRNA-F
	34		AAACGCACATCGACACTTACTTTC					mPAF15-gRNA-R
	35		GAAAATAAGTATGCAGGAGGG					mPAF15-scr-F
	36		AGCACAGTTTTCATTTTCTCACT					mPAF15-scr-R
	37		AATTCTTCAGGCTGTCCCCTAAAGAagCTAAAAAGGAAAACCAGGCTCCTGAAGAAGCAGGAACCgcTGGCTTAGGAgcAGCAAAGAGAgcGTAAGTGTCGATGTGCTtGAAAACAAGGAAATATCCTCCTAAAAATAAGACAAACGGGATAATAATTTTAAAGTTTCTTTCAGGACTAGTGAGAAAATGAAAACTGTGC					mPAF15 SAKA donor
	38		GGGCCCCTGGGATCCATGAACCACCAGCAGCAGCAGCAGCAGCAG					USP7-1F (for pGEX6P-1 USP7)
	39		ATGCGGCCGCTCGAGTCAGTTATGGATTTTAATGGCCTTTTCAAG					USP7-1102R (for pGEX6P-1 USP7)
	40		GGATCCCAGGGGCCCCTGGAACAGA					6P-BamHI-R (for pGEX6P-1 USP7)
	41		CTCGAGCGGCCGCATCGTGACTGAC					6P-Xho-F (for pGEX6P-1 USP7)
	42		GGAGCGACTGCCTACATGAACAGCCTG					USP7-C223A-F (for C223A mutation in pGEX6P-1 USP7)
	43		CTCGAGCGGCCGCATCGTGACTGAC					USP7-C223A-R (for C223A mutation in pGEX6P-1 USP7)
	44		GGGCCCCTGGGATCCGAAGCCCATCTCTATATGCAAGTGCAGAT					USP7-560F (for pGEx6P-1 USP7 560-1102)
	45		ATAGAGATGGGCTTCGGATCCCAGGGGCCCCTGGAACAGAACTT					USP7-560R (for pGEx6P-1 USP7 560-1102)
	46		GTTCAGTCGTCGTATTAGTCATTTGTTCTT					USP7-Seq150F (for sequencing of USP7)
	47		TGTCGAGTGTTGCTCGATAATGTGGAAAAT					USP7-Seq300F (for sequencing of USP7)
	48		GCAGTCCTGGTTCATAGTGGAGATAATCAT					USP7-Seq450F (for sequencing of USP7)
	49		TTCAGAGCCTCTCTCAGACCATGGGATTTC					USP7-Seq600F (for sequencing of USP7)
	50		TGATGAACTAATGGATGGTGACATCATAGT					USP7-Seq750F (for sequencing of USP7)
	51		CTTGGGTgcAGCCAAACGCgcAGCGTGTCCGTTACAACCGGATC					PAF15_K93A_K97A-F (for K93A and K97A mutation in pGEX-ST PAF15)
	52		ACACGCTgcGCGTTTGGCTgcACCCAAGCCAGaTGAGCCCGCTT					PAF15_K93A_K97A-R (for K93A and K97A mutation in pGEX-ST PAF15)

## Sheet: Sheet2
	Supplementary Table 3: Oligonucleotides used in this study
	No.		Sequence (5'-3')					Description
	1		GCGGGCTTTTCCAATTTTTATGGCATGGA					xUSP7 W167A mutation
	2		GTCGTTTTCCTTATGAAAGAACAGA					xUSP7 W167A mutation
	3		AGTTACATGAATAGTTTATTGCAA					xUSP7 C225S mutation
	4		AGTTGCTCCTTGATTCTTCAATCC					xUSP7 C225S mutation
	5		CGATGACAAGGAATTCATGAACCACCATCAGCAGCA					xUSP7 amplification
	6		GGCCGCCCGGGTCGATCAGTTATGAATCTTAATTGC					xUSP7 amplification
	7		CGATGACAAGGAATTCTCGAAGAAGCACACTGGCTA					xUSP7 ΔTRAF mutation
	8		CGATGACAAGGAATTCATATAAAGATGAGC					xUSP7 UBL only mutation
	9		GGCCGCCCGGGTCGATTATTCTTGTCGCTCTTTTCT					xUSP7 ΔUBL mutation
	10		GCTGCGCTTATGGATGGTGCTATTATAGTATTTCAAAAGGATGAC					xUSP7 3A mutation
	11		AAGTGCTTTATCAAGAGAAACATC					xUSP7 3A mutation
	12		GGCGCGGATCAGATCAGATGGACTACAAAGACCAT					xUSP7 in fusion to pVL1392
	13		GGGCCCTCTAGAATTTCAGTTATGAATCTTAATTGC					xUSP7 in fusion to pVL1392
	14		GGCCGCTCGAGTCGATTAATCCCACGATACTCCATGAG					pVL1392-xUSP7 TRAF-3xFLAG
	15		GGGCCCTCTAGAATTTCATTCTTGTCGCTCTTTTCT					pVL1392-xUSP7 ΔUBL-3xFLAG
	16		TTGCACTCGAGAATTCATGGTGCGGACTAAGGCAGACT					xPAF15 amplification
	17		TTTGTAGTCGGTCGACTCATCACCCGAATCGGCCGCT					xPAF15 amplification
	18		GGCGCGGATCAGATCTCATGGTGCGGACTAAGGCAGACT					pVL1392-xPAF15-3xFLAG
	19		GGGCCCTCTAGAATTATCACCCGAATCGGC					pVL1392-xPAF15-3xFLAG
	20		GCAAAACCCAGAGCGTCCCGTCCTTTG					xPAF15 K101AK105A mutation
	21		TCCTGCACCACTGCCACCAGCTTCC					xPAF15 K101AK105A mutation
	22		GCTCAGCCTGAGAAGGAAAATAGAATTC					xPAF15 S79A mutation
	23		TGTGGATGGTGATCCAAGAAGTCT					xPAF15 S79A mutation
	24		GCTGGTGCAGGAAAAAAACCCAGAAAGT					xPAF15 S97A mutation
	25		GCCACCAGCTTCCTCATCATCAGAT					xPAF15 S97A mutation
	26		TCCTGCACCAGCGCCACCAGCTTCCTCATCAT					xPAF15 SAKA mutation
	27		TTGCACTCGAGAATTCATGGCGGCCCAGTCCACT					xDNMT1 amplification
	28		TTTGTAGTCGGTCGACTCATCTGTTTCCATCTTTTCA					xDNMT1 amplification
	29		GCCGCTCCAGAATTCATGGCGGCCCAGTCCACT					pVL1392-xDNMT1-3xFLAG
	30		CCCTCTAGACTCGAGATCTGTTTCCATCTTTTCA					pVL1392-xDNMT1-3xFLAG
	31		AGCCAAGGTTTTAGTGGCATGAACCGGT					xDNMT1 C1101S mutation
	32		GGGGGGCCCTCCGCAGAGCATTTCC					xDNMT1 C1101S mutation
